# Supplementary material
Source: MDPI journal article supplement (https://www.mdpi.com/2673-8015/2/4/20)
Supplement: s1 [file s1]

| Molecule name                                                                  | Polarizability<br>exp | Polarizability<br>calc | Deviation |
|--------------------------------------------------------------------------------|-----------------------|------------------------|-----------|
| ((3-Methylbutoxy)methyl)benzene                                                | 22.05                 | 22.25                  | -0.20     |
| ((4-tert-Butylphenoxy)methyl)oxirane                                           | 23.78                 | 24.01                  | -0.23     |
| ((Chloromethoxy)methyl)benzene                                                 | 16.61                 | 16.82                  | -0.21     |
| (-)-alpha-Pinene                                                               | 15.53                 | 15.58                  | -0.05     |
| (-)-Carveol                                                                    | 18.53                 | 18.75                  | -0.22     |
| (+)-alpha-Thujene                                                              | 17.53                 | 17.41                  | 0.12      |
| (1-Bromoethyl)benzene                                                          | 17.38                 | 17.34                  | 0.04      |
| (1-Bromovinyl)benzene                                                          | 17.41                 | 17.07                  | 0.34      |
| (1-Methylvinyl)cyclopropane                                                    | 11.09                 | 10.90                  | 0.19      |
| (2-Bromoethyl)benzene                                                          | 17.35                 | 17.32                  | 0.03      |
| (2-Bromoethyl)cyclohexane                                                      | 17.72                 | 17.73                  | -0.01     |
| (2-Chloro-1,1-dimethylethyl)benzene                                            | 19.56                 | 19.82                  | -0.26     |
| (2-Iodoethyl)benzene                                                           | 19.66                 | 19.36                  | 0.30      |
| (2-Methyl-1-propenyl)benzene                                                   | 18.23                 | 17.87                  | 0.36      |
| (2-Phenylethyl)trichlorosilane                                                 | 23.24                 | 23.22                  | 0.02      |
| (3-Bromopropyl)benzene                                                         | 19.01                 | 19.16                  | -0.15     |
| (3-Chloropropyl)benzene                                                        | 17.53                 | 17.99                  | -0.46     |
| (3-Chloropropyl)trichlorosilane                                                | 17.15                 | 17.22                  | -0.07     |
| (3-Chloropropyl)trimethoxysilane                                               | 18.44                 | 18.48                  | -0.04     |
| (3-Chloropropyl)trimethylsilane                                                | 17.63                 | 17.57                  | 0.06      |
| (4-Bromophenoxy)trimethylsilane                                                | 23.21                 | 23.17                  | 0.04      |
| (4-Chlorophenyl)trichlorosilane                                                | 21.82                 | 21.46                  | 0.36      |
| (4-Methoxyphenyl)trimethylsilane                                               | 22.57                 | 22.49                  | 0.08      |
| (4-Methylphenyl)trimethylsilane                                                | 21.73                 | 21.81                  | -0.08     |
| (5Z,8Z,11Z,14Z)-Eicosatetraenoic acid                                          | 37.91                 | 37.87                  | 0.04      |
| (6Z)-Octadecenoic acid                                                         | 34.81                 | 34.44                  | 0.37      |
| (9Z)-Octadecenoic acid                                                         | 34.21                 | 34.44                  | -0.23     |
| (Bromomethyl)chlorodimethylsilane                                              | 14.89                 | 14.89                  | 0.00      |
| (Bromomethyl)cyclohexane                                                       | 15.84                 | 15.90                  | -0.06     |
| (Bromomethyl)oxirane                                                           | 9.62                  | 9.25                   | 0.37      |
| (Bromomethyl)trimethylsilane                                                   | 15.10                 | 15.09                  | 0.01      |
| (Chloromethoxy)ethane                                                          | 8.99                  | 8.92                   | 0.07      |
| (Chloromethyl)benzene                                                          | 14.29                 | 14.32                  | -0.03     |
| (Chloromethyl)cyclopropane                                                     | 9.56                  | 9.23                   | 0.33      |
| (Chloromethyl)trichlorosilane                                                  | 13.52                 | 13.53                  | -0.01     |
| (Chloromethyl)trimethylsilane                                                  | 13.93                 | 13.88                  | 0.05      |
| (cis-2-Bromovinyl)benzene                                                      | 17.31                 | 17.16                  | 0.15      |
| (Dichloromethyl)trichlorosilane                                                | 15.60                 | 15.48                  | 0.12      |
| (Diethylamino fluoro oxophosphorus)<br>(bis(diethylamino) oxophosphorus) oxide | 33.15                 | 33.16                  | -0.01     |

|                                                                                   |       |       |       |
|-----------------------------------------------------------------------------------|-------|-------|-------|
| (Diethylamino fluoro oxophosphorus)<br>(bis(dimethylamino) oxophosphorus) oxide   | 25.93 | 25.88 | 0.05  |
| (Diethylamino fluoro oxophosphorus) (diethylamino<br>ethoxy oxophosphorus) oxide  | 28.60 | 28.68 | -0.08 |
| (Diethylamino fluoro thiophosphorus)<br>(bis(diethylamino) oxophosphorus) oxide   | 36.11 | 36.11 | 0.00  |
| (Diethylamino fluoro thiophosphorus) (diethylamino<br>fluoro oxophosphorus) oxide | 27.36 | 27.39 | -0.03 |
| (Diethylamino)acetonitrile                                                        | 13.16 | 13.29 | -0.13 |
| (Diethylamino)trimethylsilane                                                     | 18.76 | 18.67 | 0.09  |
| (Dimethylamino)acetonitrile                                                       | 9.54  | 9.65  | -0.11 |
| (E)-2-Undecenal                                                                   | 21.32 | 21.16 | 0.16  |
| (Ethoxy fluoro oxophosphorus) (diethoxy<br>oxophosphorus) oxide                   | 20.19 | 20.14 | 0.05  |
| (Ethoxymethyl)oxirane                                                             | 10.83 | 10.52 | 0.31  |
| (Ethylthio)benzene                                                                | 17.53 | 17.55 | -0.02 |
| (Fluoromethyl)benzene                                                             | 12.32 | 12.39 | -0.07 |
| (Iodomethyl)benzene                                                               | 17.81 | 17.52 | 0.29  |
| (Isopropylthio)benzene                                                            | 19.41 | 19.38 | 0.03  |
| (Methoxymethyl)oxirane                                                            | 9.16  | 8.67  | 0.49  |
| (Methylsulfonyl)ethene                                                            | 9.57  | 9.42  | 0.15  |
| (Methylthio)acetic acid                                                           | 10.05 | 10.04 | 0.01  |
| (Methylthio)ethene                                                                | 9.31  | 9.15  | 0.16  |
| (trans-1-Butenyl)benzene                                                          | 18.29 | 17.85 | 0.44  |
| (trans-2-Bromovinyl)benzene                                                       | 17.62 | 17.16 | 0.46  |
| (Trichloromethyl)oxirane                                                          | 12.02 | 12.01 | 0.01  |
| (Z) 9-Octadecen-1-ol                                                              | 34.38 | 34.36 | 0.02  |
| [1,1'-Bicyclopentyl]-2-one                                                        | 17.48 | 17.58 | -0.10 |
| 1-(1,1,2,2-Tetrafluoroethoxy)dodecane                                             | 27.79 | 27.51 | 0.28  |
| 1-(1,1,2,2-Tetrafluoroethoxy)octadecane                                           | 38.55 | 38.53 | 0.02  |
| 1-(1-Cyclohexen-1-yl)ethanone                                                     | 14.69 | 14.74 | -0.05 |
| 1-(1-Hydroxycyclohexyl)ethanone                                                   | 15.26 | 15.33 | -0.07 |
| 1-(2-Cyanoethyl)-3-(2-hydroxyethyl)-imidazolium<br>chloride                       | 20.24 | 19.98 | 0.26  |
| 1-(2-Cyanoethyl)-3-(2-propen-1-yl)-imidazolium<br>chloride                        | 21.19 | 21.13 | 0.06  |
| 1-(2-Cyanoethyl)-3-octylimidazolium 3-<br>sulfobenzoate                           | 44.23 | 44.50 | -0.27 |
| 1-(2-Furanyl)-1-propanone                                                         | 13.44 | 13.19 | 0.25  |
| 1-(2-Furanyl)-2-propanone                                                         | 13.19 | 13.19 | 0.00  |
| 1-(2-Furyl)-2-ethyl-3-aminopropane                                                | 17.95 | 18.10 | -0.15 |
| 1-(2-Furyl)-2-ethyl-3-methylaminopropane                                          | 19.85 | 19.93 | -0.08 |
| 1-(2-Furyl)-2-ethyl-3-propanol                                                    | 17.25 | 17.30 | -0.05 |

|                                                                             |       |       |       |
|-----------------------------------------------------------------------------|-------|-------|-------|
| 1-(2-Furyl)-2-isopropyl-3-aminopropane                                      | 19.80 | 19.92 | -0.12 |
| 1-(2-Furyl)-2-methyl-3-aminopropane                                         | 16.21 | 16.26 | -0.05 |
| 1-(2-Furyl)-2-methyl-3-methylaminopropane                                   | 17.99 | 18.09 | -0.10 |
| 1-(2-Furyl)-2-methyl-3-propanol                                             | 15.37 | 15.46 | -0.09 |
| 1-(2-Furyl)-2-oxa-4-butanol                                                 | 14.23 | 14.31 | -0.08 |
| 1-(2-Furyl)-2-oxa-4-butyl acetate                                           | 19.15 | 19.39 | -0.24 |
| 1-(2-Furyl)-2-oxa-4-pentanol                                                | 16.10 | 16.15 | -0.05 |
| 1-(2-Furyl)-2-oxa-4-pentyl acetate                                          | 21.09 | 21.23 | -0.14 |
| 1-(2-Furyl)-3-aminobutane                                                   | 16.17 | 16.25 | -0.08 |
| 1-(2-Furyl)-3-aminoheptane                                                  | 21.53 | 21.76 | -0.23 |
| 1-(2-Furyl)-3-aminohexane                                                   | 19.76 | 19.92 | -0.16 |
| 1-(2-Furyl)-3-aminononane                                                   | 25.16 | 25.43 | -0.27 |
| 1-(2-Furyl)-3-aminopentane                                                  | 17.95 | 18.09 | -0.14 |
| 1-(2-Furyl)-3-ethyl-1-penten-3-ol                                           | 21.10 | 20.89 | 0.21  |
| 1-(2-Furyl)-3-ethyl-3-pentanol                                              | 20.86 | 20.97 | -0.11 |
| 1-(2-Furyl)-3-methyl-1-penten-3-ol                                          | 19.15 | 19.05 | 0.10  |
| 1-(2-Furyl)-3-methyl-3-pentanol                                             | 18.96 | 19.13 | -0.17 |
| 1-(2-Furyl)-3-methylaminobutane                                             | 18.00 | 18.08 | -0.08 |
| 1-(2-Furyl)-3-methylaminopentane                                            | 19.74 | 19.92 | -0.18 |
| 1-(2-Furyl)-3-propanol                                                      | 13.77 | 13.64 | 0.13  |
| 1-(2-Hydroxy-4-methylphenyl)ethanone                                        | 17.29 | 16.97 | 0.32  |
| 1-(2-Hydroxy-5-methylphenyl)-1-propanone                                    | 19.10 | 18.81 | 0.29  |
| 1-(2-Hydroxyethyl)-3-methylimidazolium<br>perfluoropentanoate               | 24.70 | 24.33 | 0.37  |
| 1-(2-Methylphenyl)ethanone                                                  | 15.95 | 16.27 | -0.32 |
| 1-(2-Pyridinyl)ethanone                                                     | 13.56 | 13.52 | 0.04  |
| 1-(2-Tetrahydrofuryl)-3-aminobutane                                         | 16.70 | 16.69 | 0.01  |
| 1-(2-Tetrahydrofuryl)-3-butanone                                            | 15.31 | 15.46 | -0.15 |
| 1-(3-Cyanopropyl)-3-methylimidazolium<br>bis(trifluoromethylsulfonyl) amide | 29.59 | 29.67 | -0.08 |
| 1-(3-Cyanopropyl)-3-methylimidazolium<br>dicyanamide                        | 22.58 | 22.75 | -0.17 |
| 1-(3-Cyanopropyl)-3-methylimidazolium<br>tetrafluoroborate                  | 18.58 | 18.88 | -0.30 |
| 1-(3-Cyanopropyl)-pyridinium<br>bis(trifluoromethylsulfonyl) amide          | 30.02 | 30.14 | -0.12 |
| 1-(3-Cyanopropyl)-pyridinium dicyanamide                                    | 22.89 | 23.23 | -0.34 |
| 1(3H)-Isobenzofuranone                                                      | 14.25 | 14.17 | 0.08  |
| 1-(3-Methylphenyl)ethanone                                                  | 16.24 | 16.27 | -0.03 |
| 1-(4-Isopropylphenyl)ethanone                                               | 20.16 | 19.92 | 0.24  |
| 1-(4-Methylphenyl)-1-propanone                                              | 18.22 | 18.10 | 0.12  |
| 1-(4-Methylphenyl)ethanol                                                   | 17.10 | 16.72 | 0.38  |
| 1-(Bromomethoxy)-2-methylbutane                                             | 16.21 | 16.05 | 0.16  |

|                                         |       |       |       |
|-----------------------------------------|-------|-------|-------|
| 1-(Bromomethoxy)-2-methylpropane        | 14.13 | 14.21 | -0.08 |
| 1-(Bromomethoxy)-3-methylbutane         | 16.02 | 16.05 | -0.03 |
| 1-(Bromomethyl)-2-methylbenzene         | 17.50 | 17.39 | 0.11  |
| 1-(Bromomethyl)-3-methylbenzene         | 17.45 | 17.39 | 0.06  |
| 1-(Chloromethoxy)propane                | 10.85 | 10.75 | 0.10  |
| 1-(Chloromethyl)-2-fluorobenzene        | 14.21 | 14.28 | -0.07 |
| 1-(Chloromethyl)-2-methylbenzene        | 16.48 | 16.23 | 0.25  |
| 1-(Chloromethyl)-3-methylbenzene        | 16.30 | 16.23 | 0.07  |
| 1-(Chloromethyl)-4-fluorobenzene        | 14.19 | 14.28 | -0.09 |
| 1-(Chloromethyl)-4-methylbenzene        | 16.59 | 16.23 | 0.36  |
| 1-(Chloromethyl)naphthalene             | 21.30 | 21.44 | -0.14 |
| 1-(Dimethylamino)-2-propanol            | 12.35 | 12.13 | 0.22  |
| 1,1,1,2,3,3,3-Heptachloropropane        | 19.88 | 19.91 | -0.03 |
| 1,1,1,2-Tetrachloroacetone              | 13.99 | 14.20 | -0.21 |
| 1,1,1,2-Tetrachloroethane               | 12.32 | 12.26 | 0.06  |
| 1,1,1,2-Tetrachloropropane              | 14.07 | 14.08 | -0.01 |
| 1,1,1,3,3,3-Hexafluoro-2-methoxypropane | 9.23  | 9.07  | 0.16  |
| 1,1,1,3,5,5,5-Heptamethyltrisiloxane    | 25.04 | 25.07 | -0.03 |
| 1,1,1,3,5,7,7,7-Octamethyltetrasiloxane | 30.71 | 30.73 | -0.02 |
| 1,1,1,3-Tetrachloropropane              | 14.18 | 14.09 | 0.09  |
| 1,1,1-Bromodichloroethane               | 11.50 | 11.47 | 0.03  |
| 1,1,1-Chlorodifluoro-2-iodoethane       | 11.46 | 11.59 | -0.13 |
| 1,1,1-Chlorodifluoro-4-iodobutane       | 15.29 | 15.27 | 0.02  |
| 1,1,1-Tributoxypropane                  | 30.08 | 30.07 | 0.01  |
| 1,1,1-Trichloroacetone                  | 12.29 | 12.30 | -0.01 |
| 1,1,1-Trichlorotrifluoroethane          | 10.41 | 10.46 | -0.05 |
| 1,1,1-Triethoxyethane                   | 17.54 | 17.22 | 0.32  |
| 1,1,1-Triethoxypropane                  | 19.13 | 19.06 | 0.07  |
| 1,1,1-Trifluoro-2-iodoethane            | 9.49  | 9.74  | -0.25 |
| 1,1,1-Trifluoro-2-propanol              | 6.96  | 7.03  | -0.07 |
| 1,1,1-Trifluoroethane                   | 4.40  | 4.63  | -0.23 |
| 1,1,1-Trihexoxypropane                  | 40.95 | 41.08 | -0.13 |
| 1,1,1-Trimethoxyethane                  | 11.85 | 11.68 | 0.17  |
| 1,1,1-Trioctyloxypropane                | 51.91 | 52.09 | -0.18 |
| 1,1,1-Tripropoxypropane                 | 24.28 | 24.56 | -0.28 |
| 1,1,2,2,3-Pentachloropropane            | 15.70 | 15.90 | -0.20 |
| 1,1,2,2-Tetrabromobutane                | 20.25 | 20.43 | -0.18 |
| 1,1,2,2-Tetrabromoethane                | 16.55 | 16.63 | -0.08 |
| 1,1,2,2-Tetrachloro-1,2-difluoroethane  | 12.25 | 12.20 | 0.05  |
| 1,1,2,2-Tetrachloro-1-fluoroethane      | 12.50 | 12.19 | 0.31  |
| 1,1,2,2-Tetrachloroethane               | 12.14 | 12.18 | -0.04 |
| 1,1,2,2-Tetrachlorohexane               | 19.53 | 19.51 | 0.02  |

|                                              |       |       |       |
|----------------------------------------------|-------|-------|-------|
| 1,1,2,2-Tetra-t-butylethane                  | 33.80 | 33.82 | -0.02 |
| 1,1,2,3,3-Pentachloro-1-propene              | 16.11 | 15.90 | 0.21  |
| 1,1,2,3-Tetrachloropropane                   | 14.10 | 13.97 | 0.13  |
| 1,1,2-Tribromobutane                         | 17.37 | 17.33 | 0.04  |
| 1,1,2-Tribromoethane                         | 13.68 | 13.64 | 0.04  |
| 1,1,2-Tribromopropane                        | 15.71 | 15.50 | 0.21  |
| 1,1,2-Trichloroethane                        | 10.27 | 10.25 | 0.02  |
| 1,1,2-Trimethylcyclohexane                   | 16.50 | 16.49 | 0.01  |
| 1,1,2-Trimethylcyclopentane                  | 14.69 | 14.66 | 0.03  |
| 1,1,2-Trimethylcyclopropane                  | 11.37 | 10.99 | 0.38  |
| 1,1,3,3-Tetramethoxypropane                  | 16.11 | 16.20 | -0.09 |
| 1,1,3,3-Tetramethyl-1,3-diphenyldisiloxane   | 35.23 | 35.16 | 0.07  |
| 1,1,3,3-Tetramethylcyclopentane              | 16.69 | 16.50 | 0.19  |
| 1,1,3,3-Tetramethyldisiloxane                | 15.93 | 15.95 | -0.02 |
| 1,1,3,3-Tetramethylguanidinium butanoate     | 22.29 | 22.25 | 0.04  |
| 1,1,3,3-Tetramethylguanidinium heptanoate    | 28.00 | 27.76 | 0.24  |
| 1,1,3,3-Tetramethylguanidinium hexanoate     | 25.66 | 25.92 | -0.26 |
| 1,1,3,3-Tetramethylguanidinium octanoate     | 29.48 | 29.59 | -0.11 |
| 1,1,3,3-Tetramethylguanidinium pentanoate    | 24.12 | 24.09 | 0.03  |
| 1,1,3,5,7,9-Hexaethoxydecane                 | 44.70 | 44.67 | 0.03  |
| 1,1,3,5,7-Pentaethoxyoctane                  | 36.96 | 36.79 | 0.17  |
| 1,1,3,5-Tetraethoxy-5-methylhexane           | 30.92 | 30.98 | -0.06 |
| 1,1,3-Trichloropropane                       | 12.07 | 12.09 | -0.02 |
| 1,1,3-Trimethylcyclopentane                  | 14.87 | 14.66 | 0.21  |
| 1,10-Decanediol bis(perfluorobutyrate)       | 36.34 | 36.10 | 0.24  |
| 1,10-Decanedithiol                           | 25.30 | 25.28 | 0.02  |
| 1,10-Dichlorodecane                          | 23.00 | 23.01 | -0.01 |
| 1,10-Undecadiyne                             | 19.41 | 19.42 | -0.01 |
| 1,11-Undecanedithiol                         | 27.11 | 27.12 | -0.01 |
| 1,13-Tridecanedioic acid                     | 25.92 | 25.98 | -0.06 |
| 1,14-Tetradecanedioic acid                   | 27.76 | 27.81 | -0.05 |
| 1,1-Bis(butylthio)ethane                     | 25.50 | 25.46 | 0.04  |
| 1,1-Bis(ethoxycarbonyl)-2-methylcyclopentane | 23.21 | 23.39 | -0.18 |
| 1,1-Bis(ethylthio)-2-butyne                  | 20.93 | 21.19 | -0.26 |
| 1,1-Bis(ethylthio)ethane                     | 18.13 | 18.12 | 0.01  |
| 1,1-Bis(ethylthio)propane                    | 21.69 | 21.79 | -0.10 |
| 1,1-Bis(isobutylthio)ethane                  | 25.39 | 25.43 | -0.04 |
| 1,1-Bis(isopropylthio)ethane                 | 21.81 | 21.78 | 0.03  |
| 1,1-Bis(methoxycarbonyl)cyclohexane          | 19.49 | 19.71 | -0.22 |
| 1,1-Bis(methylthio)-cyclohexane              | 20.83 | 20.89 | -0.06 |
| 1,1-Bis(methylthio)propane                   | 16.42 | 16.11 | 0.31  |
| 1,1-Bis(propylthio)ethane                    | 21.61 | 21.79 | -0.18 |

|                                    |       |       |       |
|------------------------------------|-------|-------|-------|
| 1,1-Cyclohexanedithiol             | 17.13 | 17.19 | -0.06 |
| 1,1-Di(2-chloroethoxy)ethane       | 17.07 | 16.94 | 0.13  |
| 1,1-Dibromo-1-butene               | 13.98 | 14.12 | -0.14 |
| 1,1-Dibromo-1-heptene              | 19.76 | 19.63 | 0.13  |
| 1,1-Dibromo-1-hexene               | 17.73 | 17.79 | -0.06 |
| 1,1-Dibromo-1-octene               | 21.71 | 21.46 | 0.25  |
| 1,1-Dibromo-1-pentene              | 15.88 | 15.96 | -0.08 |
| 1,1-Dibromo-1-propene              | 12.28 | 12.28 | 0.00  |
| 1,1-Dibromobutane                  | 14.08 | 14.25 | -0.17 |
| 1,1-Dibromoethane                  | 10.64 | 10.58 | 0.06  |
| 1,1-Dibromopropane                 | 12.08 | 12.41 | -0.33 |
| 1,1-Dibutylhydrazine               | 18.44 | 18.41 | 0.03  |
| 1,1-Dichloro-1,3-butadiene         | 12.17 | 11.83 | 0.34  |
| 1,1-Dichloro-1-fluoroethane        | 8.19  | 8.36  | -0.17 |
| 1,1-Dichloro-2,2-difluoroethane    | 8.02  | 8.30  | -0.28 |
| 1,1-Dichloro-2-fluoropropene       | 9.92  | 10.08 | -0.16 |
| 1,1-Dichloro-2-methylpropane       | 11.81 | 12.00 | -0.19 |
| 1,1-Dichloro-3,3-dimethylbutane    | 15.75 | 15.68 | 0.07  |
| 1,1-Dichloro-3,3-dimethylpentane   | 17.45 | 17.52 | -0.07 |
| 1,1-Dichlorobutane                 | 12.11 | 12.02 | 0.09  |
| 1,1-Dichlorocyclohexane            | 14.92 | 14.83 | 0.09  |
| 1,1-Dichloroethane                 | 8.38  | 8.35  | 0.03  |
| 1,1-Dichloropropane                | 10.20 | 10.18 | 0.02  |
| 1,1-Dichloropropene                | 9.83  | 10.12 | -0.29 |
| 1,1-Diethoxycyclohexane            | 19.29 | 19.59 | -0.30 |
| 1,1-Diethoxycyclopentane           | 17.69 | 17.75 | -0.06 |
| 1,1-Diethoxyethane                 | 13.25 | 13.14 | 0.11  |
| 1,1-Diethoxypentane                | 18.69 | 18.64 | 0.05  |
| 1,1-Diethoxypropane                | 15.14 | 14.97 | 0.17  |
| 1,1-Diethylhydrazine               | 11.08 | 11.07 | 0.01  |
| 1,1-Difluoro-1,2,2-trichloroethane | 10.28 | 10.32 | -0.04 |
| 1,1-Difluoro-1-ethoxy-2-iodoethane | 14.07 | 14.31 | -0.24 |
| 1,1-Dimethoxyhexadecane            | 34.92 | 35.14 | -0.22 |
| 1,1-Dimethylbutyl acetate          | 15.99 | 16.20 | -0.21 |
| 1,1-Dimethylcyclohexane            | 14.69 | 14.67 | 0.02  |
| 1,1-Dimethylcyclopentane           | 12.96 | 12.84 | 0.12  |
| 1,1-Dimethylcyclopropane           | 9.45  | 9.17  | 0.28  |
| 1,1-Dimethylhydrazine              | 7.42  | 7.43  | -0.01 |
| 1,1-Dimethylindane                 | 18.98 | 18.98 | 0.00  |
| 1,1-Dimethylpropargylamine         | 10.63 | 10.55 | 0.08  |
| 1,1-Dipentylhydrazine              | 22.10 | 22.08 | 0.02  |
| 1,1-Diphenylbutane                 | 27.41 | 27.64 | -0.23 |

|                                                             |       |       |       |
|-------------------------------------------------------------|-------|-------|-------|
| 1,1-Diphenylethane                                          | 23.90 | 23.97 | -0.07 |
| 1,1-Diphenylethylene                                        | 24.16 | 23.89 | 0.27  |
| 1,1-Dipropoxyethane                                         | 16.80 | 16.81 | -0.01 |
| 1,1-Dipropylhydrazine                                       | 14.77 | 14.74 | 0.03  |
| 1,1-Ethanediol diacetate                                    | 13.08 | 13.18 | -0.10 |
| 1,1-Propanedithiol                                          | 14.16 | 14.25 | -0.09 |
| 1,2,2,3-Tetrabromobutane                                    | 20.38 | 20.53 | -0.15 |
| 1,2,2,3-Tetrachloropropane                                  | 13.99 | 13.98 | 0.01  |
| 1,2,2-Tribromobutane                                        | 17.62 | 17.45 | 0.17  |
| 1,2,2-Tribromopropane                                       | 15.82 | 15.61 | 0.21  |
| 1,2,2-Trichloropropane                                      | 12.17 | 12.07 | 0.10  |
| 1,2,2-Trimethylpropylacetate                                | 16.19 | 16.22 | -0.03 |
| 1,2,2-Tris(butylthio)-propane                               | 37.80 | 37.89 | -0.09 |
| 1,2,2-Tris(isobutylthio)-propane                            | 37.65 | 37.84 | -0.19 |
| 1,2,2-Tris(isopropylthio)-propane                           | 32.20 | 32.37 | -0.17 |
| 1,2,2-Tris(propylthio)-propane                              | 32.37 | 32.39 | -0.02 |
| 1,2,3,4,5,6,7,8-Octahydroanthracene                         | 23.78 | 23.78 | 0.00  |
| 1,2,3,4-Tetrachloro-5,5-dimethoxy-1,3-cyclopentadiene       | 21.47 | 21.70 | -0.23 |
| 1,2,3,4-Tetrachlorobutadiene                                | 15.87 | 15.65 | 0.22  |
| 1,2,3,4-Tetrafluorobenzene                                  | 10.07 | 10.35 | -0.28 |
| 1,2,3,4-Tetrahydro-1,1,6-trimethylnaphthalene               | 22.79 | 22.72 | 0.07  |
| 1,2,3,4-Tetrahydro-1,5-dimethylnaphthalene                  | 20.72 | 20.87 | -0.15 |
| 1,2,3,4-Tetrahydro-6-methylnaphthalene                      | 18.94 | 19.05 | -0.11 |
| 1,2,3,4-Tetrahydroisoquinoline                              | 16.20 | 16.65 | -0.45 |
| 1,2,3,4-Tetrahydronaphthalene                               | 17.08 | 17.15 | -0.07 |
| 1,2,3,4-Tetrahydroquinoline                                 | 17.20 | 16.95 | 0.25  |
| 1,2,3,4-Tetramethylcyclohexane                              | 18.29 | 18.29 | 0.00  |
| 1,2,3,5-Tetramethylbenzene                                  | 17.96 | 18.14 | -0.18 |
| 1,2,3-Propanetriol                                          | 8.14  | 8.04  | 0.10  |
| 1,2,3-Tribromobutane                                        | 17.45 | 17.43 | 0.02  |
| 1,2,3-Tribromopropane                                       | 15.44 | 15.58 | -0.14 |
| 1,2,3-Trichloro-1,1,2,3,3-pentafluoropropane                | 12.21 | 12.26 | -0.05 |
| 1,2,3-Trichloropropane                                      | 12.06 | 12.05 | 0.01  |
| 1,2,3-Trichloropropene                                      | 12.07 | 11.99 | 0.08  |
| 1,2,3-Trimethylindene                                       | 20.64 | 20.78 | -0.14 |
| 1,2,4,5-Tetrafluorobenzene                                  | 10.29 | 10.35 | -0.06 |
| 1,2,4,5-Tetramethylbenzene                                  | 18.00 | 18.14 | -0.14 |
| 1,2,4a,5,8,8a-Hexahydro-4,7-dimethyl-1-isopropylnaphthalene | 26.07 | 26.52 | -0.45 |
| 1,2,4-Tribromobutane                                        | 17.43 | 17.41 | 0.02  |
| 1,2,4-Trichlorobenzene                                      | 16.21 | 16.24 | -0.03 |

|                                                 |       |       |       |
|-------------------------------------------------|-------|-------|-------|
| 1,2,4-Triethylbenzene                           | 21.74 | 21.74 | 0.00  |
| 1,2,4-Trifluorobenzene                          | 10.42 | 10.39 | 0.03  |
| 1,2,4-Triisopropylbenzene                       | 27.30 | 27.20 | 0.10  |
| 1,2,4-Trimethyl-5-hexadecylbenzene              | 45.57 | 45.67 | -0.10 |
| 1,2,4-Trimethyl-5-hexadecylcyclohexane          | 45.69 | 45.82 | -0.13 |
| 1,2,4-Trimethylbenzene                          | 16.13 | 16.23 | -0.10 |
| 1,2,5,6-Tetrahydropyridine                      | 10.27 | 10.43 | -0.16 |
| 1,2,5-Trimethylpyrrole                          | 13.87 | 13.89 | -0.02 |
| 1,2-Benzopyran                                  | 16.01 | 15.92 | 0.09  |
| 1,2-Bis(1,1,2,2-tetrafluoroethoxy)ethane        | 14.00 | 13.80 | 0.20  |
| 1,2-Bis(2-chloroethoxy)ethane                   | 16.97 | 17.01 | -0.04 |
| 1,2-Bis(dimethylamino)ethane                    | 15.07 | 14.95 | 0.12  |
| 1,2-Bis(dipentylborinoxy)ethane                 | 46.03 | 46.02 | 0.01  |
| 1,2-Bis(tributylsilyl)acetylene                 | 54.73 | 54.79 | -0.06 |
| 1,2-Bis(triethylsilyl)ethane                    | 33.93 | 34.02 | -0.09 |
| 1,2-Bis(trimethylsilyl)acetylene                | 21.87 | 21.90 | -0.03 |
| 1,2-Butadiene                                   | 8.04  | 8.17  | -0.13 |
| 1,2-Butanediol                                  | 9.35  | 9.31  | 0.04  |
| 1,2-Cycloheptanedione                           | 13.16 | 13.06 | 0.10  |
| 1,2-Cyclohexanedione                            | 11.68 | 11.23 | 0.45  |
| 1,2-Diaminobenzene                              | 13.80 | 13.74 | 0.06  |
| 1,2-Dibromo-1,1-difluoroethane                  | 10.63 | 10.64 | -0.01 |
| 1,2-Dibromo-1,3,4,4-tetrachlorobutane           | 21.89 | 21.94 | -0.05 |
| 1,2-Dibromo-2-methylpropane                     | 14.41 | 14.39 | 0.02  |
| 1,2-Dibromo-4,4-dimethylhexane                  | 21.60 | 21.68 | -0.08 |
| 1,2-Dibromo-4,4-dimethylpentane                 | 19.90 | 19.84 | 0.06  |
| 1,2-Dibromobenzene                              | 16.46 | 16.53 | -0.07 |
| 1,2-Dibromoethane                               | 10.70 | 10.66 | 0.04  |
| 1,2-Dibromoheptane                              | 19.89 | 19.85 | 0.04  |
| 1,2-Dibromohexane                               | 18.11 | 18.02 | 0.09  |
| 1,2-Dibromopentane                              | 16.32 | 16.18 | 0.14  |
| 1,2-Dibromopropane                              | 12.59 | 12.51 | 0.08  |
| 1,2-Dibromotetrafluoroethane                    | 10.60 | 10.63 | -0.03 |
| 1,2-Dibutoxyethane                              | 20.63 | 20.54 | 0.09  |
| 1,2-Dichloro-1,1-difluoroethane                 | 8.38  | 8.39  | -0.01 |
| 1,2-Dichloro-1,2-difluoroethane                 | 8.38  | 8.41  | -0.03 |
| 1,2-Dichloro-1,3-butadiene                      | 11.88 | 11.80 | 0.08  |
| 1,2-Dichloro-1-fluoroethane                     | 8.37  | 8.37  | 0.00  |
| 1,2-Dichloro-2-methylpropane                    | 12.07 | 12.04 | 0.03  |
| 1,2-Dichloro-3,3,4,4,5,5-hexafluorocyclopentene | 13.20 | 13.45 | -0.25 |
| 1,2-Dichloro-3,4-dimethylpentane                | 17.52 | 17.45 | 0.07  |
| 1,2-Dichloro-4-(trichloromethyl)benzene         | 22.18 | 22.08 | 0.10  |



|                                     |       |       |       |
|-------------------------------------|-------|-------|-------|
| 1,2-Dichloro-4,4-dimethylhexane     | 19.22 | 19.31 | -0.09 |
| 1,2-Dichlorobenzene                 | 14.25 | 14.33 | -0.08 |
| 1,2-Dichlorobutane                  | 12.05 | 11.98 | 0.07  |
| 1,2-Dichlorohexafluoropropane       | 10.52 | 10.41 | 0.11  |
| 1,2-Dichloronaphthalene             | 21.24 | 21.45 | -0.21 |
| 1,2-Dichloropentane                 | 13.78 | 13.81 | -0.03 |
| 1,2-Dichloropropane                 | 10.20 | 10.14 | 0.06  |
| 1,2-Diethoxybenzene                 | 19.51 | 19.38 | 0.13  |
| 1,2-Diethylbenzene                  | 17.89 | 18.00 | -0.11 |
| 1,2-Diethylhydrazine                | 11.10 | 11.01 | 0.09  |
| 1,2-Diethylpyridinium ethylsulfate  | 25.56 | 25.54 | 0.02  |
| 1,2-Difluorobenzene                 | 10.38 | 10.43 | -0.05 |
| 1,2-Dihydronaphthalene              | 17.26 | 17.07 | 0.19  |
| 1,2-Diiodobenzene                   | 20.29 | 20.48 | -0.19 |
| 1,2-Diisobutylhydrazine             | 18.37 | 18.32 | 0.05  |
| 1,2-Diisopropylbenzene              | 21.60 | 21.64 | -0.04 |
| 1,2-Diisopropylhydrazine            | 14.68 | 14.63 | 0.05  |
| 1,2-Dimethoxy-4-allylbenzene        | 21.12 | 21.14 | -0.02 |
| 1,2-Dimethyl-3-nitrobenzene         | 16.59 | 16.97 | -0.38 |
| 1,2-Dimethyl-5-propylpyrrole        | 17.66 | 17.56 | 0.10  |
| 1,2-Dimethyl-5-propylpyrrolidine    | 17.84 | 17.99 | -0.15 |
| 1,2-Dimethylbenzene                 | 14.20 | 14.33 | -0.13 |
| 1,2-Dimethylcyclohexene             | 14.61 | 14.66 | -0.05 |
| 1,2-Dimethylcyclopentene            | 12.79 | 12.82 | -0.03 |
| 1,2-Dimethylenecyclohexane          | 14.36 | 14.49 | -0.13 |
| 1,2-Dimethylhydrazine               | 7.30  | 7.37  | -0.07 |
| 1,2-Dimethylnaphthalene             | 21.28 | 21.45 | -0.17 |
| 1,2-Dimethylpiperidine              | 14.34 | 14.35 | -0.01 |
| 1,2-Dimethylpropylamine             | 11.29 | 11.34 | -0.05 |
| 1,2-Dinitroethane                   | 8.71  | 9.07  | -0.36 |
| 1,2-Diphenylbutane                  | 27.68 | 27.64 | 0.04  |
| 1,2-Dipiperidinoethane              | 24.36 | 24.20 | 0.16  |
| 1,2-Dipropoxyethane                 | 16.95 | 16.87 | 0.08  |
| 1,2-Dis(trimethylsilyl)-ethylene    | 23.19 | 23.01 | 0.18  |
| 1,2-Epoxy-4-(epoxyethyl)cyclohexane | 14.36 | 14.32 | 0.04  |
| 1,2-Ethanediol                      | 5.73  | 5.64  | 0.09  |
| 1,2-Ethanediol dinitrate            | 10.49 | 10.56 | -0.07 |
| 1,2-Ethanedithiol                   | 10.72 | 10.60 | 0.12  |
| 1,2-Oxathiane 2,2-dioxide           | 11.19 | 11.12 | 0.07  |
| 1,2-Pentadiene                      | 9.89  | 10.01 | -0.12 |
| 1,2-Pentenediol                     | 11.18 | 11.15 | 0.03  |
| 1,2-Propanediol                     | 7.56  | 7.48  | 0.08  |

|                                                                           |       |       |       |
|---------------------------------------------------------------------------|-------|-------|-------|
| 1,2-Propanediol diacetate                                                 | 15.09 | 15.09 | 0.00  |
| 1,2-Propanediolsulfite                                                    | 9.79  | 9.99  | -0.20 |
| 1,3,4,4-Tetrachloro-1-butene                                              | 15.76 | 15.69 | 0.07  |
| 1,3,4,5,6,6-Hexachloro-1-hexene                                           | 23.06 | 23.13 | -0.07 |
| 1,3,5-Cycloheptatriene                                                    | 12.80 | 12.61 | 0.19  |
| 1,3,5-Cyclooctatriene                                                     | 14.21 | 14.44 | -0.23 |
| 1,3,5-Tributylborazine                                                    | 31.55 | 31.66 | -0.11 |
| 1,3,5-Triethylbenzene                                                     | 21.81 | 21.74 | 0.07  |
| 1,3,5-Triethylborazine                                                    | 20.80 | 20.64 | 0.16  |
| 1,3,5-Trifluorobenzene                                                    | 10.25 | 10.39 | -0.14 |
| 1,3,5-Triisopropylbenzene                                                 | 27.32 | 27.20 | 0.12  |
| 1,3,5-Trimethyl-1H-pyrazole                                               | 12.88 | 13.01 | -0.13 |
| 1,3,5-Trimethyladamantane                                                 | 22.53 | 22.12 | 0.41  |
| 1,3,5-Trimethylbenzene                                                    | 16.25 | 16.23 | 0.02  |
| 1,3,5-Trisilacyclohexane                                                  | 17.32 | 17.22 | 0.10  |
| 1,3,6-Tricyanohexane                                                      | 17.02 | 17.10 | -0.08 |
| 1,3-Benzodioxole                                                          | 12.79 | 12.93 | -0.14 |
| 1,3-Bis(1-methyl-4-piperidyl)propane                                      | 29.98 | 29.68 | 0.30  |
| 1,3-Bis(1-methylethenyl)benzene                                           | 21.83 | 21.48 | 0.35  |
| 1,3-Bis(bromomethyl)tetramethyldisiloxane                                 | 25.53 | 25.55 | -0.02 |
| 1,3-Bis(chloromethyl)tetramethyldisiloxane                                | 23.11 | 23.11 | 0.00  |
| 1,3-Bis(dibutoxyboryl)propane                                             | 41.51 | 41.55 | -0.04 |
| 1,3-Bis(dichloroboryl)propane                                             | 17.49 | 17.54 | -0.05 |
| 1,3-Bis(dichloromethyl)tetramethyldisiloxane                              | 26.98 | 27.03 | -0.05 |
| 1,3-Bis(dimethoxyboryl)propane                                            | 19.41 | 19.48 | -0.07 |
| 1,3-Bis(dimethylamino)-2-propanol                                         | 17.45 | 17.35 | 0.10  |
| 1,3-Bis(trifluoromethyl)benzene                                           | 14.64 | 14.55 | 0.09  |
| 1,3-Bis(trimethylsiloxy)benzene                                           | 29.88 | 29.80 | 0.08  |
| 1,3-Butanediol dinitrate                                                  | 14.09 | 14.23 | -0.14 |
| 1,3-Butanediolsulfite                                                     | 12.01 | 11.83 | 0.18  |
| 1,3-Butyleneglycol                                                        | 9.37  | 9.31  | 0.06  |
| 1,3-Cycloheptadiene                                                       | 12.60 | 12.69 | -0.09 |
| 1,3-Cyclohexadiene                                                        | 10.65 | 10.85 | -0.20 |
| 1,3-Cyclohexanedione                                                      | 11.16 | 11.23 | -0.07 |
| 1,3-Di(4-methylpentyl)-1,3-diphospha-2,4-dithiacyclobutane 1,3-dithioxide | 42.40 | 42.56 | -0.16 |
| 1,3-Diacetin                                                              | 15.59 | 15.65 | -0.06 |
| 1,3-Diaminobenzene                                                        | 13.46 | 13.74 | -0.28 |
| 1,3-Dibromo-1,1-dichloropropane                                           | 16.34 | 16.37 | -0.03 |
| 1,3-Dibromo-2,2-dimethylpropane                                           | 16.22 | 16.15 | 0.07  |
| 1,3-Dibromo-2-propanol                                                    | 12.87 | 13.05 | -0.18 |
| 1,3-Dibromobenzene                                                        | 16.57 | 16.53 | 0.04  |

|                                                                 |       |       |       |
|-----------------------------------------------------------------|-------|-------|-------|
| 1,3-Dibromobutane                                               | 14.15 | 14.35 | -0.20 |
| 1,3-Dibromopropane                                              | 12.36 | 12.49 | -0.13 |
| 1,3-Dibromopropyne                                              | 11.74 | 11.75 | -0.01 |
| 1,3-Dichloro-2-propanol                                         | 10.83 | 10.72 | 0.11  |
| 1,3-Dichloro-2-propanol nitrate                                 | 12.91 | 13.18 | -0.27 |
| 1,3-Dichloroacetone                                             | 10.19 | 10.27 | -0.08 |
| 1,3-Dichlorobenzene                                             | 14.32 | 14.33 | -0.01 |
| 1,3-Dichlorobutane                                              | 12.00 | 11.98 | 0.02  |
| 1,3-Dichloropropane                                             | 10.12 | 10.16 | -0.04 |
| 1,3-Dichloro-trans-2-butene                                     | 11.96 | 11.96 | 0.00  |
| 1,3-Diethylbenzene                                              | 18.05 | 18.00 | 0.05  |
| 1,3-Diethylimidazolium bis(trifluoromethylsulfonyl) amide       | 27.86 | 27.90 | -0.04 |
| 1,3-Difluoro-2-propanol                                         | 6.99  | 6.85  | 0.14  |
| 1,3-Difluorobenzene                                             | 10.25 | 10.43 | -0.18 |
| 1,3-Difluoropropane                                             | 6.24  | 6.29  | -0.05 |
| 1,3-Dihexyl-1,3-diphospha-2,4-dithiacyclobutane 1,3-dithioxide  | 42.59 | 42.59 | 0.00  |
| 1,3-Diiodohexafluoropropane                                     | 16.72 | 16.66 | 0.06  |
| 1,3-Diiodopropane                                               | 16.48 | 16.57 | -0.09 |
| 1,3-Diisopropylbenzene                                          | 21.66 | 21.64 | 0.02  |
| 1,3-Dimethoxy-1-ethoxy-5-methyl-4-hexene                        | 22.69 | 22.91 | -0.22 |
| 1,3-Dimethoxybenzene                                            | 15.90 | 15.68 | 0.22  |
| 1,3-Dimethyl-1H-pyrazole                                        | 11.19 | 11.18 | 0.01  |
| 1,3-Dimethyl-2-oxo-hexahydro-pyrimidine                         | 13.81 | 13.67 | 0.14  |
| 1,3-Dimethyladamantane                                          | 20.44 | 20.28 | 0.16  |
| 1,3-Dimethylbenzene                                             | 14.33 | 14.33 | 0.00  |
| 1,3-Dimethylcyclohexene                                         | 14.66 | 14.62 | 0.04  |
| 1,3-Dimethylimidazolium bis(trifluoromethylsulfonyl) amide      | 24.01 | 24.26 | -0.25 |
| 1,3-Dimethylimidazolium methosulfate                            | 17.75 | 17.76 | -0.01 |
| 1,3-Dimethylnaphthalene                                         | 21.28 | 21.45 | -0.17 |
| 1,3-Dinitropropane                                              | 10.87 | 10.90 | -0.03 |
| 1,3-Dioxane                                                     | 8.53  | 8.59  | -0.06 |
| 1,3-Dioxolan-2-one                                              | 6.61  | 6.78  | -0.17 |
| 1,3-Dioxolane                                                   | 6.68  | 6.76  | -0.08 |
| 1,3-Dipentyl-1,3-diphospha-2,4-dithiacyclobutane 1,3-dithioxide | 39.05 | 38.92 | 0.13  |
| 1,3-Diphenyl-1-butene                                           | 27.87 | 27.57 | 0.30  |
| 1,3-Diphenylpropane                                             | 25.57 | 25.83 | -0.26 |
| 1,3-Dipropylimidazolium bis(trifluoromethylsulfonyl) amide      | 31.60 | 31.57 | 0.03  |
| 1,3-Dithiolane                                                  | 11.40 | 11.71 | -0.31 |

|                                           |       |       |       |
|-------------------------------------------|-------|-------|-------|
| 1,3-Divinyl-1,1,3,3-tetramethyldisiloxane | 22.69 | 22.73 | -0.04 |
| 1,3-Pentadiyne                            | 8.52  | 8.62  | -0.10 |
| 1,3-Propanediamine                        | 9.11  | 9.07  | 0.04  |
| 1,3-Propanediol                           | 7.54  | 7.47  | 0.07  |
| 1,3-Propanediol diacetate                 | 14.99 | 15.08 | -0.09 |
| 1,4-Bis(3-aminopropoxy)butane             | 23.19 | 23.26 | -0.07 |
| 1,4-Bis(acetoxy)-2-butyne                 | 16.22 | 16.32 | -0.10 |
| 1,4-Bis(butanoyloxy)-2-butyne             | 23.55 | 23.67 | -0.12 |
| 1,4-Bis(dichloroboryl)butane              | 19.34 | 19.38 | -0.04 |
| 1,4-Bis(diethoxyboryl)butane              | 28.98 | 28.71 | 0.27  |
| 1,4-Bis(formoxy)-2-butyne                 | 12.60 | 12.76 | -0.16 |
| 1,4-Bis(heptanoyloxy)-2-butyne            | 34.62 | 34.68 | -0.06 |
| 1,4-Bis(hexanoyloxy)-2-butyne             | 30.92 | 31.01 | -0.09 |
| 1,4-Bis(propanoyloxy)-2-butyne            | 19.86 | 19.99 | -0.13 |
| 1,4-Bis(valeroyloxy)-2-butyne             | 27.23 | 27.34 | -0.11 |
| 1,4-Butanediol diacetate                  | 16.85 | 16.92 | -0.07 |
| 1,4-Butanediol diglycidyl ether           | 20.00 | 20.19 | -0.19 |
| 1,4-Butanediol dimethacrylate             | 23.79 | 24.07 | -0.28 |
| 1,4-Butanedithiol                         | 14.32 | 14.27 | 0.05  |
| 1,4-Cyclohexadiene                        | 10.51 | 10.85 | -0.34 |
| 1,4-Diaminobenzene                        | 13.80 | 13.74 | 0.06  |
| 1,4-Dibromo-2-butyne                      | 14.04 | 13.73 | 0.31  |
| 1,4-Dibromobutane                         | 14.22 | 14.33 | -0.11 |
| 1,4-Dibromopentane                        | 16.25 | 16.18 | 0.07  |
| 1,4-Dichloro-2-butyne                     | 11.51 | 11.40 | 0.11  |
| 1,4-Dichlorobenzene                       | 14.39 | 14.33 | 0.06  |
| 1,4-Dichlorobutane                        | 11.99 | 12.00 | -0.01 |
| 1,4-Dichloronaphthalene                   | 21.19 | 21.45 | -0.26 |
| 1,4-Diethylbenzene                        | 18.05 | 18.00 | 0.05  |
| 1,4-Difluorobenzene                       | 10.23 | 10.43 | -0.20 |
| 1,4-Difluorobutane                        | 8.07  | 8.13  | -0.06 |
| 1,4-Difluorooctachlorobutane              | 23.32 | 23.51 | -0.19 |
| 1,4-Dihydronaphthalene                    | 16.75 | 17.07 | -0.32 |
| 1,4-Dihydroxybenzene                      | 11.73 | 11.92 | -0.19 |
| 1,4-Diiodobutane                          | 18.33 | 18.40 | -0.07 |
| 1,4-Diisopropylbenzene                    | 21.70 | 21.64 | 0.06  |
| 1,4-Dimethyl-2-nitrobenzene               | 16.64 | 16.97 | -0.33 |
| 1,4-Dimethyl-2-propylpyrrolidine          | 17.91 | 18.00 | -0.09 |
| 1,4-Dimethylbenzene                       | 14.27 | 14.33 | -0.06 |
| 1,4-Dimethylnaphthalene                   | 21.20 | 21.45 | -0.25 |
| 1,4-Dimethylpiperazine                    | 14.07 | 14.07 | 0.00  |
| 1,4-Dioxane                               | 8.59  | 8.68  | -0.09 |

|                                             |       |       |       |
|---------------------------------------------|-------|-------|-------|
| 1,4-Dioxatetralin                           | 14.54 | 14.86 | -0.32 |
| 1,4-Divinylbenzene                          | 18.16 | 17.75 | 0.41  |
| 1,4-Oxathiane                               | 11.01 | 11.15 | -0.14 |
| 1,4-Pentadien-3-ol                          | 10.22 | 10.34 | -0.12 |
| 1,4-Pentadiene                              | 9.66  | 9.78  | -0.12 |
| 1,4-Pentanediol                             | 11.12 | 11.15 | -0.03 |
| 1,4-Piperazinedipropanamine                 | 24.07 | 24.10 | -0.03 |
| 1,5-Bis(diethoxyboryl)pentane               | 30.57 | 30.54 | 0.03  |
| 1,5-Diazabicyclo[4.3.0]non-5-ene            | 14.87 | 14.77 | 0.10  |
| 1,5-Dibromoheptane                          | 19.78 | 19.85 | -0.07 |
| 1,5-Dibromopentane                          | 16.11 | 16.16 | -0.05 |
| 1,5-Dibromoundecane                         | 27.53 | 27.19 | 0.34  |
| 1,5-Dichloropentane                         | 13.83 | 13.83 | 0.00  |
| 1,5-Difluoropentane                         | 9.93  | 9.96  | -0.03 |
| 1,5-Diiodopentane                           | 20.22 | 20.24 | -0.02 |
| 1,5-Dimethylcyclopentene                    | 12.70 | 12.78 | -0.08 |
| 1,5-Hexadiene                               | 11.58 | 11.61 | -0.03 |
| 1,5-Hexadiyne                               | 10.10 | 10.24 | -0.14 |
| 1,5-Pentanediamine                          | 12.78 | 12.74 | 0.04  |
| 1,5-Pentanediol                             | 11.18 | 11.14 | 0.04  |
| 1,5-Pentanediol diacetate                   | 18.57 | 18.75 | -0.18 |
| 1,5-Pentanedithiol                          | 16.15 | 16.11 | 0.04  |
| 1,6-Bis(diethoxyboryl)hexane                | 32.43 | 32.38 | 0.05  |
| 1,6-Dibromohexane                           | 17.91 | 18.00 | -0.09 |
| 1,6-Dichlorohexane                          | 15.64 | 15.67 | -0.03 |
| 1,6-Difluorohexane                          | 11.75 | 11.80 | -0.05 |
| 1,6-Diiodohexane                            | 22.03 | 22.07 | -0.04 |
| 1,6-Dimethyl-4-isopropyl-naphthalene        | 27.01 | 27.01 | 0.00  |
| 1,6-Dimethylnaphthalene                     | 21.61 | 21.45 | 0.16  |
| 1,6-Heptadiyne                              | 12.05 | 12.08 | -0.03 |
| 1,6-Hexamethylene diisocyanate              | 17.29 | 17.47 | -0.18 |
| 1,6-Hexanedioic acid                        | 13.07 | 13.13 | -0.06 |
| 1,6-Hexanediol bis(6-H-perfluoroheptanoate) | 40.34 | 40.36 | -0.02 |
| 1,6-Hexanediol bis(perfluorobutyrate)       | 28.95 | 28.75 | 0.20  |
| 1,6-Hexanediol bis(perfluorooctanoate)      | 44.61 | 44.64 | -0.03 |
| 1,6-Hexanedithiol                           | 17.96 | 17.94 | 0.02  |
| 1,7-Dibromo-3,3-dichloroheptane             | 23.61 | 23.65 | -0.04 |
| 1,7-Dibromoheptane                          | 19.76 | 19.83 | -0.07 |
| 1,7-Dichloroheptane                         | 17.52 | 17.50 | 0.02  |
| 1,7-Dichloronaphthalene                     | 21.45 | 21.45 | 0.00  |
| 1,7-Dimethylnaphthalene                     | 21.18 | 21.45 | -0.27 |
| 1,7-Heptanediol                             | 14.77 | 14.81 | -0.04 |

|                                       |       |       |       |
|---------------------------------------|-------|-------|-------|
| 1,7-Heptanedithiol                    | 19.57 | 19.78 | -0.21 |
| 1,7-Octadiene                         | 15.20 | 15.29 | -0.09 |
| 1,7-Octadiyne                         | 13.90 | 13.91 | -0.01 |
| 1,8-Cineole                           | 18.02 | 18.12 | -0.10 |
| 1,8-Diaminonaphthalene                | 21.10 | 20.86 | 0.24  |
| 1,8-Dibromooctane                     | 21.62 | 21.67 | -0.05 |
| 1,8-Dichloronaphthalene               | 21.33 | 21.45 | -0.12 |
| 1,8-Dichlorooctane                    | 19.30 | 19.34 | -0.04 |
| 1,8-Nonadiene                         | 16.94 | 17.12 | -0.18 |
| 1,8-Nonadiyne                         | 15.67 | 15.75 | -0.08 |
| 1,8-Octanedithiol                     | 21.65 | 21.61 | 0.04  |
| 1,9-Decadiene                         | 18.97 | 18.96 | 0.01  |
| 1,9-Dichlorononane                    | 20.99 | 21.17 | -0.18 |
| 1,9-Nonanedithiol                     | 23.34 | 23.45 | -0.11 |
| 1-[(2-Aminoethyl)amino]-2-propanol    | 13.38 | 13.28 | 0.10  |
| 10,11-Dipropyleicosane                | 48.35 | 48.54 | -0.19 |
| 10-Chloro-1-decanol                   | 21.64 | 21.66 | -0.02 |
| 10-Undecen-1-ol                       | 21.35 | 21.47 | -0.12 |
| 10-Undecenoic acid                    | 21.58 | 21.55 | 0.03  |
| 10-Undecenoyl chloride                | 23.05 | 23.08 | -0.03 |
| 11,12-Dipropyldocosane                | 52.25 | 52.21 | 0.04  |
| 11-Butyldocosane                      | 48.57 | 48.55 | 0.02  |
| 11-Decylheneicosane                   | 57.78 | 57.73 | 0.05  |
| 12-Tricosanone                        | 42.74 | 43.17 | -0.43 |
| 1a,2a,4b-1,2,4-Trimethylcyclopentane  | 14.79 | 14.64 | 0.15  |
| 1a,2b,4a-1,2,4-Trimethylcyclopentane  | 14.85 | 14.64 | 0.21  |
| 1-Acetoxy-2-ethyl-3-(2-furyl)propane  | 20.93 | 21.10 | -0.17 |
| 1-Acetoxy-2-ethyl-4-oxoheptane        | 21.60 | 21.82 | -0.22 |
| 1-Acetoxy-2-methyl-3-(2-furyl)propane | 19.11 | 19.27 | -0.16 |
| 1-Acetoxy-2-methyl-4-oxoheptane       | 19.82 | 19.99 | -0.17 |
| 1-Acetoxy-3-(2-furyl)propane          | 17.36 | 17.45 | -0.09 |
| 1-Acetoxy-3-oxa-5-oxooctane           | 18.75 | 18.84 | -0.09 |
| 1-Acetoxy-4-ethyl-3-oxa-5-oxooctane   | 22.35 | 22.51 | -0.16 |
| 1-Acetoxy-4-oxoheptane                | 18.02 | 18.17 | -0.15 |
| 1-Acetyl-3-methylpiperidine           | 16.22 | 16.16 | 0.06  |
| 1-Acetyl-4-piperidinone               | 14.42 | 14.44 | -0.02 |
| 1-Acetylnaphthalene                   | 21.45 | 21.48 | -0.03 |
| 1-Acetylpiperidine                    | 14.14 | 14.34 | -0.20 |
| 1-Allylcyclohexanol                   | 16.77 | 16.93 | -0.16 |
| 1-Amino-3-methoxypropane              | 10.65 | 10.21 | 0.44  |
| 1-Benzosuberone                       | 19.29 | 19.09 | 0.20  |

|                                                                    |       |       |       |
|--------------------------------------------------------------------|-------|-------|-------|
| 1-Benzyl-3-methylimidazolium<br>bis(trifluoromethylsulfonyl) amide | 34.03 | 33.98 | 0.05  |
| 1-Benzylpiperidine                                                 | 22.04 | 22.26 | -0.22 |
| 1-Benzylpyrrole                                                    | 19.95 | 19.96 | -0.01 |
| 1-Bromo-1,1,5-trichloropentane                                     | 18.87 | 18.88 | -0.01 |
| 1-Bromo-1-chloroethane                                             | 9.45  | 9.47  | -0.02 |
| 1-Bromo-1-chloropropane                                            | 11.31 | 11.30 | 0.01  |
| 1-Bromo-1-pentyne                                                  | 12.41 | 12.35 | 0.06  |
| 1-Bromo-2-(trifluoromethyl)benzene                                 | 15.38 | 15.54 | -0.16 |
| 1-Bromo-2,2-dimethylpropane                                        | 13.08 | 13.09 | -0.01 |
| 1-Bromo-2,4-dimethylbenzene                                        | 17.42 | 17.33 | 0.09  |
| 1-Bromo-2,5-dimethylbenzene                                        | 17.24 | 17.33 | -0.09 |
| 1-Bromo-2-butene                                                   | 11.42 | 11.18 | 0.24  |
| 1-Bromo-2-butoxyethylene                                           | 15.43 | 15.29 | 0.14  |
| 1-Bromo-2-chloro-1,1,2-trifluoroethane                             | 9.62  | 9.52  | 0.10  |
| 1-Bromo-2-chloroethane                                             | 9.46  | 9.49  | -0.03 |
| 1-Bromo-2-chloropropane                                            | 11.47 | 11.31 | 0.16  |
| 1-Bromo-2-ethoxyethane                                             | 11.65 | 11.93 | -0.28 |
| 1-Bromo-2-ethoxyethylene                                           | 11.78 | 11.61 | 0.17  |
| 1-Bromo-2-ethylbenzene                                             | 17.18 | 17.26 | -0.08 |
| 1-Bromo-2-fluorobenzene                                            | 13.46 | 13.48 | -0.02 |
| 1-Bromo-2-fluoroethane                                             | 7.53  | 7.56  | -0.03 |
| 1-Bromo-2-isopropylacetylene                                       | 12.29 | 12.33 | -0.04 |
| 1-Bromo-2-methoxyethane                                            | 10.08 | 10.08 | 0.00  |
| 1-Bromo-2-methylbutane                                             | 13.06 | 13.08 | -0.02 |
| 1-Bromo-2-methylpentane                                            | 15.11 | 14.91 | 0.20  |
| 1-Bromo-2-propanol                                                 | 10.04 | 9.99  | 0.05  |
| 1-Bromo-2-t-butylacetylene                                         | 14.15 | 14.18 | -0.03 |
| 1-Bromo-2-vinylbenzene                                             | 17.36 | 17.14 | 0.22  |
| 1-Bromo-3-(trifluoromethyl)benzene                                 | 15.48 | 15.54 | -0.06 |
| 1-Bromo-3,3-dichlorobutane                                         | 15.06 | 15.08 | -0.02 |
| 1-Bromo-3,4-dimethylbenzene                                        | 17.12 | 17.33 | -0.21 |
| 1-Bromo-3,5-dimethylbenzene                                        | 17.06 | 17.33 | -0.27 |
| 1-Bromo-3-chloropropane                                            | 11.23 | 11.33 | -0.10 |
| 1-Bromo-3-ethylbenzene                                             | 17.23 | 17.26 | -0.03 |
| 1-Bromo-3-fluorobenzene                                            | 13.58 | 13.48 | 0.10  |
| 1-Bromo-3-fluoropropane                                            | 9.36  | 9.39  | -0.03 |
| 1-Bromo-3-methyl-2-butene                                          | 13.28 | 13.04 | 0.24  |
| 1-Bromo-3-methylcyclohexane                                        | 16.23 | 15.92 | 0.31  |
| 1-Bromo-3-vinylbenzene                                             | 17.50 | 17.14 | 0.36  |
| 1-Bromo-4-(hexyloxy)benzene                                        | 25.44 | 25.29 | 0.15  |
| 1-Bromo-4-(trifluoromethyl)benzene                                 | 15.50 | 15.54 | -0.04 |

|                                                                          |       |       |       |
|--------------------------------------------------------------------------|-------|-------|-------|
| 1-Bromo-4-chlorobenzene                                                  | 15.41 | 15.43 | -0.02 |
| 1-Bromo-4-chlorobutane                                                   | 13.16 | 13.16 | 0.00  |
| 1-Bromo-4-ethoxybenzene                                                  | 18.09 | 17.95 | 0.14  |
| 1-Bromo-4-ethylbenzene                                                   | 17.21 | 17.26 | -0.05 |
| 1-Bromo-4-fluorobenzene                                                  | 13.47 | 13.48 | -0.01 |
| 1-Bromo-4-isopropylbenzene                                               | 19.32 | 19.08 | 0.24  |
| 1-Bromo-4-methylpentane                                                  | 15.02 | 14.91 | 0.11  |
| 1-Bromo-4-vinylbenzene                                                   | 17.62 | 17.14 | 0.48  |
| 1-Bromo-5,5-dichlorohexane                                               | 18.94 | 18.75 | 0.19  |
| 1-Bromo-6-fluorohexane                                                   | 14.89 | 14.90 | -0.01 |
| 1-Bromo-7,7-dichlorooctane                                               | 22.44 | 22.42 | 0.02  |
| 1-bromo-9-chloro-5-nonanone                                              | 22.27 | 22.44 | -0.17 |
| 1-Bromobutane                                                            | 11.22 | 11.26 | -0.04 |
| 1-Bromodecane                                                            | 22.26 | 22.27 | -0.01 |
| 1-Bromododecane                                                          | 25.94 | 25.94 | 0.00  |
| 1-Bromoheptadecane                                                       | 35.13 | 35.12 | 0.01  |
| 1-Bromohexadecane                                                        | 33.29 | 33.28 | 0.01  |
| 1-Bromonaphthalene                                                       | 20.45 | 20.64 | -0.19 |
| 1-Bromononane                                                            | 20.43 | 20.43 | 0.00  |
| 1-Bromooctadecane                                                        | 36.97 | 36.95 | 0.02  |
| 1-Bromooctane                                                            | 18.59 | 18.60 | -0.01 |
| 1-Bromopentadecane                                                       | 31.53 | 31.45 | 0.08  |
| 1-Bromopentane                                                           | 13.07 | 13.09 | -0.02 |
| 1-Bromopropane                                                           | 9.39  | 9.42  | -0.03 |
| 1-Bromotetradecane                                                       | 29.62 | 29.61 | 0.01  |
| 1-Bromotridecane                                                         | 27.79 | 27.78 | 0.01  |
| 1-Bromoundecane                                                          | 24.12 | 24.11 | 0.01  |
| 1-Butanethiol                                                            | 11.28 | 11.23 | 0.05  |
| 1-Butanol                                                                | 8.78  | 8.75  | 0.03  |
| 1-Butene                                                                 | 7.97  | 8.07  | -0.10 |
| 1-Butoxy-2-propanol                                                      | 14.94 | 14.93 | 0.01  |
| 1-Butoxy-4-methylbenzene                                                 | 20.70 | 20.52 | 0.18  |
| 1-Butoxycyclohexene                                                      | 18.80 | 18.83 | -0.03 |
| 1-Butyl-1-methylpiperidinium<br>bis(trifluoromethylsulfonyl)amide        | 32.30 | 32.31 | -0.01 |
| 1-Butyl-1-methylpyrrolidinium 2-acryloamido-2-<br>methylpropanesulfonate | 36.26 | 35.98 | 0.28  |
| 1-Butyl-1-methylpyrrolidinium acetate                                    | 21.80 | 22.09 | -0.29 |
| 1-Butyl-1-methylpyrrolidinium<br>bis(trifluoromethylsulfonyl)amide       | 30.48 | 30.47 | 0.01  |
| 1-Butyl-1-methylpyrrolidinium dicyanamide                                | 23.83 | 23.56 | 0.27  |
| 1-Butyl-1-methylpyrrolidinium methylsulfate                              | 24.15 | 23.97 | 0.18  |



|                                                                        |       |       |       |
|------------------------------------------------------------------------|-------|-------|-------|
| 1-Butyl-1-methylpyrrolidinium<br>trifluoromethanesulfonate             | 23.96 | 23.81 | 0.15  |
| 1-Butyl-2,3-dimethylimidazolium<br>bis(trifluoromethanesulfonyl) amide | 31.45 | 31.47 | -0.02 |
| 1-Butyl-2,3-dimethylimidazolium tetrafluoroborate                      | 20.76 | 20.68 | 0.08  |
| 1-Butyl-2-methylpyridinium tetrafluoroborate                           | 21.19 | 21.24 | -0.05 |
| 1-Butyl-2-pyridone                                                     | 18.12 | 17.68 | 0.44  |
| 1-Butyl-3-(2-cyanoethyl)-imidazolium chloride                          | 22.96 | 23.09 | -0.13 |
| 1-Butyl-3-(2-cyanoethyl)imidazolium thiocyanate                        | 26.58 | 26.60 | -0.02 |
| 1-Butyl-3-ethylimidazolium<br>bis(trifluoromethylsulfonyl) amide       | 31.49 | 31.57 | -0.08 |
| 1-Butyl-3-ethylimidazolium triflate                                    | 24.98 | 24.91 | 0.07  |
| 1-Butyl-3-methylimidazolium 2-acryloamido-2-<br>methylpropanesulfonate | 35.09 | 35.26 | -0.17 |
| 1-Butyl-3-methylimidazolium acetate                                    | 21.48 | 21.37 | 0.11  |
| 1-Butyl-3-methylimidazolium<br>bis(perfluorobutanesulfonyl) amide      | 41.78 | 41.80 | -0.02 |
| 1-Butyl-3-methylimidazolium<br>bis(trifluoromethanesulfonyl) amide     | 29.73 | 29.75 | -0.02 |
| 1-Butyl-3-methylimidazolium dicyanoamide                               | 22.91 | 22.84 | 0.07  |
| 1-Butyl-3-methylimidazolium glycine                                    | 23.15 | 22.73 | 0.42  |
| 1-Butyl-3-methylimidazolium hexafluorophosphate                        | 20.40 | 20.44 | -0.04 |
| 1-Butyl-3-methylimidazolium methosulfate                               | 23.22 | 23.25 | -0.03 |
| 1-Butyl-3-methylimidazolium octylsulfate                               | 36.27 | 36.11 | 0.16  |
| 1-Butyl-3-methylimidazolium perfluorobutylsulfonate                    | 29.07 | 29.11 | -0.04 |
| 1-Butyl-3-methylimidazolium tetracyanoborate                           | 26.89 | 26.90 | -0.01 |
| 1-Butyl-3-methylimidazolium tetrafluoroborate                          | 18.95 | 18.96 | -0.01 |
| 1-Butyl-3-methylimidazolium thiocyanate                                | 22.91 | 23.03 | -0.12 |
| 1-Butyl-3-methylimidazolium threoninate                                | 27.15 | 26.94 | 0.21  |
| 1-Butyl-3-methylimidazolium tricyanomethanide                          | 25.90 | 25.92 | -0.02 |
| 1-Butyl-3-methylimidazolium<br>trifluoromethylsulfonate                | 22.96 | 23.09 | -0.13 |
| 1-Butyl-4-methylpyridinium tetrafluoroborate                           | 21.41 | 21.34 | 0.07  |
| 1-Butylamine                                                           | 9.55  | 9.55  | 0.00  |
| 1-Butylnaphthalene                                                     | 25.03 | 25.04 | -0.01 |
| 1-Butylphosphine                                                       | 12.17 | 12.15 | 0.02  |
| 1-Butylpyridinium 2-acryloamido-2-<br>methylpropanesulfonate           | 36.08 | 35.74 | 0.34  |
| 1-Butylpyridinium bis(fluorosulfonyl) amide                            | 25.61 | 25.63 | -0.02 |
| 1-Butylpyridinium dicyanamide                                          | 23.34 | 23.31 | 0.03  |
| 1-Butylpyridinium tetrafluoroborate                                    | 19.42 | 19.44 | -0.02 |
| 1-Butyltetrahydrothiophenium dicyanamide                               | 23.62 | 23.71 | -0.09 |
| 1-Chloro-1,2-epoxycyclohexane                                          | 12.97 | 12.91 | 0.06  |

|                                             |       |       |       |
|---------------------------------------------|-------|-------|-------|
| 1-Chloro-1,2-epoxycyclopentane              | 11.02 | 11.07 | -0.05 |
| 1-Chloro-1,3-butadiene                      | 10.22 | 9.85  | 0.37  |
| 1-Chloro-1-ethoxyethane                     | 10.93 | 10.81 | 0.12  |
| 1-Chloro-1-phenyl-2-propene                 | 17.83 | 17.85 | -0.02 |
| 1-Chloro-2-(methylthio)ethane               | 11.29 | 11.31 | -0.02 |
| 1-Chloro-2-(trichloromethyl)benzene         | 20.07 | 20.16 | -0.09 |
| 1-Chloro-2,2-difluoropropane                | 8.18  | 8.41  | -0.23 |
| 1-Chloro-2,2-dimethylpropane                | 11.94 | 11.92 | 0.02  |
| 1-Chloro-2,3-epoxycyclohexane               | 12.85 | 12.73 | 0.12  |
| 1-Chloro-2,3-epoxycyclopentane              | 11.04 | 10.89 | 0.15  |
| 1-Chloro-2,4-bis(trifluoromethyl)benzene    | 16.20 | 16.46 | -0.26 |
| 1-Chloro-2,4-dinitrobenzene                 | 17.98 | 17.71 | 0.27  |
| 1-Chloro-2-butanol                          | 10.62 | 10.66 | -0.04 |
| 1-Chloro-2-butyne                           | 9.43  | 9.50  | -0.07 |
| 1-Chloro-2-fluorobenzene                    | 12.27 | 12.38 | -0.11 |
| 1-Chloro-2-fluoroethane                     | 6.41  | 6.39  | 0.02  |
| 1-Chloro-2-isopropylbenzene                 | 17.93 | 17.98 | -0.05 |
| 1-Chloro-2-methoxyethane                    | 9.00  | 8.92  | 0.08  |
| 1-Chloro-2-methyl-1-propene                 | 9.93  | 10.00 | -0.07 |
| 1-Chloro-2-nitro-4-(trifluoromethyl)benzene | 17.09 | 17.08 | 0.01  |
| 1-Chloro-2-phenylethane                     | 16.05 | 16.16 | -0.11 |
| 1-Chloro-2-propanol                         | 8.86  | 8.82  | 0.04  |
| 1-Chloro-3-(1-methylethoxy)-2-propanol      | 14.53 | 15.00 | -0.47 |
| 1-Chloro-3-(trifluoromethyl)benzene         | 14.28 | 14.44 | -0.16 |
| 1-Chloro-3-ethylbenzene                     | 16.08 | 16.17 | -0.09 |
| 1-Chloro-3-fluoro-2-methylbenzene           | 14.21 | 14.29 | -0.08 |
| 1-Chloro-3-fluorobenzene                    | 12.28 | 12.38 | -0.10 |
| 1-Chloro-3-iodopropane                      | 13.50 | 13.36 | 0.14  |
| 1-Chloro-3-methyl-2-butene                  | 11.98 | 11.88 | 0.10  |
| 1-Chloro-4-((chloromethyl)thio)benzene      | 19.60 | 19.53 | 0.07  |
| 1-Chloro-4-(trifluoromethyl)benzene         | 14.23 | 14.44 | -0.21 |
| 1-Chloro-4-ethoxybenzene                    | 16.91 | 16.85 | 0.06  |
| 1-Chloro-4-fluorobutane                     | 10.05 | 10.06 | -0.01 |
| 1-Chloro-4-iodobutane                       | 15.22 | 15.20 | 0.02  |
| 1-Chloro-4-isopropylbenzene                 | 18.01 | 17.98 | 0.03  |
| 1-Chloro-4-nitro-2-(trifluoromethyl)benzene | 17.46 | 17.08 | 0.38  |
| 1-Chloro-4-tert-butylbenzene                | 19.92 | 19.83 | 0.09  |
| 1-Chloro-5-fluoropentane                    | 11.90 | 11.90 | 0.00  |
| 1-Chlorobut-1-yn-3-ene                      | 9.47  | 9.62  | -0.15 |
| 1-Chlorobutane                              | 10.10 | 10.09 | 0.01  |
| 1-Chlorocyclohexene                         | 12.66 | 12.88 | -0.22 |
| 1-Chlorodecane                              | 21.15 | 21.10 | 0.05  |

|                                                                      |       |       |       |
|----------------------------------------------------------------------|-------|-------|-------|
| 1-Chlorododecane                                                     | 24.83 | 24.77 | 0.06  |
| 1-Chloroheptane                                                      | 15.62 | 15.60 | 0.02  |
| 1-Chlorohexadecane                                                   | 32.20 | 32.12 | 0.08  |
| 1-Chlorohexane                                                       | 13.78 | 13.76 | 0.02  |
| 1-Chloronaphthalene                                                  | 19.37 | 19.54 | -0.17 |
| 1-Chlorononane                                                       | 19.13 | 19.27 | -0.14 |
| 1-Chlorooctadecane                                                   | 35.89 | 35.79 | 0.10  |
| 1-Chlorooctane                                                       | 17.46 | 17.43 | 0.03  |
| 1-Chloropentane                                                      | 11.94 | 11.93 | 0.01  |
| 1-Chloropropane                                                      | 8.25  | 8.26  | -0.01 |
| 1-Chlorotetradecane                                                  | 28.52 | 28.45 | 0.07  |
| 1-Crotyl-2-pyridone                                                  | 17.98 | 17.60 | 0.38  |
| 1-Cyanonaphthalene                                                   | 19.49 | 19.46 | 0.03  |
| 1-Cyclohexene-1-carboxaldehyde                                       | 13.26 | 13.00 | 0.26  |
| 1-Cyclohexene-1-carboxylic acid                                      | 13.04 | 13.43 | -0.39 |
| 1-Cyclohexyl-4-hexyldecane                                           | 40.37 | 40.35 | 0.02  |
| 1-Cyclopentene-1-carboxaldehyde                                      | 11.30 | 11.17 | 0.13  |
| 1-Cyclopropyl-1,4-cyclohexadiene                                     | 15.37 | 15.52 | -0.15 |
| 1-Cyclopropylcyclohexene                                             | 15.74 | 15.60 | 0.14  |
| 1-Decanethiol                                                        | 22.12 | 22.24 | -0.12 |
| 1-Decen-3-yne                                                        | 18.78 | 18.48 | 0.30  |
| 1-Decene                                                             | 19.05 | 19.08 | -0.03 |
| 1-Decyl hydroperoxide                                                | 20.81 | 20.68 | 0.13  |
| 1-Decyl-3-methylimidazolium<br>bis(trifluoromethanesulfonyl) amide   | 40.79 | 40.76 | 0.03  |
| 1-Decyl-3-methylimidazolium tetracyanoborate                         | 37.92 | 37.92 | 0.00  |
| 1-Decyl-3-methylimidazolium tricyanomethanide                        | 36.96 | 36.93 | 0.03  |
| 1-Decylnaphthalene                                                   | 36.01 | 36.06 | -0.05 |
| 1-Decylphosphine                                                     | 23.14 | 23.16 | -0.02 |
| 1-Decyne                                                             | 18.36 | 18.39 | -0.03 |
| 1-Dimethylamino-2-propyne                                            | 10.69 | 10.76 | -0.07 |
| 1-Docosanoic acid                                                    | 42.16 | 41.86 | 0.30  |
| 1-Dodecanol                                                          | 23.51 | 23.43 | 0.08  |
| 1-Dodecen-3-yne                                                      | 22.48 | 22.15 | 0.33  |
| 1-Dodecene                                                           | 22.73 | 22.75 | -0.02 |
| 1-Dodecyl-2-methylcyclohexane                                        | 34.93 | 34.84 | 0.09  |
| 1-Dodecyl-3-methylcyclohexane                                        | 35.02 | 34.84 | 0.18  |
| 1-Dodecyl-3-methylimidazolium<br>bis(trifluoromethanesulfonyl) amide | 44.43 | 44.43 | 0.00  |
| 1-Dodecylphosphine                                                   | 26.65 | 26.83 | -0.18 |
| 1-Dodecylpiperidine                                                  | 32.77 | 32.71 | 0.06  |
| 1-Dodecyne                                                           | 22.04 | 22.06 | -0.02 |

|                                                                        |       |       |       |
|------------------------------------------------------------------------|-------|-------|-------|
| 1-Eicosene                                                             | 37.48 | 37.43 | 0.05  |
| 1-Ethoxy-1,1,2,2-tetrafluoroethane                                     | 8.88  | 9.16  | -0.28 |
| 1-Ethoxy-2-nitrobenzene                                                | 17.53 | 17.59 | -0.06 |
| 1-Ethoxycyclohexene                                                    | 14.94 | 15.16 | -0.22 |
| 1-Ethoxynaphthalene                                                    | 21.89 | 22.06 | -0.17 |
| 1-Ethyl-1H-pyrrole                                                     | 11.98 | 12.06 | -0.08 |
| 1-Ethyl-1-methylcyclopentane                                           | 14.71 | 14.67 | 0.04  |
| 1-Ethyl-1-methylcyclopropane                                           | 11.32 | 11.00 | 0.32  |
| 1-Ethyl-1-phenylhydrazine                                              | 17.43 | 17.25 | 0.18  |
| 1-Ethyl-2,3-dimethylimidazolium<br>bis(trifluoromethanesulfonyl) amide | 27.72 | 27.80 | -0.08 |
| 1-Ethyl-2,4,5-trimethylbenzene                                         | 19.82 | 19.97 | -0.15 |
| 1-Ethyl-2-isopropylbenzene                                             | 19.73 | 19.82 | -0.09 |
| 1-Ethyl-2-propyn-1-ylether                                             | 9.80  | 9.89  | -0.09 |
| 1-Ethyl-2-pyrrolidinemethanamine                                       | 15.88 | 15.69 | 0.19  |
| 1-Ethyl-3-methylimidazolium 1,1,2,2-<br>tetrafluoroethanesulfonate     | 21.37 | 21.31 | 0.06  |
| 1-Ethyl-3-methylimidazolium acetate                                    | 17.82 | 17.70 | 0.12  |
| 1-Ethyl-3-methylimidazolium aminoacetate                               | 18.90 | 19.06 | -0.16 |
| 1-Ethyl-3-methylimidazolium<br>bis(trifluoromethanesulfonyl) amide     | 26.07 | 26.08 | -0.01 |
| 1-Ethyl-3-methylimidazolium dicyanamide                                | 19.17 | 19.17 | 0.00  |
| 1-Ethyl-3-methylimidazolium diethylphosphate                           | 25.59 | 25.51 | 0.08  |
| 1-Ethyl-3-methylimidazolium dimethylphosphate                          | 21.87 | 21.81 | 0.06  |
| 1-Ethyl-3-methylimidazolium ethosulfate                                | 21.47 | 21.43 | 0.04  |
| 1-Ethyl-3-methylimidazolium imidodisulfurylfluoride                    | 21.43 | 21.48 | -0.05 |
| 1-Ethyl-3-methylimidazolium L-alanine                                  | 20.65 | 20.87 | -0.22 |
| 1-Ethyl-3-methylimidazolium L-proline                                  | 23.32 | 23.67 | -0.35 |
| 1-Ethyl-3-methylimidazolium L-serine                                   | 21.43 | 21.43 | 0.00  |
| 1-Ethyl-3-methylimidazolium methanesulfonate                           | 19.21 | 19.30 | -0.09 |
| 1-Ethyl-3-methylimidazolium methylsulfate                              | 19.27 | 19.58 | -0.31 |
| 1-Ethyl-3-methylimidazolium taurinate                                  | 22.36 | 22.58 | -0.22 |
| 1-Ethyl-3-methylimidazolium tetracyanoborate                           | 23.30 | 23.23 | 0.07  |
| 1-Ethyl-3-methylimidazolium tetrafluoroborate                          | 15.34 | 15.29 | 0.05  |
| 1-Ethyl-3-methylimidazolium thiocyanate                                | 19.15 | 19.36 | -0.21 |
| 1-Ethyl-3-methylimidazolium threoninate                                | 23.33 | 23.26 | 0.07  |
| 1-Ethyl-3-methylimidazolium tricyanomethide                            | 22.15 | 22.25 | -0.10 |
| 1-Ethyl-3-methylimidazolium<br>trifluoromethylsulfonate                | 19.39 | 19.42 | -0.03 |
| 1-Ethyl-3-methylpyridinium bis(fluorosulfonyl)<br>amide                | 23.85 | 23.86 | -0.01 |
| 1-Ethyl-3-methylpyridinium ethylsulfate                                | 23.86 | 23.81 | 0.05  |

|                                                                     |       |       |       |
|---------------------------------------------------------------------|-------|-------|-------|
| 1-Ethyl-3-propylimidazolium<br>bis(trifluoromethanesulfonyl) amide  | 29.71 | 29.73 | -0.02 |
| 1-Ethyl-4-methoxybenzene                                            | 16.83 | 16.84 | -0.01 |
| 1-Ethyladamantane                                                   | 20.24 | 20.27 | -0.03 |
| 1-Ethylcyclohexene                                                  | 14.54 | 14.63 | -0.09 |
| 1-Ethylcyclopentene                                                 | 12.69 | 12.80 | -0.11 |
| 1-Ethylmorpholinium tetrafluoroborate                               | 16.18 | 15.81 | 0.37  |
| 1-Ethyl-naphthalene                                                 | 21.19 | 21.37 | -0.18 |
| 1-Ethylpiperidine                                                   | 14.58 | 14.36 | 0.22  |
| 1-Ethylpyridinium bis(fluorosulfonyl) amide                         | 21.87 | 21.96 | -0.09 |
| 1-Ethylpyridinium ethylsulfate                                      | 21.92 | 21.90 | 0.02  |
| 1-Ethylpyridinium triflate                                          | 19.84 | 19.89 | -0.05 |
| 1-Ethyltetrahydrothiophenium dicyanamide                            | 20.16 | 20.04 | 0.12  |
| 1-Ethynylcyclohexanamine                                            | 15.24 | 15.21 | 0.03  |
| 1-Ethynylcyclohexanol                                               | 14.22 | 14.41 | -0.19 |
| 1-Ethynylcyclopentanol                                              | 12.78 | 12.58 | 0.20  |
| 1-Fluoro-2-(trichloromethyl)benzene                                 | 18.36 | 18.21 | 0.15  |
| 1-Fluoro-4-(trifluoromethyl)benzene                                 | 12.26 | 12.49 | -0.23 |
| 1-Fluorobutane                                                      | 8.11  | 8.16  | -0.05 |
| 1-Fluorodecane                                                      | 19.15 | 19.17 | -0.02 |
| 1-Fluorododecane                                                    | 22.83 | 22.84 | -0.01 |
| 1-Fluoroheptane                                                     | 13.63 | 13.66 | -0.03 |
| 1-Fluorohexane                                                      | 11.79 | 11.83 | -0.04 |
| 1-Fluoronaphthalene                                                 | 17.33 | 17.59 | -0.26 |
| 1-Fluorononane                                                      | 17.34 | 17.33 | 0.01  |
| 1-Fluorooctane                                                      | 15.47 | 15.50 | -0.03 |
| 1-Fluoropentane                                                     | 9.95  | 9.99  | -0.04 |
| 1-Fluoropropane                                                     | 6.27  | 6.32  | -0.05 |
| 1-Fluorotetradecane                                                 | 26.57 | 26.51 | 0.06  |
| 1-Fluoroundecane                                                    | 21.00 | 21.01 | -0.01 |
| 1-Formyl-naphthalene                                                | 19.65 | 19.74 | -0.09 |
| 1-Formylpiperidine                                                  | 12.55 | 12.56 | -0.01 |
| 1-Heptadecene                                                       | 31.93 | 31.93 | 0.00  |
| 1-Heptadecylamine                                                   | 33.42 | 33.41 | 0.01  |
| 1-Heptanethiol                                                      | 16.79 | 16.74 | 0.05  |
| 1-Heptanol                                                          | 14.33 | 14.25 | 0.08  |
| 1-Hepten-3-yne                                                      | 13.28 | 12.98 | 0.30  |
| 1-Hepten-4-ol                                                       | 14.08 | 14.14 | -0.06 |
| 1-Heptene                                                           | 13.53 | 13.57 | -0.04 |
| 1-Heptyl-3-methylimidazolium<br>bis(trifluoromethanesulfonyl) amide | 34.94 | 35.26 | -0.32 |
| 1-Heptyl-3-methylimidazolium hexafluorophosphate                    | 25.94 | 25.94 | 0.00  |

|                                                                      |       |       |       |
|----------------------------------------------------------------------|-------|-------|-------|
| 1-Heptylhydroperoxide                                                | 15.21 | 15.18 | 0.03  |
| 1-Heptylnaphthalene                                                  | 30.50 | 30.55 | -0.05 |
| 1-Heptyltrifluorosilane                                              | 16.38 | 16.28 | 0.10  |
| 1-Heptyne                                                            | 12.86 | 12.89 | -0.03 |
| 1-Hexadecylphosphine                                                 | 34.19 | 34.17 | 0.02  |
| 1-Hexadecyne                                                         | 29.40 | 29.40 | 0.00  |
| 1-Hexanethiol                                                        | 14.94 | 14.90 | 0.04  |
| 1-Hexanol                                                            | 12.54 | 12.42 | 0.12  |
| 1-Hexen-3-ol                                                         | 12.29 | 12.30 | -0.01 |
| 1-Hexen-3-yne                                                        | 11.44 | 11.14 | 0.30  |
| 1-Hexen-5-one                                                        | 11.77 | 11.84 | -0.07 |
| 1-Hexene                                                             | 11.70 | 11.74 | -0.04 |
| 1-Hexyl-1,2,3,4-tetrahydronaphthalene                                | 28.08 | 28.14 | -0.06 |
| 1-Hexyl-1-methylpyrrolidinium<br>bis(trifluoromethanesulfonyl) amide | 34.59 | 34.14 | 0.45  |
| 1-Hexyl-3,5-dimethylpyridinium<br>bis(trifluoromethylsulfonyl)amide  | 37.88 | 37.71 | 0.17  |
| 1-Hexyl-3-methylimidazolium acetate                                  | 25.19 | 25.04 | 0.15  |
| 1-Hexyl-3-methylimidazolium<br>bis(trifluoromethanesulfonyl) amide   | 33.39 | 33.42 | -0.03 |
| 1-Hexyl-3-methylimidazolium chloride                                 | 23.31 | 23.19 | 0.12  |
| 1-Hexyl-3-methylimidazolium dicyanoamide                             | 26.63 | 26.51 | 0.12  |
| 1-Hexyl-3-methylimidazolium hexafluorophosphate                      | 24.06 | 24.11 | -0.05 |
| 1-Hexyl-3-methylimidazolium tetracyanoborate                         | 30.48 | 30.57 | -0.09 |
| 1-Hexyl-3-methylimidazolium tetrafluoroborate                        | 22.56 | 22.63 | -0.07 |
| 1-Hexyl-3-methylimidazolium thiocyanate                              | 27.02 | 26.70 | 0.32  |
| 1-Hexyl-3-methylimidazolium tricyanomethanide                        | 29.60 | 29.59 | 0.01  |
| 1-Hexylhydroperoxide                                                 | 13.33 | 13.34 | -0.01 |
| 1-Hexyl-naphthalene                                                  | 28.65 | 28.72 | -0.07 |
| 1-Hexylphosphine                                                     | 15.86 | 15.82 | 0.04  |
| 1-Hexylpyridinium bis(fluorosulfonyl) amide                          | 29.31 | 29.30 | 0.01  |
| 1-Hexyn-3-ol                                                         | 11.64 | 11.61 | 0.03  |
| 1-Hexyne                                                             | 11.00 | 11.05 | -0.05 |
| 1H-Pentadecafluoroheptane                                            | 14.38 | 14.52 | -0.14 |
| 1H-Pyrazole                                                          | 7.23  | 7.36  | -0.13 |
| 1-Hydroxy-2-butanone                                                 | 8.59  | 8.86  | -0.27 |
| 1-Hydroxycyclohexanecarbonitrile                                     | 13.59 | 13.30 | 0.29  |
| 1-Hydroxytetralin                                                    | 17.37 | 17.71 | -0.34 |
| 1-Indanamine                                                         | 16.48 | 16.64 | -0.16 |
| 1-Indanone                                                           | 15.50 | 15.42 | 0.08  |
| 1-Iodo-2,2-dimethylpropane                                           | 15.17 | 15.12 | 0.05  |
| 1-Iodo-2,4-dimethylbenzene                                           | 19.35 | 19.31 | 0.04  |

|                                                                       |       |       |       |
|-----------------------------------------------------------------------|-------|-------|-------|
| 1-Iodo-2,5-dimethylbenzene                                            | 19.44 | 19.31 | 0.13  |
| 1-Iodo-2,6-dimethylbenzene                                            | 19.57 | 19.31 | 0.26  |
| 1-Iodo-2-triazobenzene                                                | 19.05 | 18.97 | 0.08  |
| 1-Iodobutane                                                          | 13.28 | 13.30 | -0.02 |
| 1-Iododecane                                                          | 24.24 | 24.31 | -0.07 |
| 1-Iodododecane                                                        | 27.98 | 27.98 | 0.00  |
| 1-Iodoheptafluoropropane                                              | 11.51 | 11.69 | -0.18 |
| 1-Iodoheptane                                                         | 18.80 | 18.80 | 0.00  |
| 1-Iodohexadecane                                                      | 35.48 | 35.32 | 0.16  |
| 1-Iodohexane                                                          | 16.96 | 16.97 | -0.01 |
| 1-Iodonaphthalene                                                     | 22.44 | 22.61 | -0.17 |
| 1-Iodononane                                                          | 22.49 | 22.47 | 0.02  |
| 1-Iodooctadecane                                                      | 39.03 | 38.99 | 0.04  |
| 1-Iodooctane                                                          | 20.64 | 20.64 | 0.00  |
| 1-Iodopentane                                                         | 15.12 | 15.13 | -0.01 |
| 1-Isoamyloxycyclohexene                                               | 20.64 | 20.65 | -0.01 |
| 1-Isobutyl-1-methylpyrrolidinium<br>bis(trifluoromethylsulfonyl)amide | 30.53 | 30.46 | 0.07  |
| 1-Isobutyl-3-methylimidazolium<br>bis(trifluoromethanesulfonyl) amide | 29.70 | 29.73 | -0.03 |
| 1-Isobutyl-3-methylpyridinium<br>bis(trifluoromethylsulfonyl)amide    | 32.20 | 32.12 | 0.08  |
| 1-Isopropoxy-2-propanol                                               | 13.12 | 13.10 | 0.02  |
| 1-Isopropyl-4-nitrobenzene                                            | 18.86 | 18.72 | 0.14  |
| 1-Isopropylnaphthalene                                                | 23.04 | 23.19 | -0.15 |
| 1-Methoxy-2-crotyl-4-methylbenzene                                    | 22.36 | 22.34 | 0.02  |
| 1-Methoxy-2-methyl-4,6-dicrotylbenzene                                | 29.40 | 29.67 | -0.27 |
| 1-Methoxy-2-methyl-4-crotylbenzene                                    | 22.31 | 22.34 | -0.03 |
| 1-Methoxy-2-propanol                                                  | 9.07  | 9.41  | -0.34 |
| 1-Methoxy-2-propanone                                                 | 8.79  | 8.95  | -0.16 |
| 1-Methoxy-4-methyl-2,6-di(3-hexen-2-yl)benzene                        | 36.95 | 36.98 | -0.03 |
| 1-Methoxy-4-Methyl-2,6-dicrotylbenzene                                | 29.50 | 29.67 | -0.17 |
| 1-Methoxy-4-propylbenzene                                             | 18.66 | 18.67 | -0.01 |
| 1-Methoxy-5-heptanol                                                  | 16.72 | 16.75 | -0.03 |
| 1-Methoxy-5-undecanol                                                 | 24.09 | 24.09 | 0.00  |
| 1-Methoxybut-1-yn-3-ene                                               | 10.24 | 10.01 | 0.23  |
| 1-Methoxycyclohexene                                                  | 13.24 | 13.32 | -0.08 |
| 1-Methoxynaphthalene                                                  | 20.18 | 20.22 | -0.04 |
| 1-Methyl-1-(2',3'-epoxypropyl)-2-oxopyrrolidinium<br>chloride         | 19.57 | 19.74 | -0.17 |
| 1-Methyl-1,3-cyclopentadiene                                          | 10.56 | 10.88 | -0.32 |
| 1-Methyl-1-butylhydrazine                                             | 12.95 | 12.92 | 0.03  |

|                                                                       |       |       |       |
|-----------------------------------------------------------------------|-------|-------|-------|
| 1-Methyl-1-decylpyrrolidinium<br>bis(trifluoromethanesulfonyl) amide  | 41.58 | 41.48 | 0.10  |
| 1-Methyl-1H-indene                                                    | 17.24 | 17.05 | 0.19  |
| 1-Methyl-1H-pyrazole                                                  | 9.29  | 9.42  | -0.13 |
| 1-Methyl-1-isobutylhydrazine                                          | 12.95 | 12.90 | 0.05  |
| 1-Methyl-1-isopropylhydrazine                                         | 11.00 | 11.06 | -0.06 |
| 1-Methyl-1-phenylhydrazine                                            | 15.25 | 15.43 | -0.18 |
| 1-Methyl-1-propylhydrazine                                            | 11.09 | 11.08 | 0.01  |
| 1-Methyl-1-propylpiperidinium<br>bis(trifluoromethylsulfonyl)amide    | 30.48 | 30.47 | 0.01  |
| 1-Methyl-1-propylpyrrolidinium bis(fluorosulfonyl)<br>amide           | 24.20 | 24.04 | 0.16  |
| 1-Methyl-1-propylpyrrolidinium<br>bis(trifluoromethanesulfonyl) amide | 28.74 | 28.64 | 0.10  |
| 1-Methyl-2-ethyl-5-propylpyrrole                                      | 19.36 | 19.40 | -0.04 |
| 1-Methyl-2-ethyl-5-propylpyrrolidine                                  | 19.64 | 19.83 | -0.19 |
| 1-Methyl-2-piperidone                                                 | 12.46 | 12.52 | -0.06 |
| 1-Methyl-2-propyl-4-ethylpyrrole                                      | 19.51 | 19.44 | 0.07  |
| 1-Methyl-2-propyl-4-ethyl-pyrrolidine                                 | 19.80 | 19.84 | -0.04 |
| 1-Methyl-2-pyrrolidonium tetrafluoroborate                            | 14.68 | 14.94 | -0.26 |
| 1-Methyl-3-hexylimidazolium threoninate                               | 30.81 | 30.61 | 0.20  |
| 1-Methyl-3-pentylimidazolium threoninate                              | 28.96 | 28.77 | 0.19  |
| 1-Methyl-3-phenoxybenzene                                             | 22.89 | 22.93 | -0.04 |
| 1-Methyl-3-phenylpropylamine                                          | 19.21 | 19.26 | -0.05 |
| 1-Methyl-3-piperidinol                                                | 13.28 | 13.10 | 0.18  |
| 1-Methyl-3-propylimidazolium threoninate                              | 25.27 | 25.10 | 0.17  |
| 1-Methyl-4-(1-methylvinyl)benzene                                     | 18.07 | 17.90 | 0.17  |
| 1-Methyl-4-(1-pentenyl-2-oxy)benzene                                  | 22.15 | 22.24 | -0.09 |
| 1-Methyl-4-(phenylthio)benzene                                        | 25.47 | 25.46 | 0.01  |
| 1-Methyl-4-benzylbenzene                                              | 23.80 | 24.06 | -0.26 |
| 1-Methyl-4-cyclopropyl-1,4-cyclohexadiene                             | 17.24 | 17.39 | -0.15 |
| 1-Methyl-4-isopropyl-2-nitrobenzene                                   | 20.43 | 20.62 | -0.19 |
| 1-Methyl-4-isopropyl-7-oxabicyclo[2.2.1]heptane                       | 18.48 | 18.12 | 0.36  |
| 1-Methyl-4-isopropylcyclohexanol                                      | 18.92 | 18.86 | 0.06  |
| 1-Methyl-4-isopropylcyclohexene                                       | 18.19 | 18.27 | -0.08 |
| 1-Methyl-4-piperidone                                                 | 12.61 | 12.65 | -0.04 |
| 1-Methyl-4-vinylcyclohexene                                           | 15.90 | 16.33 | -0.43 |
| 1-Methylanthracene                                                    | 26.45 | 26.66 | -0.21 |
| 1-Methylbenzimidazole                                                 | 16.12 | 16.27 | -0.15 |
| 1-Methylcyclohexanol                                                  | 13.47 | 13.39 | 0.08  |
| 1-Methylcyclohexene                                                   | 12.65 | 12.80 | -0.15 |
| 1-Methylcyclopentanol                                                 | 11.64 | 11.55 | 0.09  |



|                                                                    |       |       |       |
|--------------------------------------------------------------------|-------|-------|-------|
| 1-Methylcyclopentene                                               | 10.90 | 10.96 | -0.06 |
| 1-Methylimidazole                                                  | 9.22  | 9.23  | -0.01 |
| 1-Methylmorpholinium tetrafluoroborate                             | 14.23 | 14.10 | 0.13  |
| 1-Methylnaphthalene                                                | 19.30 | 19.54 | -0.24 |
| 1-Methylpiperidinium tetrafluoroborate                             | 15.00 | 15.27 | -0.27 |
| 1-Methylpyridinium methylsulfate                                   | 18.25 | 18.34 | -0.09 |
| 1-Methylpyrrole                                                    | 10.12 | 10.24 | -0.12 |
| 1-Methylpyrrolidinium tetrafluoroborate                            | 13.70 | 13.43 | 0.27  |
| 1-Methyltetralin                                                   | 18.84 | 18.97 | -0.13 |
| 1-Naphthalenethiol                                                 | 20.68 | 20.80 | -0.12 |
| 1-Naphthol                                                         | 18.33 | 18.33 | 0.00  |
| 1-Naphthylamine                                                    | 19.34 | 19.25 | 0.09  |
| 1-Nitrobutane                                                      | 10.41 | 10.46 | -0.05 |
| 1-Nitrohexane                                                      | 14.21 | 14.14 | 0.07  |
| 1-Nitrooctane                                                      | 17.52 | 17.81 | -0.29 |
| 1-Nitropentane                                                     | 12.27 | 12.30 | -0.03 |
| 1-Nitropropane                                                     | 8.59  | 8.63  | -0.04 |
| 1-Nitropropylene                                                   | 8.74  | 8.33  | 0.41  |
| 1-Nonadecene                                                       | 35.62 | 35.60 | 0.02  |
| 1-Nonanol                                                          | 17.96 | 17.93 | 0.03  |
| 1-Nonen-3-ol                                                       | 17.97 | 17.81 | 0.16  |
| 1-Nonen-3-yne                                                      | 16.97 | 16.65 | 0.32  |
| 1-Nonene                                                           | 17.67 | 17.24 | 0.43  |
| 1-Nonyl hydroperoxide                                              | 18.81 | 18.85 | -0.04 |
| 1-Nonyl-3-methylimidazolium<br>bis(trifluoromethanesulfonyl) amide | 38.87 | 38.93 | -0.06 |
| 1-Nonyl-3-methylimidazolium hexafluorophosphate                    | 29.63 | 29.62 | 0.01  |
| 1-Nonylnaphthalene                                                 | 34.17 | 34.22 | -0.05 |
| 1-Nonylphosphine                                                   | 21.30 | 21.33 | -0.03 |
| 1-Nonyne                                                           | 16.33 | 16.56 | -0.23 |
| 1-Octadecene                                                       | 33.75 | 33.76 | -0.01 |
| 1-Octadecylphosphine                                               | 37.88 | 37.84 | 0.04  |
| 1-Octanethiol                                                      | 18.62 | 18.57 | 0.05  |
| 1-Octanol                                                          | 16.13 | 16.09 | 0.04  |
| 1-Octen-3-ol                                                       | 15.93 | 15.97 | -0.04 |
| 1-Octen-3-yne                                                      | 15.13 | 14.81 | 0.32  |
| 1-Octyl hydroperoxide                                              | 17.03 | 17.01 | 0.02  |
| 1-Octyl-3-methylimidazolium<br>bis(trifluoromethanesulfonyl) amide | 37.11 | 37.09 | 0.02  |
| 1-Octyl-3-methylimidazolium chloride                               | 26.88 | 26.86 | 0.02  |
| 1-Octyl-3-methylimidazolium hexafluorophosphate                    | 27.87 | 27.78 | 0.09  |
| 1-Octyl-3-methylimidazolium tetracyanoborate                       | 34.25 | 34.24 | 0.01  |

|                                                                  |       |       |       |
|------------------------------------------------------------------|-------|-------|-------|
| 1-Octyl-3-methylimidazolium tetrafluoroborate                    | 26.26 | 26.30 | -0.04 |
| 1-Octyl-3-methylimidazolium tricyanomethanide                    | 33.33 | 33.26 | 0.07  |
| 1-Octyl-3-methylpyridinium tetrafluoroborate                     | 28.83 | 28.68 | 0.15  |
| 1-Octylnaphthalene                                               | 32.35 | 32.39 | -0.04 |
| 1-Octylphosphine                                                 | 19.45 | 19.49 | -0.04 |
| 1-Octylpyridinium bis(trifluoromethylsulfonyl)amide              | 37.73 | 37.57 | 0.16  |
| 1-Octyne                                                         | 14.69 | 14.72 | -0.03 |
| 1-Pentadecanoic acid                                             | 29.19 | 29.01 | 0.18  |
| 1-Pentadecene                                                    | 28.25 | 28.26 | -0.01 |
| 1-Pentadecyne                                                    | 27.56 | 27.57 | -0.01 |
| 1-Pentanethiol                                                   | 12.98 | 13.07 | -0.09 |
| 1-Pentanol                                                       | 10.63 | 10.58 | 0.05  |
| 1-Penten-3-ol                                                    | 10.38 | 10.46 | -0.08 |
| 1-Penten-3-one                                                   | 9.95  | 10.01 | -0.06 |
| 1-Penten-3-yne                                                   | 9.51  | 9.31  | 0.20  |
| 1-Penten-4-yne                                                   | 8.84  | 9.09  | -0.25 |
| 1-Pentene                                                        | 9.85  | 9.90  | -0.05 |
| 1-Pentyl-3-methylimidazolium acetate                             | 23.39 | 23.21 | 0.18  |
| 1-Pentyl-3-methylimidazolium bis(trifluoromethanesulfonyl) amide | 31.54 | 31.59 | -0.05 |
| 1-Pentyl-3-methylimidazolium hexafluorophosphate                 | 22.24 | 22.27 | -0.03 |
| 1-Pentyl-3-methylimidazolium tetrafluoroborate                   | 20.71 | 20.80 | -0.09 |
| 1-Pentylnaphthalene                                              | 26.80 | 26.88 | -0.08 |
| 1-Pentylphosphine                                                | 14.04 | 13.98 | 0.06  |
| 1-Pentylpyridinium dicyanamide                                   | 25.15 | 25.15 | 0.00  |
| 1-Pentyne                                                        | 9.17  | 9.22  | -0.05 |
| 1-Phenoxy-2-propanol                                             | 17.35 | 17.34 | 0.01  |
| 1-Phenoxy-2-propanone                                            | 16.67 | 16.89 | -0.22 |
| 1-Phenyl-1,2-propanedione                                        | 16.66 | 16.30 | 0.36  |
| 1-Phenyl-1-butanol                                               | 18.40 | 18.49 | -0.09 |
| 1-Phenyl-1-dodecanone                                            | 32.75 | 32.71 | 0.04  |
| 1-Phenyl-1-propanol                                              | 16.47 | 16.65 | -0.18 |
| 1-Phenyl-1-propanone                                             | 16.26 | 16.20 | 0.06  |
| 1-Phenyl-2,3,5-trimethylpyrazolium methylsulfonate               | 27.26 | 27.49 | -0.23 |
| 1-Phenyl-2-butanone                                              | 17.83 | 18.03 | -0.20 |
| 1-Phenyl-2-buten-1-one                                           | 18.35 | 17.95 | 0.40  |
| 1-Phenyl-2-butene                                                | 17.75 | 17.85 | -0.10 |
| 1-Phenyl-2-butyl-3,5-dimethylpyrazolium methylsulfonate          | 32.77 | 32.87 | -0.10 |
| 1-Phenyl-2-heptyl-3,5-dimethylpyrazolium methylsulfonate         | 38.69 | 38.38 | 0.31  |

|                                                                     |       |       |       |
|---------------------------------------------------------------------|-------|-------|-------|
| 1-Phenyl-2-hexyl-3,5-dimethylpyrazolium<br>methanesulfonate         | 36.72 | 36.54 | 0.18  |
| 1-Phenyl-2-methyl-2-propanol                                        | 18.42 | 18.46 | -0.04 |
| 1-Phenyl-2-methylpropanol                                           | 18.32 | 18.47 | -0.15 |
| 1-Phenyl-2-pentanone                                                | 19.67 | 19.87 | -0.20 |
| 1-Phenyl-2-pentyl-3,5-dimethylpyrazolium<br>methanesulfonate        | 34.55 | 34.71 | -0.16 |
| 1-Phenyl-2-propanol                                                 | 16.53 | 16.65 | -0.12 |
| 1-Phenyl-3-butene                                                   | 17.63 | 17.80 | -0.17 |
| 1-Phenyl-3-hexanone                                                 | 21.48 | 21.70 | -0.22 |
| 1-Phenyl-3-pentanone                                                | 19.65 | 19.87 | -0.22 |
| 1-Phenyl-4-hexyl-3-decene                                           | 39.77 | 39.90 | -0.13 |
| 1-Phenyl-4-hexyldecane                                              | 39.89 | 39.93 | -0.04 |
| 1-Phenylallyl alcohol                                               | 16.30 | 16.53 | -0.23 |
| 1-Phenylcyclohexene                                                 | 20.76 | 20.70 | 0.06  |
| 1-Phenyldodecane                                                    | 32.59 | 32.61 | -0.02 |
| 1-Phenylimidazole                                                   | 17.21 | 16.95 | 0.26  |
| 1-Phenylnaphthalene                                                 | 27.48 | 27.44 | 0.04  |
| 1-Phenylpiperazine                                                  | 20.36 | 20.20 | 0.16  |
| 1-Phenylpropargyl alcohol                                           | 15.68 | 15.84 | -0.16 |
| 1-Phenylpyrrolidine                                                 | 19.11 | 18.86 | 0.25  |
| 1-Piperazineethanamine                                              | 15.25 | 15.22 | 0.03  |
| 1-Piperidinamine                                                    | 12.05 | 12.05 | 0.00  |
| 1-Piperidineethanol                                                 | 14.86 | 14.92 | -0.06 |
| 1-Piperidinepropanenitrile                                          | 16.19 | 16.11 | 0.08  |
| 1-Propanesulfonylchloride                                           | 12.03 | 11.84 | 0.19  |
| 1-Propanethiol                                                      | 9.42  | 9.39  | 0.03  |
| 1-Propanol                                                          | 6.98  | 6.91  | 0.07  |
| 1-Propionaphthone                                                   | 23.22 | 23.32 | -0.10 |
| 1-Propoxy-2-propanol                                                | 13.14 | 13.09 | 0.05  |
| 1-Propoxycyclohexene                                                | 17.04 | 17.00 | 0.04  |
| 1-Propyl-3-methylimidazolium acetate                                | 19.57 | 19.53 | 0.04  |
| 1-Propyl-3-methylimidazolium<br>bis(trifluoromethanesulfonyl) amide | 27.94 | 27.91 | 0.03  |
| 1-Propyl-3-methylimidazolium tetrafluoroborate                      | 17.08 | 17.12 | -0.04 |
| 1-Propylamine                                                       | 7.69  | 7.71  | -0.02 |
| 1-Propylcyclopentanol                                               | 15.11 | 15.22 | -0.11 |
| 1-Propylnaphthalene                                                 | 23.09 | 23.21 | -0.12 |
| 1-Propylpyridinium dicyanamide                                      | 21.50 | 21.48 | 0.02  |
| 1-Propylpyridinium tetrafluoroborate                                | 17.58 | 17.60 | -0.02 |
| 1-Propynylbenzene                                                   | 15.88 | 15.50 | 0.38  |
| 1-Propyronitrile-3-butylimidazolium bromide                         | 24.81 | 24.72 | 0.09  |

|                                             |       |       |       |
|---------------------------------------------|-------|-------|-------|
| 1-Propyronitrile-3-hexylimidazolium bromide | 28.44 | 28.39 | 0.05  |
| 1-Propyronitrile-3-octylimidazolium bromide | 31.91 | 32.06 | -0.15 |
| 1-Pyrrolidineethanamine                     | 13.98 | 13.89 | 0.09  |
| 1-Pyrrolidineethanol                        | 13.10 | 13.09 | 0.01  |
| 1-t-Amylnaphthalene                         | 26.91 | 26.87 | 0.04  |
| 1-t-Butyl-4-methoxybenzene                  | 25.81 | 26.02 | -0.21 |
| 1-t-Butylnaphthalene                        | 24.97 | 25.04 | -0.07 |
| 1-Tetradecanethiol                          | 29.49 | 29.58 | -0.09 |
| 1-Tetradecene                               | 26.23 | 26.42 | -0.19 |
| 1-Tetradecylamine                           | 27.94 | 27.90 | 0.04  |
| 1-Tetradecylphosphine                       | 30.47 | 30.50 | -0.03 |
| 1-Tetralone                                 | 17.23 | 17.26 | -0.03 |
| 1-Tridecene                                 | 24.58 | 24.58 | 0.00  |
| 1-Tridecyne                                 | 23.59 | 23.90 | -0.31 |
| 1-Undecanol                                 | 21.66 | 21.60 | 0.06  |
| 1-Undecene                                  | 20.89 | 20.91 | -0.02 |
| 1-Undecyne                                  | 20.20 | 20.23 | -0.03 |
| 1-Vinyl-3-nitrobenzene                      | 17.12 | 16.78 | 0.34  |
| 1-Vinyl-4-fluorobenzene                     | 14.29 | 14.09 | 0.20  |
| 1-Vinylcyclohexene                          | 14.42 | 14.51 | -0.09 |
| 2-((2-Methylphenyl)amino)ethanol            | 18.16 | 18.36 | -0.20 |
| 2-(1,1,2,2-Tetrafluoroethoxy)ethanol        | 9.56  | 9.72  | -0.16 |
| 2-(1-Ethylpropyl)pyridine                   | 18.88 | 18.90 | -0.02 |
| 2-(1-Hydroxybutyl)furan                     | 15.69 | 15.48 | 0.21  |
| 2-(1-Hydroxyethyl)-thiophene                | 14.27 | 14.21 | 0.06  |
| 2-(1-Hydroxyisobutyl)furan                  | 15.31 | 15.47 | -0.16 |
| 2-(1-Iodoethyl)-1,3-dioxolane-4-methanol    | 18.05 | 18.09 | -0.04 |
| 2-(1-Methyl-3-butenyl)-4-cresol             | 22.10 | 22.23 | -0.13 |
| 2-(1-Methylvinyl)aniline                    | 17.79 | 17.61 | 0.18  |
| 2-(1-Vinyloxyethyl)-thiophene               | 17.62 | 17.72 | -0.10 |
| 2-(2-(1-Methylethoxy)ethyl)pyridine         | 19.65 | 19.59 | 0.06  |
| 2-(2-(2-Butoxyethoxy)ethoxy)ethanol         | 21.74 | 21.77 | -0.03 |
| 2-(2-(Diethylamino)ethoxy)ethanol           | 18.16 | 18.27 | -0.11 |
| 2-(2-(Methylthio)ethylthio)ethanol          | 16.74 | 16.78 | -0.04 |
| 2-(2-Butoxyethoxy)ethyl acetate             | 21.07 | 21.24 | -0.17 |
| 2-(2-Chloroethoxy)ethanol                   | 11.31 | 11.32 | -0.01 |
| 2-(2-Hydroxyethyl)-thiophene                | 14.13 | 14.21 | -0.08 |
| 2-(2-Methoxyethoxy)ethanol                  | 11.80 | 11.91 | -0.11 |
| 2-(2-Methoxyethyl)pyridine                  | 16.12 | 15.90 | 0.22  |
| 2-(2-Methylpropoxy)ethanol                  | 13.16 | 13.07 | 0.09  |
| 2-(2-Pyridyl)ethanol                        | 13.97 | 13.97 | 0.00  |
| 2-(2-Pyridyl)ethylamine                     | 14.72 | 14.77 | -0.05 |

|                                       |       |       |       |
|---------------------------------------|-------|-------|-------|
| 2-(2-Vinyloxyethyl)-thiophene         | 17.74 | 17.71 | 0.03  |
| 2-(3-Methyl-6-hydroxyphenyl)-3-hexene | 24.06 | 24.11 | -0.05 |
| 2-(3-Methyl-6-methoxyphenyl)-3-hexene | 26.04 | 25.99 | 0.05  |
| 2-(3-Pentenyl)pyridine                | 18.83 | 18.84 | -0.01 |
| 2-(4-Ethylphenyl)ethanol              | 18.49 | 18.56 | -0.07 |
| 2-(Acetyloxy)-1-phenylethanone        | 18.71 | 18.73 | -0.02 |
| 2-(Allyloxy)ethanol                   | 11.04 | 11.13 | -0.09 |
| 2-(Benzylamino)ethanol                | 17.74 | 17.98 | -0.24 |
| 2-(Benzyloxy)ethanol                  | 17.33 | 17.32 | 0.01  |
| 2-(Bromomethoxy)butane                | 14.05 | 14.23 | -0.18 |
| 2-(Bromomethoxy)heptane               | 19.86 | 19.74 | 0.12  |
| 2-(Bromomethoxy)octane                | 21.85 | 21.58 | 0.27  |
| 2-(Bromomethyl)tetrahydrofuran        | 12.77 | 12.92 | -0.15 |
| 2-(Butylamino)ethanol                 | 13.85 | 13.76 | 0.09  |
| 2-(Chloromethyl)-2-methyloxirane      | 9.93  | 9.89  | 0.04  |
| 2-(Chloromethyl)furan                 | 11.42 | 11.32 | 0.10  |
| 2-(Chloromethylthio)benzothiazole     | 23.66 | 23.70 | -0.04 |
| 2-(Diethoxymethyl)furan               | 18.00 | 18.03 | -0.03 |
| 2-(Diethylamino)ethyl acrylate        | 19.00 | 19.45 | -0.45 |
| 2-(Ethylamino)ethanol                 | 10.27 | 10.08 | 0.19  |
| 2-(Isopropylamino)ethanol             | 12.00 | 11.89 | 0.11  |
| 2-(Methacryloyloxy)ethyl acetoacetate | 20.57 | 20.91 | -0.34 |
| 2-(Methoxymethyl)furan                | 11.91 | 11.91 | 0.00  |
| 2-(Methylthio)aniline                 | 17.54 | 17.24 | 0.30  |
| 2-(Methylthio)ethanol                 | 9.87  | 9.97  | -0.10 |
| 2-(Methylthiomethylthio)ethanol       | 14.83 | 14.86 | -0.03 |
| 2-(Phenoxymethyl)oxirane              | 16.57 | 16.61 | -0.04 |
| 2-(Phenylmethoxy)phenol               | 23.23 | 23.55 | -0.32 |
| 2-(Propylamino)ethanol                | 12.03 | 11.92 | 0.11  |
| 2,2,2-Trifluoroethanol                | 5.20  | 5.19  | 0.01  |
| 2,2,3,3,4,4,4-Heptafluoro-1-butanol   | 9.10  | 9.16  | -0.06 |
| 2,2,3,3,4,4,5,5-Octafluoro-1-pentanol | 10.89 | 10.99 | -0.10 |
| 2,2,3,3,4-Pentamethylpentane          | 18.99 | 19.17 | -0.18 |
| 2,2,3,3-Tetrafluoro-1-propanol        | 6.98  | 7.02  | -0.04 |
| 2,2,3,3-Tetramethylbutane             | 15.31 | 15.52 | -0.21 |
| 2,2,3,3-Tetramethylbutanoic acid      | 16.10 | 16.15 | -0.05 |
| 2,2,3,3-Tetramethylhexane             | 19.08 | 19.19 | -0.11 |
| 2,2,3,3-Tetramethylpentane            | 17.22 | 17.35 | -0.13 |
| 2,2,3,4,4-Pentamethylpentane          | 19.11 | 19.17 | -0.06 |
| 2,2,3,4-Tetramethylhexane             | 19.01 | 19.16 | -0.15 |
| 2,2,3,4-Tetramethylpentane            | 17.22 | 17.33 | -0.11 |
| 2,2,3-Tribromobutane                  | 17.40 | 17.47 | -0.07 |

|                                                 |       |       |       |
|-------------------------------------------------|-------|-------|-------|
| 2,2,3-Trichloro-1,1,1,3,4,4,4-heptafluorobutane | 14.13 | 14.20 | -0.07 |
| 2,2,3-Trichlorobutyraldehyde                    | 14.04 | 14.10 | -0.06 |
| 2,2,3-Trimethylbutanoic acid                    | 14.25 | 14.31 | -0.06 |
| 2,2,3-Trimethylhexane                           | 17.38 | 17.34 | 0.04  |
| 2,2,3-Trimethylpentane                          | 15.43 | 15.51 | -0.08 |
| 2,2,4,4,6,6-Hexamethylcyclotrisilazane          | 25.33 | 25.28 | 0.05  |
| 2,2,4,4-Tetramethylpentane                      | 17.39 | 17.35 | 0.04  |
| 2,2,4,6,6-Pentamethylheptane                    | 22.91 | 22.84 | 0.07  |
| 2,2,4-Trimethyl-1,3-pentanediol                 | 16.68 | 16.63 | 0.05  |
| 2,2,4-Trimethyl-3-pentanol                      | 16.03 | 16.07 | -0.04 |
| 2,2,4-Trimethyl-3-pentanone                     | 15.48 | 15.61 | -0.13 |
| 2,2,4-Trimethylcyclopentanone                   | 14.73 | 14.77 | -0.04 |
| 2,2,4-Trimethylhexane                           | 17.46 | 17.34 | 0.12  |
| 2,2,4-Trimethylpiperidine                       | 16.16 | 15.97 | 0.19  |
| 2,2,5,5-Tetramethylhexane                       | 19.36 | 19.19 | 0.17  |
| 2,2,5,5-Tetramethyltetrahydrofuran              | 15.40 | 15.31 | 0.09  |
| 2,2,5-Trimethylhexane                           | 17.42 | 17.34 | 0.08  |
| 2,2,6,6-Tetramethyl-4-piperidinamine            | 18.97 | 19.13 | -0.16 |
| 2,2,6-Trimethylcyclohexanone                    | 16.42 | 16.60 | -0.18 |
| 2,2,6-Trimethylheptane                          | 19.32 | 19.18 | 0.14  |
| 2,2'-Bioxirane                                  | 8.00  | 7.84  | 0.16  |
| 2,2'-Diaminodiethylamine                        | 12.16 | 12.24 | -0.08 |
| 2,2-Bis(butylthio)-1-propanol                   | 27.97 | 27.97 | 0.00  |
| 2,2-Bis(butylthio)butane                        | 29.17 | 29.25 | -0.08 |
| 2,2-Bis(isobutylthio)-1-propanol                | 28.12 | 27.94 | 0.18  |
| 2,2-Bis(isopropylthio)butane                    | 25.33 | 25.57 | -0.24 |
| 2,2-Bis(isopropylthio)propane                   | 23.70 | 23.73 | -0.03 |
| 2,2-Bis(methylthio)-hexane                      | 22.06 | 21.74 | 0.32  |
| 2,2-Bis(propylthio)-1-propanol                  | 24.45 | 24.30 | 0.15  |
| 2,2-Dichloro-4,4-dimethylhexane                 | 19.27 | 19.34 | -0.07 |
| 2,2-Dichloro-4,4-dimethylpentane                | 17.70 | 17.51 | 0.19  |
| 2,2-Dichloro-7,7-bis(ethoxycarbonyl)heptane     | 29.94 | 29.90 | 0.04  |
| 2,2-Dichlorobutane                              | 11.76 | 12.01 | -0.25 |
| 2,2'-Dichlorodiisopropyl ether                  | 16.26 | 16.34 | -0.08 |
| 2,2-Dichloroethanol                             | 8.93  | 8.91  | 0.02  |
| 2,2-Dichloroethylsulfonyl fluoride              | 11.99 | 12.16 | -0.17 |
| 2,2-Dichlorohexane                              | 15.81 | 15.68 | 0.13  |
| 2,2-Dichloropropane                             | 10.07 | 10.17 | -0.10 |
| 2,2-Diethoxybutane                              | 16.68 | 16.76 | -0.08 |
| 2,2-Diethoxyethanamine                          | 14.35 | 14.50 | -0.15 |
| 2,2-Diethoxyhexane                              | 20.24 | 20.43 | -0.19 |
| 2,2-Diethoxypentane                             | 18.48 | 18.60 | -0.12 |

|                                                        |       |       |       |
|--------------------------------------------------------|-------|-------|-------|
| 2,2-Diethoxypropane                                    | 15.12 | 14.93 | 0.19  |
| 2,2-Diethyl-5-propyltetrahydrofuran                    | 20.87 | 20.84 | 0.03  |
| 2,2-Diethyl-5-propylthiophane                          | 23.21 | 23.47 | -0.26 |
| 2,2-Difluoropropane                                    | 6.26  | 6.50  | -0.24 |
| 2,2-Dimethoxybutane                                    | 12.98 | 13.07 | -0.09 |
| 2,2-Dimethoxyethanamine                                | 10.85 | 10.80 | 0.05  |
| 2,2-Dimethoxy-N-methylethanamine                       | 12.65 | 12.63 | 0.02  |
| 2,2-Dimethoxypropane                                   | 11.24 | 11.23 | 0.01  |
| 2,2-Dimethyl-1-butanol                                 | 12.40 | 12.41 | -0.01 |
| 2,2-Dimethyl-3-ethylpentane                            | 17.02 | 17.34 | -0.32 |
| 2,2-Dimethyl-3-pentanol                                | 14.19 | 14.25 | -0.06 |
| 2,2-Dimethyl-4-(2-butylthioethoxymethyl)-1,3-dioxolane | 26.91 | 27.07 | -0.16 |
| 2,2'-Dimethylbiphenyl                                  | 24.11 | 24.13 | -0.02 |
| 2,2-Dimethylbutanoic acid                              | 12.42 | 12.49 | -0.07 |
| 2,2-Dimethylcyclohexanone                              | 14.66 | 14.78 | -0.12 |
| 2,2-Dimethylheptane                                    | 17.41 | 17.36 | 0.05  |
| 2,2-Dimethylhexane                                     | 15.56 | 15.52 | 0.04  |
| 2,2-Dimethylnonanoic acid                              | 21.61 | 21.66 | -0.05 |
| 2,2-Dimethyloctadecane                                 | 37.61 | 37.55 | 0.06  |
| 2,2-Dimethyloctane                                     | 19.31 | 19.19 | 0.12  |
| 2,2-Dimethyloctanoic acid                              | 19.78 | 19.83 | -0.05 |
| 2,2-Dimethyloxirane                                    | 7.99  | 7.99  | 0.00  |
| 2,2-Dimethylpentane                                    | 13.72 | 13.69 | 0.03  |
| 2,2-Dimethylpentanoic acid                             | 14.27 | 14.32 | -0.05 |
| 2,2-Dimethylpropane                                    | 10.45 | 10.02 | 0.43  |
| 2,2-Dimethylpropylamine                                | 11.29 | 11.38 | -0.09 |
| 2,2-Propanedithiol                                     | 12.68 | 12.53 | 0.15  |
| 2,3,3,4-Tetramethylpentane                             | 17.12 | 17.33 | -0.21 |
| 2,3,3-Trimethyl-1-butene                               | 13.46 | 13.59 | -0.13 |
| 2,3,3-Trimethyl-1-pentene                              | 15.32 | 15.43 | -0.11 |
| 2,3,3-Trimethyl-2-butanol                              | 14.00 | 14.23 | -0.23 |
| 2,3,3-Trimethylhexane                                  | 17.30 | 17.34 | -0.04 |
| 2,3,3-Trimethylpentane                                 | 15.36 | 15.51 | -0.15 |
| 2,3,4,5,6-Pentafluorotoluene                           | 12.20 | 12.22 | -0.02 |
| 2,3,4,5,6-Pentamethylheptane                           | 22.54 | 22.79 | -0.25 |
| 2,3,4,5-Tetramethylhexane                              | 18.95 | 19.14 | -0.19 |
| 2,3,4-Trichloro-1-butene                               | 13.71 | 13.81 | -0.10 |
| 2,3,4-Trimethyl-2-pentene                              | 15.38 | 15.49 | -0.11 |
| 2,3,4-Trimethylhexane                                  | 17.29 | 17.32 | -0.03 |
| 2,3,4-Trimethylhexanoic acid                           | 17.90 | 17.95 | -0.05 |
| 2,3,4-Trimethylpentane                                 | 15.41 | 15.48 | -0.07 |

|                                                |       |       |       |
|------------------------------------------------|-------|-------|-------|
| 2,3,4-Trimethylpentanoic acid                  | 16.07 | 16.12 | -0.05 |
| 2,3,5-Trimethylhexane                          | 17.27 | 17.32 | -0.05 |
| 2,3,6-Collidine                                | 15.46 | 15.46 | 0.00  |
| 2,3-Butandione                                 | 8.34  | 8.40  | -0.06 |
| 2,3-Butanediol dinitrate                       | 14.06 | 14.24 | -0.18 |
| 2,3-Butyleneglycol                             | 9.22  | 9.32  | -0.10 |
| 2,3-Diaminonaphthalene                         | 20.58 | 20.86 | -0.28 |
| 2,3-Dibromo-1-propene                          | 12.25 | 12.24 | 0.01  |
| 2,3-Dibromo-2-methylbutane                     | 16.31 | 16.24 | 0.07  |
| 2,3-Dibromobutane                              | 14.39 | 14.37 | 0.02  |
| 2,3-Dibromoheptane                             | 19.84 | 19.87 | -0.03 |
| 2,3-Dichloro-1,3-butadiene                     | 11.90 | 11.84 | 0.06  |
| 2,3-Dichloro-1-propanol                        | 10.71 | 10.70 | 0.01  |
| 2,3-Dichloro-2-methylbutane                    | 13.91 | 13.86 | 0.05  |
| 2,3-Dichlorobutane                             | 12.03 | 11.96 | 0.07  |
| 2,3-Dichloropentane                            | 13.83 | 13.80 | 0.03  |
| 2,3-Dichloropropanoyl chloride                 | 12.24 | 12.31 | -0.07 |
| 2,3-Dichloropropene                            | 9.95  | 10.08 | -0.13 |
| 2,3-Dichlorotoluene                            | 16.35 | 16.24 | 0.11  |
| 2,3-Dihydro-1,1,3-trimethyl-3-phenyl-1H-indene | 30.63 | 30.54 | 0.09  |
| 2,3-Dihydro-1,4-dioxin                         | 8.25  | 8.29  | -0.04 |
| 2,3-Dihydro-1H-indole                          | 14.96 | 15.11 | -0.15 |
| 2,3-Dihydro-1-methyl-1H-indene                 | 17.16 | 17.13 | 0.03  |
| 2,3-Dihydro-4H-1-benzothiopyran-4-one          | 18.77 | 18.71 | 0.06  |
| 2,3-Dihydrobenzofuran                          | 14.33 | 14.17 | 0.16  |
| 2,3-Dihydrofuran                               | 7.65  | 7.78  | -0.13 |
| 2,3-Dimercapto-1-propanol                      | 13.05 | 12.99 | 0.06  |
| 2,3-Dimethyl-1,3-butadiene                     | 11.87 | 11.67 | 0.20  |
| 2,3-Dimethyl-1-butene                          | 11.88 | 11.75 | 0.13  |
| 2,3-Dimethyl-1-hexene                          | 15.52 | 15.42 | 0.10  |
| 2,3-Dimethyl-1-pentene                         | 13.48 | 13.58 | -0.10 |
| 2,3-Dimethyl-2-butanol                         | 12.38 | 12.38 | 0.00  |
| 2,3-Dimethyl-2-hexene                          | 15.50 | 15.51 | -0.01 |
| 2,3-Dimethyl-2-iodobutane                      | 16.93 | 17.10 | -0.17 |
| 2,3-Dimethyl-2-norbornene                      | 15.51 | 15.61 | -0.10 |
| 2,3-Dimethyl-2-pentene                         | 13.56 | 13.67 | -0.11 |
| 2,3-Dimethyl-3-ethylpentane                    | 17.21 | 17.34 | -0.13 |
| 2,3-Dimethyl-3-pentanol                        | 14.25 | 14.22 | 0.03  |
| 2,3-Dimethylbutane                             | 11.82 | 11.83 | -0.01 |
| 2,3-Dimethylbutanoic acid                      | 12.42 | 12.46 | -0.04 |
| 2,3-Dimethyldecane                             | 22.84 | 22.84 | 0.00  |
| 2,3-Dimethyldodecane                           | 26.52 | 26.51 | 0.01  |



|                                                 |       |       |       |
|-------------------------------------------------|-------|-------|-------|
| 2,3-Dimethylheptadecane                         | 35.70 | 35.69 | 0.01  |
| 2,3-Dimethylheptane                             | 17.31 | 17.33 | -0.02 |
| 2,3-Dimethylheptanoic acid                      | 17.92 | 17.97 | -0.05 |
| 2,3-Dimethylhexadecane                          | 33.88 | 33.85 | 0.03  |
| 2,3-Dimethylhexane                              | 15.92 | 15.50 | 0.42  |
| 2,3-Dimethylnonadecane                          | 39.38 | 39.36 | 0.02  |
| 2,3-Dimethylnonane                              | 21.00 | 21.01 | -0.01 |
| 2,3-Dimethyloctadecane                          | 37.56 | 37.52 | 0.04  |
| 2,3-Dimethyloctane                              | 19.13 | 19.17 | -0.04 |
| 2,3-Dimethylpentadecane                         | 32.03 | 32.02 | 0.01  |
| 2,3-Dimethylpentane                             | 13.61 | 13.66 | -0.05 |
| 2,3-Dimethylpentanoic acid                      | 14.25 | 14.30 | -0.05 |
| 2,3-Dimethyltetradecane                         | 30.21 | 30.18 | 0.03  |
| 2,3-Dimethylthiophene                           | 13.47 | 13.68 | -0.21 |
| 2,3-Dimethyltridecane                           | 28.37 | 28.35 | 0.02  |
| 2,3-Dimethylundecane                            | 24.68 | 24.68 | 0.00  |
| 2,3-Heptanedione                                | 13.85 | 13.91 | -0.06 |
| 2,3-Lutidine                                    | 13.54 | 13.48 | 0.06  |
| 2,3-Pentadiene                                  | 10.01 | 10.05 | -0.04 |
| 2,3-Pentanediol                                 | 11.13 | 11.15 | -0.02 |
| 2,3-Pentanedione                                | 10.09 | 10.24 | -0.15 |
| 2,3-Xylidine                                    | 15.83 | 15.94 | -0.11 |
| 2,4,4-Trimethyl-2-pentanol                      | 16.16 | 16.06 | 0.10  |
| 2,4,4-Trimethyl-2-pentene                       | 15.46 | 15.47 | -0.01 |
| 2,4,4-Trimethylcyclohexanone                    | 16.54 | 16.60 | -0.06 |
| 2,4,4-Trimethylhexane                           | 17.39 | 17.34 | 0.05  |
| 2,4,6,8,10,12-Hexamethylcyclohexasiloxane       | 34.03 | 33.99 | 0.04  |
| 2,4,6,8-Tetramethylcyclotetrasiloxane           | 22.65 | 22.66 | -0.01 |
| 2,4,6-Collidine                                 | 15.31 | 15.46 | -0.15 |
| 2,4,6-Trimethyl-2,4,6-triphenylcyclotrisiloxane | 45.93 | 45.82 | 0.11  |
| 2,4,6-Trimethyl-3-heptene                       | 19.16 | 19.12 | 0.04  |
| 2,4,6-Trimethylaniline                          | 17.71 | 17.85 | -0.14 |
| 2,4,6-Trimethylchroman                          | 21.55 | 21.57 | -0.02 |
| 2,4,6-Trimethyldecane                           | 24.68 | 24.66 | 0.02  |
| 2,4,6-Trimethyldodecane                         | 28.35 | 28.33 | 0.02  |
| 2,4,6-Trimethyleicosane                         | 43.03 | 43.01 | 0.02  |
| 2,4,6-Trimethylheneicosane                      | 44.86 | 44.85 | 0.01  |
| 2,4,6-Trimethylheptadecane                      | 37.54 | 37.51 | 0.03  |
| 2,4,6-Trimethylhexadecane                       | 35.70 | 35.67 | 0.03  |
| 2,4,6-Trimethylnonadecane                       | 41.20 | 41.18 | 0.02  |
| 2,4,6-Trimethylnonane                           | 22.85 | 22.82 | 0.03  |
| 2,4,6-Trimethyloctadecane                       | 39.39 | 39.34 | 0.05  |

|                                 |       |       |       |
|---------------------------------|-------|-------|-------|
| 2,4,6-Trimethyloctane           | 21.00 | 20.99 | 0.01  |
| 2,4,6-Trimethylpentadecane      | 33.86 | 33.84 | 0.02  |
| 2,4,6-Trimethyltetradecane      | 32.03 | 32.00 | 0.03  |
| 2,4,6-Trimethyltridecane        | 30.18 | 30.17 | 0.01  |
| 2,4,6-Trimethylundecane         | 26.51 | 26.50 | 0.01  |
| 2,4-Dibromopentane              | 16.06 | 16.20 | -0.14 |
| 2,4-Dibromotoluene              | 18.56 | 18.44 | 0.12  |
| 2,4-Dichlorotoluene             | 16.33 | 16.24 | 0.09  |
| 2,4-Diethylpyrrole              | 15.73 | 15.76 | -0.03 |
| 2,4-Diethylpyrrolidine          | 15.95 | 15.97 | -0.02 |
| 2,4-Difluoroaniline             | 12.00 | 12.05 | -0.05 |
| 2,4-Dimethyl-1,3-pentadiene     | 13.66 | 13.55 | 0.11  |
| 2,4-Dimethyl-1-pentene          | 13.55 | 13.58 | -0.03 |
| 2,4-Dimethyl-2-pentene          | 13.63 | 13.63 | 0.00  |
| 2,4-Dimethyl-3-ethylpentane     | 17.22 | 17.32 | -0.10 |
| 2,4-Dimethyl-3-isopropylpentane | 19.10 | 19.14 | -0.04 |
| 2,4-Dimethyl-3-pentanol         | 14.21 | 14.23 | -0.02 |
| 2,4-Dimethyl-3-pentanone        | 13.53 | 13.77 | -0.24 |
| 2,4-Dimethylacetophenone        | 18.04 | 18.17 | -0.13 |
| 2,4-Dimethyldecane              | 22.89 | 22.84 | 0.05  |
| 2,4-Dimethyldocosane            | 44.91 | 44.86 | 0.05  |
| 2,4-Dimethyldodecane            | 26.54 | 26.51 | 0.03  |
| 2,4-Dimethyleicosane            | 41.25 | 41.19 | 0.06  |
| 2,4-Dimethylheneicosane         | 43.07 | 43.03 | 0.04  |
| 2,4-Dimethylheptadecane         | 35.72 | 35.69 | 0.03  |
| 2,4-Dimethylheptane             | 17.45 | 17.33 | 0.12  |
| 2,4-Dimethylhexadecane          | 33.88 | 33.85 | 0.03  |
| 2,4-Dimethylhexane              | 15.49 | 15.50 | -0.01 |
| 2,4-Dimethylhexanoic acid       | 16.09 | 16.13 | -0.04 |
| 2,4-Dimethylnitrobenzene        | 16.75 | 16.97 | -0.22 |
| 2,4-Dimethylnonadecane          | 39.43 | 39.36 | 0.07  |
| 2,4-Dimethylnonane              | 21.04 | 21.01 | 0.03  |
| 2,4-Dimethyloctadecane          | 37.57 | 37.52 | 0.05  |
| 2,4-Dimethyloctane              | 19.30 | 19.17 | 0.13  |
| 2,4-Dimethyloxazole             | 10.34 | 10.12 | 0.22  |
| 2,4-Dimethylpentadecane         | 32.05 | 32.02 | 0.03  |
| 2,4-Dimethylpentane             | 13.73 | 13.66 | 0.07  |
| 2,4-Dimethylpentanoic acid      | 14.25 | 14.30 | -0.05 |
| 2,4-Dimethylpyrrole             | 12.11 | 12.09 | 0.02  |
| 2,4-Dimethylpyrrolidine         | 12.55 | 12.30 | 0.25  |
| 2,4-Dimethylquinoline           | 20.30 | 20.45 | -0.15 |
| 2,4-Dimethylsulfolane           | 14.51 | 14.46 | 0.05  |

|                                |       |       |       |
|--------------------------------|-------|-------|-------|
| 2,4-Dimethyltetradecane        | 30.21 | 30.18 | 0.03  |
| 2,4-Dimethylthiazole           | 12.68 | 12.44 | 0.24  |
| 2,4-Dimethylthiophene          | 13.39 | 13.68 | -0.29 |
| 2,4-Dimethyltridecane          | 28.38 | 28.35 | 0.03  |
| 2,4-Dimethylundecane           | 24.71 | 24.68 | 0.03  |
| 2,4-Dinitroanisole             | 18.61 | 18.39 | 0.22  |
| 2,4-Hexanedione                | 12.72 | 12.39 | 0.33  |
| 2,4-Lutidine                   | 13.44 | 13.48 | -0.04 |
| 2,4-Pentanediol                | 11.18 | 11.15 | 0.03  |
| 2,4-Xylenol                    | 14.85 | 15.03 | -0.18 |
| 2,4-Xylidine                   | 15.80 | 15.94 | -0.14 |
| 2,5,5-Trimethylheptane         | 19.18 | 19.18 | 0.00  |
| 2,5,8,11-Tetraoxododecane      | 18.22 | 18.19 | 0.03  |
| 2,5-Aldehydine                 | 15.28 | 15.32 | -0.04 |
| 2,5-Dibromoheptane             | 19.89 | 19.87 | 0.02  |
| 2,5-Dibromooctane              | 21.82 | 21.71 | 0.11  |
| 2,5-Dibromothiophene           | 15.91 | 15.90 | 0.01  |
| 2,5-Dibromotoluene             | 18.65 | 18.44 | 0.21  |
| 2',5'-Dichloroacetophenone     | 18.33 | 18.18 | 0.15  |
| 2,5-Dichlorostyrene            | 18.32 | 17.95 | 0.37  |
| 2,5-Dichlorothiophene          | 13.65 | 13.57 | 0.08  |
| 2,5-Dichlorotoluene            | 16.10 | 16.24 | -0.14 |
| 2,5-Diethylpyrrole             | 15.57 | 15.73 | -0.16 |
| 2,5-Dihydro-1H-pyrrole         | 8.35  | 8.60  | -0.25 |
| 2,5-Dihydro-2,5-dimethoxyfuran | 12.52 | 12.79 | -0.27 |
| 2',5'-Dimethoxyacetophenone    | 19.80 | 19.53 | 0.27  |
| 2,5-Dimethyl-1,5-hexadiene     | 15.50 | 15.34 | 0.16  |
| 2,5-Dimethyl-2,5-hexanediamine | 17.97 | 18.19 | -0.22 |
| 2,5-Dimethyl-2-hexene          | 15.48 | 15.46 | 0.02  |
| 2,5-Dimethyl-4-hendecene       | 24.55 | 24.64 | -0.09 |
| 2,5-Dimethyl-5-undecanol       | 25.16 | 25.23 | -0.07 |
| 2,5-Dimethylacetophenone       | 18.19 | 18.17 | 0.02  |
| 2,5-Dimethylbenzoxazole        | 16.85 | 17.00 | -0.15 |
| 2,5-Dimethylfuran              | 11.22 | 11.29 | -0.07 |
| 2,5-Dimethylheptane            | 17.25 | 17.33 | -0.08 |
| 2,5-Dimethylhexane             | 15.64 | 15.50 | 0.14  |
| 2,5-Dimethyloctane             | 19.29 | 19.17 | 0.12  |
| 2,5-Dimethyloxazole            | 10.16 | 10.17 | -0.01 |
| 2,5-Dimethylpyrazine           | 12.71 | 12.64 | 0.07  |
| 2,5-Dimethylpyrrole            | 11.93 | 12.05 | -0.12 |
| 2,5-Dimethyltetrahydrofuran    | 11.40 | 11.69 | -0.29 |
| 2,5-Dimethylthiophene          | 13.57 | 13.79 | -0.22 |

|                                    |       |       |       |
|------------------------------------|-------|-------|-------|
| 2,5-Dimethylundecane               | 24.61 | 24.68 | -0.07 |
| 2,5-Dioxaheptane                   | 11.42 | 11.35 | 0.07  |
| 2,5-Dipropyl-3-ethylthiophane      | 25.22 | 25.14 | 0.08  |
| 2,5-Dipropyl-3-methylthiophane     | 23.24 | 23.30 | -0.06 |
| 2,5-Dipropylpyrrole                | 19.37 | 19.40 | -0.03 |
| 2,5-Di-t-butylfuran                | 22.42 | 22.29 | 0.13  |
| 2,5-Hexanediol                     | 13.04 | 12.99 | 0.05  |
| 2,5-Lutidine                       | 13.45 | 13.48 | -0.03 |
| 2,5-Xylidine                       | 15.84 | 15.94 | -0.10 |
| 2,6-Dichloroaniline                | 15.98 | 15.95 | 0.03  |
| 2,6-Dichloroanisole                | 17.13 | 16.92 | 0.21  |
| 2,6-Dichlorotoluene                | 16.05 | 16.24 | -0.19 |
| 2,6-Difluoropyridine               | 9.43  | 9.30  | 0.13  |
| 2,6-Diisopropylaniline             | 23.21 | 23.25 | -0.04 |
| 2,6-Diisopropylphenol              | 22.28 | 22.34 | -0.06 |
| 2,6-Dimethyl-2-heptanol            | 17.83 | 17.89 | -0.06 |
| 2,6-Dimethyl-2-heptene             | 17.33 | 17.30 | 0.03  |
| 2,6-Dimethyl-4-ethylpyridine       | 17.24 | 17.29 | -0.05 |
| 2,6-Dimethyl-4-heptanol            | 17.99 | 17.90 | 0.09  |
| 2,6-Dimethylanisole                | 16.66 | 16.91 | -0.25 |
| 2,6-Dimethylchroman                | 19.87 | 19.75 | 0.12  |
| 2,6-Dimethylcyclohexanone          | 14.42 | 14.76 | -0.34 |
| 2,6-Dimethylheptan-4-one           | 17.39 | 17.44 | -0.05 |
| 2,6-Dimethylheptane                | 17.43 | 17.33 | 0.10  |
| 2,6-Dimethylmorpholine             | 13.05 | 12.96 | 0.09  |
| 2,6-Dimethyloctane                 | 19.09 | 19.17 | -0.08 |
| 2,6-Dimethylpentamethylene sulfide | 16.06 | 15.98 | 0.08  |
| 2,6-Dimethylpiperidine             | 14.43 | 14.13 | 0.30  |
| 2,6-Dinitrotoluene                 | 17.51 | 17.71 | -0.20 |
| 2,6-Di-t-butyl-p-cresol            | 28.06 | 27.93 | 0.13  |
| 2,6-Di-t-butylpyridine             | 24.97 | 24.55 | 0.42  |
| 2,6-Lutidine                       | 13.43 | 13.55 | -0.12 |
| 2,6-Nonadien-1-ol                  | 17.69 | 17.77 | -0.08 |
| 2,6-Xylidine                       | 15.80 | 15.94 | -0.14 |
| 2,7-Dimethyloctane                 | 19.34 | 19.17 | 0.17  |
| 2,9-Dimethyl-5,6-diisoamyldecane   | 40.98 | 41.13 | -0.15 |
| 2-Acetoxy-4-oxa-6-oxononane        | 20.60 | 20.68 | -0.08 |
| 2-Acetoxyanisole                   | 17.46 | 17.54 | -0.08 |
| 2-Acetoxyethylphosphine            | 12.77 | 12.84 | -0.07 |
| 2-Acetylfuran                      | 11.73 | 11.36 | 0.37  |
| 2-Acetylthiophene                  | 13.98 | 13.76 | 0.22  |
| 2-Allylphenol                      | 16.38 | 16.67 | -0.29 |

|                                        |       |       |       |
|----------------------------------------|-------|-------|-------|
| 2-Amino-1-butanol                      | 10.34 | 10.08 | 0.26  |
| 2-Aminoisobutanol                      | 10.15 | 10.08 | 0.07  |
| 2-Anisaldehyde                         | 15.41 | 15.21 | 0.20  |
| 2-Benzylpyridine                       | 20.88 | 21.31 | -0.43 |
| 2-Benzyltetrahydropyran                | 21.31 | 21.42 | -0.11 |
| 2-Benzylthiophene                      | 21.23 | 21.55 | -0.32 |
| 2-Bromo-1,1,1-trifluoroethane          | 7.43  | 7.70  | -0.27 |
| 2-Bromo-1,1-diethoxyethane             | 16.01 | 16.20 | -0.19 |
| 2-Bromo-1,1-dimethoxyethane            | 12.47 | 12.51 | -0.04 |
| 2-Bromo-1,3,5-trimethylbenzene         | 19.09 | 19.24 | -0.15 |
| 2-Bromo-1,3-butadiene                  | 11.08 | 10.88 | 0.20  |
| 2-Bromo-1-butene                       | 10.94 | 11.00 | -0.06 |
| 2-Bromo-1-chloro-3,3-dimethylbutane    | 17.27 | 16.84 | 0.43  |
| 2-Bromo-1-chloropropane                | 11.52 | 11.34 | 0.18  |
| 2-Bromo-1-phenyl-1-propanone           | 19.44 | 19.28 | 0.16  |
| 2-Bromo-2-chloro-1,1,1-trifluoroethane | 9.53  | 9.58  | -0.05 |
| 2-Bromo-2-chloro-4,4-dimethylpentane   | 19.02 | 18.85 | 0.17  |
| 2-Bromo-2-chlorobutane                 | 13.32 | 13.35 | -0.03 |
| 2-Bromo-2-chloropropane                | 11.38 | 11.52 | -0.14 |
| 2-Bromo-2-methylbutane                 | 13.24 | 13.16 | 0.08  |
| 2-Bromo-2-methylpropane                | 11.46 | 11.32 | 0.14  |
| 2-Bromo-3,3-difluoro-2-propen-1-ol     | 9.66  | 9.57  | 0.09  |
| 2-Bromo-3-methyl-1-butene              | 12.89 | 12.82 | 0.07  |
| 2-Bromo-4-methylaniline                | 16.71 | 17.04 | -0.33 |
| 2-Bromo-4-methylphenol                 | 15.94 | 16.13 | -0.19 |
| 2-Bromo-4-phenyl-1-butene              | 20.50 | 20.74 | -0.24 |
| 2-Bromo-5-chlorothiophene              | 14.70 | 14.73 | -0.03 |
| 2-Bromoallyl alcohol                   | 9.85  | 9.73  | 0.12  |
| 2-Bromoaniline                         | 15.01 | 15.13 | -0.12 |
| 2-Bromoanisole                         | 16.26 | 16.11 | 0.15  |
| 2-Bromobutane                          | 11.30 | 11.28 | 0.02  |
| 2-Bromobutanoic acid                   | 11.83 | 11.91 | -0.08 |
| 2-Bromodecanoic acid                   | 22.87 | 22.92 | -0.05 |
| 2-Bromododecanoic acid                 | 26.34 | 26.59 | -0.25 |
| 2-Bromoethanesulfonylchloride          | 13.10 | 13.07 | 0.03  |
| 2-Bromoethanol                         | 8.15  | 8.15  | 0.00  |
| 2-Bromohexane                          | 14.81 | 14.95 | -0.14 |
| 2-Bromiodobenzene                      | 18.38 | 18.50 | -0.12 |
| 2-Bromoisobutyronitrile                | 11.14 | 11.24 | -0.10 |
| 2-Bromo-N,N-dimethylaniline            | 18.93 | 19.08 | -0.15 |
| 2-Bromonaphthalene                     | 20.52 | 20.64 | -0.12 |
| 2-Bromooctane                          | 18.70 | 18.62 | 0.08  |

|                                                   |       |       |       |
|---------------------------------------------------|-------|-------|-------|
| 2-Bromopentane                                    | 13.10 | 13.11 | -0.01 |
| 2-Bromopropane                                    | 9.49  | 9.44  | 0.05  |
| 2-Bromopropanoic acid                             | 10.05 | 10.08 | -0.03 |
| 2-Bromopropanoyl chloride                         | 11.33 | 11.61 | -0.28 |
| 2-Bromopropene                                    | 9.17  | 9.17  | 0.00  |
| 2-Bromothiophene                                  | 12.89 | 12.87 | 0.02  |
| 2-Bromotoluene                                    | 15.32 | 15.43 | -0.11 |
| 2-Butanethiol                                     | 11.28 | 11.23 | 0.05  |
| 2-Butanol                                         | 8.79  | 8.75  | 0.04  |
| 2-Butanone                                        | 8.25  | 8.30  | -0.05 |
| 2-Butanone ketazine                               | 17.95 | 17.96 | -0.01 |
| 2-Butanone O-ethyloxime                           | 13.75 | 13.77 | -0.02 |
| 2-Butanone O-propyloxime                          | 15.50 | 15.60 | -0.10 |
| 2-Buten-1-ol                                      | 8.65  | 8.67  | -0.02 |
| 2-Butenoyl chloride                               | 10.41 | 10.27 | 0.14  |
| 2-Butoxy-2-bora-1,3-dioxacyclopentane             | 14.72 | 14.51 | 0.21  |
| 2-Butoxy-4,4-bis(ethylthio)-butane                | 29.86 | 29.80 | 0.06  |
| 2-Butoxy-4-methyl-1,3,2-dioxaphospholane          | 18.02 | 18.09 | -0.07 |
| 2-Butoxyphenol                                    | 19.25 | 19.32 | -0.07 |
| 2-Butoxypyridine                                  | 17.86 | 17.93 | -0.07 |
| 2-Butoxyvinyl bis(diethylamino) phosphorus oxide  | 33.13 | 33.18 | -0.05 |
| 2-Butoxyvinyl bis(dimethylamino) phosphorus oxide | 25.94 | 25.90 | 0.04  |
| 2-Butoxyvinyl diethoxy phosphorus oxide           | 24.47 | 24.61 | -0.14 |
| 2-Butoxyvinyl dimethoxy phosphorus oxide          | 21.24 | 20.91 | 0.33  |
| 2-Butyl-2-ethyl-1,3-propanediol                   | 18.72 | 18.48 | 0.24  |
| 2-Butyl-3-ethyl-5-propylthiophane                 | 26.88 | 26.98 | -0.10 |
| 2-Butylamine                                      | 9.55  | 9.52  | 0.03  |
| 2-Butylbiphenyl                                   | 27.88 | 27.73 | 0.15  |
| 2-Butylnaphthalene                                | 25.12 | 25.04 | 0.08  |
| 2-Butylphenol                                     | 18.51 | 18.63 | -0.12 |
| 2-Butylsilane                                     | 12.30 | 12.32 | -0.02 |
| 2-Butyltetrahydropyran                            | 17.18 | 17.19 | -0.01 |
| 2-Butylthiophene                                  | 17.15 | 17.32 | -0.17 |
| 2-Butylthiovinyl diallyloxy phosphorus oxide      | 30.08 | 30.52 | -0.44 |
| 2-Butylthiovinyl dibutoxy phosphorus oxide        | 34.22 | 34.44 | -0.22 |
| 2-Butylthiovinyl dichloro phosphorus oxide        | 22.93 | 22.81 | 0.12  |
| 2-Butyn-1-al                                      | 7.77  | 7.80  | -0.03 |
| 2-Butyn-1-ol                                      | 8.02  | 8.15  | -0.13 |
| 2-Butyne                                          | 7.39  | 7.60  | -0.21 |
| 2-Butynedinitrile                                 | 7.30  | 7.43  | -0.13 |
| 2-Butyrylthiophene                                | 17.60 | 17.43 | 0.17  |
| 2-Chloro-1,1,1-trifluoroethane                    | 6.50  | 6.53  | -0.03 |

|                                       |       |       |       |
|---------------------------------------|-------|-------|-------|
| 2-Chloro-1,1-diethoxyethane           | 14.94 | 15.04 | -0.10 |
| 2-Chloro-1,1-difluoro-4-iodo-1-butene | 14.82 | 14.96 | -0.14 |
| 2-Chloro-1,1-dimethoxyethane          | 11.58 | 11.34 | 0.24  |
| 2-Chloro-1,3-propanediol              | 9.47  | 9.36  | 0.11  |
| 2-Chloro-1-butanol                    | 10.70 | 10.64 | 0.06  |
| 2-Chloro-1-butene                     | 9.90  | 10.02 | -0.12 |
| 2-Chloro-1-ethylbenzene               | 16.08 | 16.17 | -0.09 |
| 2-Chloro-1-propanol                   | 8.94  | 8.80  | 0.14  |
| 2-Chloro-1-trichloromethoxybenzene    | 20.82 | 20.77 | 0.05  |
| 2-Chloro-1-trifluoromethoxybenzene    | 14.92 | 14.84 | 0.08  |
| 2-Chloro-1-trifluoromethylbenzene     | 14.11 | 14.44 | -0.33 |
| 2-Chloro-2,4,4-trimethylpentane       | 17.44 | 17.47 | -0.03 |
| 2-Chloro-2-methylbutane               | 11.98 | 11.97 | 0.01  |
| 2-Chloro-2-methylpropanal             | 10.06 | 10.34 | -0.28 |
| 2-Chloro-2-methylpropane              | 10.23 | 10.14 | 0.09  |
| 2-Chloro-2-propenenitrile             | 8.16  | 8.10  | 0.06  |
| 2-Chloro-3,3-difluoro-2-propen-1-ol   | 8.71  | 8.58  | 0.13  |
| 2-Chloro-4-methylaniline              | 16.11 | 15.94 | 0.17  |
| 2-Chloro-4-methylpentane              | 13.80 | 13.73 | 0.07  |
| 2-Chloro-5-(trifluoromethyl)aniline   | 15.90 | 16.05 | -0.15 |
| 2-Chloro-6-phenylphenol               | 23.09 | 22.93 | 0.16  |
| 2-Chloroacetophenone                  | 16.01 | 16.27 | -0.26 |
| 2-Chloroacrolein                      | 8.24  | 8.39  | -0.15 |
| 2-Chloroacrylaldehyde                 | 8.24  | 8.34  | -0.10 |
| 2-Chloroallyl alcohol                 | 8.63  | 8.74  | -0.11 |
| 2-Chloroaniline                       | 14.18 | 14.04 | 0.14  |
| 2-Chloroanisole                       | 15.07 | 15.01 | 0.06  |
| 2-Chlorobenzaldehyde                  | 14.56 | 14.54 | 0.02  |
| 2-Chlorobenzyl chloride               | 16.09 | 16.23 | -0.14 |
| 2-Chlorobutane                        | 10.12 | 10.08 | 0.04  |
| 2-Chlorobutanoic acid                 | 10.88 | 10.71 | 0.17  |
| 2-Chlorobutanoic acid methylester     | 12.33 | 12.59 | -0.26 |
| 2-Chlorocrotonaldehyde                | 10.29 | 10.27 | 0.02  |
| 2-Chlorocyclohexanone                 | 12.93 | 13.01 | -0.08 |
| 2-Chlorocyclopentanone                | 11.17 | 11.17 | 0.00  |
| 2-Chloroethanesulfonyl chloride       | 12.05 | 11.91 | 0.14  |
| 2-Chloroethanol                       | 7.02  | 6.98  | 0.04  |
| 2-Chloroethyl acetoacetate            | 14.35 | 14.56 | -0.21 |
| 2-Chloroethyl chloroformate           | 10.96 | 10.94 | 0.02  |
| 2-Chloroethyl crotonate               | 14.42 | 14.38 | 0.04  |
| 2-Chloroethyl ethyl ether             | 10.81 | 10.76 | 0.05  |
| 2-Chloroethyl vinyl ether             | 10.56 | 10.48 | 0.08  |

|                                              |       |       |       |
|----------------------------------------------|-------|-------|-------|
| 2-Chloroethylsulfonyl fluoride               | 10.08 | 10.24 | -0.16 |
| 2-Chloroethylthiobenzene                     | 19.43 | 19.45 | -0.02 |
| 2-Chloroheptane                              | 15.65 | 15.58 | 0.07  |
| 2-Chlorohexane                               | 13.75 | 13.75 | 0.00  |
| 2-Chloriodobenzene                           | 17.30 | 17.41 | -0.11 |
| 2-Chloroisopropylacetate                     | 12.76 | 12.79 | -0.03 |
| 2-Chloro-N-(2-chloroethyl)-N-ethylethanamine | 17.17 | 17.18 | -0.01 |
| 2-Chloro-N,N-diallylacetamide                | 18.39 | 18.68 | -0.29 |
| 2-Chloro-N,N-dimethylaniline                 | 17.96 | 17.98 | -0.02 |
| 2-Chloronaphthalene                          | 19.59 | 19.54 | 0.05  |
| 2-Chlorooctane                               | 17.49 | 17.42 | 0.07  |
| 2-Chloro-p-cresol                            | 14.58 | 15.03 | -0.45 |
| 2-Chloropentane                              | 11.96 | 11.91 | 0.05  |
| 2-Chloropentanoic acid                       | 12.69 | 12.55 | 0.14  |
| 2-Chlorophenol                               | 12.89 | 13.12 | -0.23 |
| 2-Chloropropanal                             | 8.03  | 8.45  | -0.42 |
| 2-Chloropropane                              | 8.32  | 8.24  | 0.08  |
| 2-Chloropropanoic acid                       | 8.97  | 8.88  | 0.09  |
| 2-Chloropropene                              | 8.11  | 8.18  | -0.07 |
| 2-Chloropyridine                             | 11.57 | 11.60 | -0.03 |
| 2-Chloroquinoline                            | 18.61 | 18.57 | 0.04  |
| 2-Chlorostyrene                              | 16.26 | 16.04 | 0.22  |
| 2-Chlorothiophene                            | 11.62 | 11.70 | -0.08 |
| 2-Chlorotoluene                              | 14.25 | 14.33 | -0.08 |
| 2-Cyanobutane                                | 9.95  | 9.93  | 0.02  |
| 2-Cyanoethanol                               | 6.92  | 6.83  | 0.09  |
| 2-Cyanopropan-2-ol                           | 8.59  | 8.65  | -0.06 |
| 2-Cyclohexen-1-ol                            | 11.12 | 11.50 | -0.38 |
| 2-Cyclohexene-1-one                          | 11.42 | 11.04 | 0.38  |
| 2-Cyclohexyl-2-methylpentadecane             | 40.32 | 40.35 | -0.03 |
| 2-Cyclohexylcyclohexanone                    | 21.22 | 21.25 | -0.03 |
| 2-Cyclohexyltetradecane                      | 36.80 | 36.67 | 0.13  |
| 2-Cyclohexyltetrahydropyran                  | 20.07 | 20.00 | 0.07  |
| 2-Cyclohexylthiacyclohexane                  | 22.38 | 22.46 | -0.08 |
| 2-Cyclopenten-1-one                          | 9.06  | 9.20  | -0.14 |
| 2-Cyclopentylidenecyclopentanone             | 17.83 | 17.59 | 0.24  |
| 2-Cyclopentylthiacyclohexane                 | 20.70 | 20.62 | 0.08  |
| 2-Decanol                                    | 19.75 | 19.76 | -0.01 |
| 2-Decanone                                   | 19.23 | 19.31 | -0.08 |
| 2-Decyn-1-ol                                 | 18.99 | 19.17 | -0.18 |
| 2-Diethylaminoethanol                        | 13.76 | 13.93 | -0.17 |
| 2-Diethylaminoethylamine                     | 14.49 | 14.73 | -0.24 |



|                                                   |       |       |       |
|---------------------------------------------------|-------|-------|-------|
| 2-Dodecanol                                       | 23.49 | 23.44 | 0.05  |
| 2-Dodecanone                                      | 23.17 | 22.98 | 0.19  |
| 2-Ethoxy-1,2-diphenylethanone                     | 28.48 | 28.44 | 0.04  |
| 2-Ethoxy-3,4-dihydro-2H-pyran                     | 13.85 | 13.89 | -0.04 |
| 2-Ethoxy-4-methyl-1,3,2-dioxaphospholane          | 14.36 | 14.42 | -0.06 |
| 2-Ethoxyethanamine                                | 10.29 | 10.22 | 0.07  |
| 2-Ethoxyethanol                                   | 9.53  | 9.42  | 0.11  |
| 2-Ethoxyethyl acrylate                            | 14.94 | 14.94 | 0.00  |
| 2-Ethoxyethylacetate                              | 13.20 | 13.22 | -0.02 |
| 2-Ethoxymethylthiophene                           | 15.93 | 16.15 | -0.22 |
| 2-Ethoxynaphthalene                               | 21.88 | 22.06 | -0.18 |
| 2-Ethoxythiophene                                 | 14.16 | 14.10 | 0.06  |
| 2-Ethoxyvinyl bis(dibutylamino) phosphorus oxide  | 43.75 | 44.19 | -0.44 |
| 2-Ethoxyvinyl bis(dimethylamino) phosphorus oxide | 22.25 | 22.23 | 0.02  |
| 2-Ethyl-1,3,5-trimethylbenzene                    | 19.82 | 19.97 | -0.15 |
| 2-Ethyl-1,3-butadiene                             | 11.80 | 11.64 | 0.16  |
| 2-Ethyl-1-butanol                                 | 12.36 | 12.40 | -0.04 |
| 2-Ethyl-1-butene                                  | 11.65 | 11.77 | -0.12 |
| 2-Ethyl-1-hexanol                                 | 16.03 | 16.07 | -0.04 |
| 2-Ethyl-1-pentene                                 | 13.48 | 13.60 | -0.12 |
| 2-Ethyl-2 methyl-5-propylthiophane                | 21.62 | 21.64 | -0.02 |
| 2-Ethyl-2-methyl-5-propyltetrahydrofuran          | 19.06 | 19.01 | 0.05  |
| 2-Ethyl-3-methyl-1-butene                         | 13.49 | 13.58 | -0.09 |
| 2-Ethyl-3-methyl-1-pentene                        | 15.34 | 15.42 | -0.08 |
| 2-Ethyl-3-methyl-5-propylthiophane                | 21.62 | 21.47 | 0.15  |
| 2-Ethyl-3-propyl-1,4-dioxane                      | 17.76 | 17.87 | -0.11 |
| 2-Ethyl-4-isopropylpyrrolidine                    | 17.77 | 17.79 | -0.02 |
| 2-Ethyl-4-methylpyrrole                           | 13.85 | 13.93 | -0.08 |
| 2-Ethyl-4-methylpyrrolidine                       | 14.33 | 14.14 | 0.19  |
| 2-Ethyl-4-oxo-1-heptanol                          | 17.88 | 18.02 | -0.14 |
| 2-Ethyl-5-methylthiophane                         | 16.01 | 15.98 | 0.03  |
| 2-Ethyl-5-methylthiophane sulfone                 | 16.18 | 16.31 | -0.13 |
| 2-Ethyl-5-propylpyrrole                           | 17.53 | 17.56 | -0.03 |
| 2-Ethyl-5-propylthiophane                         | 19.61 | 19.65 | -0.04 |
| 2-Ethyl-5-propylthiophane sulfone                 | 19.70 | 19.98 | -0.28 |
| 2-Ethyl-6-methylaniline                           | 17.71 | 17.77 | -0.06 |
| 2-Ethylaniline                                    | 15.76 | 15.87 | -0.11 |
| 2-Ethylbutanoic acid                              | 12.43 | 12.48 | -0.05 |
| 2-Ethylbutyl acetate                              | 16.15 | 16.21 | -0.06 |
| 2-Ethylbutyryl chloride                           | 13.84 | 14.01 | -0.17 |
| 2-Ethylfuran                                      | 11.14 | 11.25 | -0.11 |
| 2-Ethylheptanoic acid                             | 17.94 | 17.98 | -0.04 |

|                                                      |       |       |       |
|------------------------------------------------------|-------|-------|-------|
| 2-Ethylhexanal                                       | 15.72 | 15.72 | 0.00  |
| 2-Ethylhexanoic acid                                 | 16.16 | 16.15 | 0.01  |
| 2-Ethylhexanoyl chloride                             | 17.87 | 17.68 | 0.19  |
| 2-Ethylhexyl acetate                                 | 19.84 | 19.88 | -0.04 |
| 2-Ethylhexyl acrylate                                | 21.58 | 21.59 | -0.01 |
| 2-Ethylhexyl methacrylate                            | 23.36 | 23.45 | -0.09 |
| 2-Ethyl-m-xylene                                     | 17.97 | 18.07 | -0.10 |
| 2-Ethyl-naphthalene                                  | 21.36 | 21.37 | -0.01 |
| 2-Ethyl-nitrobenzene                                 | 16.66 | 16.90 | -0.24 |
| 2-Ethyl-nonanoic acid                                | 21.61 | 21.66 | -0.05 |
| 2-Ethyl-octanoic acid                                | 19.77 | 19.82 | -0.05 |
| 2-Ethyl-pentamethylene sulfide                       | 15.99 | 15.98 | 0.01  |
| 2-Ethyl-pentanoic acid                               | 14.25 | 14.31 | -0.06 |
| 2-Ethyl-p-xylene                                     | 18.05 | 18.07 | -0.02 |
| 2-Ethyl-pyridine                                     | 13.07 | 13.41 | -0.34 |
| 2-Ethylstyrene                                       | 18.18 | 17.87 | 0.31  |
| 2-Ethyl-tetrahydrofuran                              | 11.59 | 11.69 | -0.10 |
| 2-Ethyl-tetrahydropyran                              | 13.51 | 13.52 | -0.01 |
| 2-Ethylthioethanol                                   | 11.90 | 11.89 | 0.01  |
| 2-Ethylthiophene                                     | 13.45 | 13.65 | -0.20 |
| 2-Ethylthiovinyl bis(ethoxyethoxy) phosphorus oxide  | 32.18 | 32.10 | 0.08  |
| 2-Ethylthiovinyl bis(methoxyethoxy) phosphorus oxide | 28.43 | 28.41 | 0.02  |
| 2-Ethylthiovinyl diallyloxy phosphorus oxide         | 26.56 | 26.85 | -0.29 |
| 2-Ethylthiovinyl dibutoxy phosphorus oxide           | 31.09 | 30.76 | 0.33  |
| 2-Ethylthiovinyl dichloro phosphorus oxide           | 19.19 | 19.14 | 0.05  |
| 2-Ethylthiovinyl dihexoxy phosphorus oxide           | 37.72 | 38.11 | -0.39 |
| 2-Ethylthiovinyl dipropoxy phosphorus oxide          | 26.90 | 27.09 | -0.19 |
| 2-Ethyltoluene                                       | 16.03 | 16.16 | -0.13 |
| 2-Fluoro-1,1,2-trichloroethane                       | 10.25 | 10.29 | -0.04 |
| 2-Fluoro-1,3-butadiene                               | 8.23  | 7.90  | 0.33  |
| 2-Fluoro-1-phenylethanone                            | 14.45 | 14.33 | 0.12  |
| 2-Fluoro-2-methylbutane                              | 9.88  | 9.97  | -0.09 |
| 2-Fluoro-4-methylpyridine                            | 11.35 | 11.36 | -0.01 |
| 2-Fluoro-6-methylpyridine                            | 11.36 | 11.42 | -0.06 |
| 2-Fluoroaniline                                      | 12.04 | 12.09 | -0.05 |
| 2-Fluoroanisole                                      | 12.73 | 13.06 | -0.33 |
| 2-Fluorobenzaldehyde                                 | 12.77 | 12.59 | 0.18  |
| 2-Fluorobenzotrifluoride                             | 12.30 | 12.49 | -0.19 |
| 2-Fluorobenzoyl chloride                             | 14.77 | 14.54 | 0.23  |
| 2-Fluoroethanol                                      | 5.14  | 5.05  | 0.09  |
| 2-Fluoronitrobenzene                                 | 13.39 | 13.12 | 0.27  |

|                                            |       |       |       |
|--------------------------------------------|-------|-------|-------|
| 2-Fluorophenylethylether                   | 14.85 | 14.90 | -0.05 |
| 2-Fluoropyridine                           | 9.30  | 9.45  | -0.15 |
| 2-Fluorotoluene                            | 12.14 | 12.38 | -0.24 |
| 2-Formylnaphthalene                        | 20.21 | 19.74 | 0.47  |
| 2-Furancarbonitrile                        | 9.68  | 9.33  | 0.35  |
| 2-Furanmethanethiol                        | 12.41 | 12.45 | -0.04 |
| 2-Furfurylamine                            | 10.56 | 10.77 | -0.21 |
| 2-Heptanamine                              | 15.08 | 15.03 | 0.05  |
| 2-Heptanol                                 | 14.30 | 14.26 | 0.04  |
| 2-Heptanone                                | 13.79 | 13.80 | -0.01 |
| 2-Heptanoylthiophene                       | 23.17 | 22.93 | 0.24  |
| 2-Heptenal                                 | 13.75 | 13.82 | -0.07 |
| 2-Heptyl bromide                           | 16.93 | 16.78 | 0.15  |
| 2-Heptylnaphthalene                        | 30.69 | 30.55 | 0.14  |
| 2-Heptylthiophene                          | 22.69 | 22.82 | -0.13 |
| 2-Heptyne                                  | 13.05 | 13.10 | -0.05 |
| 2-Hexanethiol                              | 14.95 | 14.90 | 0.05  |
| 2-Hexanol                                  | 12.42 | 12.42 | 0.00  |
| 2-Hexanoylthiophene                        | 21.33 | 21.10 | 0.23  |
| 2-Hexenoic acid                            | 12.50 | 12.42 | 0.08  |
| 2-Hexoxy-4-methyl-1,3,2-dioxaphospholane   | 21.69 | 21.76 | -0.07 |
| 2-Hexylnaphthalene                         | 28.84 | 28.72 | 0.12  |
| 2-Hexylthiacyclohexane                     | 23.39 | 23.32 | 0.07  |
| 2-Hexylthiophene                           | 20.86 | 20.99 | -0.13 |
| 2-Hexyne                                   | 11.12 | 11.27 | -0.15 |
| 2-Hydroxy-1-phenyl-1-propanone             | 16.74 | 16.76 | -0.02 |
| 2-Hydroxy-2-dibutylphosphonato-3-butanone  | 27.95 | 28.01 | -0.06 |
| 2-Hydroxy-2-diethylphosphonato-3-butanone  | 20.73 | 20.67 | 0.06  |
| 2-Hydroxy-2-dimethylphosphonato-3-butanone | 16.96 | 16.97 | -0.01 |
| 2-Hydroxy-5-methylbenzaldehyde             | 15.69 | 15.23 | 0.46  |
| 2-Hydroxyacetophenone                      | 15.40 | 15.06 | 0.34  |
| 2-Hydroxybenzaldehyde                      | 13.68 | 13.33 | 0.35  |
| 2-Hydroxybenzonitrile                      | 13.35 | 13.04 | 0.31  |
| 2-Hydroxybicyclopentyl                     | 18.02 | 18.04 | -0.02 |
| 2-Hydroxyethylammonium acetate             | 11.62 | 11.49 | 0.13  |
| 2-hydroxyethylammonium butanoate           | 15.27 | 15.16 | 0.11  |
| 2-Hydroxyethylammonium formate             | 9.85  | 9.79  | 0.06  |
| 2-Hydroxyethylammonium hexanoate           | 18.95 | 18.83 | 0.12  |
| 2-Hydroxyethylammonium lactate             | 13.75 | 13.89 | -0.14 |
| 2-Hydroxyethylammonium pentanoate          | 17.09 | 17.00 | 0.09  |
| 2-Hydroxyethylammonium propionate          | 13.20 | 13.33 | -0.13 |
| 2-Hydroxyethylmethacrylate                 | 12.89 | 13.02 | -0.13 |

|                                                       |       |       |       |
|-------------------------------------------------------|-------|-------|-------|
| 2-Hydroxyethylphosphine                               | 8.99  | 9.04  | -0.05 |
| 2-Hydroxythiophene                                    | 10.29 | 10.37 | -0.08 |
| 2-Indanone                                            | 15.30 | 15.42 | -0.12 |
| 2-Iodo-2-methylbutane                                 | 15.41 | 15.28 | 0.13  |
| 2-Iodo-2-methylpropane                                | 13.47 | 13.45 | 0.02  |
| 2-Iodoacetophenone                                    | 19.57 | 19.34 | 0.23  |
| 2-Iodobutane                                          | 13.45 | 13.43 | 0.02  |
| 2-Iodoethanol                                         | 10.20 | 10.18 | 0.02  |
| 2-Iodonaphthalene                                     | 22.95 | 22.61 | 0.34  |
| 2-Iodooctane                                          | 20.75 | 20.77 | -0.02 |
| 2-Iodopropane                                         | 11.69 | 11.59 | 0.10  |
| 2-Iodotoluene                                         | 17.45 | 17.40 | 0.05  |
| 2-Isoamyoxyvinyl bis(dibutylamino) phosphorus oxide   | 49.50 | 49.68 | -0.18 |
| 2-Isobutylfuran                                       | 14.81 | 14.90 | -0.09 |
| 2-Isobutyltetrahydrofuran                             | 15.36 | 15.34 | 0.02  |
| 2-Isobutyrylthiophene                                 | 17.67 | 17.41 | 0.26  |
| 2-Isopropoxyethanol                                   | 11.32 | 11.26 | 0.06  |
| 2-Isopropoxyvinyl bis(dimethylamino) phosphorus oxide | 24.11 | 24.07 | 0.04  |
| 2-Isopropyl-5-methylphenol                            | 18.75 | 18.68 | 0.07  |
| 2-Isopropylnaphthalene                                | 23.19 | 23.19 | 0.00  |
| 2-Isopropyl-p-cresol                                  | 18.49 | 18.68 | -0.19 |
| 2-Isopropyltetrahydropyran                            | 15.31 | 15.34 | -0.03 |
| 2-Isopropyltoluene                                    | 17.87 | 17.98 | -0.11 |
| 2-Mercaptoethanol                                     | 8.17  | 8.12  | 0.05  |
| 2-Methoxy-1,1'-biphenyl                               | 23.22 | 22.90 | 0.32  |
| 2-Methoxy-1,3-butadiene                               | 10.71 | 10.33 | 0.38  |
| 2-Methoxy-1-phenylethanone                            | 17.12 | 16.85 | 0.27  |
| 2-Methoxy-1-propanol                                  | 9.37  | 9.41  | -0.04 |
| 2-Methoxy-4-methyl-1,3,2-dioxaphospholane             | 12.49 | 12.57 | -0.08 |
| 2-Methoxyaniline                                      | 14.68 | 14.71 | -0.03 |
| 2-Methoxybenzenemethanamine                           | 16.42 | 16.36 | 0.06  |
| 2-Methoxyethyl acetate                                | 11.27 | 11.38 | -0.11 |
| 2-Methoxymethylthiophene                              | 14.04 | 14.31 | -0.27 |
| 2-Methoxynitrobenzene                                 | 15.68 | 15.74 | -0.06 |
| 2-Methoxy-p-cresol                                    | 15.53 | 15.71 | -0.18 |
| 2-Methoxyphenol                                       | 13.74 | 13.80 | -0.06 |
| 2-Methoxypyridine                                     | 12.25 | 12.41 | -0.16 |
| 2-Methoxystyrene                                      | 16.58 | 16.72 | -0.14 |
| 2-Methoxythiophene                                    | 12.28 | 12.26 | 0.02  |
| 2-Methyl-1,2-propanediamine                           | 10.97 | 10.88 | 0.09  |

|                               |       |       |       |
|-------------------------------|-------|-------|-------|
| 2-Methyl-1,2-propanediol      | 9.30  | 9.29  | 0.01  |
| 2-Methyl-1,3-cyclohexadiene   | 12.52 | 12.72 | -0.20 |
| 2-Methyl-1,3-dioxolane        | 8.70  | 8.62  | 0.08  |
| 2-Methyl-1,3-propanediol      | 9.37  | 9.29  | 0.08  |
| 2-Methyl-1,4-dibromobutane    | 16.00 | 16.15 | -0.15 |
| 2-Methyl-1,5-dibromopentane   | 17.89 | 17.98 | -0.09 |
| 2-Methyl-1,5-hexadiene        | 13.44 | 13.48 | -0.04 |
| 2-Methyl-1,5-pentanediol      | 13.02 | 12.96 | 0.06  |
| 2-Methyl-1-butanethiol        | 13.03 | 13.05 | -0.02 |
| 2-Methyl-1-butanol            | 10.60 | 10.57 | 0.03  |
| 2-Methyl-1-butyl acetate      | 14.44 | 14.37 | 0.07  |
| 2-Methyl-1-heptanol           | 16.42 | 16.07 | 0.35  |
| 2-Methyl-1-heptene            | 15.59 | 15.44 | 0.15  |
| 2-Methyl-1-hexanol            | 14.19 | 14.24 | -0.05 |
| 2-Methyl-1-hexene             | 13.58 | 13.60 | -0.02 |
| 2-Methyl-1H-indene            | 17.26 | 17.10 | 0.16  |
| 2-Methyl-1-nonene             | 19.15 | 19.11 | 0.04  |
| 2-Methyl-1-octene             | 17.19 | 17.27 | -0.08 |
| 2-Methyl-1-pentanol           | 12.36 | 12.40 | -0.04 |
| 2-Methyl-1-pentene            | 11.69 | 11.77 | -0.08 |
| 2-Methyl-1-phenyl-1-propanone | 18.03 | 18.02 | 0.01  |
| 2-Methyl-1-propanethiol       | 11.25 | 11.21 | 0.04  |
| 2-Methyl-1-propanol           | 8.80  | 8.73  | 0.07  |
| 2-Methyl-1-undecanol          | 23.37 | 23.42 | -0.05 |
| 2-Methyl-2-butanamine         | 11.34 | 11.36 | -0.02 |
| 2-Methyl-2-butanol            | 10.58 | 10.56 | 0.02  |
| 2-Methyl-2-chloropentadecane  | 32.24 | 32.16 | 0.08  |
| 2-Methyl-2-cyclohexen-1-one   | 12.91 | 12.90 | 0.01  |
| 2-Methyl-2-cyclopenten-1-one  | 10.96 | 11.07 | -0.11 |
| 2-Methyl-2-heptanol           | 16.21 | 16.07 | 0.14  |
| 2-Methyl-2-heptene            | 15.53 | 15.48 | 0.05  |
| 2-Methyl-2-hexanol            | 14.28 | 14.23 | 0.05  |
| 2-Methyl-2-hexene             | 13.72 | 13.64 | 0.08  |
| 2-Methyl-2-octanol            | 17.92 | 17.91 | 0.01  |
| 2-Methyl-2-pentadecanol       | 30.84 | 30.75 | 0.09  |
| 2-Methyl-2-pentanol           | 12.02 | 12.40 | -0.38 |
| 2-Methyl-2-pentenal           | 12.16 | 12.01 | 0.15  |
| 2-Methyl-2-pentene            | 11.80 | 11.81 | -0.01 |
| 2-Methyl-2-phenyloxirane      | 15.89 | 15.89 | 0.00  |
| 2-Methyl-2-phenylpentadecane  | 39.74 | 39.94 | -0.20 |
| 2-Methyl-2-propanol           | 8.79  | 8.73  | 0.06  |
| 2-Methyl-2-propenol           | 8.59  | 8.65  | -0.06 |

|                                                        |       |       |       |
|--------------------------------------------------------|-------|-------|-------|
| 2-Methyl-3-amino-4-methoxymethyl-5-aminomethylpyridine | 21.09 | 20.85 | 0.24  |
| 2-Methyl-3-butyn-2-ol                                  | 9.81  | 9.76  | 0.05  |
| 2-Methyl-3-heptanol                                    | 16.08 | 16.08 | 0.00  |
| 2-Methyl-3-hexanone                                    | 13.69 | 13.79 | -0.10 |
| 2-Methyl-3-hexyne                                      | 13.06 | 13.09 | -0.03 |
| 2-Methyl-3-pentanol                                    | 12.37 | 12.41 | -0.04 |
| 2-Methyl-3-pentenoic acid                              | 12.35 | 12.40 | -0.05 |
| 2-Methyl-4,6-dicrotylphenol                            | 27.43 | 27.79 | -0.36 |
| 2-Methyl-4-crotylphenol                                | 20.32 | 20.45 | -0.13 |
| 2-Methyl-4-ethylpyrrolidine                            | 14.33 | 14.14 | 0.19  |
| 2-Methyl-4-heptanol                                    | 16.07 | 16.08 | -0.01 |
| 2-Methyl-4-heptanone                                   | 15.50 | 15.62 | -0.12 |
| 2-Methyl-4-hexanone                                    | 13.72 | 13.79 | -0.07 |
| 2-Methyl-4-isopropylpyrrolidine                        | 15.95 | 15.96 | -0.01 |
| 2-Methyl-4-oxo-1-heptanol                              | 16.02 | 16.18 | -0.16 |
| 2-Methyl-5-ethylpyrrole                                | 13.83 | 13.89 | -0.06 |
| 2-Methyl-5-phenylpyridine                              | 21.83 | 21.38 | 0.45  |
| 2-Methyl-5-propylpyrrole                               | 15.61 | 15.73 | -0.12 |
| 2-Methyl-5-propylthiophane                             | 17.86 | 17.81 | 0.05  |
| 2-Methyl-5-propylthiophane sulfone                     | 18.03 | 18.15 | -0.12 |
| 2-Methyl-5-undecanol                                   | 23.41 | 23.42 | -0.01 |
| 2-Methyl-6-propyldioxane                               | 16.01 | 16.03 | -0.02 |
| 2-Methylacrylonitrile                                  | 8.06  | 8.01  | 0.05  |
| 2-Methylaminoethanol                                   | 8.35  | 8.26  | 0.09  |
| 2-Methylanisole                                        | 14.85 | 15.00 | -0.15 |
| 2-Methylbenzaldehyde                                   | 14.61 | 14.53 | 0.08  |
| 2-Methylbenzeneethanol                                 | 16.56 | 16.72 | -0.16 |
| 2-Methylbenzenemethanamine                             | 15.52 | 15.69 | -0.17 |
| 2-Methylbenzimidazole                                  | 16.42 | 16.41 | 0.01  |
| 2-Methylbenzo[b]furane                                 | 15.82 | 15.80 | 0.02  |
| 2-Methylbenzoic acid                                   | 15.25 | 14.96 | 0.29  |
| 2-Methylbenzothiazole                                  | 17.41 | 17.53 | -0.12 |
| 2-Methylbenzoxazole                                    | 14.99 | 15.09 | -0.10 |
| 2-Methylbutanoyl chloride                              | 12.12 | 12.17 | -0.05 |
| 2-Methylbutyl acrylate                                 | 16.10 | 16.09 | 0.01  |
| 2-Methylbutyric acid                                   | 10.63 | 10.64 | -0.01 |
| 2-Methylcyclohexanone                                  | 12.88 | 12.94 | -0.06 |
| 2-Methylcyclohexyl acrylate                            | 18.99 | 18.91 | 0.08  |
| 2-Methylcyclopentanone                                 | 11.14 | 11.10 | 0.04  |
| 2-Methyldecane                                         | 21.08 | 21.02 | 0.06  |
| 2-Methyldecanoic acid                                  | 21.61 | 21.66 | -0.05 |

|                          |       |       |       |
|--------------------------|-------|-------|-------|
| 2-Methyldiphenylmethane  | 23.87 | 24.06 | -0.19 |
| 2-Methyldodecane         | 24.70 | 24.69 | 0.01  |
| 2-Methylenecyclohexanol  | 13.33 | 13.32 | 0.01  |
| 2-Methylfuran            | 9.28  | 9.41  | -0.13 |
| 2-Methylheptadecane      | 33.91 | 33.87 | 0.04  |
| 2-Methylheptane          | 15.55 | 15.52 | 0.03  |
| 2-Methylheptanoic acid   | 16.10 | 16.15 | -0.05 |
| 2-Methylheptyl acetate   | 19.81 | 19.88 | -0.07 |
| 2-Methylhexadecane       | 32.11 | 32.03 | 0.08  |
| 2-Methylhexane           | 13.71 | 13.68 | 0.03  |
| 2-Methylhexanoic acid    | 14.21 | 14.31 | -0.10 |
| 2-Methylindole           | 17.35 | 16.85 | 0.50  |
| 2-Methylnaphthalene      | 19.21 | 19.54 | -0.33 |
| 2-Methylnonadecane       | 37.58 | 37.54 | 0.04  |
| 2-Methylnonane           | 19.19 | 19.19 | 0.00  |
| 2-Methylnonanoic acid    | 19.77 | 19.82 | -0.05 |
| 2-Methyloctadecane       | 35.77 | 35.70 | 0.07  |
| 2-Methyloctane           | 17.49 | 17.35 | 0.14  |
| 2-Methyloctanoic acid    | 17.94 | 17.98 | -0.04 |
| 2-Methyloxazoline        | 8.74  | 9.04  | -0.30 |
| 2-Methyloxetane          | 8.03  | 8.02  | 0.01  |
| 2-Methylpentadecane      | 30.25 | 30.20 | 0.05  |
| 2-Methylpentane          | 12.26 | 11.84 | 0.42  |
| 2-Methylpentanedinitrile | 11.75 | 11.68 | 0.07  |
| 2-Methylpentanoic acid   | 12.44 | 12.48 | -0.04 |
| 2-Methylpiperidine       | 12.42 | 12.32 | 0.10  |
| 2-Methylpropanal         | 8.25  | 8.38  | -0.13 |
| 2-Methylpropanoic acid   | 8.94  | 8.81  | 0.13  |
| 2-Methylpropenoic acid   | 8.71  | 8.73  | -0.02 |
| 2-Methylpropylamine      | 9.68  | 9.53  | 0.15  |
| 2-Methylpyrazine         | 10.73 | 10.66 | 0.07  |
| 2-Methylpyrrole          | 10.07 | 10.23 | -0.16 |
| 2-Methylquinoline        | 18.60 | 18.54 | 0.06  |
| 2-Methylstyrene          | 16.28 | 16.04 | 0.24  |
| 2-Methyltetradecane      | 28.43 | 28.36 | 0.07  |
| 2-Methyltetradecane-2-ol | 28.98 | 28.92 | 0.06  |
| 2-Methyltetrahydrofuran  | 9.80  | 9.85  | -0.05 |
| 2-Methyltetrahydropyran  | 11.70 | 11.69 | 0.01  |
| 2-Methylthiophene        | 11.61 | 11.81 | -0.20 |
| 2-Methyltridecane        | 26.56 | 26.53 | 0.03  |
| 2-Methylundecanal        | 22.78 | 23.06 | -0.28 |
| 2-Methylundecane         | 22.90 | 22.86 | 0.04  |

|                                           |       |       |       |
|-------------------------------------------|-------|-------|-------|
| 2-Naphthyl chlorofluorophosphate          | 23.06 | 23.09 | -0.03 |
| 2-Naphthylamine                           | 19.49 | 19.25 | 0.24  |
| 2-n-Hexoxyethanol                         | 16.84 | 16.76 | 0.08  |
| 2-Nitro-1-butanol                         | 10.96 | 10.92 | 0.04  |
| 2-Nitro-1-propanol                        | 9.23  | 9.09  | 0.14  |
| 2-Nitro-1-propene                         | 8.54  | 8.28  | 0.26  |
| 2-Nitroacetophenone                       | 16.78 | 17.01 | -0.23 |
| 2-Nitrobutane                             | 10.36 | 10.36 | 0.00  |
| 2-Nitroethanol                            | 7.55  | 7.35  | 0.20  |
| 2-Nitroethylbenzene                       | 16.72 | 16.53 | 0.19  |
| 2-Nitrophenol                             | 14.02 | 13.86 | 0.16  |
| 2-Nitropropane                            | 8.56  | 8.53  | 0.03  |
| 2-Nitrotoluene                            | 14.80 | 15.06 | -0.26 |
| 2-Nonanol                                 | 17.62 | 17.93 | -0.31 |
| 2-Nonanone                                | 17.42 | 17.47 | -0.05 |
| 2-Nonenal                                 | 17.76 | 17.49 | 0.27  |
| 2-Nonynoic acid                           | 17.17 | 17.41 | -0.24 |
| 2-Octanamine                              | 16.85 | 16.86 | -0.01 |
| 2-Octanol                                 | 15.96 | 16.09 | -0.13 |
| 2-Octanone                                | 15.52 | 15.64 | -0.12 |
| 2-Octen-1-ol                              | 15.97 | 16.01 | -0.04 |
| 2-Octylnaphthalene                        | 32.53 | 32.39 | 0.14  |
| 2-Octyn-1-ol                              | 15.43 | 15.50 | -0.07 |
| 2-Octyne                                  | 14.79 | 14.94 | -0.15 |
| 2-Octynoic acid                           | 15.33 | 15.57 | -0.24 |
| 2-Oxetanone                               | 6.18  | 6.20  | -0.02 |
| 2-Oxiranylmethanol                        | 6.79  | 6.74  | 0.05  |
| 2-Pentanol                                | 10.59 | 10.59 | 0.00  |
| 2-Pentanone ketazine                      | 21.66 | 21.63 | 0.03  |
| 2-Pentanone O-ethyloxime                  | 15.60 | 15.60 | 0.00  |
| 2-Pentanone O-propyloxime                 | 17.39 | 17.44 | -0.05 |
| 2-Pentanone oxime                         | 11.73 | 11.73 | 0.00  |
| 2-Pentanoylthiophene                      | 19.45 | 19.26 | 0.19  |
| 2-Pentoxy-4-methyl-1,3,2-dioxaphospholane | 19.64 | 19.93 | -0.29 |
| 2-Pentylnaphthalene                       | 26.99 | 26.88 | 0.11  |
| 2-Pentyloxytrimethylsilane                | 19.72 | 19.65 | 0.07  |
| 2-Pentyltetrahydrofuran                   | 17.15 | 17.19 | -0.04 |
| 2-Pentylthiophene                         | 19.03 | 19.15 | -0.12 |
| 2-Pentyn-1-ol                             | 9.89  | 9.99  | -0.10 |
| 2-Pentyne                                 | 9.36  | 9.43  | -0.07 |
| 2-Phenoxy-1-propanol                      | 17.36 | 17.34 | 0.02  |
| 2-Phenoxyethanol                          | 15.45 | 15.50 | -0.05 |



|                                                   |       |       |       |
|---------------------------------------------------|-------|-------|-------|
| 2-Phenoxypropanoyl chloride                       | 18.69 | 18.95 | -0.26 |
| 2-Phenoxyvinyl bis(dibutylamino) phosphorus oxide | 50.34 | 50.27 | 0.07  |
| 2-Phenoxyvinyl bis(diethylamino) phosphorus oxide | 35.96 | 35.59 | 0.37  |
| 2-Phenyl-1,3-butadiene                            | 17.74 | 17.71 | 0.03  |
| 2-Phenyl-1-propanol                               | 16.78 | 16.63 | 0.15  |
| 2-Phenyl-3-methyl-2-butene                        | 19.64 | 19.74 | -0.10 |
| 2-Phenylethylamine                                | 15.37 | 15.61 | -0.24 |
| 2-Phenyloctane                                    | 25.20 | 25.25 | -0.05 |
| 2-Phenylpropionitrile                             | 15.77 | 15.99 | -0.22 |
| 2-Phenyltetradecane                               | 36.26 | 36.26 | 0.00  |
| 2-Phenyltetrahydropyran                           | 19.48 | 19.59 | -0.11 |
| 2-Phenyltoluene                                   | 22.30 | 22.23 | 0.07  |
| 2-Phenylvinyl bis(dipropylamino) phosphorus oxide | 42.64 | 42.40 | 0.24  |
| 2-Phenylvinyl diethoxy phosphorus thioxide        | 29.94 | 29.68 | 0.26  |
| 2-Phenylvinyl dimethoxy phosphorus thioxide       | 26.05 | 25.98 | 0.07  |
| 2-Picoline                                        | 11.41 | 11.57 | -0.16 |
| 2-Propanethiol                                    | 9.49  | 9.39  | 0.10  |
| 2-Propanol                                        | 7.03  | 6.92  | 0.11  |
| 2-Propene-1-thiol                                 | 9.08  | 9.27  | -0.19 |
| 2-Propionylthiophene                              | 15.75 | 15.59 | 0.16  |
| 2-Propoxy-4-methyl-1,3,2-dioxaphospholane         | 16.19 | 16.26 | -0.07 |
| 2-Propoxyethanol                                  | 11.31 | 11.25 | 0.06  |
| 2-Propoxymethylthiophene                          | 17.84 | 17.99 | -0.15 |
| 2-Propoxyvinyl bis(dibutylamino) phosphorus oxide | 45.89 | 46.03 | -0.14 |
| 2-Propyl-1,4-diox-2-ene                           | 13.90 | 13.84 | 0.06  |
| 2-Propyl-1,4-dioxane                              | 14.17 | 14.19 | -0.02 |
| 2-Propyl-2,3-dihydrofuran                         | 13.18 | 13.29 | -0.11 |
| 2-Propyl-2-hydroxy-1,4-dioxane                    | 14.91 | 14.64 | 0.27  |
| 2-Propyl-3-ethyl-1,4-diox-2-ene                   | 17.55 | 17.56 | -0.01 |
| 2-Propyl-4-ethyl-2,3-dihydrofuran                 | 16.82 | 16.99 | -0.17 |
| 2-Propyl-4-ethylpyrrole                           | 17.44 | 17.60 | -0.16 |
| 2-Propyl-4-ethylpyrrolidine                       | 17.75 | 17.81 | -0.06 |
| 2-Propyl-4-isopropylpyrrolidine                   | 19.50 | 19.63 | -0.13 |
| 2-Propyl-4-methyl-2,3-dihydrofuran                | 15.04 | 15.15 | -0.11 |
| 2-Propyl-4-methylpyrrole                          | 15.70 | 15.76 | -0.06 |
| 2-Propyl-4-methylpyrrolidine                      | 15.97 | 15.97 | 0.00  |
| 2-Propyl-5-butylpyrrole                           | 21.21 | 21.23 | -0.02 |
| 2-Propyl-5-butylpyrrolidine                       | 21.31 | 21.47 | -0.16 |
| 2-Propyl-5-hexylpyrrole                           | 24.89 | 24.90 | -0.01 |
| 2-Propyl-5-hexylpyrrolidine                       | 25.04 | 25.14 | -0.10 |
| 2-Propyl-6-methyl-1,4-diox-2-ene                  | 15.75 | 15.68 | 0.07  |
| 2-Propyl-6-methyl-2-hydroxy-1,4-dioxane           | 16.78 | 16.48 | 0.30  |

|                          |       |       |       |
|--------------------------|-------|-------|-------|
| 2-Propylcyclohexanone    | 16.23 | 16.61 | -0.38 |
| 2-Propylheptanoic acid   | 19.77 | 19.82 | -0.05 |
| 2-Propylnaphthalene      | 23.26 | 23.21 | 0.05  |
| 2-Propyloctanoic acid    | 21.61 | 21.66 | -0.05 |
| 2-Propylpentanoic acid   | 16.17 | 16.15 | 0.02  |
| 2-Propylpiperidine       | 16.10 | 15.99 | 0.11  |
| 2-Propylpyridine         | 15.30 | 15.25 | 0.05  |
| 2-Propylpyrrole          | 14.31 | 13.90 | 0.41  |
| 2-Propyltetrahydropyran  | 15.34 | 15.36 | -0.02 |
| 2-Propylthiophene        | 15.32 | 15.48 | -0.16 |
| 2-Propyltoluene          | 17.98 | 18.00 | -0.02 |
| 2-Propyn-1-butyrate      | 13.49 | 13.58 | -0.09 |
| 2-Propyn-1-formate       | 8.02  | 8.13  | -0.11 |
| 2-Propyn-1-heptanoate    | 19.02 | 19.09 | -0.07 |
| 2-Propyn-1-hexanoate     | 17.18 | 17.25 | -0.07 |
| 2-Propyn-1-ol            | 6.08  | 6.10  | -0.02 |
| 2-Propyn-1-valerate      | 15.34 | 15.42 | -0.08 |
| 2-Pyridinecarbonitrile   | 11.69 | 11.49 | 0.20  |
| 2-Pyridinecarboxaldehyde | 11.90 | 11.78 | 0.12  |
| 2-Pyridinemethanamine    | 12.84 | 12.93 | -0.09 |
| 2-Pyridinemethanol       | 12.07 | 12.13 | -0.06 |
| 2-Pyridinepropanol       | 15.84 | 15.80 | 0.04  |
| 2-Pyrone                 | 9.76  | 9.55  | 0.21  |
| 2-Pyrrolidone            | 8.57  | 8.69  | -0.12 |
| 2-s-Butylphenol          | 18.46 | 18.61 | -0.15 |
| 2-Silylpentasilane       | 29.00 | 28.97 | 0.03  |
| 2-Silyltetrasilane       | 24.23 | 24.20 | 0.03  |
| 2-Silyltrisilane         | 19.38 | 19.43 | -0.05 |
| 2-t-Amylnaphthalene      | 26.92 | 26.87 | 0.05  |
| 2-t-Butyl-4-methylphenol | 20.60 | 20.53 | 0.07  |
| 2-t-Butyl-6-methylphenol | 20.43 | 20.53 | -0.10 |
| 2-t-Butylaniline         | 19.43 | 19.53 | -0.10 |
| 2-t-Butylfuran           | 14.85 | 14.91 | -0.06 |
| 2-t-Butylnaphthalene     | 24.93 | 25.04 | -0.11 |
| 2-t-Butylphenol          | 18.39 | 18.62 | -0.23 |
| 2-t-Butyltetrahydropyran | 17.14 | 17.18 | -0.04 |
| 2-t-Butylthiophene       | 16.97 | 17.31 | -0.34 |
| 2-t-Butyltoluene         | 19.68 | 19.82 | -0.14 |
| 2-Tetralone              | 16.95 | 17.26 | -0.31 |
| 2-Thiocresol             | 15.52 | 15.59 | -0.07 |
| 2-Thiopheneacetonitrile  | 13.32 | 13.56 | -0.24 |
| 2-Thiophenecarbaldehyde  | 12.25 | 12.02 | 0.23  |

|                                             |       |       |       |
|---------------------------------------------|-------|-------|-------|
| 2-Thiophenecarbonitrile                     | 11.99 | 11.73 | 0.26  |
| 2-Thiophenemethanol                         | 12.37 | 12.37 | 0.00  |
| 2-Tolunitrile                               | 14.36 | 14.24 | 0.12  |
| 2-Tolyl 3-tolyl propoxyborine               | 32.55 | 32.45 | 0.10  |
| 2-Tolyl 4-tolyl propoxyborine               | 32.61 | 32.45 | 0.16  |
| 2-Tolyl dibutoxyborine                      | 30.20 | 30.30 | -0.10 |
| 2-Tolyl diethoxyborine                      | 22.87 | 22.96 | -0.09 |
| 2-Tolyl dimethoxyborine                     | 19.08 | 19.26 | -0.18 |
| 2-Tolyl dipropoxyborine                     | 26.55 | 26.63 | -0.08 |
| 2-Tridecanone                               | 24.81 | 24.81 | 0.00  |
| 2-Trifluoromethylaniline                    | 14.18 | 14.14 | 0.04  |
| 2-Undecanol                                 | 21.66 | 21.60 | 0.06  |
| 2-Undecanone                                | 21.10 | 21.14 | -0.04 |
| 2-Undecylthiacyclohexane                    | 32.47 | 32.50 | -0.03 |
| 2-Undecyne                                  | 20.29 | 20.44 | -0.15 |
| 2-Vinyl-1,4-dioxane                         | 12.07 | 12.23 | -0.16 |
| 2-Vinylfuran                                | 11.60 | 11.13 | 0.47  |
| 2-Vinyloxymethylthiophene                   | 16.15 | 15.88 | 0.27  |
| 2-Vinylpyridine                             | 13.29 | 13.29 | 0.00  |
| 2-Vinyltetrahydrofuran                      | 11.48 | 11.56 | -0.08 |
| 3-(1-Methyl-2-pyrrolidinyl)pyridine         | 19.62 | 19.50 | 0.12  |
| 3-(2-Furyl)-4-oxa-6-hexanol                 | 17.92 | 17.99 | -0.07 |
| 3-(2-Furyl)-4-oxa-6-hexyl acetate           | 22.86 | 23.05 | -0.19 |
| 3-(4-Methyl-3-pentenyl)furan                | 18.44 | 18.52 | -0.08 |
| 3-(Aminomethyl)-3,5,5-trimethylcyclohexanol | 20.27 | 20.26 | 0.01  |
| 3-(Butylamino)propionitrile                 | 15.03 | 14.95 | 0.08  |
| 3-(Chloromethyl)heptane                     | 17.43 | 17.42 | 0.01  |
| 3-(Chloromethyl)pentane                     | 13.64 | 13.75 | -0.11 |
| 3-(Dibutylamino)propionitrile               | 22.44 | 22.47 | -0.03 |
| 3-(Diethylamino)-1-propanol                 | 16.06 | 15.77 | 0.29  |
| 3-(Diethylamino)propionitrile               | 15.09 | 15.13 | -0.04 |
| 3-(Dimethylamino)butyronitrile              | 12.87 | 13.32 | -0.45 |
| 3-(Dipentylamino)propionitrile              | 26.11 | 26.14 | -0.03 |
| 3-(Dipropylamino)propionitrile              | 18.75 | 18.80 | -0.05 |
| 3-(Ethylamino)propionitrile                 | 11.38 | 11.28 | 0.10  |
| 3-(Hexylamino)propionitrile                 | 18.75 | 18.62 | 0.13  |
| 3-(Methylamino)propionitrile                | 9.62  | 9.46  | 0.16  |
| 3-(Methylthio)-1-propene                    | 11.15 | 11.12 | 0.03  |
| 3-(Pentylamino)propionitrile                | 16.88 | 16.78 | 0.10  |
| 3-(Propylamino)propionitrile                | 13.24 | 13.11 | 0.13  |
| 3-(Triethoxysilyl)-1-propanamine            | 23.48 | 23.48 | 0.00  |
| 3-(Trifluoromethyl)phenyl isocyanate        | 15.35 | 15.31 | 0.04  |

|                                           |       |       |       |
|-------------------------------------------|-------|-------|-------|
| 3-(Trimethylsilyl)-1-propanol             | 16.47 | 16.23 | 0.24  |
| 3,3,3-Trichloro-1-propene                 | 12.03 | 12.07 | -0.04 |
| 3,3,4,4-Tetrafluorodihydro-2,5-furandione | 8.44  | 8.35  | 0.09  |
| 3,3,4,4-Tetramethyl-1,2-dioxetane         | 12.33 | 12.61 | -0.28 |
| 3,3,4,4-Tetramethylhexane                 | 18.96 | 19.19 | -0.23 |
| 3,3,4-Trimethylhexane                     | 17.28 | 17.34 | -0.06 |
| 3,3,5-Trimethylcyclohexanone              | 16.60 | 16.60 | 0.00  |
| 3,3,5-Trimethylcyclohexyl acrylate        | 22.69 | 22.57 | 0.12  |
| 3,3,5-Trimethylheptane                    | 19.02 | 19.18 | -0.16 |
| 3,3'-Bitolyl                              | 24.55 | 24.13 | 0.42  |
| 3,3-Diacetoxy-1-propene                   | 14.72 | 14.90 | -0.18 |
| 3,3-Diethoxy-1-propene                    | 14.64 | 14.85 | -0.21 |
| 3,3-Diethoxy-1-propyne                    | 14.20 | 14.16 | 0.04  |
| 3,3'-Difluorobiphenyl                     | 20.68 | 20.24 | 0.44  |
| 3,3-Dimethoxy-1-propene                   | 11.27 | 11.15 | 0.12  |
| 3,3-Dimethyl-1-butanol                    | 12.45 | 12.41 | 0.04  |
| 3,3-Dimethyl-1-butene                     | 11.73 | 11.73 | 0.00  |
| 3,3-Dimethyl-1-pentene                    | 13.48 | 13.56 | -0.08 |
| 3,3-Dimethyl-2-butanol                    | 12.48 | 12.42 | 0.06  |
| 3,3-Dimethyl-2-butylamine                 | 12.97 | 13.18 | -0.21 |
| 3,3-Dimethylbutanoic acid                 | 12.49 | 12.49 | 0.00  |
| 3,3-Dimethylbutanoyl chloride             | 13.97 | 14.02 | -0.05 |
| 3,3-Dimethylcyclohexanol                  | 15.27 | 15.24 | 0.03  |
| 3,3-Dimethylcyclohexanone                 | 14.74 | 14.78 | -0.04 |
| 3,3-Dimethylheptane                       | 17.31 | 17.36 | -0.05 |
| 3,3-Dimethylhexane                        | 15.46 | 15.52 | -0.06 |
| 3,3-Dimethylhexanoic acid                 | 16.10 | 16.16 | -0.06 |
| 3,3-Dimethyloxetane                       | 9.85  | 9.84  | 0.01  |
| 3,3-Dimethylpentane                       | 13.60 | 13.69 | -0.09 |
| 3,3-Dimethylpentanoic acid                | 14.27 | 14.32 | -0.05 |
| 3,4,5-Trimethylheptane                    | 19.10 | 19.15 | -0.05 |
| 3,4-Dibromoheptane                        | 19.85 | 19.87 | -0.02 |
| 3,4-Dibromohexane                         | 17.88 | 18.04 | -0.16 |
| 3,4-Dichloro-1,4-dioxane                  | 12.43 | 12.58 | -0.15 |
| 3,4-Dichloro-1-butene                     | 12.24 | 11.86 | 0.38  |
| 3,4-Dichlorotoluene                       | 16.11 | 16.24 | -0.13 |
| 3,4-Diethylhexane                         | 19.06 | 19.17 | -0.11 |
| 3,4-Dihydro-1H-2-benzopyran               | 15.75 | 15.98 | -0.23 |
| 3,4-Dihydro-2H-1-benzopyran               | 15.67 | 16.00 | -0.33 |
| 3,4-Dihydro-2H-1-benzopyran-2-one         | 16.16 | 16.02 | 0.14  |
| 3,4-Dihydro-2-methoxy-2H-pyran            | 11.90 | 12.04 | -0.14 |
| 3,4-Dihydro-2-methyl-1(2H)-naphthalenone  | 19.24 | 19.07 | 0.17  |

|                                       |       |       |       |
|---------------------------------------|-------|-------|-------|
| 3,4-Dihydro-4H-pyran                  | 9.55  | 9.61  | -0.06 |
| 3,4-Dihydroxytoluene                  | 13.73 | 13.82 | -0.09 |
| 3,4-Dimethoxybenzenemethanol          | 18.17 | 18.15 | 0.02  |
| 3,4-Dimethoxytoluene                  | 17.61 | 17.59 | 0.02  |
| 3,4-Dimethyl-1-pentene                | 13.58 | 13.54 | 0.04  |
| 3,4-Dimethylacetophenone              | 18.31 | 18.17 | 0.14  |
| 3,4-Dimethylheptane                   | 17.25 | 17.33 | -0.08 |
| 3,4-Dimethylhexane                    | 15.49 | 15.50 | -0.01 |
| 3,4-Dimethyloctane                    | 19.19 | 19.17 | 0.02  |
| 3,4-Dimethylthiophene                 | 13.63 | 13.56 | 0.07  |
| 3,4-Hexanedione                       | 11.99 | 12.07 | -0.08 |
| 3,4-Lutidine                          | 13.68 | 13.41 | 0.27  |
| 3,5,5-Trimethyl-1,1-hexanedithiol     | 23.48 | 23.40 | 0.08  |
| 3,5,5-Trimethyl-1-hexanol             | 17.94 | 17.90 | 0.04  |
| 3,5,5-Trimethyl-2-cyclohexenone       | 16.72 | 16.57 | 0.15  |
| 3,5-Bis(trifluoromethyl)aniline       | 15.89 | 16.16 | -0.27 |
| 3,5-Diethyltoluene                    | 19.85 | 19.90 | -0.05 |
| 3,5-Dimethoxytoluene                  | 17.60 | 17.59 | 0.01  |
| 3,5-Dimethyl-1-hexen-3-ol             | 15.80 | 15.93 | -0.13 |
| 3,5-Dimethyl-2-cyclohexen-1-one       | 14.91 | 14.72 | 0.19  |
| 3,5-Dimethyl-4-heptanol               | 17.61 | 17.90 | -0.29 |
| 3,5-Dimethylanisole                   | 16.80 | 16.91 | -0.11 |
| 3,5-Dimethylheptan-4-one              | 17.40 | 17.44 | -0.04 |
| 3,5-Dimethylheptane                   | 17.37 | 17.33 | 0.04  |
| 3,5-Dimethylisoxazole                 | 10.29 | 10.29 | 0.00  |
| 3,5-Lupetidine                        | 14.01 | 14.15 | -0.14 |
| 3,5-Lutidine                          | 13.40 | 13.41 | -0.01 |
| 3,5-Xylidine                          | 15.81 | 15.94 | -0.13 |
| 3,6-Dibromononane                     | 23.51 | 23.54 | -0.03 |
| 3,6-Dihydro-4-methyl-2H-pyran         | 11.45 | 11.63 | -0.18 |
| 3,6-Dimethyl-3-heptene                | 17.23 | 17.30 | -0.07 |
| 3,6-Dimethyl-3-octanol                | 19.69 | 19.72 | -0.03 |
| 3,6-Dimethyloctane                    | 19.24 | 19.17 | 0.07  |
| 3,7,11-Trimethyl-2,6,10-dodecatrienal | 28.75 | 28.43 | 0.32  |
| 3,7-Dimethyl-1,3,7-octatriene         | 19.39 | 18.98 | 0.41  |
| 3,7-Dimethyl-1,7-octanediol           | 20.19 | 20.28 | -0.09 |
| 3,7-Dimethyl-1-octanol                | 19.80 | 19.73 | 0.07  |
| 3,7-Dimethyl-1-octene                 | 19.07 | 19.05 | 0.02  |
| 3,7-Dimethyl-3-octanol                | 19.74 | 19.72 | 0.02  |
| 3-Acetyldihydro-2(3H)-furanone        | 11.71 | 11.80 | -0.09 |
| 3-Allylpiperidine                     | 15.61 | 15.88 | -0.27 |
| 3-Amino-1,2-propanediol,              | 8.90  | 8.84  | 0.06  |

|                                     |       |       |       |
|-------------------------------------|-------|-------|-------|
| 3-Aminobutyronitrile                | 9.17  | 9.47  | -0.30 |
| 3-Aminopentane                      | 11.34 | 11.36 | -0.02 |
| 3-Aminopropionitrile                | 7.63  | 7.63  | 0.00  |
| 3-Anisaldehyde                      | 15.44 | 15.21 | 0.23  |
| 3-Bromo-1,1,2-trichloro-1-propene   | 15.17 | 15.14 | 0.03  |
| 3-Bromo-1,1-dichloro-1-propene      | 13.45 | 13.19 | 0.26  |
| 3-Bromo-1-propanol                  | 10.24 | 9.98  | 0.26  |
| 3-Bromo-2-methylnonane              | 22.10 | 22.27 | -0.17 |
| 3-Bromo-3-methylpentane             | 14.93 | 14.99 | -0.06 |
| 3-Bromo-4,5-dihydro-2(3H)-furanone  | 10.79 | 11.12 | -0.33 |
| 3-Bromoaniline                      | 15.29 | 15.13 | 0.16  |
| 3-Bromoanisole                      | 16.34 | 16.11 | 0.23  |
| 3-Bromochlorobenzene                | 15.43 | 15.43 | 0.00  |
| 3-Bromocyclohexene                  | 14.24 | 14.02 | 0.22  |
| 3-Bromofuran                        | 10.31 | 10.47 | -0.16 |
| 3-Bromohexane                       | 14.83 | 14.95 | -0.12 |
| 3-Bromonitrobenzene                 | 16.03 | 16.17 | -0.14 |
| 3-Bromononane                       | 20.59 | 20.45 | 0.14  |
| 3-Bromopentane                      | 13.10 | 13.11 | -0.01 |
| 3-Bromopropanenitrile               | 9.34  | 9.34  | 0.00  |
| 3-Bromopropyne                      | 8.67  | 8.61  | 0.06  |
| 3-Bromopyridine                     | 12.48 | 12.61 | -0.13 |
| 3-Bromothiophene                    | 12.61 | 12.77 | -0.16 |
| 3-Bromotoluene                      | 15.34 | 15.43 | -0.09 |
| 3-Buten-1-ol                        | 8.63  | 8.63  | 0.00  |
| 3-Buten-2-one                       | 7.94  | 8.17  | -0.23 |
| 3-Butenoic acid                     | 8.63  | 8.70  | -0.07 |
| 3-Butoxypropanenitrile              | 14.30 | 14.28 | 0.02  |
| 3-Butyn-1-ol                        | 7.92  | 7.94  | -0.02 |
| 3-Butyn-2-ol                        | 8.17  | 7.94  | 0.23  |
| 3-Butyn-2-one                       | 7.56  | 7.49  | 0.07  |
| 3-Butynylbenzene                    | 16.97 | 17.12 | -0.15 |
| 3-Carene                            | 17.59 | 17.41 | 0.18  |
| 3-Chloro-(1,1'-biphenyl)-2-ol       | 23.09 | 22.93 | 0.16  |
| 3-Chloro-1,1,1-trifluoropropane     | 8.20  | 8.37  | -0.17 |
| 3-Chloro-1,1-diethoxypropane        | 17.04 | 16.87 | 0.17  |
| 3-Chloro-1-butanol                  | 10.38 | 10.64 | -0.26 |
| 3-Chloro-1-butene                   | 10.01 | 9.95  | 0.06  |
| 3-Chloro-1-propanol                 | 8.84  | 8.82  | 0.02  |
| 3-Chloro-2-(chloromethyl)-1-propene | 11.85 | 11.90 | -0.05 |
| 3-Chloro-2,5-furandione             | 10.01 | 9.92  | 0.09  |
| 3-Chloro-2-butanone                 | 10.17 | 10.18 | -0.01 |

|                                        |       |       |       |
|----------------------------------------|-------|-------|-------|
| 3-Chloro-2-methylpropene               | 10.10 | 10.00 | 0.10  |
| 3-Chloro-3,4-epoxy-1-methylcyclohexane | 14.75 | 14.73 | 0.02  |
| 3-Chloroacetophenone                   | 16.08 | 16.27 | -0.19 |
| 3-Chloroaniline                        | 14.04 | 14.04 | 0.00  |
| 3-Chloroanisole                        | 15.00 | 15.01 | -0.01 |
| 3-Chlorobenzaldehyde                   | 14.63 | 14.54 | 0.09  |
| 3-Chlorobenzeneacetonitrile            | 16.06 | 16.08 | -0.02 |
| 3-Chlorobenzotrichloride               | 20.06 | 20.16 | -0.10 |
| 3-Chlorobenzyl chloride                | 16.15 | 16.23 | -0.08 |
| 3-Chlorobiphenyl                       | 22.63 | 22.23 | 0.40  |
| 3-Chlorobutanoic acid                  | 10.38 | 10.71 | -0.33 |
| 3-Chlorocrotonic acid                  | 11.12 | 10.65 | 0.47  |
| 3-Chlorocyclopentene                   | 10.94 | 10.98 | -0.04 |
| 3-Chloroheptane                        | 15.63 | 15.58 | 0.05  |
| 3-Chlorohexane                         | 13.83 | 13.75 | 0.08  |
| 3-Chloropentane                        | 11.94 | 11.91 | 0.03  |
| 3-Chloropentanoic acid                 | 12.57 | 12.55 | 0.02  |
| 3-Chlorophenol                         | 13.17 | 13.12 | 0.05  |
| 3-Chloropropane-1,2-diyl dinitrate     | 14.19 | 14.30 | -0.11 |
| 3-Chloropropanoyl chloride             | 10.26 | 10.42 | -0.16 |
| 3-Chloropropionitrile                  | 8.02  | 8.17  | -0.15 |
| 3-Chloropropyl chloroformate           | 12.83 | 12.78 | 0.05  |
| 3-Chloropropyne                        | 7.48  | 7.45  | 0.03  |
| 3-Chlorostyrene                        | 16.16 | 16.04 | 0.12  |
| 3-Chlorotoluene                        | 14.22 | 14.33 | -0.11 |
| 3-Cyclohexene-1-carboxaldehyde         | 12.67 | 12.96 | -0.29 |
| 3-Cyclohexene-1-carboxylic acid        | 13.16 | 13.39 | -0.23 |
| 3-Cyclohexyl-1-propyne                 | 17.48 | 17.53 | -0.05 |
| 3-Cyclohexylhexane                     | 21.68 | 21.99 | -0.31 |
| 3-Decanol                              | 19.76 | 19.76 | 0.00  |
| 3-Decanone                             | 19.21 | 19.31 | -0.10 |
| 3-Decen-2-one                          | 19.32 | 19.23 | 0.09  |
| 3-Dimethylamino-1-propanol             | 12.26 | 12.13 | 0.13  |
| 3-Ethoxybenzaldehyde                   | 17.37 | 17.06 | 0.31  |
| 3-Ethoxypropanenitrile                 | 10.41 | 10.61 | -0.20 |
| 3-Ethoxytoluene                        | 17.10 | 16.85 | 0.25  |
| 3-Ethyl-1-pentene                      | 13.59 | 13.56 | 0.03  |
| 3-Ethyl-2,4-dimethyl-1H-pyrrole        | 15.63 | 15.79 | -0.16 |
| 3-Ethyl-2,4-pentanedione               | 14.07 | 13.89 | 0.18  |
| 3-Ethyl-2,5-dimethylpyrazine           | 16.48 | 16.45 | 0.03  |
| 3-Ethyl-2-methyl-1-pentene             | 15.31 | 15.42 | -0.11 |
| 3-Ethyl-2-methylhexane                 | 17.26 | 17.33 | -0.07 |

|                          |       |       |       |
|--------------------------|-------|-------|-------|
| 3-Ethyl-2-methylpentane  | 15.40 | 15.50 | -0.10 |
| 3-Ethyl-2-pentene        | 13.53 | 13.64 | -0.11 |
| 3-Ethyl-3-methylhexane   | 17.24 | 17.36 | -0.12 |
| 3-Ethyl-3-methylpentane  | 15.35 | 15.52 | -0.17 |
| 3-Ethyl-4-methylhexane   | 17.10 | 17.33 | -0.23 |
| 3-Ethyl-6-nonanone       | 20.89 | 21.13 | -0.24 |
| 3-Ethyldecane            | 22.85 | 22.86 | -0.01 |
| 3-Ethylheptane           | 17.41 | 17.35 | 0.06  |
| 3-Ethylhexane            | 15.44 | 15.52 | -0.08 |
| 3-Ethyl-octane           | 19.22 | 19.19 | 0.03  |
| 3-Ethyl-o-xylene         | 17.97 | 18.07 | -0.10 |
| 3-Ethylpentane           | 13.59 | 13.68 | -0.09 |
| 3-Ethylpyridine          | 13.14 | 13.34 | -0.20 |
| 3-Ethylstyrene           | 18.23 | 17.87 | 0.36  |
| 3-Ethyltoluene           | 16.12 | 16.16 | -0.04 |
| 3-Fluoroaniline          | 12.02 | 12.09 | -0.07 |
| 3-Fluoroanisole          | 13.04 | 13.06 | -0.02 |
| 3-Fluorobenzaldehyde     | 12.80 | 12.59 | 0.21  |
| 3-Fluorobenzoyl chloride | 14.85 | 14.54 | 0.31  |
| 3-Fluoronitrobenzene     | 12.96 | 13.12 | -0.16 |
| 3-Fluorophenetole        | 14.85 | 14.90 | -0.05 |
| 3-Fluorophenol           | 10.81 | 11.17 | -0.36 |
| 3-Fluoropyridine         | 9.54  | 9.56  | -0.02 |
| 3-Fluorotoluene          | 12.19 | 12.38 | -0.19 |
| 3-Furancarboxaldehyde    | 10.00 | 9.60  | 0.40  |
| 3-Heptanol               | 14.17 | 14.26 | -0.09 |
| 3-Heptanone              | 13.58 | 13.80 | -0.22 |
| 3-Heptyne                | 13.12 | 13.10 | 0.02  |
| 3-Heptynoic acid         | 13.56 | 13.74 | -0.18 |
| 3-Hexanol                | 12.44 | 12.42 | 0.02  |
| 3-Hexanone               | 11.87 | 11.97 | -0.10 |
| 3-Hexanone ketazine      | 25.33 | 25.30 | 0.03  |
| 3-Hexanone O-ethyloxime  | 17.44 | 17.44 | 0.00  |
| 3-Hexanone O-propyloxime | 19.26 | 19.27 | -0.01 |
| 3-Hexanone oxime         | 13.55 | 13.57 | -0.02 |
| 3-Hexyloxypropanenitrile | 18.00 | 17.95 | 0.05  |
| 3-Hexyn-1-ol             | 11.71 | 11.82 | -0.11 |
| 3-Hexyne                 | 11.19 | 11.27 | -0.08 |
| 3-Hexyne-2,5-diol        | 12.38 | 12.39 | -0.01 |
| 3-Hydroxyacetophenone    | 15.28 | 15.06 | 0.22  |
| 3-Hydroxydiphenylether   | 21.82 | 21.72 | 0.10  |
| 3-Hydroxypropylphosphine | 10.74 | 10.87 | -0.13 |



|                                                                  |       |       |       |
|------------------------------------------------------------------|-------|-------|-------|
| 3-Iodo-1-propanol                                                | 11.91 | 12.02 | -0.11 |
| 3-Iodopentane                                                    | 15.21 | 15.26 | -0.05 |
| 3-Iodotoluene                                                    | 17.47 | 17.40 | 0.07  |
| 3-Isopropyl-2-methyldecane                                       | 26.43 | 26.50 | -0.07 |
| 3-Isopropyl-2-methyldodecane                                     | 30.12 | 30.17 | -0.05 |
| 3-Isopropyl-2-methylheptane                                      | 20.91 | 20.99 | -0.08 |
| 3-Isopropyl-2-methylnonane                                       | 24.60 | 24.66 | -0.06 |
| 3-Isopropyl-2-methyloctane                                       | 22.76 | 22.82 | -0.06 |
| 3-Isopropyl-2-methylundecane                                     | 28.26 | 28.33 | -0.07 |
| 3-Isopropyltoluene                                               | 17.96 | 17.98 | -0.02 |
| 3-Mercaptopropyl-trimethoxysilane                                | 19.61 | 19.62 | -0.01 |
| 3-Methoxy-1,2-propanediol                                        | 9.99  | 9.97  | 0.02  |
| 3-Methoxy-1-butanol                                              | 11.19 | 11.25 | -0.06 |
| 3-Methoxyacetophenone                                            | 17.12 | 16.95 | 0.17  |
| 3-Methoxybenzenemethanol                                         | 15.55 | 15.56 | -0.01 |
| 3-Methoxybenzonitrile                                            | 15.21 | 14.92 | 0.29  |
| 3-Methoxyphenol                                                  | 13.88 | 13.80 | 0.08  |
| 3-Methoxyphenylacetone                                           | 18.39 | 18.78 | -0.39 |
| 3-Methoxypropionitrile                                           | 8.80  | 8.76  | 0.04  |
| 3-Methoxypyridine                                                | 12.10 | 12.19 | -0.09 |
| 3-Methoxytoluene                                                 | 15.02 | 15.00 | 0.02  |
| 3-Methyl-1,2-butadiene                                           | 10.04 | 10.04 | 0.00  |
| 3-Methyl-1,3-pentadiene                                          | 12.03 | 11.69 | 0.34  |
| 3-Methyl-1,5-dibromopentane                                      | 17.88 | 17.98 | -0.10 |
| 3-methyl-1,5-pentanediol                                         | 13.01 | 12.96 | 0.05  |
| 3-Methyl-1-butanethiol                                           | 13.07 | 13.05 | 0.02  |
| 3-Methyl-1-butene                                                | 9.98  | 9.89  | 0.09  |
| 3-Methyl-1-butyne                                                | 9.22  | 9.20  | 0.02  |
| 3-Methyl-1-heptanol                                              | 16.17 | 16.07 | 0.10  |
| 3-Methyl-1-hexene                                                | 13.63 | 13.56 | 0.07  |
| 3-Methyl-1-hexylamine                                            | 15.12 | 15.04 | 0.08  |
| 3-Methyl-1H-indene                                               | 17.22 | 17.10 | 0.12  |
| 3-Methyl-1H-pyrazole                                             | 9.25  | 9.11  | 0.14  |
| 3-Methyl-1-octyn-3-ol                                            | 17.24 | 17.10 | 0.14  |
| 3-Methyl-1-pentanol                                              | 12.21 | 12.40 | -0.19 |
| 3-Methyl-1-pentene                                               | 11.69 | 11.72 | -0.03 |
| 3-Methyl-1-pentyn-3-ol                                           | 11.59 | 11.59 | 0.00  |
| 3-Methyl-1-phenyl-1-butanone                                     | 19.95 | 19.85 | 0.10  |
| 3-Methyl-1-propylpyridinium<br>bis(trifluoromethylsulfonyl)amide | 30.28 | 30.30 | -0.02 |
| 3-Methyl-2,5-furandione                                          | 9.96  | 9.83  | 0.13  |
| 3-Methyl-2-butanol                                               | 10.56 | 10.57 | -0.01 |

|                                        |       |       |       |
|----------------------------------------|-------|-------|-------|
| 3-Methyl-2-butanone                    | 10.01 | 10.12 | -0.11 |
| 3-Methyl-2-buten-1-ol                  | 10.64 | 10.53 | 0.11  |
| 3-Methyl-2-butenal                     | 10.33 | 10.18 | 0.15  |
| 3-Methyl-2-butenoyl chloride           | 12.47 | 12.14 | 0.33  |
| 3-Methyl-2-cyclohexen-1-one            | 13.13 | 12.90 | 0.23  |
| 3-Methyl-2-cyclopenten-1-one           | 10.98 | 11.07 | -0.09 |
| 3-Methyl-2-heptanol                    | 15.97 | 16.08 | -0.11 |
| 3-Methyl-2-hexanol                     | 14.18 | 14.24 | -0.06 |
| 3-Methyl-2-oxazolidinone               | 9.28  | 9.49  | -0.21 |
| 3-Methyl-2-oxobutanoic acid            | 10.82 | 10.75 | 0.07  |
| 3-Methyl-2-pentanol                    | 12.29 | 12.41 | -0.12 |
| 3-Methyl-2-pentanone                   | 11.84 | 11.95 | -0.11 |
| 3-Methyl-2-pentyl-2-cyclopenten-1-one  | 20.31 | 20.27 | 0.04  |
| 3-Methyl-3-buten-2-ol                  | 10.31 | 10.49 | -0.18 |
| 3-Methyl-3-heptanol                    | 16.03 | 16.07 | -0.04 |
| 3-Methyl-3-hexanol                     | 14.25 | 14.23 | 0.02  |
| 3-Methyl-3-octanol                     | 18.06 | 17.91 | 0.15  |
| 3-Methyl-3-pentanol                    | 12.33 | 12.40 | -0.07 |
| 3-Methyl-3-penten-1-yne                | 11.17 | 11.00 | 0.17  |
| 3-Methyl-4-heptanol                    | 15.72 | 16.08 | -0.36 |
| 3-Methyl-5-hepten-2-one                | 15.41 | 15.54 | -0.13 |
| 3-Methyl-6-isopropyl-2-cyclohexen-1-ol | 18.81 | 18.83 | -0.02 |
| 3-Methyl-6-nonanone                    | 19.35 | 19.29 | 0.06  |
| 3-Methylbenzaldehyde                   | 14.69 | 14.53 | 0.16  |
| 3-Methylbenzenemethanamine             | 15.51 | 15.69 | -0.18 |
| 3-Methylbenzoic acid                   | 15.29 | 14.96 | 0.33  |
| 3-Methylbutanaloxime                   | 11.75 | 11.80 | -0.05 |
| 3-Methylbutanoic acid                  | 10.62 | 10.64 | -0.02 |
| 3-Methylbutanoyl chloride              | 12.16 | 12.17 | -0.01 |
| 3-Methylbutyl 3-chloropropionate       | 18.14 | 18.11 | 0.03  |
| 3-Methylbutyl nitrate                  | 13.19 | 13.03 | 0.16  |
| 3-Methylbutyl trichloroacetate         | 20.28 | 20.21 | 0.07  |
| 3-Methyl-cis-2-pentene                 | 11.78 | 11.81 | -0.03 |
| 3-Methylcyclohexanone                  | 12.97 | 12.94 | 0.03  |
| 3-Methylcyclohexene                    | 12.61 | 12.75 | -0.14 |
| 3-Methylcyclohexyl acrylate            | 18.96 | 18.91 | 0.05  |
| 3-Methylcyclopentanol                  | 11.64 | 11.56 | 0.08  |
| 3-Methylcyclopentanone                 | 11.07 | 11.10 | -0.03 |
| 3-Methylcyclopentene                   | 10.92 | 10.92 | 0.00  |
| 3-Methyldecane                         | 21.03 | 21.02 | 0.01  |
| 3-Methyldihydro-2,5-furandione         | 10.10 | 9.87  | 0.23  |
| 3-Methyldodecane                       | 24.68 | 24.69 | -0.01 |

|                              |       |       |       |
|------------------------------|-------|-------|-------|
| 3-Methyleicosane             | 39.39 | 39.37 | 0.02  |
| 3-Methyleneheptane           | 15.34 | 15.44 | -0.10 |
| 3-Methylfuran                | 9.16  | 9.40  | -0.24 |
| 3-Methylheneicosane          | 41.27 | 41.21 | 0.06  |
| 3-Methylheptadecane          | 33.91 | 33.87 | 0.04  |
| 3-Methylheptane              | 15.51 | 15.52 | -0.01 |
| 3-Methylhexadecane           | 32.05 | 32.03 | 0.02  |
| 3-Methylhexanal              | 13.74 | 13.89 | -0.15 |
| 3-Methylhexane               | 13.56 | 13.68 | -0.12 |
| 3-Methylhexanoic acid        | 14.27 | 14.31 | -0.04 |
| 3-Methylmethylenecyclohexane | 14.74 | 14.57 | 0.17  |
| 3-Methylnonadecane           | 37.58 | 37.54 | 0.04  |
| 3-Methylnonane               | 19.10 | 19.19 | -0.09 |
| 3-Methyloctadecane           | 35.75 | 35.70 | 0.05  |
| 3-Methyloctane               | 17.34 | 17.35 | -0.01 |
| 3-Methylpentadecane          | 30.23 | 30.20 | 0.03  |
| 3-Methylpentadecane-3-ol     | 30.77 | 30.75 | 0.02  |
| 3-Methylpentane              | 11.81 | 11.84 | -0.03 |
| 3-Methylpiperidine           | 12.44 | 12.33 | 0.11  |
| 3-Methylpyridazine           | 10.76 | 10.75 | 0.01  |
| 3-Methylpyridine             | 11.43 | 11.51 | -0.08 |
| 3-Methylquinoline            | 18.61 | 18.47 | 0.14  |
| 3-Methylstyrene              | 16.22 | 16.04 | 0.18  |
| 3-Methylsulfolane            | 12.66 | 12.63 | 0.03  |
| 3-Methyltetradecane          | 28.40 | 28.36 | 0.04  |
| 3-Methylthiophene            | 11.58 | 11.70 | -0.12 |
| 3-Methyl-trans-2-pentene     | 11.78 | 11.81 | -0.03 |
| 3-Methyltridecane            | 26.47 | 26.53 | -0.06 |
| 3-Methylundecane             | 22.87 | 22.86 | 0.01  |
| 3-Methylvaleric acid         | 12.47 | 12.48 | -0.01 |
| 3-Nitro-2-butanol            | 11.08 | 10.92 | 0.16  |
| 3-Nitrobenzotrifluoride      | 14.77 | 15.17 | -0.40 |
| 3-Nitrobenzylalcohol         | 15.51 | 15.62 | -0.11 |
| 3-Nitrotoluene               | 14.88 | 15.06 | -0.18 |
| 3-Nonanol                    | 17.87 | 17.93 | -0.06 |
| 3-Nonanone                   | 17.34 | 17.47 | -0.13 |
| 3-Nonenoic acid              | 17.83 | 17.92 | -0.09 |
| 3-Octanol                    | 16.00 | 16.09 | -0.09 |
| 3-Octanone                   | 15.48 | 15.64 | -0.16 |
| 3-Octyne                     | 14.84 | 14.94 | -0.10 |
| 3-Oxa-5-oxo-1-octanol        | 14.98 | 15.03 | -0.05 |
| 3-Pentanethiol               | 13.07 | 13.06 | 0.01  |

|                                            |       |       |       |
|--------------------------------------------|-------|-------|-------|
| 3-Pentanol                                 | 10.56 | 10.59 | -0.03 |
| 3-Pentanone ketazine                       | 21.59 | 21.63 | -0.04 |
| 3-Pentanone O-ethyloxime                   | 15.55 | 15.60 | -0.05 |
| 3-Pentanone O-propyloxime                  | 17.36 | 17.44 | -0.08 |
| 3-Pentanone oxime                          | 11.73 | 11.73 | 0.00  |
| 3-Penten-2-ol                              | 10.55 | 10.51 | 0.04  |
| 3-Pentyloxypropanenitrile                  | 16.15 | 16.12 | 0.03  |
| 3-Pentyn-1-ol                              | 9.87  | 9.99  | -0.12 |
| 3-Phenoxybenzaldehyde                      | 23.29 | 23.13 | 0.16  |
| 3-Phenyl-2-propyn-1-ol                     | 16.34 | 16.05 | 0.29  |
| 3-Phenylpropene                            | 15.79 | 15.97 | -0.18 |
| 3-Phenylpropylthiol                        | 19.02 | 19.13 | -0.11 |
| 3-Phenyltoluene                            | 22.32 | 22.23 | 0.09  |
| 3-Piperidinemethanol                       | 13.01 | 12.89 | 0.12  |
| 3-Propoxy-1-propene                        | 12.17 | 12.41 | -0.24 |
| 3-Propoxypropanenitrile                    | 12.47 | 12.45 | 0.02  |
| 3-Propyltoluene                            | 18.06 | 18.00 | 0.06  |
| 3-Pyridinemethanamine                      | 12.88 | 12.87 | 0.01  |
| 3-Pyridinemethanol                         | 12.10 | 12.07 | 0.03  |
| 3-Pyridinepropanol                         | 15.84 | 15.74 | 0.10  |
| 3-t-Butylfuran                             | 14.70 | 14.90 | -0.20 |
| 3-t-Butylthiophene                         | 17.12 | 17.20 | -0.08 |
| 3-t-Butyltoluene                           | 19.78 | 19.82 | -0.04 |
| 3-Thiocresol                               | 15.52 | 15.59 | -0.07 |
| 3-Thiopropionic acid                       | 10.06 | 10.03 | 0.03  |
| 3-Tolunitrile                              | 13.80 | 14.24 | -0.44 |
| 3-Tolyl dibutoxyborine                     | 30.32 | 30.30 | 0.02  |
| 3-Tolyl diethoxyborine                     | 23.02 | 22.96 | 0.06  |
| 3-Tolyl dimethoxyborine                    | 19.18 | 19.26 | -0.08 |
| 3-Tolyl dipropoxyborine                    | 26.66 | 26.63 | 0.03  |
| 3-Tolylphosphorous diaziridide             | 25.24 | 25.25 | -0.01 |
| 3-Trifluoromethylaniline                   | 13.87 | 14.14 | -0.27 |
| 3-Trifluoromethylbenzonitrile              | 14.25 | 14.35 | -0.10 |
| 3-Trifluoromethylbenzoyl chloride          | 16.89 | 16.60 | 0.29  |
| 3-Vinyl-7-oxabicyclo[4.1.0]heptane         | 14.33 | 14.37 | -0.04 |
| 3-Vinylpyridine                            | 13.50 | 13.22 | 0.28  |
| 4-(1,1-Dimethylpropyl)cyclohexanone        | 20.15 | 20.27 | -0.12 |
| 4(10)-Thujene-3-ol                         | 18.30 | 17.93 | 0.37  |
| 4-(1-Butylpentyl)pyridine                  | 26.26 | 26.17 | 0.09  |
| 4-(1-Ethylpropyl)pyridine                  | 18.84 | 18.83 | 0.01  |
| 4-(1-Methylvinyl)-1-cyclohexene-1-methanol | 16.64 | 16.89 | -0.25 |
| 4-(2-Furanyl)-2-butanone                   | 14.74 | 15.03 | -0.29 |

|                                        |       |       |       |
|----------------------------------------|-------|-------|-------|
| 4-(3-Cyclohexen-1-yl)pyridine          | 19.57 | 19.74 | -0.17 |
| 4-(3-Phenylpropyl)pyridine             | 24.75 | 24.91 | -0.16 |
| 4-(Ethylthio)-toluene                  | 19.38 | 19.46 | -0.08 |
| 4-(Methylthio)aniline                  | 17.46 | 17.24 | 0.22  |
| 4-(Pentyloxy)benzoyl chloride          | 24.45 | 24.52 | -0.07 |
| 4,4'-Diisocyanatodiphenylmethane       | 27.99 | 27.72 | 0.27  |
| 4,4-Dimethyl-1-pentene                 | 13.26 | 13.56 | -0.30 |
| 4,4-Dimethyl-1-pentyne                 | 12.89 | 12.88 | 0.01  |
| 4,4-Dimethyl-2-pentanone               | 13.67 | 13.79 | -0.12 |
| 4,4-Dimethyl-2-pentyne                 | 13.08 | 13.09 | -0.01 |
| 4,4-Dimethylcyclohexanone              | 14.53 | 14.78 | -0.25 |
| 4,4-Dimethylheptane                    | 17.35 | 17.36 | -0.01 |
| 4,5-Dichloro-1,3-dioxolan-2-one        | 10.78 | 10.68 | 0.10  |
| 4,5-Diethyloctane                      | 22.76 | 22.84 | -0.08 |
| 4,5-Dihydro-2-methylthiazole           | 11.42 | 11.55 | -0.13 |
| 4-Acetylmorpholine                     | 13.11 | 13.17 | -0.06 |
| 4-Acetylpyridine                       | 13.48 | 13.45 | 0.03  |
| 4-Allyl anisole                        | 18.49 | 18.55 | -0.06 |
| 4-Allyl-2-methoxyphenol                | 19.19 | 19.25 | -0.06 |
| 4-Allyl-2-methoxyphenyl acetate        | 23.02 | 23.00 | 0.02  |
| 4-Allylphenol                          | 16.46 | 16.67 | -0.21 |
| 4-Amino-1-butanol                      | 10.06 | 10.11 | -0.05 |
| 4-Benzylpiperidine                     | 21.65 | 22.07 | -0.42 |
| 4-Benzylpyridine                       | 21.09 | 21.24 | -0.15 |
| 4-Bromo-1,2-butadiene                  | 11.33 | 11.24 | 0.09  |
| 4-Bromo-1,2-dimethoxybenzene           | 18.91 | 18.69 | 0.22  |
| 4-Bromo-1-butene                       | 11.13 | 11.13 | 0.00  |
| 4-Bromo-2-methylhexane                 | 16.78 | 16.77 | 0.01  |
| 4-Bromoacetophenone                    | 17.41 | 17.37 | 0.04  |
| 4-Bromoanisole                         | 16.56 | 16.11 | 0.45  |
| 4-Bromobutyronitrile                   | 11.17 | 11.17 | 0.00  |
| 4-Bromocrotonic acid ethylester        | 15.85 | 15.54 | 0.31  |
| 4-Bromodiphenyl ether                  | 24.20 | 24.03 | 0.17  |
| 4-Bromophenyltrimethylsilane           | 22.67 | 22.91 | -0.24 |
| 4-Bromopyridine                        | 12.48 | 12.61 | -0.13 |
| 4-Bromotetradecane                     | 29.28 | 29.63 | -0.35 |
| 4-Bromotoluene                         | 15.42 | 15.43 | -0.01 |
| 4-Bromotridecane                       | 27.51 | 27.80 | -0.29 |
| 4-Butylacetophenone                    | 22.09 | 21.77 | 0.32  |
| 4-Butylmorpholine                      | 16.67 | 16.87 | -0.20 |
| 4-Butylphenol                          | 18.44 | 18.63 | -0.19 |
| 4-Chloro-1-(4-fluorophenyl)-1-butanone | 19.99 | 19.90 | 0.09  |

|                                    |       |       |       |
|------------------------------------|-------|-------|-------|
| 4-Chloro-1,2-butadiene             | 10.04 | 10.08 | -0.04 |
| 4-Chloro-1-butanol                 | 10.66 | 10.65 | 0.01  |
| 4-Chloro-1-butene                  | 9.93  | 9.97  | -0.04 |
| 4-Chloro-1-phenyl-1-butanone       | 20.16 | 19.93 | 0.23  |
| 4-Chloro-1-trifluoromethoxybenzene | 14.89 | 14.84 | 0.05  |
| 4-Chloro-2-pentene                 | 11.97 | 11.83 | 0.14  |
| 4-Chloroacetophenone               | 16.50 | 16.27 | 0.23  |
| 4-Chloroaniline                    | 13.88 | 14.04 | -0.16 |
| 4-Chloroanisole                    | 14.74 | 15.01 | -0.27 |
| 4-Chlorobenzaldehyde               | 14.96 | 14.54 | 0.42  |
| 4-Chlorobenzenemethanethiol        | 17.64 | 17.37 | 0.27  |
| 4-Chlorobutanal                    | 10.20 | 10.30 | -0.10 |
| 4-Chlorobutanoic acid              | 10.96 | 10.73 | 0.23  |
| 4-Chlorobutanoyl chloride          | 12.21 | 12.26 | -0.05 |
| 4-Chlorobutyronitrile              | 9.92  | 10.01 | -0.09 |
| 4-Chlorodiphenyl ether             | 23.05 | 22.93 | 0.12  |
| 4-Chloroethylbenzene               | 16.14 | 16.17 | -0.03 |
| 4-Chloroheptane                    | 15.63 | 15.58 | 0.05  |
| 4-Chloronitrobenzene               | 15.04 | 15.07 | -0.03 |
| 4-Chloro-N-methylaniline           | 16.06 | 15.98 | 0.08  |
| 4-Chloropentanoic acid             | 12.53 | 12.55 | -0.02 |
| 4-Chlorophenol                     | 12.99 | 13.12 | -0.13 |
| 4-Chlorophenoxytriethylsilane      | 27.61 | 27.50 | 0.11  |
| 4-Chlorostyrene                    | 16.49 | 16.04 | 0.45  |
| 4-Chlorothiophenol                 | 15.29 | 15.59 | -0.30 |
| 4-Chlorotoluene                    | 14.14 | 14.33 | -0.19 |
| 4-Cumylphenol                      | 16.65 | 16.78 | -0.13 |
| 4-Decanol                          | 19.70 | 19.76 | -0.06 |
| 4-Decanone                         | 19.18 | 19.31 | -0.13 |
| 4-Diethylamino-2-butanol           | 17.44 | 17.61 | -0.17 |
| 4-Ethoxyacetanilide                | 20.53 | 20.43 | 0.10  |
| 4-Ethoxyaniline                    | 16.33 | 16.56 | -0.23 |
| 4-Ethoxytoluene                    | 16.86 | 16.85 | 0.01  |
| 4-Ethyl-2-methylhexane             | 17.37 | 17.33 | 0.04  |
| 4-Ethyl-2-propylthiophane          | 19.77 | 19.64 | 0.13  |
| 4-Ethyl-2-propylthiophane sulfone  | 19.88 | 19.97 | -0.09 |
| 4-Ethyl-3-oxa-1-heptanol           | 16.64 | 16.76 | -0.12 |
| 4-Ethyl-3-oxa-5-oxo-1-octanol      | 18.64 | 18.71 | -0.07 |
| 4-Ethyl-4-heptanol                 | 17.81 | 17.91 | -0.10 |
| 4-Ethylaniline                     | 15.94 | 15.87 | 0.07  |
| 4-Ethylheptane                     | 17.38 | 17.35 | 0.03  |
| 4-Ethyl-m-xylene                   | 17.97 | 18.07 | -0.10 |

|                                       |       |       |       |
|---------------------------------------|-------|-------|-------|
| 4-Ethylnitrobenzene                   | 16.94 | 16.90 | 0.04  |
| 4-Ethyl-octane                        | 19.24 | 19.19 | 0.05  |
| 4-Ethyl-o-xylene                      | 18.07 | 18.07 | 0.00  |
| 4-Ethylphenyldiallylphosphine         | 29.26 | 29.06 | 0.20  |
| 4-Ethylphenyldipropylphosphine        | 29.55 | 29.30 | 0.25  |
| 4-Ethylpyridine                       | 13.29 | 13.34 | -0.05 |
| 4-Ethylstyrene                        | 18.22 | 17.87 | 0.35  |
| 4-Ethyltoluene                        | 16.15 | 16.16 | -0.01 |
| 4-Fluoro-1-trichloromethoxybenzene    | 18.77 | 18.82 | -0.05 |
| 4-Fluoro-1-trifluoromethoxybenzene    | 12.88 | 12.89 | -0.01 |
| 4-Fluoro-2-methylaniline              | 13.74 | 13.99 | -0.25 |
| 4-Fluoroacetophenone                  | 14.35 | 14.32 | 0.03  |
| 4-Fluoroanisole                       | 12.95 | 13.06 | -0.11 |
| 4-Fluorobenzeneacetonitrile           | 13.84 | 14.13 | -0.29 |
| 4-Fluorobenzonitrile                  | 12.59 | 12.30 | 0.29  |
| 4-Fluorobenzoyl chloride              | 14.46 | 14.54 | -0.08 |
| 4-Fluoriodobenzene                    | 15.28 | 15.46 | -0.18 |
| 4-Fluoronitrobenzene                  | 13.02 | 13.12 | -0.10 |
| 4-Fluorophenetole                     | 14.80 | 14.90 | -0.10 |
| 4-Fluorophenyltrimethylsilane         | 19.95 | 19.86 | 0.09  |
| 4-Fluorotoluene                       | 12.21 | 12.38 | -0.17 |
| 4-Formylmorpholine                    | 11.34 | 11.39 | -0.05 |
| 4-Heptanamine                         | 14.98 | 15.03 | -0.05 |
| 4-Heptanol                            | 14.26 | 14.26 | 0.00  |
| 4-Heptanone                           | 13.63 | 13.80 | -0.17 |
| 4-Heptanone ketazine                  | 29.07 | 28.97 | 0.10  |
| 4-Heptanone O-ethyloxime              | 19.28 | 19.27 | 0.01  |
| 4-Heptanone O-propyloxime             | 21.13 | 21.11 | 0.02  |
| 4-Heptanone oxime                     | 15.38 | 15.40 | -0.02 |
| 4-Heptyl bromide                      | 16.79 | 16.78 | 0.01  |
| 4-Hexen-2-ol                          | 12.43 | 12.34 | 0.09  |
| 4-Hexen-3-one                         | 11.95 | 11.89 | 0.06  |
| 4-Hexylacetophenone                   | 25.71 | 25.44 | 0.27  |
| 4H-Pyran-4-one                        | 9.79  | 9.48  | 0.31  |
| 4-Hydroxy-2-butanone                  | 9.32  | 8.86  | 0.46  |
| 4-Hydroxy-4-methyl-2-pentanone        | 12.45 | 12.51 | -0.06 |
| 4-Iodo-1,2-butadiene                  | 13.68 | 13.28 | 0.40  |
| 4-Iodotoluene                         | 17.10 | 17.40 | -0.30 |
| 4-Isopropyl-2-propylthiophane         | 21.52 | 21.46 | 0.06  |
| 4-Isopropyl-2-propylthiophane sulfone | 21.65 | 21.79 | -0.14 |
| 4-Isopropylbenzaldehyde               | 18.61 | 18.19 | 0.42  |
| 4-Isopropylcyclohexanone              | 16.58 | 16.59 | -0.01 |

|                                            |       |       |       |
|--------------------------------------------|-------|-------|-------|
| 4-Isopropylheptane                         | 19.22 | 19.17 | 0.05  |
| 4-Isopropylphenyldiallylphosphine          | 31.03 | 30.88 | 0.15  |
| 4-Isopropylpyridine                        | 14.96 | 15.16 | -0.20 |
| 4-Isopropylstyrene                         | 20.03 | 19.69 | 0.34  |
| 4-Methoxy-2-methylaniline                  | 16.63 | 16.62 | 0.01  |
| 4-Methoxy-4-methyl-2-pentanone             | 14.48 | 14.44 | 0.04  |
| 4-Methoxy- $\alpha$ -methylbenzenemethanol | 17.29 | 17.40 | -0.11 |
| 4-Methoxyaniline                           | 14.65 | 14.71 | -0.06 |
| 4-Methoxybenzeneacetaldehyde               | 16.93 | 17.05 | -0.12 |
| 4-Methoxybenzeneacetonitrile               | 16.64 | 16.76 | -0.12 |
| 4-Methoxybenzenemethanamine                | 16.40 | 16.36 | 0.04  |
| 4-Methoxybenzenethiol                      | 17.99 | 18.04 | -0.05 |
| 4-Methoxyphenyldiallylphosphine            | 28.13 | 27.90 | 0.23  |
| 4-Methoxyphenyldibutylphosphine            | 32.05 | 31.82 | 0.23  |
| 4-Methoxyphenyldipentylphosphine           | 35.89 | 35.49 | 0.40  |
| 4-Methoxytoluene                           | 14.98 | 15.00 | -0.02 |
| 4-Methyl-1,3-dioxane                       | 10.41 | 10.43 | -0.02 |
| 4-Methyl-1,3-dioxolane                     | 8.51  | 8.60  | -0.09 |
| 4-Methyl-1-heptanol                        | 16.38 | 16.07 | 0.31  |
| 4-Methyl-1-hexene                          | 13.59 | 13.56 | 0.03  |
| 4-Methyl-1H-imidazole                      | 9.25  | 9.22  | 0.03  |
| 4-Methyl-1-pentene                         | 11.71 | 11.72 | -0.01 |
| 4-Methyl-1-pentyne                         | 11.12 | 11.04 | 0.08  |
| 4-Methyl-2-(1-hexen-5-yl)phenol            | 23.97 | 24.08 | -0.11 |
| 4-Methyl-2,6-di(3-hexen-2-yl)phenol        | 35.03 | 35.10 | -0.07 |
| 4-Methyl-2,6-dicrotylphenol                | 27.58 | 27.79 | -0.21 |
| 4-Methyl-2-crotylphenol                    | 20.12 | 20.45 | -0.33 |
| 4-Methyl-2-heptanol                        | 16.41 | 16.08 | 0.33  |
| 4-Methyl-2-hexanamine                      | 14.94 | 15.01 | -0.07 |
| 4-Methyl-2-nitrophenol                     | 16.17 | 15.76 | 0.41  |
| 4-Methyl-2-pentanol                        | 12.43 | 12.41 | 0.02  |
| 4-Methyl-2-pentenoic acid                  | 12.73 | 12.40 | 0.33  |
| 4-Methyl-2-pentyne                         | 11.24 | 11.25 | -0.01 |
| 4-Methyl-3-heptanol                        | 16.13 | 16.08 | 0.05  |
| 4-Methyl-3-penten-2-ol                     | 12.40 | 12.37 | 0.03  |
| 4-Methyl-4-heptanol                        | 16.03 | 16.07 | -0.04 |
| 4-Methylacetophenone                       | 16.43 | 16.27 | 0.16  |
| 4-Methylbenzaldehyde                       | 14.78 | 14.53 | 0.25  |
| 4-Methylbenzeneacetaldehyde                | 16.23 | 16.37 | -0.14 |
| 4-Methylbenzeneacetonitrile                | 15.91 | 16.08 | -0.17 |
| 4-Methylbenzenemethanamine                 | 15.69 | 15.69 | 0.00  |
| 4-Methylbenzenepropanal                    | 18.02 | 18.20 | -0.18 |



|                                                      |       |       |       |
|------------------------------------------------------|-------|-------|-------|
| 4-Methylbenzoyl chloride                             | 16.82 | 16.49 | 0.33  |
| 4-Methyl-cis-2-pentene                               | 11.55 | 11.77 | -0.22 |
| 4-Methylcyclohexanemethanol                          | 15.39 | 15.21 | 0.18  |
| 4-Methylcyclohexanone                                | 12.95 | 12.94 | 0.01  |
| 4-Methylcyclohexene                                  | 12.61 | 12.75 | -0.14 |
| 4-Methylcyclohexyl acrylate                          | 18.97 | 18.91 | 0.06  |
| 4-Methylcyclopentene                                 | 10.81 | 10.92 | -0.11 |
| 4-Methyldecane                                       | 21.01 | 21.02 | -0.01 |
| 4-Methyldocosane                                     | 43.08 | 43.05 | 0.03  |
| 4-Methyldodecane                                     | 24.68 | 24.69 | -0.01 |
| 4-Methyleicosane                                     | 39.41 | 39.37 | 0.04  |
| 4-Methylene-1-isopropylcyclohexene                   | 18.16 | 18.19 | -0.03 |
| 4-Methylene-2-oxetanone                              | 8.04  | 7.79  | 0.25  |
| 4-Methylheneicosane                                  | 41.22 | 41.21 | 0.01  |
| 4-Methylheptadecane                                  | 33.91 | 33.87 | 0.04  |
| 4-Methylheptane                                      | 15.51 | 15.52 | -0.01 |
| 4-Methylhexadecane                                   | 32.06 | 32.03 | 0.03  |
| 4-Methylnonadecane                                   | 37.57 | 37.54 | 0.03  |
| 4-Methylnonane                                       | 19.18 | 19.19 | -0.01 |
| 4-Methyloctadecane                                   | 35.71 | 35.70 | 0.01  |
| 4-Methyloctane                                       | 17.36 | 17.35 | 0.01  |
| 4-Methyloxazole                                      | 8.41  | 8.37  | 0.04  |
| 4-Methylpent-3-en-2-one                              | 11.94 | 11.92 | 0.02  |
| 4-Methylpentadecane                                  | 30.21 | 30.20 | 0.01  |
| 4-Methylpentyl 4-methylpentoxy dithiophosphinic acid | 33.08 | 33.17 | -0.09 |
| 4-Methylpentyl dichloro phosphorus oxide             | 18.92 | 19.07 | -0.15 |
| 4-Methylpentyl dichloro phosphorus thioxide          | 22.42 | 22.37 | 0.05  |
| 4-Methylpentyl isopropoxy dithiophosphinic acid      | 27.75 | 27.68 | 0.07  |
| 4-Methylpentyl octyloxy dithiophosphinic acid        | 36.56 | 36.86 | -0.30 |
| 4-Methylphenethyl alcohol                            | 16.54 | 16.72 | -0.18 |
| 4-Methylpiperidine                                   | 12.08 | 12.33 | -0.25 |
| 4-Methylpyridine                                     | 11.44 | 11.51 | -0.07 |
| 4-Methylpyrimidine                                   | 10.66 | 10.41 | 0.25  |
| 4-Methylquinoline                                    | 18.41 | 18.47 | -0.06 |
| 4-Methylstyrene                                      | 16.07 | 16.04 | 0.03  |
| 4-Methyltetradecane                                  | 28.33 | 28.36 | -0.03 |
| 4-Methyl-trans-2-pentene                             | 11.80 | 11.77 | 0.03  |
| 4-Methyltridecane                                    | 26.46 | 26.53 | -0.07 |
| 4-Methylundecane                                     | 22.89 | 22.86 | 0.03  |
| 4-Methylvaleronitrile                                | 11.78 | 11.76 | 0.02  |
| 4-Morpholinamine                                     | 10.81 | 10.89 | -0.08 |

|                                 |       |       |       |
|---------------------------------|-------|-------|-------|
| 4-Morpholineethanamine          | 14.59 | 14.56 | 0.03  |
| 4-Morpholineethanol             | 13.70 | 13.76 | -0.06 |
| 4-Morpholinepropanamine         | 16.37 | 16.39 | -0.02 |
| 4-Nitroanisole                  | 15.70 | 15.74 | -0.04 |
| 4-Nitromethyltoluene            | 16.42 | 16.60 | -0.18 |
| 4-Nonanol                       | 17.85 | 17.93 | -0.08 |
| 4-Nonanone                      | 17.38 | 17.47 | -0.09 |
| 4-Nonylphenol                   | 27.64 | 27.80 | -0.16 |
| 4-Octanol                       | 16.12 | 16.09 | 0.03  |
| 4-Octanone                      | 15.70 | 15.64 | 0.06  |
| 4-Octylacetophenone             | 29.47 | 29.12 | 0.35  |
| 4-Octyne                        | 14.87 | 14.94 | -0.07 |
| 4-Oxa-6-oxo-2-nonanol           | 16.77 | 16.87 | -0.10 |
| 4-Oxo-1-heptanol                | 14.19 | 14.36 | -0.17 |
| 4-Oxopentanal                   | 10.03 | 10.34 | -0.31 |
| 4-Oxopentanoic acid             | 10.69 | 10.77 | -0.08 |
| 4-Penten-1-ol                   | 10.45 | 10.46 | -0.01 |
| 4-Penten-2-ol                   | 10.38 | 10.46 | -0.08 |
| 4-Pentenal                      | 9.89  | 10.11 | -0.22 |
| 4-Pentenitrile                  | 9.90  | 9.82  | 0.08  |
| 4-Pentenoic acid                | 10.41 | 10.54 | -0.13 |
| 4-Pentylphenol                  | 20.86 | 20.46 | 0.40  |
| 4-Pentyn-1-ol                   | 9.65  | 9.78  | -0.13 |
| 4-Phenoxyphenyldiallylphosphine | 35.49 | 35.82 | -0.33 |
| 4-Phenyl-1,3-dioxane            | 18.23 | 18.33 | -0.10 |
| 4-Phenyl-2-butanone             | 17.87 | 18.03 | -0.16 |
| 4-Piperidineethanol             | 14.74 | 14.73 | 0.01  |
| 4-Propyldecane                  | 24.74 | 24.69 | 0.05  |
| 4-Propyldocosane                | 46.71 | 46.72 | -0.01 |
| 4-Propyldodecane                | 28.37 | 28.36 | 0.01  |
| 4-Propylheneicosane             | 44.92 | 44.88 | 0.04  |
| 4-Propylheptane                 | 19.23 | 19.19 | 0.04  |
| 4-Propylnonane                  | 22.85 | 22.86 | -0.01 |
| 4-Propyloctane                  | 21.02 | 21.02 | 0.00  |
| 4-Propylphenol                  | 16.73 | 16.79 | -0.06 |
| 4-Propylpyridine                | 14.97 | 15.18 | -0.21 |
| 4-Propyltoluene                 | 18.07 | 18.00 | 0.07  |
| 4-Propyltridecane               | 30.21 | 30.20 | 0.01  |
| 4-Propylundecane                | 26.55 | 26.53 | 0.02  |
| 4-Pyridineethanamine            | 14.71 | 14.70 | 0.01  |
| 4-Pyridinemethanamine           | 12.73 | 12.87 | -0.14 |
| 4-s-Butylaniline                | 19.44 | 19.52 | -0.08 |

|                                        |       |       |       |
|----------------------------------------|-------|-------|-------|
| 4-s-Butylphenol                        | 18.31 | 18.61 | -0.30 |
| 4-t-Butyl-2-methylphenol               | 20.61 | 20.53 | 0.08  |
| 4-t-Butylacetophenone                  | 21.97 | 21.77 | 0.20  |
| 4-t-Butylaniline                       | 19.43 | 19.53 | -0.10 |
| 4-t-Butylbenzaldehyde                  | 20.38 | 20.03 | 0.35  |
| 4-t-Butylphenol                        | 18.59 | 18.62 | -0.03 |
| 4-t-Butylpyridine                      | 17.10 | 17.01 | 0.09  |
| 4-tert-Butyltoluene                    | 19.79 | 19.82 | -0.03 |
| 4-Tetradecanol                         | 27.19 | 27.11 | 0.08  |
| 4-Tolyl dibutoxyborine                 | 30.39 | 30.30 | 0.09  |
| 4-Tolyl diethoxyborine                 | 23.01 | 22.96 | 0.05  |
| 4-Tolyl dimethoxyborine                | 19.22 | 19.26 | -0.04 |
| 4-Tolyl dipropoxyborine                | 26.73 | 26.63 | 0.10  |
| 4-Tolylacetate                         | 17.11 | 16.87 | 0.24  |
| 4-Tolyldiallylphosphine                | 26.91 | 27.22 | -0.31 |
| 4-Tolyliodoacetylene                   | 20.19 | 20.41 | -0.22 |
| 4-Tolylphosphorous diaziridide         | 25.36 | 25.25 | 0.11  |
| 4-Tridecanol                           | 25.32 | 25.27 | 0.05  |
| 4-Trifluoromethylaniline               | 14.18 | 14.14 | 0.04  |
| 4-Trifluoromethylphenyltrimethylsilane | 21.66 | 21.92 | -0.26 |
| 4-Trimethylsiloxyphenyltrimethylsilane | 29.58 | 29.55 | 0.03  |
| 4-Vinylcyclohexene                     | 14.25 | 14.46 | -0.21 |
| 4-Vinylpyridine                        | 13.33 | 13.22 | 0.11  |
| 5-(Chloromethyl)-1,3-benzodioxole      | 16.82 | 16.74 | 0.08  |
| 5,5-Dimethyl-1-hexen-3-yne             | 14.77 | 14.81 | -0.04 |
| 5,5-Dimethyl-1-hexene                  | 15.46 | 15.40 | 0.06  |
| 5,6,7,8-Tetrahydro-1-naphthalenamine   | 18.54 | 18.76 | -0.22 |
| 5,6,7,8-Tetrahydroquinoline            | 16.17 | 16.30 | -0.13 |
| 5,6-Dibutyldecane                      | 33.75 | 33.85 | -0.10 |
| 5-Amino-1-pentanol                     | 11.84 | 11.94 | -0.10 |
| 5-Amino-2-butoxypyridine               | 19.85 | 19.54 | 0.31  |
| 5-Aminomethyl-1,3-benzodioxole         | 16.04 | 16.20 | -0.16 |
| 5-Bromo-1-pentene                      | 12.96 | 12.97 | -0.01 |
| 5-Bromo-3-bromomethyl-2-methyloetane   | 25.56 | 25.33 | 0.23  |
| 5-Bromo-3-bromomethyloctane            | 23.42 | 23.51 | -0.09 |
| 5-Bromoacenaphthene                    | 23.61 | 23.61 | 0.00  |
| 5-Bromononane                          | 20.58 | 20.45 | 0.13  |
| 5-Bromovaleronitrile                   | 13.00 | 13.01 | -0.01 |
| 5-Butyldocosane                        | 48.51 | 48.55 | -0.04 |
| 5-Butylnonane                          | 24.59 | 24.69 | -0.10 |
| 5-Chloro-2-pentanone                   | 11.91 | 12.03 | -0.12 |
| 5-Chloroacenaphthene                   | 22.23 | 22.51 | -0.28 |

|                                          |       |       |       |
|------------------------------------------|-------|-------|-------|
| 5-Chloropentanoyl chloride               | 14.01 | 14.09 | -0.08 |
| 5-Chlorovaleric acid                     | 12.53 | 12.56 | -0.03 |
| 5-Cyclohexyleicosane                     | 47.71 | 47.69 | 0.02  |
| 5-Decanol                                | 19.80 | 19.76 | 0.04  |
| 5-Decyn-1-ol                             | 18.99 | 19.17 | -0.18 |
| 5-Decyne                                 | 18.52 | 18.61 | -0.09 |
| 5-Ethyl-2-norbornene                     | 15.52 | 15.54 | -0.02 |
| 5-Ethylidene-2-norbornene                | 15.42 | 15.51 | -0.09 |
| 5-Ethyl-m-xylene                         | 18.12 | 18.07 | 0.05  |
| 5-Hexenoic acid                          | 12.27 | 12.37 | -0.10 |
| 5-Hexyn-2-one                            | 11.00 | 11.16 | -0.16 |
| 5-Hydroxy-2-pentanone                    | 10.58 | 10.69 | -0.11 |
| 5-Iodoacenaphthene                       | 25.38 | 25.58 | -0.20 |
| 5-Isopropyl-2-methylphenol               | 18.61 | 18.68 | -0.07 |
| 5-Methoxy-1-cyclohexyl-1-pentanol        | 23.20 | 23.23 | -0.03 |
| 5-Methoxy-1-phenyl-1-pentanol            | 22.71 | 22.82 | -0.11 |
| 5-Methoxy-2-pentanol                     | 13.16 | 13.08 | 0.08  |
| 5-Methoxy-2-pentanone                    | 12.47 | 12.63 | -0.16 |
| 5-Methyl-1-heptanol                      | 16.26 | 16.07 | 0.19  |
| 5-Methyl-1-hexanol                       | 14.16 | 14.24 | -0.08 |
| 5-Methyl-1-hexene                        | 13.62 | 13.56 | 0.06  |
| 5-Methyl-1-hexyne                        | 12.87 | 12.87 | 0.00  |
| 5-Methyl-2(3H)-furanone                  | 9.60  | 9.67  | -0.07 |
| 5-Methyl-2(5H)-furanone                  | 9.58  | 9.80  | -0.22 |
| 5-Methyl-2,3-hexanedione                 | 13.92 | 13.89 | 0.03  |
| 5-Methyl-2-ethylcoumaran                 | 19.77 | 19.75 | 0.02  |
| 5-Methyl-2-furanmethanol                 | 11.84 | 11.85 | -0.01 |
| 5-Methyl-2-hexanol                       | 14.26 | 14.24 | 0.02  |
| 5-Methyl-2-hexanone oxime                | 15.34 | 15.39 | -0.05 |
| 5-Methyl-2-hexyne                        | 13.01 | 13.09 | -0.08 |
| 5-Methyl-2-isopropylcyclohexanol acetate | 22.72 | 22.67 | 0.05  |
| 5-Methyl-3-heptanol                      | 15.92 | 16.08 | -0.16 |
| 5-Methyl-3-hexanol                       | 14.05 | 14.24 | -0.19 |
| 5-Methyl-3-hexen-2-one                   | 13.70 | 13.71 | -0.01 |
| 5-Methyl-5-hexen-2-one                   | 13.71 | 13.71 | 0.00  |
| 5-Methylbenzo[b]thiophene                | 18.46 | 18.25 | 0.21  |
| 5-Methyldecane                           | 21.03 | 21.02 | 0.01  |
| 5-Methyldocosane                         | 43.10 | 43.05 | 0.05  |
| 5-Methyldodecane                         | 24.64 | 24.69 | -0.05 |
| 5-Methyleicosane                         | 39.42 | 39.37 | 0.05  |
| 5-Methylheneicosane                      | 41.24 | 41.21 | 0.03  |
| 5-Methylheptadecane                      | 33.90 | 33.87 | 0.03  |

|                                                |       |       |       |
|------------------------------------------------|-------|-------|-------|
| 5-Methylhexadecane                             | 32.08 | 32.03 | 0.05  |
| 5-Methylisoxazole                              | 8.46  | 8.54  | -0.08 |
| 5-Methylnonadecane                             | 37.57 | 37.54 | 0.03  |
| 5-Methylnonane                                 | 19.14 | 19.19 | -0.05 |
| 5-Methyloctadecane                             | 35.73 | 35.70 | 0.03  |
| 5-Methylpentadecane                            | 30.21 | 30.20 | 0.01  |
| 5-Methylquinoline                              | 18.45 | 18.47 | -0.02 |
| 5-Methyltetradecane                            | 28.33 | 28.36 | -0.03 |
| 5-Methyltetralin                               | 18.83 | 19.05 | -0.22 |
| 5-Methyltricosane                              | 44.94 | 44.88 | 0.06  |
| 5-Methyltridecane                              | 26.54 | 26.53 | 0.01  |
| 5-Methylundecane                               | 22.83 | 22.86 | -0.03 |
| 5-Methyluracil                                 | 11.23 | 11.56 | -0.33 |
| 5-Nonanol                                      | 17.93 | 17.93 | 0.00  |
| 5-Nonanone                                     | 17.35 | 17.47 | -0.12 |
| 5-Oxohexanoic acid                             | 12.60 | 12.60 | 0.00  |
| 5-Phenyl-1-pentanol                            | 20.21 | 20.32 | -0.11 |
| 5-Phenyl-4-nonene                              | 26.61 | 27.05 | -0.44 |
| 5-Phenyleicosane                               | 47.55 | 47.27 | 0.28  |
| 5-Phenylnonane                                 | 27.12 | 27.09 | 0.03  |
| 5-Propyl-4-tridecanol                          | 30.60 | 30.76 | -0.16 |
| 6,6-Dimethylbicyclo(3.1.1)heptan-2-one         | 15.83 | 15.74 | 0.09  |
| 6,6-Dimethylbicyclo[3.1.1]hept-2-ene-2-ethanol | 19.69 | 19.81 | -0.12 |
| 6,7-Diamyldodecane                             | 41.25 | 41.19 | 0.06  |
| 6-Bromo-2-hexanone                             | 14.91 | 15.04 | -0.13 |
| 6-Bromoundecane                                | 24.32 | 24.12 | 0.20  |
| 6-Chloro-1-hexanol                             | 14.35 | 14.32 | 0.03  |
| 6-Dodecyne                                     | 22.32 | 22.28 | 0.04  |
| 6-Heptenoic acid                               | 14.08 | 14.21 | -0.13 |
| 6-Methyl-1-heptanol                            | 16.15 | 16.07 | 0.08  |
| 6-Methyl-1-heptene                             | 15.47 | 15.39 | 0.08  |
| 6-Methyl-2-heptanol                            | 16.02 | 16.08 | -0.06 |
| 6-Methyl-2-heptanol acetate                    | 20.09 | 19.88 | 0.21  |
| 6-Methyl-2-heptanone                           | 15.65 | 15.62 | 0.03  |
| 6-Methyl-3-heptanol                            | 16.07 | 16.08 | -0.01 |
| 6-Methyl-4-octanone                            | 17.37 | 17.46 | -0.09 |
| 6-Methyldodecane                               | 24.73 | 24.69 | 0.04  |
| 6-Methylpentadecane                            | 30.15 | 30.20 | -0.05 |
| 6-Methylquinoline                              | 18.61 | 18.47 | 0.14  |
| 6-Methyltetradecane                            | 28.37 | 28.36 | 0.01  |
| 6-Methyltridecane                              | 26.52 | 26.53 | -0.01 |
| 6-Methylundecane                               | 22.88 | 22.86 | 0.02  |

|                                                                |       |       |       |
|----------------------------------------------------------------|-------|-------|-------|
| 6-Oxabicyclo[3.1.0]hexane                                      | 9.00  | 9.01  | -0.01 |
| 6-Undecanol                                                    | 21.36 | 21.60 | -0.24 |
| 6-Undecanone                                                   | 20.86 | 21.14 | -0.28 |
| 6-Vinyl-6-methyl-1-isopropyl-3-(1-methylethylidene)cyclohexene | 27.72 | 27.31 | 0.41  |
| 7-(3-Phenylpropyl)-7-tridecanol                                | 40.73 | 40.49 | 0.24  |
| 7,8-Dimethyltetradecane                                        | 30.04 | 30.18 | -0.14 |
| 7-Bromo-1,5,5-trichloroheptane                                 | 22.42 | 22.48 | -0.06 |
| 7-Butyl-7-tridecanol                                           | 32.65 | 32.59 | 0.06  |
| 7-Butyltridecane                                               | 31.95 | 32.03 | -0.08 |
| 7-Chloro-1-heptanol                                            | 16.17 | 16.16 | 0.01  |
| 7-Chloroheptanonitrile                                         | 15.50 | 15.52 | -0.02 |
| 7-Hexyl-7-pentadecanol                                         | 39.69 | 39.93 | -0.24 |
| 7-Hexylpentadecane                                             | 39.26 | 39.37 | -0.11 |
| 7-Methylpentadecane                                            | 30.19 | 30.20 | -0.01 |
| 7-Methylquinoline                                              | 18.67 | 18.47 | 0.20  |
| 7-Methyltetradecane                                            | 28.35 | 28.36 | -0.01 |
| 7-Methyltridecane                                              | 26.55 | 26.53 | 0.02  |
| 7-Oxabicyclo[4.1.0]heptane                                     | 10.86 | 10.84 | 0.02  |
| 7-Phenyl-6-tridecene                                           | 34.23 | 34.39 | -0.16 |
| 7-Phenyltridecane                                              | 34.40 | 34.43 | -0.03 |
| 8-Chloroquinoline                                              | 18.22 | 18.48 | -0.26 |
| 8-Heptyl-7-pentadecene                                         | 41.27 | 41.17 | 0.10  |
| 8-Heptylpentadecane                                            | 41.29 | 41.21 | 0.08  |
| 8-Methylpentadecane                                            | 30.19 | 30.20 | -0.01 |
| 8-Methylquinoline                                              | 18.51 | 18.47 | 0.04  |
| 8-Propyl-8-pentadecanol                                        | 34.51 | 34.42 | 0.09  |
| 8-Propylpentadecane                                            | 33.90 | 33.87 | 0.03  |
| 9,10,11,12-Tetrapropyleicosane                                 | 59.23 | 59.52 | -0.29 |
| 9,10-Benzophenanthrene                                         | 32.24 | 31.87 | 0.37  |
| 9,10-Dimethyloctadecane                                        | 37.09 | 37.52 | -0.43 |
| 9,10-Dipropyloctadecane                                        | 44.76 | 44.86 | -0.10 |
| 9-Bromo-1,5,5-trichlorononane                                  | 26.20 | 26.15 | 0.05  |
| 9-Decen-1-ol                                                   | 19.63 | 19.64 | -0.01 |
| 9-Decyn-1-ol                                                   | 18.99 | 18.95 | 0.04  |
| 9-Heptylheptadecane                                            | 44.74 | 44.88 | -0.14 |
| 9-methyl-8-heptadecene                                         | 33.79 | 33.83 | -0.04 |
| Acenaphthene                                                   | 20.55 | 20.60 | -0.05 |
| Acetaldehyde                                                   | 4.57  | 4.73  | -0.16 |
| Acetaldoxime                                                   | 6.22  | 6.31  | -0.09 |
| Acetamide                                                      | 6.03  | 5.77  | 0.26  |
| Acetic acid                                                    | 5.17  | 5.15  | 0.02  |

|                                        |       |       |       |
|----------------------------------------|-------|-------|-------|
| Acetic acid 1,3-dichloroisopropylester | 14.34 | 14.53 | -0.19 |
| Acetic acid 1-chloroethylester         | 10.82 | 10.83 | -0.01 |
| Acetic acid 2-bromoethylester          | 11.91 | 11.95 | -0.04 |
| Acetic acid 2-chloroethylester         | 10.51 | 10.79 | -0.28 |
| Acetic acid 2-phenoxyethylester        | 19.21 | 19.31 | -0.10 |
| Acetic acid 3-chloropropylester        | 12.88 | 12.62 | 0.26  |
| Acetic anhydride                       | 8.87  | 8.90  | -0.03 |
| Acetoacetic acid butylester            | 16.19 | 16.33 | -0.14 |
| Acetoin                                | 8.74  | 8.86  | -0.12 |
| Acetol                                 | 7.01  | 7.02  | -0.01 |
| Acetone dibutoxyketal                  | 22.29 | 22.27 | 0.02  |
| Acetone glycerol                       | 12.93 | 12.81 | 0.12  |
| Acetone oxime                          | 7.97  | 8.06  | -0.09 |
| Acetonitrile                           | 4.39  | 4.44  | -0.05 |
| Acetonylacetone                        | 11.84 | 12.07 | -0.23 |
| Acetophenone                           | 14.47 | 14.36 | 0.11  |
| Acetoxime O-ethyl ether                | 10.28 | 10.18 | 0.10  |
| Acetoxime O-methyl ether               | 8.41  | 8.33  | 0.08  |
| Acetoxime O-propyl ether               | 12.06 | 12.01 | 0.05  |
| Acetoxyacetic acid ethylester          | 13.23 | 13.25 | -0.02 |
| Acetoxyacetone                         | 10.69 | 10.83 | -0.14 |
| Acetylacetone (enol form)              | 10.96 | 10.55 | 0.41  |
| Acetylbromide                          | 7.86  | 7.85  | 0.01  |
| Acetylchloride                         | 6.65  | 6.68  | -0.03 |
| Acetylcyanide                          | 6.45  | 6.38  | 0.07  |
| Acetylhexane                           | 14.83 | 14.77 | 0.06  |
| Acetylmesitylene                       | 19.96 | 20.08 | -0.12 |
| Acrylic acid                           | 6.91  | 6.87  | 0.04  |
| Acrylic acid chloride                  | 8.40  | 8.40  | 0.00  |
| Adamantane                             | 16.51 | 16.59 | -0.08 |
| Adiponitrile                           | 11.63 | 11.69 | -0.06 |
| Allicin                                | 18.73 | 18.65 | 0.08  |
| Allyl 2-furancarboxylate               | 15.76 | 15.49 | 0.27  |
| Allyl acetate                          | 10.48 | 10.60 | -0.12 |
| Allyl alcohol                          | 6.73  | 6.79  | -0.06 |
| Allyl benzoate                         | 18.43 | 18.50 | -0.07 |
| Allyl bromide                          | 9.57  | 9.30  | 0.27  |
| Allyl butyrate                         | 14.14 | 14.27 | -0.13 |
| Allyl chloride                         | 8.11  | 8.13  | -0.02 |
| Allyl chloroformate                    | 10.69 | 10.75 | -0.06 |
| Allyl cyanide                          | 7.83  | 7.98  | -0.15 |
| Allyl ether                            | 11.83 | 12.28 | -0.45 |

|                                                 |       |       |       |
|-------------------------------------------------|-------|-------|-------|
| Allyl ethyl ether                               | 10.53 | 10.57 | -0.04 |
| Allyl glycidyl ether                            | 12.13 | 12.23 | -0.10 |
| Allyl iodide                                    | 11.55 | 11.34 | 0.21  |
| Allyl methacrylate                              | 14.01 | 14.17 | -0.16 |
| Allyl methyl ether                              | 8.55  | 8.72  | -0.17 |
| Allyl phenyl ether                              | 16.54 | 16.66 | -0.12 |
| Allyl propanoate                                | 12.28 | 12.43 | -0.15 |
| Allyl sulfide                                   | 14.67 | 14.75 | -0.08 |
| Allyl trans-cinnamate                           | 21.99 | 22.09 | -0.10 |
| Allyl vinyl ether                               | 10.37 | 10.29 | 0.08  |
| Allylacetoacetate                               | 14.32 | 14.37 | -0.05 |
| Allylacrylate                                   | 12.21 | 12.31 | -0.10 |
| Allylamine                                      | 7.56  | 7.59  | -0.03 |
| Allylchlorodimethylsilane                       | 15.06 | 15.34 | -0.28 |
| Allylcyclopentane                               | 14.55 | 14.54 | 0.01  |
| Allyldiethylamine                               | 15.22 | 15.09 | 0.13  |
| Allyldimethylamine                              | 11.56 | 11.45 | 0.11  |
| Allylmethyldichlorosilane                       | 15.12 | 15.26 | -0.14 |
| Allyltrichlorosilane                            | 15.45 | 15.19 | 0.26  |
| Allyltriethoxysilane                            | 22.09 | 22.00 | 0.09  |
| Allyltrimethylsilane                            | 15.52 | 15.55 | -0.03 |
| alpha-(Chloromethyl)benzenemethanol             | 16.64 | 16.72 | -0.08 |
| alpha,alpha-Dichloroacetoacetic acid ethylester | 16.37 | 16.48 | -0.11 |
| alpha,alpha-Dichloroacetophenone                | 18.31 | 18.19 | 0.12  |
| alpha,alpha-Dimethylacetoacetic acid ethylester | 16.17 | 16.32 | -0.15 |
| alpha-Allylbenzenemethanol                      | 18.04 | 18.37 | -0.33 |
| alpha-Bromoacetoacetic acid ethylester          | 15.97 | 15.75 | 0.22  |
| alpha-Chloroacetoacetic acid ethylester         | 14.48 | 14.55 | -0.07 |
| alpha-Chlorobenzeneacetyl chloride              | 18.16 | 18.31 | -0.15 |
| alpha-Chlorohydrin                              | 9.41  | 9.38  | 0.03  |
| alpha-Chlorostyrene                             | 16.17 | 16.08 | 0.09  |
| alpha-Curcumene                                 | 26.74 | 27.11 | -0.37 |
| alpha-D-Glucose                                 | 14.28 | 14.43 | -0.15 |
| alpha-Ethylstyrene                              | 18.21 | 17.83 | 0.38  |
| alpha-Humulene                                  | 26.93 | 27.34 | -0.41 |
| alpha-Ionol                                     | 24.32 | 24.27 | 0.05  |
| alpha-Ionone                                    | 24.28 | 23.81 | 0.47  |
| alpha-Irone                                     | 25.80 | 25.63 | 0.17  |
| alpha-Linolenic acid                            | 34.21 | 34.28 | -0.07 |
| alpha-Methyl benzylamine                        | 15.64 | 15.59 | 0.05  |
| alpha-Methyl-2-furanmethanol                    | 11.81 | 11.81 | 0.00  |
| alpha-Methyl-4-isopropylbenzenepropanal         | 23.72 | 23.68 | 0.04  |



|                                         |       |       |       |
|-----------------------------------------|-------|-------|-------|
| alpha-Methyl-4-morpholineethanol        | 15.61 | 15.59 | 0.02  |
| alpha-Methylbenzeneacetaldehyde         | 15.96 | 16.28 | -0.32 |
| alpha-Methylbenzeneacetic acid          | 16.55 | 16.71 | -0.16 |
| alpha-Methylbenzenepropanol             | 18.20 | 18.49 | -0.29 |
| alpha-Methylcyclohexanemethanol         | 15.16 | 15.23 | -0.07 |
| alpha-Methylcyclopropanemethanol        | 10.05 | 9.72  | 0.33  |
| alpha-Methylstyrene                     | 16.11 | 15.99 | 0.12  |
| alpha-Naphthaleneazide                  | 21.01 | 21.11 | -0.10 |
| alpha-Pentylcinnamaldehyde              | 25.83 | 25.42 | 0.41  |
| alpha-Phellandrene                      | 17.95 | 18.19 | -0.24 |
| alpha-Phenylacetoacetic acid ethylester | 22.81 | 22.74 | 0.07  |
| alpha-Pinene                            | 17.43 | 17.41 | 0.02  |
| alpha-Santalol                          | 26.65 | 26.28 | 0.37  |
| alpha-Terpinene                         | 18.22 | 18.23 | -0.01 |
| alpha-Terpineol                         | 18.71 | 18.83 | -0.12 |
| alpha-Terpineol acetate                 | 22.43 | 22.63 | -0.20 |
| alpha-Vetivone                          | 26.94 | 26.69 | 0.25  |
| Amyl acetate                            | 14.36 | 14.39 | -0.03 |
| Amyl formate                            | 12.59 | 12.61 | -0.02 |
| Amyl propionate                         | 16.15 | 16.22 | -0.07 |
| Amyl thiocyanate                        | 14.96 | 14.98 | -0.02 |
| Amylamine                               | 11.41 | 11.38 | 0.03  |
| Amylbenzene                             | 19.71 | 19.76 | -0.05 |
| Amylobarbitone                          | 22.80 | 22.72 | 0.08  |
| Amylsilane                              | 14.13 | 14.14 | -0.01 |
| Amylsulfinyl chloride                   | 15.60 | 15.71 | -0.11 |
| Anabasine                               | 19.39 | 19.31 | 0.08  |
| Anatabine                               | 19.04 | 19.23 | -0.19 |
| Angelic acid                            | 10.71 | 10.61 | 0.10  |
| Aniline                                 | 12.21 | 12.13 | 0.08  |
| Anise alcohol                           | 15.54 | 15.56 | -0.02 |
| Anisole                                 | 13.06 | 13.10 | -0.04 |
| Anisyl methyl ketone                    | 18.66 | 18.78 | -0.12 |
| Anthracene                              | 24.97 | 24.75 | 0.22  |
| Apiole                                  | 23.89 | 23.56 | 0.33  |
| Arachic alcohol                         | 37.99 | 38.11 | -0.12 |
| Arachidic acid                          | 38.45 | 38.19 | 0.26  |
| Arecoline                               | 16.85 | 16.84 | 0.01  |
| Ascaridole                              | 18.65 | 19.00 | -0.35 |
| Aspon                                   | 37.44 | 37.73 | -0.29 |
| Azepane                                 | 12.53 | 12.35 | 0.18  |
| Azetidine                               | 6.91  | 6.84  | 0.07  |

|                            |       |       |       |
|----------------------------|-------|-------|-------|
| Azidobenzene               | 14.04 | 13.99 | 0.05  |
| Azocane                    | 14.02 | 14.18 | -0.16 |
| Azomethane                 | 7.84  | 7.94  | -0.10 |
| Benzal bromide             | 18.72 | 18.48 | 0.24  |
| Benzalaniline              | 23.68 | 23.40 | 0.28  |
| Benzalchloride             | 16.15 | 16.25 | -0.10 |
| Benzaldehyde               | 12.81 | 12.63 | 0.18  |
| Benzedrine                 | 17.45 | 17.42 | 0.03  |
| Benzene                    | 10.41 | 10.51 | -0.10 |
| Benzeneazoethane           | 17.81 | 17.54 | 0.27  |
| Benzenesulfonylchloride    | 16.26 | 16.17 | 0.09  |
| Benzenethiol               | 13.66 | 13.68 | -0.02 |
| Benzhydryl chloride        | 23.95 | 24.04 | -0.09 |
| Benzo[a]phenanthrene       | 32.24 | 31.87 | 0.37  |
| Benzo[b]furan              | 13.91 | 13.93 | -0.02 |
| Benzo[c]isoxazole          | 13.22 | 12.94 | 0.28  |
| Benzo[d]isoxazole          | 12.96 | 13.05 | -0.09 |
| Benzonitrile               | 12.49 | 12.34 | 0.15  |
| Benzophenone               | 22.47 | 22.26 | 0.21  |
| Benzophenoneimine          | 23.24 | 23.43 | -0.19 |
| Benzophenone-N-methylimine | 25.27 | 25.26 | 0.01  |
| Benzotrifluoride           | 12.19 | 12.53 | -0.34 |
| Benzoxazole                | 12.98 | 13.35 | -0.37 |
| Benzoyl bromide            | 15.70 | 15.75 | -0.05 |
| Benzoyl chloride           | 14.73 | 14.58 | 0.15  |
| Benzyl 3-methylbutanoate   | 22.01 | 22.27 | -0.26 |
| Benzyl acetate             | 16.66 | 16.78 | -0.12 |
| Benzyl acrylate            | 18.31 | 18.50 | -0.19 |
| Benzyl alcohol             | 12.90 | 12.98 | -0.08 |
| Benzyl benzoate            | 24.75 | 24.68 | 0.07  |
| Benzyl butanoate           | 20.27 | 20.45 | -0.18 |
| Benzyl chloroacetate       | 18.86 | 18.69 | 0.17  |
| Benzyl chloroformate       | 17.18 | 16.94 | 0.24  |
| Benzyl ethyl ether         | 16.63 | 16.76 | -0.13 |
| Benzyl formate             | 15.07 | 15.00 | 0.07  |
| Benzyl isobutyrate         | 20.05 | 20.44 | -0.39 |
| Benzyl isonitrile          | 14.51 | 14.37 | 0.14  |
| Benzyl laurate             | 34.76 | 35.14 | -0.38 |
| Benzyl mercaptan           | 15.38 | 15.46 | -0.08 |
| Benzyl methacrylate        | 20.07 | 20.36 | -0.29 |
| Benzyl methyl ether        | 14.81 | 14.91 | -0.10 |
| Benzyl nitrite             | 14.85 | 14.84 | 0.01  |

|                                         |       |       |       |
|-----------------------------------------|-------|-------|-------|
| Benzylamine                             | 13.58 | 13.78 | -0.20 |
| Benzylbromide                           | 15.59 | 15.49 | 0.10  |
| Benzylcarbinol isobutyrate              | 22.03 | 22.27 | -0.24 |
| Benzylethylamine                        | 17.21 | 17.43 | -0.22 |
| Benzylidene fluoride                    | 12.20 | 12.38 | -0.18 |
| Benzylisopropylamine                    | 19.59 | 19.23 | 0.36  |
| Benzylisothiocyanate                    | 18.11 | 18.22 | -0.11 |
| Benzylmethylamine                       | 15.53 | 15.61 | -0.08 |
| Benzylmethylsulfide                     | 17.29 | 17.31 | -0.02 |
| Benzylsalicylate                        | 25.54 | 25.39 | 0.15  |
| Benzyl-t-butanol                        | 20.15 | 20.30 | -0.15 |
| Benzyltrimethylsilane                   | 21.85 | 21.73 | 0.12  |
| beta-Chlorostyrene                      | 16.44 | 16.03 | 0.41  |
| beta-Citronellol                        | 19.71 | 19.69 | 0.02  |
| beta-Cyclocitral                        | 18.42 | 18.53 | -0.11 |
| beta-Elemene                            | 26.93 | 27.18 | -0.25 |
| beta-Farnesene                          | 28.00 | 28.06 | -0.06 |
| beta-Ionol                              | 24.38 | 24.31 | 0.07  |
| beta-Methylbenzeneethanamine            | 17.43 | 17.43 | 0.00  |
| beta-Methylbenzenepropanoic acid        | 18.36 | 18.54 | -0.18 |
| beta-Phellandrene                       | 17.97 | 18.15 | -0.18 |
| beta-Santalol                           | 26.86 | 27.05 | -0.19 |
| beta-Terpineol                          | 18.76 | 18.78 | -0.02 |
| beta-Vetivone                           | 26.77 | 26.69 | 0.08  |
| Bicyclo[2.2.1]hept-5-ene-2-carbaldehyde | 13.74 | 13.96 | -0.22 |
| Bicyclo[2.2.1]hept-5-ene-2-carbonitrile | 13.64 | 13.67 | -0.03 |
| Bicyclohexane                           | 21.10 | 21.14 | -0.04 |
| Bicyclopophosphate                      | 12.87 | 13.13 | -0.26 |
| Bicyclopophite                          | 13.32 | 13.56 | -0.24 |
| Bicyclothiophosphate                    | 15.74 | 16.11 | -0.37 |
| Bis(1-chloroethyl)ether                 | 12.93 | 12.76 | 0.17  |
| Bis(1-phenylethyl)amine                 | 28.91 | 28.94 | -0.03 |
| Bis(2-bromoethyl) ether                 | 14.98 | 15.00 | -0.02 |
| Bis(2-butoxyethyl)phosphite             | 28.71 | 28.66 | 0.05  |
| Bis(2-chloroethoxy-2-ethyl) fumarate    | 29.58 | 29.33 | 0.25  |
| Bis(2-chloroethoxy-2-ethyl) maleate     | 29.40 | 29.33 | 0.07  |
| Bis(2-chloroethyl) ether                | 12.51 | 12.66 | -0.15 |
| Bis(2-chloroethyl)carbonate             | 15.06 | 15.10 | -0.04 |
| Bis(2-cyanoethyl) ether                 | 12.36 | 12.36 | 0.00  |
| Bis(2-ethoxyethyl)phosphite             | 21.35 | 21.32 | 0.03  |
| Bis(2-ethylhexyl) adipate               | 42.60 | 42.58 | 0.02  |
| Bis(2-ethylhexyl) azelate               | 47.68 | 48.09 | -0.41 |

|                                                   |       |       |       |
|---------------------------------------------------|-------|-------|-------|
| Bis(2-ethylhexyl) phosphite                       | 34.56 | 34.63 | -0.07 |
| Bis(2-ethylhexyl) sebacate                        | 49.93 | 49.92 | 0.01  |
| Bis(2-furfuryl)amine                              | 19.23 | 19.32 | -0.09 |
| Bis(2-heptoxyethyl)phosphite                      | 39.80 | 39.67 | 0.13  |
| Bis(2-hexoxyethyl)phosphite                       | 36.12 | 36.00 | 0.12  |
| Bis(2-hydroxyethyl) sulfide                       | 12.51 | 12.45 | 0.06  |
| Bis(2-hydroxyethyl)ammonium hexanoate             | 23.19 | 23.13 | 0.06  |
| Bis(2-hydroxyethyl)methylamine                    | 12.60 | 12.67 | -0.07 |
| Bis(2-hydroxyethyl)phosphine                      | 13.50 | 13.34 | 0.16  |
| Bis(2-mercaptoethyl) sulfide                      | 17.64 | 17.41 | 0.23  |
| Bis(2-methallyl) carbonate                        | 18.75 | 18.45 | 0.30  |
| Bis(2-methoxyethyl)phosphite                      | 17.63 | 17.62 | 0.01  |
| Bis(2-pentoxyethyl)phosphite                      | 32.44 | 32.33 | 0.11  |
| Bis(2-propoxyethyl)phosphite                      | 25.04 | 24.99 | 0.05  |
| Bis(2-tolyl)-N-ethylaminoborane                   | 31.36 | 31.26 | 0.10  |
| Bis(2-tolyl)-N-isobutylaminoborane                | 34.91 | 34.92 | -0.01 |
| Bis(2-tolyl)-N-methylaminoborane                  | 29.33 | 29.44 | -0.11 |
| Bis(3-aminopropyl)amine                           | 15.78 | 15.92 | -0.14 |
| Bis(3-chloropropyl) ether                         | 16.35 | 16.34 | 0.01  |
| Bis(4-tolyl) ether                                | 24.90 | 24.83 | 0.07  |
| Bis(allylamino)borane                             | 16.21 | 16.38 | -0.17 |
| Bis(butoxy fluoro oxophosphorus) oxide            | 23.24 | 23.21 | 0.03  |
| Bis(butylamino)borane                             | 20.31 | 20.30 | 0.01  |
| Bis(butylthio) 2-(diethylmethylsilyl)ethyl borane | 40.34 | 40.54 | -0.20 |
| Bis(butylthio) hexyl borane                       | 35.11 | 34.95 | 0.16  |
| Bis(butylthio) octyl borane                       | 38.97 | 38.62 | 0.35  |
| Bis(butylthio)borane                              | 23.85 | 23.89 | -0.04 |
| Bis(chlorofluorooxophosphorus) oxide              | 11.37 | 11.19 | 0.18  |
| Bis(chloromethyl)ether                            | 8.99  | 8.97  | 0.02  |
| Bis(cyclohexyl)amine                              | 22.55 | 22.46 | 0.09  |
| Bis(diallylamino)borane                           | 26.89 | 27.24 | -0.35 |
| Bis(diethyl)disiloxane                            | 23.21 | 23.19 | 0.02  |
| Bis(diethylamino fluoro oxophosphorus) oxide      | 24.49 | 24.44 | 0.05  |
| Bis(diethylamino fluoro thiophosphorus) oxide     | 30.43 | 30.34 | 0.09  |
| Bis(diethylamino)borane                           | 20.43 | 20.39 | 0.04  |
| Bis(diethylmethylsilyl)amine                      | 27.45 | 27.58 | -0.13 |
| Bis(diethylsilyl)amine                            | 24.34 | 24.28 | 0.06  |
| Bis(di-isoamylamino)borane                        | 42.46 | 42.35 | 0.11  |
| Bis(diisobutylamino)borane                        | 34.99 | 35.01 | -0.02 |
| Bis(dimethylamino)bis(diethylamino)silane         | 31.51 | 31.46 | 0.05  |
| Bis(dimethylphenylsilyl)amine                     | 36.10 | 36.10 | 0.00  |
| Bis(ethoxy fluoro oxophosphorus) oxide            | 15.89 | 15.86 | 0.03  |

|                                         |       |       |       |
|-----------------------------------------|-------|-------|-------|
| Bis(ethyldimethylsilyl)amine            | 24.18 | 23.96 | 0.22  |
| Bis(ethylisobutyl)disiloxane            | 30.50 | 30.50 | 0.00  |
| Bis(ethylphenyl)disiloxane              | 35.22 | 35.33 | -0.11 |
| Bis(ethylthio) butylborane              | 23.86 | 23.93 | -0.07 |
| Bis(ethylthio) isobutylborane           | 23.90 | 23.92 | -0.02 |
| Bis(ethylthio) isopropylborane          | 21.94 | 22.11 | -0.17 |
| Bis(ethylthio) octyl borane             | 31.22 | 31.28 | -0.06 |
| Bis(ethylthio) propylborane             | 22.06 | 22.10 | -0.04 |
| Bis(ethylthio)borane                    | 16.32 | 16.55 | -0.23 |
| Bis(fluoro phenoxy oxophosphorus) oxide | 27.72 | 27.69 | 0.03  |
| Bis(isobutyl) cyclohexylboronate        | 28.72 | 28.59 | 0.13  |
| Bis(isopropylthio)borane                | 20.25 | 20.21 | 0.04  |
| Bis(methoxy fluoro oxophosphorus) oxide | 12.18 | 12.17 | 0.01  |
| Bis(methylthio)methane                  | 12.51 | 12.39 | 0.12  |
| Bis(propylthio)borane                   | 20.13 | 20.22 | -0.09 |
| Bis(t-butylthio)borane                  | 24.49 | 24.18 | 0.31  |
| Bis(trichlorosilyl)methane              | 20.25 | 20.50 | -0.25 |
| Bis(triethylsilyl)amine                 | 31.05 | 31.20 | -0.15 |
| Bis(trihexylsilyl)acetylene             | 76.86 | 76.81 | 0.05  |
| Bis(trimethoxysilyl)amine               | 22.32 | 22.35 | -0.03 |
| Bis(trimethoxysilylamino)dimethylsilane | 30.76 | 30.78 | -0.02 |
| Bis(trimethylsilylamino)dimethylsilane  | 28.47 | 28.76 | -0.29 |
| Bis-N-(2-hydroxyethyl)-2-furfurylamine  | 19.15 | 19.39 | -0.24 |
| Bornyl acetate                          | 21.81 | 21.84 | -0.03 |
| Brassic acid                            | 41.80 | 41.78 | 0.02  |
| Bromal                                  | 14.17 | 14.21 | -0.04 |
| Bromo butylthio isopentylborane         | 25.37 | 25.35 | 0.02  |
| Bromo ethylthio isopentylborane         | 21.61 | 21.68 | -0.07 |
| Bromo ethylthio isopropylborane         | 17.85 | 18.04 | -0.19 |
| Bromo ethylthio phenylborane            | 22.70 | 22.46 | 0.24  |
| Bromo-2-chlorobenzene                   | 15.43 | 15.43 | 0.00  |
| Bromoacetic acid                        | 8.10  | 8.22  | -0.12 |
| Bromoacetone                            | 9.27  | 9.53  | -0.26 |
| Bromoacetyl bromide                     | 10.94 | 10.92 | 0.02  |
| Bromobenzene                            | 13.46 | 13.52 | -0.06 |
| Bromochloroacetic acid                  | 10.21 | 10.10 | 0.11  |
| Bromocycloheptane                       | 15.77 | 15.94 | -0.17 |
| Bromocyclohexane                        | 14.13 | 14.10 | 0.03  |
| Bromocyclopentane                       | 12.28 | 12.26 | 0.02  |
| Bromoethane                             | 7.55  | 7.59  | -0.04 |
| Bromoethylene                           | 7.45  | 7.38  | 0.07  |
| Bromomethylether                        | 8.43  | 8.71  | -0.28 |

|                                               |       |       |       |
|-----------------------------------------------|-------|-------|-------|
| Bromopentafluorobenzene                       | 13.26 | 13.32 | -0.06 |
| Bromotriethylsilane                           | 18.41 | 18.47 | -0.06 |
| Bromotrimethylsilane                          | 13.05 | 13.04 | 0.01  |
| Butadiyne                                     | 6.80  | 6.57  | 0.23  |
| Butanal                                       | 8.34  | 8.40  | -0.06 |
| Butanal oxime                                 | 9.93  | 9.98  | -0.05 |
| Butanamide                                    | 9.64  | 9.44  | 0.20  |
| Butane                                        | 8.20  | 8.19  | 0.01  |
| Butane-1,2,4-triol                            | 9.93  | 9.87  | 0.06  |
| Butane-2,3-dinitrite                          | 13.17 | 13.03 | 0.14  |
| Butanedial                                    | 8.21  | 8.60  | -0.39 |
| Butanedioic acid                              | 9.54  | 9.46  | 0.08  |
| Butanoic acid                                 | 8.80  | 8.82  | -0.02 |
| Butanoic anhydride                            | 15.97 | 16.24 | -0.27 |
| Butanoyl chloride                             | 10.23 | 10.35 | -0.12 |
| Buthiobate                                    | 46.25 | 46.20 | 0.05  |
| Butoxy chloro phenylborine                    | 22.42 | 22.29 | 0.13  |
| Butoxyacetylene                               | 11.67 | 11.76 | -0.09 |
| Butoxybenzene                                 | 18.63 | 18.61 | 0.02  |
| Butoxytrimethylsilane                         | 17.79 | 17.81 | -0.02 |
| Butyl 1-naphthaleneacetate                    | 29.29 | 29.41 | -0.12 |
| Butyl 1-naphthoate                            | 27.72 | 27.57 | 0.15  |
| Butyl 1-naphthylketone                        | 27.00 | 26.99 | 0.01  |
| Butyl 2-(2,3-dihydroxypropoxy)ethyl thioether | 22.25 | 22.30 | -0.05 |
| Butyl 2-hydroxybenzoate                       | 21.52 | 21.16 | 0.36  |
| Butyl 2-methylbutyrate                        | 18.16 | 18.04 | 0.12  |
| Butyl 2-naphthaleneacetate                    | 29.42 | 29.41 | 0.01  |
| Butyl 2-thiophenecarboxylate                  | 20.05 | 19.85 | 0.20  |
| Butyl 4-methylpentoxy dithiophosphinic acid   | 29.54 | 29.52 | 0.02  |
| Butyl 4-oxopentanoate                         | 18.08 | 18.17 | -0.09 |
| Butyl 4-toluenesulfonate                      | 23.72 | 23.70 | 0.02  |
| Butyl butanoate                               | 16.19 | 16.22 | -0.03 |
| Butyl butoxy chloroborine                     | 19.59 | 19.69 | -0.10 |
| Butyl butylxanthate                           | 24.60 | 24.55 | 0.05  |
| Butyl caproate                                | 19.77 | 19.90 | -0.13 |
| Butyl chlorofluorophosphate                   | 13.43 | 13.72 | -0.29 |
| Butyl chloroformate                           | 12.53 | 12.71 | -0.18 |
| Butyl cyanoacetate                            | 14.15 | 14.31 | -0.16 |
| Butyl cyclohexyloxy dithiophosphinic acid     | 28.69 | 28.69 | 0.00  |
| Butyl dibutoxyborine                          | 25.71 | 25.79 | -0.08 |
| Butyl dichloro phosphorus thioxide            | 18.71 | 18.71 | 0.00  |
| Butyl diethyl phosphine oxide                 | 18.92 | 18.91 | 0.01  |

|                                                       |       |       |       |
|-------------------------------------------------------|-------|-------|-------|
| Butyl enanthate                                       | 21.65 | 21.73 | -0.08 |
| Butyl ethoxy dithiophosphinic acid                    | 22.17 | 22.19 | -0.02 |
| Butyl ethoxyethoxy dithiophosphinic acid              | 26.62 | 26.53 | 0.09  |
| Butyl ethoxyethoxy S-(2-cyanoethyl) dithiophosphinate | 31.66 | 31.80 | -0.14 |
| Butyl ethyl carbonate                                 | 14.93 | 14.97 | -0.04 |
| Butyl ethyl sulfide                                   | 15.02 | 15.00 | 0.02  |
| Butyl ethylxanthate                                   | 20.88 | 20.88 | 0.00  |
| Butyl fluorophosphoric acid                           | 12.36 | 12.21 | 0.15  |
| Butyl hydrocinnamate                                  | 23.97 | 24.12 | -0.15 |
| Butyl hydroperoxide                                   | 9.61  | 9.67  | -0.06 |
| Butyl isocyanate                                      | 10.97 | 11.00 | -0.03 |
| Butyl isopropoxy dithiophosphinic acid                | 23.89 | 24.03 | -0.14 |
| Butyl methoxy dithiophosphinic acid                   | 20.43 | 20.34 | 0.09  |
| Butyl N,N-diethylamino phosphorusoxy chloride         | 22.00 | 21.99 | 0.01  |
| Butyl N,N-diethylamino phosphorusoxy fluoride         | 19.48 | 19.63 | -0.15 |
| Butyl octanoate                                       | 23.45 | 23.57 | -0.12 |
| Butyl pentanoate                                      | 17.95 | 18.06 | -0.11 |
| Butyl perfluorooctanoate                              | 24.44 | 24.58 | -0.14 |
| Butyl phenyl sulfide                                  | 21.24 | 21.22 | 0.02  |
| Butyl phenylacetate                                   | 22.15 | 22.29 | -0.14 |
| Butyl phosphorusoxy dichloride                        | 15.41 | 15.42 | -0.01 |
| Butyl propanoate                                      | 14.33 | 14.39 | -0.06 |
| Butyl propyl carbonate                                | 16.77 | 16.80 | -0.03 |
| Butyl ricinoleate                                     | 42.23 | 42.40 | -0.17 |
| Butyl thiocyanate                                     | 13.11 | 13.14 | -0.03 |
| Butyl trifluoroacetate                                | 12.66 | 12.66 | 0.00  |
| Butyl vinyl ether                                     | 12.27 | 12.25 | 0.02  |
| Butylacetamide                                        | 13.40 | 13.20 | 0.20  |
| Butylammonium nitrate                                 | 13.22 | 13.23 | -0.01 |
| Butylbenzene                                          | 17.88 | 17.93 | -0.05 |
| Butylcellosolve                                       | 13.20 | 13.09 | 0.11  |
| Butylcyclohexane                                      | 18.58 | 18.34 | 0.24  |
| Butylcyclopentane                                     | 16.53 | 16.50 | 0.03  |
| Butyldi(3-acetoxypentyl)phosphine                     | 31.94 | 32.10 | -0.16 |
| Butyldi(3-acetoxypentyl)phosphine thioxide            | 34.56 | 34.61 | -0.05 |
| Butyldi(3-aminopentyl)phosphine                       | 26.06 | 26.10 | -0.04 |
| Butyldi(3-aminopentyl)phosphine thioxide              | 28.69 | 28.60 | 0.09  |
| Butyldi(3-cyanopentyl)phosphine                       | 26.79 | 26.88 | -0.09 |
| Butyldi(3-hydroxypentyl)phosphine                     | 24.48 | 24.49 | -0.01 |
| Butyldi(3-hydroxypentyl)phosphine thioxide            | 26.95 | 27.00 | -0.05 |
| Butyldichlorophosphine                                | 15.52 | 15.80 | -0.28 |

|                              |       |       |       |
|------------------------------|-------|-------|-------|
| Butyldimethylamine           | 13.41 | 13.41 | 0.00  |
| Butylethylamine              | 13.26 | 13.20 | 0.06  |
| Butyliodoacetylene           | 15.99 | 16.11 | -0.12 |
| Butylisopropylether          | 14.28 | 14.37 | -0.09 |
| Butylisothiocyanate          | 14.09 | 13.99 | 0.10  |
| Butylmethylketone            | 11.88 | 11.97 | -0.09 |
| Butylnitrate                 | 11.23 | 11.21 | 0.02  |
| Butylphenylboronic acid      | 19.84 | 20.14 | -0.30 |
| Butylphosphonyl difluoride   | 11.26 | 11.23 | 0.03  |
| Butylsilane                  | 12.25 | 12.30 | -0.05 |
| Butylsulfinyl chloride       | 13.93 | 13.88 | 0.05  |
| Butylthiodiethylborane       | 20.69 | 20.69 | 0.00  |
| Butyltrichlorosilane         | 17.12 | 17.15 | -0.03 |
| Butyltriisothiocyanatosilane | 29.30 | 29.23 | 0.07  |
| Butyric acid methylester     | 10.63 | 10.71 | -0.08 |
| Butyrolin                    | 16.36 | 16.20 | 0.16  |
| Butyronitrile                | 8.07  | 8.11  | -0.04 |
| Butyrophenone                | 18.09 | 18.03 | 0.06  |
| Camphene                     | 17.24 | 17.37 | -0.13 |
| Camphor                      | 17.60 | 17.58 | 0.02  |
| Capraldehyde                 | 19.23 | 19.41 | -0.18 |
| Caproic aldehyde             | 11.65 | 12.07 | -0.42 |
| Caprolactone                 | 11.54 | 11.71 | -0.17 |
| Caproic acid                 | 19.66 | 19.71 | -0.05 |
| Caprylene                    | 15.37 | 15.41 | -0.04 |
| Caprylic aldehyde            | 15.72 | 15.74 | -0.02 |
| Caprylonitrile               | 15.45 | 15.45 | 0.00  |
| Carbitol                     | 13.90 | 13.76 | 0.14  |
| Carbitol acetate             | 17.56 | 17.56 | 0.00  |
| Carbon suboxide              | 6.55  | 6.57  | -0.02 |
| Carbonyl dicyanide           | 6.72  | 6.29  | 0.43  |
| Carvacrylmethylketone        | 22.15 | 21.83 | 0.32  |
| Carvenone                    | 18.47 | 18.38 | 0.09  |
| Carvone                      | 18.11 | 18.30 | -0.19 |
| Cedrene                      | 25.56 | 25.72 | -0.16 |
| Cedrol                       | 26.53 | 26.31 | 0.22  |
| Cetane                       | 30.16 | 30.21 | -0.05 |
| Cetene                       | 30.09 | 30.09 | 0.00  |
| Cetyl palmitate              | 60.45 | 60.27 | 0.18  |
| Chloral                      | 10.54 | 10.56 | -0.02 |
| Chlordimeform                | 22.62 | 22.47 | 0.15  |
| Chloro 2-octoxy phenylborine | 29.50 | 29.63 | -0.13 |



|                                         |       |       |       |
|-----------------------------------------|-------|-------|-------|
| Chloro di(1,2,2-trimethylpropoxy)borine | 27.47 | 27.49 | -0.02 |
| Chloro di(2-octoxy)borine               | 34.62 | 34.85 | -0.23 |
| Chloro di(sec-butoxy)borine             | 20.09 | 20.17 | -0.08 |
| Chloro dibutoxyborine                   | 20.23 | 20.16 | 0.07  |
| Chloro diisobutoxyborine                | 19.96 | 20.13 | -0.17 |
| Chloro dineopentoxyborine               | 23.92 | 23.82 | 0.10  |
| Chloro dioctoxyborine                   | 35.00 | 34.84 | 0.16  |
| Chloro dipropoxyborine                  | 16.58 | 16.49 | 0.09  |
| Chloro(chloromethyl)dimethylsilane      | 13.65 | 13.68 | -0.03 |
| Chloro(dichloromethyl)dimethylsilane    | 15.61 | 15.63 | -0.02 |
| Chloro(methylthio)methane               | 9.70  | 9.49  | 0.21  |
| Chloro-2,3-dinitrobenzene               | 17.98 | 17.71 | 0.27  |
| Chloroacetic acid                       | 6.96  | 7.06  | -0.10 |
| Chloroacetic acid ethylester            | 10.64 | 10.79 | -0.15 |
| Chloroacetone                           | 8.51  | 8.36  | 0.15  |
| Chloroacetone cyanohydrin               | 10.66 | 10.55 | 0.11  |
| Chloroacetonitrile                      | 6.35  | 6.34  | 0.01  |
| Chloroacetyl chloride                   | 8.52  | 8.59  | -0.07 |
| Chloroacetylene                         | 6.07  | 5.86  | 0.21  |
| Chlorobenzene                           | 12.35 | 12.42 | -0.07 |
| Chlorocyclohexane                       | 12.94 | 12.90 | 0.04  |
| Chlorocyclopentane                      | 11.11 | 11.06 | 0.05  |
| Chlorodiethylsilane                     | 13.84 | 13.76 | 0.08  |
| Chlorodimethylphenylsilane              | 19.55 | 19.70 | -0.15 |
| Chlorodimethylsilane                    | 10.27 | 10.13 | 0.14  |
| Chloroethane                            | 6.46  | 6.42  | 0.04  |
| Chloroethyldimethylsilane               | 13.93 | 13.63 | 0.30  |
| Chloroethylene                          | 6.15  | 6.26  | -0.11 |
| Chloroethylene carbonate                | 8.74  | 8.73  | 0.01  |
| Chloromethyl methyl ether               | 7.25  | 7.07  | 0.18  |
| Chloromethylacetate                     | 8.91  | 8.94  | -0.03 |
| Chloromethylchloroformate               | 8.96  | 9.09  | -0.13 |
| Chloromethylphenylsilane                | 18.02 | 18.01 | 0.01  |
| Chloromethylsulfonyl fluoride           | 8.19  | 8.41  | -0.22 |
| Chloroprene                             | 10.02 | 9.89  | 0.13  |
| Chloroprotham                           | 22.48 | 22.23 | 0.25  |
| Chlorotriethylsilane                    | 17.26 | 17.26 | 0.00  |
| Chlorotrimethylsilane                   | 11.84 | 11.82 | 0.02  |
| Chlorovinyl dimethylsilane              | 13.67 | 13.48 | 0.19  |
| Chlorthion                              | 26.79 | 26.43 | 0.36  |
| cis- Cyclooctene                        | 14.38 | 14.60 | -0.22 |
| cis-(1-Methyl-1-propenyl)benzene        | 17.89 | 17.87 | 0.02  |

|                                                                |       |       |       |
|----------------------------------------------------------------|-------|-------|-------|
| cis,trans,trans-1,5,9-Cyclododecatriene                        | 21.51 | 21.79 | -0.28 |
| cis-1,2,3,5,6,8a-Hexahydro-4,7-dimethyl-1-isopropylnaphthalene | 26.40 | 26.56 | -0.16 |
| cis-1,2-Bis(trimethylsilyl)-3,3-dichlorocyclopropane           | 28.29 | 27.99 | 0.30  |
| cis-1,2-Dibromoethylene                                        | 10.16 | 10.42 | -0.26 |
| cis-1,2-Dichlorocyclohexane                                    | 14.76 | 14.79 | -0.03 |
| cis-1,2-Dichloroethylene                                       | 8.03  | 8.16  | -0.13 |
| cis-1,2-Dimethylcyclohexane                                    | 14.61 | 14.65 | -0.04 |
| cis-1,2-Dimethylcyclopentane                                   | 12.88 | 12.82 | 0.06  |
| cis-1,2-Dimethylcyclopropane                                   | 9.41  | 9.14  | 0.27  |
| cis-1,2-Dis(trimethylsilyl)-ethylene                           | 22.94 | 23.01 | -0.07 |
| cis-1,2-Divinylcyclobutane                                     | 14.56 | 14.41 | 0.15  |
| cis-1,3-Dichloro-2-butene                                      | 11.99 | 11.96 | 0.03  |
| cis-1,3-Dichloropropene                                        | 9.99  | 10.08 | -0.09 |
| cis-1,3-Dimethylcyclohexane                                    | 14.79 | 14.65 | 0.14  |
| cis-1,3-Dimethylcyclopentane                                   | 13.00 | 12.82 | 0.18  |
| cis-1,3-Pentadiene                                             | 10.22 | 9.82  | 0.40  |
| cis-1,4-Dichloro-2-butene                                      | 12.03 | 11.92 | 0.11  |
| cis-1,4-Dimethylcyclohexane                                    | 14.47 | 14.65 | -0.18 |
| cis-1,4-Hexadiene                                              | 11.48 | 11.66 | -0.18 |
| cis-1-Bromo-1-butene                                           | 10.92 | 11.10 | -0.18 |
| cis-1-Bromopropene                                             | 9.12  | 9.26  | -0.14 |
| cis-1-Chloro-1-butene                                          | 9.84  | 9.97  | -0.13 |
| cis-1-Chloropropene                                            | 7.96  | 8.13  | -0.17 |
| cis-1-Ethyl-2-methylcyclopentane                               | 14.62 | 14.65 | -0.03 |
| cis-1-Ethyl-3-methylcyclopentane                               | 14.58 | 14.65 | -0.07 |
| cis-1-Methyl-2-propylcyclopentane                              | 16.55 | 16.49 | 0.06  |
| cis-1-Methyl-4-isopropylcyclohexane                            | 18.34 | 18.31 | 0.03  |
| cis-1-Phenyl-1-propene                                         | 16.22 | 16.01 | 0.21  |
| cis-2,2,5,5-Tetramethyl-3-hexene                               | 19.19 | 19.11 | 0.08  |
| cis-2,2-Dimethyl-3-hexene                                      | 15.55 | 15.44 | 0.11  |
| cis-2,3-Epoxybutane                                            | 8.05  | 8.02  | 0.03  |
| cis-2,4,6-Trimethyl-1,3,5-trioxane                             | 12.91 | 12.83 | 0.08  |
| cis-2-Bromo-2-butene                                           | 10.99 | 11.05 | -0.06 |
| cis-2-Butene-1,4-diol                                          | 9.24  | 9.23  | 0.01  |
| cis-2-Chloro-2-butene                                          | 9.91  | 10.06 | -0.15 |
| cis-2-Heptene                                                  | 13.51 | 13.62 | -0.11 |
| cis-2-Hexen-1-ol                                               | 12.34 | 12.34 | 0.00  |
| cis-2-Hexene                                                   | 11.80 | 11.78 | 0.02  |
| cis-2-Methoxy-4-(1-propenyl)phenol                             | 19.78 | 19.30 | 0.48  |
| cis-2-Methyl-1,3-pentadiene                                    | 12.16 | 11.69 | 0.47  |
| cis-2-Methyl-3-hexene                                          | 13.70 | 13.60 | 0.10  |

|                                            |       |       |       |
|--------------------------------------------|-------|-------|-------|
| cis-2-Methylcyclohexanol                   | 13.34 | 13.39 | -0.05 |
| cis-2-Methylcyclopentanol                  | 11.38 | 11.56 | -0.18 |
| cis-2-Octene                               | 15.38 | 15.45 | -0.07 |
| cis-2-Penten-1-ol                          | 10.45 | 10.50 | -0.05 |
| cis-2-Pentene                              | 9.89  | 9.95  | -0.06 |
| cis-3,3,5-Trimethylcyclohexanol            | 16.99 | 17.06 | -0.07 |
| cis-3,4-Dimethyl-2-pentene                 | 13.61 | 13.63 | -0.02 |
| cis-3,7-Dimethyl-2,6-octadien-1-ol acetate | 23.19 | 23.46 | -0.27 |
| cis-3-Heptene                              | 13.60 | 13.62 | -0.02 |
| cis-3-Hexen-1-ol                           | 12.29 | 12.34 | -0.05 |
| cis-3-Hexenal                              | 11.78 | 11.99 | -0.21 |
| cis-3-Hexene                               | 11.79 | 11.78 | 0.01  |
| cis-3-Methyl-2-heptene                     | 15.50 | 15.48 | 0.02  |
| cis-3-Methyl-2-hexene                      | 13.62 | 13.64 | -0.02 |
| cis-3-Methyl-3-hexene                      | 13.70 | 13.64 | 0.06  |
| cis-3-Methylcyclohexanol                   | 13.42 | 13.39 | 0.03  |
| cis-3-Octene                               | 15.51 | 15.45 | 0.06  |
| cis-3-Penten-1-yne                         | 9.40  | 9.14  | 0.26  |
| cis-3-Phenyl-2-propen-1-ol                 | 17.00 | 16.57 | 0.43  |
| cis-4,4-Dimethyl-2-pentene                 | 13.65 | 13.61 | 0.04  |
| cis-4-Methyl-2-hexene                      | 13.65 | 13.60 | 0.05  |
| cis-4-Methylcyclohexanol                   | 13.43 | 13.39 | 0.04  |
| cis-4-Octene                               | 15.44 | 15.45 | -0.01 |
| cis-4-Undecene                             | 20.96 | 20.96 | 0.00  |
| cis-5-Decene                               | 19.13 | 19.12 | 0.01  |
| cis-5-Methyl-2-hexene                      | 13.66 | 13.60 | 0.06  |
| cis-5-Undecene                             | 20.97 | 20.96 | 0.01  |
| cis-9-Octadecenitrile                      | 33.56 | 33.72 | -0.16 |
| cis-alpha-Bisabolene                       | 26.91 | 27.32 | -0.41 |
| cis-Benzaldehyde oxime                     | 14.60 | 14.21 | 0.39  |
| cis-Chlorobromoethylene                    | 9.19  | 9.29  | -0.10 |
| cis-Crotyl alcohol                         | 8.60  | 8.67  | -0.07 |
| cis-Cyclohexyl-1,2-diamine                 | 13.77 | 13.68 | 0.09  |
| cis-Decalin                                | 17.40 | 17.47 | -0.07 |
| cis-Nerolidol                              | 29.02 | 28.69 | 0.33  |
| cis-Tetrahydro-2,5-dimethylthiophene       | 14.19 | 14.14 | 0.05  |
| cis-Verbenol                               | 18.09 | 17.98 | 0.11  |
| Citronellal                                | 19.17 | 19.34 | -0.17 |
| Citronellene                               | 18.86 | 19.01 | -0.15 |
| Colamine                                   | 6.44  | 6.44  | 0.00  |
| Coprostane                                 | 46.88 | 46.88 | 0.00  |
| Crotonaldehyde                             | 8.54  | 8.32  | 0.22  |

|                              |       |       |       |
|------------------------------|-------|-------|-------|
| Crotonic acid                | 9.09  | 8.74  | 0.35  |
| Crotonic acid anhydride      | 16.53 | 16.08 | 0.45  |
| Cumene                       | 15.98 | 16.07 | -0.09 |
| Cumic alcohol                | 18.47 | 18.54 | -0.07 |
| Cumylamine                   | 17.24 | 17.42 | -0.18 |
| Cuscohygrine                 | 26.10 | 26.12 | -0.02 |
| Cyanamide                    | 3.44  | 3.69  | -0.25 |
| Cyanoacetylene               | 5.83  | 5.46  | 0.37  |
| Cyanoethylene                | 6.24  | 6.15  | 0.09  |
| Cyanogen                     | 4.48  | 4.35  | 0.13  |
| Cyclobutane                  | 7.23  | 7.34  | -0.11 |
| Cyclobutanecarboxylic acid   | 9.87  | 9.80  | 0.07  |
| Cyclobutanol                 | 8.13  | 7.90  | 0.23  |
| Cyclobutanone                | 7.39  | 7.45  | -0.06 |
| Cyclobutylamine              | 8.86  | 8.67  | 0.19  |
| Cyclobutylphenylketone       | 19.27 | 19.00 | 0.27  |
| Cyclodecane                  | 18.22 | 18.35 | -0.13 |
| Cyclodecanol                 | 18.73 | 18.92 | -0.19 |
| Cyclodecanone                | 18.01 | 18.46 | -0.45 |
| Cyclododecanone              | 21.73 | 22.13 | -0.40 |
| Cyclogeraniolane             | 16.85 | 16.49 | 0.36  |
| Cycloheptane                 | 12.76 | 12.85 | -0.09 |
| Cycloheptanol                | 13.34 | 13.41 | -0.07 |
| Cycloheptene                 | 12.58 | 12.77 | -0.19 |
| Cyclohexane                  | 10.99 | 11.01 | -0.02 |
| Cyclohexanecarbonitrile      | 12.67 | 12.75 | -0.08 |
| Cyclohexanecarbonyl chloride | 14.82 | 15.00 | -0.18 |
| Cyclohexanecarboxaldehyde    | 13.22 | 13.04 | 0.18  |
| Cyclohexanecarboxylic acid   | 13.29 | 13.47 | -0.18 |
| Cyclohexaneethanol           | 15.20 | 15.23 | -0.03 |
| Cyclohexanemethanamine       | 14.21 | 14.19 | 0.02  |
| Cyclohexanemethanol          | 13.45 | 13.39 | 0.06  |
| Cyclohexanethiol             | 14.14 | 14.05 | 0.09  |
| Cyclohexanol                 | 11.56 | 11.57 | -0.01 |
| Cyclohexanone                | 11.05 | 11.12 | -0.07 |
| Cyclohexene                  | 10.72 | 10.93 | -0.21 |
| Cyclohexyl acetate           | 15.41 | 15.38 | 0.03  |
| Cyclohexyl acrylate          | 17.32 | 17.09 | 0.23  |
| Cyclohexyl benzoate          | 23.61 | 23.28 | 0.33  |
| Cyclohexyl formate           | 13.39 | 13.60 | -0.21 |
| Cyclohexyl iodide            | 16.27 | 16.25 | 0.02  |
| Cyclohexyl isothiocyanate    | 16.92 | 16.79 | 0.13  |

|                              |       |       |       |
|------------------------------|-------|-------|-------|
| Cyclohexyl methacrylate      | 18.90 | 18.96 | -0.06 |
| Cyclohexyl propanoate        | 17.45 | 17.22 | 0.23  |
| Cyclohexyl thiocyanate       | 15.97 | 15.96 | 0.01  |
| Cyclohexylacetic acid        | 15.29 | 15.30 | -0.01 |
| Cyclohexylamine              | 12.41 | 12.34 | 0.07  |
| Cyclohexyldichloroborane     | 16.64 | 16.61 | 0.03  |
| Cyclohexylhydroperoxide      | 12.48 | 12.50 | -0.02 |
| Cyclohexylideneacetonitrile  | 14.47 | 14.55 | -0.08 |
| Cyclohexylisocyanate         | 13.74 | 13.79 | -0.05 |
| Cyclohexylisopropylamine     | 17.45 | 17.80 | -0.35 |
| Cyclohexyloxytrimethylsilane | 20.66 | 20.64 | 0.02  |
| Cyclohexylphosphine          | 15.11 | 15.00 | 0.11  |
| Cyclohexyltrifluorosilane    | 13.58 | 13.62 | -0.04 |
| Cyclononane                  | 16.40 | 16.52 | -0.12 |
| Cyclononanone                | 16.31 | 16.63 | -0.32 |
| Cyclooctane                  | 14.56 | 14.68 | -0.12 |
| Cyclooctanol                 | 15.01 | 15.25 | -0.24 |
| Cyclooctanone                | 14.55 | 14.79 | -0.24 |
| Cyclooctatetraene            | 14.03 | 14.37 | -0.34 |
| Cyclooctyne                  | 14.16 | 14.09 | 0.07  |
| Cyclopentadecane             | 27.27 | 27.53 | -0.26 |
| Cyclopentadecanone           | 27.58 | 27.64 | -0.06 |
| Cyclopentadiene              | 8.68  | 9.02  | -0.34 |
| Cyclopentane                 | 9.17  | 9.18  | -0.01 |
| Cyclopentanecarbonitrile     | 10.92 | 10.91 | 0.01  |
| Cyclopentanecarboxaldehyde   | 11.01 | 11.20 | -0.19 |
| Cyclopentanecarboxylic acid  | 11.62 | 11.63 | -0.01 |
| Cyclopentanemethanol         | 11.61 | 11.56 | 0.05  |
| Cyclopentanepropanoic acid   | 15.20 | 15.30 | -0.10 |
| Cyclopentanol                | 9.73  | 9.74  | -0.01 |
| Cyclopentanone               | 9.20  | 9.28  | -0.08 |
| Cyclopentene                 | 8.90  | 9.10  | -0.20 |
| Cyclopentyl acetate          | 13.51 | 13.54 | -0.03 |
| Cyclopentyl formate          | 11.71 | 11.76 | -0.05 |
| Cyclopentyl methyl ether     | 11.66 | 11.67 | -0.01 |
| Cyclopentylacetic acid       | 13.43 | 13.47 | -0.04 |
| Cyclopentylamine             | 10.89 | 10.51 | 0.38  |
| Cyclopentylbenzene           | 18.86 | 18.90 | -0.04 |
| Cyclopentylphosphine         | 13.27 | 13.16 | 0.11  |
| Cyclopropanecarbonitrile     | 7.57  | 7.24  | 0.33  |
| Cyclopropanecarboxaldehyde   | 7.65  | 7.53  | 0.12  |
| Cyclopropanecarboxylic acid  | 8.25  | 7.96  | 0.29  |

|                                  |       |       |       |
|----------------------------------|-------|-------|-------|
| Cyclopropyl methyl ether         | 8.18  | 8.00  | 0.18  |
| Cyclopropylamine                 | 6.96  | 6.84  | 0.12  |
| Cyclopropylbenzene               | 15.50 | 15.23 | 0.27  |
| Cyclopropylcyclohexane           | 15.99 | 15.64 | 0.35  |
| Cytosine                         | 10.30 | 10.39 | -0.09 |
| DBCP                             | 14.33 | 14.41 | -0.08 |
| Decahydro-2-naphthol             | 18.03 | 18.04 | -0.01 |
| Decamethylcyclopentasiloxane     | 37.00 | 36.96 | 0.04  |
| Decamethyltetrasiloxane          | 34.16 | 34.19 | -0.03 |
| Decane                           | 19.19 | 19.20 | -0.01 |
| Decanedioic acid                 | 20.41 | 20.47 | -0.06 |
| Decanedioyl dichloride           | 23.52 | 23.53 | -0.01 |
| Decanenitrile                    | 19.13 | 19.12 | 0.01  |
| Decanoyl chloride                | 21.72 | 21.37 | 0.35  |
| Decyl decanoate                  | 38.20 | 38.25 | -0.05 |
| Decyl thiocyanate                | 24.16 | 24.16 | 0.00  |
| Decyl vinyl ether                | 23.46 | 23.26 | 0.20  |
| Decylbenzene                     | 28.91 | 28.94 | -0.03 |
| Decylcyclohexane                 | 29.40 | 29.35 | 0.05  |
| Decylcyclopentane                | 27.54 | 27.51 | 0.03  |
| Decyldiphenylnonylsilane         | 58.94 | 58.94 | 0.00  |
| Decyldiphenylsilane              | 42.31 | 42.43 | -0.12 |
| Decyloxytrimethylsilane          | 28.82 | 28.82 | 0.00  |
| DEET                             | 23.19 | 23.16 | 0.03  |
| DEHP                             | 45.10 | 45.05 | 0.05  |
| Demanyl phosphate                | 14.26 | 14.42 | -0.16 |
| Di(2-chloroethyl) chloromaleate  | 22.80 | 22.59 | 0.21  |
| Di(2-ethylhexyl) fumarate        | 39.12 | 38.83 | 0.29  |
| Di(2-ethylhexyl) maleate         | 38.79 | 38.83 | -0.04 |
| Di(cyclohexyloxy)dimethylsilane  | 29.34 | 29.26 | 0.08  |
| Di-2-propenyldiethyleneglycol    | 20.91 | 21.01 | -0.10 |
| Di-3-tolylphosphorous aziridide  | 33.13 | 33.06 | 0.07  |
| Di-3-tolylthiophosphoric aziride | 35.32 | 35.27 | 0.05  |
| Di-4-tolylphosphorous aziridide  | 33.16 | 33.06 | 0.10  |
| Di-4-tolylthiophosphoric aziride | 35.43 | 35.27 | 0.16  |
| Diacetoxymethane                 | 11.24 | 11.33 | -0.09 |
| Diacetyethylamine                | 13.67 | 13.30 | 0.37  |
| Diallyl fumarate                 | 20.04 | 20.26 | -0.22 |
| Diallyl maleate                  | 20.18 | 20.26 | -0.08 |
| Diallyl oxalate                  | 16.68 | 16.67 | 0.01  |
| Diallyl succinate                | 20.16 | 20.34 | -0.18 |
| Diallylamine                     | 12.78 | 12.95 | -0.17 |

|                                     |       |       |       |
|-------------------------------------|-------|-------|-------|
| Diallyldimethylsilane               | 19.16 | 19.07 | 0.09  |
| Diallylsulfoxide                    | 15.08 | 15.10 | -0.02 |
| Diamyl isophthalate                 | 34.17 | 34.07 | 0.10  |
| Diamyl terephthalate                | 34.27 | 34.07 | 0.20  |
| Diamylamine                         | 20.61 | 20.54 | 0.07  |
| Diamylsilane                        | 23.23 | 23.21 | 0.02  |
| Dibenzosuberone                     | 25.32 | 25.23 | 0.09  |
| Dibenzyl ether                      | 24.66 | 24.66 | 0.00  |
| Dibenzyl malonate                   | 31.32 | 30.88 | 0.44  |
| Dibenzylamine                       | 25.16 | 25.33 | -0.17 |
| Dibromoacetonitrile                 | 10.43 | 10.49 | -0.06 |
| Dibutoxy 2-hydroxyethoxy borine     | 23.58 | 23.26 | 0.32  |
| Dibutoxy butyl phosphorus           | 27.61 | 27.43 | 0.18  |
| Dibutoxymethane                     | 18.76 | 18.62 | 0.14  |
| Dibutoxyphosphinylsulfenyl chloride | 25.10 | 25.09 | 0.01  |
| Dibutoxythiophosphonate             | 22.35 | 22.60 | -0.25 |
| Dibutyl 3-oxo-2-butyl phosphate     | 28.03 | 27.79 | 0.24  |
| Dibutyl adipate                     | 27.91 | 27.93 | -0.02 |
| Dibutyl azodicarboxylate            | 22.94 | 23.09 | -0.15 |
| Dibutyl butanephosphonate           | 27.10 | 27.05 | 0.05  |
| Dibutyl butylamino thiophosphate    | 31.33 | 31.37 | -0.04 |
| Dibutyl carbonate                   | 18.57 | 18.64 | -0.07 |
| Dibutyl chloromaleate               | 26.31 | 26.13 | 0.18  |
| Dibutyl decanedioate                | 35.16 | 35.27 | -0.11 |
| Dibutyl decanephosphonate           | 37.86 | 38.06 | -0.20 |
| Dibutyl dodecanephosphonate         | 41.64 | 41.73 | -0.09 |
| Dibutyl ether                       | 16.26 | 16.20 | 0.06  |
| Dibutyl ethylphosphonate            | 23.38 | 23.38 | 0.00  |
| Dibutyl fumarate                    | 24.54 | 24.18 | 0.36  |
| Dibutyl heptanephosphonate          | 32.51 | 32.55 | -0.04 |
| Dibutyl hexadecanephosphonate       | 48.88 | 49.07 | -0.19 |
| Dibutyl hexanephosphonate           | 30.63 | 30.72 | -0.09 |
| Dibutyl isophthalate                | 30.54 | 30.40 | 0.14  |
| Dibutyl maleate                     | 24.18 | 24.18 | 0.00  |
| Dibutyl malonate                    | 22.37 | 22.42 | -0.05 |
| Dibutyl nonanephosphonate           | 36.12 | 36.22 | -0.10 |
| Dibutyl O-butyl phosphorus oxide    | 26.65 | 26.80 | -0.15 |
| Dibutyl octadecanephosphonate       | 52.65 | 52.74 | -0.09 |
| Dibutyl octanephosphonate           | 34.36 | 34.39 | -0.03 |
| Dibutyl oxalate                     | 20.70 | 20.59 | 0.11  |
| Dibutyl pentanephosphonate          | 28.81 | 28.88 | -0.07 |
| Dibutyl phosphite                   | 19.86 | 19.98 | -0.12 |

|                                      |       |       |       |
|--------------------------------------|-------|-------|-------|
| Dibutyl phthalate                    | 30.54 | 30.40 | 0.14  |
| Dibutyl suberate                     | 31.49 | 31.60 | -0.11 |
| Dibutyl succinate                    | 24.18 | 24.26 | -0.08 |
| Dibutyl tartrate                     | 25.37 | 25.39 | -0.02 |
| Dibutyl terephthalate                | 30.65 | 30.40 | 0.25  |
| Dibutyl tetradecanephosphonate       | 45.30 | 45.40 | -0.10 |
| Dibutyl thiophosphoryl chloride      | 24.90 | 24.77 | 0.13  |
| Dibutylacetamide                     | 20.66 | 20.69 | -0.03 |
| Dibutylamine                         | 16.82 | 16.87 | -0.05 |
| Dibutylboronic anhydride             | 34.26 | 34.56 | -0.30 |
| Dibutylbutylaminoborane              | 26.04 | 25.92 | 0.12  |
| Dibutyldiisothiocyanatosilane        | 30.83 | 30.86 | -0.03 |
| Dibutyldinonylsilane                 | 52.14 | 52.30 | -0.16 |
| Dibutyldisulfide                     | 21.87 | 21.92 | -0.05 |
| Dibutylethylthioborane               | 24.37 | 24.36 | 0.01  |
| Dibutylmethylsilyl bromide           | 24.04 | 24.00 | 0.04  |
| Dibutylnonylsilane                   | 35.74 | 35.80 | -0.06 |
| Dibutylphenylaminoborane             | 28.75 | 28.77 | -0.02 |
| Dibutylphenylthioborane              | 30.31 | 30.45 | -0.14 |
| Dibutylphosphine                     | 19.49 | 19.57 | -0.08 |
| Dibutylphosphinic chloride           | 19.35 | 19.34 | 0.01  |
| Dibutylsilane                        | 19.58 | 19.54 | 0.04  |
| Dibutylsulfide                       | 18.69 | 18.67 | 0.02  |
| Dibutyltrisulfide                    | 25.39 | 25.44 | -0.05 |
| Dichloro 4-chlorobutoxyborine        | 16.15 | 16.11 | 0.04  |
| Dichloro butoxyborine                | 14.28 | 14.21 | 0.07  |
| Dichloro isobutoxyborine             | 14.49 | 14.20 | 0.29  |
| Dichloro neopentoxyborine            | 16.06 | 16.04 | 0.02  |
| Dichloro octoxyborine                | 21.35 | 21.55 | -0.20 |
| Dichloro propoxyborine               | 12.14 | 12.38 | -0.24 |
| Dichloro(chloromethyl)methylsilane   | 13.54 | 13.59 | -0.05 |
| Dichloro(dichloromethyl)methylsilane | 15.51 | 15.55 | -0.04 |
| Dichloroacetic acid                  | 9.05  | 8.98  | 0.07  |
| Dichloroacetonitrile                 | 8.38  | 8.26  | 0.12  |
| Dichloroacetyl chloride              | 10.43 | 10.51 | -0.08 |
| Dichlorodiethylsilane                | 15.34 | 15.36 | -0.02 |
| Dichlorodimethylsilane               | 11.75 | 11.74 | 0.01  |
| Dichlorodiphenylsilane               | 27.74 | 27.50 | 0.24  |
| Dichloromethylphenylsilane           | 19.35 | 19.62 | -0.27 |
| Dichloromethylphosphine              | 10.35 | 10.34 | 0.01  |
| Dichlorophenylphosphine              | 17.97 | 17.98 | -0.01 |
| Dicosamethyldecasiloxane             | 78.29 | 78.55 | -0.26 |



|                                                 |       |       |       |
|-------------------------------------------------|-------|-------|-------|
| Dicyanomethane                                  | 6.22  | 6.19  | 0.03  |
| Dicyclohexyl ether                              | 22.02 | 21.85 | 0.17  |
| Dicyclopropyl ketone                            | 12.40 | 12.07 | 0.33  |
| Didecyl isophthalate                            | 52.61 | 52.42 | 0.19  |
| Didecyldiphenylsilane                           | 60.81 | 60.77 | 0.04  |
| Diethanolamine                                  | 10.75 | 10.64 | 0.11  |
| Diethoxy butyl phosphorus                       | 20.39 | 20.09 | 0.30  |
| Diethoxy ethyl phosphorus                       | 16.70 | 16.42 | 0.28  |
| Diethoxy fluorophosphate                        | 12.26 | 12.39 | -0.13 |
| Diethoxy propyl phosphorus                      | 18.53 | 18.25 | 0.28  |
| Diethoxydimethylsilane                          | 16.25 | 16.27 | -0.02 |
| Diethoxydiphenylsilane                          | 32.14 | 32.03 | 0.11  |
| Diethoxymethylphenylsilane                      | 24.12 | 24.15 | -0.03 |
| Diethoxymethylsilane                            | 14.60 | 14.54 | 0.06  |
| Diethoxyphosphinylsulfenyl chloride             | 17.77 | 17.75 | 0.02  |
| Diethyl 1,1-cyclobutanedicarboxylate            | 19.73 | 19.73 | 0.00  |
| Diethyl 1-azepanyl thiophosphate                | 26.84 | 26.97 | -0.13 |
| Diethyl 2,2-diethylhydrazinosilane              | 21.97 | 22.14 | -0.17 |
| Diethyl 2,2-dimethylhydrazinosilane             | 18.39 | 18.50 | -0.11 |
| Diethyl 2-acetylsuccinate                       | 20.68 | 20.68 | 0.00  |
| Diethyl 2-aminomalonate                         | 16.48 | 16.41 | 0.07  |
| Diethyl 2-butylmalonate                         | 22.45 | 22.41 | 0.04  |
| Diethyl 2-methoxycarbonyl ethyl phosphine oxide | 19.59 | 19.59 | 0.00  |
| Diethyl 3-oxo-2-butyl phosphate                 | 20.30 | 20.45 | -0.15 |
| Diethyl adipate                                 | 20.44 | 20.59 | -0.15 |
| Diethyl allylmalonate                           | 20.33 | 20.45 | -0.12 |
| Diethyl azelate                                 | 25.98 | 26.10 | -0.12 |
| Diethyl azodicarboxylate                        | 15.76 | 15.75 | 0.01  |
| Diethyl benzylmalonate                          | 26.53 | 26.64 | -0.11 |
| Diethyl bis(2,2-diethylhydrazino)silane         | 32.18 | 32.06 | 0.12  |
| Diethyl bis(2,2-dimethylhydrazino)silane        | 24.76 | 24.78 | -0.02 |
| Diethyl bromomalonate                           | 18.23 | 18.17 | 0.06  |
| Diethyl butoxy phosphorus                       | 19.94 | 19.93 | 0.01  |
| Diethyl butylamino thiophosphate                | 23.97 | 24.03 | -0.06 |
| Diethyl cellosolve                              | 13.29 | 13.20 | 0.09  |
| Diethyl chloromalonate                          | 16.64 | 16.97 | -0.33 |
| Diethyl cyclopropane-1,1-dicarboxylate          | 18.24 | 17.90 | 0.34  |
| Diethyl decanedioate                            | 27.85 | 27.93 | -0.08 |
| Diethyl decoxy phosphorus                       | 30.95 | 30.94 | 0.01  |
| Diethyl dibutylmalonate                         | 29.74 | 29.76 | -0.02 |
| Diethyl dicarbonate                             | 13.79 | 13.73 | 0.06  |
| Diethyl diethylaminosilane                      | 20.75 | 20.64 | 0.11  |

|                                               |       |       |       |
|-----------------------------------------------|-------|-------|-------|
| Diethyl disulfide                             | 14.53 | 14.58 | -0.05 |
| Diethyl ethoxy phosphorus                     | 16.26 | 16.26 | 0.00  |
| Diethyl ethoxycarbonylmethyl phosphorus oxide | 19.58 | 19.60 | -0.02 |
| Diethyl ethylidenemalonate                    | 18.36 | 18.70 | -0.34 |
| Diethyl ethylmalonate                         | 18.63 | 18.74 | -0.11 |
| Diethyl ethylphenylmalonate                   | 28.26 | 28.48 | -0.22 |
| Diethyl ethylphosphonate                      | 16.12 | 16.03 | 0.09  |
| Diethyl fumarate                              | 17.25 | 16.84 | 0.41  |
| Diethyl glutaconate                           | 18.58 | 18.67 | -0.09 |
| Diethyl glutarate                             | 18.63 | 18.75 | -0.12 |
| Diethyl heptoxy phosphorus                    | 25.44 | 25.43 | 0.01  |
| Diethyl hexoxy phosphorus                     | 23.60 | 23.60 | 0.00  |
| Diethyl isobutoxy phosphorus                  | 20.03 | 19.91 | 0.12  |
| Diethyl isobutylmalonate                      | 22.30 | 22.39 | -0.09 |
| Diethyl isophthalate                          | 23.37 | 23.05 | 0.32  |
| Diethyl isopropoxy phosphorus                 | 18.15 | 18.10 | 0.05  |
| Diethyl isopropylidenemalonate                | 20.69 | 20.57 | 0.12  |
| Diethyl isopropylmalonate                     | 20.32 | 20.56 | -0.24 |
| Diethyl itaconate                             | 18.50 | 18.66 | -0.16 |
| Diethyl ketomalonate                          | 15.65 | 15.19 | 0.46  |
| Diethyl malate                                | 17.41 | 17.48 | -0.07 |
| Diethyl maleate                               | 16.93 | 16.84 | 0.09  |
| Diethyl malonate                              | 15.04 | 15.08 | -0.04 |
| Diethyl methylmalonate                        | 16.83 | 16.90 | -0.07 |
| Diethyl methylphosphonate                     | 14.36 | 14.25 | 0.11  |
| Diethyl methylsuccinate                       | 18.62 | 18.74 | -0.12 |
| Diethyl N,N-diethylamino phosphate            | 20.99 | 20.92 | 0.07  |
| Diethyl nonoxy phosphorus                     | 28.97 | 29.10 | -0.13 |
| Diethyl octoxy phosphorus                     | 27.21 | 27.27 | -0.06 |
| Diethyl O-ethyl phospsphorus oxide            | 15.63 | 15.78 | -0.15 |
| Diethyl oxalate                               | 13.31 | 13.25 | 0.06  |
| Diethyl phenylmalonate                        | 25.06 | 24.80 | 0.26  |
| Diethyl phosphite                             | 12.66 | 12.64 | 0.02  |
| Diethyl phthalate                             | 23.07 | 23.05 | 0.02  |
| Diethyl propoxy phosphorus                    | 18.04 | 18.09 | -0.05 |
| Diethyl propylmalonate                        | 20.50 | 20.57 | -0.07 |
| Diethyl succinate                             | 16.80 | 16.92 | -0.12 |
| Diethyl sulfate                               | 12.61 | 12.62 | -0.01 |
| Diethyl sulfite                               | 12.89 | 12.67 | 0.22  |
| Diethyl sulphide                              | 11.33 | 11.33 | 0.00  |
| Diethyl tartrate                              | 18.02 | 18.04 | -0.02 |
| Diethyl terephthalate                         | 23.26 | 23.05 | 0.21  |

|                                         |       |       |       |
|-----------------------------------------|-------|-------|-------|
| Diethyl thiodipropionate                | 23.29 | 23.73 | -0.44 |
| Diethyl thiophosphoryl chloride         | 17.32 | 17.43 | -0.11 |
| Diethyl xanthate                        | 17.14 | 17.21 | -0.07 |
| Diethylacetaldehyde                     | 11.94 | 12.05 | -0.11 |
| Diethylacetamide                        | 13.11 | 13.35 | -0.24 |
| Diethylamine                            | 9.66  | 9.53  | 0.13  |
| Diethylamino ethyl fluorophosphate      | 16.62 | 16.68 | -0.06 |
| Diethylamino ethyl fluoroethiophosphate | 19.45 | 19.63 | -0.18 |
| Diethylaminoacetone                     | 15.19 | 15.32 | -0.13 |
| Diethylbutylthiophosphine               | 24.68 | 24.81 | -0.13 |
| Diethylcarbonate                        | 11.31 | 11.30 | 0.01  |
| Diethylcyanamide                        | 11.35 | 11.28 | 0.07  |
| Diethyldifluorosilane                   | 11.00 | 11.03 | -0.03 |
| Diethyldiisothiocyanatosilane           | 23.61 | 23.51 | 0.10  |
| Diethylene glycol dimethyl ether        | 13.96 | 13.85 | 0.11  |
| Diethyleneglycol                        | 10.04 | 9.98  | 0.06  |
| Diethyleneglycol bischloroformate       | 17.85 | 17.90 | -0.05 |
| Diethyleneglycol diacetate              | 17.77 | 17.59 | 0.18  |
| Diethyleneglycol diaminopropyl ether    | 23.98 | 23.93 | 0.05  |
| Diethyleneglycol diethyl ether          | 17.64 | 17.54 | 0.10  |
| Diethyleneglycol monobutyl ether        | 17.41 | 17.43 | -0.02 |
| Diethyleneglycol-di-n-butylether        | 24.93 | 24.88 | 0.05  |
| Diethylketone                           | 10.01 | 10.13 | -0.12 |
| Diethylmethylamine                      | 11.59 | 11.56 | 0.03  |
| Diethylmethylchlorosilane               | 15.31 | 15.44 | -0.13 |
| Diethylmethylsilanol                    | 14.04 | 14.12 | -0.08 |
| Diethylnonylsilane                      | 28.38 | 28.46 | -0.08 |
| Diethyloctylsilane                      | 26.65 | 26.62 | 0.03  |
| Diethylperoxide                         | 9.84  | 9.82  | 0.02  |
| Diethylphenyl 1-isopropoxyethoxysilane  | 31.82 | 31.76 | 0.06  |
| Diethylphosphate                        | 12.84 | 12.82 | 0.02  |
| Diethylphosphine                        | 12.14 | 12.22 | -0.08 |
| Diethylphosphinic chloride              | 12.07 | 12.00 | 0.07  |
| Diethylpropylthiophosphine              | 21.05 | 21.14 | -0.09 |
| Diethylsilane                           | 12.17 | 12.20 | -0.03 |
| Diethylsilanol                          | 12.53 | 12.39 | 0.14  |
| Diethyltrisulfide                       | 17.99 | 18.10 | -0.11 |
| Difluoroacetic acid                     | 5.33  | 5.11  | 0.22  |
| Difluorodiphenylsilane                  | 23.26 | 23.17 | 0.09  |
| Difurfuryl ether                        | 18.49 | 18.65 | -0.16 |
| Diglycidyl resorcinol ether             | 22.72 | 22.70 | 0.02  |
| Diheptyl ether                          | 27.28 | 27.21 | 0.07  |

|                                         |       |       |       |
|-----------------------------------------|-------|-------|-------|
| Diheptyl ethylphosphonate               | 34.45 | 34.39 | 0.06  |
| Diheptyl isophthalate                   | 41.70 | 41.41 | 0.29  |
| Diheptyl phosphite                      | 30.99 | 30.99 | 0.00  |
| Diheptyl sulfide                        | 29.76 | 29.68 | 0.08  |
| Dihexyl carbonate                       | 26.04 | 25.98 | 0.06  |
| Dihexyl disulfide                       | 29.20 | 29.26 | -0.06 |
| Dihexyl ethylphosphonate                | 30.75 | 30.72 | 0.03  |
| Dihexyl isophthalate                    | 38.03 | 37.74 | 0.29  |
| Dihexyl maleate                         | 31.61 | 31.52 | 0.09  |
| Dihexyl phosphite                       | 27.25 | 27.32 | -0.07 |
| Dihexyl sulfide                         | 26.06 | 26.01 | 0.05  |
| Dihexyl terephthalate                   | 37.82 | 37.74 | 0.08  |
| Dihexylamine                            | 24.25 | 24.21 | 0.04  |
| Dihexylsulfate                          | 27.35 | 27.30 | 0.05  |
| Dihydro-2(3H)-thiophenone               | 10.48 | 10.62 | -0.14 |
| Dihydro-3-methyl-2(3H)-furanone         | 9.75  | 9.85  | -0.10 |
| Dihydro-3-methylene-2(3H)-furanone      | 9.59  | 9.78  | -0.19 |
| Dihydro-4-methyl-2(3H)-furanone         | 9.77  | 9.85  | -0.08 |
| Dihydrocarvone                          | 18.22 | 18.33 | -0.11 |
| Dihydrolinalool                         | 19.40 | 19.69 | -0.29 |
| Dihdropinene                            | 17.74 | 17.45 | 0.29  |
| Diisoamyl ether                         | 19.92 | 19.84 | 0.08  |
| Diisoamyl phthalate                     | 34.23 | 34.03 | 0.20  |
| Diisoamylbutylthioborane                | 31.71 | 31.67 | 0.04  |
| Diisobutoxythiophosphonate              | 22.54 | 22.57 | -0.03 |
| Diisobutyl adipate                      | 27.73 | 27.90 | -0.17 |
| Diisobutyl carbonate                    | 18.61 | 18.61 | 0.00  |
| Diisobutylamine                         | 16.98 | 16.84 | 0.14  |
| Diisobutylboronic anhydride             | 34.78 | 34.50 | 0.28  |
| Diisobutylbutylthioborane               | 28.17 | 28.00 | 0.17  |
| Diisobutylene                           | 15.37 | 15.43 | -0.06 |
| Diisobutylphosphinic chloride           | 19.32 | 19.30 | 0.02  |
| Diisobutylsulfite                       | 20.04 | 19.98 | 0.06  |
| Diisopentyl sulfide                     | 22.40 | 22.31 | 0.09  |
| Diisopentylamine                        | 20.72 | 20.51 | 0.21  |
| Diisopentylboronic anhydride            | 41.84 | 41.84 | 0.00  |
| Diisopropoxyphosphinylsulfenyl chloride | 21.40 | 21.43 | -0.03 |
| Diisopropyl adipate                     | 24.38 | 24.27 | 0.11  |
| Diisopropyl disulfide                   | 18.31 | 18.24 | 0.07  |
| Diisopropyl ether                       | 12.61 | 12.54 | 0.07  |
| Diisopropyl oxalate                     | 17.07 | 16.93 | 0.14  |
| Diisopropyl phthalate                   | 27.02 | 26.73 | 0.29  |

|                                                                       |       |       |       |
|-----------------------------------------------------------------------|-------|-------|-------|
| Diisopropyl sulfide                                                   | 15.29 | 14.99 | 0.30  |
| Diisopropylamine                                                      | 13.37 | 13.14 | 0.23  |
| Diisopropylboronic anhydride                                          | 27.26 | 27.25 | 0.01  |
| Diisopropylphosphinic chloride                                        | 15.59 | 15.72 | -0.13 |
| Dill-Apiole                                                           | 23.48 | 23.56 | -0.08 |
| Dimethoxane                                                           | 16.78 | 16.59 | 0.19  |
| Dimethoxydiphenylsilane                                               | 28.42 | 28.33 | 0.09  |
| Dimethoxymethane                                                      | 7.58  | 7.58  | 0.00  |
| Dimethyl 1,3-acetonedicarboxylate                                     | 15.46 | 15.17 | 0.29  |
| Dimethyl 2-butyndioate                                                | 12.93 | 12.63 | 0.30  |
| Dimethyl 2-methylsuccinate                                            | 14.93 | 15.04 | -0.11 |
| Dimethyl 3-oxo-2-butyl phosphate                                      | 16.58 | 16.76 | -0.18 |
| Dimethyl azelate                                                      | 22.27 | 22.40 | -0.13 |
| Dimethyl bis(2,2-diethylhydrazino)silane                              | 28.36 | 28.44 | -0.08 |
| Dimethyl bis(2,2-dimethylhydrazino)silane                             | 21.22 | 21.16 | 0.06  |
| Dimethyl bis(2-chloropropoxy)silane                                   | 23.72 | 23.71 | 0.01  |
| Dimethyl butyl isopropylammonium<br>bis(trifluoromethylsulfonyl)amide | 31.24 | 31.34 | -0.10 |
| Dimethyl carbate                                                      | 20.53 | 20.56 | -0.03 |
| Dimethyl carbonate                                                    | 7.57  | 7.60  | -0.03 |
| Dimethyl chlorothiophosphate                                          | 13.72 | 13.74 | -0.02 |
| Dimethyl citraconate                                                  | 15.03 | 15.01 | 0.02  |
| Dimethyl cyclobutane-1,1-dicarboxylate                                | 16.13 | 16.04 | 0.09  |
| Dimethyl dipropylmalonate                                             | 22.23 | 22.39 | -0.16 |
| Dimethyl disulfide                                                    | 10.84 | 10.74 | 0.10  |
| Dimethyl ethylphosphonate                                             | 12.37 | 12.34 | 0.03  |
| Dimethyl glutarate                                                    | 14.90 | 15.06 | -0.16 |
| Dimethyl hexanedioate                                                 | 16.77 | 16.89 | -0.12 |
| Dimethyl hexyl isopropylammonium<br>bis(trifluoromethylsulfonyl)amide | 35.34 | 35.01 | 0.33  |
| Dimethyl isophthalate                                                 | 19.50 | 19.36 | 0.14  |
| Dimethyl itaconate                                                    | 14.86 | 14.96 | -0.10 |
| Dimethyl maleate                                                      | 13.01 | 13.14 | -0.13 |
| Dimethyl malonate                                                     | 11.31 | 11.39 | -0.08 |
| Dimethyl methylmalonate                                               | 13.15 | 13.21 | -0.06 |
| Dimethyl oxalate                                                      | 9.23  | 9.55  | -0.32 |
| Dimethyl phosphite                                                    | 8.88  | 8.94  | -0.06 |
| Dimethyl phthalate                                                    | 19.46 | 19.36 | 0.10  |
| Dimethyl sebacate                                                     | 24.13 | 24.24 | -0.11 |
| Dimethyl suberate                                                     | 20.44 | 20.57 | -0.13 |
| Dimethyl succinate                                                    | 13.09 | 13.22 | -0.13 |
| Dimethyl sulfate                                                      | 8.84  | 8.92  | -0.08 |

|                                                                      |       |       |       |
|----------------------------------------------------------------------|-------|-------|-------|
| Dimethyl sulfide                                                     | 7.71  | 7.49  | 0.22  |
| Dimethyl sulfite                                                     | 8.88  | 8.98  | -0.10 |
| Dimethyl sulfone                                                     | 8.11  | 7.82  | 0.29  |
| Dimethyl thiodipropionate                                            | 19.88 | 20.03 | -0.15 |
| Dimethylacetal                                                       | 9.43  | 9.44  | -0.01 |
| Dimethylacetamide                                                    | 9.60  | 9.71  | -0.11 |
| Dimethylamine                                                        | 5.65  | 5.89  | -0.24 |
| Dimethylaminoacetaldehyde diethylacetal                              | 18.00 | 18.35 | -0.35 |
| Dimethylcyanamide                                                    | 7.82  | 7.64  | 0.18  |
| Dimethyldi(2-ethylbutoxy)silane                                      | 31.03 | 30.92 | 0.11  |
| Dimethyldi(2-octyloxy)silane                                         | 38.23 | 38.30 | -0.07 |
| Dimethyldi-2-butoxysilane                                            | 23.66 | 23.62 | 0.04  |
| Dimethyldi-2-pentoxysilane                                           | 27.20 | 27.29 | -0.09 |
| Dimethyldiacetoxysilane                                              | 16.18 | 16.18 | 0.00  |
| Dimethyldibutoxysilane                                               | 23.64 | 23.61 | 0.03  |
| Dimethyldidodecyloxysilane                                           | 52.89 | 52.97 | -0.08 |
| Dimethyldiheptoxysilane                                              | 34.59 | 34.62 | -0.03 |
| Dimethyldihexoxysilane                                               | 30.71 | 30.95 | -0.24 |
| Dimethyldiisopropoxysilane                                           | 19.63 | 19.95 | -0.32 |
| Dimethyldiisothiocyanatosilane                                       | 19.79 | 19.89 | -0.10 |
| Dimethyldimethoxysilane                                              | 12.49 | 12.57 | -0.08 |
| Dimethyldinonyloxysilane                                             | 41.89 | 41.96 | -0.07 |
| Dimethyldioctoxysilane                                               | 38.25 | 38.29 | -0.04 |
| Dimethyldipentoxysilane                                              | 27.11 | 27.28 | -0.17 |
| Dimethyldiphenoxysilane                                              | 28.37 | 28.30 | 0.07  |
| Dimethyldiphenylsilane                                               | 27.76 | 27.78 | -0.02 |
| Dimethyldipropoxysilane                                              | 20.19 | 19.94 | 0.25  |
| Dimethylether                                                        | 5.08  | 5.17  | -0.09 |
| Dimethylethylsilanol                                                 | 12.21 | 12.30 | -0.09 |
| Dimethylketazine                                                     | 14.28 | 14.29 | -0.01 |
| Dimethylperoxide                                                     | 6.10  | 6.13  | -0.03 |
| Dimethylphenylsilane                                                 | 17.85 | 18.06 | -0.21 |
| Dimethylphosphate                                                    | 9.32  | 9.13  | 0.19  |
| Dimethylphosphinic acid ethylester                                   | 12.12 | 12.22 | -0.10 |
| Dimethylpropylamine                                                  | 11.35 | 11.57 | -0.22 |
| Dimethylpropylisopropylammonium<br>bis(trifluoromethylsulfonyl)amide | 29.16 | 29.50 | -0.34 |
| Dimethyltrisulfide                                                   | 14.27 | 14.26 | 0.01  |
| Dimethylvinylethoxysilane                                            | 15.78 | 15.80 | -0.02 |
| Di-n-butylsulfite                                                    | 20.02 | 20.01 | 0.01  |
| Di-n-hexylether                                                      | 23.57 | 23.54 | 0.03  |
| Di-n-octylether                                                      | 30.96 | 30.88 | 0.08  |

|                                      |       |       |       |
|--------------------------------------|-------|-------|-------|
| Dinonyl ether                        | 34.59 | 34.55 | 0.04  |
| Dinonyl isophthalate                 | 48.94 | 48.75 | 0.19  |
| Dinonyldiphenylsilane                | 57.28 | 57.10 | 0.18  |
| DINP                                 | 48.93 | 48.72 | 0.21  |
| Di-n-propylmaleate                   | 20.56 | 20.51 | 0.05  |
| Di-n-propylsulfate                   | 16.30 | 16.29 | 0.01  |
| Di-n-propylsulfone                   | 15.44 | 15.33 | 0.11  |
| Diethyl butoxyborine                 | 39.65 | 39.95 | -0.30 |
| Diethyl ethylphosphonate             | 38.13 | 38.06 | 0.07  |
| Diethyl isophthalate                 | 45.16 | 45.08 | 0.08  |
| Diethyl maleate                      | 38.88 | 38.86 | 0.02  |
| Diethyl phosphite                    | 34.63 | 34.66 | -0.03 |
| Diethyl sulfide                      | 33.40 | 33.35 | 0.05  |
| Diethyl terephthalate                | 45.28 | 45.08 | 0.20  |
| Diethylamine                         | 31.77 | 31.55 | 0.22  |
| Dipentyl carbonate                   | 22.27 | 22.31 | -0.04 |
| Dipentyl ethylphosphonate            | 27.06 | 27.05 | 0.01  |
| Dipentyl phosphite                   | 23.59 | 23.65 | -0.06 |
| Dipentyl sulfide                     | 22.35 | 22.34 | 0.01  |
| Diphenyl 2-ethylhexyl phosphate      | 39.42 | 39.49 | -0.07 |
| Diphenyl ether                       | 21.03 | 21.02 | 0.01  |
| Diphenyl fluorophosphate             | 23.90 | 24.22 | -0.32 |
| Diphenyl phosphonate                 | 24.45 | 24.47 | -0.02 |
| Diphenyl sulfide                     | 23.69 | 23.56 | 0.13  |
| Diphenylacetaldehyde                 | 23.80 | 24.18 | -0.38 |
| Diphenylketene                       | 24.19 | 24.03 | 0.16  |
| Diphenylmethane                      | 22.02 | 22.15 | -0.13 |
| Diphenylmethylaniline                | 23.26 | 23.49 | -0.23 |
| Diphenylmethylsilane                 | 25.88 | 25.94 | -0.06 |
| Diphenylmethylsilylamine             | 26.97 | 26.98 | -0.01 |
| Diphenylnonylsilane                  | 40.55 | 40.60 | -0.05 |
| Diphenylphosphinic chloride          | 23.57 | 23.70 | -0.13 |
| Diphenylphosphorous aziridide        | 29.14 | 29.25 | -0.11 |
| Diphenylsilane                       | 24.39 | 24.34 | 0.05  |
| Diphenylthiophosphoric aziride       | 31.52 | 31.46 | 0.06  |
| Dipropoxy butyl phosphorus           | 23.83 | 23.76 | 0.07  |
| Dipropoxy propyl phosphorus          | 21.73 | 21.92 | -0.19 |
| Dipropoxymethane                     | 15.02 | 14.95 | 0.07  |
| Dipropoxyphosphinylsulfenyl chloride | 21.40 | 21.42 | -0.02 |
| Dipropoxythiophosphonate             | 19.19 | 18.93 | 0.26  |
| Dipropyl adipate                     | 24.16 | 24.26 | -0.10 |
| Dipropyl azodicarboxylate            | 19.40 | 19.42 | -0.02 |

|                                     |       |       |       |
|-------------------------------------|-------|-------|-------|
| Dipropyl butylphosphonate           | 23.55 | 23.38 | 0.17  |
| Dipropyl carbonate                  | 14.92 | 14.97 | -0.05 |
| Dipropyl disulfide                  | 18.19 | 18.25 | -0.06 |
| Dipropyl ether                      | 12.59 | 12.53 | 0.06  |
| Dipropyl ethylphosphonate           | 19.72 | 19.71 | 0.01  |
| Dipropyl fumarate                   | 20.80 | 20.51 | 0.29  |
| Dipropyl heptylphosphonate          | 29.08 | 28.88 | 0.20  |
| Dipropyl hexylphosphonate           | 27.23 | 27.05 | 0.18  |
| Dipropyl isophthalate               | 27.09 | 26.73 | 0.36  |
| Dipropyl octylphosphonate           | 30.91 | 30.72 | 0.19  |
| Dipropyl O-propyl phosphorus oxide  | 21.20 | 21.29 | -0.09 |
| Dipropyl oxalate                    | 17.00 | 16.92 | 0.08  |
| Dipropyl pentylphosphonate          | 25.39 | 25.21 | 0.18  |
| Dipropyl phosphite                  | 16.25 | 16.31 | -0.06 |
| Dipropyl propylphosphonate          | 21.76 | 21.54 | 0.22  |
| Dipropyl succinate                  | 20.46 | 20.59 | -0.13 |
| Dipropyl sulfide                    | 15.44 | 15.00 | 0.44  |
| Dipropyl terephthalate              | 27.02 | 26.73 | 0.29  |
| Dipropylacetamide                   | 16.70 | 17.02 | -0.32 |
| Dipropylamine                       | 13.29 | 13.20 | 0.09  |
| Dipropylbutylthioborane             | 24.38 | 24.36 | 0.02  |
| Dipropyldifluorosilane              | 14.76 | 14.70 | 0.06  |
| Dipropylene glycol monomethyl ether | 15.62 | 15.59 | 0.03  |
| Dipropylethylthioborane             | 20.80 | 20.69 | 0.11  |
| Dipropylisobutylaminoborane         | 22.19 | 22.23 | -0.04 |
| Dipropylperoxide                    | 13.49 | 13.49 | 0.00  |
| Dipropylphenylaminoborane           | 25.10 | 25.10 | 0.00  |
| Dipropylphenylthioborane            | 26.82 | 26.78 | 0.04  |
| Dipropylphosphinic chloride         | 15.54 | 15.67 | -0.13 |
| Dipropylsilane                      | 15.89 | 15.87 | 0.02  |
| Dipropylsulfoxide                   | 15.27 | 15.35 | -0.08 |
| Di-s-butylamine                     | 17.07 | 16.81 | 0.26  |
| Di-s-butylsulfide                   | 18.69 | 18.66 | 0.03  |
| Disilanomethane                     | 10.77 | 10.81 | -0.04 |
| Di-t-amyl disulfide                 | 25.71 | 25.88 | -0.17 |
| Di-t-amyl peroxide                  | 20.83 | 20.80 | 0.03  |
| Di-t-butyl ether                    | 16.16 | 16.16 | 0.00  |
| Di-t-butyl disulfide                | 22.15 | 22.21 | -0.06 |
| Di-t-butylsulfide                   | 19.14 | 18.96 | 0.18  |
| Di-t-butyltetrasulfide              | 29.33 | 29.25 | 0.08  |
| Di-t-butyltrisulfide                | 25.66 | 25.73 | -0.07 |
| Divinyl ether                       | 8.69  | 8.30  | 0.39  |



|                                            |       |       |       |
|--------------------------------------------|-------|-------|-------|
| Divinyl sulfide                            | 10.90 | 10.60 | 0.30  |
| Divinyl sulfone                            | 11.23 | 11.02 | 0.21  |
| DMSO                                       | 8.00  | 7.84  | 0.16  |
| Docosane                                   | 41.29 | 41.23 | 0.06  |
| Dodecahydrosqualene                        | 55.83 | 55.81 | 0.02  |
| Dodecamethylcyclohexasiloxane              | 44.35 | 44.36 | -0.01 |
| Dodecamethylpentasiloxane                  | 41.54 | 41.58 | -0.04 |
| Dodecane                                   | 22.84 | 22.87 | -0.03 |
| Dodecanedioic acid                         | 24.09 | 24.14 | -0.05 |
| Dodecanoic anhydride                       | 45.84 | 45.61 | 0.23  |
| Dodecanoyl chloride                        | 25.21 | 25.04 | 0.17  |
| Dodecyl acetate                            | 27.13 | 27.24 | -0.11 |
| Dodecyl thiocyanate                        | 27.86 | 27.83 | 0.03  |
| Dodecylcyclohexane                         | 33.08 | 33.02 | 0.06  |
| Dodecyloxirane                             | 26.30 | 26.37 | -0.07 |
| DTBP                                       | 17.22 | 17.12 | 0.10  |
| d-Verbenone                                | 17.53 | 17.52 | 0.01  |
| E-beta-Caryophyllene                       | 26.19 | 26.50 | -0.31 |
| Eicosamethylnonasiloxane                   | 71.07 | 71.15 | -0.08 |
| Eicosane                                   | 37.62 | 37.55 | 0.07  |
| Elaidic acid                               | 34.45 | 34.44 | 0.01  |
| Enanthic acid                              | 14.22 | 14.33 | -0.11 |
| Entprol                                    | 31.85 | 31.82 | 0.03  |
| Epichlorohydrin                            | 8.11  | 8.08  | 0.03  |
| Eps-Chlorocapronitrile                     | 13.69 | 13.68 | 0.01  |
| Ethane                                     | 4.47  | 4.52  | -0.05 |
| Ethanediol diacetate                       | 13.16 | 13.25 | -0.09 |
| Ethanesulfonic acid                        | 8.51  | 8.73  | -0.22 |
| Ethanesulfonylchloride                     | 10.15 | 10.01 | 0.14  |
| Ethanethioic acid S-(1-methylheptyl) ester | 22.60 | 22.47 | 0.13  |
| Ethanol                                    | 5.12  | 5.08  | 0.04  |
| Ethene                                     | 4.36  | 4.35  | 0.01  |
| Ethoglucid                                 | 25.28 | 25.20 | 0.08  |
| Ethoheptazine                              | 30.39 | 30.30 | 0.09  |
| Ethoxyacetaldehyde                         | 8.90  | 9.07  | -0.17 |
| Ethoxyacetic acid                          | 9.47  | 9.49  | -0.02 |
| Ethoxyacetylchloride                       | 11.02 | 11.02 | 0.00  |
| Ethoxyacetylene                            | 8.15  | 8.09  | 0.06  |
| Ethoxybenzene                              | 14.95 | 14.94 | 0.01  |
| Ethoxydichloromethylsulfenyl chloride      | 16.22 | 16.18 | 0.04  |
| Ethoxytriethylsilane                       | 19.46 | 19.57 | -0.11 |
| Ethoxytrihexylsilane                       | 41.85 | 41.60 | 0.25  |

|                                      |       |       |       |
|--------------------------------------|-------|-------|-------|
| Ethoxytrimethylsilane                | 14.14 | 14.14 | 0.00  |
| Ethyl (4-methoxyphenyl)acetate       | 20.91 | 21.20 | -0.29 |
| Ethyl (E)-3-chloro-2-butenolate      | 14.69 | 14.42 | 0.27  |
| Ethyl (Z)-3-chloro-2-butenolate      | 14.64 | 14.42 | 0.22  |
| Ethyl 10-undecenoate                 | 25.37 | 25.28 | 0.09  |
| Ethyl 1-naphthaleneacetate           | 25.58 | 25.74 | -0.16 |
| Ethyl 1-Naphthoate                   | 23.97 | 23.90 | 0.07  |
| Ethyl 1-piperidinepropanoate         | 20.60 | 20.56 | 0.04  |
| Ethyl 2-(methoxyethyl)acetoacetate   | 18.90 | 18.81 | 0.09  |
| Ethyl 2,3-dibromopropionate          | 16.89 | 16.87 | 0.02  |
| Ethyl 2,3-dichloropropionate         | 14.64 | 14.51 | 0.13  |
| Ethyl 2,4-dibromobutanoate           | 18.67 | 18.71 | -0.04 |
| Ethyl 2-acetyl-3-methylbutanoate     | 18.12 | 18.14 | -0.02 |
| Ethyl 2-acetyl-4-pentenoate          | 17.92 | 18.03 | -0.11 |
| Ethyl 2-acetylhexanoate              | 20.03 | 19.99 | 0.04  |
| Ethyl 2-acetylpentanoate             | 18.09 | 18.15 | -0.06 |
| Ethyl 2-aminoacetate                 | 10.16 | 10.24 | -0.08 |
| Ethyl 2-bromo-2-methylpropanoate     | 15.50 | 15.69 | -0.19 |
| Ethyl 2-bromo-3-methylbutyrate       | 17.44 | 17.46 | -0.02 |
| Ethyl 2-bromoacrylate                | 13.48 | 13.53 | -0.05 |
| Ethyl 2-bromobutyrate                | 15.58 | 15.64 | -0.06 |
| Ethyl 2-bromopropionate              | 13.62 | 13.81 | -0.19 |
| Ethyl 2-butynoate                    | 12.08 | 11.96 | 0.12  |
| Ethyl 2-chlorobutanoate              | 14.16 | 14.44 | -0.28 |
| Ethyl 2-chloropropionate             | 12.64 | 12.61 | 0.03  |
| Ethyl 2-cyano-2-phenylacetate        | 20.26 | 20.36 | -0.10 |
| Ethyl 2-cyclopentanone-1-carboxylate | 15.49 | 15.47 | 0.02  |
| Ethyl 2-ethylacetoacetate            | 16.17 | 16.32 | -0.15 |
| Ethyl 2-ethylcaproate                | 19.80 | 19.88 | -0.08 |
| Ethyl 2-furancarboxylate             | 14.12 | 13.78 | 0.34  |
| Ethyl 2-hydroxy-3-butenolate         | 12.88 | 12.99 | -0.11 |
| Ethyl 2-methoxybenzoate              | 19.60 | 19.37 | 0.23  |
| Ethyl 2-methylacetoacetate           | 14.50 | 14.48 | 0.02  |
| Ethyl 2-methylbenzoate               | 18.76 | 18.69 | 0.07  |
| Ethyl 2-naphthaleneacetate           | 25.70 | 25.74 | -0.04 |
| Ethyl 2-naphthoate                   | 24.19 | 23.90 | 0.29  |
| Ethyl 2-picolinate                   | 16.02 | 15.94 | 0.08  |
| Ethyl 2-thiophenecarboxylate         | 16.32 | 16.18 | 0.14  |
| Ethyl 3,5-dinitrobenzoate            | 22.11 | 22.07 | 0.04  |
| Ethyl 3-aminobenzoate                | 18.08 | 18.40 | -0.32 |
| Ethyl 3-bromopropionate              | 13.70 | 13.79 | -0.09 |
| Ethyl 3-butenolate                   | 12.30 | 12.43 | -0.13 |

|                                        |       |       |       |
|----------------------------------------|-------|-------|-------|
| Ethyl 3-chlorobutanoate                | 14.13 | 14.44 | -0.31 |
| Ethyl 3-chloropropionate               | 12.50 | 12.62 | -0.12 |
| Ethyl 3-cyclohexene-1-carboxylate      | 17.21 | 17.12 | 0.09  |
| Ethyl 3-ethoxypropionate               | 15.02 | 15.06 | -0.04 |
| Ethyl 3-hydroxybutyrate                | 12.99 | 13.12 | -0.13 |
| Ethyl 3-methyl-2-butenolate            | 14.40 | 14.34 | 0.06  |
| Ethyl 3-oxopentanoate                  | 14.38 | 14.50 | -0.12 |
| Ethyl 4-bromoacetoacetate              | 15.61 | 15.73 | -0.12 |
| Ethyl 4-bromobenzoate                  | 19.99 | 19.79 | 0.20  |
| Ethyl 4-bromobutyrate                  | 15.52 | 15.62 | -0.10 |
| Ethyl 4-chloroacetoacetate             | 14.45 | 14.56 | -0.11 |
| Ethyl 4-chlorobutyrate                 | 14.37 | 14.46 | -0.09 |
| Ethyl 4-fluorobenzoate                 | 16.71 | 16.74 | -0.03 |
| Ethyl 4-methoxybenzoate                | 19.84 | 19.37 | 0.47  |
| Ethyl 4-methyl-3-oxopentanoate         | 16.36 | 16.32 | 0.04  |
| Ethyl 4-methylbenzoate                 | 18.92 | 18.69 | 0.23  |
| Ethyl 4-methylcaproate                 | 17.66 | 18.04 | -0.38 |
| Ethyl 4-methylpentanoate               | 16.10 | 16.21 | -0.11 |
| Ethyl 4-pyridinecarboxylate            | 15.94 | 15.87 | 0.07  |
| Ethyl 5-bromovalerate                  | 17.16 | 17.46 | -0.30 |
| Ethyl 5-oxohexanoate                   | 16.30 | 16.33 | -0.03 |
| Ethyl 6-bromohexanoate                 | 19.44 | 19.29 | 0.15  |
| Ethyl acetate                          | 8.82  | 8.88  | -0.06 |
| Ethyl acetoacetate                     | 12.51 | 12.66 | -0.15 |
| Ethyl acrylate                         | 10.58 | 10.60 | -0.02 |
| Ethyl amyl ether                       | 14.41 | 14.37 | 0.04  |
| Ethyl benzoate                         | 16.83 | 16.78 | 0.05  |
| Ethyl bis(2,2-diethylhydrazino)silane  | 28.45 | 28.50 | -0.05 |
| Ethyl bis(2,2-dimethylhydrazino)silane | 21.27 | 21.22 | 0.05  |
| Ethyl bis(2-chloropropoxy)silane       | 23.68 | 23.80 | -0.12 |
| Ethyl bis(diethylamino)silane          | 25.47 | 25.48 | -0.01 |
| Ethyl bis(N,N-diethylamino) phosphate  | 25.37 | 25.40 | -0.03 |
| Ethyl bis(N,N-dimethylamino) phosphate | 18.06 | 18.12 | -0.06 |
| Ethyl bromoacetate                     | 11.81 | 11.95 | -0.14 |
| Ethyl but-3-yne- 1-carboxylate         | 13.50 | 13.58 | -0.08 |
| Ethyl butanoate                        | 12.49 | 12.55 | -0.06 |
| Ethyl butylxanthate                    | 21.27 | 20.88 | 0.39  |
| Ethyl caprylate                        | 19.86 | 19.90 | -0.04 |
| Ethyl chlorofluoroacetate              | 10.85 | 10.83 | 0.02  |
| Ethyl chlorofluorophosphate            | 10.08 | 10.05 | 0.03  |
| Ethyl chloroformate                    | 9.13  | 9.04  | 0.09  |
| Ethyl chlorohydroxyacetate             | 11.33 | 11.39 | -0.06 |

|                                      |       |       |       |
|--------------------------------------|-------|-------|-------|
| Ethyl crotonate                      | 12.59 | 12.47 | 0.12  |
| Ethyl cyanoacetate                   | 10.60 | 10.64 | -0.04 |
| Ethyl cyanoformate                   | 9.11  | 8.80  | 0.31  |
| Ethyl cyclohexylacetate              | 19.05 | 19.03 | 0.02  |
| Ethyl cyclopropanecarboxylate        | 11.89 | 11.69 | 0.20  |
| Ethyl decanoate                      | 23.50 | 23.57 | -0.07 |
| Ethyl diacetylacetate                | 17.21 | 16.78 | 0.43  |
| Ethyl dibromoacetate                 | 15.14 | 14.94 | 0.20  |
| Ethyl dichloroacetate                | 12.75 | 12.71 | 0.04  |
| Ethyl diethoxyacetate                | 17.57 | 17.50 | 0.07  |
| Ethyl diethylmalonate                | 22.69 | 22.42 | 0.27  |
| Ethyl dodecanoate                    | 27.20 | 27.24 | -0.04 |
| Ethyl elaidate                       | 38.03 | 38.17 | -0.14 |
| Ethyl ethanethiolsulfinate           | 15.15 | 15.23 | -0.08 |
| Ethyl ether                          | 8.92  | 8.86  | 0.06  |
| Ethyl ethoxyacetate                  | 13.20 | 13.22 | -0.02 |
| Ethyl ethylcarbamate                 | 12.01 | 12.01 | 0.00  |
| Ethyl fluoroacetate                  | 8.83  | 8.85  | -0.02 |
| Ethyl fluorophosphoric acid          | 8.70  | 8.54  | 0.16  |
| Ethyl formate                        | 7.06  | 7.10  | -0.04 |
| Ethyl glycolate                      | 9.40  | 9.44  | -0.04 |
| Ethyl heptafluorobutanoate           | 12.92 | 12.97 | -0.05 |
| Ethyl heptanoate                     | 17.63 | 18.06 | -0.43 |
| Ethyl hexadecanoate                  | 34.29 | 34.58 | -0.29 |
| Ethyl hexanoate                      | 16.13 | 16.22 | -0.09 |
| Ethyl hexyl carbonate                | 18.62 | 18.64 | -0.02 |
| Ethyl hydrocinnamate                 | 20.32 | 20.45 | -0.13 |
| Ethyl hydrogen succinate             | 13.12 | 13.19 | -0.07 |
| Ethyl hydroperoxide                  | 6.11  | 6.00  | 0.11  |
| Ethyl hydrosorbate                   | 16.11 | 16.15 | -0.04 |
| Ethyl iodide                         | 9.60  | 9.62  | -0.02 |
| Ethyl iodoacetate                    | 13.91 | 13.99 | -0.08 |
| Ethyl isobutanoate                   | 12.49 | 12.54 | -0.05 |
| Ethyl isobutyl 2-chloropropoxysilane | 23.48 | 23.41 | 0.07  |
| Ethyl isocrotonate                   | 12.58 | 12.47 | 0.11  |
| Ethyl isocyanate                     | 7.24  | 7.33  | -0.09 |
| Ethyl isonitrile                     | 6.54  | 6.47  | 0.07  |
| Ethyl isothiocyanate                 | 10.39 | 10.32 | 0.07  |
| Ethyl isovalerate                    | 14.33 | 14.37 | -0.04 |
| Ethyl lactate                        | 11.29 | 11.28 | 0.01  |
| Ethyl levulinate                     | 14.39 | 14.50 | -0.11 |
| Ethyl linolenate                     | 37.96 | 38.01 | -0.05 |

|                                               |       |       |       |
|-----------------------------------------------|-------|-------|-------|
| Ethyl mercaptan                               | 7.67  | 7.56  | 0.11  |
| Ethyl mercaptoacetate                         | 11.86 | 11.92 | -0.06 |
| Ethyl methacrylate                            | 12.40 | 12.46 | -0.06 |
| Ethyl methyl carbonate                        | 9.40  | 9.45  | -0.05 |
| Ethyl methyl disulfide                        | 12.90 | 12.66 | 0.24  |
| Ethyl methyl ketone oxime                     | 9.88  | 9.90  | -0.02 |
| Ethyl methyl sulfide                          | 9.45  | 9.41  | 0.04  |
| Ethyl myristate                               | 31.01 | 30.91 | 0.10  |
| Ethyl N,N-diethylamino phosphorusoxy chloride | 18.33 | 18.32 | 0.01  |
| Ethyl N-butylcarbamate                        | 15.69 | 15.68 | 0.01  |
| Ethyl nicotinate                              | 15.99 | 15.87 | 0.12  |
| Ethyl nitroacetate                            | 11.29 | 11.16 | 0.13  |
| Ethyl N-methylcarbamate                       | 10.19 | 10.19 | 0.00  |
| Ethyl nonanoate                               | 21.68 | 21.73 | -0.05 |
| Ethyl N-phenylcarbamate                       | 18.50 | 18.48 | 0.02  |
| Ethyl N-phenylformimide                       | 18.12 | 17.78 | 0.34  |
| Ethyl oleate                                  | 38.05 | 38.17 | -0.12 |
| Ethyl orthoformate                            | 15.71 | 15.71 | 0.00  |
| Ethyl pentanoate                              | 14.64 | 14.39 | 0.25  |
| Ethyl pentyl carbonate                        | 16.78 | 16.80 | -0.02 |
| Ethyl phenoxyacetate                          | 19.43 | 19.31 | 0.12  |
| Ethyl phenyl butoxyborine                     | 24.22 | 24.20 | 0.02  |
| Ethyl phenyl fluorophosphate                  | 18.23 | 18.31 | -0.08 |
| Ethyl phenylacetate                           | 18.46 | 18.62 | -0.16 |
| Ethyl phenylglyoxylate                        | 19.10 | 18.73 | 0.37  |
| Ethyl pivalate                                | 14.31 | 14.38 | -0.07 |
| Ethyl propanoate                              | 10.70 | 10.72 | -0.02 |
| Ethyl propiolate                              | 10.00 | 9.91  | 0.09  |
| Ethyl propyl carbonate                        | 13.09 | 13.13 | -0.04 |
| Ethyl propyl fluorophosphate                  | 14.13 | 14.23 | -0.10 |
| Ethyl propyl sulfide                          | 13.16 | 13.16 | 0.00  |
| Ethyl pyruvate                                | 10.65 | 10.83 | -0.18 |
| Ethyl ricinoleate                             | 38.75 | 38.73 | 0.02  |
| Ethyl salicylate                              | 17.95 | 17.49 | 0.46  |
| Ethyl t-butyl ether                           | 12.62 | 12.51 | 0.11  |
| Ethyl t-butyl ketone                          | 13.70 | 13.79 | -0.09 |
| Ethyl thiocyanate                             | 9.54  | 9.47  | 0.07  |
| Ethyl trans-2-methyl-2-butenolate             | 14.38 | 14.34 | 0.04  |
| Ethyl tribromoacetate                         | 18.22 | 18.37 | -0.15 |
| Ethyl trichloroacetate                        | 14.75 | 14.72 | 0.03  |
| Ethyl trifluoroacetate                        | 9.04  | 8.99  | 0.05  |
| Ethyl tris(2,2-diethylhydrazino)silane        | 38.42 | 38.38 | 0.04  |

|                                          |       |       |       |
|------------------------------------------|-------|-------|-------|
| Ethyl undecanoate                        | 25.35 | 25.40 | -0.05 |
| Ethyl vinyl ether                        | 8.66  | 8.58  | 0.08  |
| Ethylacetamide                           | 9.55  | 9.53  | 0.02  |
| Ethylamine                               | 5.92  | 5.88  | 0.04  |
| Ethylaminotriethylsilane                 | 20.40 | 20.36 | 0.04  |
| Ethylammonium nitrate                    | 9.57  | 9.56  | 0.01  |
| Ethylbenzene                             | 14.25 | 14.25 | 0.00  |
| Ethylbenzene sulfonate                   | 18.09 | 18.12 | -0.03 |
| Ethylcyclobutane                         | 11.15 | 11.00 | 0.15  |
| Ethylcyclohexane                         | 14.67 | 14.67 | 0.00  |
| Ethylcyclohexyldifluorosilane            | 17.56 | 17.54 | 0.02  |
| Ethylcyclopentane                        | 12.84 | 12.83 | 0.01  |
| Ethylcyclopropane                        | 9.45  | 9.16  | 0.29  |
| Ethyl dibutoxysilane                     | 23.64 | 23.69 | -0.05 |
| Ethyl diisopropylamin                    | 17.25 | 16.99 | 0.26  |
| Ethyl dimethyl 1-(3-pentoxo)ethoxysilane | 25.72 | 25.74 | -0.02 |
| Ethyl dimethylamine                      | 9.73  | 9.74  | -0.01 |
| Ethylene glycol diformate                | 9.69  | 9.68  | 0.01  |
| Ethylene glycol dimethacrylate           | 20.18 | 20.40 | -0.22 |
| Ethylene glycol monostearate             | 38.40 | 38.81 | -0.41 |
| Ethylene glycol monosulfite              | 7.94  | 8.15  | -0.21 |
| Ethylenediamine                          | 7.22  | 7.24  | -0.02 |
| Ethylenedichloride                       | 8.34  | 8.32  | 0.02  |
| Ethylepoxide                             | 8.07  | 8.02  | 0.05  |
| Ethylidenecyclohexane                    | 14.60 | 14.63 | -0.03 |
| Ethyl iodoacetylene                      | 12.57 | 12.44 | 0.13  |
| Ethyl-isoamylketone                      | 15.52 | 15.62 | -0.10 |
| Ethylisobutylsilanol                     | 16.01 | 16.04 | -0.03 |
| Ethylisopropylether                      | 10.97 | 10.70 | 0.27  |
| Ethylisopropylketone                     | 11.76 | 11.95 | -0.19 |
| Ethylmethylether                         | 6.93  | 7.01  | -0.08 |
| Ethyl-n-hexylether                       | 16.24 | 16.20 | 0.04  |
| Ethyl nitrate                            | 7.63  | 7.54  | 0.09  |
| Ethyl nitrite                            | 6.97  | 6.94  | 0.03  |
| Ethyl-n-propylether                      | 10.69 | 10.69 | 0.00  |
| Ethylphenylboronic acid                  | 16.70 | 16.47 | 0.23  |
| Ethylphenylboronic anhydride             | 32.73 | 32.42 | 0.31  |
| Ethylphenylchlorosilane                  | 19.60 | 19.82 | -0.22 |
| Ethylphenylphosphinic chloride           | 17.98 | 17.85 | 0.13  |
| Ethyl-phenyl-propylthiophosphine         | 27.21 | 26.99 | 0.22  |
| Ethylphosphinic dichloride               | 12.02 | 12.13 | -0.11 |
| Ethylphosphonyl difluoride               | 7.60  | 7.56  | 0.04  |

|                                |       |       |       |
|--------------------------------|-------|-------|-------|
| Ethylpropylphosphinic chloride | 13.79 | 13.83 | -0.04 |
| Ethylsulfinyl chloride         | 10.27 | 10.21 | 0.06  |
| Ethylthio dioctyl borane       | 38.86 | 39.05 | -0.19 |
| Ethylthiodiethylborane         | 16.97 | 17.02 | -0.05 |
| Ethyltributoxysilane           | 31.18 | 31.30 | -0.12 |
| Ethyltrichlorosilane           | 13.41 | 13.48 | -0.07 |
| Ethyltriethoxysilane           | 20.41 | 20.28 | 0.13  |
| Ethyltriisothiocyanatosilane   | 25.44 | 25.56 | -0.12 |
| Ethyltrimethoxysilane          | 14.67 | 14.74 | -0.07 |
| Ethyne                         | 3.33  | 3.50  | -0.17 |
| Ethynylbenzene                 | 13.81 | 13.45 | 0.36  |
| Etohexadiol                    | 16.70 | 16.64 | 0.06  |
| Eucarvone                      | 18.73 | 18.32 | 0.41  |
| Exalgin                        | 17.93 | 17.84 | 0.09  |
| Exaltol                        | 28.05 | 28.09 | -0.04 |
| exo-Dicyclopentadiene          | 16.71 | 16.43 | 0.28  |
| Farnesol                       | 28.58 | 28.78 | -0.20 |
| Fenchlorphos                   | 27.49 | 27.61 | -0.12 |
| Fenchone                       | 17.74 | 17.58 | 0.16  |
| Fichtelite                     | 32.91 | 33.07 | -0.16 |
| Fluorene                       | 21.68 | 21.45 | 0.23  |
| Fluoro-2,4,6-trimethylbenzene  | 15.99 | 16.19 | -0.20 |
| Fluoroacetone                  | 6.63  | 6.43  | 0.20  |
| Fluorobenzene                  | 10.37 | 10.47 | -0.10 |
| Fluoroethane                   | 4.43  | 4.49  | -0.06 |
| Fluoroethyldiisopropylsilane   | 18.91 | 18.98 | -0.07 |
| Fluorotributylsilane           | 26.44 | 26.28 | 0.16  |
| Fluorotriethylsilane           | 15.10 | 15.27 | -0.17 |
| Fluorotripentylsilane          | 31.83 | 31.78 | 0.05  |
| Fluorotripropylsilane          | 20.74 | 20.77 | -0.03 |
| Formaldehyde diethylacetal     | 11.36 | 11.28 | 0.08  |
| Formamide                      | 4.21  | 3.99  | 0.22  |
| Formanilide                    | 14.29 | 14.22 | 0.07  |
| Formic acid                    | 3.39  | 3.37  | 0.02  |
| Freon 113                      | 10.37 | 10.33 | 0.04  |
| Fulvene                        | 10.90 | 10.76 | 0.14  |
| Fumaric acid dichloride        | 12.67 | 12.44 | 0.23  |
| Furan                          | 7.20  | 7.54  | -0.34 |
| Furfural                       | 10.08 | 9.62  | 0.46  |
| Furfuranol                     | 9.90  | 9.97  | -0.07 |
| Furfuryl butyrate              | 17.33 | 17.45 | -0.12 |
| Furfuryl propionate            | 15.42 | 15.61 | -0.19 |

|                               |        |        |       |
|-------------------------------|--------|--------|-------|
| Furfurylacetate               | 13.72  | 13.78  | -0.06 |
| gamma-Butyrolactone           | 7.90   | 8.04   | -0.14 |
| gamma-Caprolactone            | 11.84  | 11.71  | 0.13  |
| gamma-Coniceine               | 15.71  | 15.94  | -0.23 |
| gamma-Octanoic lactone        | 15.32  | 15.38  | -0.06 |
| gamma-Terpinene               | 17.96  | 18.23  | -0.27 |
| gamma-Undecanolactone         | 20.72  | 20.89  | -0.17 |
| gamma-Valerolactone           | 9.77   | 9.87   | -0.10 |
| Geranyl 2-methylpropanoate    | 26.95  | 27.12  | -0.17 |
| Geranyl acetate               | 23.36  | 23.46  | -0.10 |
| Glutaconodinitrile            | 9.92   | 9.78   | 0.14  |
| Glycerol 1,3-dinitrate        | 13.26  | 12.96  | 0.30  |
| Glycerol 1-butanoate          | 15.40  | 15.51  | -0.11 |
| Glycerol 1-oleate             | 41.29  | 41.13  | 0.16  |
| Glycerol tricaproate          | 41.14  | 41.48  | -0.34 |
| Glycerol tristearate          | 107.48 | 107.55 | -0.07 |
| Glyceryl tributanoate         | 30.27  | 30.46  | -0.19 |
| Glyceryl-1-nitrate            | 10.70  | 10.50  | 0.20  |
| Glyceryltriacetate            | 19.30  | 19.45  | -0.15 |
| Glycidyl acrylate             | 12.26  | 12.26  | 0.00  |
| Glycidyl methacrylate         | 14.48  | 14.12  | 0.36  |
| Glycolaldehyde                | 4.93   | 5.28   | -0.35 |
| Glyme                         | 9.51   | 9.51   | 0.00  |
| Glyoxal                       | 4.70   | 4.93   | -0.23 |
| Guaiol                        | 27.18  | 27.15  | 0.03  |
| Hemimellitene                 | 16.03  | 16.23  | -0.20 |
| Heneicosane                   | 39.44  | 39.39  | 0.05  |
| Heptacosane                   | 50.47  | 50.40  | 0.07  |
| Heptadecane                   | 32.09  | 32.05  | 0.04  |
| Heptadecanonitrile            | 32.01  | 31.97  | 0.04  |
| Heptadecylbenzene             | 41.79  | 41.78  | 0.01  |
| Heptafluorobutanoic anhydride | 17.41  | 17.07  | 0.34  |
| Heptafluorobutanoyl chloride  | 10.71  | 10.77  | -0.06 |
| Heptaldoxime                  | 15.13  | 15.48  | -0.35 |
| Heptane                       | 13.72  | 13.70  | 0.02  |
| Heptanedioic acid             | 14.90  | 14.96  | -0.06 |
| Heptanoamide                  | 15.27  | 14.94  | 0.33  |
| Heptanoic anhydride           | 26.82  | 27.25  | -0.43 |
| Heptanonitrile                | 13.48  | 13.61  | -0.13 |
| Heptanophenone                | 23.55  | 23.54  | 0.01  |
| Heptanoyl chloride            | 16.01  | 15.86  | 0.15  |
| Heptasilane                   | 33.60  | 33.63  | -0.03 |



|                                     |       |       |       |
|-------------------------------------|-------|-------|-------|
| Heptyl 1-naphthaleneacetate         | 34.77 | 34.91 | -0.14 |
| Heptyl 1-naphthoate                 | 33.29 | 33.08 | 0.21  |
| Heptyl 1-naphthylketone             | 32.56 | 32.49 | 0.07  |
| Heptyl 2-naphthaleneacetate         | 34.89 | 34.91 | -0.02 |
| Heptyl 2-thiophenecarboxylate       | 25.58 | 25.35 | 0.23  |
| Heptyl bromide                      | 16.74 | 16.76 | -0.02 |
| Heptyl butyrate                     | 21.78 | 21.73 | 0.05  |
| Heptyl pentanoate                   | 23.57 | 23.57 | 0.00  |
| Heptylbenzene                       | 23.44 | 23.43 | 0.01  |
| Heptylcyclohexane                   | 23.88 | 23.84 | 0.04  |
| Heptylcyclopentane                  | 22.04 | 22.01 | 0.03  |
| Heptyliodoacetylene                 | 21.61 | 21.61 | 0.00  |
| Heptyloxytrimethylsilane            | 23.31 | 23.32 | -0.01 |
| Heptylphosphinic dichloride         | 21.24 | 21.30 | -0.06 |
| Hexabromoethane                     | 23.58 | 23.49 | 0.09  |
| Hexachloroacetone                   | 18.04 | 18.13 | -0.09 |
| Hexachlorobutadiene                 | 19.75 | 19.62 | 0.13  |
| Hexachloropropylene                 | 17.77 | 17.91 | -0.14 |
| Hexacosane                          | 48.80 | 48.57 | 0.23  |
| Hexacosanoic acid                   | 49.56 | 49.20 | 0.36  |
| Hexadecamethylheptasiloxane         | 56.41 | 56.37 | 0.04  |
| Hexadecanedioic acid                | 31.43 | 31.48 | -0.05 |
| Hexadecanenitrile                   | 30.17 | 30.13 | 0.04  |
| Hexadecanoyl chloride               | 32.56 | 32.38 | 0.18  |
| Hexadecyl acetate                   | 34.92 | 34.58 | 0.34  |
| Hexadecyl vinyl ether               | 34.46 | 34.28 | 0.18  |
| Hexadecylamine                      | 31.62 | 31.57 | 0.05  |
| Hexadecylbenzene                    | 39.95 | 39.95 | 0.00  |
| Hexadecylcyclohexane                | 40.65 | 40.36 | 0.29  |
| Hexaethyl tetraphosphate            | 39.91 | 39.92 | -0.01 |
| Hexaethylbenzene                    | 33.03 | 32.96 | 0.07  |
| Hexaethyldisiloxane                 | 30.09 | 30.27 | -0.18 |
| Hexaethylene glycol                 | 27.22 | 27.34 | -0.12 |
| Hexaethyltetraphosphate             | 39.91 | 39.92 | -0.01 |
| Hexafluorobenzene                   | 10.50 | 10.27 | 0.23  |
| Hexafluoropropyl-1,3-diisocyanate   | 12.36 | 12.22 | 0.14  |
| Hexahydro-1-methyl-1H-1,4-diazepine | 14.04 | 13.88 | 0.16  |
| Hexamethyldisilane                  | 20.38 | 20.36 | 0.02  |
| Hexamethyldisiloxane                | 19.40 | 19.40 | 0.00  |
| Hexane                              | 11.80 | 11.86 | -0.06 |
| Hexanenitrile                       | 11.77 | 11.78 | -0.01 |
| Hexanoic anhydride                  | 23.74 | 23.58 | 0.16  |

|                                           |       |       |       |
|-------------------------------------------|-------|-------|-------|
| Hexanophenone                             | 21.56 | 21.70 | -0.14 |
| Hexanoyl chloride                         | 13.98 | 14.02 | -0.04 |
| Hexapropyldisiloxane                      | 41.25 | 41.29 | -0.04 |
| Hexasilane                                | 28.85 | 28.86 | -0.01 |
| Hexyl 1-naphthaleneacetate                | 32.88 | 33.08 | -0.20 |
| Hexyl 1-naphthoate                        | 31.44 | 31.24 | 0.20  |
| Hexyl 1-naphthylketone                    | 30.69 | 30.66 | 0.03  |
| Hexyl 2-naphthaleneacetate                | 33.10 | 33.08 | 0.02  |
| Hexyl 2-naphthoate                        | 31.66 | 31.24 | 0.42  |
| Hexyl 2-thiophenecarboxylate              | 23.72 | 23.52 | 0.20  |
| Hexyl bromide                             | 14.91 | 14.93 | -0.02 |
| Hexyl butanoate                           | 19.81 | 19.90 | -0.09 |
| Hexyl cyclohexyloxy dithiophosphinic acid | 32.28 | 32.36 | -0.08 |
| Hexyl dichloro phosphorus thioxide        | 22.39 | 22.38 | 0.01  |
| Hexyl hexanoate                           | 23.54 | 23.57 | -0.03 |
| Hexyl hexyloxy dithiophosphinic acid      | 33.21 | 33.20 | 0.01  |
| Hexyl isopentoxy dithiophosphinic acid    | 31.37 | 31.35 | 0.02  |
| Hexyl methacrylate                        | 19.77 | 19.80 | -0.03 |
| Hexyl methoxy dithiophosphinic acid       | 23.94 | 24.01 | -0.07 |
| Hexyl nitrite                             | 14.31 | 14.28 | 0.03  |
| Hexyl octanoate                           | 27.31 | 27.24 | 0.07  |
| Hexyl octyloxy dithiophosphinic acid      | 36.79 | 36.87 | -0.08 |
| Hexyl pentanoate                          | 21.77 | 21.73 | 0.04  |
| Hexyl perfluorobutyrate                   | 20.40 | 20.31 | 0.09  |
| Hexyl phenyl sulfide                      | 24.96 | 24.89 | 0.07  |
| Hexyl propanoate                          | 18.48 | 18.06 | 0.42  |
| Hexylbenzene                              | 21.55 | 21.60 | -0.05 |
| Hexylcyclohexane                          | 22.04 | 22.01 | 0.03  |
| Hexylcyclopentane                         | 20.20 | 20.17 | 0.03  |
| Hexyldichloroborane                       | 17.47 | 17.45 | 0.02  |
| Hexyleneglycol                            | 13.05 | 12.96 | 0.09  |
| Hexyloxybenzene                           | 22.35 | 22.29 | 0.06  |
| Hexyloxytrimethylsilane                   | 21.47 | 21.48 | -0.01 |
| Hexylphosphinic dichloride                | 19.77 | 19.47 | 0.30  |
| Hexylsilane                               | 15.99 | 15.97 | 0.02  |
| HMDS                                      | 20.43 | 20.34 | 0.09  |
| Homocamfin                                | 18.57 | 18.38 | 0.19  |
| Hydroabietyl acrylate                     | 40.60 | 40.96 | -0.36 |
| Hydrocinnamitrile                         | 15.95 | 16.01 | -0.06 |
| Hydrocinnamyl alcohol                     | 16.91 | 16.65 | 0.26  |
| Hydroxycitronellal                        | 19.88 | 19.93 | -0.05 |
| Imidazole                                 | 7.44  | 7.39  | 0.05  |

|                                                                 |       |       |       |
|-----------------------------------------------------------------|-------|-------|-------|
| Indane                                                          | 15.20 | 15.31 | -0.11 |
| Indene                                                          | 15.32 | 15.23 | 0.09  |
| Iodoacetonitrile                                                | 9.47  | 9.54  | -0.07 |
| Iodobenzene                                                     | 15.52 | 15.50 | 0.02  |
| Iodocyclopentane                                                | 14.37 | 14.41 | -0.04 |
| Iodopentafluorobenzene                                          | 15.36 | 15.30 | 0.06  |
| Iodopentafluoroethane                                           | 9.78  | 9.71  | 0.07  |
| Iophendylate                                                    | 40.46 | 40.10 | 0.36  |
| Isoamyl acetate                                                 | 14.43 | 14.37 | 0.06  |
| iso-Amyl dichloro phosphorus oxide                              | 17.05 | 17.24 | -0.19 |
| iso-Amyl dichloro phosphorus thioxide                           | 20.54 | 20.53 | 0.01  |
| Isoamyl iodide                                                  | 15.11 | 15.11 | 0.00  |
| Isoamyl lactate                                                 | 16.72 | 16.77 | -0.05 |
| Isoamylisonitrile                                               | 11.74 | 11.96 | -0.22 |
| Isobutyric anhydride                                            | 16.16 | 16.21 | -0.05 |
| Isobutyl 2-chloropropionate                                     | 16.17 | 16.26 | -0.09 |
| Isobutyl 3-chloropropionate                                     | 16.32 | 16.28 | 0.04  |
| Isobutyl acetate                                                | 12.53 | 12.54 | -0.01 |
| Isobutyl acrylate                                               | 14.30 | 14.25 | 0.05  |
| Isobutyl allyloxy dithiophosphinic acid                         | 23.74 | 23.93 | -0.19 |
| Isobutyl bromide                                                | 11.14 | 11.24 | -0.10 |
| Isobutyl butyrate                                               | 16.69 | 16.21 | 0.48  |
| Isobutyl chloride                                               | 10.10 | 10.08 | 0.02  |
| Isobutyl chlorocarbonate                                        | 12.78 | 12.69 | 0.09  |
| Isobutyl cyclohexylchloroboronate                               | 22.58 | 22.50 | 0.08  |
| Isobutyl dichloro phosphorus oxide                              | 15.45 | 15.45 | 0.00  |
| Isobutyl diisobutoxy phosphorus                                 | 27.60 | 27.38 | 0.22  |
| Isobutyl ethoxyethoxy dithiophosphinic acid                     | 26.52 | 26.56 | -0.04 |
| Isobutyl ethoxyethoxy S-(2-cyanoethyl)<br>dithiophosphinate     | 31.70 | 31.82 | -0.12 |
| Isobutyl formate                                                | 10.83 | 10.75 | 0.08  |
| Isobutyl iodide                                                 | 13.29 | 13.28 | 0.01  |
| Isobutyl isobutyrate                                            | 16.22 | 16.19 | 0.03  |
| Isobutyl isopropoxy dithiophosphinic acid                       | 24.15 | 24.06 | 0.09  |
| Isobutyl isopropoxy S-methoxycarbonylethyl<br>dithiophosphinate | 32.16 | 31.92 | 0.24  |
| Isobutyl isothiocyanate                                         | 13.96 | 13.98 | -0.02 |
| Isobutyl isovalerate                                            | 18.05 | 18.03 | 0.02  |
| Isobutyl methacrylate                                           | 16.10 | 16.11 | -0.01 |
| Isobutyl methyl ketone                                          | 11.98 | 11.95 | 0.03  |
| Isobutyl nitrate                                                | 11.34 | 11.19 | 0.15  |
| Isobutyl propanoate                                             | 14.00 | 14.37 | -0.37 |

|                                               |       |       |       |
|-----------------------------------------------|-------|-------|-------|
| Isobutyl ricinoleate                          | 42.15 | 42.39 | -0.24 |
| Isobutyl salicylate                           | 21.60 | 21.14 | 0.46  |
| Isobutyl t-butylether                         | 16.32 | 16.17 | 0.15  |
| Isobutyl trichloroacetate                     | 18.44 | 18.37 | 0.07  |
| Isobutyl urethane                             | 15.73 | 15.67 | 0.06  |
| Isobutyl valerate                             | 17.81 | 18.04 | -0.23 |
| Isobutyl vinyl ether                          | 12.48 | 12.24 | 0.24  |
| Isobutylbenzene                               | 17.92 | 17.91 | 0.01  |
| Isobutylcyclohexane                           | 18.38 | 18.32 | 0.06  |
| Isobutylcyclopentane                          | 16.63 | 16.49 | 0.14  |
| Isobutyldimethylamine                         | 13.42 | 13.39 | 0.03  |
| Isobutylnitrite                               | 10.67 | 10.59 | 0.08  |
| iso-Butylsilane                               | 12.31 | 12.29 | 0.02  |
| Isobutyronitrile                              | 8.08  | 8.09  | -0.01 |
| Isobutyroylbromide                            | 11.55 | 11.51 | 0.04  |
| Isobutyroylchloride                           | 10.24 | 10.34 | -0.10 |
| Isocrotonic acid                              | 8.85  | 8.74  | 0.11  |
| Isocumene                                     | 16.02 | 16.09 | -0.07 |
| Isodecyl acrylate                             | 25.14 | 25.26 | -0.12 |
| Isofluorophate                                | 16.14 | 16.07 | 0.07  |
| Isohexanoic acid                              | 12.48 | 12.48 | 0.00  |
| Isooctane                                     | 15.46 | 15.51 | -0.05 |
| Isopentane                                    | 10.03 | 10.01 | 0.02  |
| Isopentene                                    | 9.85  | 9.93  | -0.08 |
| Isopentyl 2-chloropropanoate                  | 18.16 | 18.10 | 0.06  |
| Isopentyl alcohol                             | 10.58 | 10.57 | 0.01  |
| Isopentyl bromide                             | 13.12 | 13.08 | 0.04  |
| Isopentyl butanoate                           | 18.00 | 18.04 | -0.04 |
| Isopentyl chloride                            | 11.92 | 11.91 | 0.01  |
| Isopentyl dichloro phosphorus oxide           | 17.24 | 17.28 | -0.04 |
| Isopentyl ethoxyethoxy dithiophosphinic acid  | 28.39 | 28.39 | 0.00  |
| Isopentyl formate                             | 12.64 | 12.59 | 0.05  |
| Isopentyl isopentanoate                       | 19.84 | 19.86 | -0.02 |
| iso-Pentyl isopropoxy dithiophosphinic acid   | 25.96 | 25.85 | 0.11  |
| Isopentyl methoxyethoxy dithiophosphinic acid | 26.50 | 26.55 | -0.05 |
| Isopentyl nitrite                             | 12.52 | 12.43 | 0.09  |
| Isopentyl propionate                          | 16.18 | 16.21 | -0.03 |
| Isopentyl propoxy dithiophosphinic acid       | 25.93 | 25.89 | 0.04  |
| Isopentyl salicylate                          | 23.36 | 22.98 | 0.38  |
| Isopentylamine                                | 11.36 | 11.37 | -0.01 |
| Isopentylbenzene                              | 19.73 | 19.74 | -0.01 |
| Isopentyloxytrimethylsilane                   | 19.64 | 19.63 | 0.01  |

|                                                   |       |       |       |
|---------------------------------------------------|-------|-------|-------|
| Isophorol                                         | 17.02 | 17.02 | 0.00  |
| Isophthaloylchloride                              | 19.02 | 18.65 | 0.37  |
| Isophytol                                         | 37.59 | 37.92 | -0.33 |
| Isoprene                                          | 10.10 | 9.81  | 0.29  |
| Isopropanolamine                                  | 8.29  | 8.28  | 0.01  |
| Isopropenyl methyl ketone                         | 9.94  | 10.04 | -0.10 |
| Isopropenylacetate                                | 10.66 | 10.48 | 0.18  |
| Isopropenylacetylene                              | 9.32  | 9.12  | 0.20  |
| Isopropyl (2,4-dichlorophenoxy)acetate            | 25.20 | 24.97 | 0.23  |
| Isopropyl 2-(2,3-dihydroxypropoxy)ethyl thioether | 20.49 | 20.46 | 0.03  |
| Isopropyl 2-chloropropanoate                      | 14.49 | 14.46 | 0.03  |
| Isopropyl 2-furoate                               | 15.95 | 15.62 | 0.33  |
| Isopropyl 3-methylbutanoate                       | 16.09 | 16.21 | -0.12 |
| Isopropyl acetoacetate                            | 14.62 | 14.50 | 0.12  |
| Isopropyl benzoate                                | 18.48 | 18.62 | -0.14 |
| Isopropyl butyrate                                | 14.36 | 14.39 | -0.03 |
| Isopropyl chloroacetate                           | 13.06 | 12.63 | 0.43  |
| Isopropyl formate                                 | 9.00  | 8.94  | 0.06  |
| Isopropyl hydroperoxide                           | 7.94  | 7.84  | 0.10  |
| Isopropyl isocyanate                              | 9.08  | 9.13  | -0.05 |
| Isopropyl isopropanethiolsulfinate                | 18.83 | 18.89 | -0.06 |
| Isopropyl lactate                                 | 12.95 | 13.12 | -0.17 |
| Isopropyl laurate                                 | 28.96 | 29.08 | -0.12 |
| Isopropyl methacrylate                            | 14.29 | 14.30 | -0.01 |
| Isopropyl methyl ether                            | 8.91  | 8.85  | 0.06  |
| Isopropyl methyl sulfide                          | 11.34 | 11.24 | 0.10  |
| Isopropyl myristate                               | 32.62 | 32.75 | -0.13 |
| Isopropyl N,N-diethylamino phosphorusoxy chloride | 20.14 | 20.18 | -0.04 |
| Isopropyl N,N-diethylamino phosphorusoxy fluoride | 17.83 | 17.82 | 0.01  |
| Isopropyl nicotinate                              | 17.90 | 17.71 | 0.19  |
| Isopropyl palmitate                               | 36.85 | 36.42 | 0.43  |
| Isopropyl pentanoate                              | 16.37 | 16.23 | 0.14  |
| Isopropyl propionate                              | 12.52 | 12.56 | -0.04 |
| Isopropyl propyl ether                            | 12.61 | 12.53 | 0.08  |
| Isopropyl salicylate                              | 19.80 | 19.32 | 0.48  |
| Isopropyl trichloroacetate                        | 16.72 | 16.56 | 0.16  |
| Isopropyl trifluoroacetate                        | 11.29 | 10.83 | 0.46  |
| Isopropyl vinyl ether                             | 10.60 | 10.42 | 0.18  |
| Isopropylacetate                                  | 10.69 | 10.72 | -0.03 |
| Isopropylamine                                    | 7.77  | 7.69  | 0.08  |
| Isopropylcyclohexane                              | 16.47 | 16.49 | -0.02 |
| Isopropylcyclopentane                             | 14.67 | 14.65 | 0.02  |

|                                                |       |       |       |
|------------------------------------------------|-------|-------|-------|
| Isopropylcyclopropane                          | 11.31 | 10.98 | 0.33  |
| Isopropylisopropoxyphosphinic chloride         | 16.10 | 16.07 | 0.03  |
| Isopropylmethylsilane                          | 12.15 | 12.24 | -0.09 |
| Isopropylnitrate                               | 9.58  | 9.38  | 0.20  |
| Isopropylphenylether                           | 16.81 | 16.78 | 0.03  |
| Isopropylphenylphosphinic chloride             | 20.09 | 19.71 | 0.38  |
| Isopropylphosphonyl difluoride                 | 9.34  | 9.42  | -0.08 |
| Isopropylpropoxyphosphinic chloride            | 16.12 | 16.06 | 0.06  |
| Isopropylsulfinyl chloride                     | 11.82 | 12.04 | -0.22 |
| Isopropylsulfonic acid                         | 10.78 | 10.56 | 0.22  |
| Isopropylsulfonyl fluoride                     | 10.21 | 10.16 | 0.05  |
| Isopropylthioacetate                           | 13.09 | 13.30 | -0.21 |
| Isopropyltriisothiocyantosilane                | 27.56 | 27.41 | 0.15  |
| Isopropyltrimethylsilane                       | 15.25 | 15.69 | -0.44 |
| Isopulegol                                     | 18.81 | 18.79 | 0.02  |
| Isopulegol acetate                             | 22.89 | 22.59 | 0.30  |
| Isoquinaldine                                  | 18.25 | 18.69 | -0.44 |
| Isoquinoline                                   | 16.38 | 16.72 | -0.34 |
| Isovaleraldehyde                               | 10.15 | 10.22 | -0.07 |
| Isovaleronitrile                               | 9.93  | 9.93  | 0.00  |
| Isoxazole                                      | 6.56  | 6.66  | -0.10 |
| Jasmone                                        | 20.22 | 20.19 | 0.03  |
| Ketene                                         | 4.40  | 4.49  | -0.09 |
| Lactonitrile                                   | 7.00  | 6.83  | 0.17  |
| L-Alanine 1-methylethyl ester dodecyl sulfate  | 40.78 | 40.95 | -0.17 |
| L-Alanine 2-methylpropyl ester dodecyl sulfate | 42.57 | 42.76 | -0.19 |
| Lauric acid                                    | 23.07 | 23.51 | -0.44 |
| Laurocapram                                    | 34.22 | 34.53 | -0.31 |
| Lauronitrile                                   | 22.81 | 22.79 | 0.02  |
| Linalool                                       | 19.35 | 19.57 | -0.22 |
| Linalyl acetate                                | 23.19 | 23.37 | -0.18 |
| Linoleic acid                                  | 34.37 | 34.36 | 0.01  |
| L-Menthone                                     | 18.37 | 18.41 | -0.04 |
| Longifolene                                    | 25.74 | 25.67 | 0.07  |
| L-Proline 1-methylethyl ester dodecyl sulfate  | 43.73 | 43.83 | -0.10 |
| Lupeol                                         | 51.80 | 52.02 | -0.22 |
| L-Valine 1-methylethyl ester dodecyl sulfate   | 44.65 | 44.60 | 0.05  |
| m-Anisidine                                    | 14.81 | 14.71 | 0.10  |
| Margaric acid                                  | 32.73 | 32.68 | 0.05  |
| m-Cresol                                       | 13.01 | 13.12 | -0.11 |
| m-Cresylacetate                                | 16.72 | 16.87 | -0.15 |
| Mecrylate                                      | 10.60 | 10.53 | 0.07  |

|                                        |       |       |       |
|----------------------------------------|-------|-------|-------|
| Menthol                                | 18.79 | 18.87 | -0.08 |
| Menthone                               | 18.36 | 18.41 | -0.05 |
| Menthyl isovalerate                    | 28.13 | 28.16 | -0.03 |
| Menthylacetate                         | 22.86 | 22.67 | 0.19  |
| Mercaptoacetic acid                    | 8.21  | 8.19  | 0.02  |
| Mesoxalic acid diethylester oxime      | 17.19 | 16.79 | 0.40  |
| Metasystox                             | 22.61 | 22.77 | -0.16 |
| Methacrolein                           | 8.27  | 8.30  | -0.03 |
| Methacryloyl chloride                  | 10.12 | 10.26 | -0.14 |
| Methanesulfonic acid                   | 6.67  | 6.81  | -0.14 |
| Methanesulfonylchloride                | 8.36  | 8.09  | 0.27  |
| Methanol                               | 3.26  | 3.23  | 0.03  |
| Metharbital                            | 18.81 | 19.07 | -0.26 |
| Methoxy(methoxymethoxy)methane         | 10.15 | 10.00 | 0.15  |
| Methoxyacetaldehyde                    | 7.00  | 7.22  | -0.22 |
| Methoxyacetic acid                     | 7.63  | 7.65  | -0.02 |
| Methoxyacetonitrile                    | 6.93  | 6.93  | 0.00  |
| Methoxyacetyl chloride                 | 9.17  | 9.18  | -0.01 |
| Methoxyacetylene                       | 6.43  | 6.24  | 0.19  |
| Methoxydichloromethylsulfenyl chloride | 14.32 | 14.33 | -0.01 |
| Methoxytriethylsilane                  | 17.64 | 17.73 | -0.09 |
| Methoxytrimethylsilane                 | 12.21 | 12.29 | -0.08 |
| Methoxytripropylsilane                 | 23.24 | 23.23 | 0.01  |
| Methyl (Z) 9-octadecenoate             | 36.29 | 36.32 | -0.03 |
| Methyl 10-undecenoate                  | 23.27 | 23.43 | -0.16 |
| Methyl 1-naphthoate                    | 21.97 | 22.06 | -0.09 |
| Methyl 1-naphthylacetate               | 23.69 | 23.89 | -0.20 |
| Methyl 2,3-dibromopropanoate           | 15.15 | 15.03 | 0.12  |
| Methyl 2-benzoylbenzoate               | 27.04 | 26.69 | 0.35  |
| Methyl 2-chloroacrylate                | 10.63 | 10.70 | -0.07 |
| Methyl 2-furoate                       | 12.18 | 11.93 | 0.25  |
| Methyl 2-hydroxy-3-methylbenzoate      | 17.56 | 17.54 | 0.02  |
| Methyl 2-hydroxy-5-methylbenzoate      | 17.57 | 17.54 | 0.03  |
| Methyl 2-methoxybenzoate               | 17.70 | 17.52 | 0.18  |
| Methyl 2-methylacetoacetate            | 12.67 | 12.63 | 0.04  |
| Methyl 2-naphthaleneacetate            | 23.79 | 23.89 | -0.10 |
| Methyl 2-octynoate                     | 17.62 | 17.45 | 0.17  |
| Methyl 2-thiophenecarboxylate          | 14.44 | 14.33 | 0.11  |
| Methyl 3-(methylthio)propanoate        | 13.66 | 13.76 | -0.10 |
| Methyl 3,3-dimethylacrylate            | 12.57 | 12.49 | 0.08  |
| Methyl 3-butenolate                    | 10.43 | 10.58 | -0.15 |
| Methyl 3-chlorobutyrate                | 12.31 | 12.59 | -0.28 |

|                                          |       |       |       |
|------------------------------------------|-------|-------|-------|
| Methyl 3-cyclohexene-1-carboxylate       | 15.05 | 15.27 | -0.22 |
| Methyl 3-hexenoate                       | 14.20 | 14.30 | -0.10 |
| Methyl 3-mercaptopropanoate              | 12.11 | 11.91 | 0.20  |
| Methyl 3-methoxybenzoate                 | 17.77 | 17.52 | 0.25  |
| Methyl 3-methoxypropanoate               | 11.27 | 11.36 | -0.09 |
| Methyl 3-methylbutyrate                  | 12.47 | 12.53 | -0.06 |
| Methyl 4-bromo-2-butenate                | 13.96 | 13.70 | 0.26  |
| Methyl 4-bromobutanoate                  | 13.95 | 13.77 | 0.18  |
| Methyl 4-chlorobutyrate                  | 12.44 | 12.61 | -0.17 |
| Methyl 4-chlorophenylphosphinic chloride | 18.08 | 17.98 | 0.10  |
| Methyl 5-bromovalerate                   | 15.63 | 15.61 | 0.02  |
| Methyl abietate                          | 37.20 | 37.36 | -0.16 |
| Methyl acetate                           | 6.96  | 7.04  | -0.08 |
| Methyl acrylate                          | 8.75  | 8.75  | 0.00  |
| Methyl benzenesulfonate                  | 16.17 | 16.28 | -0.11 |
| Methyl benzoate                          | 15.05 | 14.94 | 0.11  |
| Methyl benzoylacetate                    | 19.05 | 18.71 | 0.34  |
| Methyl bis(2,2-diethylhydrazino)silane   | 26.63 | 26.69 | -0.06 |
| Methyl bis(2,2-dimethylhydrazino)silane  | 19.34 | 19.41 | -0.07 |
| Methyl bis(2-chloropropoxy)silane        | 21.95 | 21.98 | -0.03 |
| Methyl bis(diethylamino)silane           | 23.78 | 23.67 | 0.11  |
| Methyl bromoacetate                      | 10.01 | 10.10 | -0.09 |
| Methyl but-3-yne-1-carboxylate           | 11.62 | 11.73 | -0.11 |
| Methyl carbamate                         | 6.52  | 6.40  | 0.12  |
| Methyl cellosolve                        | 7.66  | 7.57  | 0.09  |
| Methyl chlorocarbonate                   | 7.21  | 7.19  | 0.02  |
| Methyl chlorofluorophosphate             | 8.21  | 8.21  | 0.00  |
| Methyl chlorooxoacetate                  | 9.21  | 9.20  | 0.01  |
| Methyl crotonate                         | 10.73 | 10.63 | 0.10  |
| Methyl cyclobutanecarboxylate            | 11.78 | 11.68 | 0.10  |
| Methyl cyclohexanecarboxylate            | 15.02 | 15.35 | -0.33 |
| Methyl cyclopropanecarboxylate           | 10.08 | 9.84  | 0.24  |
| Methyl decanoate                         | 21.67 | 21.72 | -0.05 |
| Methyl dichloroacetate                   | 10.90 | 10.87 | 0.03  |
| Methyl dimethylmalonate                  | 14.96 | 15.05 | -0.09 |
| Methyl formate                           | 5.17  | 5.25  | -0.08 |
| Methyl hexanoate                         | 14.29 | 14.38 | -0.09 |
| Methyl hydrocinnamate                    | 18.44 | 18.61 | -0.17 |
| Methyl isoamyl ketone                    | 13.66 | 13.79 | -0.13 |
| Methyl isobutanoate                      | 10.63 | 10.69 | -0.06 |
| Methyl isonicotinate                     | 14.10 | 14.02 | 0.08  |
| Methyl laurate                           | 25.32 | 25.39 | -0.07 |



|                                                |       |       |       |
|------------------------------------------------|-------|-------|-------|
| Methyl levulinate                              | 12.51 | 12.65 | -0.14 |
| Methyl linolenate                              | 36.20 | 36.16 | 0.04  |
| Methyl methacrylate                            | 10.58 | 10.61 | -0.03 |
| Methyl methanesulfonate                        | 8.42  | 8.20  | 0.22  |
| Methyl methanethiosulfinate                    | 11.41 | 11.39 | 0.02  |
| Methyl methoxyacetate                          | 9.44  | 9.53  | -0.09 |
| Methyl N,N-diethylamino phosphorusoxy chloride | 16.48 | 16.53 | -0.05 |
| Methyl N,N-diethylamino phosphorusoxy fluoride | 14.29 | 14.17 | 0.12  |
| Methyl nonanoate                               | 19.70 | 19.88 | -0.18 |
| Methyl octadecanoate                           | 36.46 | 36.40 | 0.06  |
| Methyl octanoate                               | 17.98 | 18.05 | -0.07 |
| Methyl pentadecanoate                          | 30.88 | 30.90 | -0.02 |
| Methyl pentafluoropropanoate                   | 9.11  | 9.13  | -0.02 |
| Methyl pentyl sulfide                          | 14.96 | 14.92 | 0.04  |
| Methyl perfluorobutanoate                      | 11.23 | 11.12 | 0.11  |
| Methyl perfluorooctanoate                      | 19.07 | 19.06 | 0.01  |
| Methyl phenoxyacetate                          | 17.30 | 17.46 | -0.16 |
| Methyl phenylacetate                           | 16.69 | 16.77 | -0.08 |
| Methyl pivalate                                | 12.26 | 12.53 | -0.27 |
| Methyl propanoate                              | 8.79  | 8.87  | -0.08 |
| Methyl propenyl ketone                         | 10.09 | 10.05 | 0.04  |
| Methyl propyl disulfide                        | 14.74 | 14.50 | 0.24  |
| Methyl propyl sulfide                          | 11.28 | 11.25 | 0.03  |
| Methyl pyruvate                                | 8.59  | 8.98  | -0.39 |
| Methyl t-butyl disulfide                       | 16.43 | 16.48 | -0.05 |
| Methyl tert-pentyl sulfide                     | 15.20 | 14.91 | 0.29  |
| Methyl tetradecanoate                          | 29.04 | 29.06 | -0.02 |
| Methyl tiglate                                 | 12.68 | 12.49 | 0.19  |
| Methyl t-pentyl ether                          | 12.43 | 12.50 | -0.07 |
| Methyl trichloroacetate                        | 12.88 | 12.87 | 0.01  |
| Methyl trichloromethyl ether                   | 11.13 | 10.92 | 0.21  |
| Methyl tridecanoate                            | 27.22 | 27.22 | 0.00  |
| Methyl trifluoroacetate                        | 7.19  | 7.15  | 0.04  |
| Methyl tris(2,2-diethylhydrazino)silane        | 36.57 | 36.56 | 0.01  |
| Methyl undecanoate                             | 23.50 | 23.55 | -0.05 |
| Methyl valerate                                | 12.49 | 12.54 | -0.05 |
| Methyl vinyl ether                             | 6.79  | 6.73  | 0.06  |
| Methyl Z,Z-9,12-octadecadieneoate              | 36.23 | 36.24 | -0.01 |
| Methyl-1chloroethylether                       | 9.18  | 8.96  | 0.22  |
| Methylacetamide                                | 7.82  | 7.71  | 0.11  |
| Methylacetoacetate                             | 10.79 | 10.81 | -0.02 |
| Methylamine                                    | 4.01  | 4.06  | -0.05 |

|                                                   |       |       |       |
|---------------------------------------------------|-------|-------|-------|
| Methylbenzene                                     | 12.31 | 12.42 | -0.11 |
| Methylbutylphosphinic chloride                    | 13.88 | 13.88 | 0.00  |
| Methylchloroacetate                               | 8.84  | 8.94  | -0.10 |
| Methylchloroform                                  | 10.37 | 10.35 | 0.02  |
| Methylconiine                                     | 18.21 | 18.02 | 0.19  |
| Methylcyanoacetate                                | 8.81  | 8.79  | 0.02  |
| Methylcyclobutane                                 | 9.50  | 9.16  | 0.34  |
| Methylcyclohexane                                 | 12.88 | 12.83 | 0.05  |
| Methylcyclohexyldifluorosilane                    | 15.73 | 15.73 | 0.00  |
| Methylcyclohexylether                             | 13.50 | 13.51 | -0.01 |
| Methylcyclopentane                                | 11.04 | 11.00 | 0.04  |
| Methylcyclopropylketone                           | 9.49  | 9.27  | 0.22  |
| Methyldibutoxysilane                              | 21.75 | 21.88 | -0.13 |
| Methyldichloro-2-(2,4-dichlorophenoxy)ethylsilane | 27.87 | 27.80 | 0.07  |
| Methyldichloro-2-(4-chlorophenoxy)ethylsilane     | 25.96 | 25.88 | 0.08  |
| Methyldichloro-2,4-dichlorophenoxysilane          | 24.16 | 23.86 | 0.30  |
| Methyldichloro-2-butoxyethylsilane                | 21.85 | 21.56 | 0.29  |
| Methyldichloro-2-isobutoxyethylsilane             | 21.61 | 21.54 | 0.07  |
| Methyldichloro-2-phenoxyethylsilane               | 23.94 | 23.97 | -0.03 |
| Methyldichloro-4-chlorophenoxysilane              | 21.83 | 21.95 | -0.12 |
| Methyldichlorobutoxysilane                        | 17.70 | 17.70 | 0.00  |
| Methyldichlorophenoxysilane                       | 19.88 | 20.04 | -0.16 |
| Methyldiethyl-2-phenoxyethylsilane                | 27.78 | 27.88 | -0.10 |
| Methyldiethylphenoxysilane                        | 23.90 | 23.78 | 0.12  |
| Methylelaidate                                    | 36.27 | 36.32 | -0.05 |
| Methylenanthate                                   | 16.25 | 16.21 | 0.04  |
| Methylenebis(4-cyclohexylisocyanate)              | 28.55 | 28.54 | 0.01  |
| Methylenecyclobutane                              | 9.25  | 9.08  | 0.17  |
| Methylenecyclohexane                              | 12.74 | 12.75 | -0.01 |
| Methylenecyclopentane                             | 10.92 | 10.92 | 0.00  |
| Methylethylphosphinic chloride                    | 10.29 | 10.21 | 0.08  |
| Methylhydroperoxide                               | 4.26  | 4.15  | 0.11  |
| Methylisobutylphosphinic chloride                 | 13.92 | 13.87 | 0.05  |
| Methylisocyanate                                  | 5.16  | 5.51  | -0.35 |
| Methylisopropylphosphinic chloride                | 11.84 | 12.07 | -0.23 |
| Methylisothiocyanate                              | 8.32  | 8.50  | -0.18 |
| Methylactate                                      | 9.44  | 9.43  | 0.01  |
| Methylnitrate                                     | 5.79  | 5.69  | 0.10  |
| Methylnonylphenylsilane                           | 32.86 | 32.71 | 0.15  |
| Methyl-n-pentylether                              | 12.54 | 12.52 | 0.02  |
| Methyl-n-propylketone                             | 9.99  | 10.13 | -0.14 |
| Methyloctylphenylsilane                           | 30.99 | 30.88 | 0.11  |

|                                      |       |       |       |
|--------------------------------------|-------|-------|-------|
| Methyloxiran                         | 6.01  | 6.18  | -0.17 |
| Methylphenyldifluorosilane           | 15.17 | 15.29 | -0.12 |
| Methylphenylphosphinic chloride      | 15.91 | 16.07 | -0.16 |
| Methylphenylsilane                   | 16.18 | 16.46 | -0.28 |
| Methylphosphonic acid dimethyl ester | 10.43 | 10.56 | -0.13 |
| Methylphosphonyl difluoride          | 5.81  | 5.77  | 0.04  |
| Methylphosphoric acid ethylester     | 10.68 | 10.40 | 0.28  |
| Methylpropylether                    | 8.77  | 8.85  | -0.08 |
| Methylpropylphosphinic chloride      | 12.04 | 12.05 | -0.01 |
| Methylpropylsilane                   | 12.18 | 12.22 | -0.04 |
| Methylsalicylate                     | 15.90 | 15.64 | 0.26  |
| Methylsilanetriol triacetate         | 18.34 | 18.34 | 0.00  |
| Methylsulfinyl chloride              | 8.44  | 8.29  | 0.15  |
| Methylsulfonyl fluoride              | 6.32  | 6.41  | -0.09 |
| Methylthiirane                       | 8.74  | 8.64  | 0.10  |
| Methylthiocyanate                    | 7.53  | 7.56  | -0.03 |
| Methyltri(2-octyloxy)silane          | 51.47 | 51.52 | -0.05 |
| Methyltributoxysilane                | 29.49 | 29.48 | 0.01  |
| Methyltrichlorosilane                | 11.55 | 11.67 | -0.12 |
| Methyltriheptyloxysilane             | 45.99 | 46.00 | -0.01 |
| Methyltrihexyloxysilane              | 40.48 | 40.50 | -0.02 |
| Methyltriisopentyloxysilane          | 34.99 | 34.94 | 0.05  |
| Methyltripentyloxysilane             | 34.96 | 34.99 | -0.03 |
| Methyltriphenoxysilane               | 36.41 | 36.52 | -0.11 |
| Methylvinylchlorosilane              | 13.21 | 13.40 | -0.19 |
| Monoamyl adipate                     | 22.46 | 22.36 | 0.10  |
| Monobutyl adipate                    | 20.57 | 20.53 | 0.04  |
| Monobutyl succinate                  | 16.82 | 16.86 | -0.04 |
| Monoethyl adipate                    | 16.86 | 16.86 | 0.00  |
| Monohexyl adipate                    | 24.44 | 24.20 | 0.24  |
| Monomethyl adipate                   | 14.95 | 15.01 | -0.06 |
| Monomethyl glutarate                 | 13.01 | 13.18 | -0.17 |
| Monopropyl adipate                   | 18.69 | 18.69 | 0.00  |
| Montanic acid                        | 53.24 | 52.87 | 0.37  |
| Morpholine                           | 9.36  | 9.35  | 0.01  |
| Morpholinium formate                 | 12.76 | 12.79 | -0.03 |
| MTBE                                 | 10.58 | 10.66 | -0.08 |
| m-Toluidine                          | 14.05 | 14.03 | 0.02  |
| Muscone                              | 29.13 | 29.46 | -0.33 |
| Mustard gas                          | 15.32 | 15.13 | 0.19  |
| Mustard oil                          | 12.00 | 12.03 | -0.03 |
| Myrcene                              | 18.88 | 18.93 | -0.05 |

|                                                     |       |       |       |
|-----------------------------------------------------|-------|-------|-------|
| Myristicin                                          | 20.95 | 20.97 | -0.02 |
| Myristonitrile                                      | 26.37 | 26.46 | -0.09 |
| N-(1,1-Dimethylpropyl)aminotriethylsilane           | 25.68 | 25.84 | -0.16 |
| N-(1-Naphthyl)ethylenediamine                       | 24.61 | 24.37 | 0.24  |
| N-(2',3'-Epoxypropyl)-N-methylpyrrolidonium acetate | 22.00 | 21.59 | 0.41  |
| N-(2-Aminoethyl)ethanolamine                        | 11.53 | 11.44 | 0.09  |
| N-(2-Hydroxyethyl)-2-furfurylamine                  | 14.81 | 14.98 | -0.17 |
| N-(2-Hydroxypropyl)-2-furfurylamine                 | 16.74 | 16.82 | -0.08 |
| N-(2-Pyridinylmethyl)-2-pyridinemethanamine         | 23.59 | 23.64 | -0.05 |
| N-(3-(Trimethoxysilyl)propyl)-1,2-ethanediamine     | 23.07 | 22.94 | 0.13  |
| N-(3-Aminopropyl)-N-methyl-1,3-propanediamine       | 17.82 | 17.95 | -0.13 |
| N-(Hydroxyethyl)piperazine                          | 14.46 | 14.42 | 0.04  |
| N,N,N',N'-Tetraethyl-1,2-ethylenediamine            | 22.03 | 22.23 | -0.20 |
| N,N,N',N'-Tetramethyl-1,6-hexanediamine             | 22.15 | 22.29 | -0.14 |
| N,N-Bis(2-hydroxyethyl)butylamine                   | 18.17 | 18.16 | 0.01  |
| N,N-Bis(2-hydroxyethyl)ethylamine                   | 14.44 | 14.49 | -0.05 |
| N,N'-Dibenzyl-1,2-ethanediamine                     | 30.24 | 30.33 | -0.09 |
| N,N-Dibutylaminotriethylsilane                      | 31.18 | 31.44 | -0.26 |
| N,N-Dibutylaniline                                  | 27.32 | 27.05 | 0.27  |
| N,N-Dibutyl-difluoroacetamide                       | 20.77 | 20.65 | 0.12  |
| N,N'-Diethyl-1,2-ethanediamine                      | 14.49 | 14.53 | -0.04 |
| N,N-Diethyl-1,3-propanediamine                      | 16.65 | 16.57 | 0.08  |
| N,N-Diethyl-1-naphthalenamine                       | 26.54 | 26.83 | -0.29 |
| N,N-Diethyl-3-methylbutanamide                      | 18.83 | 18.84 | -0.01 |
| N,N-Diethylaminotriethylsilane                      | 24.18 | 24.10 | 0.08  |
| N,N-Diethylaniline                                  | 19.97 | 19.71 | 0.26  |
| N,N-Diethylbutanamide                               | 16.85 | 17.02 | -0.17 |
| N,N-Diethylformamide                                | 11.46 | 11.57 | -0.11 |
| N,N-Diethylhydroxylamine                            | 10.30 | 10.27 | 0.03  |
| N,N-Diethylpropanamide                              | 15.12 | 15.19 | -0.07 |
| N,N'-Diethylurea                                    | 12.15 | 12.36 | -0.21 |
| N,N-Diisobutylaminotriethylsilane                   | 31.18 | 31.41 | -0.23 |
| N,N-Dimethyl-1,2-ethanediamine                      | 11.15 | 11.10 | 0.05  |
| N,N-Dimethyl-1-naphthylamine                        | 23.00 | 23.19 | -0.19 |
| N,N-Dimethyl-3-toluidine                            | 18.12 | 17.98 | 0.14  |
| N,N-Dimethylacrylamide                              | 11.46 | 11.42 | 0.04  |
| N,N-Dimethylaniline                                 | 16.21 | 16.07 | 0.14  |
| N,N-Dimethylbenzylamine                             | 17.66 | 17.64 | 0.02  |
| N,N-Dimethylbutyramide                              | 13.25 | 13.38 | -0.13 |
| N,N-Dimethylcyclohexylamine                         | 16.09 | 16.20 | -0.11 |
| N,N-Dimethylethanolamine                            | 10.29 | 10.29 | 0.00  |

|                                                                  |       |       |       |
|------------------------------------------------------------------|-------|-------|-------|
| N,N-Dimethylformamide                                            | 7.93  | 7.93  | 0.00  |
| N,N-Dimethyl-N'-benzyl-1,2-ethanediamine                         | 22.58 | 22.64 | -0.06 |
| N,N-Dimethylpentanamide                                          | 15.12 | 15.22 | -0.10 |
| N,N-Dimethylpropionamide                                         | 11.46 | 11.55 | -0.09 |
| N,N-Dimethyl-p-toluidine                                         | 17.86 | 17.98 | -0.12 |
| N,N-Dipropylaniline                                              | 23.74 | 23.38 | 0.36  |
| N-Acetyethanolamine                                              | 10.25 | 10.09 | 0.16  |
| N-Acetyl-N-methylacetamide                                       | 11.51 | 11.48 | 0.03  |
| N-Allylaniline                                                   | 17.61 | 17.60 | 0.01  |
| n-Amyl ether                                                     | 19.93 | 19.87 | 0.06  |
| N-Benzyl-2-methylaniline                                         | 25.88 | 25.70 | 0.18  |
| N-Benzyl-N-ethylhydroxylamine                                    | 18.14 | 18.17 | -0.03 |
| n-Butyl acetate                                                  | 12.48 | 12.55 | -0.07 |
| n-Butyl acrylate                                                 | 14.41 | 14.27 | 0.14  |
| n-Butyl methyl ether                                             | 10.79 | 10.68 | 0.11  |
| n-Butyl-2-chloropropanoate                                       | 16.32 | 16.28 | 0.04  |
| n-Butyl-3-chloropropanoate                                       | 16.33 | 16.29 | 0.04  |
| N-Butyl-3-methylpyridinium<br>bis(trifluoromethylsulfonyl)amide  | 31.91 | 32.13 | -0.22 |
| N-Butyl-3-methylpyridinium<br>trifluoromethanesulfonate          | 25.47 | 25.47 | 0.00  |
| N-Butyl-4-methylthiazolium<br>bis(trifluoromethylsulfonyl) amide | 31.19 | 31.41 | -0.22 |
| N-Butyl-4-methylthiazolium difluoro(oxalato)borate               | 25.07 | 25.10 | -0.03 |
| N-Butylaniline                                                   | 19.73 | 19.56 | 0.17  |
| n-Butylbenzoate                                                  | 20.57 | 20.45 | 0.12  |
| n-Butylchloroacetate                                             | 14.40 | 14.46 | -0.06 |
| n-Butyldichloroacetate                                           | 16.42 | 16.38 | 0.04  |
| N-Butyl-difluoroacetamide                                        | 13.50 | 13.16 | 0.34  |
| n-Butylethylether                                                | 12.57 | 12.53 | 0.04  |
| n-Butylformate                                                   | 10.68 | 10.77 | -0.09 |
| n-Butylmethacrylate                                              | 16.10 | 16.13 | -0.03 |
| n-Butylmethylsulfide                                             | 13.12 | 13.08 | 0.04  |
| n-Butylnitrite                                                   | 10.64 | 10.61 | 0.03  |
| N-Butyl-N-methylmorpholinium N-acetylalaninate                   | 29.46 | 29.58 | -0.12 |
| N-Butyl-N-methylmorpholinium N-acetylleucinate                   | 35.05 | 35.07 | -0.02 |
| N-Butyl-N-methylmorpholinium N-acetylvalinate                    | 33.29 | 33.24 | 0.05  |
| n-Butylnonanoate                                                 | 25.56 | 25.40 | 0.16  |
| N-Butyl-N-phenylacetamide                                        | 23.05 | 23.33 | -0.28 |
| N-Butylpiperidine                                                | 18.14 | 18.03 | 0.11  |
| N-Butylpyridinium bis(trifluoromethanesulfonyl)<br>amide         | 30.21 | 30.23 | -0.02 |

|                                                              |       |       |       |
|--------------------------------------------------------------|-------|-------|-------|
| N-Butylpyridinium triflate                                   | 23.49 | 23.56 | -0.07 |
| N-Butylpyridinium trifluoroacetate                           | 21.75 | 21.96 | -0.21 |
| N-Butylthiazolium bis(trifluoromethylsulfonyl) amide         | 29.29 | 29.58 | -0.29 |
| N-Butylthiazolium difluoro(oxalato)borate                    | 23.16 | 23.27 | -0.11 |
| n-Butyltrichloroacetate                                      | 18.39 | 18.39 | 0.00  |
| n-Crotylacetate                                              | 12.41 | 12.47 | -0.06 |
| N-Cyclohexylaniline                                          | 22.15 | 22.36 | -0.21 |
| n-Decanoic acid                                              | 19.87 | 19.84 | 0.03  |
| n-Decyl alcohol                                              | 19.82 | 19.76 | 0.06  |
| n-Decylacetate                                               | 23.53 | 23.57 | -0.04 |
| n-Decylamine                                                 | 20.58 | 20.56 | 0.02  |
| N-Decylpyridinium bis(trifluoromethanesulfonyl) amide        | 41.43 | 41.24 | 0.19  |
| n-Dodecanal                                                  | 22.83 | 23.08 | -0.25 |
| n-Dodecylamine                                               | 24.26 | 24.23 | 0.03  |
| n-Dodecylmercaptan                                           | 25.98 | 25.91 | 0.07  |
| N-Dodecylpyridinium bis(trifluoromethanesulfonyl) amide      | 45.06 | 44.91 | 0.15  |
| Neohexane                                                    | 11.96 | 11.85 | 0.11  |
| Neomenthol                                                   | 18.92 | 18.87 | 0.05  |
| Neopentylbenzene                                             | 19.74 | 19.75 | -0.01 |
| Neopentylidenebromide                                        | 16.19 | 16.07 | 0.12  |
| Neral                                                        | 19.62 | 19.30 | 0.32  |
| Nerol                                                        | 19.65 | 19.66 | -0.01 |
| N-Ethyl-1,2-ethanediamine                                    | 10.97 | 10.89 | 0.08  |
| N-Ethyl-1-naphthalenamine                                    | 23.18 | 23.01 | 0.17  |
| N-Ethyl-1-propanamine                                        | 11.26 | 11.36 | -0.10 |
| N-Ethyl-2-methylallylamine                                   | 13.27 | 13.10 | 0.17  |
| N-Ethyl-2-methylaniline                                      | 17.89 | 17.80 | 0.09  |
| N-Ethyl-2-methylpyridinium bis(trifluoromethylsulfonyl)amide | 28.36 | 28.36 | 0.00  |
| N-Ethylaniline                                               | 16.04 | 15.89 | 0.15  |
| N-Ethylbenzaldehydeimine                                     | 17.62 | 17.43 | 0.19  |
| N-Ethylformamide                                             | 7.87  | 7.75  | 0.12  |
| N-Ethylmorpholine                                            | 13.37 | 13.20 | 0.17  |
| N-Ethylmorpholinium formate                                  | 16.28 | 16.52 | -0.24 |
| N-Ethyl-N-methylmorpholinium N-acetylalaninate               | 25.86 | 25.91 | -0.05 |
| N-Ethyl-N-methylmorpholinium N-acetylisoleucinate            | 31.16 | 31.40 | -0.24 |
| N-Ethyl-N-methylmorpholinium N-acetylleucinate               | 31.18 | 31.40 | -0.22 |
| N-Ethyl-N-methylmorpholinium N-acetylvalinate                | 29.34 | 29.57 | -0.23 |
| N-Fenchylaminotriethylsilane                                 | 33.19 | 33.29 | -0.10 |
| n-Heptaldehyde                                               | 13.83 | 13.90 | -0.07 |

|                                                                                   |       |       |       |
|-----------------------------------------------------------------------------------|-------|-------|-------|
| n-Heptylacetate                                                                   | 17.95 | 18.06 | -0.11 |
| n-Heptylamine                                                                     | 15.06 | 15.06 | 0.00  |
| n-Heptylformate                                                                   | 16.26 | 16.28 | -0.02 |
| n-Heptylnitrite                                                                   | 15.72 | 16.11 | -0.39 |
| n-Hexanoic acid                                                                   | 12.55 | 12.49 | 0.06  |
| n-Hexylacetate                                                                    | 16.11 | 16.22 | -0.11 |
| n-Hexylamine                                                                      | 13.20 | 13.22 | -0.02 |
| n-Hexylformate                                                                    | 14.42 | 14.44 | -0.02 |
| N-Hexyl-N-methylmorpholinium N-acetylalaninate                                    | 33.07 | 33.25 | -0.18 |
| N-Hexyl-N-methylmorpholinium N-acetylleucinate                                    | 38.55 | 38.74 | -0.19 |
| N-Hexyl-N-methylmorpholinium N-acetylvalinate                                     | 36.57 | 36.91 | -0.34 |
| Nikethamide                                                                       | 20.43 | 20.34 | 0.09  |
| N-Isobutyl-3-sulfopropan-1-aminium hydrogen sulfate                               | 24.91 | 24.86 | 0.05  |
| N-Isobutylaniline                                                                 | 19.53 | 19.55 | -0.02 |
| N-Isopropylaminotriethylsilane                                                    | 22.22 | 22.17 | 0.05  |
| N-Isopropylaniline                                                                | 17.60 | 17.70 | -0.10 |
| Nitrobenzene                                                                      | 13.04 | 13.16 | -0.12 |
| Nitrocyclohexane                                                                  | 13.25 | 13.18 | 0.07  |
| Nitroethane                                                                       | 6.78  | 6.79  | -0.01 |
| Nitroisobutane                                                                    | 10.44 | 10.45 | -0.01 |
| Nitromethane                                                                      | 4.95  | 5.08  | -0.13 |
| Nitrophenylmethane                                                                | 14.53 | 14.69 | -0.16 |
| N-Methyl-1,2-ethylenediamine                                                      | 9.20  | 9.07  | 0.13  |
| N-Methyl-2-furanmethanamine                                                       | 12.49 | 12.60 | -0.11 |
| N-Methyl-2-pyrrolidone                                                            | 10.69 | 10.68 | 0.01  |
| N-Methylalanine ethylester                                                        | 13.71 | 13.88 | -0.17 |
| N-Methylaniline                                                                   | 14.06 | 14.07 | -0.01 |
| N-Methylbenzaldehydeimine                                                         | 15.62 | 15.61 | 0.01  |
| N-Methylbenzeneethanamine                                                         | 17.41 | 17.44 | -0.03 |
| N-Methylcyclohexylamine                                                           | 14.08 | 14.17 | -0.09 |
| N-Methyldiphenylamine                                                             | 24.33 | 24.20 | 0.13  |
| N-Methylformamide                                                                 | 6.01  | 5.93  | 0.08  |
| N-Methylformanilide                                                               | 15.80 | 16.06 | -0.26 |
| N-Methylmorpholine                                                                | 11.52 | 11.38 | 0.14  |
| N-Methyl-m-toluidine                                                              | 15.98 | 15.98 | 0.00  |
| N-Methyl-N-(2,3-dihydroxypropyl)pyrrolidinium bis(trifluoromethanesulfonyl) amide | 29.68 | 29.76 | -0.08 |
| N-Methyl-N-phenyl-difluoroacetamide                                               | 17.65 | 17.80 | -0.15 |
| N-Methyl-o-toluidine                                                              | 16.11 | 15.98 | 0.13  |
| N-Methylpiperidine                                                                | 12.59 | 12.54 | 0.05  |
| N-Methylpropargylamine                                                            | 8.70  | 8.73  | -0.03 |

|                                                |       |       |       |
|------------------------------------------------|-------|-------|-------|
| N-Methylpropionamide                           | 9.68  | 9.55  | 0.13  |
| N-Methylpyrrolidine                            | 10.53 | 10.71 | -0.18 |
| N-Nitrosodibutylamine                          | 18.62 | 18.65 | -0.03 |
| N-Nitrosodiethylamine                          | 11.29 | 11.31 | -0.02 |
| N-Nitrosodihexylamine                          | 25.98 | 26.00 | -0.02 |
| N-Nitrosodimethylamine                         | 7.65  | 7.67  | -0.02 |
| N-Nitrosodipentylamine                         | 22.28 | 22.33 | -0.05 |
| N-Nitrosodipropylamine                         | 14.95 | 14.98 | -0.03 |
| N-Nitroso-N-methyl-N-butylamine                | 13.16 | 13.16 | 0.00  |
| N-Nitroso-N-methyl-N-isobutylamine             | 13.18 | 13.15 | 0.03  |
| N-Nitroso-N-methyl-N-isopropylamine            | 11.29 | 11.30 | -0.01 |
| N-Nitroso-N-methyl-N-propylamine               | 11.32 | 11.33 | -0.01 |
| N-Nitrosopiperidine                            | 12.38 | 12.30 | 0.08  |
| N-Nitrosopyrrolidine                           | 10.54 | 10.46 | 0.08  |
| n-Nonanal                                      | 17.53 | 17.57 | -0.04 |
| n-Nonylamine                                   | 18.74 | 18.73 | 0.01  |
| n-Nonylformate                                 | 20.16 | 19.95 | 0.21  |
| n-Nonylmercaptan                               | 20.47 | 20.41 | 0.06  |
| n-Octanoic acid                                | 16.23 | 16.17 | 0.06  |
| N-Octyl-2-pyrrolidone                          | 23.47 | 23.51 | -0.04 |
| n-Octylacetate                                 | 19.65 | 19.90 | -0.25 |
| n-Octylamine                                   | 16.88 | 16.89 | -0.01 |
| n-Octylformate                                 | 18.18 | 18.11 | 0.07  |
| N-Octyl-N-methylmorpholinium N-acetylalaninate | 36.79 | 36.92 | -0.13 |
| N-Octyl-N-methylmorpholinium N-acetylvalinate  | 40.48 | 40.58 | -0.10 |
| Nonacosane                                     | 54.18 | 54.07 | 0.11  |
| Nonadecane                                     | 35.78 | 35.72 | 0.06  |
| Nonadecylbenzene                               | 45.47 | 45.46 | 0.01  |
| Nonane                                         | 17.39 | 17.37 | 0.02  |
| Nonanedinitrile                                | 17.29 | 17.20 | 0.09  |
| Nonanedioic acid                               | 18.67 | 18.63 | 0.04  |
| Nonanedioyl dichloride                         | 21.70 | 21.69 | 0.01  |
| Nonyl acetate                                  | 21.54 | 21.73 | -0.19 |
| Nonyl thiocyanate                              | 22.34 | 22.32 | 0.02  |
| Nonylbenzene                                   | 26.88 | 27.10 | -0.22 |
| Nonylcyclohexane                               | 27.56 | 27.51 | 0.05  |
| Nonylcyclopentane                              | 25.72 | 25.68 | 0.04  |
| Nonyloxytrimethylsilane                        | 26.98 | 26.99 | -0.01 |
| Nopinene                                       | 17.74 | 17.37 | 0.37  |
| Norcarane                                      | 12.16 | 11.97 | 0.19  |
| Nornicotine                                    | 17.11 | 17.47 | -0.36 |
| Norpempidine                                   | 17.83 | 17.80 | 0.03  |



|                                                                  |       |       |       |
|------------------------------------------------------------------|-------|-------|-------|
| Novoldiamine                                                     | 20.43 | 20.21 | 0.22  |
| n-Pentyl-2-mercaptan                                             | 13.10 | 13.06 | 0.04  |
| N-Phenylethanolamine                                             | 16.44 | 16.45 | -0.01 |
| N-Phenyl-N-benzylbenzenemethanamine                              | 35.81 | 35.51 | 0.30  |
| N-Phenylpiperidine                                               | 20.78 | 20.70 | 0.08  |
| n-Propyl acetate                                                 | 10.67 | 10.72 | -0.05 |
| n-Propyl benzoate                                                | 18.71 | 18.62 | 0.09  |
| n-Propyl iodide                                                  | 11.44 | 11.46 | -0.02 |
| n-Propyl trifluoacetate                                          | 10.98 | 10.83 | 0.15  |
| N-Propyl-2-methylpyridinium<br>bis(trifluoromethylsulfonyl)amide | 30.24 | 30.19 | 0.05  |
| N-Propylaminotriethylsilane                                      | 22.24 | 22.19 | 0.05  |
| N-Propylaniline                                                  | 17.89 | 17.73 | 0.16  |
| n-Propylbromoacetate                                             | 13.70 | 13.79 | -0.09 |
| n-Propylchloroacetate                                            | 12.57 | 12.62 | -0.05 |
| n-Propylformate                                                  | 8.86  | 8.93  | -0.07 |
| n-Propyliodoacetate                                              | 15.75 | 15.82 | -0.07 |
| n-Propylmethacrylate                                             | 14.22 | 14.29 | -0.07 |
| n-Propylnitrate                                                  | 9.53  | 9.37  | 0.16  |
| N-Propyl-N-methylmorpholinium N-acetylalaninate                  | 27.58 | 27.75 | -0.17 |
| N-Propyl-N-methylmorpholinium N-acetylleucinate                  | 33.25 | 33.24 | 0.01  |
| N-Propyl-N-methylmorpholinium N-acetylvalinate                   | 31.32 | 31.40 | -0.08 |
| n-Propylvinylacetate                                             | 14.13 | 14.27 | -0.14 |
| N-t-Butylaminotriethylsilane                                     | 24.03 | 24.00 | 0.03  |
| N-t-Butylbenzylamine                                             | 21.11 | 21.07 | 0.04  |
| n-Undecanoic acid                                                | 21.39 | 21.67 | -0.28 |
| n-Undecylamine                                                   | 22.42 | 22.40 | 0.02  |
| n-Undecylmercaptan                                               | 24.14 | 24.08 | 0.06  |
| n-Valeraldehyde                                                  | 10.10 | 10.23 | -0.13 |
| O,O-Dibutyl butylphosphorus thioxide                             | 30.06 | 30.24 | -0.18 |
| O,O-Dibutylthiophosphoric acid                                   | 23.21 | 23.15 | 0.06  |
| O,O-Diethyl butylphosphorus thioxide                             | 22.91 | 22.90 | 0.01  |
| O,O-diethyl ethylthiophosphinate                                 | 19.18 | 19.23 | -0.05 |
| O,O-Diethyl propylphosphorus thioxide                            | 20.99 | 21.06 | -0.07 |
| O,O-Diethylthiophosphoric acid                                   | 16.04 | 15.80 | 0.24  |
| O,O-Diisobutylthiophosphoric acid                                | 23.33 | 23.11 | 0.22  |
| O,O-Diisopropylthiophosphoric acid                               | 19.72 | 19.48 | 0.24  |
| O,O-Dimethylthiophosphoric acid                                  | 12.34 | 12.11 | 0.23  |
| O,O-Dipropyl butylphosphorus thioxide                            | 26.53 | 26.57 | -0.04 |
| O,O-Dipropyl propylphosphorus thioxide                           | 24.71 | 24.73 | -0.02 |
| O,O-Dipropylthiophosphoric acid                                  | 19.83 | 19.48 | 0.35  |
| O,S-Dimethyldithiocarbonate                                      | 13.44 | 13.44 | 0.00  |

|                                       |       |       |       |
|---------------------------------------|-------|-------|-------|
| o-Cresol                              | 13.07 | 13.12 | -0.05 |
| o-Cresylacetate                       | 16.63 | 16.87 | -0.24 |
| Octadecamethyloctasiloxane            | 63.50 | 63.76 | -0.26 |
| Octadecane                            | 34.16 | 33.88 | 0.28  |
| Octadecanoyl chloride                 | 36.14 | 36.05 | 0.09  |
| Octadecyl perfluorobutyrate           | 42.71 | 42.33 | 0.38  |
| Octadecylbenzene                      | 43.72 | 43.62 | 0.10  |
| Octadecylcyclohexane                  | 44.12 | 44.03 | 0.09  |
| Octadecyltrichlorosilane              | 42.82 | 42.85 | -0.03 |
| Octafluoronaphthalene                 | 17.64 | 17.31 | 0.33  |
| Octahydroindolizine                   | 15.40 | 15.32 | 0.08  |
| Octamethylcyclotetrasiloxane          | 29.60 | 29.57 | 0.03  |
| Octamethyltrisiloxane                 | 26.73 | 26.80 | -0.07 |
| Octane                                | 15.52 | 15.53 | -0.01 |
| Octanedioic acid                      | 16.74 | 16.80 | -0.06 |
| Octanoic anhydride                    | 30.91 | 30.92 | -0.01 |
| Octanoyl chloride                     | 17.59 | 17.70 | -0.11 |
| Octodrine                             | 16.93 | 16.85 | 0.08  |
| Octyl butanoate                       | 23.61 | 23.57 | 0.04  |
| Octyl nitrite                         | 18.25 | 17.95 | 0.30  |
| Octyl octanoate                       | 31.02 | 30.91 | 0.11  |
| Octyl phenyl ether                    | 25.79 | 25.96 | -0.17 |
| Octyl propanoate                      | 21.67 | 21.73 | -0.06 |
| Octyl thiocyanate                     | 20.49 | 20.49 | 0.00  |
| Octylbenzene                          | 25.23 | 25.27 | -0.04 |
| Octylcyanide                          | 17.28 | 17.28 | 0.00  |
| Octylcyclohexane                      | 25.72 | 25.68 | 0.04  |
| Octylcyclopentane                     | 23.89 | 23.84 | 0.05  |
| Octyloxytrimethylsilane               | 25.14 | 25.15 | -0.01 |
| Octylphosphinic dichloride            | 23.13 | 23.14 | -0.01 |
| o-Cumenol                             | 16.52 | 16.78 | -0.26 |
| O-Ethyl 2-methylpropanoic imino ester | 13.93 | 13.56 | 0.37  |
| O-Ethyl 4-methylpentanoic imino ester | 16.98 | 17.23 | -0.25 |
| O-Ethyl butanoic imino ester          | 13.66 | 13.58 | 0.08  |
| O-Ethyl hexanoic imino ester          | 17.03 | 17.25 | -0.22 |
| O-Ethyl pentanoic imino ester         | 15.61 | 15.41 | 0.20  |
| O-Ethyl propanoic imino ester         | 11.83 | 11.74 | 0.09  |
| O-Hexyl S-propenylxanthate            | 26.04 | 26.26 | -0.22 |
| O-Methyl S-propenylxanthate           | 16.84 | 17.07 | -0.23 |
| Orthoformic acid trimethyl ester      | 10.05 | 10.17 | -0.12 |
| o-Toluenesulfonyl chloride            | 18.16 | 18.07 | 0.09  |
| o-Toluidine                           | 14.01 | 14.03 | -0.02 |

|                                             |       |       |       |
|---------------------------------------------|-------|-------|-------|
| o-Tolylamino(diethylamino)borane            | 25.16 | 25.10 | 0.06  |
| Oxacyclohexadecan-2-one                     | 27.88 | 28.22 | -0.34 |
| Oxalylchloride                              | 8.82  | 8.85  | -0.03 |
| Oxepane                                     | 11.76 | 11.68 | 0.08  |
| Oxetane                                     | 6.20  | 6.18  | 0.02  |
| Oxirane                                     | 4.36  | 4.34  | 0.02  |
| Oxiranecarboxaldehyde                       | 6.43  | 6.39  | 0.04  |
| Palmitic acid                               | 31.07 | 30.85 | 0.22  |
| Paracetamol                                 | 16.76 | 16.70 | 0.06  |
| Paramethadione                              | 14.91 | 14.93 | -0.02 |
| Parasorbic acid                             | 11.57 | 11.63 | -0.06 |
| Pargyline                                   | 20.37 | 20.48 | -0.11 |
| Patchouli alcohol                           | 26.30 | 26.31 | -0.01 |
| p-Cresol                                    | 13.03 | 13.12 | -0.09 |
| p-Cymene                                    | 17.97 | 17.98 | -0.01 |
| Pelargonic acid                             | 18.06 | 18.00 | 0.06  |
| Pelletierine                                | 16.18 | 16.10 | 0.08  |
| Pempidine                                   | 19.46 | 19.83 | -0.37 |
| Pentachloroethane                           | 14.10 | 14.18 | -0.08 |
| Pentacosane                                 | 46.81 | 46.73 | 0.08  |
| Pentadecane                                 | 28.39 | 28.38 | 0.01  |
| Pentadecanedioic acid                       | 29.60 | 29.65 | -0.05 |
| Pentadecylamine                             | 29.78 | 29.74 | 0.04  |
| Pentadecylbenzene                           | 38.11 | 38.11 | 0.00  |
| Pentadecylcyclohexane                       | 38.60 | 38.53 | 0.07  |
| Pentaerythritol tetrakis(2-mercaptoacetate) | 39.26 | 39.64 | -0.38 |
| Pentaethylbenzene                           | 28.99 | 29.22 | -0.23 |
| Pentafluoroanisole                          | 12.99 | 12.90 | 0.09  |
| Pentafluorobenzene                          | 10.45 | 10.31 | 0.14  |
| Pentafluorophenol                           | 10.69 | 11.02 | -0.33 |
| Pentamethylbenzene                          | 19.70 | 20.05 | -0.35 |
| Pentane                                     | 10.02 | 10.02 | 0.00  |
| Pentanedinitrile                            | 9.88  | 9.86  | 0.02  |
| Pentanedioic acid                           | 11.23 | 11.29 | -0.06 |
| Pentanedioyl dichloride                     | 14.19 | 14.35 | -0.16 |
| Pentanenitrile                              | 9.91  | 9.94  | -0.03 |
| Pentanoic acid                              | 10.65 | 10.66 | -0.01 |
| Pentanoic anhydride                         | 20.10 | 19.91 | 0.19  |
| Pentasilane                                 | 24.10 | 24.09 | 0.01  |
| Pentyl 1-naphthaleneacetate                 | 31.11 | 31.24 | -0.13 |
| Pentyl 1-naphthoate                         | 29.58 | 29.41 | 0.17  |
| Pentyl 1-naphthylketone                     | 28.85 | 28.82 | 0.03  |

|                                            |       |       |       |
|--------------------------------------------|-------|-------|-------|
| Pentyl 2-naphthaleneacetate                | 31.22 | 31.24 | -0.02 |
| Pentyl 2-naphthoate                        | 29.81 | 29.41 | 0.40  |
| Pentyl 2-thiophenecarboxylate              | 21.89 | 21.68 | 0.21  |
| Pentyl benzoate                            | 22.43 | 22.29 | 0.14  |
| Pentyl butyrate                            | 17.93 | 18.06 | -0.13 |
| Pentyl cyclohexyloxy dithiophosphinic acid | 30.54 | 30.52 | 0.02  |
| Pentyl dichloro phosphorus oxide           | 17.38 | 17.26 | 0.12  |
| Pentyl dichloro phosphorus thioxide        | 20.47 | 20.55 | -0.08 |
| Pentyl ethoxy dithiophosphinic acid        | 24.04 | 24.03 | 0.01  |
| Pentyl heptanoate                          | 23.61 | 23.57 | 0.04  |
| Pentyl hexanoate                           | 21.71 | 21.73 | -0.02 |
| Pentyl hexyloxy dithiophosphinic acid      | 31.44 | 31.37 | 0.07  |
| Pentyl hydroperoxide                       | 11.52 | 11.51 | 0.01  |
| Pentyl isopropoxy dithiophosphinic acid    | 25.94 | 25.87 | 0.07  |
| Pentyl methoxy dithiophosphinic acid       | 22.25 | 22.18 | 0.07  |
| Pentyl nitrite                             | 12.34 | 12.44 | -0.10 |
| Pentyl nonanoate                           | 27.59 | 27.24 | 0.35  |
| Pentyl octanoate                           | 25.29 | 25.40 | -0.11 |
| Pentyl pentanoate                          | 19.86 | 19.90 | -0.04 |
| Pentyl phenyl sulfide                      | 23.08 | 23.05 | 0.03  |
| Pentyl propoxy dithiophosphinic acid       | 25.99 | 25.86 | 0.13  |
| Pentyl salicylate                          | 23.05 | 22.99 | 0.06  |
| Pentylcyclohexane                          | 20.20 | 20.17 | 0.03  |
| Pentylcyclopentane                         | 18.36 | 18.34 | 0.02  |
| Pentyldichloroborane                       | 15.65 | 15.62 | 0.03  |
| Pentyloxybenzene                           | 20.47 | 20.45 | 0.02  |
| Pentyloxytrimethylsilane                   | 19.63 | 19.65 | -0.02 |
| Pentylphosphinic dichloride                | 17.76 | 17.63 | 0.13  |
| Pentyltrichlorosilane                      | 19.34 | 18.99 | 0.35  |
| Peonol                                     | 17.99 | 17.65 | 0.34  |
| Perchlorocyclopentadiene                   | 20.75 | 20.64 | 0.11  |
| Perchlorocyclopentene                      | 24.42 | 24.45 | -0.03 |
| Perfluoro-2-methylpentane                  | 12.51 | 12.44 | 0.07  |
| Perfluorobutanoic acid                     | 9.46  | 9.24  | 0.22  |
| Perfluorocyclobutene                       | 7.45  | 7.48  | -0.03 |
| Perfluorocyclohexene                       | 11.42 | 11.46 | -0.04 |
| Perfluoroheptane                           | 14.63 | 14.67 | -0.04 |
| Perfluorohexane                            | 12.52 | 12.68 | -0.16 |
| Perfluoromethylcyclohexane                 | 13.85 | 13.65 | 0.20  |
| Perfluorotoluene                           | 12.65 | 12.33 | 0.32  |
| Perfluoro-trans-decalin                    | 18.49 | 18.59 | -0.10 |
| Perfluorotributylamine                     | 25.67 | 25.78 | -0.11 |

|                                                             |       |       |       |
|-------------------------------------------------------------|-------|-------|-------|
| Perfluorotripropylamine                                     | 19.83 | 19.82 | 0.01  |
| Perhydrofluorene                                            | 22.03 | 22.10 | -0.07 |
| Perhydrophenanthrene                                        | 23.80 | 23.93 | -0.13 |
| Perillaldehyde                                              | 18.38 | 18.40 | -0.02 |
| Phenanthrene                                                | 24.47 | 24.75 | -0.28 |
| Phenethyl alcohol                                           | 14.72 | 14.81 | -0.09 |
| Phenethyl propionate                                        | 20.20 | 20.45 | -0.25 |
| Pheniramine                                                 | 30.19 | 30.18 | 0.01  |
| Phenol                                                      | 11.12 | 11.21 | -0.09 |
| Phenoxyacetylene                                            | 13.83 | 14.17 | -0.34 |
| Phenoxytriethylsilane                                       | 25.56 | 25.59 | -0.03 |
| Phenoxytrimethylsilane                                      | 20.28 | 20.16 | 0.12  |
| Phenoxytripropylsilane                                      | 31.08 | 31.10 | -0.02 |
| Phenyl 2-tolyl propoxyborine                                | 30.57 | 30.54 | 0.03  |
| Phenyl chloroacetate                                        | 16.70 | 16.86 | -0.16 |
| Phenyl chlorofluorophosphate                                | 15.90 | 15.97 | -0.07 |
| Phenyl di(sec-butoxy)borine                                 | 28.32 | 28.40 | -0.08 |
| Phenyl di(sec-octoxy)borine                                 | 43.03 | 43.08 | -0.05 |
| Phenyl dibutoxyborine                                       | 28.27 | 28.39 | -0.12 |
| Phenyl diethoxyborine                                       | 20.96 | 21.05 | -0.09 |
| Phenyl diisobutoxyborine                                    | 28.32 | 28.36 | -0.04 |
| Phenyl dimethoxyborine                                      | 17.22 | 17.35 | -0.13 |
| Phenyl dipropoxyborine                                      | 24.74 | 24.72 | 0.02  |
| Phenyl ethoxy 2-(ethoxycarbonyl)propyl phosphorus oxide     | 29.71 | 29.66 | 0.05  |
| Phenyl ethoxy 2-(methoxycarbonyl)ethyl phosphorus oxide     | 26.06 | 25.99 | 0.07  |
| Phenyl ethoxy 2-(methoxycarbonyl)propyl phosphorus oxide    | 27.96 | 27.81 | 0.15  |
| Phenyl ethoxy 2-(propoxycarbonyl)propyl phosphorus oxide    | 31.45 | 31.49 | -0.04 |
| Phenyl hexoxy 2-(methoxycarbonyl)propyl phosphorus oxide    | 35.37 | 35.15 | 0.22  |
| Phenyl isobutoxy 2-(methoxycarbonyl)propyl phosphorus oxide | 31.54 | 31.47 | 0.07  |
| Phenyl n-propyl sulfide                                     | 19.44 | 19.38 | 0.06  |
| Phenyl O-ethyl phosphonic acid                              | 18.48 | 18.42 | 0.06  |
| Phenyl O-heptyl phosphonic acid                             | 27.48 | 27.60 | -0.12 |
| Phenyl O-hexyl phosphonic acid                              | 25.52 | 25.77 | -0.25 |
| Phenyl O-isobutyl phosphonic acid                           | 21.94 | 22.08 | -0.14 |
| Phenyl O-isopropyl phosphonic acid                          | 20.03 | 20.26 | -0.23 |
| Phenyl O-methyl phosphonic acid                             | 16.30 | 16.58 | -0.28 |
| Phenyl O-nonyl phosphonic acid                              | 31.24 | 31.27 | -0.03 |

|                                   |       |       |       |
|-----------------------------------|-------|-------|-------|
| Phenyl O-octyl phosphonic acid    | 29.33 | 29.44 | -0.11 |
| Phenyl propanoate                 | 16.72 | 16.80 | -0.08 |
| Phenyl vinyl ether                | 14.88 | 14.66 | 0.22  |
| Phenyl-2-thienylmethanone         | 21.99 | 21.66 | 0.33  |
| Phenylacetaldehyde                | 14.22 | 14.46 | -0.24 |
| Phenylacetate                     | 14.81 | 14.96 | -0.15 |
| Phenylacetone                     | 16.05 | 16.20 | -0.15 |
| Phenylacetonitrile                | 13.86 | 14.17 | -0.31 |
| Phenylacetyl chloride             | 16.27 | 16.42 | -0.15 |
| Phenylamino(diethylamino)borane   | 23.33 | 23.19 | 0.14  |
| Phenylbis(2-methylallyl)phosphine | 29.00 | 29.04 | -0.04 |
| Phenylboron dichloride            | 16.51 | 16.38 | 0.13  |
| Phenylchloroacetylene             | 15.76 | 15.81 | -0.05 |
| Phenylcyclohexane                 | 20.91 | 20.73 | 0.18  |
| Phenyldiallylphosphine            | 25.06 | 25.31 | -0.25 |
| Phenyldibutylcarbinol             | 27.50 | 27.64 | -0.14 |
| Phenyldichlorofluoromethane       | 16.37 | 16.26 | 0.11  |
| Phenylisocyanate                  | 13.46 | 13.30 | 0.16  |
| Phenylphosphine                   | 14.50 | 14.33 | 0.17  |
| Phenylphosphorous diaziridide     | 23.30 | 23.35 | -0.05 |
| Phenylpropylboronic acid          | 18.39 | 18.31 | 0.08  |
| Phenylpropylboronic anhydride     | 35.79 | 36.09 | -0.30 |
| Phenylpropylether                 | 16.80 | 16.78 | 0.02  |
| Phenylsilane                      | 14.84 | 14.70 | 0.14  |
| Phenyltri(2-octyloxy)silane       | 59.39 | 59.40 | -0.01 |
| Phenyltri(cyclohexyloxy)silane    | 45.86 | 45.84 | 0.02  |
| Phenyltrichlorosilane             | 19.39 | 19.55 | -0.16 |
| Phenyltrifluorosilane             | 13.12 | 13.17 | -0.05 |
| Phenyltriisopentyloxysilane       | 42.91 | 42.82 | 0.09  |
| Phenyltrimethylsilane             | 19.77 | 19.90 | -0.13 |
| Phlorol                           | 14.90 | 14.96 | -0.06 |
| Phosphamidon                      | 27.41 | 27.07 | 0.34  |
| Phosphoric acid                   | 4.86  | 5.12  | -0.26 |
| Phosphoric acid ethylester        | 8.97  | 8.97  | 0.00  |
| Phthaloyl chloride                | 18.70 | 18.65 | 0.05  |
| Phytol                            | 37.86 | 38.01 | -0.15 |
| Pimelonitrile                     | 13.64 | 13.53 | 0.11  |
| Pinacolone                        | 11.91 | 11.96 | -0.05 |
| Piperidine                        | 10.60 | 10.51 | 0.09  |
| Piperitenone                      | 18.80 | 18.39 | 0.41  |
| Piperitone                        | 18.52 | 18.38 | 0.14  |
| p-Isopropenylisopropylbenzene     | 21.75 | 21.56 | 0.19  |

|                                        |       |       |       |
|----------------------------------------|-------|-------|-------|
| Pivalaldehyde                          | 9.96  | 10.22 | -0.26 |
| Pivalic acid chloride                  | 11.90 | 12.18 | -0.28 |
| Pivalone                               | 17.29 | 17.46 | -0.17 |
| Pivalonitrile                          | 10.00 | 9.93  | 0.07  |
| Pivalophenone                          | 19.93 | 19.86 | 0.07  |
| Placidyl                               | 15.06 | 15.21 | -0.15 |
| p-Menthadiene                          | 18.02 | 18.19 | -0.17 |
| p-Menthane                             | 18.36 | 18.31 | 0.05  |
| Prehnitene                             | 17.88 | 18.14 | -0.26 |
| Pristane                               | 35.79 | 35.66 | 0.13  |
| Propanal                               | 6.43  | 6.56  | -0.13 |
| Propanal oxime                         | 8.06  | 8.14  | -0.08 |
| Propanamide                            | 7.59  | 7.60  | -0.01 |
| Propandioic acid                       | 7.56  | 7.62  | -0.06 |
| Propane                                | 6.29  | 6.35  | -0.06 |
| Propane-1,2-dinitrite                  | 11.33 | 11.19 | 0.14  |
| Propane-1,2-dithiol                    | 12.31 | 12.43 | -0.12 |
| Propane-1,3-dithiol                    | 12.48 | 12.44 | 0.04  |
| Propanedioyl dichloride                | 10.62 | 10.68 | -0.06 |
| Propanenitrile                         | 6.25  | 6.27  | -0.02 |
| Propanoic acid                         | 6.90  | 6.99  | -0.09 |
| Propanoic anhydride                    | 12.47 | 12.57 | -0.10 |
| Propanolamine                          | 8.33  | 8.27  | 0.06  |
| Propanone                              | 6.46  | 6.46  | 0.00  |
| Propanoyl chloride                     | 8.41  | 8.52  | -0.11 |
| Propargyl acetate                      | 9.83  | 9.91  | -0.08 |
| Propargyl aldehyde                     | 5.72  | 5.75  | -0.03 |
| Propargyl propionate                   | 11.65 | 11.75 | -0.10 |
| Propargylamine                         | 7.28  | 6.91  | 0.37  |
| Propenal                               | 6.44  | 6.44  | 0.00  |
| Propham                                | 20.41 | 20.32 | 0.09  |
| Propiolic acid                         | 6.31  | 6.18  | 0.13  |
| Propoxyacetylene                       | 9.86  | 9.93  | -0.07 |
| Propoxydichloromethylsulfenyl chloride | 17.99 | 18.02 | -0.03 |
| Propyl 1-naphthaleneacetate            | 27.45 | 27.57 | -0.12 |
| Propyl 1-naphthoate                    | 25.86 | 25.74 | 0.12  |
| Propyl 1-naphthylketone                | 25.10 | 25.15 | -0.05 |
| Propyl 2-hydroxybenzoate               | 19.65 | 19.32 | 0.33  |
| Propyl 2-naphthaleneacetate            | 27.58 | 27.57 | 0.01  |
| Propyl 2-naphthoate                    | 26.11 | 25.74 | 0.37  |
| Propyl 2-thiophenecarboxylate          | 18.21 | 18.01 | 0.20  |
| Propyl 3-chloropropanoate              | 14.44 | 14.46 | -0.02 |

|                                                |       |       |       |
|------------------------------------------------|-------|-------|-------|
| Propyl 4-toluenesulfonate                      | 21.83 | 21.87 | -0.04 |
| Propyl butyrate                                | 14.33 | 14.39 | -0.06 |
| Propyl chloroformate                           | 10.89 | 10.87 | 0.02  |
| Propyl dichloroacetate                         | 14.61 | 14.55 | 0.06  |
| Propyl hexanoate                               | 18.19 | 18.06 | 0.13  |
| Propyl hydrocinnamate                          | 22.12 | 22.29 | -0.17 |
| Propyl isobutanoate                            | 14.00 | 14.37 | -0.37 |
| Propyl isocyanate                              | 8.95  | 9.16  | -0.21 |
| Propyl isothiocyanate                          | 12.23 | 12.16 | 0.07  |
| Propyl isovalerate                             | 16.19 | 16.21 | -0.02 |
| Propyl N,N-diethylamino phosphorusoxy chloride | 20.20 | 20.15 | 0.05  |
| Propyl N,N-diethylamino phosphorusoxy fluoride | 17.79 | 17.79 | 0.00  |
| Propyl nitrite                                 | 8.81  | 8.77  | 0.04  |
| Propyl octanoate                               | 21.54 | 21.73 | -0.19 |
| Propyl phenylacetate                           | 20.30 | 20.45 | -0.15 |
| Propyl phosphorusoxy dichloride                | 13.64 | 13.58 | 0.06  |
| Propyl propanoate                              | 12.49 | 12.55 | -0.06 |
| Propyl propylxanthate                          | 20.89 | 20.88 | 0.01  |
| Propyl thiocyanate                             | 11.25 | 11.31 | -0.06 |
| Propyl trichloroacetate                        | 16.56 | 16.55 | 0.01  |
| Propyl valerate                                | 16.16 | 16.22 | -0.06 |
| Propyl vinyl ether                             | 10.57 | 10.42 | 0.15  |
| Propylallene                                   | 11.72 | 11.84 | -0.12 |
| Propylammonium nitrate                         | 11.41 | 11.39 | 0.02  |
| Propylbenzenesulfonate                         | 19.90 | 19.96 | -0.06 |
| Propylbutoxyphosphinic chloride                | 17.87 | 17.87 | 0.00  |
| Propylcyclohexane                              | 16.52 | 16.50 | 0.02  |
| Propylcyclohexylketone                         | 18.57 | 18.44 | 0.13  |
| Propylcyclopentane                             | 14.70 | 14.67 | 0.03  |
| Propylene                                      | 6.26  | 6.23  | 0.03  |
| Propylenecarbonate                             | 8.48  | 8.62  | -0.14 |
| Propylenediamine                               | 8.92  | 9.05  | -0.13 |
| Propyleneglycol dinitrate                      | 12.28 | 12.40 | -0.12 |
| Propylhexedrine                                | 19.83 | 19.66 | 0.17  |
| Propyliodoacetylene                            | 14.18 | 14.27 | -0.09 |
| Propylisobutoxyphosphinic chloride             | 17.73 | 17.85 | -0.12 |
| Propylisopropoxyphosphinic chloride            | 16.09 | 16.04 | 0.05  |
| Propylphosphonyl difluoride                    | 9.36  | 9.39  | -0.03 |
| Propylpropoxyphosphinic chloride               | 15.98 | 16.03 | -0.05 |
| Propylsulfinyl chloride                        | 12.11 | 12.04 | 0.07  |
| Propylsulfonyl fluoride                        | 9.80  | 10.17 | -0.37 |
| Propyltrichlorosilane                          | 15.25 | 15.32 | -0.07 |



|                                                                       |       |       |       |
|-----------------------------------------------------------------------|-------|-------|-------|
| Propyltriisothiocyanatosilane                                         | 27.23 | 27.39 | -0.16 |
| Pseudopelletierine                                                    | 17.11 | 17.25 | -0.14 |
| p-Toluidine                                                           | 14.14 | 14.03 | 0.11  |
| Pulegone                                                              | 18.57 | 18.42 | 0.15  |
| p-Xylyldiallylphosphine                                               | 28.93 | 29.13 | -0.20 |
| Pyrazine                                                              | 8.98  | 8.69  | 0.29  |
| Pyrene                                                                | 28.77 | 28.37 | 0.40  |
| Pyridazine                                                            | 8.77  | 8.78  | -0.01 |
| Pyridine                                                              | 9.54  | 9.60  | -0.06 |
| Pyrimidine                                                            | 8.53  | 8.44  | 0.09  |
| Pyrrole                                                               | 8.18  | 8.40  | -0.22 |
| Pyrrolidine                                                           | 8.71  | 8.68  | 0.03  |
| Pyrvaldehyde                                                          | 6.63  | 6.67  | -0.04 |
| Pyruvic acid                                                          | 7.32  | 7.10  | 0.22  |
| Quinoline                                                             | 16.53 | 16.57 | -0.04 |
| R-11                                                                  | 22.57 | 22.83 | -0.26 |
| Refrigerant 115                                                       | 6.58  | 6.60  | -0.02 |
| Refrigerant 216                                                       | 10.51 | 10.45 | 0.06  |
| Rhodinol                                                              | 19.68 | 19.65 | 0.03  |
| Ricinelaidic acid                                                     | 35.03 | 35.00 | 0.03  |
| Safranal                                                              | 18.84 | 18.45 | 0.39  |
| Safrole                                                               | 18.29 | 18.39 | -0.10 |
| s-Butyl ethyl ether                                                   | 12.51 | 12.53 | -0.02 |
| s-Butyl pentanoate                                                    | 17.95 | 18.06 | -0.11 |
| s-Butyl propionate                                                    | 14.30 | 14.39 | -0.09 |
| s-Butylacetate                                                        | 12.44 | 12.56 | -0.12 |
| s-Butylbenzene                                                        | 17.85 | 17.91 | -0.06 |
| S-Butyl-dimethylthioformamidium<br>bis(trifluoromethylsulfonyl) amide | 31.42 | 31.32 | 0.10  |
| S-Butyl-dimethylthioformamidium<br>difluorooxalylborate               | 25.14 | 25.01 | 0.13  |
| s-Butylethylamine                                                     | 13.27 | 13.17 | 0.10  |
| s-Butylformate                                                        | 10.76 | 10.77 | -0.01 |
| s-Butylmethylether                                                    | 10.61 | 10.69 | -0.08 |
| s-Butylnitrate                                                        | 11.19 | 11.21 | -0.02 |
| s-Butylnitrite                                                        | 10.62 | 10.61 | 0.01  |
| s-Butyl-t-butylether                                                  | 15.99 | 16.19 | -0.20 |
| Sebaconitrile                                                         | 19.07 | 19.04 | 0.03  |
| sec-Amyl acetate                                                      | 14.25 | 14.39 | -0.14 |
| sec-Butyl hydroperoxide                                               | 9.63  | 9.68  | -0.05 |
| S-Ethyl thioacetate                                                   | 11.51 | 11.46 | 0.05  |

|                                                                     |       |       |       |
|---------------------------------------------------------------------|-------|-------|-------|
| S-Ethyl-dimethylthioformamidium bis(trifluoromethylsulfonyl) amide  | 27.68 | 27.65 | 0.03  |
| S-Ethyl-dimethylthioformamidium difluorooxalylborate                | 21.35 | 21.34 | 0.01  |
| S-Ethyl-dimethylthioformamidium trifluoromethylsulfonate            | 21.25 | 20.99 | 0.26  |
| S-Methyl-dimethylthioformamidium bis(trifluoromethylsulfonyl) amide | 25.75 | 25.73 | 0.02  |
| S-Methyl-dimethylthioformamidium trifluoromethylsulfonate           | 19.15 | 19.07 | 0.08  |
| Solanone                                                            | 24.95 | 24.61 | 0.34  |
| Sorbic alcohol                                                      | 12.72 | 12.26 | 0.46  |
| Sparteine                                                           | 28.20 | 27.93 | 0.27  |
| s-Phenethyl alcohol                                                 | 14.69 | 14.82 | -0.13 |
| Spiro[5.5]undecane                                                  | 19.28 | 19.33 | -0.05 |
| S-Propylthioacetate                                                 | 13.27 | 13.30 | -0.03 |
| Squalene                                                            | 55.69 | 55.60 | 0.09  |
| S-sec-Butyl thioacetate                                             | 15.18 | 15.13 | 0.05  |
| S-t-Butyl thiolacetate                                              | 15.15 | 15.28 | -0.13 |
| Stearic acid                                                        | 34.47 | 34.52 | -0.05 |
| Stearyl mercaptan                                                   | 37.02 | 36.92 | 0.10  |
| Styrene                                                             | 14.46 | 14.13 | 0.33  |
| Styrene oxide                                                       | 14.12 | 14.08 | 0.04  |
| Suberone                                                            | 12.83 | 12.95 | -0.12 |
| Suberonitrile                                                       | 15.28 | 15.36 | -0.08 |
| Succinonitrile                                                      | 8.10  | 8.02  | 0.08  |
| Succinyl chloride                                                   | 12.43 | 12.52 | -0.09 |
| Sucrose octaacetate                                                 | 58.21 | 57.96 | 0.25  |
| Sulcatol                                                            | 16.00 | 16.04 | -0.04 |
| Sulcatone                                                           | 15.56 | 15.59 | -0.03 |
| Sulfolane                                                           | 10.70 | 10.81 | -0.11 |
| Sulfotep                                                            | 30.09 | 30.39 | -0.30 |
| t-Amyl mercaptan                                                    | 13.37 | 13.21 | 0.16  |
| t-Amyl t-butyl disulfide                                            | 23.91 | 24.05 | -0.14 |
| t-Amylhydroperoxide                                                 | 11.48 | 11.49 | -0.01 |
| t-Butoxytriethylsilane                                              | 23.21 | 23.23 | -0.02 |
| t-Butoxytrimethylsilane                                             | 17.83 | 17.79 | 0.04  |
| t-Butoxytripropylsilane                                             | 28.81 | 28.73 | 0.08  |
| t-Butyl acrylate                                                    | 14.35 | 14.25 | 0.10  |
| t-Butyl isocyanate                                                  | 11.13 | 10.97 | 0.16  |
| t-Butyl vinyl ether                                                 | 12.30 | 12.23 | 0.07  |
| t-Butylacetate                                                      | 12.47 | 12.53 | -0.06 |
| t-Butylacetylene                                                    | 11.22 | 11.04 | 0.18  |

|                                                                     |       |       |       |
|---------------------------------------------------------------------|-------|-------|-------|
| t-Butylamine                                                        | 9.62  | 9.52  | 0.10  |
| t-Butylbenzene                                                      | 17.83 | 17.92 | -0.09 |
| t-Butylcyclohexane                                                  | 18.28 | 18.33 | -0.05 |
| t-Butylformamide                                                    | 11.54 | 11.40 | 0.14  |
| t-Butylformate                                                      | 10.73 | 10.75 | -0.02 |
| t-Butylhydroperoxide                                                | 9.70  | 9.65  | 0.05  |
| t-Butylmercaptan                                                    | 11.46 | 11.38 | 0.08  |
| t-Butylnitrite                                                      | 10.61 | 10.59 | 0.02  |
| t-Butyl-t-amylperoxide                                              | 18.99 | 18.96 | 0.03  |
| TEPP                                                                | 24.47 | 24.42 | 0.05  |
| Terpinen-4-ol                                                       | 18.71 | 18.83 | -0.12 |
| Terpinolene                                                         | 18.04 | 18.28 | -0.24 |
| tert-Butyl 3-oxobutanoate                                           | 16.20 | 16.31 | -0.11 |
| Tetra(1H,1H,3H-perfluoropropyl)silicate                             | 28.62 | 28.58 | 0.04  |
| Tetra(1H,1H,5H-perfluoropentyl)silicate                             | 44.38 | 44.47 | -0.09 |
| Tetra(2-ethylbutyl) silicate                                        | 49.76 | 50.11 | -0.35 |
| Tetra(diethylamino)silane                                           | 38.58 | 38.74 | -0.16 |
| Tetra(dimethylamino)silane                                          | 24.30 | 24.18 | 0.12  |
| Tetra-2-butoxysilane                                                | 35.87 | 35.51 | 0.36  |
| Tetra-2-methyl-1-propoxysilane                                      | 35.23 | 35.43 | -0.20 |
| Tetra-2-pentoxysilane                                               | 43.20 | 42.85 | 0.35  |
| Tetra-3-methyl-1-butoxysilane                                       | 42.51 | 42.77 | -0.26 |
| Tetrabutoxysilane                                                   | 35.23 | 35.49 | -0.26 |
| Tetrabutylphosphonium acetate                                       | 38.54 | 38.58 | -0.04 |
| Tetrabutylphosphonium formate                                       | 37.09 | 36.88 | 0.21  |
| Tetrabutylphosphonium propanoate                                    | 40.50 | 40.42 | 0.08  |
| Tetracene                                                           | 32.27 | 31.87 | 0.40  |
| Tetrachloroethylene                                                 | 12.03 | 12.13 | -0.10 |
| Tetrachlorothiophene                                                | 17.46 | 17.47 | -0.01 |
| Tetracosamethylhendecasiloxane                                      | 86.12 | 85.94 | 0.18  |
| Tetracosane                                                         | 44.83 | 44.90 | -0.07 |
| Tetracosanoic acid                                                  | 45.88 | 45.53 | 0.35  |
| Tetradecamethylcycloheptasiloxane                                   | 51.86 | 51.75 | 0.11  |
| Tetradecamethylhexasiloxane                                         | 48.94 | 48.98 | -0.04 |
| Tetradecane                                                         | 26.69 | 26.54 | 0.15  |
| Tetradecanoic acid                                                  | 27.13 | 27.18 | -0.05 |
| Tetradecanoic anhydride                                             | 53.22 | 52.95 | 0.27  |
| Tetradecyl trihexylphosphonium<br>bis(trifluoromethylsulfonyl)amide | 76.33 | 76.33 | 0.00  |
| Tetradecyl trihexylphosphonium chloride                             | 65.93 | 66.10 | -0.17 |
| Tetradecylbenzene                                                   | 36.27 | 36.28 | -0.01 |
| Tetradecylcyclohexane                                               | 36.75 | 36.69 | 0.06  |

|                                          |       |       |       |
|------------------------------------------|-------|-------|-------|
| Tetraethoxymethane                       | 19.69 | 19.76 | -0.07 |
| Tetraethoxysilane                        | 21.14 | 20.81 | 0.33  |
| Tetraethylmethane                        | 17.09 | 17.36 | -0.27 |
| Tetraethylsilane                         | 19.17 | 19.27 | -0.10 |
| Tetraethylurea                           | 19.87 | 19.99 | -0.12 |
| Tetraglycol                              | 18.61 | 18.66 | -0.05 |
| Tetrahexoxysilane                        | 50.54 | 50.18 | 0.36  |
| Tetrahydro-2,5-dimethoxyfuran            | 12.94 | 12.87 | 0.07  |
| Tetrahydro-2H-pyran-2-methanol           | 12.23 | 12.24 | -0.01 |
| Tetrahydro-2H-pyran-2-one                | 9.63  | 9.87  | -0.24 |
| Tetrahydro-3-furanol                     | 8.61  | 8.57  | 0.04  |
| Tetrahydro-3-methyl-2H-thiopyran         | 14.12 | 14.14 | -0.02 |
| Tetrahydro-4H-pyran-4-one                | 9.88  | 9.95  | -0.07 |
| Tetrahydrodicyclopentadiene              | 16.62 | 16.59 | 0.03  |
| Tetrahydrofuran                          | 7.88  | 8.01  | -0.13 |
| Tetrahydrofurfuryl acetate               | 14.04 | 14.21 | -0.17 |
| Tetrahydrofurfuryl alcohol               | 10.38 | 10.41 | -0.03 |
| Tetrahydrofurfuryl methacrylate          | 17.62 | 17.79 | -0.17 |
| Tetrahydrofurfurylamine                  | 11.16 | 11.21 | -0.05 |
| Tetrahydromyrcenol                       | 19.88 | 19.72 | 0.16  |
| Tetrahydropyran                          | 9.80  | 9.85  | -0.05 |
| Tetraisobutylsilane                      | 34.09 | 33.89 | 0.20  |
| Tetraisopropoxysilane                    | 28.07 | 28.17 | -0.10 |
| Tetraisopropylsilane                     | 26.53 | 26.69 | -0.16 |
| Tetramethyl orthocarbonate               | 12.35 | 12.37 | -0.02 |
| Tetramethylene glycol                    | 9.37  | 9.31  | 0.06  |
| Tetramethylethene                        | 11.73 | 11.84 | -0.11 |
| Tetramethyloxirane                       | 11.76 | 11.64 | 0.12  |
| Tetramethylsilane                        | 11.87 | 12.02 | -0.15 |
| Tetramethyltetraphenylcyclotetrasiloxane | 61.17 | 61.09 | 0.08  |
| Tetramethylurea                          | 12.76 | 12.71 | 0.05  |
| Tetramethoxysilane                       | 13.28 | 13.42 | -0.14 |
| Tetraoctoxysilane                        | 64.97 | 64.86 | 0.11  |
| Tetrapentoxysilane                       | 42.57 | 42.83 | -0.26 |
| Tetrapropoxymethane                      | 27.19 | 27.10 | 0.09  |
| Tetrapropoxysilane                       | 28.01 | 28.15 | -0.14 |
| Tetrasilane                              | 19.38 | 19.31 | 0.07  |
| Tetravinylsilane                         | 18.58 | 18.67 | -0.09 |
| Thiamorpholine                           | 11.77 | 11.82 | -0.05 |
| Thianaphthene                            | 16.64 | 16.34 | 0.30  |
| Thiane                                   | 12.22 | 12.32 | -0.10 |
| Thiepane                                 | 13.77 | 14.15 | -0.38 |

|                                                        |       |       |       |
|--------------------------------------------------------|-------|-------|-------|
| Thietane                                               | 8.62  | 8.65  | -0.03 |
| Thiirane                                               | 6.84  | 6.81  | 0.03  |
| Thioacetic acid                                        | 7.84  | 7.60  | 0.24  |
| Thioanisole                                            | 15.64 | 15.63 | 0.01  |
| Thioglycerol                                           | 10.58 | 10.52 | 0.06  |
| Thiolactic acid                                        | 10.03 | 10.02 | 0.01  |
| Thiolane                                               | 10.37 | 10.48 | -0.11 |
| Thiolane 1-oxide                                       | 10.77 | 10.83 | -0.06 |
| Thiophene                                              | 9.66  | 9.83  | -0.17 |
| Thiophos                                               | 28.43 | 28.21 | 0.22  |
| Thujone                                                | 17.77 | 17.56 | 0.21  |
| Tiglic acid                                            | 10.70 | 10.61 | 0.09  |
| Tiglic aldehyde                                        | 10.24 | 10.18 | 0.06  |
| t-Nonylmercaptan                                       | 20.32 | 20.55 | -0.23 |
| t-Pentylbenzene                                        | 19.62 | 19.75 | -0.13 |
| trans-(1-Methyl-1-propenyl)benzene                     | 18.06 | 17.87 | 0.19  |
| trans,trans-2,4-Hexadiene                              | 12.06 | 11.70 | 0.36  |
| trans-1,2-Bis(trimethylsilyl)-3,3-dichlorocyclopropane | 28.15 | 27.99 | 0.16  |
| trans-1,2-Dibromocyclohexane                           | 17.06 | 17.19 | -0.13 |
| trans-1,2-Dibromoethene                                | 10.53 | 10.42 | 0.11  |
| trans-1,2-Dichloroethylene                             | 8.15  | 8.16  | -0.01 |
| trans-1,2-Dichloropropene                              | 9.95  | 10.08 | -0.13 |
| trans-1,2-Dimethylcyclohexane                          | 14.72 | 14.65 | 0.07  |
| trans-1,2-Dimethylcyclopentane                         | 12.97 | 12.82 | 0.15  |
| trans-1,2-Dimethylcyclopropane                         | 9.49  | 9.14  | 0.35  |
| trans-1,2-Divinylcyclobutane                           | 14.60 | 14.41 | 0.19  |
| trans-1,3,5-Trimethylcyclohexane                       | 16.61 | 16.47 | 0.14  |
| trans-1,3-Dichloropropene                              | 10.14 | 10.04 | 0.10  |
| trans-1,3-Dimethylcyclohexane                          | 14.50 | 14.65 | -0.15 |
| trans-1,3-Dimethylcyclopentane                         | 12.97 | 12.82 | 0.15  |
| trans-1,4-Dichloro-2-butene                            | 12.05 | 11.92 | 0.13  |
| trans-1,4-Dimethylcyclohexane                          | 14.57 | 14.65 | -0.08 |
| trans-1,4-Hexadiene                                    | 11.62 | 11.66 | -0.04 |
| trans-1-Bromo-1-butene                                 | 10.94 | 11.10 | -0.16 |
| trans-1-Chloro-1-butene                                | 10.08 | 9.97  | 0.11  |
| trans-1-Chloropropene                                  | 7.96  | 8.13  | -0.17 |
| trans-1-Ethyl-2-methylcyclopentane                     | 14.77 | 14.65 | 0.12  |
| trans-1-Ethyl-3-methylcyclopentane                     | 14.73 | 14.65 | 0.08  |
| trans-1-Ethyl-4-methylcyclohexane                      | 16.59 | 16.49 | 0.10  |
| trans-1-Methyl-2-propylcyclopentane                    | 16.63 | 16.49 | 0.14  |
| trans-2,2-Dimethyl-3-hexene                            | 15.63 | 15.44 | 0.19  |

|                                              |       |       |       |
|----------------------------------------------|-------|-------|-------|
| trans-2,3-Epoxybutane                        | 8.14  | 8.02  | 0.12  |
| trans-2-Bromo-2-butene                       | 11.01 | 11.05 | -0.04 |
| trans-2-Butene                               | 8.49  | 8.11  | 0.38  |
| trans-2-Butene-1,4-diol                      | 9.20  | 9.23  | -0.03 |
| trans-2-Chloro-2-butene                      | 9.92  | 10.06 | -0.14 |
| trans-2-Hepten-1-ol                          | 14.18 | 14.18 | 0.00  |
| trans-2-Heptene                              | 13.59 | 13.62 | -0.03 |
| trans-2-Heptenoic acid                       | 14.29 | 14.25 | 0.04  |
| trans-2-Hexen-1-ol                           | 12.18 | 12.34 | -0.16 |
| trans-2-Hexen-1-ol, acetate                  | 16.12 | 16.15 | -0.03 |
| trans-2-Hexenal                              | 12.26 | 11.99 | 0.27  |
| trans-2-Hexene                               | 11.84 | 11.78 | 0.06  |
| trans-2-Methyl-1,3-pentadiene                | 12.08 | 11.69 | 0.39  |
| trans-2-Methyl-2-pentenoic acid              | 12.50 | 12.44 | 0.06  |
| trans-2-Methyl-3-hexene                      | 13.77 | 13.60 | 0.17  |
| trans-2-Methylcyclohexanol                   | 13.45 | 13.39 | 0.06  |
| trans-2-Nonenoic acid                        | 17.98 | 17.92 | 0.06  |
| trans-2-Octenal                              | 15.89 | 15.66 | 0.23  |
| trans-2-Octene                               | 15.42 | 15.45 | -0.03 |
| trans-2-Octenoic acid                        | 16.15 | 16.09 | 0.06  |
| trans-2-Penten-1-ol                          | 10.50 | 10.50 | 0.00  |
| trans-2-Pentene                              | 10.00 | 9.95  | 0.05  |
| trans-2-Pentenoic acid                       | 10.64 | 10.58 | 0.06  |
| trans-2-Undecene                             | 20.95 | 20.96 | -0.01 |
| trans-3,4-Dimethyl-2-pentene                 | 13.62 | 13.63 | -0.01 |
| trans-3,7-Dimethyl-2,6-octadien-1-ol formate | 22.02 | 21.68 | 0.34  |
| trans-3-heptene                              | 13.64 | 13.62 | 0.02  |
| trans-3-Heptenoic acid                       | 14.29 | 14.25 | 0.04  |
| trans-3-Hexene                               | 11.79 | 11.78 | 0.01  |
| trans-3-Hexenoic acid                        | 12.45 | 12.42 | 0.03  |
| trans-3-Methyl-3-hexene                      | 13.70 | 13.64 | 0.06  |
| trans-3-Methylcyclohexanol                   | 13.42 | 13.39 | 0.03  |
| trans-3-Octene                               | 15.50 | 15.45 | 0.05  |
| trans-3-Penten-1-yne                         | 9.44  | 9.14  | 0.30  |
| trans-3-Pentenitrile                         | 9.76  | 9.86  | -0.10 |
| trans-3-Phenyl-2-propen-1-ol                 | 17.00 | 16.57 | 0.43  |
| trans-4,4-Dimethyl-2-pentene                 | 13.64 | 13.61 | 0.03  |
| trans-4-Hexen-1-ol                           | 12.30 | 12.34 | -0.04 |
| trans-4-Methyl-2-hexene                      | 13.70 | 13.60 | 0.10  |
| trans-4-Methylcyclohexanol                   | 13.41 | 13.39 | 0.02  |
| trans-4-Octene                               | 15.48 | 15.45 | 0.03  |
| trans-4-Undecene                             | 20.98 | 20.96 | 0.02  |

|                                                             |       |       |       |
|-------------------------------------------------------------|-------|-------|-------|
| trans-5-Decene                                              | 19.18 | 19.12 | 0.06  |
| trans-5-Methyl-2-(1-methylvinyl)cyclohexanone               | 18.22 | 18.33 | -0.11 |
| trans-5-Methyl-2-hexene                                     | 13.73 | 13.60 | 0.13  |
| trans-5-Octenoic acid                                       | 16.01 | 16.09 | -0.08 |
| trans-5-Undecene                                            | 21.01 | 20.96 | 0.05  |
| trans-Chlorobromoethylene                                   | 9.28  | 9.29  | -0.01 |
| trans-Cinnamyl acetate                                      | 20.82 | 20.37 | 0.45  |
| trans-Citral                                                | 19.57 | 19.30 | 0.27  |
| trans-Crotonitrile                                          | 8.21  | 8.03  | 0.18  |
| trans-Cyclohexane-1,2-dinitrite                             | 15.51 | 15.86 | -0.35 |
| trans-Cyclooctene                                           | 14.48 | 14.60 | -0.12 |
| trans-Decalin                                               | 17.64 | 17.47 | 0.17  |
| trans-Geraniol                                              | 19.41 | 19.66 | -0.25 |
| trans-Hydrindan                                             | 15.69 | 15.64 | 0.05  |
| trans-Octahydro-1(2H)-naphthalenone                         | 17.54 | 17.58 | -0.04 |
| Tri(1,2,2-trimethylpropoxy)borine                           | 37.11 | 37.37 | -0.26 |
| Tri(1,3-dichloro-2-propoxy)borine                           | 32.16 | 32.29 | -0.13 |
| Tri(1-chloroethoxy)borine                                   | 21.01 | 21.21 | -0.20 |
| Tri(1-ethoxycarbonylethoxy)borine                           | 34.06 | 33.97 | 0.09  |
| Tri(1-methoxyethoxy)borine                                  | 22.76 | 22.65 | 0.11  |
| Tri(2-ethoxycarbonylethoxy)borine                           | 33.68 | 33.96 | -0.28 |
| Tri(2-pentoxy)borine                                        | 31.76 | 31.89 | -0.13 |
| Tri(butylthio)borane                                        | 34.67 | 34.63 | 0.04  |
| Tri(ethoxycarbonylmethoxy)borine                            | 28.20 | 28.45 | -0.25 |
| Tri(ethoxyethyl) phosphate                                  | 29.71 | 29.69 | 0.02  |
| Tri(methoxyethyl) phosphate                                 | 24.17 | 24.15 | 0.02  |
| Tri(propylthio)borane                                       | 29.12 | 29.12 | 0.00  |
| Tri(t-butoxy)borine                                         | 26.47 | 26.31 | 0.16  |
| Triallylamine                                               | 18.08 | 18.51 | -0.43 |
| Tribromoethylene                                            | 13.34 | 13.44 | -0.10 |
| Tributoxymethane                                            | 26.76 | 26.72 | 0.04  |
| Tributyl borate                                             | 26.42 | 26.37 | 0.05  |
| Tributyl citrate                                            | 36.53 | 36.50 | 0.03  |
| Tributyl phosphate                                          | 27.60 | 27.68 | -0.08 |
| Tributyl phosphite                                          | 27.80 | 28.11 | -0.31 |
| Tributylamine                                               | 24.42 | 24.39 | 0.03  |
| Tributylisothiocyanatosilane                                | 32.52 | 32.35 | 0.17  |
| Tributylmethylammonium<br>bis(trifluoromethylsulfonyl)amide | 38.68 | 38.66 | 0.02  |
| Tributylphosphine                                           | 27.15 | 27.05 | 0.10  |
| Tributylsilane                                              | 26.76 | 26.62 | 0.14  |
| Tributylsilanol                                             | 26.87 | 26.94 | -0.07 |

|                                      |       |       |       |
|--------------------------------------|-------|-------|-------|
| Tributylsilylamine                   | 27.59 | 27.66 | -0.07 |
| Tricaprilin                          | 52.38 | 52.49 | -0.11 |
| Trichloro-2-phenoxyethylsilane       | 23.96 | 23.91 | 0.05  |
| Trichloroacetaldehyde diethylacetal  | 18.95 | 18.97 | -0.02 |
| Trichloroacetic acid                 | 11.01 | 10.99 | 0.02  |
| Trichloroacetic anhydride            | 20.72 | 20.57 | 0.15  |
| Trichloroacetonitrile                | 10.49 | 10.27 | 0.22  |
| Trichloroacetylchloride              | 12.40 | 12.52 | -0.12 |
| Trichloroethylene                    | 10.06 | 10.14 | -0.08 |
| Trichloromethoxybenzene              | 18.69 | 18.86 | -0.17 |
| Trichloromethylchloroformate         | 12.91 | 12.95 | -0.04 |
| Trichlorotoluene                     | 18.20 | 18.25 | -0.05 |
| Trichlorovinylsilane                 | 13.30 | 13.33 | -0.03 |
| Tricosane                            | 43.13 | 43.06 | 0.07  |
| Tridecanal                           | 24.72 | 24.91 | -0.19 |
| Tridecane                            | 24.74 | 24.71 | 0.03  |
| Tridecanonitrile                     | 24.61 | 24.62 | -0.01 |
| Tridecyl borate                      | 59.23 | 59.41 | -0.18 |
| Tridecyl methacrylate                | 32.33 | 32.65 | -0.32 |
| Tridecyl thiocyanate                 | 29.67 | 29.66 | 0.01  |
| Tridecylamine                        | 26.10 | 26.07 | 0.03  |
| Tridecylbenzene                      | 34.43 | 34.44 | -0.01 |
| Tridecylcyclohexane                  | 34.92 | 34.86 | 0.06  |
| Tridecylmercaptan                    | 27.70 | 27.75 | -0.05 |
| Tridodecylamine                      | 68.57 | 68.43 | 0.14  |
| Triethanolamine                      | 15.08 | 15.05 | 0.03  |
| Triethoxymethylsilane                | 18.43 | 18.47 | -0.04 |
| Triethoxypentylsilane                | 25.75 | 25.79 | -0.04 |
| Triethoxyphenylsilane                | 26.22 | 26.35 | -0.13 |
| Triethyl 1-propoxyethoxysilane       | 25.83 | 25.69 | 0.14  |
| Triethyl 2,2-diethylhydrazinosilane  | 25.57 | 25.61 | -0.04 |
| Triethyl 2,2-dimethylhydrazinosilane | 21.99 | 21.97 | 0.02  |
| Triethyl acetylcitrate               | 29.18 | 29.30 | -0.12 |
| Triethyl aconitate                   | 25.14 | 24.90 | 0.24  |
| Triethyl borate                      | 15.34 | 15.36 | -0.02 |
| Triethyl citrate                     | 25.66 | 25.49 | 0.17  |
| Triethyl phosphate                   | 16.56 | 16.67 | -0.11 |
| Triethyl phosphite                   | 17.05 | 17.10 | -0.05 |
| Triethylamine                        | 13.39 | 13.37 | 0.02  |
| Triethylammonium acetate             | 18.54 | 18.40 | 0.14  |
| Triethylborane                       | 13.37 | 13.68 | -0.31 |



|                                                               |       |       |       |
|---------------------------------------------------------------|-------|-------|-------|
| Triethyldecylammonium bis(trifluoromethylsulfonyl) amide      | 44.15 | 44.04 | 0.11  |
| Triethyldodecylammonium bis(trifluoromethylsulfonyl) amide    | 47.85 | 47.71 | 0.14  |
| Triethyleneglycol                                             | 14.27 | 14.32 | -0.05 |
| Triethylheptylammonium bis(trifluoromethylsulfonyl) amide     | 38.47 | 38.54 | -0.07 |
| Triethylhexylammonium bis(trifluoromethylsulfonyl) amide      | 36.75 | 36.70 | 0.05  |
| Triethylisothiocyanatosilane                                  | 21.35 | 21.33 | 0.02  |
| Triethylmethanol                                              | 14.14 | 14.23 | -0.09 |
| Triethyloctylammonium bis(trifluoromethylsulfonyl) amide      | 40.42 | 40.37 | 0.05  |
| Triethylphosphine                                             | 15.96 | 16.03 | -0.07 |
| Triethylsilane                                                | 15.70 | 15.61 | 0.09  |
| Triethylsilanol                                               | 16.09 | 15.93 | 0.16  |
| Triethylsilylamine                                            | 16.68 | 16.65 | 0.03  |
| Triethylsilyloxytripropylsilane                               | 35.75 | 35.78 | -0.03 |
| Triethylsulfonium bis(trifluoromethylsulfonyl) amide          | 27.76 | 27.80 | -0.04 |
| Triethyltetradecylammonium bis(trifluoromethylsulfonyl) amide | 51.47 | 51.39 | 0.08  |
| Triethyltriphenylcyclotrisiloxane                             | 51.20 | 51.25 | -0.05 |
| Trifluoroacetic acid                                          | 5.41  | 5.26  | 0.15  |
| Trifluoroacetic anhydride                                     | 9.45  | 9.12  | 0.33  |
| Trifluoroacetoacetic acid ethylester                          | 13.38 | 13.09 | 0.29  |
| Trifluoroacetophenone                                         | 14.73 | 14.47 | 0.26  |
| Trifluoromethoxybenzene                                       | 12.84 | 12.93 | -0.09 |
| Triheptyl borate                                              | 43.28 | 42.89 | 0.39  |
| Triheptyl phosphate                                           | 44.21 | 44.20 | 0.01  |
| Triheptyl phosphite                                           | 44.67 | 44.63 | 0.04  |
| Trihexoxymethane                                              | 37.93 | 37.73 | 0.20  |
| Trihexyl phosphate                                            | 38.68 | 38.69 | -0.01 |
| Trihexyl phosphite                                            | 39.15 | 39.12 | 0.03  |
| Trihexyl tetradecyl phosphonium dicyanamide                   | 69.31 | 69.41 | -0.10 |
| Trihexyl tetradecyl phosphonium trifluoromethylsulfonate      | 69.64 | 69.66 | -0.02 |
| Trihexylamine                                                 | 35.43 | 35.40 | 0.03  |
| Triisoamylamine                                               | 29.86 | 29.84 | 0.02  |
| Triisobutoxymethane                                           | 26.71 | 26.67 | 0.04  |
| Triisobutylamine                                              | 24.46 | 24.34 | 0.12  |
| Triisobutylborane                                             | 24.70 | 24.64 | 0.06  |
| Triisooctylamine                                              | 46.20 | 46.36 | -0.16 |
| Triisopentoxyborine                                           | 31.77 | 31.83 | -0.06 |

|                                                               |       |       |       |
|---------------------------------------------------------------|-------|-------|-------|
| Tri-isopentoxymethane                                         | 32.23 | 32.24 | -0.01 |
| Triisopentylborane                                            | 30.34 | 30.15 | 0.19  |
| Triisopropoxymethane                                          | 21.21 | 21.23 | -0.02 |
| Triisopropoxyvinylsilane                                      | 25.78 | 25.65 | 0.13  |
| Triisopropyl borate                                           | 20.82 | 20.88 | -0.06 |
| Triisopropyl phosphate                                        | 22.12 | 22.19 | -0.07 |
| Triisopropylethoxysilane                                      | 25.20 | 25.14 | 0.06  |
| Triisopropylphenylsilane                                      | 30.72 | 30.90 | -0.18 |
| Triisopropylphosphite                                         | 22.49 | 22.62 | -0.13 |
| Triisopropylsilane                                            | 21.24 | 21.18 | 0.06  |
| Triisopropylsilyl chloride                                    | 22.88 | 22.82 | 0.06  |
| Trilaurin                                                     | 74.35 | 74.51 | -0.16 |
| Trimethoxyborine                                              | 9.85  | 9.82  | 0.03  |
| Trimethoxymethylsilane                                        | 12.78 | 12.93 | -0.15 |
| Trimethoxyphenylsilane                                        | 20.74 | 20.81 | -0.07 |
| Trimethoxysilylamine                                          | 12.27 | 12.22 | 0.05  |
| Trimethyl 1-ethoxyethoxysilane                                | 18.44 | 18.42 | 0.02  |
| Trimethyl 1-isopropoxyethoxysilane                            | 20.28 | 20.26 | 0.02  |
| Trimethyl 2,2-diethylhydrazinosilane                          | 20.21 | 20.17 | 0.04  |
| Trimethyl 2,2-dimethylhydrazinosilane                         | 16.56 | 16.53 | 0.03  |
| Trimethyl butylammonium<br>bis(trifluoromethylsulfonyl)amide  | 27.86 | 27.89 | -0.03 |
| Trimethyl hexylammonium<br>bis(trifluoromethylsulfonyl)amide  | 31.57 | 31.57 | 0.00  |
| Trimethyl octylammonium<br>bis(trifluoromethylsulfonyl)amide  | 35.27 | 35.24 | 0.03  |
| Trimethyl pentylammonium<br>bis(trifluoromethylsulfonyl)amide | 29.73 | 29.73 | 0.00  |
| Trimethyl phosphate                                           | 11.00 | 11.13 | -0.13 |
| Trimethyl propylammonium<br>bis(trifluoromethylsulfonyl)amide | 26.02 | 26.06 | -0.04 |
| Trimethyl trimellitate                                        | 24.22 | 23.78 | 0.44  |
| Trimethylacetic acid                                          | 10.68 | 10.65 | 0.03  |
| Trimethylamine                                                | 8.31  | 7.92  | 0.39  |
| Trimethyleneglycol dinitrate                                  | 12.32 | 12.40 | -0.08 |
| Trimethylethylene                                             | 9.89  | 9.97  | -0.08 |
| Trimethylethylenediamine                                      | 13.01 | 12.92 | 0.09  |
| Trimethylisothiocyanatosilane                                 | 15.91 | 15.90 | 0.01  |
| Trimethylphosphite                                            | 11.57 | 11.56 | 0.01  |
| Trimethylsilanol                                              | 10.39 | 10.49 | -0.10 |
| Trimethylsilylaminodimethylphenylsilane                       | 28.18 | 28.22 | -0.04 |
| Trimethylsilylaminodiphenylmethylsilane                       | 36.09 | 36.10 | -0.01 |
| Trimethylsilylaminotriethylsilane                             | 25.77 | 25.77 | 0.00  |

|                                       |       |       |       |
|---------------------------------------|-------|-------|-------|
| Trimethylsilylaminotrimethoxysilane   | 21.29 | 21.34 | -0.05 |
| Trimethylsilylaminotriphenylsilane    | 44.27 | 43.98 | 0.29  |
| Trimethylsilyloxytriethylsilane       | 24.76 | 24.84 | -0.08 |
| Trimethylsilyloxytripropylsilane      | 30.34 | 30.34 | 0.00  |
| Trimethylvinylsilane                  | 13.70 | 13.68 | 0.02  |
| Trimyristin                           | 85.86 | 85.52 | 0.34  |
| tri-n-Amylphosphate                   | 33.15 | 33.19 | -0.04 |
| Tri-n-octylamine                      | 46.70 | 46.41 | 0.29  |
| Tri-n-pentylamine                     | 29.85 | 29.89 | -0.04 |
| Trioctyl borate                       | 48.48 | 48.40 | 0.08  |
| Trioctyl phosphite                    | 50.19 | 50.14 | 0.05  |
| Tripentoxyborine                      | 31.88 | 31.88 | 0.00  |
| Tripentoxymethane                     | 32.18 | 32.23 | -0.05 |
| Tripentyl phosphite                   | 33.77 | 33.62 | 0.15  |
| Tripentylsilane                       | 32.32 | 32.13 | 0.19  |
| Triphenylphosphite                    | 35.05 | 34.84 | 0.21  |
| Tripropionine                         | 24.91 | 24.96 | -0.05 |
| Tripropoxymethane                     | 21.06 | 21.22 | -0.16 |
| Tripropyl borate                      | 20.83 | 20.87 | -0.04 |
| Tripropyl phosphate                   | 22.06 | 22.17 | -0.11 |
| Tripropyl phosphite                   | 22.56 | 22.61 | -0.05 |
| Tripropylamine                        | 18.94 | 18.88 | 0.06  |
| Tripropylborane                       | 19.24 | 19.19 | 0.05  |
| Tripropylene glycol                   | 21.29 | 21.68 | -0.39 |
| Tripropylsilane                       | 20.91 | 21.12 | -0.21 |
| Triptane                              | 13.53 | 13.67 | -0.14 |
| Tri-p-tolylamine                      | 37.49 | 37.65 | -0.16 |
| Tris(2,4-dimethylphenyl) phosphate    | 45.73 | 45.85 | -0.12 |
| Tris(2-butoxyethyl) phosphite         | 41.31 | 41.13 | 0.18  |
| Tris(2-chloroethyl) phosphate         | 22.80 | 22.38 | 0.42  |
| Tris(2-chloroethyl) phosphite         | 22.85 | 22.81 | 0.04  |
| Tris(2-ethoxyethyl) phosphite         | 30.27 | 30.12 | 0.15  |
| Tris(2-ethylhexyl) aconitate          | 58.04 | 57.89 | 0.15  |
| Tris(2-hexoxyethyl) phosphite         | 52.32 | 52.15 | 0.17  |
| Tris(2-hydroxyethyl)phosphine         | 17.71 | 17.71 | 0.00  |
| Tris(2-methoxyethyl) phosphite        | 24.72 | 24.58 | 0.14  |
| Tris(2-pentoxyethyl) phosphite        | 46.83 | 46.64 | 0.19  |
| Tris(2-propoxyethyl) phosphite        | 35.79 | 35.63 | 0.16  |
| Tris(4-bromophenyl)amine              | 40.89 | 40.95 | -0.06 |
| Tris(amylothio)phosphite              | 42.57 | 42.50 | 0.07  |
| Tris(butylothio)phosphite             | 37.00 | 37.00 | 0.00  |
| Tris(dimethylamino)dibutylaminosilane | 35.11 | 35.16 | -0.05 |

|                                   |       |       |       |
|-----------------------------------|-------|-------|-------|
| Tris(ethylthio)borane             | 23.55 | 23.62 | -0.07 |
| Tris(ethylthio)phosphite          | 25.88 | 25.98 | -0.10 |
| Tris(o-tolyl) phosphite           | 40.35 | 40.56 | -0.21 |
| Tris(propylthio)phosphite         | 31.47 | 31.49 | -0.02 |
| Tris(p-tolyl) phosphite           | 40.65 | 40.56 | 0.09  |
| Trisilane                         | 14.51 | 14.54 | -0.03 |
| Tritane                           | 31.96 | 31.87 | 0.09  |
| Tropacocaine                      | 27.80 | 27.58 | 0.22  |
| Tropine                           | 15.68 | 15.87 | -0.19 |
| Undecane                          | 21.03 | 21.04 | -0.01 |
| Undecanedioic acid                | 22.25 | 22.31 | -0.06 |
| Undecanonitrile                   | 20.72 | 20.95 | -0.23 |
| Undecyl thiocyanate               | 25.98 | 25.99 | -0.01 |
| Undecylbenzene                    | 30.75 | 30.77 | -0.02 |
| Uracil                            | 10.09 | 9.70  | 0.39  |
| Urea                              | 5.15  | 4.82  | 0.33  |
| Valeramide                        | 11.57 | 11.27 | 0.30  |
| Valerophenone                     | 19.69 | 19.87 | -0.18 |
| Valeryl chloride                  | 11.91 | 12.19 | -0.28 |
| Veratrole                         | 15.68 | 15.68 | 0.00  |
| Vinyl acetate                     | 8.79  | 8.60  | 0.19  |
| Vinyl tris(2-chloropropoxy)silane | 31.44 | 31.30 | 0.14  |
| Vinylacetylene                    | 7.31  | 7.26  | 0.05  |
| Vinylcyclohexane                  | 14.51 | 14.54 | -0.03 |
| Vinylcyclopentane                 | 12.72 | 12.71 | 0.01  |
| Vinyldiethoxymethylsilane         | 17.87 | 17.93 | -0.06 |
| Vinylformate                      | 6.93  | 6.81  | 0.12  |
| Vinylidenechloride                | 8.10  | 8.24  | -0.14 |
| Vinylidoacetylene                 | 12.60 | 12.31 | 0.29  |
| Vinyloxirane                      | 7.75  | 7.89  | -0.14 |
| Vinyltriacetoxysilane             | 20.04 | 20.00 | 0.04  |
| Vinyltriethoxysilane              | 20.12 | 20.13 | -0.01 |
| Vinyltrimethoxysilane             | 14.43 | 14.59 | -0.16 |
| Vitamin E                         | 53.40 | 53.56 | -0.16 |
| Vitamin E acetate                 | 57.53 | 57.30 | 0.23  |
| Widdrene                          | 25.70 | 25.74 | -0.04 |
| Xibornol                          | 31.30 | 31.71 | -0.41 |
| Ylangene                          | 26.01 | 25.69 | 0.32  |
| Z,E-Nepetalactone                 | 17.74 | 17.94 | -0.20 |
