# Supplementary material
Source: MDPI journal article supplement (https://www.mdpi.com/2673-8015/2/4/20)
Supplement: s1 [file s1]

| Molecule name                                                             | Molecular volume | Refractivity | Refractivity vol.-deriv. | Deviation |
|---------------------------------------------------------------------------|------------------|--------------|--------------------------|-----------|
| Tetra(1H,1H,5H-perfluoropentyl)silicate                                   | 548.70           | 111.97       | 151.94                   | -39.97    |
| 1,6-Hexanediol bis(perfluorooctanoate)                                    | 541.30           | 112.55       | 149.91                   | -37.36    |
| 1,6-Hexanediol bis(6-H-perfluoroheptanoate)                               | 481.40           | 101.76       | 133.48                   | -31.72    |
| Perfluorotributylamine                                                    | 344.60           | 64.77        | 95.95                    | -31.18    |
| Hexakis(2-(2-(methylthio)ethythio)ethoxy)cyclotetraphosphazene            | 870.90           | 268.40       | 240.31                   | 28.09     |
| Hexakis(2-(2-(methylthiomethythio)ethoxy)cyclotetraphosphazene            | 771.10           | 239.62       | 212.94                   | 26.68     |
| Heptasilane                                                               | 207.20           | 84.77        | 58.27                    | 26.50     |
| Perfluorotripropylamine                                                   | 268.60           | 50.02        | 75.11                    | -25.09    |
| Hexakis(ethylthio)cyclotriphosphazene                                     | 404.50           | 137.19       | 112.38                   | 24.81     |
| Tetra(1H,1H,3H-perfluoropropyl)silicate                                   | 346.10           | 72.19        | 96.37                    | -24.18    |
| 2-Silylpentasilane                                                        | 179.80           | 73.17        | 50.75                    | 22.42     |
| 9,10-Benzophenanthrene                                                    | 210.60           | 81.33        | 59.20                    | 22.13     |
| Tris(4-bromophenyl)amine                                                  | 290.30           | 103.16       | 81.06                    | 22.10     |
| Hexasilane                                                                | 179.70           | 72.78        | 50.72                    | 22.06     |
| Benzo[a]phenanthrene                                                      | 211.40           | 81.33        | 59.42                    | 21.91     |
| Tetracene                                                                 | 212.90           | 81.41        | 59.83                    | 21.58     |
| 1-Butyl-3-methylimidazolium bis(perfluorobutanesulfonyl) amide            | 454.60           | 105.39       | 126.13                   | -20.74    |
| 1-Ethyl-3-methylimidazolium tris(pentafluoroethyl)trifluorophosphate      | 337.80           | 73.50        | 94.09                    | -20.59    |
| Tetramethyltetraphenylcyclotetrasiloxane                                  | 482.40           | 154.31       | 133.75                   | 20.56     |
| Perfluoro-trans-decalin                                                   | 239.60           | 46.65        | 67.15                    | -20.50    |
| Perfluoroheptane                                                          | 203.80           | 36.91        | 57.33                    | -20.42    |
| Pyrene                                                                    | 185.50           | 72.58        | 52.32                    | 20.26     |
| 1,6-Hexanediol bis(perfluorobutyrate)                                     | 334.50           | 73.03        | 93.18                    | -20.15    |
| Methyl perfluorooctanoate                                                 | 243.60           | 48.12        | 68.25                    | -20.13    |
| Butyl perfluorooctanoate                                                  | 292.50           | 61.65        | 81.66                    | -20.01    |
| 1,10-Decanediol bis(perfluorobutyrate)                                    | 401.70           | 91.67        | 111.62                   | -19.95    |
| 1-Hexyl-3-methylimidazolium tris(pentafluoroethyl)trifluorophosphate      | 404.20           | 92.43        | 112.30                   | -19.87    |
| 1H-Pentadecafluoroheptane                                                 | 199.10           | 36.27        | 56.05                    | -19.78    |
| 1,1,2,2-Tetrabromo-1-triethylsilylpropane                                 | 256.60           | 91.34        | 71.82                    | 19.52     |
| Trimethylsilylaminotriphenylsilane                                        | 331.20           | 111.69       | 92.28                    | 19.41     |
| Heptafluorobutanoic anhydride                                             | 225.30           | 43.93        | 63.23                    | -19.30    |
| 1,3-Dipentyl-1,3-diphospha-2,4-dithiacyclobutane 1,3-dithioxide           | 284.40           | 98.52        | 79.44                    | 19.08     |
| 1,3-Dihexyl-1,3-diphospha-2,4-dithiacyclobutane 1,3-dithioxide            | 317.80           | 107.45       | 88.60                    | 18.85     |
| Perfluorohexane                                                           | 177.90           | 31.58        | 50.23                    | -18.65    |
| 1,3-Di(4-methylpentyl)-1,3-diphospha-2,4-dithiacyclobutane 1,3-dithioxide | 316.80           | 106.96       | 88.33                    | 18.63     |
| 2,2-Dimethylazoxybenzene                                                  | 210.50           | 77.61        | 59.17                    | 18.44     |
| Perfluoro-2-methylpentane                                                 | 176.50           | 31.55        | 49.85                    | -18.30    |
| 3,3'-Dimethylazoxybenzene                                                 | 212.60           | 78.03        | 59.75                    | 18.28     |

|                                                                                   |        |        |        |        |
|-----------------------------------------------------------------------------------|--------|--------|--------|--------|
| 2-Silyltetrasilane                                                                | 152.00 | 61.12  | 43.13  | 17.99  |
| Pentasilane                                                                       | 151.50 | 60.80  | 42.99  | 17.81  |
| Buthiobate                                                                        | 357.60 | 116.68 | 99.52  | 17.16  |
| Ethyl-bis(ethylthio)phosphine                                                     | 171.60 | 65.59  | 48.50  | 17.09  |
| Perfluoromethylcyclohexane                                                        | 182.80 | 34.93  | 51.57  | -16.64 |
| Bis(phenylamino)phenylborane                                                      | 262.30 | 89.91  | 73.38  | 16.53  |
| Iodoform                                                                          | 101.70 | 45.51  | 29.33  | 16.18  |
| 1,1,1-Tris(ethylthio)ethane                                                       | 199.70 | 72.20  | 56.21  | 15.99  |
| Hexabromoethane                                                                   | 153.50 | 59.48  | 43.54  | 15.94  |
| 5-Iodoacenaphthene                                                                | 171.20 | 64.03  | 48.39  | 15.64  |
| 2-Phenylvinyl diethylthio phosphorus oxide                                        | 244.00 | 83.93  | 68.36  | 15.57  |
| Tri-p-tolylamine                                                                  | 284.00 | 94.58  | 79.33  | 15.25  |
| Isopropyltriisothiocyanatosilane                                                  | 192.70 | 69.52  | 54.29  | 15.23  |
| Anthracene                                                                        | 169.70 | 62.99  | 47.98  | 15.01  |
| Butyltriisothiocyanatosilane                                                      | 209.60 | 73.92  | 58.93  | 14.99  |
| 2-Iodonaphthalene                                                                 | 151.30 | 57.90  | 42.93  | 14.97  |
| N-Phenyl-N-benzylbenzenemethanamine                                               | 269.80 | 90.33  | 75.44  | 14.89  |
| Ethyltriisothiocyanatosilane                                                      | 176.20 | 64.17  | 49.76  | 14.41  |
| Propyltriisothiocyanatosilane                                                     | 192.90 | 68.69  | 54.35  | 14.34  |
| 1-Methylantracene                                                                 | 185.80 | 66.73  | 52.40  | 14.33  |
| Pyridate                                                                          | 336.90 | 79.72  | 93.84  | -14.12 |
| 2-(Chloromethylthio)benzothiazole                                                 | 161.00 | 59.68  | 45.60  | 14.08  |
| 1-Phenyl-naphthalene                                                              | 196.50 | 69.33  | 55.33  | 14.00  |
| N-Methyl-N-(2,3-dihydroxypropyl)pyrrolidinium bis(trifluoromethanesulfonyl) amide | 318.80 | 74.88  | 88.88  | -14.00 |
| Phenanthrene                                                                      | 168.90 | 61.74  | 47.76  | 13.98  |
| 1-Iodonaphthalene                                                                 | 150.60 | 56.60  | 42.74  | 13.86  |
| 2,4,6-Trimethyl-2,4,6-triphenylcyclotrisiloxane                                   | 366.80 | 115.86 | 102.04 | 13.82  |
| Triethyltriphenylcyclotrisiloxane                                                 | 416.20 | 129.17 | 115.59 | 13.58  |
| Trimethylsilylaminodiphenylmethysilane                                            | 277.30 | 91.05  | 77.49  | 13.56  |
| Tetrasilane                                                                       | 123.80 | 48.89  | 35.39  | 13.50  |
| 1,2-Diiodobenzene                                                                 | 132.20 | 51.18  | 37.70  | 13.48  |
| 2-Silyltrisilane                                                                  | 123.90 | 48.88  | 35.42  | 13.46  |
| Decamethyltetrasilane                                                             | 287.70 | 93.78  | 80.35  | 13.43  |
| 1-(2-Hydroxyethyl)-3-methylimidazolium perfluoropentanoate                        | 269.80 | 62.30  | 75.44  | -13.14 |
| Diethyldiiodosilane                                                               | 153.70 | 56.71  | 43.59  | 13.12  |
| 4-Phenoxyphenyldiallylphosphine                                                   | 273.50 | 89.52  | 76.45  | 13.07  |
| Trimethyl butylammonium bis(trifluoromethylsulfonyl)amide                         | 298.60 | 70.29  | 83.34  | -13.05 |
| Tritane                                                                           | 241.20 | 80.63  | 67.59  | 13.04  |
| 2,2,3,3,4,4,5,5-Octafluoro-1-pentanol                                             | 142.10 | 27.48  | 40.41  | -12.93 |
| Tris(p-tolyl) phosphite                                                           | 321.60 | 102.54 | 89.65  | 12.89  |
| 5-Bromoacenaphthene                                                               | 165.10 | 59.55  | 46.72  | 12.83  |
| Sulprofos                                                                         | 276.80 | 90.16  | 77.36  | 12.80  |
| Triethylhexylammonium bis(trifluoromethylsulfonyl) amide                          | 379.40 | 92.72  | 105.50 | -12.78 |
| 1,2-Bis(1,1,2,2-tetrafluoroethoxy)ethane                                          | 169.90 | 35.33  | 48.04  | -12.71 |

|                                                                       |        |        |        |        |
|-----------------------------------------------------------------------|--------|--------|--------|--------|
| Di-t-butyltetrasulfide                                                | 218.30 | 73.99  | 61.31  | 12.68  |
| 1-Butyl-1-methylpyrrolidinium<br>bis(trifluoromethylsulfonyl)amide    | 321.30 | 76.89  | 89.56  | -12.67 |
| Triethyloctylammonium<br>bis(trifluoromethylsulfonyl) amide           | 412.60 | 101.96 | 114.61 | -12.65 |
| Dimethyl butyl isopropylammonium<br>bis(trifluoromethylsulfonyl)amide | 327.90 | 78.81  | 91.37  | -12.56 |
| Dimethylpropylisopropylammonium<br>bis(trifluoromethylsulfonyl)amide  | 308.60 | 73.56  | 86.08  | -12.52 |
| Tris(amythio)phosphite                                                | 340.70 | 107.39 | 94.88  | 12.51  |
| Trimethyl hexylammonium<br>bis(trifluoromethylsulfonyl)amide          | 330.50 | 79.64  | 92.09  | -12.45 |
| Tributylmethylammonium<br>bis(trifluoromethylsulfonyl)amide           | 395.90 | 97.59  | 110.02 | -12.43 |
| Bis(dimethylphenylsilyl)amine                                         | 281.50 | 91.08  | 78.65  | 12.43  |
| Triethyldecylammonium<br>bis(trifluoromethylsulfonyl) amide           | 445.80 | 111.38 | 123.71 | -12.33 |
| 1-Butyl-1-methylpiperidinium<br>bis(trifluoromethylsulfonyl)amide     | 336.50 | 81.48  | 93.73  | -12.25 |
| 1-Heptyl-3-methylimidazolium<br>hexafluorophosphate                   | 278.00 | 65.44  | 77.69  | -12.25 |
| Di-4-tolylthiophosphoric aziride                                      | 276.00 | 89.38  | 77.14  | 12.24  |
| Tris(butylthio)phosphite                                              | 290.50 | 93.35  | 81.12  | 12.23  |
| Tris(o-tolyl) phosphite                                               | 321.40 | 101.79 | 89.59  | 12.20  |
| Triphenylphosphite                                                    | 272.70 | 88.43  | 76.23  | 12.20  |
| 1-Methyl-1-propylpiperidinium<br>bis(trifluoromethylsulfonyl)amide    | 319.60 | 76.90  | 89.10  | -12.20 |
| 1-Isobutyl-1-methylpyrrolidinium<br>bis(trifluoromethylsulfonyl)amide | 320.00 | 77.02  | 89.21  | -12.19 |
| Triethyltetradecylammonium<br>bis(trifluoromethylsulfonyl) amide      | 512.30 | 129.84 | 141.95 | -12.11 |
| Triethyldodecylammonium<br>bis(trifluoromethylsulfonyl) amide         | 479.00 | 120.72 | 132.82 | -12.10 |
| 1-Pentyl-3-methylimidazolium<br>hexafluorophosphate                   | 243.40 | 56.11  | 68.20  | -12.09 |
| 1-Nonyl-3-methylimidazolium<br>hexafluorophosphate                    | 311.30 | 74.74  | 86.82  | -12.08 |
| Trimethyl propylammonium<br>bis(trifluoromethylsulfonyl)amide         | 278.00 | 65.65  | 77.69  | -12.04 |
| 1-Methyl-1-decylpyrrolidinium<br>bis(trifluoromethanesulfonyl) amide  | 421.00 | 104.90 | 116.91 | -12.01 |
| Tris(propylthio)phosphite                                             | 240.50 | 79.39  | 67.40  | 11.99  |
| 1-Methyl-1-propylpyrrolidinium<br>bis(trifluoromethanesulfonyl) amide | 302.40 | 72.50  | 84.38  | -11.88 |
| 1-Hexyl-3-methylimidazolium<br>hexafluorophosphate                    | 259.30 | 60.69  | 72.56  | -11.87 |
| Perfluorocyclohexene                                                  | 143.00 | 28.80  | 40.66  | -11.86 |
| Ethyl heptafluorobutanoate                                            | 156.80 | 32.59  | 44.44  | -11.85 |
| Sucrose octaacetate                                                   | 572.80 | 146.84 | 158.55 | -11.71 |
| Bis(methylphenylamino)borane                                          | 224.00 | 74.57  | 62.88  | 11.69  |

|                                                                    |        |        |        |        |
|--------------------------------------------------------------------|--------|--------|--------|--------|
| Trimethyl pentylammonium bis(trifluoromethylsulfonyl)amide         | 310.80 | 75.01  | 86.68  | -11.67 |
| Methyl perfluorobutanoate                                          | 140.40 | 28.32  | 39.95  | -11.63 |
| Tris(ethylthio)phosphite                                           | 190.40 | 65.28  | 53.66  | 11.62  |
| Diphenyl sulfide                                                   | 170.60 | 59.77  | 48.23  | 11.54  |
| 1-Methyl-4-(phenylthio)benzene                                     | 187.20 | 64.25  | 52.78  | 11.47  |
| 1-Octyl-3-methylimidazolium hexafluorophosphate                    | 292.80 | 70.30  | 81.75  | -11.45 |
| 1-Butyl-3-methylimidazolium hexafluorophosphate                    | 224.10 | 51.46  | 62.90  | -11.44 |
| Tributyloctylphosphonium dibenzoylmethide                          | 575.80 | 170.81 | 159.37 | 11.44  |
| 1-(3-Cyanopropyl)-3-methylimidazolium tetrafluoroborate            | 207.30 | 46.88  | 58.29  | -11.41 |
| 1-Hexyl-1-methylpyrrolidinium bis(trifluoromethanesulfonyl) amide  | 354.50 | 87.26  | 98.67  | -11.41 |
| Triethylheptylammonium bis(trifluoromethylsulfonyl) amide          | 390.10 | 97.05  | 108.43 | -11.38 |
| 1,8-Diaminonaphthalene                                             | 147.40 | 53.24  | 41.87  | 11.37  |
| Trimethyl octylammonium bis(trifluoromethylsulfonyl)amide          | 360.60 | 88.97  | 100.34 | -11.37 |
| Di-3-tolylthiophosphoric aziride                                   | 278.20 | 89.11  | 77.74  | 11.37  |
| Diphenylthiophosphoric aziride                                     | 243.30 | 79.51  | 68.17  | 11.34  |
| Perfluorobutanoic acid                                             | 123.10 | 23.87  | 35.20  | -11.33 |
| Dinonyldiphenylsilane                                              | 480.30 | 144.50 | 133.17 | 11.33  |
| Chloro(tert-butyl)diphenylsilane                                   | 260.10 | 83.98  | 72.78  | 11.20  |
| Bis(2-tolyl)-N-isobutylaminoborane                                 | 275.10 | 88.08  | 76.89  | 11.19  |
| Dimethyl hexyl isopropylammonium bis(trifluoromethylsulfonyl)amide | 360.50 | 89.14  | 100.32 | -11.18 |
| 2,2,3,3,4,4,4-Heptafluoro-1-butanol                                | 119.10 | 22.95  | 34.10  | -11.15 |
| Hexaethyltetraphosphate                                            | 402.50 | 100.69 | 111.84 | -11.15 |
| Bis(2-tolyl)-N-ethylaminoborane                                    | 242.60 | 79.12  | 67.98  | 11.14  |
| Hexyl perfluorobutyrate                                            | 223.00 | 51.46  | 62.60  | -11.14 |
| Dichlorodiphenylsilane                                             | 209.40 | 69.99  | 58.87  | 11.12  |
| Hexaethyl tetraphosphate                                           | 402.40 | 100.69 | 111.81 | -11.12 |
| Didecyldiphenylsilane                                              | 513.60 | 153.40 | 142.31 | 11.09  |
| 1-Naphthalenethiol                                                 | 144.60 | 52.18  | 41.10  | 11.08  |
| 1-Butyl-3-methylimidazolium perfluorobutylsulfonate                | 302.20 | 73.34  | 84.32  | -10.98 |
| Trifluoroacetic anhydride                                          | 121.60 | 23.83  | 34.79  | -10.96 |
| Ethylphenylboronic anhydride                                       | 255.90 | 82.57  | 71.62  | 10.95  |
| Decyldiphenylnonylsilane                                           | 497.00 | 148.69 | 137.76 | 10.93  |
| Di-4-tolylphosphorous aziridide                                    | 260.00 | 83.65  | 72.75  | 10.90  |
| Di-3-tolylphosphorous aziridide                                    | 260.00 | 83.57  | 72.75  | 10.82  |
| Squalene                                                           | 467.60 | 140.49 | 129.69 | 10.80  |
| Methyltriphenoxysilane                                             | 290.40 | 91.85  | 81.09  | 10.76  |
| Tetrabromopyrrole                                                  | 142.40 | 51.23  | 40.49  | 10.74  |
| Phenylpropylboronic anhydride                                      | 285.30 | 90.30  | 79.69  | 10.61  |
| Tris(2,4-dimethylphenyl) phosphate                                 | 376.70 | 115.36 | 104.76 | 10.60  |
| 1,8-Dichloronaphthalene                                            | 152.40 | 53.81  | 43.24  | 10.57  |
| 2-Bromonaphthalene                                                 | 145.00 | 51.77  | 41.21  | 10.56  |

|                                                                             |        |       |       |        |
|-----------------------------------------------------------------------------|--------|-------|-------|--------|
| N-(1-Naphthyl)ethylenediamine                                               | 182.60 | 62.08 | 51.52 | 10.56  |
| Phosphorous tribromide                                                      | 87.70  | 36.04 | 25.49 | 10.55  |
| Tri(ethoxycarbonylmethoxy)borine                                            | 292.50 | 71.14 | 81.66 | -10.52 |
| 1-Bromonaphthalene                                                          | 144.50 | 51.58 | 41.07 | 10.51  |
| Diethyldiisothiocyanatosilane                                               | 173.70 | 59.55 | 49.08 | 10.47  |
| Bis(2-tolyl)-N-methylaminoborane                                            | 226.40 | 74.00 | 63.53 | 10.47  |
| 1-(3-Cyanopropyl)-3-methylimidazolium<br>bis(trifluoromethylsulfonyl) amide | 305.00 | 74.64 | 85.09 | -10.45 |
| 5-Chloroacenaphthene                                                        | 161.20 | 56.07 | 45.65 | 10.42  |
| 1-Heptyl-3-methylimidazolium<br>bis(trifluoromethanesulfonyl) amide         | 354.10 | 88.14 | 98.56 | -10.42 |
| Dibutyldiisothiocyanatosilane                                               | 240.40 | 77.77 | 67.37 | 10.40  |
| Tri(2-ethoxycarbonylethoxy)borine                                           | 342.30 | 84.97 | 95.32 | -10.35 |
| 1-Ethyl-2,3-dimethylimidazolium<br>bis(trifluoromethanesulfonyl) amide      | 287.50 | 69.94 | 80.29 | -10.35 |
| 2-Bromoiodobenzene                                                          | 126.10 | 46.37 | 36.02 | 10.35  |
| 4-Ethylphenyldiallylphosphine                                               | 226.30 | 73.82 | 63.51 | 10.31  |
| 1-Propyl-3-methylimidazolium<br>tetrafluoroborate                           | 189.40 | 43.09 | 53.39 | -10.30 |
| Ethyl-phenyl-propylthiophosphine                                            | 207.50 | 68.64 | 58.35 | 10.29  |
| 1-Hexyl-3-methylimidazolium<br>tetrafluoroborate                            | 239.70 | 56.91 | 67.18 | -10.27 |
| 1-Pentyl-3-methylimidazolium<br>tetrafluoroborate                           | 222.70 | 52.25 | 62.52 | -10.27 |
| 1,7-Dichloronaphthalene                                                     | 154.70 | 54.12 | 43.87 | 10.25  |
| 2-Tolyl 4-tolyl propoxyborine                                               | 257.30 | 82.26 | 72.01 | 10.25  |
| 1-Methylmorpholinium tetrafluoroborate                                      | 163.00 | 35.90 | 46.14 | -10.24 |
| 2,2-Diodopropane                                                            | 110.40 | 41.96 | 31.72 | 10.24  |
| 1,3-Diphenyl-1-butene                                                       | 213.80 | 70.32 | 60.08 | 10.24  |
| 2-Tolyl 3-tolyl propoxyborine                                               | 256.80 | 82.11 | 71.87 | 10.24  |
| 1-Methylpiperidinium tetrafluoroborate                                      | 170.00 | 37.84 | 48.06 | -10.22 |
| 1,1,3,3-Tetramethyl-1,3-diphenyldisiloxane                                  | 281.50 | 88.87 | 78.65 | 10.22  |
| Phenylbis(2-methylallyl)phosphine                                           | 224.20 | 73.15 | 62.93 | 10.22  |
| 4-Isopropylphenyldiallylphosphine                                           | 243.00 | 78.28 | 68.09 | 10.19  |
| 1-Butyl-3-ethylimidazolium<br>bis(trifluoromethylsulfonyl) amide            | 321.50 | 79.44 | 89.62 | -10.18 |
| N-Methyldiphenylamine                                                       | 181.60 | 61.39 | 51.25 | 10.14  |
| 1,3-Diethylimidazolium<br>bis(trifluoromethylsulfonyl) amide                | 287.90 | 70.29 | 80.40 | -10.11 |
| 1-Ethyl-3-methylimidazolium<br>bis(trifluoromethanesulfonyl) amide          | 271.40 | 65.77 | 75.88 | -10.11 |
| N-Ethyl-1-naphthalenamine                                                   | 171.10 | 58.47 | 48.37 | 10.10  |
| Aminobis(2-tolyl)borane                                                     | 210.20 | 69.18 | 59.09 | 10.09  |
| 2,3-Dihydro-1,1,3-trimethyl-3-phenyl-1H-<br>indene                          | 239.70 | 77.27 | 67.18 | 10.09  |
| 1-Ethyl-3-propylimidazolium<br>bis(trifluoromethanesulfonyl) amide          | 304.70 | 74.95 | 85.01 | -10.06 |
| Acenaphthene                                                                | 147.10 | 51.84 | 41.78 | 10.06  |
| 1-Ethyl-3-methylimidazolium<br>tetrafluoroborate                            | 172.50 | 38.70 | 48.75 | -10.05 |

|                                                                       |        |        |        |        |
|-----------------------------------------------------------------------|--------|--------|--------|--------|
| 1,5-Diiodopentane                                                     | 144.10 | 51.00  | 40.96  | 10.04  |
| 1,6-Diiodohexane                                                      | 160.80 | 55.58  | 45.54  | 10.04  |
| 1,1-Diiodoethane                                                      | 93.90  | 37.20  | 27.19  | 10.01  |
| 1-Isobutyl-3-methylimidazolium<br>bis(trifluoromethanesulfonyl) amide | 304.40 | 74.92  | 84.93  | -10.01 |
| 1-t-Amylnaphthalene                                                   | 205.80 | 67.88  | 57.88  | 10.00  |
| Diphenylsilane                                                        | 182.70 | 61.53  | 51.55  | 9.98   |
| Diphenylnonylsilane                                                   | 331.40 | 102.30 | 92.33  | 9.97   |
| 1-Octyl-3-methylimidazolium<br>tetrafluoroborate                      | 272.60 | 66.24  | 76.21  | -9.97  |
| 1,1-Diphenylethylene                                                  | 180.70 | 60.96  | 51.00  | 9.96   |
| 1-Propyl-3-methylimidazolium<br>bis(trifluoromethanesulfonyl) amide   | 288.00 | 70.48  | 80.43  | -9.95  |
| Bis(ethylphenyl)disiloxane                                            | 282.40 | 88.84  | 78.89  | 9.95   |
| Diiodomethane                                                         | 77.30  | 32.56  | 22.64  | 9.92   |
| 4-Bromodiphenyl ether                                                 | 181.20 | 61.05  | 51.14  | 9.91   |
| 1,3-Dimethylimidazolium<br>bis(trifluoromethylsulfonyl) amide         | 251.70 | 60.56  | 70.47  | -9.91  |
| 2-Naphthylamine                                                       | 138.00 | 49.16  | 39.29  | 9.87   |
| N,N-Dimethyl-1-naphthylamine                                          | 170.30 | 58.01  | 48.15  | 9.86   |
| 1,4-Diiodobutane                                                      | 127.40 | 46.24  | 36.38  | 9.86   |
| 1-Pentyl-3-methylimidazolium<br>bis(trifluoromethanesulfonyl) amide   | 320.80 | 79.57  | 89.43  | -9.86  |
| 1-Butyl-3-methylimidazolium<br>tetrafluoroborate                      | 205.00 | 47.81  | 57.66  | -9.85  |
| Triethylsulfonium<br>bis(trifluoromethylsulfonyl) amide               | 286.00 | 70.04  | 79.88  | -9.84  |
| 1,6-Dimethyl-4-isopropynaphthalene                                    | 207.30 | 68.13  | 58.29  | 9.84   |
| Fluorene                                                              | 158.30 | 54.69  | 44.85  | 9.84   |
| Benzophenone-N-methylimine                                            | 191.30 | 63.74  | 53.91  | 9.83   |
| Decyldiphenylsilane                                                   | 348.10 | 106.74 | 96.91  | 9.83   |
| Benzalaniline                                                         | 176.80 | 59.73  | 49.93  | 9.80   |
| 1,1,1,3,3,3-Hexafluoro-2-methoxypropane                               | 115.40 | 23.29  | 33.09  | -9.80  |
| (Iodomethyl)benzene                                                   | 122.90 | 44.94  | 35.15  | 9.79   |
| 1,3-Diiodopropane                                                     | 110.70 | 41.58  | 31.80  | 9.78   |
| 1-Ethylmorpholinium tetrafluoroborate                                 | 179.20 | 40.81  | 50.59  | -9.78  |
| Octadecyl perfluorobutyrate                                           | 423.20 | 107.74 | 117.51 | -9.77  |
| 1,2-Dichloronaphthalene                                               | 154.60 | 53.59  | 43.84  | 9.75   |
| 2-Phenylvinyl diethoxy phosphorus thioxide                            | 234.60 | 75.52  | 65.78  | 9.74   |
| (2-Iodoethyl)benzene                                                  | 140.10 | 49.59  | 39.86  | 9.73   |
| 1-Naphthylamine                                                       | 137.20 | 48.79  | 39.07  | 9.72   |
| Diethylmethylsulfonium<br>bis(trifluoromethylsulfonyl) amide          | 268.70 | 65.43  | 75.14  | -9.71  |
| 1,4-Dichloronaphthalene                                               | 154.30 | 53.45  | 43.76  | 9.69   |
| 2,3-Diaminonaphthalene                                                | 148.80 | 51.92  | 42.25  | 9.67   |
| N,N-Diethyl-1-naphthalenamine                                         | 203.60 | 66.95  | 57.28  | 9.67   |
| p-Xylyldiallylphosphine                                               | 225.70 | 72.99  | 63.34  | 9.65   |
| Bromo ethylthio phenylborane                                          | 168.40 | 57.27  | 47.63  | 9.64   |
| Trithiocarbonic acid                                                  | 78.40  | 32.57  | 22.94  | 9.63   |
| 3-Chlorobiphenyl                                                      | 167.80 | 57.09  | 47.46  | 9.63   |

|                                                                     |        |        |        |       |
|---------------------------------------------------------------------|--------|--------|--------|-------|
| 1-Hexyl-3-methylimidazolium bis(trifluoromethanesulfonyl) amide     | 336.90 | 84.23  | 93.84  | -9.61 |
| Dimethyldiisothiocyanatosilane                                      | 141.80 | 49.92  | 40.33  | 9.59  |
| Phenyl 2-tolyl propoxyborine                                        | 241.00 | 77.12  | 67.54  | 9.58  |
| 1-Iodo-2,6-dimethylbenzene                                          | 139.80 | 49.36  | 39.78  | 9.58  |
| 2-Formylnaphthalene                                                 | 145.80 | 50.99  | 41.43  | 9.56  |
| 1-(Chloromethyl)naphthalene                                         | 155.90 | 53.74  | 44.20  | 9.54  |
| 2-Octylnaphthalene                                                  | 259.20 | 82.07  | 72.53  | 9.54  |
| 1,6-Dimethylnaphthalene                                             | 158.80 | 54.52  | 44.99  | 9.53  |
| Trifluoromethoxy-2-chloro-1,2,2-trifluoroethane                     | 114.40 | 23.29  | 32.81  | -9.52 |
| 1-t-Butylnaphthalene                                                | 189.70 | 62.99  | 53.47  | 9.52  |
| Methyl pentafluoropropanoate                                        | 113.30 | 22.99  | 32.51  | -9.52 |
| Dimethyldiphenylsilane                                              | 215.50 | 70.04  | 60.54  | 9.50  |
| 2-t-Amylnaphthalene                                                 | 207.70 | 67.90  | 58.40  | 9.50  |
| Heptafluorobutanoyl chloride                                        | 127.80 | 27.01  | 36.49  | -9.48 |
| 1-Nonyl-3-methylimidazolium bis(trifluoromethanesulfonyl) amide     | 386.80 | 98.06  | 107.53 | -9.47 |
| 2-Heptylnaphthalene                                                 | 242.50 | 77.41  | 67.95  | 9.46  |
| Diphenylphosphorous aziridide                                       | 228.30 | 73.51  | 64.05  | 9.46  |
| 3,3'-Bitolyl                                                        | 186.20 | 61.93  | 52.51  | 9.42  |
| 2-Phenylvinyl bis(dipropylamino) phosphorus oxide                   | 352.70 | 107.56 | 98.18  | 9.38  |
| 2-Hexylnaphthalene                                                  | 225.80 | 72.75  | 63.37  | 9.38  |
| 2-Chloronaphthalene                                                 | 140.80 | 49.42  | 40.05  | 9.37  |
| Heptyl 1-naphthylketone                                             | 260.10 | 82.14  | 72.78  | 9.36  |
| 2-Pentylnaphthalene                                                 | 208.90 | 68.09  | 58.73  | 9.36  |
| Tripentylthiomethane                                                | 334.30 | 102.48 | 93.13  | 9.35  |
| 1-Methylpyrrolidinium tetrafluoroborate                             | 154.80 | 34.55  | 43.89  | -9.34 |
| N-Benzyl-2-methylaniline                                            | 198.80 | 65.29  | 55.96  | 9.33  |
| Dimethyl carbonotrithioate                                          | 111.80 | 41.39  | 32.10  | 9.29  |
| Diphenylmethylsilylamine                                            | 209.00 | 68.03  | 58.76  | 9.27  |
| Diphenylmethylsilane                                                | 199.00 | 65.28  | 56.02  | 9.26  |
| 2-(1,1,2,2-Tetrafluoroethoxy)ethanol                                | 116.40 | 24.11  | 33.36  | -9.25 |
| 1-Butyl-3-methylimidazolium bis(trifluoromethanesulfonyl) amide     | 301.90 | 74.99  | 84.24  | -9.25 |
| 1-Butyl-2,3-dimethylimidazolium bis(trifluoromethanesulfonyl) amide | 317.70 | 79.33  | 88.58  | -9.25 |
| 1-Nonylnaphthalene                                                  | 275.30 | 86.19  | 76.95  | 9.24  |
| Methylphenylboronic anhydride                                       | 225.30 | 72.47  | 63.23  | 9.24  |
| 1-Octylnaphthalene                                                  | 258.60 | 81.60  | 72.37  | 9.23  |
| 1-Decylnaphthalene                                                  | 292.30 | 90.84  | 81.61  | 9.23  |
| 4-Methoxyphenyldiallylphosphine                                     | 219.90 | 70.97  | 61.75  | 9.22  |
| Hexafluoropropyl-1,3-diisocyanate                                   | 142.00 | 31.17  | 40.38  | -9.21 |
| 2-Phenylvinyl dimethoxy phosphorus thioxide                         | 200.90 | 65.72  | 56.54  | 9.18  |
| 1-Heptylnaphthalene                                                 | 241.90 | 76.95  | 67.78  | 9.17  |
| Pentyl 1-naphthylketone                                             | 226.70 | 72.78  | 63.62  | 9.16  |
| Hexyl 1-naphthylketone                                              | 243.70 | 77.42  | 68.28  | 9.14  |
| 2-Butylnaphthalene                                                  | 192.50 | 63.37  | 54.24  | 9.13  |

|                                                                    |        |        |        |       |
|--------------------------------------------------------------------|--------|--------|--------|-------|
| 1-Iodo-2,5-dimethylbenzene                                         | 140.30 | 49.05  | 39.92  | 9.13  |
| Diphenylketene                                                     | 184.00 | 61.03  | 51.90  | 9.13  |
| 2-Iodoacetophenone                                                 | 141.50 | 49.37  | 40.25  | 9.12  |
| 1-Octyl-3-methylimidazolium<br>bis(trifluoromethanesulfonyl) amide | 369.30 | 93.61  | 102.73 | -9.12 |
| 1-Butylnaphthalene                                                 | 191.80 | 63.15  | 54.04  | 9.11  |
| 4-Tolyliodoacetylene                                               | 147.30 | 50.94  | 41.84  | 9.10  |
| Butyl 1-naphthylketone                                             | 210.00 | 68.11  | 59.04  | 9.07  |
| N-Butyl-3-methylpyridinium<br>bis(trifluoromethylsulfonyl)amide    | 321.30 | 80.49  | 89.56  | -9.07 |
| 1-Hexylnaphthalene                                                 | 225.20 | 72.27  | 63.20  | 9.07  |
| 2-Propylnaphthalene                                                | 175.70 | 58.67  | 49.63  | 9.04  |
| 1-Butyl-2,3-dimethylimidazolium<br>tetrafluoroborate               | 218.70 | 52.38  | 61.42  | -9.04 |
| Benzophenoneimine                                                  | 175.70 | 58.62  | 49.63  | 8.99  |
| 1-Decyl-3-methylimidazolium<br>bis(trifluoromethanesulfonyl) amide | 402.70 | 102.90 | 111.89 | -8.99 |
| 4-Tolyldiallylphosphine                                            | 209.50 | 67.88  | 58.90  | 8.98  |
| Hexaethylene glycol                                                | 277.80 | 68.66  | 77.63  | -8.97 |
| Phenyl-2-thienylmethanone                                          | 164.40 | 55.48  | 46.53  | 8.95  |
| 2-Isopropylnaphthalene                                             | 175.40 | 58.49  | 49.55  | 8.94  |
| 2-t-Butylnaphthalene                                               | 191.50 | 62.90  | 53.96  | 8.94  |
| 1-Acetylnaphthalene                                                | 159.50 | 54.12  | 45.18  | 8.94  |
| Trisilane                                                          | 95.70  | 36.61  | 27.68  | 8.93  |
| 1-Pentylnaphthalene                                                | 208.80 | 67.62  | 58.71  | 8.91  |
| Tri(1-ethoxycarbonylethoxy)borine                                  | 340.50 | 85.93  | 94.83  | -8.90 |
| Propyl 1-naphthylketone                                            | 193.20 | 63.32  | 54.43  | 8.89  |
| 1-Iodo-2,4-dimethylbenzene                                         | 140.30 | 48.81  | 39.92  | 8.89  |
| 1-Chloronaphthalene                                                | 140.50 | 48.86  | 39.97  | 8.89  |
| N-Butylthiazolium<br>bis(trifluoromethylsulfonyl) amide            | 296.50 | 73.89  | 82.76  | -8.87 |
| Carbon tetrafluoride                                               | 47.80  | 5.68   | 14.55  | -8.87 |
| Iophendylate                                                       | 334.60 | 102.07 | 93.21  | 8.86  |
| 1,2-Dimethylnaphthalene                                            | 158.30 | 53.68  | 44.85  | 8.83  |
| Phenyldiallylphosphine                                             | 193.10 | 63.22  | 54.40  | 8.82  |
| 1,2,2,3-Tetrabromobutane                                           | 150.10 | 51.42  | 42.61  | 8.81  |
| 2-Ethylnaphthalene                                                 | 159.20 | 53.88  | 45.10  | 8.78  |
| 1-Propylnaphthalene                                                | 175.10 | 58.24  | 49.46  | 8.78  |
| Carbon tetrabromide                                                | 101.40 | 38.02  | 29.25  | 8.77  |
| 1-Isopropylnaphthalene                                             | 174.70 | 58.12  | 49.35  | 8.77  |
| Sulfur hexafluoride                                                | 68.10  | 11.35  | 20.11  | -8.76 |
| 1,4-Dimethylnaphthalene                                            | 157.80 | 53.47  | 44.72  | 8.75  |
| 2-Chloriodobenzene                                                 | 122.00 | 43.64  | 34.90  | 8.74  |
| Benzal bromide                                                     | 135.10 | 47.22  | 38.49  | 8.73  |
| 1-Propionaphthone                                                  | 176.50 | 58.57  | 49.85  | 8.72  |
| 2-Iodotoluene                                                      | 123.50 | 44.01  | 35.31  | 8.70  |
| 2-Butylbiphenyl                                                    | 219.50 | 70.33  | 61.64  | 8.69  |
| 1,3-Dimethylnaphthalene                                            | 158.80 | 53.68  | 44.99  | 8.69  |
| 1-Methyl-1-propylpyrrolidinium<br>bis(fluorosulfonyl) amide        | 248.90 | 61.04  | 69.70  | -8.66 |



|                                                                    |        |       |       |       |
|--------------------------------------------------------------------|--------|-------|-------|-------|
| 3-Tolylthiophosphoric diaziride                                    | 216.30 | 69.41 | 60.76 | 8.65  |
| N-Ethyl-2-methylpyridinium<br>bis(trifluoromethylsulfonyl)amide    | 287.10 | 71.54 | 80.18 | -8.64 |
| Dibenzosuberone                                                    | 196.20 | 63.88 | 55.25 | 8.63  |
| 1-(3-Cyanopropyl)-pyridinium<br>bis(trifluoromethylsulfonyl) amide | 302.30 | 75.74 | 84.35 | -8.61 |
| Octamethyltrisilane                                                | 227.10 | 72.33 | 63.73 | 8.60  |
| Di-t-butyltrisulfide                                               | 199.60 | 64.73 | 56.18 | 8.55  |
| 1,3-Dipropylimidazolium<br>bis(trifluoromethylsulfonyl) amide      | 316.50 | 79.71 | 88.25 | -8.54 |
| 3-Iodotoluene                                                      | 124.30 | 44.06 | 35.53 | 8.53  |
| N-Butyl-4-methylthiazolium<br>bis(trifluoromethylsulfonyl) amide   | 312.70 | 78.68 | 87.20 | -8.52 |
| 1-Ethynaphthalene                                                  | 158.60 | 53.45 | 44.94 | 8.51  |
| 2-Chloro-1,1,2-trifluoroethyl difluoromethyl<br>ether              | 109.60 | 22.99 | 31.50 | -8.51 |
| 1-Ethoxy-1,1,2,2-tetrafluoroethane                                 | 107.40 | 22.39 | 30.89 | -8.50 |
| 1-Propylpyridinium tetrafluoroborate                               | 187.40 | 44.35 | 52.84 | -8.49 |
| 1,1,2,2-Tetrabromobutane                                           | 150.10 | 51.08 | 42.61 | 8.47  |
| 2,2,3,3-Tetrafluoro-1-propanol                                     | 89.90  | 17.62 | 26.09 | -8.47 |
| Benzhydryl chloride                                                | 184.20 | 60.42 | 51.96 | 8.46  |
| N-Propyl-2-methylpyridinium<br>bis(trifluoromethylsulfonyl)amide   | 303.70 | 76.28 | 84.74 | -8.46 |
| Trifluoromethoxy-1,2-dichloro-1,2,2-<br>trifluoroethane            | 127.80 | 28.07 | 36.49 | -8.42 |
| 1-Butylpyridinium tetrafluoroborate                                | 204.00 | 48.99 | 57.39 | -8.40 |
| 3-Methyl-1-propylpyridinium<br>bis(trifluoromethylsulfonyl)amide   | 303.90 | 76.40 | 84.79 | -8.39 |
| 1,7-Dimethylnaphthalene                                            | 159.00 | 53.43 | 45.05 | 8.38  |
| Benzophenone                                                       | 170.90 | 56.69 | 48.31 | 8.38  |
| 3-Chloro-(1,1'-biphenyl)-2-ol                                      | 176.60 | 58.25 | 49.87 | 8.38  |
| 4,4'-Diisocyanatodiphenylmethane                                   | 221.70 | 70.61 | 62.24 | 8.37  |
| 1,2-Diphenylbutane                                                 | 218.90 | 69.83 | 61.48 | 8.35  |
| Heptyl 1-naphthoate                                                | 270.50 | 83.98 | 75.63 | 8.35  |
| 2,5-Dibromotoluene                                                 | 135.90 | 47.06 | 38.71 | 8.35  |
| 2-Chloro-6-phenylphenol                                            | 176.70 | 58.25 | 49.90 | 8.35  |
| 2-Methoxy-1,1'-biphenyl                                            | 177.90 | 58.57 | 50.23 | 8.34  |
| 1-Formylnaphthalene                                                | 145.10 | 49.57 | 41.23 | 8.34  |
| Hexyl 2-naphthoate                                                 | 255.60 | 79.87 | 71.54 | 8.33  |
| 2-Iodopyridine                                                     | 103.50 | 38.15 | 29.82 | 8.33  |
| 1-Cyanonaphthalene                                                 | 143.80 | 49.18 | 40.88 | 8.30  |
| Tri(butylthio)borane                                               | 283.40 | 87.47 | 79.17 | 8.30  |
| Perfluorocyclobutene                                               | 93.50  | 18.80 | 27.08 | -8.28 |
| Pentyl 2-naphthoate                                                | 238.80 | 75.21 | 66.93 | 8.28  |
| 3-Phenyltoluene                                                    | 169.90 | 56.31 | 48.04 | 8.27  |
| 1-Butyl-2-methylpyridinium<br>tetrafluoroborate                    | 219.80 | 53.45 | 61.72 | -8.27 |
| Pentyl 1-naphthoate                                                | 236.70 | 74.63 | 66.36 | 8.27  |
| Hexyl 1-naphthoate                                                 | 253.80 | 79.31 | 71.05 | 8.26  |
| 1-Isobutyl-3-methylpyridinium                                      | 321.00 | 81.23 | 89.48 | -8.25 |

|                                                                      |        |        |        |       |
|----------------------------------------------------------------------|--------|--------|--------|-------|
| bis(trifluoromethylsulfonyl)amide                                    |        |        |        |       |
| 1,1,1-Chlorodifluoro-2,2-diiodoethane                                | 117.60 | 41.94  | 33.69  | 8.25  |
| 2-Methyl-5-phenylpyridine                                            | 165.60 | 55.07  | 46.86  | 8.21  |
| (4-Chlorophenyl)trichlorosilane                                      | 165.50 | 55.04  | 46.83  | 8.21  |
| 2,2'-Dimethylbiphenyl                                                | 186.60 | 60.82  | 52.62  | 8.20  |
| Trimethylsilylaminodimethylphenylsilane                              | 224.10 | 71.09  | 62.90  | 8.19  |
| 2-Iodothiophene                                                      | 100.00 | 37.04  | 28.86  | 8.18  |
| Thionyl bromide                                                      | 71.10  | 29.11  | 20.94  | 8.17  |
| 1-Methylnaphthalene                                                  | 142.50 | 48.68  | 40.52  | 8.16  |
| 4-Chlorodiphenyl ether                                               | 177.00 | 58.14  | 49.98  | 8.16  |
| Butyl 1-naphthoate                                                   | 220.00 | 69.93  | 61.78  | 8.15  |
| Tetrafluorosilane                                                    | 54.70  | 8.32   | 16.44  | -8.12 |
| Bis(methoxy fluoro oxophosphorus) oxide                              | 136.40 | 30.73  | 38.85  | -8.12 |
| 2,4-Dibromotoluene                                                   | 135.90 | 46.82  | 38.71  | 8.11  |
| 2-Chloroquinoline                                                    | 136.40 | 46.95  | 38.85  | 8.10  |
| Iodobenzene                                                          | 108.00 | 39.14  | 31.06  | 8.08  |
| Propyl 2-naphthoate                                                  | 205.50 | 65.88  | 57.80  | 8.08  |
| N-Butylpyridinium<br>bis(trifluoromethanesulfonyl) amide             | 302.10 | 76.22  | 84.30  | -8.08 |
| Bis(1-phenylethyl)amine                                              | 231.30 | 72.94  | 64.88  | 8.06  |
| 1,2-Dichloro-4-(trichloromethyl)benzene                              | 169.40 | 55.96  | 47.90  | 8.06  |
| Trifluoromethoxy-2-bromo-1,2,2-trifluoroethane                       | 118.60 | 25.91  | 33.97  | -8.06 |
| 2-Phenyltoluene                                                      | 170.50 | 56.25  | 48.20  | 8.05  |
| Tri(propylthio)borane                                                | 233.30 | 73.47  | 65.43  | 8.04  |
| Phenylthio(diethylamino)borane                                       | 194.80 | 62.90  | 54.87  | 8.03  |
| 1,1,2,2-Tetrabromoethane                                             | 117.80 | 41.75  | 33.75  | 8.00  |
| Pheniramine                                                          | 243.30 | 76.17  | 68.17  | 8.00  |
| Bis(ethoxy fluoro oxophosphorus) oxide                               | 170.00 | 40.08  | 48.06  | -7.98 |
| 2-Phenoxyvinyl bis(diethylamino)<br>phosphorus oxide                 | 296.40 | 90.71  | 82.73  | 7.98  |
| 3,3,4,4-Tetrafluorodihydro-2,5-furandione                            | 101.50 | 21.30  | 29.28  | -7.98 |
| Propyl 1-naphthoate                                                  | 203.60 | 65.24  | 57.28  | 7.96  |
| 1-Dodecyl-3-methylimidazolium<br>bis(trifluoromethanesulfonyl) amide | 432.40 | 112.08 | 120.04 | -7.96 |
| Perchlorocyclopentene                                                | 190.40 | 61.60  | 53.66  | 7.94  |
| Tetrabromosilane                                                     | 109.50 | 39.40  | 31.47  | 7.93  |
| 2,5-Dibromothiophene                                                 | 112.20 | 40.13  | 32.21  | 7.92  |
| Tri(1-methoxyethoxy)borine                                           | 232.90 | 57.42  | 65.32  | -7.90 |
| 1-Octylpyridinium<br>bis(trifluoromethylsulfonyl)amide               | 370.60 | 95.19  | 103.09 | -7.90 |
| 1,2-Dibromo-1-triethylsilyl-1-propene                                | 213.90 | 68.00  | 60.11  | 7.89  |
| 1-Iodo-2-triazobenzene                                               | 141.20 | 48.05  | 40.16  | 7.89  |
| Thianaphthene                                                        | 119.10 | 41.97  | 34.10  | 7.87  |
| 1-Butyl-1-methylpyrrolidinium<br>trifluoromethanesulfonate           | 243.80 | 60.44  | 68.31  | -7.87 |
| 4-Ethylphenyldipropylphosphine                                       | 237.90 | 74.54  | 66.69  | 7.85  |
| 4-Iodo-1,2-butadiene                                                 | 92.00  | 34.52  | 26.67  | 7.85  |
| 5-Methylbenzo[b]thiophene                                            | 135.90 | 46.56  | 38.71  | 7.85  |
| 2-Methylnaphthalene                                                  | 142.90 | 48.47  | 40.63  | 7.84  |

|                                                                 |        |        |        |       |
|-----------------------------------------------------------------|--------|--------|--------|-------|
| Ethyl 2-naphthoate                                              | 188.70 | 61.02  | 53.19  | 7.83  |
| 1-Chloro-4-((chloromethyl)thio)benzene                          | 146.50 | 49.44  | 41.62  | 7.82  |
| Ethyl 1-Naphthoate                                              | 186.80 | 60.47  | 52.67  | 7.80  |
| Bis(4-tolyl) ether                                              | 195.40 | 62.82  | 55.03  | 7.79  |
| alpha-Naphthaleneazide                                          | 159.70 | 53.00  | 45.24  | 7.76  |
| Heptyl 2-naphthaleneacetate                                     | 287.40 | 88.02  | 80.26  | 7.76  |
| Refrigerant 115                                                 | 83.50  | 16.59  | 24.34  | -7.75 |
| Hexyl 2-naphthaleneacetate                                      | 271.00 | 83.51  | 75.77  | 7.74  |
| N,N'-Dibenzyl-1,2-ethanediamine                                 | 244.70 | 76.29  | 68.55  | 7.74  |
| 1,1,2,2-Tetrafluoro-1,2-dinitroethane                           | 111.20 | 24.21  | 31.94  | -7.73 |
| Diphenoxydiisothiocyanatosilane                                 | 267.10 | 82.42  | 74.70  | 7.72  |
| 1-Methoxynaphthalene                                            | 152.20 | 50.90  | 43.18  | 7.72  |
| 7-Methylquinoline                                               | 138.40 | 47.10  | 39.40  | 7.70  |
| Tris(ethylthio)borane                                           | 183.30 | 59.41  | 51.71  | 7.70  |
| Dibromofluorophosphorus thioxide                                | 91.10  | 34.12  | 26.42  | 7.70  |
| Tri(isopentyl)silyl iodide                                      | 310.70 | 94.34  | 86.66  | 7.68  |
| Butyl 2-naphthaleneacetate                                      | 237.40 | 74.23  | 66.55  | 7.68  |
| 1-Bromo-4-vinylbenzene                                          | 128.90 | 44.46  | 36.79  | 7.67  |
| Methyldichloro-2,4-dichlorophenoxysilane                        | 189.00 | 60.94  | 53.28  | 7.66  |
| 1-Naphthol                                                      | 135.40 | 46.23  | 38.57  | 7.66  |
| (trans-2-Bromovinyl)benzene                                     | 128.90 | 44.44  | 36.79  | 7.65  |
| 2-Chlorobenzothiazole                                           | 128.10 | 44.22  | 36.57  | 7.65  |
| 1,1-Diphenylethane                                              | 186.80 | 60.30  | 52.67  | 7.63  |
| 1-Methyl-2-pyrrolidonium tetrafluoroborate                      | 157.60 | 37.04  | 44.66  | -7.62 |
| N-Decylpyridinium<br>bis(trifluoromethanesulfonyl) amide        | 403.60 | 104.52 | 112.14 | -7.62 |
| Pentyl 2-naphthaleneacetate                                     | 254.20 | 78.77  | 71.16  | 7.61  |
| 4-Iodotoluene                                                   | 124.30 | 43.14  | 35.53  | 7.61  |
| 2-Methyldiphenylmethane                                         | 186.60 | 60.22  | 52.62  | 7.60  |
| Dipropylphenylthioborane                                        | 213.80 | 67.67  | 60.08  | 7.59  |
| Dimethyldiphenoxysilane                                         | 228.00 | 71.56  | 63.97  | 7.59  |
| Heptyl 1-naphthaleneacetate                                     | 287.00 | 87.72  | 80.16  | 7.56  |
| N-Dodecylpyridinium<br>bis(trifluoromethanesulfonyl) amide      | 436.80 | 113.68 | 121.24 | -7.56 |
| (Ethoxy fluoro oxophosphorus) (diethoxy<br>oxophosphorus) oxide | 208.00 | 50.93  | 58.49  | -7.56 |
| 2-Benzylthiophene                                               | 162.50 | 53.56  | 46.01  | 7.55  |
| alpha-D-Glucose                                                 | 153.60 | 36.02  | 43.57  | -7.55 |
| Propyl 2-naphthaleneacetate                                     | 220.90 | 69.57  | 62.02  | 7.55  |
| 2-Phenoxyvinyl bis(dibutylamino)<br>phosphorus oxide            | 430.30 | 127.00 | 119.46 | 7.54  |
| 2-Methylquinoline                                               | 138.40 | 46.93  | 39.40  | 7.53  |
| 3-Methylquinoline                                               | 138.50 | 46.95  | 39.42  | 7.53  |
| 6-Methylquinoline                                               | 138.50 | 46.95  | 39.42  | 7.53  |
| Ethoglucid                                                      | 254.70 | 63.77  | 71.30  | -7.53 |
| 4-Methoxyphenyldipentylphosphine                                | 297.40 | 90.53  | 83.01  | 7.52  |
| 1-Methoxy-4-methyl-2,6-di(3-hexen-2-<br>yl)benzene              | 307.20 | 93.21  | 85.70  | 7.51  |
| 1,2,2-Tris(isopropylthio)-propane                               | 263.50 | 81.22  | 73.71  | 7.51  |
| Methyl trifluoroacetate                                         | 88.30  | 18.15  | 25.65  | -7.50 |

|                                                                     |        |        |        |       |
|---------------------------------------------------------------------|--------|--------|--------|-------|
| 1-Butyl-4-methylpyridinium tetrafluoroborate                        | 219.00 | 54.00  | 61.50  | -7.50 |
| 1,1-Diphenylbutane                                                  | 219.50 | 69.14  | 61.64  | 7.50  |
| S-Methyl-dimethylthioformamidium bis(trifluoromethylsulfonyl) amide | 258.90 | 64.95  | 72.45  | -7.50 |
| Butyl 1-naphthaleneacetate                                          | 236.90 | 73.88  | 66.41  | 7.47  |
| S-Ethyl-dimethylthioformamidium bis(trifluoromethylsulfonyl) amide  | 276.60 | 69.84  | 77.30  | -7.46 |
| Pentyl 1-naphthaleneacetate                                         | 253.70 | 78.48  | 71.02  | 7.46  |
| 1,3-Diphenylpropane                                                 | 202.80 | 64.51  | 57.06  | 7.45  |
| Butyl trifluoroacetate                                              | 138.40 | 31.95  | 39.40  | -7.45 |
| Bis(butoxy fluoro oxophosphorus) oxide                              | 235.70 | 58.64  | 66.08  | -7.44 |
| 1-Ethoxynaphthalene                                                 | 169.00 | 55.23  | 47.79  | 7.44  |
| Ethyl trifluoroacetate                                              | 105.00 | 22.80  | 30.24  | -7.44 |
| Lupeol                                                              | 444.10 | 130.68 | 123.25 | 7.43  |
| Refrigerant 216                                                     | 118.50 | 26.51  | 33.94  | -7.43 |
| 3-Phenoxybenzaldehyde                                               | 181.90 | 58.75  | 51.33  | 7.42  |
| Methyl 1-naphthoate                                                 | 169.80 | 55.43  | 48.01  | 7.42  |
| 2,4-Dimethylquinoline                                               | 154.40 | 51.20  | 43.79  | 7.41  |
| Dibenzylamine                                                       | 199.20 | 63.48  | 56.07  | 7.41  |
| 1,3-Dibromobenzene                                                  | 120.20 | 41.80  | 34.40  | 7.40  |
| Hexyl 1-naphthaleneacetate                                          | 270.20 | 82.94  | 75.55  | 7.39  |
| 1,1-Dichloro-2,2-diiodoethylene                                     | 98.50  | 35.84  | 28.45  | 7.39  |
| 1-Methyl-4-benzylbenzene                                            | 186.80 | 60.05  | 52.67  | 7.38  |
| 4-Tolylphosphorous diaziride                                        | 201.10 | 63.97  | 56.59  | 7.38  |
| 5-Methylquinoline                                                   | 137.60 | 46.55  | 39.18  | 7.37  |
| Trichloriodomethane                                                 | 95.20  | 34.92  | 27.55  | 7.37  |
| 1,2-Dichlorohexafluoropropane                                       | 118.40 | 26.54  | 33.91  | -7.37 |
| Perfluorotoluene                                                    | 137.90 | 31.90  | 39.26  | -7.36 |
| Ethyl 2-naphthaleneacetate                                          | 204.30 | 64.83  | 57.47  | 7.36  |
| Methyltribromosilane                                                | 108.50 | 38.55  | 31.20  | 7.35  |
| Propyl 1-naphthaleneacetate                                         | 220.40 | 69.24  | 61.89  | 7.35  |
| 2,2,3-Trichloro-1,1,1,3,4,4,4-heptafluorobutane                     | 151.50 | 35.64  | 42.99  | -7.35 |
| 1-Bromo-3-vinylbenzene                                              | 128.90 | 44.14  | 36.79  | 7.35  |
| 2-(Methylthio)aniline                                               | 129.30 | 44.24  | 36.90  | 7.34  |
| Diphenylmethane                                                     | 170.60 | 55.56  | 48.23  | 7.33  |
| 8-Methylquinoline                                                   | 138.30 | 46.70  | 39.37  | 7.33  |
| 2-Ethoxynaphthalene                                                 | 169.30 | 55.19  | 47.87  | 7.32  |
| Dichlorophenylphosphine                                             | 133.40 | 45.34  | 38.03  | 7.31  |
| Diphenylmethylamine                                                 | 182.00 | 58.67  | 51.36  | 7.31  |
| 1-Hexyl-3,5-dimethylpyridinium bis(trifluoromethylsulfonyl)amide    | 369.80 | 95.56  | 102.87 | -7.31 |
| Trifluoromethane                                                    | 42.90  | 5.90   | 13.20  | -7.30 |
| Dibutyltrisulfide                                                   | 201.70 | 64.05  | 56.76  | 7.29  |
| N,O-Dibenzyl-N-ethylhydroxylamine                                   | 240.70 | 74.74  | 67.46  | 7.28  |
| 1,3-Bis(1-methylethenyl)benzene                                     | 169.00 | 55.07  | 47.79  | 7.28  |
| Trifluoroacetic acid                                                | 71.00  | 13.66  | 20.91  | -7.25 |
| (1-Bromovinyl)benzene                                               | 128.50 | 43.93  | 36.68  | 7.25  |
| Hexachlorobutadiene                                                 | 150.00 | 49.82  | 42.58  | 7.24  |

|                                                                    |        |        |        |       |
|--------------------------------------------------------------------|--------|--------|--------|-------|
| Perchlorocyclopentadiene                                           | 159.20 | 52.34  | 45.10  | 7.24  |
| 1,2,2-Tris(propylthio)-propane                                     | 266.10 | 81.66  | 74.42  | 7.24  |
| 2-Iodo-1,3-butadiene                                               | 91.50  | 33.76  | 26.53  | 7.23  |
| Methyl 2-benzoylbenzoate                                           | 217.10 | 68.21  | 60.98  | 7.23  |
| 1-Azepanyl thiophosphoryl dichloride                               | 176.30 | 57.01  | 49.79  | 7.22  |
| 1,1,1-Trifluoro-2-propanol                                         | 85.10  | 17.56  | 24.78  | -7.22 |
| 1-Methyl-3-phenoxybenzene                                          | 179.00 | 57.74  | 50.53  | 7.21  |
| Ethyl 1-naphthaleneacetate                                         | 203.80 | 64.53  | 57.33  | 7.20  |
| (cis-2-Bromovinyl)benzene                                          | 127.80 | 43.67  | 36.49  | 7.18  |
| 1,2-Dibromobenzene                                                 | 120.00 | 41.52  | 34.35  | 7.17  |
| Tri(methoxyethyl) phosphate                                        | 243.20 | 60.98  | 68.14  | -7.16 |
| Methyl 2-naphthaleneacetate                                        | 187.50 | 60.02  | 52.86  | 7.16  |
| 8-Chloroquinoline                                                  | 136.30 | 45.97  | 38.82  | 7.15  |
| 1,2-Dibromo-1,3,4,4-tetrachlorobutane                              | 170.00 | 55.21  | 48.06  | 7.15  |
| 2-Methylbenzothiazole                                              | 128.90 | 43.93  | 36.79  | 7.14  |
| 4-(Methylthio)aniline                                              | 129.40 | 44.05  | 36.93  | 7.12  |
| n-Propyl trifluoacetate                                            | 121.70 | 27.70  | 34.82  | -7.12 |
| Pentyl cyclohexyloxy dithiophosphinic acid                         | 249.70 | 77.04  | 69.92  | 7.12  |
| 1,2,2-Tris(butylthio)-propane                                      | 316.50 | 95.36  | 88.25  | 7.11  |
| 1-Bromo-2-vinylbenzene                                             | 128.50 | 43.79  | 36.68  | 7.11  |
| Methyldichloro-2-(2,4-dichlorophenoxy)ethylsilane                  | 225.20 | 70.31  | 63.20  | 7.11  |
| Tetraglycol                                                        | 191.80 | 46.94  | 54.04  | -7.10 |
| 4-Methylquinoline                                                  | 138.20 | 46.44  | 39.34  | 7.10  |
| 2,2,2-Trifluoroethanol                                             | 68.50  | 13.13  | 20.22  | -7.09 |
| Benzylisothiocyanate                                               | 135.50 | 45.69  | 38.60  | 7.09  |
| 1,2,2-Tris(isobutylthio)-propane                                   | 315.30 | 94.97  | 87.92  | 7.05  |
| 2-Hydroxyethylammonium lactate                                     | 146.90 | 34.69  | 41.73  | -7.04 |
| 2-Naphthyl chlorofluorophosphate                                   | 181.30 | 58.17  | 51.16  | 7.01  |
| Diethoxydiphenylsilane                                             | 264.80 | 81.07  | 74.07  | 7.00  |
| 3-Tolylphosphorous diaziride                                       | 201.40 | 63.67  | 56.68  | 6.99  |
| 2,4,6-Tris(difluoromethyl)-s-triazine                              | 148.10 | 35.07  | 42.06  | -6.99 |
| 4-Methoxyphenyldibutylphosphine                                    | 264.10 | 80.86  | 73.87  | 6.99  |
| Phosphoric acid                                                    | 64.90  | 12.26  | 19.24  | -6.98 |
| 1-Octyl-3-methylpyridinium tetrafluoroborate                       | 285.40 | 72.74  | 79.72  | -6.98 |
| Allicin                                                            | 141.60 | 47.25  | 40.27  | 6.98  |
| Methyl 1-naphthylacetate                                           | 187.30 | 59.77  | 52.81  | 6.96  |
| 1-Butyl-3-methylimidazolium tris(trifluoromethylsulfonyl)methide   | 356.50 | 92.26  | 99.22  | -6.96 |
| S-Butyl-dimethylthioformamidium bis(trifluoromethylsulfonyl) amide | 309.10 | 79.26  | 86.22  | -6.96 |
| 2-Ethoxy-1,2-diphenylethanone                                      | 231.40 | 71.85  | 64.90  | 6.95  |
| Butyl cyclohexyloxy dithiophosphinic acid                          | 233.30 | 72.37  | 65.43  | 6.94  |
| Diethyltrisulfide                                                  | 134.90 | 45.38  | 38.44  | 6.94  |
| 1-(1,1,2,2-Tetrafluoroethoxy)octadecane                            | 374.60 | 97.24  | 104.18 | -6.94 |
| Hexyl cyclohexyloxy dithiophosphinic acid                          | 266.40 | 81.44  | 74.50  | 6.94  |
| Tri(ethoxyethyl) phosphate                                         | 293.30 | 74.96  | 81.88  | -6.92 |
| Bis(butylthio) 2-(diethylmethylsilyl)ethyl borane                  | 340.60 | 101.77 | 94.86  | 6.91  |

|                                                                |        |        |        |       |
|----------------------------------------------------------------|--------|--------|--------|-------|
| (2-Phenylethyl)trichlorosilane                                 | 183.30 | 58.62  | 51.71  | 6.91  |
| Diphenyl ether                                                 | 163.00 | 53.04  | 46.14  | 6.90  |
| Ethyl-phenyl-propylthio-phosphinate                            | 214.00 | 67.02  | 60.13  | 6.89  |
| 2-Methylindole                                                 | 129.20 | 43.76  | 36.87  | 6.89  |
| Diphenylacetaldehyde                                           | 188.60 | 60.04  | 53.17  | 6.87  |
| Glyceryltriacetate                                             | 197.30 | 48.68  | 55.55  | -6.87 |
| Isobutyl allyloxy dithiophosphinic acid                        | 188.10 | 59.89  | 53.03  | 6.86  |
| 1-Chloro-2-(trichloromethyl)benzene                            | 154.40 | 50.64  | 43.79  | 6.85  |
| cis-1,2-Bis(trimethylsilyl)-3,3-dichlorocyclopropane           | 230.00 | 71.37  | 64.52  | 6.85  |
| Dibenzyl ether                                                 | 196.70 | 62.20  | 55.39  | 6.81  |
| Triethyl acetylcitrate                                         | 288.00 | 73.62  | 80.43  | -6.81 |
| Tetracosamethylhendecasiloxane                                 | 762.00 | 217.25 | 210.44 | 6.81  |
| Dimethoxydiphenylsilane                                        | 231.40 | 71.70  | 64.90  | 6.80  |
| 1,3-Bis(dimethoxyboryl)propane                                 | 198.00 | 48.96  | 55.74  | -6.78 |
| 4-Chlorobenzenemethanethiol                                    | 132.30 | 44.50  | 37.72  | 6.78  |
| Quinoline                                                      | 122.10 | 41.69  | 34.93  | 6.76  |
| 2,5-Dichlorostyrene                                            | 138.60 | 46.21  | 39.45  | 6.76  |
| Difluorodinitromethane                                         | 84.70  | 17.91  | 24.67  | -6.76 |
| 1,1,1-Tris(methylthio)ethane                                   | 149.50 | 49.18  | 42.44  | 6.74  |
| Tetramethyl orthocarbonate                                     | 132.90 | 31.15  | 37.89  | -6.74 |
| 1,2,2-Tribromobutane                                           | 132.30 | 44.46  | 37.72  | 6.74  |
| Dimethyltrisulfide                                             | 101.50 | 36.00  | 29.28  | 6.72  |
| 1-Methoxy-4-Methyl-2,6-dicrotylbenzene                         | 241.60 | 74.42  | 67.70  | 6.72  |
| Isoquinaldine                                                  | 138.10 | 46.03  | 39.31  | 6.72  |
| Triethyl orthothioformate                                      | 184.00 | 58.61  | 51.90  | 6.71  |
| 2,2,4,4,6,6-Hexamethylcyclotrisilazane                         | 203.30 | 63.90  | 57.20  | 6.70  |
| 4-Methyl-2,6-di(3-hexen-2-yl)phenol                            | 292.50 | 88.36  | 81.66  | 6.70  |
| Benzothiazole                                                  | 113.80 | 39.34  | 32.65  | 6.69  |
| 4-Bromophenyltrimethylsilane                                   | 178.90 | 57.19  | 50.51  | 6.68  |
| 1,1,1-Trifluoroethane                                          | 59.60  | 11.10  | 17.78  | -6.68 |
| 2-Chloroethylthiobenzene                                       | 149.20 | 49.02  | 42.36  | 6.66  |
| 1,4-Divinylbenzene                                             | 137.50 | 45.81  | 39.15  | 6.66  |
| Bis(trimethoxysilyl)amine                                      | 224.20 | 56.30  | 62.93  | -6.63 |
| 1,2,2-Tribromopropane                                          | 116.10 | 39.91  | 33.28  | 6.63  |
| Tetraethoxymethane                                             | 200.00 | 49.67  | 56.29  | -6.62 |
| 1-(1,1,2,2-Tetrafluoroethoxy)dodecane                          | 274.50 | 70.11  | 76.73  | -6.62 |
| Phenylphosphorous diaziridide                                  | 185.00 | 58.77  | 52.18  | 6.59  |
| Glycerol tricaproate                                           | 397.20 | 103.79 | 110.38 | -6.59 |
| 3-Chlorobenzotrichloride                                       | 155.30 | 50.60  | 44.03  | 6.57  |
| Fenchlorphos                                                   | 223.70 | 69.36  | 62.79  | 6.57  |
| 2,3-Dihydro-4H-1-benzothiopyran-4-one                          | 143.50 | 47.35  | 40.80  | 6.55  |
| 1-Ethyl-3-methylimidazolium 1,1,2,2-tetrafluoroethanesulfonate | 215.20 | 53.91  | 60.46  | -6.55 |
| Trifluoroborane                                                | 40.50  | 6.00   | 12.54  | -6.54 |
| Chlorthion                                                     | 217.30 | 67.58  | 61.04  | 6.54  |
| Isopentyl propoxy dithiophosphinic acid                        | 209.40 | 65.41  | 58.87  | 6.54  |
| cis-1,2-Dis(trimethylsilyl)-ethylene                           | 182.00 | 57.88  | 51.36  | 6.52  |
| 3-Hydroxydiphenylether                                         | 171.70 | 55.04  | 48.53  | 6.51  |

|                                                      |        |        |        |       |
|------------------------------------------------------|--------|--------|--------|-------|
| Pentafluorophenol                                    | 116.80 | 26.97  | 33.47  | -6.50 |
| Diethyl dicarbonate                                  | 145.30 | 34.79  | 41.29  | -6.50 |
| 2-Bromo-N,N-dimethylaniline                          | 145.20 | 47.76  | 41.26  | 6.50  |
| Melamine                                             | 104.10 | 36.48  | 29.99  | 6.49  |
| (4-Bromophenoxy)trimethylsilane                      | 184.60 | 58.55  | 52.07  | 6.48  |
| 1,3-Bis(trimethylsiloxy)benzene                      | 246.00 | 75.39  | 68.91  | 6.48  |
| Tripropylene glycol                                  | 214.20 | 53.72  | 60.19  | -6.47 |
| 4-Trimethylsiloxyphenyltrimethylsilane               | 243.30 | 74.63  | 68.17  | 6.46  |
| Benzeneazoethane                                     | 135.10 | 44.92  | 38.49  | 6.43  |
| 1,2,3-Tribromobutane                                 | 131.90 | 44.03  | 37.61  | 6.42  |
| N-Hexyl-N-methylmorpholinium N-acetylvalinate        | 354.50 | 92.26  | 98.67  | -6.41 |
| 1,4-Butanediol diglycidyl ether                      | 202.10 | 50.46  | 56.87  | -6.41 |
| Vinylidoacetylene                                    | 87.30  | 31.78  | 25.38  | 6.40  |
| 4-(3-Phenylpropyl)pyridine                           | 199.10 | 62.44  | 56.05  | 6.39  |
| iso-Pentyl isopropoxy dithiophosphinic acid          | 210.20 | 65.48  | 59.09  | 6.39  |
| 1-Methoxy-2-methyl-4,6-diclotylbenzene               | 241.90 | 74.17  | 67.78  | 6.39  |
| Isobutyl isopropoxy dithiophosphinic acid            | 193.60 | 60.92  | 54.54  | 6.38  |
| Triethylsilyl iodide                                 | 162.00 | 52.25  | 45.87  | 6.38  |
| 1,3-Diacetin                                         | 161.40 | 39.34  | 45.71  | -6.37 |
| (Isopropylthio)benzene                               | 150.10 | 48.97  | 42.61  | 6.36  |
| 1,3-Bis(bromomethyl)tetramethyldisiloxane            | 206.40 | 64.41  | 58.05  | 6.36  |
| N-Propyl-N-methylmorpholinium N-acetylalaninate      | 271.60 | 69.57  | 75.93  | -6.36 |
| N-Ethyl-N-methylmorpholinium N-acetylleucinate       | 304.70 | 78.65  | 85.01  | -6.36 |
| Isoquinoline                                         | 122.20 | 41.31  | 34.95  | 6.36  |
| Tetrachlorothiophene                                 | 132.20 | 44.05  | 37.70  | 6.35  |
| 1,1,2-Tribromopropane                                | 116.10 | 39.63  | 33.28  | 6.35  |
| alpha-Humulene                                       | 219.30 | 67.93  | 61.59  | 6.34  |
| Dimethyl oxalate                                     | 102.80 | 23.29  | 29.63  | -6.34 |
| 1-Butyl-3-methylimidazolium trifluoromethylsulfonate | 229.00 | 57.91  | 64.25  | -6.34 |
| Dibenzyl malonate                                    | 259.80 | 79.02  | 72.69  | 6.33  |
| Bis(2-mercaptoethyl) sulfide                         | 134.00 | 44.51  | 38.19  | 6.32  |
| N-Butylthiazolium difluoro(oxalato)borate            | 230.80 | 58.43  | 64.74  | -6.31 |
| 2-Butylthiovinyl dichloro phosphorus oxide           | 182.70 | 57.85  | 51.55  | 6.30  |
| Vitamin E acetate                                    | 500.90 | 145.12 | 138.82 | 6.30  |
| Bromiodomethane                                      | 71.10  | 27.23  | 20.94  | 6.29  |
| 1,2,4-Tribromobutane                                 | 132.20 | 43.98  | 37.70  | 6.28  |
| Bromal                                               | 102.20 | 35.75  | 29.47  | 6.28  |
| Glyceryl tributanoate                                | 296.10 | 76.37  | 82.65  | -6.28 |
| 4-Methylpentyl isopropoxy dithiophosphinic acid      | 227.10 | 70.00  | 63.73  | 6.27  |
| 1-Ethyl-3-methylimidazolium imidodisulfuryl fluoride | 214.70 | 54.05  | 60.32  | -6.27 |
| Phenylaminotriethylsilane                            | 218.50 | 67.64  | 61.37  | 6.27  |
| Bis(t-butylthio)borane                               | 197.10 | 61.77  | 55.50  | 6.27  |
| 1,1,3,3-Tetramethoxypropane                          | 165.80 | 40.64  | 46.91  | -6.27 |
| 4-Benzylpyridine                                     | 165.90 | 53.21  | 46.94  | 6.27  |

|                                                                  |        |        |        |       |
|------------------------------------------------------------------|--------|--------|--------|-------|
| Tribromoethylene                                                 | 94.60  | 33.65  | 27.38  | 6.27  |
| 3,5-Dimethyl-1-phenyl-1H-pyrazole                                | 168.00 | 53.77  | 47.52  | 6.25  |
| 1-Fluoronaphthalene                                              | 131.40 | 43.73  | 37.48  | 6.25  |
| Triethyleneglycol                                                | 148.80 | 36.01  | 42.25  | -6.24 |
| Dibutylphenylthioborane                                          | 250.80 | 76.46  | 70.23  | 6.23  |
| 2,2,3-Tribromobutane                                             | 132.10 | 43.90  | 37.67  | 6.23  |
| Hexyl phenyl sulfide                                             | 201.60 | 62.96  | 56.73  | 6.23  |
| Tetradecyl trihexylphosphonium bis(trifluoromethylsulfonyl)amide | 719.50 | 192.57 | 198.78 | -6.21 |
| Phenylphosphine                                                  | 105.50 | 36.58  | 30.37  | 6.21  |
| 1-(Bromomethyl)-2-methylbenzene                                  | 133.10 | 44.15  | 37.94  | 6.21  |
| 1-Phenylpyrazole                                                 | 136.10 | 44.97  | 38.77  | 6.20  |
| N-Butyl-N-methylmorpholinium N-acetylalaninate                   | 288.30 | 74.32  | 80.51  | -6.19 |
| Methyldichloro-2-(4-chlorophenoxy)ethylsilane                    | 211.00 | 65.49  | 59.31  | 6.18  |
| Benzylsalicylate                                                 | 207.10 | 64.42  | 58.24  | 6.18  |
| 1,5-Bis(diethoxyboryl)pentane                                    | 298.50 | 77.13  | 83.31  | -6.18 |
| Triisopropylphenylsilane                                         | 254.80 | 77.50  | 71.32  | 6.18  |
| Diphenylphosphinic chloride                                      | 189.10 | 59.47  | 53.30  | 6.17  |
| Pentyl isopropoxy dithiophosphinic acid                          | 210.90 | 65.44  | 59.28  | 6.16  |
| Isopropyl trifluoroacetate                                       | 121.00 | 28.47  | 34.62  | -6.15 |
| N-Ethyl-N-methylmorpholinium N-acetylalaninate                   | 255.00 | 65.23  | 71.38  | -6.15 |
| Benzyl benzoate                                                  | 200.00 | 62.44  | 56.29  | 6.15  |
| Bis(2-hydroxyethyl)ammonium hexanoate                            | 230.40 | 58.49  | 64.63  | -6.14 |
| 4-Fluoroiodobenzene                                              | 112.90 | 38.54  | 32.40  | 6.14  |
| Difluoroacetic acid                                              | 66.10  | 13.44  | 19.57  | -6.13 |
| Tributylisothiocyanatosilane                                     | 271.60 | 82.05  | 75.93  | 6.12  |
| 6-Vinyl-6-methyl-1-isopropyl-3-(1-methylethylidene)cyclohexene   | 227.50 | 69.94  | 63.84  | 6.10  |
| 4-Methylpentyl dichloro phosphorus thioxide                      | 178.80 | 56.57  | 50.48  | 6.09  |
| Diethylamino bromofluorothiophosphate                            | 147.30 | 47.93  | 41.84  | 6.09  |
| 2-Bromo-4-phenyl-1-butene                                        | 161.10 | 51.71  | 45.62  | 6.09  |
| 2-Chloro-1-trichloromethoxybenzene                               | 164.10 | 52.53  | 46.45  | 6.08  |
| 1,6-Bis(diethoxyboryl)hexane                                     | 315.20 | 81.81  | 87.89  | -6.08 |
| Pentyl phenyl sulfide                                            | 184.90 | 58.23  | 52.15  | 6.08  |
| 1,1,2-Tribromobutane                                             | 132.40 | 43.83  | 37.75  | 6.08  |
| 1,3,5-Trisilacyclohexane                                         | 131.90 | 43.69  | 37.61  | 6.08  |
| 3-Bromoaniline                                                   | 113.20 | 38.56  | 32.48  | 6.08  |
| Ethyl difluorophosphate                                          | 90.90  | 20.30  | 26.37  | -6.07 |
| N-Hexyl-N-methylmorpholinium N-acetylleucinate                   | 371.40 | 97.24  | 103.30 | -6.06 |
| 1,3-Bis(dibutoxyboryl)propane                                    | 398.70 | 104.73 | 110.79 | -6.06 |
| 1-Bromo-4-isopropylbenzene                                       | 150.40 | 48.75  | 42.69  | 6.06  |
| 1-(Bromomethyl)-3-methylbenzene                                  | 133.20 | 44.03  | 37.97  | 6.06  |
| 1-Heptyltrifluorosilane                                          | 167.50 | 41.32  | 47.38  | -6.06 |
| N-Butyl-4-methylthiazolium difluoro(oxalato)borate               | 247.40 | 63.24  | 69.29  | -6.05 |
| Pentyl hexyloxy dithiophosphinic acid                            | 261.90 | 79.31  | 73.27  | 6.04  |



|                                                      |        |        |        |       |
|------------------------------------------------------|--------|--------|--------|-------|
| Diphenyl chlorophosphate                             | 213.50 | 66.03  | 60.00  | 6.03  |
| 2-Bromo-5-chlorothiophene                            | 108.00 | 37.09  | 31.06  | 6.03  |
| Benzyltrimethylsilane                                | 173.70 | 55.11  | 49.08  | 6.03  |
| Methylsilanetriol triacetate                         | 185.40 | 46.27  | 52.29  | -6.02 |
| Diethyl tartrate                                     | 182.40 | 45.45  | 51.47  | -6.02 |
| Tetrapropoxymethane                                  | 266.80 | 68.60  | 74.61  | -6.01 |
| 2-Ethylthiovinyl dichloro phosphorus oxide           | 149.30 | 48.40  | 42.39  | 6.01  |
| Phenyltrichlorosilane                                | 151.20 | 48.92  | 42.91  | 6.01  |
| Phenyl n-propyl sulfide                              | 151.70 | 49.05  | 43.04  | 6.01  |
| Pentyl propoxy dithiophosphinic acid                 | 211.90 | 65.56  | 59.56  | 6.00  |
| 1,1,1,2,3,3,3-Heptachloropropane                     | 155.70 | 50.14  | 44.14  | 6.00  |
| Bis(butylthio) octyl borane                          | 331.30 | 98.30  | 92.31  | 5.99  |
| 4-Chlorostyrene                                      | 124.60 | 41.60  | 35.61  | 5.99  |
| 1,1,1-Tripropoxypropane                              | 239.90 | 61.26  | 67.24  | -5.98 |
| Hexaethylbenzene                                     | 276.80 | 83.33  | 77.36  | 5.97  |
| 2-Hydroxyethylammonium propionate                    | 137.90 | 33.29  | 39.26  | -5.97 |
| Hexyl isopentoxy dithiophosphinic acid               | 261.50 | 79.13  | 73.16  | 5.97  |
| Butyl phenyl sulfide                                 | 168.40 | 53.59  | 47.63  | 5.96  |
| Glycerol 1-butanoate                                 | 158.10 | 38.84  | 44.80  | -5.96 |
| Phosphoric acid ethylester                           | 99.00  | 22.63  | 28.59  | -5.96 |
| 4-(Ethylthio)-toluene                                | 151.30 | 48.89  | 42.93  | 5.96  |
| Chlorophenylsilane                                   | 124.40 | 41.51  | 35.56  | 5.95  |
| o-Tolylamino(diethylamino)borane                     | 204.50 | 63.48  | 57.53  | 5.95  |
| Trifluoroacetoacetic acid ethylester                 | 139.50 | 33.75  | 39.70  | -5.95 |
| Chlordimeform                                        | 181.20 | 57.07  | 51.14  | 5.93  |
| Butyl 4-methylpentoxy dithiophosphinic acid          | 244.80 | 74.51  | 68.58  | 5.93  |
| 3,3'-Difluorobiphenyl                                | 163.40 | 52.18  | 46.25  | 5.93  |
| iso-Amyl dichloro phosphorus thioxide                | 162.10 | 51.82  | 45.90  | 5.92  |
| 2-(2-(2-Butoxyethoxy)ethoxy)ethanol                  | 216.30 | 54.85  | 60.76  | -5.91 |
| Hexafluorobenzene                                    | 112.90 | 26.49  | 32.40  | -5.91 |
| N-Hexyl-N-methylmorpholinium N-acetylalaninate       | 320.40 | 83.42  | 89.32  | -5.90 |
| Hexyl hexyloxy dithiophosphinic acid                 | 278.70 | 83.77  | 77.88  | 5.89  |
| L-Alanine 2-methylpropyl ester dodecyl sulfate       | 407.80 | 107.40 | 113.29 | -5.89 |
| Tributyl citrate                                     | 352.20 | 92.16  | 98.04  | -5.88 |
| Diethoxy fluorophosphate                             | 129.00 | 30.94  | 36.82  | -5.88 |
| Trichloro-2-phenoxyethylsilane                       | 193.70 | 60.44  | 54.56  | 5.88  |
| Hexyl dichloro phosphorus thioxide                   | 179.30 | 56.49  | 50.61  | 5.88  |
| 2-Methylbenzimidazole                                | 124.40 | 41.43  | 35.56  | 5.87  |
| N-Ethyl-N-methylmorpholinium N-acetylvalinate        | 286.00 | 74.01  | 79.88  | -5.87 |
| 2-(2-Butoxyethoxy)ethyl acetate                      | 209.90 | 53.16  | 59.01  | -5.85 |
| 1,2,4-Triisopropylbenzene                            | 224.50 | 68.86  | 63.01  | 5.85  |
| 1-Ethyl-3-methylimidazolium trifluoromethylsulfonate | 194.40 | 48.91  | 54.76  | -5.85 |
| 1-Butyl-1-methylpyrrolidinium acetate                | 216.60 | 55.00  | 60.85  | -5.85 |
| (1-Bromoethyl)benzene                                | 133.30 | 43.84  | 38.00  | 5.84  |
| 2-Benzylpyridine                                     | 165.50 | 52.67  | 46.83  | 5.84  |
| 4-Methylpentyl 4-methylpentoxy                       | 277.70 | 83.44  | 77.60  | 5.84  |

|                                                               |        |        |        |       |
|---------------------------------------------------------------|--------|--------|--------|-------|
| dithiophosphinic acid                                         |        |        |        |       |
| N-(2-Pyridinylmethyl)-2-pyridinemethanamine                   | 190.50 | 59.52  | 53.69  | 5.83  |
| alpha-Pentylcinnamaldehyde                                    | 211.10 | 65.17  | 59.34  | 5.83  |
| beta-Chlorostyrene                                            | 124.70 | 41.47  | 35.64  | 5.83  |
| 1,3-Difluoro-2-propanol                                       | 80.30  | 17.63  | 23.46  | -5.83 |
| Dichloriodomethane                                            | 81.10  | 29.50  | 23.68  | 5.82  |
| S-Ethyl-dimethylthioformamidium difluorooxalylborate          | 212.30 | 53.86  | 59.67  | -5.81 |
| Hexyl octyloxy dithiophosphinic acid                          | 312.00 | 92.81  | 87.01  | 5.80  |
| Tripropionine                                                 | 245.00 | 62.84  | 68.64  | -5.80 |
| Benzylbromide                                                 | 117.00 | 39.32  | 33.53  | 5.79  |
| Trichlorotoluene                                              | 141.10 | 45.92  | 40.14  | 5.78  |
| Dibutyl tartrate                                              | 249.20 | 64.01  | 69.79  | -5.78 |
| 2-Phenyl-1,3-butadiene                                        | 136.90 | 44.76  | 38.99  | 5.77  |
| 2,5,8,11-Tetraoxododecane                                     | 183.40 | 45.97  | 51.74  | -5.77 |
| 2-Chloropropionyl fluoride                                    | 83.10  | 18.46  | 24.23  | -5.77 |
| Pentyl methoxy dithiophosphinic acid                          | 178.40 | 56.13  | 50.37  | 5.76  |
| Ethyl propyl fluorophosphate                                  | 145.70 | 35.64  | 41.40  | -5.76 |
| Isobutyl isopropoxy S-methoxycarbonyl ethyl dithiophosphinate | 269.60 | 81.14  | 75.38  | 5.76  |
| (Ethylthio)benzene                                            | 135.00 | 44.22  | 38.46  | 5.76  |
| Butyl methoxy dithiophosphinic acid                           | 161.70 | 51.54  | 45.79  | 5.75  |
| Ethyl butylxanthate                                           | 169.40 | 53.65  | 47.90  | 5.75  |
| 2-(1-Methylvinyl)aniline                                      | 137.40 | 44.87  | 39.12  | 5.75  |
| Butyl dichloro phosphorus thioxide                            | 145.90 | 47.20  | 41.45  | 5.75  |
| Bromo-2-chlorobenzene                                         | 115.80 | 38.93  | 33.20  | 5.73  |
| Trimethoxyborine                                              | 106.30 | 24.86  | 30.59  | -5.73 |
| 1,1,2-Tribromoethane                                          | 99.70  | 34.51  | 28.78  | 5.73  |
| 1,2-Dihydronaphthalene                                        | 132.60 | 43.53  | 37.81  | 5.72  |
| 1,2-Dichloro-3,3,4,4,5,5-hexafluorocyclopentene               | 137.00 | 33.29  | 39.01  | -5.72 |
| 4-Methyl-2,6-dicrotylphenol                                   | 227.60 | 69.58  | 63.86  | 5.72  |
| N-Butyl-N-methylmorpholinium N-acetylleucinate                | 338.00 | 88.43  | 94.14  | -5.71 |
| Trimethyl phosphate                                           | 116.80 | 27.76  | 33.47  | -5.71 |
| Thiohempa                                                     | 176.90 | 55.66  | 49.96  | 5.70  |
| Chlorazine                                                    | 239.80 | 72.91  | 67.21  | 5.70  |
| Triethyl borate                                               | 156.60 | 38.69  | 44.39  | -5.70 |
| (2-Methyl-1-propenyl)benzene                                  | 141.70 | 46.00  | 40.30  | 5.70  |
| 1-Bromo-2,4-dimethylbenzene                                   | 134.20 | 43.94  | 38.24  | 5.70  |
| Pentyl ethoxy dithiophosphinic acid                           | 195.10 | 60.64  | 54.95  | 5.69  |
| Diethyleneglycol diacetate                                    | 178.90 | 44.82  | 50.51  | -5.69 |
| Phenylamino(diethylamino)borane                               | 188.60 | 58.85  | 53.17  | 5.68  |
| N-Propyl-N-methylmorpholinium N-acetylleucinate               | 321.30 | 83.88  | 89.56  | -5.68 |
| Triethyl citrate                                              | 251.50 | 64.74  | 70.42  | -5.68 |
| 3-Bromochlorobenzene                                          | 116.00 | 38.93  | 33.25  | 5.68  |
| 1,1,3,5,7,9-Hexaethoxydecane                                  | 426.60 | 112.77 | 118.45 | -5.68 |
| Methyldichloro-4-chlorophenoxysilane                          | 174.90 | 55.08  | 49.41  | 5.67  |

|                                                   |        |        |        |       |
|---------------------------------------------------|--------|--------|--------|-------|
| Dibutoxy 2-hydroxyethoxy borine                   | 232.30 | 59.48  | 65.15  | -5.67 |
| Diethyl malate                                    | 175.60 | 43.93  | 49.60  | -5.67 |
| 1-Benzylpyrrole                                   | 157.60 | 50.33  | 44.66  | 5.67  |
| Monomethyl glutarate                              | 135.00 | 32.82  | 38.46  | -5.64 |
| 1,2,3-Tribromopropane                             | 116.20 | 38.94  | 33.31  | 5.63  |
| N-Octyl-N-methylmorpholinium N-acetylalaninate    | 353.70 | 92.82  | 98.45  | -5.63 |
| 1-Bromo-4-chlorobenzene                           | 116.00 | 38.88  | 33.25  | 5.63  |
| 1,2,3-Trichloro-1,1,2,3,3-pentafluoropropane      | 127.60 | 30.81  | 36.43  | -5.62 |
| 1-Phenylcyclohexene                               | 165.20 | 52.37  | 46.75  | 5.62  |
| N-Ethyl-N-methylmorpholinium N-acetylisoleucinate | 301.90 | 78.62  | 84.24  | -5.62 |
| Thioanisole                                       | 118.10 | 39.45  | 33.83  | 5.62  |
| Diphenyl phosphonate                              | 199.20 | 61.69  | 56.07  | 5.62  |
| Allyl iodide                                      | 80.50  | 29.13  | 23.52  | 5.61  |
| 1-Phenylpiperazine                                | 161.60 | 51.37  | 45.76  | 5.61  |
| 1,4-Bis(diethoxyboryl)butane                      | 281.80 | 73.12  | 78.73  | -5.61 |
| (trans-1-Butenyl)benzene                          | 142.50 | 46.13  | 40.52  | 5.61  |
| Chloro-2,3-dinitrobenzene                         | 139.70 | 45.36  | 39.75  | 5.61  |
| 1,5-Pentanediol diacetate                         | 186.00 | 46.85  | 52.45  | -5.60 |
| Butyl isopropoxy dithiophosphinic acid            | 194.10 | 60.27  | 54.67  | 5.60  |
| Pentyl dichloro phosphorus thioxide               | 162.60 | 51.63  | 46.03  | 5.60  |
| 1-Butyl-1-methylpyrrolidinium methylsulfate       | 237.30 | 60.93  | 66.52  | -5.59 |
| Thiophos                                          | 235.90 | 71.73  | 66.14  | 5.59  |
| beta-Elementene                                   | 222.10 | 67.94  | 62.35  | 5.59  |
| Tetramethoxysilane                                | 137.30 | 33.51  | 39.09  | -5.58 |
| 2-Bromo-1-phenyl-1-propanone                      | 153.20 | 49.04  | 43.46  | 5.58  |
| Tripropyl borate                                  | 206.70 | 52.55  | 58.13  | -5.58 |
| 1,2,3,4,5,6,7,8-Octahydroanthracene               | 193.10 | 59.98  | 54.40  | 5.58  |
| Dimethyl 3-oxo-2-butyl phosphate                  | 167.60 | 41.83  | 47.41  | -5.58 |
| Tribromomethane                                   | 83.20  | 29.82  | 24.26  | 5.56  |
| (2-Bromoethyl)benzene                             | 134.10 | 43.78  | 38.22  | 5.56  |
| Phenylsilane                                      | 111.00 | 37.44  | 31.88  | 5.56  |
| Dimethyl glutarate                                | 152.10 | 37.60  | 43.15  | -5.55 |
| Butyl ethoxy dithiophosphinic acid                | 178.40 | 55.92  | 50.37  | 5.55  |
| 3-Chloro-1,1,1-trifluoropropane                   | 90.40  | 20.68  | 26.23  | -5.55 |
| O-Hexyl S-propenylxanthate                        | 214.00 | 65.68  | 60.13  | 5.55  |
| Tetra(diethylamino)silane                         | 329.40 | 97.33  | 91.78  | 5.55  |
| Diacetoxymethane                                  | 118.30 | 28.35  | 33.88  | -5.53 |
| Carbitol acetate                                  | 176.40 | 44.29  | 49.82  | -5.53 |
| Triethyl phosphate                                | 167.20 | 41.77  | 47.30  | -5.53 |
| Ethyl fluorophosphoric acid                       | 94.90  | 21.94  | 27.47  | -5.53 |
| L-Proline 1-methylethyl ester dodecyl sulfate     | 417.10 | 110.32 | 115.84 | -5.52 |
| Dimethyl malonate                                 | 118.90 | 28.53  | 34.05  | -5.52 |
| Ethanediol diacetate                              | 135.90 | 33.20  | 38.71  | -5.51 |
| Isopentyl ethoxyethoxy dithiophosphinic acid      | 235.80 | 71.62  | 66.11  | 5.51  |
| Phenylboron dichloride                            | 126.50 | 41.64  | 36.13  | 5.51  |
| 2-Chlorostyrene                                   | 124.30 | 41.03  | 35.53  | 5.50  |
| Tricaprilin                                       | 496.50 | 132.13 | 137.62 | -5.49 |

|                                                      |        |        |        |       |
|------------------------------------------------------|--------|--------|--------|-------|
| 2-Bromoaniline                                       | 112.80 | 37.86  | 32.37  | 5.49  |
| Dimethyl hexanedioate                                | 169.00 | 42.31  | 47.79  | -5.48 |
| 2-hydroxyethylammonium butanoate                     | 155.20 | 38.53  | 44.00  | -5.47 |
| 1-Ethylpyridinium bis(fluorosulfonyl) amide          | 215.90 | 55.18  | 60.65  | -5.47 |
| 2-Bromo-1,3,5-trimethylbenzene                       | 150.40 | 48.16  | 42.69  | 5.47  |
| 1,3-Propanediol diacetate                            | 152.60 | 37.82  | 43.29  | -5.47 |
| Isophthaloylchloride                                 | 149.80 | 47.99  | 42.52  | 5.47  |
| Cyclohexyltrifluorosilane                            | 139.60 | 34.26  | 39.73  | -5.47 |
| 1,1-Ethanediol diacetate                             | 135.00 | 33.00  | 38.46  | -5.46 |
| alpha-Ethylstyrene                                   | 142.40 | 45.95  | 40.49  | 5.46  |
| N-Phenylpiperidine                                   | 166.00 | 52.42  | 46.97  | 5.45  |
| Butyl fluorophosphoric acid                          | 128.30 | 31.18  | 36.63  | -5.45 |
| Hexyl methoxy dithiophosphinic acid                  | 195.10 | 60.39  | 54.95  | 5.44  |
| N-Propyl-N-methylmorpholinium N-acetylvalinate       | 302.70 | 79.02  | 84.46  | -5.44 |
| 4-Isopropylstyrene                                   | 159.20 | 50.54  | 45.10  | 5.44  |
| Bis(diethylamino fluoro thiophosphorus) oxide        | 254.80 | 76.76  | 71.32  | 5.44  |
| Bis(butylthio) hexyl borane                          | 297.90 | 88.58  | 83.14  | 5.44  |
| Methylnonylphenylsilane                              | 277.20 | 82.90  | 77.47  | 5.43  |
| Bis(2-methoxyethyl)phosphite                         | 176.70 | 44.47  | 49.90  | -5.43 |
| 3-Ethylstyrene                                       | 142.60 | 45.98  | 40.55  | 5.43  |
| 2-(2-Methoxyethoxy)ethanol                           | 123.10 | 29.77  | 35.20  | -5.43 |
| Dimethyl succinate                                   | 134.90 | 33.01  | 38.44  | -5.43 |
| 4-Ethylstyrene                                       | 142.60 | 45.97  | 40.55  | 5.42  |
| 2-Ethylstyrene                                       | 142.20 | 45.86  | 40.44  | 5.42  |
| 2-Thiocresol                                         | 117.70 | 39.14  | 33.72  | 5.42  |
| p-Isopropenylisopropylbenzene                        | 175.10 | 54.86  | 49.46  | 5.40  |
| 2-Bromothiophene                                     | 93.70  | 32.53  | 27.14  | 5.39  |
| Dimethyl methylmalonate                              | 135.40 | 33.18  | 38.57  | -5.39 |
| 1-Bromo-2,5-dimethylbenzene                          | 133.70 | 43.50  | 38.11  | 5.39  |
| Benzylmethylsulfide                                  | 134.20 | 43.63  | 38.24  | 5.39  |
| Diethyl 3-oxo-2-butyl phosphate                      | 201.10 | 51.21  | 56.59  | -5.38 |
| 2-Hydroxyethylammonium pentanoate                    | 171.60 | 43.12  | 48.50  | -5.38 |
| Ethyl hydrogen succinate                             | 135.10 | 33.11  | 38.49  | -5.38 |
| Chloromethylphenylsilane                             | 140.90 | 45.46  | 40.08  | 5.38  |
| Triethylisothiocyanatosilane                         | 171.50 | 53.85  | 48.48  | 5.37  |
| Dimethyl 2-methylsuccinate                           | 151.70 | 37.67  | 43.04  | -5.37 |
| 1-Phenyl-4-hexyl-3-decene                            | 341.00 | 100.34 | 94.97  | 5.37  |
| 4-Bromoanisole                                       | 127.50 | 41.78  | 36.41  | 5.37  |
| Diethyl adipate                                      | 202.30 | 51.56  | 56.92  | -5.36 |
| Ethyl diethoxyacetate                                | 175.90 | 44.32  | 49.68  | -5.36 |
| Isopentyl methoxyethoxy dithiophosphinic acid        | 219.00 | 66.86  | 61.50  | 5.36  |
| N-Octyl-N-methylmorpholinium N-acetylvalinate        | 386.60 | 102.12 | 107.47 | -5.35 |
| S-Butyl-dimethylthioformamidium difluorooxalylborate | 245.50 | 63.42  | 68.77  | -5.35 |
| 1,4-Butanediol diacetate                             | 169.30 | 42.52  | 47.87  | -5.35 |
| Pentanedioic acid                                    | 117.60 | 28.34  | 33.69  | -5.35 |

|                                                        |        |        |        |       |
|--------------------------------------------------------|--------|--------|--------|-------|
| Tripropyl phosphate                                    | 217.20 | 55.66  | 61.01  | -5.35 |
| Ethylene glycol diformate                              | 103.40 | 24.45  | 29.80  | -5.35 |
| Phenyltri(cyclohexyloxy)silane                         | 397.10 | 115.70 | 110.35 | 5.35  |
| Diethylphosphate                                       | 132.30 | 32.38  | 37.72  | -5.34 |
| O-Methyl S-propenylxanthate                            | 130.20 | 42.49  | 37.15  | 5.34  |
| Orthoformic acid trimethyl ester                       | 106.70 | 25.36  | 30.70  | -5.34 |
| Bis(trimethylsilylamino)dimethylsilane                 | 237.10 | 71.81  | 66.47  | 5.34  |
| 4-Methylpentyl octyloxy dithiophosphinic acid          | 311.60 | 92.24  | 86.90  | 5.34  |
| Dimethyl suberate                                      | 202.20 | 51.56  | 56.90  | -5.34 |
| Diethyl glutarate                                      | 185.60 | 47.01  | 52.34  | -5.33 |
| 1,7-Dibromo-3,3-dichloroheptane                        | 192.50 | 59.56  | 54.24  | 5.32  |
| 2-Methyl-4,6-dicrotylphenol                            | 227.70 | 69.21  | 63.89  | 5.32  |
| Acetoxyacetic acid ethylester                          | 135.80 | 33.37  | 38.68  | -5.31 |
| 2-(Phenylmethoxy)phenol                                | 189.10 | 58.61  | 53.30  | 5.31  |
| Monomethyl adipate                                     | 151.60 | 37.71  | 43.02  | -5.31 |
| 2-Bromo-4-methylaniline                                | 129.10 | 42.15  | 36.85  | 5.30  |
| 1,6-Hexanedioic acid                                   | 134.30 | 32.97  | 38.27  | -5.30 |
| Cyclohexyl iodide                                      | 125.10 | 41.05  | 35.75  | 5.30  |
| Diethylpropylthiophosphine                             | 169.10 | 53.11  | 47.82  | 5.29  |
| trans-1,2-Bis(trimethylsilyl)-3,3-dichlorocyclopropane | 234.40 | 71.02  | 65.73  | 5.29  |
| N-Butylpyridinium trifluoroacetate                     | 214.10 | 54.87  | 60.16  | -5.29 |
| Methyl dimethylmalonate                                | 151.60 | 37.73  | 43.02  | -5.29 |
| 3-Thiocresol                                           | 118.20 | 39.14  | 33.86  | 5.28  |
| Dicosamethyldecasiloxane                               | 695.60 | 197.51 | 192.23 | 5.28  |
| 4-Chlorothiophenol                                     | 116.10 | 38.56  | 33.28  | 5.28  |
| Diethyl malonate                                       | 152.30 | 37.93  | 43.21  | -5.28 |
| Diethylbutylthiophosphine                              | 202.50 | 62.25  | 56.98  | 5.27  |
| 1-Bromo-3-ethylbenzene                                 | 134.00 | 43.46  | 38.19  | 5.27  |
| 1,3-Difluoropropane                                    | 71.40  | 15.75  | 21.02  | -5.27 |
| Pentaethylbenzene                                      | 242.20 | 73.13  | 67.87  | 5.26  |
| 2-Chloro-1,1,1-trifluoroethane                         | 73.70  | 16.39  | 21.65  | -5.26 |
| 1-Bromo-4-ethylbenzene                                 | 133.90 | 43.42  | 38.16  | 5.26  |
| Methyl pyruvate                                        | 92.90  | 21.66  | 26.92  | -5.26 |
| Heptanedioic acid                                      | 151.00 | 37.60  | 42.85  | -5.25 |
| Dimethyl azelate                                       | 218.70 | 56.17  | 61.42  | -5.25 |
| Bis(2-ethoxyethyl)phosphite                            | 210.30 | 53.87  | 59.12  | -5.25 |
| 2,6-Dichloroaniline                                    | 122.60 | 40.31  | 35.06  | 5.25  |
| 1,1,1-Trimethoxyethane                                 | 122.90 | 29.90  | 35.15  | -5.25 |
| alpha-Chlorostyrene                                    | 124.40 | 40.80  | 35.56  | 5.24  |
| Hexachloropropylene                                    | 139.10 | 44.83  | 39.59  | 5.24  |
| Trifluoromethoxy-1,2-dibromo-1,2,2-trifluoroethane     | 135.90 | 33.47  | 38.71  | -5.24 |
| Diethyl oxalate                                        | 136.30 | 33.58  | 38.82  | -5.24 |
| Methyloctylphenylsilane                                | 260.70 | 78.18  | 72.94  | 5.24  |
| Dimethyl carbonate                                     | 83.50  | 19.10  | 24.34  | -5.24 |
| 1,2,3,4-Tetrahydroquinoline                            | 133.90 | 43.40  | 38.16  | 5.24  |
| Phenylchloroacetylene                                  | 120.60 | 39.75  | 34.51  | 5.24  |
| Diethyl methylsuccinate                                | 185.10 | 46.97  | 52.21  | -5.24 |

|                                               |        |        |        |       |
|-----------------------------------------------|--------|--------|--------|-------|
| Diethyl succinate                             | 168.40 | 42.39  | 47.63  | -5.24 |
| N,N-Dipropylaniline                           | 194.00 | 59.88  | 54.65  | 5.23  |
| 1,4-Difluorobutane                            | 88.10  | 20.37  | 25.60  | -5.23 |
| 2,2-Difluoropropane                           | 71.40  | 15.79  | 21.02  | -5.23 |
| 1,1,1-Triethoxypropane                        | 189.80 | 48.27  | 53.49  | -5.22 |
| 1,3-Dibromo-1,1-dichloropropane               | 126.00 | 41.22  | 36.00  | 5.22  |
| 1-Bromo-2-ethylbenzene                        | 133.70 | 43.33  | 38.11  | 5.22  |
| Tributyl borate                               | 256.80 | 66.65  | 71.87  | -5.22 |
| (3-Bromopropyl)benzene                        | 150.60 | 47.96  | 42.74  | 5.22  |
| Dimethylphosphate                             | 99.50  | 23.51  | 28.73  | -5.22 |
| Ethyl fluoroacetate                           | 95.00  | 22.28  | 27.49  | -5.21 |
| 3-Phenylpropylthiol                           | 150.70 | 47.98  | 42.77  | 5.21  |
| Tribromoborane                                | 80.70  | 28.78  | 23.57  | 5.21  |
| Ethyl methyl carbonate                        | 100.20 | 23.71  | 28.92  | -5.21 |
| Trilaurin                                     | 697.60 | 187.57 | 192.78 | -5.21 |
| 1-Methyl-1H-indene                            | 134.40 | 43.50  | 38.30  | 5.20  |
| 1-Iodoheptafluoropropane                      | 119.60 | 29.04  | 34.24  | -5.20 |
| 2-Methyl-1H-indene                            | 134.60 | 43.55  | 38.35  | 5.20  |
| Tripentoxyborine                              | 306.90 | 80.42  | 85.61  | -5.19 |
| 2-Hydroxyethylammonium formate                | 104.30 | 24.85  | 30.04  | -5.19 |
| Dimethyl sebacate                             | 235.60 | 60.88  | 66.06  | -5.18 |
| Dipropyl succinate                            | 201.80 | 51.61  | 56.79  | -5.18 |
| 1-Phenylpyrrolidine                           | 151.70 | 48.22  | 43.04  | 5.18  |
| Methanesulfenylchloride                       | 103.00 | 34.86  | 29.69  | 5.17  |
| N-Butyl-N-methylmorpholinium N-acetylvalinate | 319.80 | 83.98  | 89.15  | -5.17 |
| Indene                                        | 116.80 | 38.64  | 33.47  | 5.17  |
| 3-Methoxy-1,2-propanediol                     | 105.50 | 25.21  | 30.37  | -5.16 |
| 1,1,1-Trihexoxypropane                        | 390.20 | 103.30 | 108.46 | -5.16 |
| 3-Chlorostyrene                               | 124.60 | 40.77  | 35.61  | 5.16  |
| Diisobutyl adipate                            | 268.60 | 69.95  | 75.11  | -5.16 |
| 1-Methylbenzimidazole                         | 124.20 | 40.66  | 35.50  | 5.16  |
| Monobutyl succinate                           | 168.30 | 42.44  | 47.60  | -5.16 |
| Methoxy(methoxymethoxy)methane                | 106.90 | 25.60  | 30.76  | -5.16 |
| 2-Chloro-N,N-dimethylaniline                  | 141.20 | 45.32  | 40.16  | 5.16  |
| cis-1-Phenyl-1-propene                        | 125.20 | 40.93  | 35.78  | 5.15  |
| Hydroabietyl acrylate                         | 349.40 | 102.42 | 97.27  | 5.15  |
| Diethyl methylmalonate                        | 168.30 | 42.45  | 47.60  | -5.15 |
| 1,4-Dibromo-2-butyne                          | 105.10 | 35.41  | 30.26  | 5.15  |
| 2-Hydroxyethylammonium hexanoate              | 187.80 | 47.80  | 52.95  | -5.15 |
| Dipropyl adipate                              | 235.70 | 60.94  | 66.08  | -5.14 |
| 1-Methyl-4-(1-methylvinyl)benzene             | 142.20 | 45.58  | 40.44  | 5.14  |
| 1,5-Difluoropentane                           | 104.80 | 25.04  | 30.18  | -5.14 |
| 2-Methylstyrene                               | 125.80 | 41.08  | 35.94  | 5.14  |
| trans-(1-Methyl-1-propenyl)benzene            | 142.20 | 45.57  | 40.44  | 5.13  |
| Dibutylphenylaminoborane                      | 240.50 | 72.53  | 67.40  | 5.13  |
| Tripropoxymethane                             | 207.20 | 53.14  | 58.27  | -5.13 |
| Diethyleneglycol                              | 105.80 | 25.33  | 30.45  | -5.12 |
| Bis(2-propoxyethyl)phosphite                  | 243.70 | 63.16  | 68.28  | -5.12 |

|                                             |        |        |        |       |
|---------------------------------------------|--------|--------|--------|-------|
| 5-Bromo-3-bromomethyl-2-methyloetane        | 211.20 | 64.48  | 59.36  | 5.12  |
| 1,2,3,4-Tetrachlorobutadiene                | 122.10 | 40.04  | 34.93  | 5.11  |
| 1-Chloro-3-iodopropane                      | 100.30 | 34.06  | 28.95  | 5.11  |
| 3-Methyl-1H-indene                          | 134.50 | 43.44  | 38.33  | 5.11  |
| Difluorodiphenylsilane                      | 190.10 | 58.69  | 53.58  | 5.11  |
| N,N-Dibutylaniline                          | 227.40 | 68.92  | 63.81  | 5.11  |
| 1,6-Difluorohexane                          | 121.50 | 29.65  | 34.76  | -5.11 |
| Isobutyl ethoxyethoxy dithiophosphinic acid | 220.10 | 66.91  | 61.81  | 5.10  |
| Dipropylphenylaminoborane                   | 207.00 | 63.31  | 58.21  | 5.10  |
| Ethyl propyl carbonate                      | 133.70 | 33.01  | 38.11  | -5.10 |
| Decanedioic acid                            | 201.10 | 51.50  | 56.59  | -5.09 |
| Dipropyl oxalate                            | 169.70 | 42.89  | 47.98  | -5.09 |
| 1,1,1-Tributoxypropane                      | 290.00 | 75.89  | 80.98  | -5.09 |
| 1,2,3-Propanetriol                          | 88.20  | 20.54  | 25.63  | -5.09 |
| Xibornol                                    | 264.10 | 78.96  | 73.87  | 5.09  |
| Phthaloyl chloride                          | 148.20 | 47.17  | 42.08  | 5.09  |
| Dipropyl carbonate                          | 150.50 | 37.63  | 42.72  | -5.09 |
| Benzenethiol                                | 101.90 | 34.47  | 29.39  | 5.08  |
| 1-Vinyl-3-nitrobenzene                      | 133.70 | 43.19  | 38.11  | 5.08  |
| 1-Methoxy-2-propanol                        | 96.70  | 22.88  | 27.96  | -5.08 |
| 4-Bromotoluene                              | 118.10 | 38.90  | 33.83  | 5.07  |
| Ethyl bis(ethylthio) phosphorus oxide       | 178.70 | 55.52  | 50.45  | 5.07  |
| Monoethyl adipate                           | 168.30 | 42.53  | 47.60  | -5.07 |
| 1-Bromo-3,4-dimethylbenzene                 | 133.80 | 43.20  | 38.13  | 5.07  |
| Vitamin E                                   | 467.40 | 134.70 | 129.64 | 5.06  |
| Triisopentoxyborine                         | 305.40 | 80.14  | 85.20  | -5.06 |
| Benzoyl bromide                             | 120.70 | 39.60  | 34.54  | 5.06  |
| 4-Chlorophenoxytriethylsilane               | 230.30 | 69.66  | 64.60  | 5.06  |
| Octanedioic acid                            | 167.20 | 42.24  | 47.30  | -5.06 |
| 7-Phenyl-6-tridecene                        | 291.20 | 86.36  | 81.31  | 5.05  |
| Dichloromethylphenylsilane                  | 154.30 | 48.81  | 43.76  | 5.05  |
| Butyl di(3-aminopropyl)phosphine thioxide   | 240.20 | 72.37  | 67.32  | 5.05  |
| 1,1-Dibromo-1-octene                        | 176.00 | 54.76  | 49.71  | 5.05  |
| Diethyleneglycol monobutyl ether            | 173.30 | 43.92  | 48.97  | -5.05 |
| Bis(diallylamino)borane                     | 223.70 | 67.84  | 62.79  | 5.05  |
| Dibutyl malonate                            | 218.90 | 56.43  | 61.48  | -5.05 |
| Ethylene glycol monostearate                | 366.30 | 96.86  | 101.91 | -5.05 |
| Methyl abietate                             | 318.50 | 93.84  | 88.80  | 5.04  |
| Undecanedioic acid                          | 217.80 | 56.13  | 61.17  | -5.04 |
| Diethyl azelate                             | 252.10 | 65.54  | 70.58  | -5.04 |
| Butanedioic acid                            | 100.90 | 24.07  | 29.11  | -5.04 |
| Isopropylphosphonyl difluoride              | 99.00  | 23.55  | 28.59  | -5.04 |
| Triisopropyl borate                         | 204.60 | 52.52  | 57.55  | -5.03 |
| Monopropyl adipate                          | 185.00 | 47.15  | 52.18  | -5.03 |
| Methyl methoxyacetate                       | 99.90  | 23.81  | 28.84  | -5.03 |
| Pentafluoroanisole                          | 132.60 | 32.78  | 37.81  | -5.03 |
| 1-Chloro-1-phenyl-2-propene                 | 140.40 | 44.97  | 39.95  | 5.02  |
| 2,6-Di-t-butyl-p-cresol                     | 234.50 | 70.78  | 65.76  | 5.02  |
| Diethylcarbonate                            | 117.10 | 28.53  | 33.55  | -5.02 |

|                                                                    |        |        |        |       |
|--------------------------------------------------------------------|--------|--------|--------|-------|
| Carbon disulfide                                                   | 54.80  | 21.49  | 16.47  | 5.02  |
| 2-Bromotoluene                                                     | 117.40 | 38.66  | 33.64  | 5.02  |
| Dibromodiethylsilane                                               | 140.70 | 45.05  | 40.03  | 5.02  |
| Bis(trichlorosilyl)methane                                         | 162.70 | 51.08  | 46.06  | 5.02  |
| Butyl ethyl carbonate                                              | 150.40 | 37.67  | 42.69  | -5.02 |
| Diethyl decanedioate                                               | 269.20 | 70.26  | 75.27  | -5.01 |
| 2-Iodofuran                                                        | 90.50  | 31.27  | 26.26  | 5.01  |
| Bis(2-butoxyethyl)phosphite                                        | 277.10 | 72.43  | 77.44  | -5.01 |
| Butyl butylxanthate                                                | 202.80 | 62.07  | 57.06  | 5.01  |
| Dibutyl carbonate                                                  | 183.80 | 46.84  | 51.85  | -5.01 |
| 1,1,3,5-Tetraethoxy-5-methylhexane                                 | 297.40 | 78.00  | 83.01  | -5.01 |
| Trichlorophenoxysilane                                             | 157.60 | 49.67  | 44.66  | 5.01  |
| Propylphosphonyl difluoride                                        | 99.10  | 23.62  | 28.62  | -5.00 |
| Butyl propyl carbonate                                             | 167.20 | 42.30  | 47.30  | -5.00 |
| Butyl ethoxyethoxy dithiophosphinic acid                           | 221.40 | 67.15  | 62.16  | 4.99  |
| 1,3,4,5,6,6-Hexachloro-1-hexene                                    | 188.70 | 58.18  | 53.19  | 4.99  |
| Dodecanedioic acid                                                 | 234.50 | 60.77  | 65.76  | -4.99 |
| 1,3,5-Triisopropylbenzene                                          | 227.90 | 68.93  | 63.94  | 4.99  |
| 1,1,1-Trioctyloxypropane                                           | 490.40 | 130.96 | 135.94 | -4.98 |
| 2-Hydroxyethylammonium acetate                                     | 119.80 | 29.31  | 34.29  | -4.98 |
| 1,2-Propanediol diacetate                                          | 151.70 | 38.06  | 43.04  | -4.98 |
| 3-Bromo-1,1,2-trichloro-1-propene                                  | 116.10 | 38.26  | 33.28  | 4.98  |
| Tetrapropoxysilane                                                 | 270.50 | 70.65  | 75.63  | -4.98 |
| Dibutyl suberate                                                   | 302.50 | 79.43  | 84.41  | -4.98 |
| 1,1,3,5,7-Pentaethoxyoctane                                        | 352.80 | 93.23  | 98.20  | -4.97 |
| 2-Phenyl-3-methyl-2-butene                                         | 157.30 | 49.55  | 44.58  | 4.97  |
| 1-Butyl-3-ethylimidazolium triflate                                | 242.60 | 63.01  | 67.98  | -4.97 |
| 1-Benzyl-3-methylimidazolium<br>bis(trifluoromethylsulfonyl) amide | 325.90 | 85.86  | 90.82  | -4.96 |
| Di-t-amyl disulfide                                                | 213.10 | 64.85  | 59.89  | 4.96  |
| Tetrabutoxysilane                                                  | 336.90 | 88.88  | 93.84  | -4.96 |
| Ethyl glycolate                                                    | 99.30  | 23.71  | 28.67  | -4.96 |
| Benzyl mercaptan                                                   | 118.10 | 38.79  | 33.83  | 4.96  |
| Isopropyl lactate                                                  | 132.00 | 32.68  | 37.64  | -4.96 |
| TEPP                                                               | 237.90 | 61.73  | 66.69  | -4.96 |
| Dibutyl succinate                                                  | 235.20 | 60.99  | 65.95  | -4.96 |
| Diethyl ethylmalonate                                              | 184.20 | 47.01  | 51.96  | -4.95 |
| Methyldichloro-2-phenoxyethylsilane                                | 196.90 | 60.39  | 55.44  | 4.95  |
| 1,13-Tridecanedioic acid                                           | 251.20 | 65.39  | 70.34  | -4.95 |
| L-Valine 1-methylethyl ester dodecyl sulfate                       | 423.50 | 112.65 | 117.60 | -4.95 |
| Methyl fluorosulfonate                                             | 73.30  | 16.60  | 21.54  | -4.94 |
| Acetyliodide                                                       | 72.10  | 26.15  | 21.21  | 4.94  |
| Dibutyl oxalate                                                    | 203.10 | 52.21  | 57.14  | -4.93 |
| 2-Iodo-2-methylbutane                                              | 118.50 | 38.87  | 33.94  | 4.93  |
| Ethyl pentyl carbonate                                             | 167.10 | 42.34  | 47.27  | -4.93 |
| 1-Ethylpyridinium triflate                                         | 195.20 | 50.05  | 54.98  | -4.93 |
| Diethyl isobutylmalonate                                           | 217.80 | 56.25  | 61.17  | -4.92 |
| 2-Methoxyethyl acetate                                             | 116.40 | 28.44  | 33.36  | -4.92 |
| Diethyl chloromalonate                                             | 165.80 | 41.99  | 46.91  | -4.92 |



|                                            |        |        |        |       |
|--------------------------------------------|--------|--------|--------|-------|
| 2-Chloro-4-methylaniline                   | 125.00 | 40.64  | 35.72  | 4.92  |
| Nonanedioic acid                           | 184.40 | 47.10  | 52.01  | -4.91 |
| Dimethyl sulfate                           | 94.00  | 22.31  | 27.22  | -4.91 |
| 1,2,4-Trichlorobenzene                     | 126.00 | 40.90  | 36.00  | 4.90  |
| 1-Iodohexadecane                           | 303.20 | 89.50  | 84.60  | 4.90  |
| 1-Phenylimidazole                          | 135.20 | 43.42  | 38.52  | 4.90  |
| Ethyl orthoformate                         | 157.10 | 39.63  | 44.53  | -4.90 |
| Dibutyl decanedioate                       | 336.00 | 88.70  | 93.60  | -4.90 |
| 1-Fluoro-2-(trichloromethyl)benzene        | 145.80 | 46.32  | 41.43  | 4.89  |
| Diethyl 2-aminomalonate                    | 164.20 | 41.58  | 46.47  | -4.89 |
| (4-Methylphenyl)trimethylsilane            | 176.80 | 54.82  | 49.93  | 4.89  |
| 1,14-Tetradecanedioic acid                 | 267.90 | 70.03  | 74.92  | -4.89 |
| Bis(ethylthio) isobutylborane              | 196.80 | 60.30  | 55.41  | 4.89  |
| Tridecyl borate                            | 557.30 | 149.41 | 154.29 | -4.88 |
| 3-Bromotoluene                             | 118.10 | 38.71  | 33.83  | 4.88  |
| 4-Bromoacetophenone                        | 137.10 | 43.92  | 39.04  | 4.88  |
| Iodocyclopentane                           | 109.10 | 36.24  | 31.36  | 4.88  |
| Ethyl hexyl carbonate                      | 183.80 | 46.97  | 51.85  | -4.88 |
| Monobutyl adipate                          | 201.70 | 51.88  | 56.76  | -4.88 |
| Ethylphosphonyl difluoride                 | 82.40  | 19.16  | 24.04  | -4.88 |
| 1-Chloro-4-iodobutane                      | 117.00 | 38.40  | 33.53  | 4.87  |
| Dibutyl adipate                            | 269.20 | 70.40  | 75.27  | -4.87 |
| 2-Hydroxy-2-dimethylphosphonato-3-butanone | 168.50 | 42.78  | 47.65  | -4.87 |
| Methylphosphonic acid dimethyl ester       | 108.40 | 26.30  | 31.17  | -4.87 |
| 1,2-Dichlorotetramethyldisilane            | 160.30 | 50.27  | 45.40  | 4.87  |
| 2,6-Dichloroanisole                        | 134.60 | 43.22  | 38.35  | 4.87  |
| Vinyltriacetoxysilane                      | 196.80 | 50.55  | 55.41  | -4.86 |
| beta-Farnesene                             | 234.60 | 70.64  | 65.78  | 4.86  |
| Heptanoic anhydride                        | 259.10 | 67.65  | 72.50  | -4.85 |
| Dipropylene glycol monomethyl ether        | 156.10 | 39.40  | 44.25  | -4.85 |
| Diethyl isopropylmalonate                  | 199.30 | 51.25  | 56.10  | -4.85 |
| 2,3-Dichlorotoluene                        | 127.50 | 41.25  | 36.41  | 4.84  |
| Demanyl phosphate                          | 143.60 | 35.98  | 40.82  | -4.84 |
| N,N-Dimethyl-3-toluidine                   | 143.80 | 45.72  | 40.88  | 4.84  |
| t-Amyl t-butyl disulfide                   | 197.00 | 60.31  | 55.47  | 4.84  |
| N,N-Diethylaniline                         | 160.80 | 50.38  | 45.54  | 4.84  |
| cis-(1-Methyl-1-propenyl)benzene           | 141.70 | 45.14  | 40.30  | 4.84  |
| N-Ethylbenzaldehydeimine                   | 139.20 | 44.45  | 39.62  | 4.83  |
| 1-Bromo-4-(hexyloxy)benzene                | 211.10 | 64.17  | 59.34  | 4.83  |
| Ethylphenylchlorosilane                    | 157.40 | 49.44  | 44.61  | 4.83  |
| Dipentyl carbonate                         | 217.20 | 56.18  | 61.01  | -4.83 |
| 1-(Chloromethyl)-4-methylbenzene           | 129.70 | 41.84  | 37.01  | 4.83  |
| Di-t-butyl disulfide                       | 180.90 | 55.88  | 51.05  | 4.83  |
| Methoxyacetic acid                         | 82.50  | 19.24  | 24.06  | -4.82 |
| 1-Propynylbenzene                          | 123.20 | 40.05  | 35.23  | 4.82  |
| Methyl 3-methoxypropanoate                 | 116.00 | 28.43  | 33.25  | -4.82 |
| Propyl propylxanthate                      | 169.40 | 52.71  | 47.90  | 4.81  |
| 1-Phenyl-2-buten-1-one                     | 146.00 | 46.29  | 41.48  | 4.81  |

|                                               |        |        |        |       |
|-----------------------------------------------|--------|--------|--------|-------|
| Methyl lactate                                | 99.10  | 23.81  | 28.62  | -4.81 |
| Methylphosphonyl difluoride                   | 65.70  | 14.65  | 19.46  | -4.81 |
| cis-2-Methoxy-4-(1-propenyl)phenol            | 159.20 | 49.90  | 45.10  | 4.80  |
| Butylphosphonyl difluoride                    | 115.80 | 28.40  | 33.20  | -4.80 |
| Trimethylisothiocyanatosilane                 | 123.60 | 40.13  | 35.34  | 4.79  |
| Diethyl propylmalonate                        | 200.80 | 51.72  | 56.51  | -4.79 |
| Ethyl tribromoacetate                         | 144.90 | 45.97  | 41.18  | 4.79  |
| Eicosamethylnonasiloxane                      | 631.00 | 179.30 | 174.51 | 4.79  |
| O-Ethyl bis(N,N-diethylamino) thiophosphate   | 240.10 | 72.08  | 67.29  | 4.79  |
| Hexadecanedioic acid                          | 301.30 | 79.29  | 84.08  | -4.79 |
| N-Allylaniline                                | 139.30 | 44.43  | 39.64  | 4.79  |
| Bis(ethylthio) octyl borane                   | 264.50 | 78.77  | 73.98  | 4.79  |
| 1,2,3,4-Tetrahydro-1,1,6-trimethylnaphthalene | 186.90 | 57.48  | 52.70  | 4.78  |
| Diisobutyl carbonate                          | 183.40 | 46.96  | 51.74  | -4.78 |
| 3-Bromoanisole                                | 127.60 | 41.21  | 36.43  | 4.78  |
| Bis(dimethylamino)bis(diethylamino)silane     | 267.20 | 79.50  | 74.72  | 4.78  |
| Propandioic acid                              | 81.70  | 19.07  | 23.84  | -4.77 |
| alpha-Vetivone                                | 225.10 | 67.95  | 63.18  | 4.77  |
| Diethyldifluorosilane                         | 113.30 | 27.74  | 32.51  | -4.77 |
| Bis(2-pentoxyethyl)phosphite                  | 310.50 | 81.83  | 86.60  | -4.77 |
| 2-Bromothiazole                               | 88.70  | 30.53  | 25.76  | 4.77  |
| Carbonylsulfide                               | 44.50  | 8.88   | 13.64  | -4.76 |
| Ethylidoacetylene                             | 93.00  | 31.70  | 26.94  | 4.76  |
| 2,4-Dichlorotoluene                           | 127.60 | 41.19  | 36.43  | 4.76  |
| Styrene                                       | 110.40 | 36.47  | 31.72  | 4.75  |
| 4-Methoxybenzenethiol                         | 142.90 | 45.38  | 40.63  | 4.75  |
| Carbitol                                      | 139.90 | 35.06  | 39.81  | -4.75 |
| Bis(isopropylthio)borane                      | 163.70 | 51.08  | 46.34  | 4.74  |
| 1-Bromo-3,5-dimethylbenzene                   | 134.40 | 43.04  | 38.30  | 4.74  |
| Ethoxyacetic acid                             | 99.10  | 23.88  | 28.62  | -4.74 |
| Tri(2-pentoxy)borine                          | 304.10 | 80.11  | 84.85  | -4.74 |
| 3,7,11-Trimethyl-2,6,10-dodecatrienal         | 241.90 | 72.52  | 67.78  | 4.74  |
| 3-Methylstyrene                               | 126.70 | 40.92  | 36.19  | 4.73  |
| 3-Bromonitrobenzene                           | 125.00 | 40.45  | 35.72  | 4.73  |
| cis-3-Phenyl-2-propen-1-ol                    | 133.90 | 42.89  | 38.16  | 4.73  |
| Butyl ethylxanthate                           | 169.60 | 52.68  | 47.95  | 4.73  |
| Diethylene glycol dimethyl ether              | 140.40 | 35.22  | 39.95  | -4.73 |
| 1-(Chloromethyl)-2-methylbenzene              | 129.10 | 41.57  | 36.85  | 4.72  |
| Chlorodimethylphenylsilane                    | 157.40 | 49.33  | 44.61  | 4.72  |
| 2-(3-Methyl-6-methoxyphenyl)-3-hexene         | 217.10 | 65.70  | 60.98  | 4.72  |
| 1,2-Diisopropylbenzene                        | 176.20 | 54.48  | 49.76  | 4.72  |
| Tetra-2-methyl-1-propoxysilane                | 336.00 | 88.88  | 93.60  | -4.72 |
| Ethyl ethoxyacetate                           | 133.40 | 33.31  | 38.03  | -4.72 |
| Butanoic anhydride                            | 158.80 | 40.28  | 44.99  | -4.71 |
| 1,1-Dibromo-1-heptene                         | 159.30 | 49.84  | 45.13  | 4.71  |
| Ethyl lactate                                 | 115.80 | 28.49  | 33.20  | -4.71 |
| 2-Ethoxyethylacetate                          | 133.30 | 33.29  | 38.00  | -4.71 |

|                                                         |        |        |        |       |
|---------------------------------------------------------|--------|--------|--------|-------|
| 2',5'-Dichloroacetophenone                              | 146.20 | 46.24  | 41.54  | 4.70  |
| 2,6-Diisopropylaniline                                  | 191.10 | 58.55  | 53.85  | 4.70  |
| Ethyl alpha-methyl-alpha-dithiocarbomethoxyacetoacetate | 205.20 | 62.41  | 57.72  | 4.69  |
| Heptyliodoacetylene                                     | 176.40 | 54.51  | 49.82  | 4.69  |
| 1-Ethyl-3-methylimidazolium dimethylphosphate           | 213.00 | 55.17  | 59.86  | -4.69 |
| 1-Iodooctadecane                                        | 336.70 | 98.47  | 93.79  | 4.68  |
| 1,1,1-Triethoxyethane                                   | 173.20 | 44.26  | 48.94  | -4.68 |
| Pentafluorobenzene                                      | 107.90 | 26.35  | 31.03  | -4.68 |
| Monoamyl adipate                                        | 218.40 | 56.66  | 61.34  | -4.68 |
| 2,3,4,5,6-Pentafluorotoluene                            | 124.00 | 30.77  | 35.45  | -4.68 |
| Tetrapentoxysilane                                      | 403.30 | 107.38 | 112.05 | -4.67 |
| 1-Chloro-2,4-dinitrobenzene                             | 143.10 | 45.36  | 40.69  | 4.67  |
| Diethyleneglycol diethyl ether                          | 174.00 | 44.49  | 49.16  | -4.67 |
| Ethyl 3-ethoxypropionate                                | 149.90 | 37.88  | 42.55  | -4.67 |
| 2,2-Bis(methylthio)-hexane                              | 180.60 | 55.64  | 50.97  | 4.67  |
| N-Butylpyridinium triflate                              | 227.80 | 59.25  | 63.92  | -4.67 |
| 3-Bromothiophene                                        | 93.70  | 31.80  | 27.14  | 4.66  |
| Trimethoxymethylsilane                                  | 129.30 | 32.24  | 36.90  | -4.66 |
| Isofluorophate                                          | 160.20 | 40.72  | 45.38  | -4.66 |
| Ethyl pyruvate                                          | 109.70 | 26.87  | 31.52  | -4.65 |
| Fluorotribromomethane                                   | 87.40  | 30.06  | 25.41  | 4.65  |
| Bis(2-hexoxyethyl)phosphite                             | 343.90 | 91.11  | 95.76  | -4.65 |
| 1,1-Dichloropropylsulfenyl chloride                     | 121.60 | 39.44  | 34.79  | 4.65  |
| Bis(2-ethylhexyl) azelate                               | 450.20 | 120.27 | 124.92 | -4.65 |
| 2-Hydroxy-2-dibutylphosphonato-3-butanone               | 268.80 | 70.52  | 75.16  | -4.64 |
| Peroxyacetic acid                                       | 66.20  | 14.95  | 19.59  | -4.64 |
| Tribromonitromethane                                    | 106.20 | 35.20  | 30.56  | 4.64  |
| N-Butyl-difluoroacetamide                               | 135.80 | 34.05  | 38.68  | -4.63 |
| Isoamyl lactate                                         | 165.40 | 42.17  | 46.80  | -4.63 |
| Dimethyl 1,3-acetonedicarboxylate                       | 153.80 | 38.99  | 43.62  | -4.63 |
| 1,1-Bromoiodo-2,2,2-chlorodifluoroethane                | 111.40 | 36.62  | 31.99  | 4.63  |
| 1,1,2,3,3-Pentachloro-1-propene                         | 126.10 | 40.65  | 36.02  | 4.63  |
| Methyldichlorophenoxysilane                             | 160.70 | 50.14  | 45.51  | 4.63  |
| 1-Bromo-4-ethoxybenzene                                 | 144.30 | 45.64  | 41.01  | 4.63  |
| 1,2,4-Trimethyl-5-hexadecylbenzene                      | 397.10 | 114.97 | 110.35 | 4.62  |
| Iodoethylene                                            | 64.20  | 23.66  | 19.04  | 4.62  |
| 1-Acetoxy-3-oxa-5-oxooctane                             | 184.00 | 47.29  | 51.90  | -4.61 |
| 2-Bromoanisole                                          | 127.50 | 41.02  | 36.41  | 4.61  |
| Butyl cyanoacetate                                      | 141.70 | 35.69  | 40.30  | -4.61 |
| Trichloromethoxybenzene                                 | 149.90 | 47.16  | 42.55  | 4.61  |
| Bis(ethylthio) propylborane                             | 180.90 | 55.66  | 51.05  | 4.61  |
| Diethyl 1,1-cyclobutanedicarboxylate                    | 193.00 | 49.77  | 54.37  | -4.60 |
| 2-Butoxy-2-bora-1,3-dioxacyclopentane                   | 146.90 | 37.13  | 41.73  | -4.60 |
| Diethyleneglycol-di-n-butylether                        | 240.80 | 62.89  | 67.48  | -4.59 |
| Bromobenzene                                            | 101.80 | 33.95  | 29.36  | 4.59  |
| Butane-1,2,4-triol                                      | 102.80 | 25.04  | 29.63  | -4.59 |
| 1,5-Dibromoundecane                                     | 231.30 | 69.46  | 64.88  | 4.58  |

|                                           |        |        |        |       |
|-------------------------------------------|--------|--------|--------|-------|
| Ethyl 3-hydroxybutyrate                   | 130.90 | 32.76  | 37.34  | -4.58 |
| 2-Fluoroethanol                           | 58.70  | 12.96  | 17.54  | -4.58 |
| 1,2,3-Trimethylindene                     | 167.90 | 52.06  | 47.49  | 4.57  |
| 4-Chloro-N-methylaniline                  | 125.80 | 40.51  | 35.94  | 4.57  |
| 2-Hydroxy-2-diethylphosphonato-3-butanone | 202.10 | 52.30  | 56.87  | -4.57 |
| 1,2-Ethanediol dinitrate                  | 107.90 | 26.47  | 31.03  | -4.56 |
| Tripentoxymethane                         | 307.40 | 81.19  | 85.75  | -4.56 |
| Propyl isobutanoate                       | 140.20 | 35.33  | 39.89  | -4.56 |
| 1,3-Dioxolan-2-one                        | 72.20  | 16.68  | 21.24  | -4.56 |
| 1,1-Bis(methylthio)-cyclohexane           | 169.70 | 52.54  | 47.98  | 4.56  |
| Diisopropyl oxalate                       | 168.40 | 43.07  | 47.63  | -4.56 |
| Diethyl chloro phosphorus thioxide        | 132.20 | 42.25  | 37.70  | 4.55  |
| 4-Methylbenzoyl chloride                  | 132.90 | 42.44  | 37.89  | 4.55  |
| Phenylcyclohexane                         | 170.50 | 52.75  | 48.20  | 4.55  |
| Glycerol 1,3-dinitrate                    | 133.30 | 33.45  | 38.00  | -4.55 |
| alpha,alpha-Dichloroacetophenone          | 146.60 | 46.19  | 41.65  | 4.54  |
| Diethyl sulfate                           | 127.30 | 31.81  | 36.35  | -4.54 |
| Trimethyleneglycol dinitrate              | 124.60 | 31.07  | 35.61  | -4.54 |
| Dimethyl ethylphosphonate                 | 125.10 | 31.21  | 35.75  | -4.54 |
| 2,5-Dichlorothiophene                     | 103.80 | 34.44  | 29.91  | 4.53  |
| Isobutyl propanoate                       | 140.10 | 35.33  | 39.86  | -4.53 |
| Bis(ethylthio) butylborane                | 197.70 | 60.19  | 55.66  | 4.53  |
| Ethyl heptanoate                          | 173.40 | 44.47  | 49.00  | -4.53 |
| 1-Butyltetrahydrothiophenium saccharinate | 291.70 | 85.97  | 81.44  | 4.53  |
| Carvacrylmethylketone                     | 182.00 | 55.88  | 51.36  | 4.52  |
| Diethyl ketomalonate                      | 155.20 | 39.48  | 44.00  | -4.52 |
| Bis(2-heptoxyethyl)phosphite              | 377.30 | 100.40 | 104.92 | -4.52 |
| Dihexyl carbonate                         | 250.70 | 65.68  | 70.20  | -4.52 |
| Ylangene                                  | 217.50 | 65.61  | 61.09  | 4.52  |
| 2-(3-Methyl-6-hydroxyphenyl)-3-hexene     | 199.60 | 60.70  | 56.18  | 4.52  |
| 2,3-Butyleneglycol                        | 96.00  | 23.25  | 27.77  | -4.52 |
| Diethyl xanthate                          | 136.00 | 43.25  | 38.74  | 4.51  |
| Dimethyl cyclobutane-1,1-dicarboxylate    | 159.60 | 40.70  | 45.21  | -4.51 |
| Trioctyl borate                           | 457.10 | 122.30 | 126.81 | -4.51 |
| Tributoxymethane                          | 257.30 | 67.50  | 72.01  | -4.51 |
| 1,2-Dinitroethane                         | 91.30  | 21.97  | 26.48  | -4.51 |
| 2-Iodoctane                               | 169.20 | 52.35  | 47.84  | 4.51  |
| alpha-Methylstyrene                       | 126.50 | 40.63  | 36.13  | 4.50  |
| Chloriodomethane                          | 67.00  | 24.31  | 19.81  | 4.50  |
| 1-Methyl-4-(1-pentenyl-2-oxy)benzene      | 182.10 | 55.88  | 51.38  | 4.50  |
| Trimethoxysilylamine                      | 124.00 | 30.95  | 35.45  | -4.50 |
| 2,2-Bis(isopropylthio)propane             | 196.40 | 59.80  | 55.31  | 4.49  |
| Triisopropoxymethane                      | 206.20 | 53.51  | 57.99  | -4.48 |
| Triisobutoxymethane                       | 256.80 | 67.39  | 71.87  | -4.48 |
| Bis(ethylthio) isopropylborane            | 180.20 | 55.34  | 50.86  | 4.48  |
| o-Toluenesulfonyl chloride                | 145.50 | 45.82  | 41.34  | 4.48  |
| Glycolaldehyde                            | 56.40  | 12.43  | 16.91  | -4.48 |
| Ethoheptazine                             | 258.00 | 76.67  | 72.20  | 4.47  |
| Benzalchloride                            | 127.00 | 40.73  | 36.27  | 4.46  |

|                                              |        |        |        |       |
|----------------------------------------------|--------|--------|--------|-------|
| 2-t-Butylaniline                             | 157.20 | 49.01  | 44.55  | 4.46  |
| 2-Iodopropane                                | 86.00  | 29.48  | 25.02  | 4.46  |
| Lauric acid                                  | 223.20 | 58.20  | 62.66  | -4.46 |
| cis-Benzaldehyde oxime                       | 112.80 | 36.83  | 32.37  | 4.46  |
| 1,4-Bis(formoxy)-2-butyne                    | 126.90 | 31.79  | 36.24  | -4.45 |
| Dimethoxymethane                             | 80.70  | 19.12  | 23.57  | -4.45 |
| Dibutyl azodicarboxylate                     | 222.00 | 57.88  | 62.33  | -4.45 |
| N-Ethylmorpholinium formate                  | 160.70 | 41.07  | 45.51  | -4.44 |
| Propionyl fluoride                           | 69.00  | 15.92  | 20.36  | -4.44 |
| 1,2-Diaminobenzene                           | 105.50 | 34.81  | 30.37  | 4.44  |
| Tributyl phosphate                           | 264.80 | 69.63  | 74.07  | -4.44 |
| Diethyl 2-acetylsuccinate                    | 201.10 | 52.16  | 56.59  | -4.43 |
| Dipropyldifluorosilane                       | 146.70 | 37.24  | 41.67  | -4.43 |
| (4-Methoxyphenyl)trimethylsilane             | 186.20 | 56.94  | 52.51  | 4.43  |
| Diethyl 2-butylmalonate                      | 217.40 | 56.64  | 61.06  | -4.42 |
| 1,3-Butanediol dinitrate                     | 140.50 | 35.55  | 39.97  | -4.42 |
| Phenyltrimethylsilane                        | 160.50 | 49.88  | 45.46  | 4.42  |
| 2-Iodo-2-methylpropane                       | 102.50 | 33.97  | 29.55  | 4.42  |
| 2-Iodobutane                                 | 102.40 | 33.94  | 29.52  | 4.42  |
| Methylphenylsilane                           | 127.50 | 40.82  | 36.41  | 4.41  |
| 2,3-Dimethyl-2-iodobutane                    | 134.40 | 42.71  | 38.30  | 4.41  |
| Ethyl cyanoacetate                           | 108.30 | 26.73  | 31.14  | -4.41 |
| Tris(2-methoxyethyl) phosphite               | 238.20 | 62.36  | 66.77  | -4.41 |
| Acetic anhydride                             | 92.40  | 22.37  | 26.78  | -4.41 |
| beta-Vetivone                                | 224.90 | 67.53  | 63.12  | 4.41  |
| Fosthietan                                   | 189.30 | 57.76  | 53.36  | 4.40  |
| Dimethoxane                                  | 165.10 | 42.32  | 46.72  | -4.40 |
| 3,3-Diacetoxy-1-propene                      | 146.20 | 37.14  | 41.54  | -4.40 |
| Propyleneglycol dinitrate                    | 123.70 | 30.97  | 35.36  | -4.39 |
| Ethyltrimethoxysilane                        | 145.70 | 37.01  | 41.40  | -4.39 |
| 3-Chlorobenzyl chloride                      | 127.30 | 40.74  | 36.35  | 4.39  |
| Tetrahydro-2,5-dimethoxyfuran                | 129.80 | 32.65  | 37.04  | -4.39 |
| 5-Phenyleicosane                             | 416.10 | 119.95 | 115.57 | 4.38  |
| 1,2-Benzopyran                               | 126.10 | 40.40  | 36.02  | 4.38  |
| Dipropyl ethylphosphonate                    | 192.10 | 49.75  | 54.13  | -4.38 |
| N-Methylbenzaldehydeimine                    | 122.50 | 39.41  | 35.04  | 4.37  |
| 1,3-Bis(dichloromethyl)tetramethyldisiloxane | 227.00 | 68.07  | 63.70  | 4.37  |
| 3-Bromo-1,1-dichloro-1-propene               | 102.50 | 33.92  | 29.55  | 4.37  |
| Butyl chlorofluorophosphate                  | 134.20 | 33.88  | 38.24  | -4.36 |
| Diphenyl 2-ethylhexyl phosphate              | 341.40 | 99.44  | 95.08  | 4.36  |
| 4-Methylstyrene                              | 126.70 | 40.55  | 36.19  | 4.36  |
| 1,1-Bis(methoxycarbonyl)cyclohexane          | 189.90 | 49.16  | 53.52  | -4.36 |
| Propanoic anhydride                          | 125.40 | 31.47  | 35.83  | -4.36 |
| cis-2,4,6-Trimethyl-1,3,5-trioxane           | 129.40 | 32.57  | 36.93  | -4.36 |
| Isopropyl isopropanethiolsulfinate           | 152.10 | 47.51  | 43.15  | 4.36  |
| Coprostane                                   | 410.10 | 118.27 | 113.92 | 4.35  |
| 3-Iodopentane                                | 118.80 | 38.37  | 34.02  | 4.35  |
| 1-Iodo-2,2-dimethylpropane                   | 118.40 | 38.26  | 33.91  | 4.35  |

|                                                                               |        |        |        |       |
|-------------------------------------------------------------------------------|--------|--------|--------|-------|
| 5,6,7,8-Tetrahydro-1-naphthalenamine                                          | 149.40 | 46.76  | 42.41  | 4.35  |
| Morpholinium formate                                                          | 128.00 | 32.20  | 36.54  | -4.34 |
| Hexamethyldisilane                                                            | 166.40 | 51.42  | 47.08  | 4.34  |
| 2,3-Dibromo-1-propene                                                         | 91.60  | 30.90  | 26.56  | 4.34  |
| Ethylammonium nitrate                                                         | 98.60  | 24.14  | 28.48  | -4.34 |
| Di-n-propylsulfate                                                            | 160.50 | 41.12  | 45.46  | -4.34 |
| 1-Butylpyridinium bis(fluorosulfonyl) amide                                   | 246.10 | 64.60  | 68.94  | -4.34 |
| 1-Ethyl-3-methylpyridinium bis(fluorosulfonyl) amide                          | 229.90 | 60.16  | 64.49  | -4.33 |
| 1-Methoxy-2-crotyl-4-methylbenzene                                            | 184.60 | 56.40  | 52.07  | 4.33  |
| Tropacocaine                                                                  | 234.70 | 70.14  | 65.81  | 4.33  |
| (Diethylamino fluoro oxophosphorus) (diethylamino ethoxy oxophosphorus) oxide | 273.60 | 72.15  | 76.48  | -4.33 |
| 2-Acetoxy-4-oxa-6-oxononane                                                   | 200.00 | 51.98  | 56.29  | -4.31 |
| Propylenecarbonate                                                            | 88.50  | 21.40  | 25.71  | -4.31 |
| Ethyl 4-methylcaproate                                                        | 172.90 | 44.55  | 48.86  | -4.31 |
| Dibutyl ethylphosphonate                                                      | 225.50 | 58.98  | 63.29  | -4.31 |
| 2-Fluorohexane                                                                | 116.60 | 37.72  | 33.42  | 4.30  |
| Methylcyanoacetate                                                            | 91.50  | 22.23  | 26.53  | -4.30 |
| 2,2-Bis(butylthio)butane                                                      | 247.40 | 73.59  | 69.29  | 4.30  |
| Diethyl ethylphosphonate                                                      | 158.70 | 40.67  | 44.96  | -4.29 |
| N,N-Dimethylaniline                                                           | 128.20 | 40.89  | 36.60  | 4.29  |
| Triisopropyl phosphate                                                        | 213.80 | 55.79  | 60.08  | -4.29 |
| 1,4-Pentanediol                                                               | 112.70 | 28.06  | 32.35  | -4.29 |
| 1,2,3,4-Tetrafluorobenzene                                                    | 103.00 | 25.40  | 29.69  | -4.29 |
| Butyl dibutoxyborine                                                          | 246.90 | 64.87  | 69.16  | -4.29 |
| 1-Iodododecane                                                                | 236.50 | 70.59  | 66.30  | 4.29  |
| 2-Chlorobenzyl chloride                                                       | 127.10 | 40.58  | 36.30  | 4.28  |
| 5-Hydroxy-3-methyl-1-phenylpyrazole                                           | 160.10 | 49.63  | 45.35  | 4.28  |
| 2-Methyl-1,2-propanediol                                                      | 95.90  | 23.46  | 27.74  | -4.28 |
| Diethyleneglycol diaminopropyl ether                                          | 230.90 | 60.49  | 64.77  | -4.28 |
| 1,4-Diaminobenzene                                                            | 106.10 | 34.81  | 30.54  | 4.27  |
| 2,2-Diethoxyhexane                                                            | 196.50 | 51.06  | 55.33  | -4.27 |
| 1-Ethyl-3-methylimidazolium methylsulfate                                     | 187.60 | 48.62  | 52.89  | -4.27 |
| 2,5-Dibromooctane                                                             | 179.90 | 55.05  | 50.78  | 4.27  |
| Monoheptyl adipate                                                            | 235.10 | 61.65  | 65.92  | -4.27 |
| Diethylamino difluorophosphate                                                | 123.90 | 31.15  | 35.42  | -4.27 |
| Diethyleneglycol bischloroformate                                             | 174.50 | 45.03  | 49.30  | -4.27 |
| 4-Chlorobenzaldehyde                                                          | 116.80 | 37.74  | 33.47  | 4.27  |
| 2,3-Dihydro-1H-indole                                                         | 116.80 | 37.74  | 33.47  | 4.27  |
| 1-Hexylpyridinium bis(fluorosulfonyl) amide                                   | 279.90 | 73.94  | 78.21  | -4.27 |
| 1,7-Heptanediol                                                               | 146.20 | 37.27  | 41.54  | -4.27 |
| L-Alanine 1-methylethyl ester dodecyl sulfate                                 | 385.40 | 102.88 | 107.14 | -4.26 |
| 1,1-Cyclohexanedithiol                                                        | 136.80 | 43.22  | 38.96  | 4.26  |
| 1-Hexyl-1,2,3,4-tetrahydronaphthalene                                         | 237.50 | 70.84  | 66.58  | 4.26  |
| Phenoxytripropylsilane                                                        | 265.10 | 78.41  | 74.15  | 4.26  |
| Methyl pivalate                                                               | 123.10 | 30.94  | 35.20  | -4.26 |
| N,N-Dibutyl-difluoroacetamide                                                 | 201.30 | 52.39  | 56.65  | -4.26 |
| 1,3,5-Triethylbenzene                                                         | 179.80 | 55.01  | 50.75  | 4.26  |

|                                        |        |        |        |       |
|----------------------------------------|--------|--------|--------|-------|
| 3-Oxa-5-oxo-1-octanol                  | 148.10 | 37.80  | 42.06  | -4.26 |
| 2,2-Diethoxyethanamine                 | 142.30 | 36.21  | 40.47  | -4.26 |
| 4-Oxa-6-oxo-2-nonanol                  | 164.50 | 42.30  | 46.56  | -4.26 |
| Triethanolamine                        | 149.00 | 38.05  | 42.30  | -4.25 |
| Methyl levulinate                      | 125.30 | 31.55  | 35.80  | -4.25 |
| 1-Chloro-4-tert-butylbenzene           | 162.50 | 50.26  | 46.01  | 4.25  |
| Dimethylacetal                         | 97.00  | 23.79  | 28.04  | -4.25 |
| O,S-Dimethyldithiocarbonate            | 102.90 | 33.91  | 29.66  | 4.25  |
| Glyceryl-1-nitrate                     | 108.70 | 27.00  | 31.25  | -4.25 |
| Tetra-3-methyl-1-butoxysilane          | 401.20 | 107.23 | 111.48 | -4.25 |
| trans-1,2-Dibromocyclohexane           | 136.20 | 43.04  | 38.79  | 4.25  |
| 1-Chloro-2,2-difluoropropane           | 85.50  | 20.64  | 24.89  | -4.25 |
| Tris(2-ethoxyethyl) phosphite          | 288.60 | 76.35  | 80.59  | -4.24 |
| Acetoxyacetone                         | 108.60 | 26.98  | 31.22  | -4.24 |
| Ethyl 3-oxopentanoate                  | 142.50 | 36.28  | 40.52  | -4.24 |
| 2,3-Pentanediol                        | 112.60 | 28.08  | 32.32  | -4.24 |
| Propyliodoacetylene                    | 109.70 | 35.76  | 31.52  | 4.24  |
| 2-Chloroaniline                        | 109.70 | 35.76  | 31.52  | 4.24  |
| Butyliodoacetylene                     | 126.40 | 40.34  | 36.11  | 4.23  |
| trans-3-Phenyl-2-propen-1-ol           | 135.70 | 42.89  | 38.66  | 4.23  |
| 2,2-Dimethoxybutane                    | 129.60 | 32.75  | 36.98  | -4.23 |
| Diethyl dibutylmalonate                | 283.70 | 75.02  | 79.25  | -4.23 |
| Diisopropyl adipate                    | 234.40 | 61.50  | 65.73  | -4.23 |
| 1-Chloro-3-(1-methylethoxy)-2-propanol | 143.80 | 36.65  | 40.88  | -4.23 |
| Diethyl azodicarboxylate               | 155.10 | 39.75  | 43.98  | -4.23 |
| 4-Bromo-1,2-dimethoxybenzene           | 153.30 | 47.71  | 43.48  | 4.23  |
| 3-Methoxy-1-butanol                    | 113.10 | 28.24  | 32.46  | -4.22 |
| N-Methyl-o-toluidine                   | 127.60 | 40.65  | 36.43  | 4.22  |
| 1-Hydroxy-2-butanone                   | 89.10  | 21.66  | 25.87  | -4.21 |
| 3-Ethoxypropanenitrile                 | 105.90 | 26.27  | 30.48  | -4.21 |
| Bis(2-cyanoethyl) ether                | 123.80 | 31.18  | 35.39  | -4.21 |
| 1,3-Bis(trifluoromethyl)benzene        | 144.80 | 36.94  | 41.15  | -4.21 |
| Ethynylbenzene                         | 106.40 | 34.83  | 30.62  | 4.21  |
| alpha-Chlorobenzeneacetyl chloride     | 146.40 | 45.80  | 41.59  | 4.21  |
| Pentadecanedioic acid                  | 282.30 | 74.66  | 78.87  | -4.21 |
| 1,2-Dibromo-1-ethoxyethane             | 124.10 | 39.68  | 35.47  | 4.21  |
| 1-Methoxy-2-methyl-4-crotylbenzene     | 184.60 | 56.27  | 52.07  | 4.20  |
| alpha-Curcumene                        | 225.40 | 67.46  | 63.26  | 4.20  |
| 2-Methoxy-1-propanol                   | 96.30  | 23.65  | 27.85  | -4.20 |
| 1,3-Propanediol                        | 79.40  | 19.02  | 23.21  | -4.19 |
| Butylammonium nitrate                  | 131.60 | 33.34  | 37.53  | -4.19 |
| 2,2-Bis(isopropylthio)butane           | 212.50 | 63.91  | 59.72  | 4.19  |
| 3,5-Bis(trifluoromethyl)aniline        | 156.20 | 40.09  | 44.28  | -4.19 |
| Dipropyl azodicarboxylate              | 188.50 | 48.95  | 53.14  | -4.19 |
| tri-n-Amylphosphate                    | 314.90 | 83.62  | 87.81  | -4.19 |
| 2,4,6-Trimethylaniline                 | 142.40 | 44.68  | 40.49  | 4.19  |
| 1,2-Ethanediol                         | 62.70  | 14.45  | 18.63  | -4.18 |
| 1,4-Dichlorobenzene                    | 111.90 | 36.31  | 32.13  | 4.18  |
| 1-Acetoxy-4-ethyl-3-oxa-5-oxooctane    | 215.60 | 56.39  | 60.57  | -4.18 |

|                                                              |        |       |       |       |
|--------------------------------------------------------------|--------|-------|-------|-------|
| Dimethylaminoacetaldehyde diethylacetal                      | 175.60 | 45.42 | 49.60 | -4.18 |
| Dipentyl ethylphosphonate                                    | 258.90 | 68.27 | 72.45 | -4.18 |
| 1,2-Butanediol                                               | 96.00  | 23.59 | 27.77 | -4.18 |
| 2,5-Dichlorotoluene                                          | 127.60 | 40.61 | 36.43 | 4.18  |
| Hexylphosphinic dichloride                                   | 161.40 | 49.88 | 45.71 | 4.17  |
| 1,5-Pentanediol                                              | 112.80 | 28.20 | 32.37 | -4.17 |
| 1,1-Dibromo-1-propene                                        | 92.50  | 30.98 | 26.81 | 4.17  |
| Methyl acetate                                               | 74.00  | 17.56 | 21.73 | -4.17 |
| 1,1-Dibromo-1-hexene                                         | 142.60 | 44.72 | 40.55 | 4.17  |
| Acetoacetic acid butylester                                  | 158.90 | 40.85 | 45.02 | -4.17 |
| Bromo butylthio isopentylborane                              | 212.90 | 64.00 | 59.83 | 4.17  |
| 1-Iodononane                                                 | 186.40 | 56.73 | 52.56 | 4.17  |
| Longifolene                                                  | 216.30 | 64.93 | 60.76 | 4.17  |
| Ethyl levulinate                                             | 142.30 | 36.30 | 40.47 | -4.17 |
| 1,3-Butyleneglycol                                           | 96.10  | 23.63 | 27.79 | -4.16 |
| Tetramethylene glycol                                        | 96.10  | 23.63 | 27.79 | -4.16 |
| Phosphorus trichloride                                       | 75.40  | 26.28 | 22.12 | 4.16  |
| Methyldiethylphenoxysilane                                   | 199.40 | 60.29 | 56.13 | 4.16  |
| 1-Benzosuberone                                              | 157.00 | 48.66 | 44.50 | 4.16  |
| 4-Oxopentanoic acid                                          | 108.30 | 26.98 | 31.14 | -4.16 |
| Chloro diisobutoxyborine                                     | 193.50 | 50.35 | 54.51 | -4.16 |
| N,N-Dimethyl-p-toluidine                                     | 143.90 | 45.06 | 40.91 | 4.15  |
| Tri(1,2,2-trimethylpropoxy)borine                            | 351.20 | 93.61 | 97.76 | -4.15 |
| Diethyl methylphosphonate                                    | 142.00 | 36.23 | 40.38 | -4.15 |
| 1,4-Dihydronaphthalene                                       | 133.70 | 42.26 | 38.11 | 4.15  |
| Glyme                                                        | 97.40  | 24.00 | 28.15 | -4.15 |
| Diisopropyl disulfide                                        | 148.00 | 46.18 | 42.03 | 4.15  |
| Methylacetoacetate                                           | 109.10 | 27.21 | 31.36 | -4.15 |
| Tris(dimethylamino)dibutylaminosilane                        | 302.60 | 88.58 | 84.43 | 4.15  |
| 1,2-Propanediol                                              | 79.40  | 19.07 | 23.21 | -4.14 |
| 1,2,4-Triethylbenzene                                        | 179.60 | 54.84 | 50.70 | 4.14  |
| 1,1-Bis(ethylthio)-2-butyne                                  | 172.20 | 52.81 | 48.67 | 4.14  |
| 2,2-Diethoxypentane                                          | 179.80 | 46.61 | 50.75 | -4.14 |
| trans-1,2-Dibromoethene                                      | 76.50  | 26.56 | 22.42 | 4.14  |
| Propanoic acid                                               | 73.30  | 17.40 | 21.54 | -4.14 |
| Diethyl cyclopropane-1,1-dicarboxylate                       | 177.60 | 46.01 | 50.15 | -4.14 |
| 1,2-Dibromo-4,4-dimethylpentane                              | 162.70 | 50.20 | 46.06 | 4.14  |
| 1,2-Pentanediol                                              | 112.70 | 28.21 | 32.35 | -4.14 |
| Tetravinylsilane                                             | 150.60 | 46.88 | 42.74 | 4.14  |
| Bis(trimethoxysilylamino)dimethylsilane                      | 292.80 | 77.61 | 81.75 | -4.14 |
| 2,3-Butanediol dinitrate                                     | 139.20 | 35.48 | 39.62 | -4.14 |
| S-Methyl-dimethylthioformamidium<br>trifluoromethylsulfonate | 186.00 | 48.32 | 52.45 | -4.13 |
| 1-Chloro-2,4-bis(trifluoromethyl)benzene                     | 158.80 | 40.86 | 44.99 | -4.13 |
| 1,1-Difluoro-2,2-bromiodoethylene                            | 92.40  | 30.91 | 26.78 | 4.13  |
| 2-Bromo-3-methylpyridine                                     | 113.00 | 36.56 | 32.43 | 4.13  |
| Dimethyldiacetoxysilane                                      | 158.60 | 40.81 | 44.94 | -4.13 |
| 4-t-Butylbenzaldehyde                                        | 167.20 | 51.42 | 47.30 | 4.12  |
| Tetrahydrofurfuryl acetate                                   | 138.90 | 35.41 | 39.53 | -4.12 |



|                                                        |        |       |        |       |
|--------------------------------------------------------|--------|-------|--------|-------|
| N-Cyclohexylaniline                                    | 183.50 | 55.89 | 51.77  | 4.12  |
| Isobutyric anhydride                                   | 158.40 | 40.76 | 44.88  | -4.12 |
| Methyl formate                                         | 57.30  | 13.03 | 17.15  | -4.12 |
| 2-Ethyl-6-methylaniline                                | 142.60 | 44.67 | 40.55  | 4.12  |
| Isobutyl valerate                                      | 173.60 | 44.93 | 49.05  | -4.12 |
| 2-Methyl-3-amino-4-methoxymethyl-5-aminomethylpyridine | 173.70 | 53.20 | 49.08  | 4.12  |
| Diethyl acetylphosphonate                              | 160.80 | 41.42 | 45.54  | -4.12 |
| n-Undecanoic acid                                      | 206.50 | 53.96 | 58.08  | -4.12 |
| N-Ethyl-2-methylaniline                                | 144.30 | 45.13 | 41.01  | 4.12  |
| Triethoxymethylsilane                                  | 179.30 | 46.50 | 50.61  | -4.11 |
| 2-Methyl-1,3-propanediol                               | 95.90  | 23.63 | 27.74  | -4.11 |
| Formaldehyde diethylacetal                             | 114.20 | 28.65 | 32.76  | -4.11 |
| Dimethylphenylsilane                                   | 144.00 | 45.04 | 40.93  | 4.11  |
| Trihexyl phosphate                                     | 365.50 | 97.58 | 101.69 | -4.11 |
| 1,2,3,4-Tetrahydro-1,5-dimethylnaphthalene             | 170.40 | 52.28 | 48.17  | 4.11  |
| 3,4-Dichlorotoluene                                    | 128.00 | 40.65 | 36.54  | 4.11  |
| Bicyclopophosphate                                     | 128.10 | 32.47 | 36.57  | -4.10 |
| 2,2-Diethoxybutane                                     | 163.10 | 42.07 | 46.17  | -4.10 |
| Methylphosphoric acid ethylester                       | 107.90 | 26.93 | 31.03  | -4.10 |
| Carbon dioxide                                         | 34.10  | 6.69  | 10.79  | -4.10 |
| 1-Ethyl-1-phenylhydrazine                              | 140.10 | 43.96 | 39.86  | 4.10  |
| Bis(butylthio)borane                                   | 199.20 | 60.17 | 56.07  | 4.10  |
| 4-Octylacetophenone                                    | 250.90 | 74.35 | 70.25  | 4.10  |
| N,N'-Diethylurea                                       | 121.40 | 30.64 | 34.73  | -4.09 |
| Phenoxytrimethylsilane                                 | 166.40 | 51.17 | 47.08  | 4.09  |
| Dihexyl disulfide                                      | 248.40 | 73.66 | 69.57  | 4.09  |
| 1-Iodoctane                                            | 169.70 | 52.07 | 47.98  | 4.09  |
| 1,1-Dimethylindane                                     | 154.40 | 47.87 | 43.79  | 4.08  |
| 1,1-Dibromo-1-pentene                                  | 125.90 | 40.05 | 35.97  | 4.08  |
| 4-Fluoro-1-trifluoromethoxybenzene                     | 128.10 | 32.49 | 36.57  | -4.08 |
| 2,2-Dimethoxypropane                                   | 113.00 | 28.35 | 32.43  | -4.08 |
| 1,2-Dibromo-4,4-dimethylhexane                         | 178.60 | 54.50 | 50.42  | 4.08  |
| Methyl cellosolve                                      | 80.10  | 19.33 | 23.41  | -4.08 |
| alpha,alpha-Dimethylacetoacetic acid ethylester        | 158.30 | 40.78 | 44.85  | -4.07 |
| 2-Propoxyethanol                                       | 113.60 | 28.52 | 32.59  | -4.07 |
| 2,6-Dichlorotoluene                                    | 127.50 | 40.48 | 36.41  | 4.07  |
| 3,6-Dibromononane                                      | 196.20 | 59.32 | 55.25  | 4.07  |
| Ethyl nitroacetate                                     | 113.40 | 28.47 | 32.54  | -4.07 |
| Tetraisopropoxysilane                                  | 267.80 | 70.82 | 74.89  | -4.07 |
| Cyanamide                                              | 41.20  | 8.67  | 12.74  | -4.07 |
| Propylisobutoxyphosphinic chloride                     | 172.70 | 44.74 | 48.80  | -4.06 |
| 1-Methoxy-5-heptanol                                   | 163.40 | 42.19 | 46.25  | -4.06 |
| Propylammonium nitrate                                 | 114.50 | 28.78 | 32.84  | -4.06 |
| Exalgin                                                | 144.90 | 45.24 | 41.18  | 4.06  |
| Tetraethoxysilane                                      | 204.00 | 53.33 | 57.39  | -4.06 |
| 2,5-Dihydro-2,5-dimethoxyfuran                         | 124.70 | 31.58 | 35.64  | -4.06 |
| Dimpylate                                              | 270.40 | 79.66 | 75.60  | 4.06  |

|                                              |        |       |       |       |
|----------------------------------------------|--------|-------|-------|-------|
| Bis(diethylamino fluoro oxophosphorus) oxide | 234.80 | 61.78 | 65.84 | -4.06 |
| Ethyl chlorofluoroacetate                    | 109.30 | 27.36 | 31.41 | -4.05 |
| Isoamyl iodide                               | 119.00 | 38.13 | 34.08 | 4.05  |
| 2-Bromo-1,1,1-trifluoroethane                | 77.90  | 18.75 | 22.80 | -4.05 |
| 1,3-Dimethylimidazolium methosulfate         | 172.80 | 44.78 | 48.83 | -4.05 |
| Ethyl 4-bromobenzoate                        | 163.90 | 50.44 | 46.39 | 4.05  |
| 1,1-Dipropoxyethane                          | 164.00 | 42.37 | 46.42 | -4.05 |
| 1-Butoxy-2-propanol                          | 146.90 | 37.68 | 41.73 | -4.05 |
| 1-Ethyl-3-methylimidazolium diethylphosphate | 244.90 | 64.56 | 68.61 | -4.05 |
| 1,1-Dimethoxyhexadecane                      | 330.70 | 88.10 | 92.14 | -4.04 |
| Propylpropoxyphosphinic chloride             | 156.50 | 40.32 | 44.36 | -4.04 |
| DBCP                                         | 111.80 | 36.14 | 32.10 | 4.04  |
| Chloropropham                                | 186.80 | 56.71 | 52.67 | 4.04  |
| 2,5-Hexanediol                               | 129.40 | 32.89 | 36.93 | -4.04 |
| 2,6-Di-t-butylpyridine                       | 209.70 | 62.99 | 58.95 | 4.04  |
| 3,5,5-Trimethyl-1,1-hexanedithiol            | 196.00 | 59.23 | 55.20 | 4.03  |
| Dipropoxymethane                             | 147.60 | 37.89 | 41.92 | -4.03 |
| 2-Methyl-2-pentanol                          | 120.00 | 30.32 | 34.35 | -4.03 |
| 1-Iodoheptane                                | 153.00 | 47.43 | 43.40 | 4.03  |
| Dihexyl ethylphosphonate                     | 292.30 | 77.58 | 81.61 | -4.03 |
| Tris(2-propoxyethyl) phosphite               | 338.60 | 90.28 | 94.31 | -4.03 |
| n-Propylformate                              | 90.90  | 22.34 | 26.37 | -4.03 |
| Diethyl itaconate                            | 179.60 | 46.67 | 50.70 | -4.03 |
| Ethyl acetate                                | 90.60  | 22.26 | 26.29 | -4.03 |
| 5-Bromo-3-bromomethyloctane                  | 195.50 | 59.08 | 55.06 | 4.02  |
| Diethanolamine                               | 108.30 | 27.12 | 31.14 | -4.02 |
| 2,2-Dimethoxy-N-methylethanamine             | 125.80 | 31.92 | 35.94 | -4.02 |
| 1-(Chloromethyl)-3-methylbenzene             | 130.00 | 41.11 | 37.09 | 4.02  |
| 1-Hexyl-3-methylimidazolium tetracyanoborate | 289.70 | 76.88 | 80.90 | -4.02 |
| Hexametapil                                  | 160.60 | 49.50 | 45.49 | 4.01  |
| 3,4-Dihydro-2-methyl-1(2H)-naphthalenone     | 157.10 | 48.54 | 44.53 | 4.01  |
| 1,4-Bis(butanoyloxy)-2-butyne                | 226.00 | 59.41 | 63.42 | -4.01 |
| Methyldiethyl-2-phenoxyethylsilane           | 235.60 | 70.07 | 66.06 | 4.01  |
| 1-Ethyl-2-isopropylbenzene                   | 161.60 | 49.77 | 45.76 | 4.01  |
| Dimethyl itaconate                           | 146.10 | 37.50 | 41.51 | -4.01 |
| Butyl 4-oxopentanoate                        | 175.70 | 45.62 | 49.63 | -4.01 |
| 1-Iododecane                                 | 203.10 | 61.15 | 57.14 | 4.01  |
| 2,3-Dibromo-2-methylbutane                   | 130.20 | 41.15 | 37.15 | 4.00  |
| Di-2-propenoyldiethyleneglycol               | 201.70 | 52.76 | 56.76 | -4.00 |
| n-Butylformate                               | 107.60 | 26.95 | 30.95 | -4.00 |
| Isobutyl iodide                              | 102.40 | 33.52 | 29.52 | 4.00  |
| alpha-Irone                                  | 217.50 | 65.09 | 61.09 | 4.00  |
| 2-Benzyltetrahydropyran                      | 176.20 | 53.76 | 49.76 | 4.00  |
| 2-Cyanopropan-2-ol                           | 88.30  | 21.66 | 25.65 | -3.99 |
| 1,3-Dichlorobenzene                          | 111.90 | 36.12 | 32.13 | 3.99  |
| 5-Phenyl-4-nonene                            | 225.00 | 67.14 | 63.15 | 3.99  |
| n-Octylacetate                               | 190.00 | 49.56 | 53.55 | -3.99 |

|                                                      |        |        |        |       |
|------------------------------------------------------|--------|--------|--------|-------|
| 2,3-Dihydro-1-methyl-1H-indene                       | 138.10 | 43.30  | 39.31  | 3.99  |
| N-Methyl-m-toluidine                                 | 127.20 | 40.31  | 36.32  | 3.99  |
| 1-Phenyl-2-butene                                    | 143.50 | 44.78  | 40.80  | 3.98  |
| N-Butylaniline                                       | 161.70 | 49.77  | 45.79  | 3.98  |
| Phenoxytriethylsilane                                | 215.30 | 64.47  | 60.49  | 3.98  |
| Methoxyacetaldehyde                                  | 73.70  | 17.67  | 21.65  | -3.98 |
| Dinitrogenmonoxide                                   | 32.10  | 6.26   | 10.24  | -3.98 |
| 1,1-Bis(ethoxycarbonyl)-2-methylcyclopentane         | 222.70 | 58.54  | 62.52  | -3.98 |
| 4-Isopropylbenzaldehyde                              | 151.40 | 46.94  | 42.96  | 3.98  |
| Butyric acid methylester                             | 107.00 | 26.81  | 30.78  | -3.97 |
| 1-Iodoheptane                                        | 136.30 | 42.79  | 38.82  | 3.97  |
| 2-Methyl-1,5-pentanediol                             | 129.00 | 32.85  | 36.82  | -3.97 |
| 4-s-Butylaniline                                     | 159.10 | 49.04  | 45.07  | 3.97  |
| N-Butyl-3-methylpyridinium trifluoromethanesulfonate | 243.50 | 64.26  | 68.22  | -3.96 |
| 2-Ethoxyethanol                                      | 96.90  | 24.05  | 28.01  | -3.96 |
| 3,7-Dimethyl-1,7-octanediol                          | 194.90 | 50.93  | 54.89  | -3.96 |
| 2-t-Butyltoluene                                     | 161.30 | 49.64  | 45.68  | 3.96  |
| 1,1-Dichloro-2,2-difluoroethane                      | 83.00  | 20.24  | 24.20  | -3.96 |
| Ethyl formate                                        | 74.10  | 17.80  | 21.76  | -3.96 |
| 1-Propoxy-2-propanol                                 | 130.10 | 33.16  | 37.12  | -3.96 |
| 2,5-Dioxaheptane                                     | 114.20 | 28.80  | 32.76  | -3.96 |
| 2-(1-Methyl-3-butenyl)-4-cresol                      | 183.60 | 55.75  | 51.79  | 3.96  |
| Nonyl acetate                                        | 207.30 | 54.34  | 58.29  | -3.95 |
| 2,5-Dibromoheptane                                   | 163.30 | 50.18  | 46.23  | 3.95  |
| Dimethyl dipropylmalonate                            | 213.60 | 56.07  | 60.02  | -3.95 |
| 1-Methoxy-2-propanone                                | 90.00  | 22.17  | 26.12  | -3.95 |
| Ethyl 5-oxohexanoate                                 | 159.10 | 41.13  | 45.07  | -3.94 |
| 5-Oxohexanoic acid                                   | 125.00 | 31.78  | 35.72  | -3.94 |
| 4-Ethylaniline                                       | 127.00 | 40.21  | 36.27  | 3.94  |
| cis-2,2,5,5-Tetramethyl-3-hexene                     | 156.90 | 48.41  | 44.47  | 3.94  |
| 1,1-Bis(isopropylthio)ethane                         | 181.00 | 55.02  | 51.08  | 3.94  |
| 1-Isopropoxy-2-propanol                              | 129.80 | 33.10  | 37.04  | -3.94 |
| Benzenesulfonylchloride                              | 130.00 | 41.03  | 37.09  | 3.94  |
| Acetic acid                                          | 56.70  | 13.05  | 16.99  | -3.94 |
| 1-Phenyl-4-hexyldecane                               | 347.30 | 100.63 | 96.69  | 3.94  |
| 2-Isopropoxyethanol                                  | 113.20 | 28.55  | 32.48  | -3.93 |
| Dimethyl maleate                                     | 128.80 | 32.83  | 36.76  | -3.93 |
| Glycerol tristearate                                 | 997.60 | 271.13 | 275.06 | -3.93 |
| Ethyl chlorohydroxyacetate                           | 113.30 | 28.58  | 32.51  | -3.93 |
| N-(Dimethoxymethyl)dimethylamine                     | 125.80 | 32.01  | 35.94  | -3.93 |
| 2-Bromo-4-methylphenol                               | 127.00 | 40.20  | 36.27  | 3.93  |
| 5-Methoxy-2-pentanol                                 | 130.10 | 33.19  | 37.12  | -3.93 |
| Pargyline                                            | 167.80 | 51.39  | 47.46  | 3.93  |
| 1,3-Dibromopropyne                                   | 88.40  | 29.61  | 25.68  | 3.93  |
| Methyl propyl disulfide                              | 116.00 | 37.18  | 33.25  | 3.93  |
| n-Hexylacetate                                       | 157.20 | 40.63  | 44.55  | -3.92 |
| 1,2,3,4-Tetrahydro-6-methylnaphthalene               | 154.70 | 47.79  | 43.87  | 3.92  |

|                                                          |        |        |        |       |
|----------------------------------------------------------|--------|--------|--------|-------|
| 2-(2-Methylpropoxy)ethanol                               | 130.10 | 33.20  | 37.12  | -3.92 |
| Fluoroethane                                             | 49.80  | 11.18  | 15.09  | -3.91 |
| Pentyl butyrate                                          | 173.90 | 45.22  | 49.13  | -3.91 |
| N-Propylaniline                                          | 145.00 | 45.12  | 41.21  | 3.91  |
| Dimethyl phosphite                                       | 90.70  | 22.40  | 26.31  | -3.91 |
| 2,2'-Bioxirane                                           | 82.60  | 20.18  | 24.09  | -3.91 |
| 1-Iodopentane                                            | 119.60 | 38.15  | 34.24  | 3.91  |
| 2,2-Dimethoxyethanamine                                  | 108.80 | 27.37  | 31.28  | -3.91 |
| 3-methyl-1,5-pentanediol                                 | 128.70 | 32.83  | 36.74  | -3.91 |
| 2-Vinyloxymethylthiophene                                | 129.10 | 40.75  | 36.85  | 3.90  |
| Butanoic acid                                            | 89.90  | 22.19  | 26.09  | -3.90 |
| Isobutyl ethoxyethoxy S-(2-cyanoethyl) dithiophosphinate | 272.10 | 79.97  | 76.07  | 3.90  |
| Enanthic acid                                            | 139.80 | 35.88  | 39.78  | -3.90 |
| Propyl octanoate                                         | 207.10 | 54.34  | 58.24  | -3.90 |
| 1,1-Bis(methylthio)propane                               | 131.60 | 41.43  | 37.53  | 3.90  |
| Fluoromethane                                            | 33.00  | 6.59   | 10.49  | -3.90 |
| Methyl propanoate                                        | 89.80  | 22.17  | 26.07  | -3.90 |
| Chlorodibromomethane                                     | 79.00  | 27.00  | 23.10  | 3.90  |
| 1-Chloro-4-isopropylbenzene                              | 146.20 | 45.43  | 41.54  | 3.89  |
| Diethyl ethylidenemalonate                               | 177.80 | 46.31  | 50.20  | -3.89 |
| cis,trans,trans-1,5,9-Cyclododecatriene                  | 178.40 | 54.26  | 50.37  | 3.89  |
| Methyl isobutanoate                                      | 106.70 | 26.81  | 30.70  | -3.89 |
| Triheptyl borate                                         | 407.00 | 109.18 | 113.07 | -3.89 |
| Methyl nonanoate                                         | 190.10 | 49.69  | 53.58  | -3.89 |
| 1-Ethyl-3-methylimidazolium tetracyanoborate             | 223.20 | 58.77  | 62.66  | -3.89 |
| N-Methylalanine ethylester                               | 135.00 | 34.58  | 38.46  | -3.88 |
| Ethyl tris(2,2-diethylhydrazino)silane                   | 334.00 | 96.93  | 93.05  | 3.88  |
| 1-Acetoxy-4-oxoheptane                                   | 174.70 | 45.47  | 49.35  | -3.88 |
| Tri(butyl) methylphosphonium methylsulfate               | 325.60 | 86.86  | 90.74  | -3.88 |
| Ethyl butanoate                                          | 123.80 | 31.51  | 35.39  | -3.88 |
| Propyl propanoate                                        | 123.80 | 31.51  | 35.39  | -3.88 |
| 1,2-Dis(trimethylsilyl)-ethylene                         | 193.90 | 58.50  | 54.62  | 3.88  |
| 3-Chloroaniline                                          | 109.80 | 35.43  | 31.55  | 3.88  |
| 1,1-Dibromo-1-butene                                     | 109.20 | 35.26  | 31.39  | 3.87  |
| 1,3-Diisopropylbenzene                                   | 179.90 | 54.65  | 50.78  | 3.87  |
| Ethyl methyl disulfide                                   | 99.30  | 32.54  | 28.67  | 3.87  |
| 1,4-Bis(valeroyloxy)-2-butyne                            | 259.30 | 68.69  | 72.56  | -3.87 |
| Triethoxypentylsilane                                    | 245.70 | 64.96  | 68.83  | -3.87 |
| 1,2-Dichlorobenzene                                      | 111.70 | 35.94  | 32.07  | 3.87  |
| 4-Chloro-1-phenyl-1-butanone                             | 166.10 | 50.86  | 46.99  | 3.87  |
| Cyclooctatetraene                                        | 109.70 | 35.39  | 31.52  | 3.87  |
| Hexachloroacetone                                        | 146.60 | 45.51  | 41.65  | 3.86  |
| Methyl t-butyl disulfide                                 | 131.80 | 41.45  | 37.59  | 3.86  |
| 2-Dimethylaminopyridine                                  | 123.90 | 39.28  | 35.42  | 3.86  |
| Diheptyl ethylphosphonate                                | 325.70 | 86.91  | 90.77  | -3.86 |
| 4-Methyl-2-(1-hexen-5-yl)phenol                          | 201.20 | 60.48  | 56.62  | 3.86  |
| Octadecylbenzene                                         | 382.80 | 110.29 | 106.43 | 3.86  |

|                                                        |        |        |        |       |
|--------------------------------------------------------|--------|--------|--------|-------|
| Bis(propylthio)borane                                  | 165.80 | 50.77  | 46.91  | 3.86  |
| Methyl hexanoate                                       | 140.30 | 36.06  | 39.92  | -3.86 |
| 9-Bromo-1,5,5-trichlorononane                          | 221.70 | 66.10  | 62.24  | 3.86  |
| 1-Fluoropropane                                        | 66.50  | 15.82  | 19.68  | -3.86 |
| Entprol                                                | 301.80 | 80.36  | 84.21  | -3.85 |
| 2-Phenyltetradecane                                    | 314.20 | 91.47  | 87.62  | 3.85  |
| 4-t-Butylaniline                                       | 159.40 | 49.01  | 45.16  | 3.85  |
| Benzylisopropylamine                                   | 160.90 | 49.42  | 45.57  | 3.85  |
| Tris(2,2-diethylhydrazino)silane                       | 302.40 | 88.23  | 84.38  | 3.85  |
| 1-Iodobutane                                           | 102.90 | 33.51  | 29.66  | 3.85  |
| 2,6-Dimethylchroman                                    | 163.50 | 50.13  | 46.28  | 3.85  |
| Ethyl ethylcarbamate                                   | 119.30 | 30.31  | 34.16  | -3.85 |
| 2,6-Xylidine                                           | 126.10 | 39.87  | 36.02  | 3.85  |
| n-Butyl acetate                                        | 123.60 | 31.49  | 35.34  | -3.85 |
| n-Propyl acetate                                       | 106.90 | 26.91  | 30.76  | -3.85 |
| 2-(Methacryloyloxy)ethyl acetoacetate                  | 198.00 | 51.90  | 55.74  | -3.84 |
| 1-Ethyl-2-phenylhydrazine                              | 140.70 | 43.87  | 40.03  | 3.84  |
| 1,1-Bis(butylthio)ethane                               | 215.30 | 64.33  | 60.49  | 3.84  |
| 2,2-Bis(isobutylthio)-1-propanol                       | 239.40 | 70.94  | 67.10  | 3.84  |
| 1,3-Dioxolane                                          | 70.20  | 16.85  | 20.69  | -3.84 |
| Tris(2-butoxyethyl) phosphite                          | 388.70 | 104.21 | 108.05 | -3.84 |
| 2-n-Hexoxyethanol                                      | 163.60 | 42.47  | 46.31  | -3.84 |
| N-Isobutyl-3-sulfopropan-1-aminium<br>hydrogen sulfate | 237.90 | 62.85  | 66.69  | -3.84 |
| Butylcellosolve                                        | 130.20 | 33.31  | 37.15  | -3.84 |
| Diethyl cellosolve                                     | 131.00 | 33.53  | 37.37  | -3.84 |
| Ethyl hexanoate                                        | 157.10 | 40.69  | 44.53  | -3.84 |
| N-Ethylaniline                                         | 128.30 | 40.46  | 36.63  | 3.83  |
| Triheptyl phosphate                                    | 415.40 | 111.54 | 115.37 | -3.83 |
| Acetylmesitylene                                       | 164.40 | 50.36  | 46.53  | 3.83  |
| (Dichloromethyl)trichlorosilane                        | 124.30 | 39.36  | 35.53  | 3.83  |
| Acetone dibutoxyketal                                  | 213.70 | 56.22  | 60.05  | -3.83 |
| Butyl hydroperoxide                                    | 97.10  | 24.24  | 28.07  | -3.83 |
| 1,1-Diethoxyethane                                     | 130.60 | 33.43  | 37.26  | -3.83 |
| Tri(isobutyl) methylphosphonium tosylate               | 382.30 | 110.12 | 106.29 | 3.83  |
| trans-Cinnamyl acetate                                 | 172.30 | 52.52  | 48.69  | 3.83  |
| Methoxyacetonitrile                                    | 72.40  | 17.47  | 21.29  | -3.82 |
| 1,4-Diisopropylbenzene                                 | 180.40 | 54.74  | 50.92  | 3.82  |
| 1-Ethyl-3-methylimidazolium threoninate                | 223.30 | 58.86  | 62.68  | -3.82 |
| Ethyl 2-(methoxyethyl)acetoacetate                     | 182.50 | 47.67  | 51.49  | -3.82 |
| Ethyl 2-aminoacetate                                   | 102.10 | 25.62  | 29.44  | -3.82 |
| Formic acid                                            | 39.90  | 8.56   | 12.38  | -3.82 |
| Ethyltributoxysilane                                   | 295.50 | 78.67  | 82.49  | -3.82 |
| 1-Methoxy-5-undecanol                                  | 230.20 | 60.76  | 64.58  | -3.82 |
| Phenoxytriisothiocyanatosilane                         | 225.20 | 67.02  | 63.20  | 3.82  |
| 2-Methylbenzo[b]furane                                 | 126.40 | 39.92  | 36.11  | 3.81  |
| Dihexylsulfate                                         | 260.20 | 68.99  | 72.80  | -3.81 |
| Pentanoic acid                                         | 106.60 | 26.86  | 30.67  | -3.81 |
| Propyl butyrate                                        | 140.50 | 36.16  | 39.97  | -3.81 |

|                                      |        |        |        |       |
|--------------------------------------|--------|--------|--------|-------|
| Ethyl N-methylcarbamate              | 102.40 | 25.71  | 29.52  | -3.81 |
| 1,1-Diethoxypentane                  | 180.60 | 47.16  | 50.97  | -3.81 |
| Tri-isopentoxymethane                | 305.10 | 81.31  | 85.12  | -3.81 |
| Methyl valerate                      | 123.50 | 31.50  | 35.31  | -3.81 |
| Ethoxyacetaldehyde                   | 90.50  | 22.45  | 26.26  | -3.81 |
| Methyl 2-methylacetoacetate          | 125.20 | 31.97  | 35.78  | -3.81 |
| Amyl propionate                      | 157.20 | 40.75  | 44.55  | -3.80 |
| Trihexoxymethane                     | 357.50 | 95.69  | 99.49  | -3.80 |
| 5-Hydroxy-2-pentanone                | 105.90 | 26.68  | 30.48  | -3.80 |
| 1-Fluorobutane                       | 83.20  | 20.46  | 24.26  | -3.80 |
| n-Heptylnitrite                      | 153.20 | 39.66  | 43.46  | -3.80 |
| 2-Nonanol                            | 170.70 | 44.46  | 48.26  | -3.80 |
| Bis(chlorofluorooxophosphorus) oxide | 113.20 | 28.69  | 32.48  | -3.79 |
| n-Propyl iodide                      | 86.20  | 28.87  | 25.08  | 3.79  |
| 4-Ethyl-3-oxa-1-heptanol             | 161.60 | 41.97  | 45.76  | -3.79 |
| Propylbutoxyphosphinic chloride      | 172.90 | 45.07  | 48.86  | -3.79 |
| n-Heptylacetate                      | 173.70 | 45.29  | 49.08  | -3.79 |
| 1-Acetoxy-2-ethyl-4-oxoheptane       | 207.20 | 54.48  | 58.27  | -3.79 |
| Cyclohexyl isothiocyanate            | 136.60 | 42.69  | 38.90  | 3.79  |
| 3-Methyl-2-oxobutanoic acid          | 108.10 | 27.30  | 31.09  | -3.79 |
| Bromo ethylthio isopentylborane      | 179.70 | 54.51  | 50.72  | 3.79  |
| Diethylamino ethyl fluorophosphate   | 161.40 | 41.92  | 45.71  | -3.79 |
| Methyloxiran                         | 63.80  | 15.15  | 18.93  | -3.78 |
| 5-Methoxy-2-pentanone                | 123.30 | 31.47  | 35.25  | -3.78 |
| Ethyl propanoate                     | 107.00 | 27.00  | 30.78  | -3.78 |
| Ethyl isobutanoate                   | 123.40 | 31.50  | 35.28  | -3.78 |
| 3,7-Dimethyl-1,3,7-octatriene        | 159.30 | 48.91  | 45.13  | 3.78  |
| 2-Oxiranylmethanol                   | 71.00  | 17.13  | 20.91  | -3.78 |
| Butyl caproate                       | 190.40 | 49.88  | 53.66  | -3.78 |
| Amyl formate                         | 124.30 | 31.75  | 35.53  | -3.78 |
| 1-Benzylpiperidine                   | 183.70 | 55.60  | 51.82  | 3.78  |
| 4-Ethyl-3-oxa-5-oxo-1-octanol        | 180.00 | 47.03  | 50.81  | -3.78 |
| tert-Butyl 3-oxobutanoate            | 157.50 | 40.86  | 44.64  | -3.78 |
| 3-Methylbutanoic acid                | 106.20 | 26.79  | 30.56  | -3.77 |
| 1-Indanone                           | 123.60 | 39.11  | 35.34  | 3.77  |
| Formanilide                          | 112.50 | 36.06  | 32.29  | 3.77  |
| 2-Chloro-3,3-difluoro-2-propen-1-ol  | 88.60  | 21.97  | 25.74  | -3.77 |
| Methyl chlorofluorophosphate         | 84.00  | 20.71  | 24.48  | -3.77 |
| 4-Methyl-1,3-dioxolane               | 86.80  | 21.48  | 25.24  | -3.76 |
| Ethyl pivalate                       | 140.10 | 36.10  | 39.86  | -3.76 |
| Tributyloctylphosphonium dimedonate  | 507.80 | 144.48 | 140.72 | 3.76  |
| 1,3,6-Tricyanohexane                 | 165.00 | 42.93  | 46.69  | -3.76 |
| Acetoin                              | 88.90  | 22.06  | 25.82  | -3.76 |
| 1,2-Dipropoxyethane                  | 164.40 | 42.77  | 46.53  | -3.76 |
| Butyl propanoate                     | 140.30 | 36.16  | 39.92  | -3.76 |
| 1-Phenyl-3-butene                    | 143.20 | 44.47  | 40.71  | 3.76  |
| Diethyl glutaconate                  | 179.30 | 46.86  | 50.61  | -3.75 |
| Dibutyl phosphite                    | 191.10 | 50.10  | 53.85  | -3.75 |
| Dibutoxymethane                      | 181.00 | 47.33  | 51.08  | -3.75 |

|                                                 |        |        |        |       |
|-------------------------------------------------|--------|--------|--------|-------|
| 1-Methyl-4-isopropyl-2-nitrobenzene             | 169.00 | 51.54  | 47.79  | 3.75  |
| 2-Methylhexanoic acid                           | 139.10 | 35.84  | 39.59  | -3.75 |
| Methyl methanesulfonate                         | 85.90  | 21.25  | 25.00  | -3.75 |
| Triethyl aconitate                              | 239.60 | 63.41  | 67.15  | -3.74 |
| Ethyl ethanethiolsulfinate                      | 120.50 | 38.23  | 34.49  | 3.74  |
| 1,1-Bis(isobutylthio)ethane                     | 214.60 | 64.04  | 60.30  | 3.74  |
| Propylsulfonyl fluoride                         | 98.50  | 24.71  | 28.45  | -3.74 |
| n-Hexylformate                                  | 141.00 | 36.37  | 40.11  | -3.74 |
| Ethyl 2-methylacetoacetate                      | 141.80 | 36.59  | 40.33  | -3.74 |
| Neopentylidenebromide                           | 130.00 | 40.83  | 37.09  | 3.74  |
| 1,2,4,5-Tetrafluorobenzene                      | 103.00 | 25.95  | 29.69  | -3.74 |
| Methyl carbamate                                | 68.40  | 16.46  | 20.20  | -3.74 |
| 1-Fluoropentane                                 | 99.90  | 25.10  | 28.84  | -3.74 |
| Benzoyl chloride                                | 116.60 | 37.15  | 33.42  | 3.73  |
| 4-Chloroacetophenone                            | 132.90 | 41.62  | 37.89  | 3.73  |
| Ethyl iodide                                    | 69.50  | 24.23  | 20.50  | 3.73  |
| Phenyl phosphorodichloridate                    | 147.60 | 45.65  | 41.92  | 3.73  |
| 1-Octyl-3-methylimidazolium<br>tetracyanoborate | 323.40 | 86.41  | 90.14  | -3.73 |
| Propyl valerate                                 | 157.00 | 40.77  | 44.50  | -3.73 |
| 2,4,6-Trimethylchroman                          | 179.40 | 54.37  | 50.64  | 3.73  |
| 1,3-Dibromo-2,2-dimethylpropane                 | 130.40 | 40.93  | 37.20  | 3.73  |
| 1,1-Diethoxycyclohexane                         | 185.80 | 48.67  | 52.40  | -3.73 |
| 3-Chlorobutanoic acid                           | 103.80 | 26.18  | 29.91  | -3.73 |
| Propylisopropoxyphosphinic chloride             | 156.30 | 40.58  | 44.31  | -3.73 |
| 1-Ethyl-3-methylimidazolium L-alanine           | 198.30 | 52.10  | 55.83  | -3.73 |
| Dibutyl decanephosphonate                       | 356.60 | 95.52  | 99.25  | -3.73 |
| Ethyl diethylmalonate                           | 217.00 | 57.23  | 60.96  | -3.73 |
| 4-Hexylacetophenone                             | 217.70 | 64.87  | 61.15  | 3.72  |
| Methyl 3-methylbutyrate                         | 123.00 | 31.45  | 35.17  | -3.72 |
| Ethyl hexadecanoate                             | 323.70 | 86.50  | 90.22  | -3.72 |
| Butyl pentanoate                                | 173.40 | 45.28  | 49.00  | -3.72 |
| Methyl tris(2,2-diethylhydrazino)silane         | 317.60 | 92.26  | 88.55  | 3.71  |
| Pyruvic acid                                    | 75.60  | 18.46  | 22.17  | -3.71 |
| 1,2-Dibromopentane                              | 131.30 | 41.16  | 37.45  | 3.71  |
| 2-Methyl-4-crotylphenol                         | 168.10 | 51.25  | 47.54  | 3.71  |
| 3,4-Dibromoheptane                              | 163.80 | 50.07  | 46.36  | 3.71  |
| 5-Methyltetralin                                | 154.40 | 47.49  | 43.79  | 3.70  |
| 2-Hydroxyethylmethacrylate                      | 126.80 | 32.51  | 36.21  | -3.70 |
| Dioctyl ethylphosphonate                        | 359.00 | 96.20  | 99.90  | -3.70 |
| Tri(t-butoxy)borine                             | 251.70 | 66.77  | 70.47  | -3.70 |
| Dimethylperoxide                                | 64.40  | 15.40  | 19.10  | -3.70 |
| Butyl octanoate                                 | 223.90 | 59.15  | 62.85  | -3.70 |
| Nonadecylbenzene                                | 399.50 | 114.71 | 111.01 | 3.70  |
| 2,3-Dibromoheptane                              | 163.80 | 50.06  | 46.36  | 3.70  |
| Dipropyl phosphite                              | 157.70 | 41.00  | 44.69  | -3.69 |
| 3-(Triethoxysilyl)-1-propanamine                | 224.20 | 59.24  | 62.93  | -3.69 |
| 1-Methyltetralin                                | 154.60 | 47.53  | 43.84  | 3.69  |
| Hexyl butanoate                                 | 190.40 | 49.97  | 53.66  | -3.69 |

|                                                                 |        |        |        |       |
|-----------------------------------------------------------------|--------|--------|--------|-------|
| s-Butylformate                                                  | 107.20 | 27.15  | 30.84  | -3.69 |
| Amyl acetate                                                    | 140.30 | 36.23  | 39.92  | -3.69 |
| 3-Methyl-4-heptanol                                             | 152.80 | 39.66  | 43.35  | -3.69 |
| Allyl trans-cinnamate                                           | 183.60 | 55.48  | 51.79  | 3.69  |
| s-Butyl propionate                                              | 139.70 | 36.07  | 39.75  | -3.68 |
| 4-Chloroethylbenzene                                            | 129.80 | 40.72  | 37.04  | 3.68  |
| 1,4-Bis(hexanoyloxy)-2-butyne                                   | 292.60 | 78.01  | 81.69  | -3.68 |
| 4-Butylacetophenone                                             | 184.50 | 55.72  | 52.04  | 3.68  |
| 4-Oxo-1-heptanol                                                | 138.70 | 35.80  | 39.48  | -3.68 |
| 1,2-Dibromohexane                                               | 147.90 | 45.68  | 42.00  | 3.68  |
| 1-Fluorohexane                                                  | 116.60 | 29.74  | 33.42  | -3.68 |
| Bis(trihexylsilyl)acetylene                                     | 688.30 | 193.90 | 190.23 | 3.67  |
| cis-alpha-Bisabolene                                            | 228.90 | 67.89  | 64.22  | 3.67  |
| 2-Cyanoethanol                                                  | 71.80  | 17.46  | 21.13  | -3.67 |
| Ethyl 4-methylpentanoate                                        | 156.20 | 40.61  | 44.28  | -3.67 |
| 2-Bromopyridine                                                 | 97.30  | 31.79  | 28.12  | 3.67  |
| Octanoic anhydride                                              | 292.40 | 77.97  | 81.64  | -3.67 |
| 1,2,3,4-Tetrahydronaphthalene                                   | 138.50 | 43.09  | 39.42  | 3.67  |
| 3-Methoxypropionitrile                                          | 89.10  | 22.21  | 25.87  | -3.66 |
| Isopropylpropoxyphosphinic chloride                             | 156.40 | 40.67  | 44.33  | -3.66 |
| n-Heptylformate                                                 | 157.70 | 41.03  | 44.69  | -3.66 |
| 4-Ethyl-o-xylene                                                | 147.60 | 45.58  | 41.92  | 3.66  |
| 2-Fluoro-2-methylbutane                                         | 99.00  | 24.93  | 28.59  | -3.66 |
| 7-(3-Phenylpropyl)-7-tridecanol                                 | 356.00 | 102.74 | 99.08  | 3.66  |
| t-Butylformate                                                  | 106.80 | 27.07  | 30.73  | -3.66 |
| Acetol                                                          | 72.60  | 17.69  | 21.35  | -3.66 |
| 2-Ethylthiovinyl diallyloxy phosphorus oxide                    | 225.70 | 67.00  | 63.34  | 3.66  |
| Pentylphosphinic dichloride                                     | 144.80 | 44.81  | 41.15  | 3.66  |
| Dibutyl 3-oxo-2-butyl phosphate                                 | 265.90 | 70.71  | 74.37  | -3.66 |
| Bis(2-hydroxyethyl)methylamine                                  | 124.00 | 31.79  | 35.45  | -3.66 |
| Ethyl N-butylcarbamate                                          | 152.40 | 39.58  | 43.24  | -3.66 |
| Ethyl chlorofluorophosphate                                     | 100.80 | 25.43  | 29.08  | -3.65 |
| 5-Ethyl-m-xylene                                                | 148.10 | 45.71  | 42.06  | 3.65  |
| Dibutyl pentanephosphonate                                      | 273.10 | 72.69  | 76.34  | -3.65 |
| 3,5-Diethyltoluene                                              | 164.00 | 50.07  | 46.42  | 3.65  |
| 1,2-Dibutoxyethane                                              | 197.80 | 52.04  | 55.69  | -3.65 |
| Butyl butanoate                                                 | 157.00 | 40.85  | 44.50  | -3.65 |
| Butyl enanthate                                                 | 207.20 | 54.62  | 58.27  | -3.65 |
| Methyl octanoate                                                | 173.40 | 45.35  | 49.00  | -3.65 |
| Dibutyl hexanephosphonate                                       | 289.80 | 77.28  | 80.92  | -3.64 |
| cis-1,2,3,5,6,8a-Hexahydro-4,7-dimethyl-1-isopropyl-naphthalene | 224.30 | 66.60  | 62.96  | 3.64  |
| Tris(2-pentoxyethyl) phosphite                                  | 438.80 | 118.15 | 121.79 | -3.64 |
| Ethyltriethoxysilane                                            | 195.80 | 51.50  | 55.14  | -3.64 |
| Etohexadiol                                                     | 161.60 | 42.12  | 45.76  | -3.64 |
| 1-Chloro-2-isopropylbenzene                                     | 146.40 | 45.23  | 41.59  | 3.64  |
| Bis(2-ethylhexyl) sebacate                                      | 467.30 | 125.97 | 129.61 | -3.64 |
| Pentyl octanoate                                                | 240.60 | 63.79  | 67.43  | -3.64 |
| 1,3-Dinitropropane                                              | 108.00 | 27.42  | 31.06  | -3.64 |



|                                              |        |       |       |       |
|----------------------------------------------|--------|-------|-------|-------|
| 4-(3-Cyclohexen-1-yl)pyridine                | 161.50 | 49.37 | 45.73 | 3.64  |
| Octyl propanoate                             | 207.30 | 54.66 | 58.29 | -3.63 |
| 1,4-Bis(3-aminopropoxy)butane                | 221.30 | 58.50 | 62.13 | -3.63 |
| Isopropyl 3-methylbutanoate                  | 156.00 | 40.59 | 44.22 | -3.63 |
| 4-Methyl-2-nitrophenol                       | 130.20 | 40.78 | 37.15 | 3.63  |
| Ethyl 2-hydroxy-3-butenate                   | 126.50 | 32.50 | 36.13 | -3.63 |
| Anatabine                                    | 156.60 | 48.02 | 44.39 | 3.63  |
| sec-Butyl hydroperoxide                      | 96.60  | 24.30 | 27.93 | -3.63 |
| Sparteine                                    | 240.90 | 71.14 | 67.51 | 3.63  |
| Chloro dipropoxyborine                       | 160.50 | 41.83 | 45.46 | -3.63 |
| Diethylamino chlorofluorothiophosphate       | 143.20 | 44.34 | 40.71 | 3.63  |
| 5-Phenylnonane                               | 231.00 | 68.42 | 64.80 | 3.62  |
| Trimethylacetic acid                         | 106.20 | 26.94 | 30.56 | -3.62 |
| 2-Butylthiovinyl diallyloxy phosphorus oxide | 258.20 | 75.88 | 72.26 | 3.62  |
| 1,1-Dimethylbutyl acetate                    | 155.00 | 40.33 | 43.95 | -3.62 |
| 1-Ethyl-2,4,5-trimethylbenzene               | 163.90 | 50.01 | 46.39 | 3.62  |
| Vinyltrimethoxysilane                        | 140.70 | 36.41 | 40.03 | -3.62 |
| 4-Bromo-1,2-butadiene                        | 85.80  | 28.58 | 24.97 | 3.61  |
| (Chloromethyl)benzene                        | 113.00 | 36.04 | 32.43 | 3.61  |
| 1,1-Diethoxypropane                          | 147.20 | 38.20 | 41.81 | -3.61 |
| 2-Ethylaniline                               | 126.60 | 39.77 | 36.16 | 3.61  |
| N-Isobutylaniline                            | 161.20 | 49.26 | 45.65 | 3.61  |
| 2,2-Propanedithiol                           | 98.20  | 31.98 | 28.37 | 3.61  |
| 1-Hexylhydroperoxide                         | 130.50 | 33.62 | 37.23 | -3.61 |
| 1-Fluoroheptane                              | 133.30 | 34.39 | 38.00 | -3.61 |
| Dodecyl acetate                              | 257.40 | 68.43 | 72.04 | -3.61 |
| Isopentyl propionate                         | 156.70 | 40.81 | 44.42 | -3.61 |
| Allyltrichlorosilane                         | 123.70 | 38.97 | 35.36 | 3.61  |
| 2-Heptanoylthiophene                         | 194.70 | 58.44 | 54.84 | 3.60  |
| Pentyl hydroperoxide                         | 113.80 | 29.05 | 32.65 | -3.60 |
| Diethyl phosphite                            | 124.30 | 31.93 | 35.53 | -3.60 |
| Dibutyldisulfide                             | 182.80 | 55.17 | 51.57 | 3.60  |
| n-Hexanoic acid                              | 123.30 | 31.66 | 35.25 | -3.59 |
| Propyl isovalerate                           | 156.80 | 40.85 | 44.44 | -3.59 |
| Bis(ethyltrimethylsilyl)amine                | 204.10 | 61.01 | 57.42 | 3.59  |
| 3-Propoxypropanenitrile                      | 122.60 | 31.47 | 35.06 | -3.59 |
| Butanedial                                   | 83.40  | 20.72 | 24.31 | -3.59 |
| Chloro dibutoxyborine                        | 193.90 | 51.03 | 54.62 | -3.59 |
| 2,2-Diethoxypropane                          | 146.90 | 38.14 | 41.73 | -3.59 |
| 2,2-Bis(propylthio)-1-propanol               | 206.60 | 61.69 | 58.10 | 3.59  |
| 2,6-Dimethylpyridine-1-oxide                 | 119.10 | 37.69 | 34.10 | 3.59  |
| 1-Ethyl-3-methylimidazolium L-serine         | 204.90 | 54.05 | 57.64 | -3.59 |
| 1,3-Dioxane                                  | 86.30  | 21.52 | 25.11 | -3.59 |
| sec-Amyl acetate                             | 138.90 | 35.95 | 39.53 | -3.58 |
| Benzo[b]furan                                | 109.60 | 35.08 | 31.50 | 3.58  |
| 1-Butyl-3-methylimidazolium methosulfate     | 221.40 | 58.58 | 62.16 | -3.58 |
| 1,2-Dibromo-2-methylpropane                  | 114.20 | 36.34 | 32.76 | 3.58  |
| 2-Methylheptyl acetate                       | 190.00 | 49.97 | 53.55 | -3.58 |

|                                        |        |        |        |       |
|----------------------------------------|--------|--------|--------|-------|
| 1-Bromo-1,1,5-trichloropentane         | 155.30 | 47.61  | 44.03  | 3.58  |
| 2-Chloro-1-ethylbenzene                | 129.60 | 40.56  | 36.98  | 3.58  |
| Ethyl caprylate                        | 190.50 | 50.11  | 53.69  | -3.58 |
| Isopropylisopropoxyphosphinic chloride | 155.90 | 40.62  | 44.20  | -3.58 |
| Isopropyl formate                      | 90.60  | 22.71  | 26.29  | -3.58 |
| Isobutyl formate                       | 107.40 | 27.32  | 30.89  | -3.57 |
| 3-Butoxypropanenitrile                 | 139.30 | 36.07  | 39.64  | -3.57 |
| 1,1-Bis(ethylthio)ethane               | 148.50 | 45.74  | 42.17  | 3.57  |
| 2,4-Xylidine                           | 127.10 | 39.87  | 36.30  | 3.57  |
| 1-Indanamine                           | 133.30 | 41.57  | 38.00  | 3.57  |
| Methyltributoxysilane                  | 279.00 | 74.39  | 77.96  | -3.57 |
| Methyl decanoate                       | 207.10 | 54.67  | 58.24  | -3.57 |
| 1,2-Dibromoheptane                     | 164.70 | 50.18  | 46.61  | 3.57  |
| Pentyl pentanoate                      | 190.40 | 50.09  | 53.66  | -3.57 |
| N,N-Dimethylthioformamide              | 86.50  | 28.73  | 25.16  | 3.57  |
| 3-Methylvaleric acid                   | 122.50 | 31.47  | 35.04  | -3.57 |
| 1,3-Diethylbenzene                     | 147.80 | 45.54  | 41.97  | 3.57  |
| Acetic acid 2-chloroethylester         | 104.40 | 26.51  | 30.07  | -3.56 |
| Diethylphenyl 1-isopropoxyethoxysilane | 274.40 | 80.26  | 76.70  | 3.56  |
| alpha-Ionone                           | 205.10 | 61.25  | 57.69  | 3.56  |
| 1-Bromo-3-fluorobenzene                | 106.70 | 34.26  | 30.70  | 3.56  |
| 1-Fluorooctane                         | 150.00 | 39.02  | 42.58  | -3.56 |
| Mustard oil                            | 92.20  | 30.28  | 26.72  | 3.56  |
| Isopropyl propionate                   | 122.90 | 31.59  | 35.15  | -3.56 |
| Dibutyl nonanephosphonate              | 339.90 | 91.11  | 94.66  | -3.55 |
| 4-t-Butylacetophenone                  | 183.90 | 55.43  | 51.88  | 3.55  |
| 2-Chloroethyl acetoacetate             | 139.70 | 36.20  | 39.75  | -3.55 |
| Isobutyl acetate                       | 123.00 | 31.62  | 35.17  | -3.55 |
| 3-Phenyl-2-propyn-1-ol                 | 132.10 | 41.22  | 37.67  | 3.55  |
| Indane                                 | 121.60 | 38.34  | 34.79  | 3.55  |
| 1,4-Dibromopentane                     | 131.30 | 41.00  | 37.45  | 3.55  |
| 3-Vinylpyridine                        | 106.00 | 34.06  | 30.51  | 3.55  |
| 1-Acetoxy-2-methyl-4-oxoheptane        | 190.00 | 50.00  | 53.55  | -3.55 |
| Methylhydroperoxide                    | 46.90  | 10.75  | 14.30  | -3.55 |
| Ethyl isovalerate                      | 139.50 | 36.15  | 39.70  | -3.55 |
| Hexadecylbenzene                       | 349.30 | 100.79 | 97.24  | 3.55  |
| Methyl 3-chlorobutyrate                | 120.90 | 31.05  | 34.60  | -3.55 |
| Tris(2-hexoxyethyl) phosphite          | 488.90 | 131.99 | 135.53 | -3.54 |
| Ethyl cyanoformate                     | 91.50  | 22.99  | 26.53  | -3.54 |
| 2-Hexanoylthiophene                    | 178.00 | 53.80  | 50.26  | 3.54  |
| Methyl undecanoate                     | 223.80 | 59.28  | 62.82  | -3.54 |
| 4-Fluorophenyltrimethylsilane          | 165.40 | 50.34  | 46.80  | 3.54  |
| 3-Phenylpropene                        | 127.10 | 39.83  | 36.30  | 3.53  |
| 1-Chloro-3-ethylbenzene                | 129.80 | 40.57  | 37.04  | 3.53  |
| Fluoroacetone                          | 68.60  | 16.72  | 20.25  | -3.53 |
| 1-Nonyl hydroperoxide                  | 180.60 | 47.44  | 50.97  | -3.53 |
| 2,3-Dibromobutane                      | 114.20 | 36.29  | 32.76  | 3.53  |
| Cyclopentylbenzene                     | 155.40 | 47.59  | 44.06  | 3.53  |
| Ethyl decanoate                        | 223.80 | 59.29  | 62.82  | -3.53 |

|                                                       |        |        |        |       |
|-------------------------------------------------------|--------|--------|--------|-------|
| 2-Methyl-4-oxo-1-heptanol                             | 155.00 | 40.42  | 43.95  | -3.53 |
| Pentamethylbenzene                                    | 163.10 | 49.70  | 46.17  | 3.53  |
| 2-Isobutylthiophene                                   | 144.40 | 44.57  | 41.04  | 3.53  |
| t-Butylhydroperoxide                                  | 96.80  | 24.46  | 27.99  | -3.53 |
| Cyclobutylphenylketone                                | 159.10 | 48.60  | 45.07  | 3.53  |
| Safranal                                              | 155.20 | 47.53  | 44.00  | 3.53  |
| 1,4-Bis(heptanoyloxy)-2-butyne                        | 326.00 | 87.33  | 90.85  | -3.52 |
| Isopentyl butanoate                                   | 173.20 | 45.42  | 48.94  | -3.52 |
| 1,1-Bis(trimethylsilyl)-2,2-dichlorocyclopropane      | 233.20 | 68.92  | 65.40  | 3.52  |
| Dibutyl heptanephosphonate                            | 306.60 | 82.01  | 85.53  | -3.52 |
| 2-Hydroxy-5-methylbenzaldehyde                        | 126.20 | 39.57  | 36.05  | 3.52  |
| Glycidyl acrylate                                     | 120.40 | 30.94  | 34.46  | -3.52 |
| 1,1-Diethoxy-N,N-dimethylmethanamine                  | 159.30 | 41.61  | 45.13  | -3.52 |
| Isohexanoic acid                                      | 122.40 | 31.49  | 35.01  | -3.52 |
| 2-Thiophenecarbaldehyde                               | 94.60  | 30.90  | 27.38  | 3.52  |
| Dibutoxy ethylaminoborane                             | 225.90 | 59.88  | 63.40  | -3.52 |
| 2-Methylpropanoic acid                                | 89.80  | 22.55  | 26.07  | -3.52 |
| 2-Nitroethanol                                        | 77.00  | 19.04  | 22.56  | -3.52 |
| Heptadecylbenzene                                     | 366.30 | 105.42 | 101.91 | 3.51  |
| Isopentyl formate                                     | 123.80 | 31.88  | 35.39  | -3.51 |
| 2,6-Dinitrotoluene                                    | 143.00 | 44.17  | 40.66  | 3.51  |
| Phenyldichlorofluoromethane                           | 132.50 | 41.29  | 37.78  | 3.51  |
| Isobutyl urethane                                     | 152.20 | 39.67  | 43.18  | -3.51 |
| 3,5-Xylidine                                          | 127.40 | 39.89  | 36.38  | 3.51  |
| 2-Ethyl-p-xylene                                      | 148.00 | 45.54  | 42.03  | 3.51  |
| Dimethylether                                         | 54.30  | 12.82  | 16.33  | -3.51 |
| Methylenanthate                                       | 157.00 | 40.99  | 44.50  | -3.51 |
| Piperitenone                                          | 154.90 | 47.43  | 43.92  | 3.51  |
| s-Butyl pentanoate                                    | 172.60 | 45.27  | 48.78  | -3.51 |
| Tetrahydro-2H-pyran-2-one                             | 96.10  | 24.29  | 27.79  | -3.50 |
| 1-Decyl-3-methylimidazolium tetracyanoborate          | 356.30 | 95.66  | 99.16  | -3.50 |
| N,N-Dimethyl-N'-benzyl-1,2-ethanediamine              | 189.70 | 56.97  | 53.47  | 3.50  |
| Acetone glycerol                                      | 126.50 | 32.63  | 36.13  | -3.50 |
| Methylcyclohexyldifluorosilane                        | 152.20 | 39.68  | 43.18  | -3.50 |
| 3-Bromocyclohexene                                    | 113.00 | 35.93  | 32.43  | 3.50  |
| Butyl ethoxyethoxy S-(2-cyanoethyl) dithiophosphinate | 273.20 | 79.87  | 76.37  | 3.50  |
| 6-Undecanol                                           | 204.00 | 53.89  | 57.39  | -3.50 |
| 2-Ethyl-1,3,5-trimethylbenzene                        | 164.30 | 50.00  | 46.50  | 3.50  |
| Ethyl hydroperoxide                                   | 63.70  | 15.41  | 18.91  | -3.50 |
| Pentyl hexanoate                                      | 207.20 | 54.77  | 58.27  | -3.50 |
| Isopropyl butyrate                                    | 139.60 | 36.23  | 39.73  | -3.50 |
| Ethyl nonanoate                                       | 206.90 | 54.69  | 58.19  | -3.50 |
| Ethylmethylether                                      | 71.20  | 17.47  | 20.96  | -3.49 |
| 3-Pentyloxypropanenitrile                             | 156.00 | 40.73  | 44.22  | -3.49 |
| Dipentyl phosphite                                    | 224.50 | 59.52  | 63.01  | -3.49 |
| Methyl methanethiosulfinate                           | 87.00  | 28.79  | 25.30  | 3.49  |
| 2-Methylpentanoic acid                                | 121.90 | 31.38  | 34.87  | -3.49 |

|                                                                                 |        |        |        |       |
|---------------------------------------------------------------------------------|--------|--------|--------|-------|
| 2,4-Pentanediol                                                                 | 110.30 | 28.20  | 31.69  | -3.49 |
| Dipropyl disulfide                                                              | 149.40 | 45.90  | 42.41  | 3.49  |
| Methyl N-nitro-N-ethylcarbamate                                                 | 124.80 | 32.18  | 35.67  | -3.49 |
| 2,2-Dimethylbutanoic acid                                                       | 121.70 | 31.33  | 34.82  | -3.49 |
| Hexadecamethylheptasiloxane                                                     | 500.90 | 142.31 | 138.82 | 3.49  |
| 2-Methylbutyric acid                                                            | 105.20 | 26.81  | 30.29  | -3.48 |
| 5-Methyl-3-hexanol                                                              | 136.70 | 35.45  | 38.93  | -3.48 |
| 1,4-Difluorooctachlorobutane                                                    | 196.60 | 58.84  | 55.36  | 3.48  |
| t-Amylhydroperoxide                                                             | 113.00 | 28.95  | 32.43  | -3.48 |
| 3-Methyl-1-pentanol                                                             | 119.70 | 30.79  | 34.27  | -3.48 |
| Bromo ethylthio isopropylborane                                                 | 146.30 | 45.04  | 41.56  | 3.48  |
| 1,1-Bis(ethylthio)propane                                                       | 181.60 | 54.72  | 51.25  | 3.47  |
| Octylphosphinic dichloride                                                      | 194.80 | 58.34  | 54.87  | 3.47  |
| 1-(4-Isopropylphenyl)ethanone                                                   | 167.50 | 50.85  | 47.38  | 3.47  |
| Methyl cyclohexanecarboxylate                                                   | 145.60 | 37.90  | 41.37  | -3.47 |
| Ethyl 2-ethylacetoacetate                                                       | 156.10 | 40.78  | 44.25  | -3.47 |
| 1-Chloro-2-phenylethane                                                         | 129.70 | 40.48  | 37.01  | 3.47  |
| Isobutyl isobutyrate                                                            | 156.60 | 40.92  | 44.39  | -3.47 |
| 7-Bromo-1,5,5-trichloroheptane                                                  | 188.30 | 56.55  | 53.08  | 3.47  |
| 2-Ethylbutyl acetate                                                            | 155.90 | 40.73  | 44.20  | -3.47 |
| 4-Fluoro-1-trichloromethoxybenzene                                              | 154.80 | 47.36  | 43.89  | 3.47  |
| Ethyl 4-methyl-3-oxopentanoate                                                  | 157.90 | 41.28  | 44.75  | -3.47 |
| 2-Ethoxyethyl acrylate                                                          | 144.80 | 37.69  | 41.15  | -3.46 |
| Tetra(dimethylamino)silane                                                      | 205.60 | 61.29  | 57.83  | 3.46  |
| Methyl cyclopropanecarboxylate                                                  | 100.10 | 25.43  | 28.89  | -3.46 |
| Bis(2-ethylhexyl) adipate                                                       | 399.20 | 107.47 | 110.93 | -3.46 |
| Mesoxalic acid diethylester oxime                                               | 165.50 | 43.37  | 46.83  | -3.46 |
| 1-Methyl-3-propylimidazolium threoninate                                        | 239.80 | 63.75  | 67.21  | -3.46 |
| Methanesulfonic acid                                                            | 68.70  | 16.82  | 20.28  | -3.46 |
| N-(3-(Trimethoxysilyl)propyl)-1,2-ethanediamine                                 | 219.60 | 58.21  | 61.67  | -3.46 |
| 4-Chloroaniline                                                                 | 109.80 | 35.01  | 31.55  | 3.46  |
| Diethylperoxide                                                                 | 97.90  | 24.83  | 28.29  | -3.46 |
| 1-Crotyl-2-pyridone                                                             | 147.50 | 45.35  | 41.89  | 3.46  |
| 1-Isopropyl-4-nitrobenzene                                                      | 155.60 | 47.57  | 44.11  | 3.46  |
| Bromotrichloromethane                                                           | 89.00  | 29.30  | 25.85  | 3.45  |
| Pentanoic anhydride                                                             | 192.20 | 50.70  | 54.15  | -3.45 |
| (2-Chloro-1,1-dimethylethyl)benzene                                             | 162.10 | 49.35  | 45.90  | 3.45  |
| Ethylcyclohexyldifluorosilane                                                   | 168.90 | 44.31  | 47.76  | -3.45 |
| Ethyl N-phenylformimidate                                                       | 148.80 | 45.70  | 42.25  | 3.45  |
| 1-Heptylhydroperoxide                                                           | 147.20 | 38.36  | 41.81  | -3.45 |
| n-Octanoic acid                                                                 | 156.60 | 40.94  | 44.39  | -3.45 |
| t-Butylacetate                                                                  | 122.00 | 31.45  | 34.90  | -3.45 |
| (Diethylamino fluoro thiophosphorus)<br>(bis(diethylamino) oxophosphorus) oxide | 314.30 | 91.09  | 87.64  | 3.45  |
| Thiophosgene                                                                    | 70.00  | 24.08  | 20.64  | 3.44  |
| 2-Oxetanone                                                                     | 64.20  | 15.60  | 19.04  | -3.44 |
| 2-Chlorobutanoic acid methylester                                               | 120.70 | 31.10  | 34.54  | -3.44 |
| Isopropyl acetoacetate                                                          | 141.80 | 36.89  | 40.33  | -3.44 |

|                                          |        |        |        |       |
|------------------------------------------|--------|--------|--------|-------|
| Methyl laurate                           | 240.20 | 63.88  | 67.32  | -3.44 |
| 3-Ethyl-o-xylene                         | 147.50 | 45.33  | 41.89  | 3.44  |
| Dibutyl hexadecanephosphonate            | 456.90 | 123.32 | 126.76 | -3.44 |
| Hexanoic anhydride                       | 225.60 | 59.88  | 63.31  | -3.43 |
| p-Toluidine                              | 112.30 | 35.67  | 32.24  | 3.43  |
| Dibutyl octanephosphonate                | 323.30 | 86.68  | 90.11  | -3.43 |
| Lactonitrile                             | 71.70  | 17.67  | 21.10  | -3.43 |
| Isopropyl hydroperoxide                  | 80.30  | 20.03  | 23.46  | -3.43 |
| Hexyl hexanoate                          | 223.80 | 59.39  | 62.82  | -3.43 |
| Ethyl 2-chlorobutanoate                  | 137.50 | 35.72  | 39.15  | -3.43 |
| 1-Fluorodecane                           | 183.40 | 48.31  | 51.74  | -3.43 |
| Dipropylperoxide                         | 131.30 | 34.02  | 37.45  | -3.43 |
| 3-Chlorobenzaldehyde                     | 116.80 | 36.90  | 33.47  | 3.43  |
| 1,2-Dibromopropane                       | 98.10  | 31.77  | 28.34  | 3.43  |
| 4-Oxopentanal                            | 99.50  | 25.30  | 28.73  | -3.43 |
| s-Butylacetate                           | 121.70 | 31.39  | 34.82  | -3.43 |
| 2-Octanol                                | 154.00 | 40.25  | 43.68  | -3.43 |
| Methylpropylether                        | 87.90  | 22.12  | 25.55  | -3.43 |
| Ethyl 2-ethylcaproate                    | 189.40 | 49.96  | 53.39  | -3.43 |
| 2-Chloro-1,1-diethoxyethane              | 144.70 | 37.70  | 41.12  | -3.42 |
| 1,4-Bis(acetoxy)-2-butyne                | 156.40 | 40.91  | 44.33  | -3.42 |
| 4-Propyltoluene                          | 148.50 | 45.59  | 42.17  | 3.42  |
| 1,1-Dinitropropane                       | 108.20 | 27.69  | 31.11  | -3.42 |
| Methyltripentyloxysilane                 | 328.80 | 88.20  | 91.62  | -3.42 |
| Dibutyl butanephosphonate                | 256.50 | 68.37  | 71.79  | -3.42 |
| (Ethoxymethyl)oxirane                    | 106.80 | 27.31  | 30.73  | -3.42 |
| Adiponitrile                             | 114.20 | 29.34  | 32.76  | -3.42 |
| 1-Fluorononane                           | 166.70 | 43.74  | 47.16  | -3.42 |
| Ethyl 3-chlorobutanoate                  | 137.20 | 35.65  | 39.07  | -3.42 |
| Ethyl cyclopropanecarboxylate            | 116.60 | 30.00  | 33.42  | -3.42 |
| 1,1-Diethoxycyclopentane                 | 169.90 | 44.62  | 48.04  | -3.42 |
| 1-Tetralone                              | 140.80 | 43.47  | 40.05  | 3.42  |
| E-beta-Caryophyllene                     | 223.20 | 66.07  | 62.66  | 3.41  |
| Pivalophenone                            | 165.60 | 50.27  | 46.86  | 3.41  |
| 1,3-Diaminobenzene                       | 106.10 | 33.95  | 30.54  | 3.41  |
| Oxiranecarboxaldehyde                    | 66.30  | 16.21  | 19.62  | -3.41 |
| Ethyl acetoacetate                       | 122.30 | 31.57  | 34.98  | -3.41 |
| 3,4-Dimethylacetophenone                 | 150.70 | 46.18  | 42.77  | 3.41  |
| Bis(ethylthio)borane                     | 132.40 | 41.16  | 37.75  | 3.41  |
| Isoamyl acetate                          | 139.90 | 36.40  | 39.81  | -3.41 |
| S,S-Dimethyldithiocarbonate              | 102.00 | 32.82  | 29.41  | 3.41  |
| Bis(diethylsilyl)amine                   | 206.20 | 61.40  | 57.99  | 3.41  |
| Caproic aldehyde                         | 114.30 | 29.38  | 32.79  | -3.41 |
| Ethyl undecanoate                        | 240.30 | 63.94  | 67.35  | -3.41 |
| Ethoxydichloromethylsulfenyl chloride    | 131.50 | 40.91  | 37.50  | 3.41  |
| 2-Propyn-1-formate                       | 80.90  | 20.22  | 23.63  | -3.41 |
| 1,3-Dimethoxy-1-ethoxy-5-methyl-4-hexene | 215.90 | 57.25  | 60.65  | -3.40 |
| 2-(3-Pentenyl)pyridine                   | 155.50 | 47.49  | 44.09  | 3.40  |
| Isopropylacetate                         | 105.50 | 26.97  | 30.37  | -3.40 |

|                                                             |        |        |        |       |
|-------------------------------------------------------------|--------|--------|--------|-------|
| n-Decanoic acid                                             | 189.90 | 50.12  | 53.52  | -3.40 |
| 2-Ethylbutanoic acid                                        | 121.50 | 31.36  | 34.76  | -3.40 |
| n-Octylformate                                              | 174.40 | 45.87  | 49.27  | -3.40 |
| 1,4-Dioxane                                                 | 86.20  | 21.68  | 25.08  | -3.40 |
| Heptyl pentanoate                                           | 223.90 | 59.45  | 62.85  | -3.40 |
| Diethyl disulfide                                           | 116.00 | 36.65  | 33.25  | 3.40  |
| Dihexyl phosphite                                           | 257.80 | 68.75  | 72.15  | -3.40 |
| Pentadecylbenzene                                           | 332.90 | 96.14  | 92.74  | 3.40  |
| 3-Hexyloxypropanenitrile                                    | 172.70 | 45.41  | 48.80  | -3.39 |
| trans-Cyclohexane-1,2-dinitrite                             | 149.80 | 39.13  | 42.52  | -3.39 |
| 1-Octyl hydroperoxide                                       | 163.80 | 42.97  | 46.36  | -3.39 |
| 3-Propyltoluene                                             | 148.50 | 45.56  | 42.17  | 3.39  |
| 2-Pentanoylthiophene                                        | 161.30 | 49.07  | 45.68  | 3.39  |
| Pelargonic acid                                             | 173.20 | 45.55  | 48.94  | -3.39 |
| Aniline                                                     | 94.70  | 30.80  | 27.41  | 3.39  |
| N,N-Dimethylbenzylamine                                     | 144.80 | 44.54  | 41.15  | 3.39  |
| 1-Nitrooctane                                               | 168.30 | 44.21  | 47.60  | -3.39 |
| 3-Chloropropane-1,2-diyl dinitrate                          | 137.60 | 35.79  | 39.18  | -3.39 |
| Tetrahydro-3-furanol                                        | 86.30  | 21.72  | 25.11  | -3.39 |
| N-t-Butylbenzylamine                                        | 176.60 | 53.26  | 49.87  | 3.39  |
| S-Ethyl-dimethylthioformamidium<br>trifluoromethylsulfonate | 202.60 | 53.62  | 57.01  | -3.39 |
| Dibutyl dodecanephosphonate                                 | 390.10 | 105.05 | 108.43 | -3.38 |
| 2,2-Dimethyloxirane                                         | 80.60  | 20.16  | 23.54  | -3.38 |
| Ethanesulfonic acid                                         | 85.40  | 21.48  | 24.86  | -3.38 |
| Methylsulfonyl fluoride                                     | 65.20  | 15.94  | 19.32  | -3.38 |
| 2-Methyl-1-butyl acetate                                    | 139.90 | 36.43  | 39.81  | -3.38 |
| Tetradecanoic acid                                          | 256.60 | 68.44  | 71.82  | -3.38 |
| Metharbital                                                 | 180.10 | 47.46  | 50.83  | -3.37 |
| Cyclopropanecarboxylic acid                                 | 82.90  | 20.80  | 24.17  | -3.37 |
| 1-Ethyl-3-methylimidazolium aminoacetate                    | 180.90 | 47.68  | 51.05  | -3.37 |
| Glyoxal                                                     | 50.30  | 11.86  | 15.23  | -3.37 |
| Suberonitrile                                               | 147.60 | 38.55  | 41.92  | -3.37 |
| 4-Ethoxyacetanilide                                         | 171.30 | 51.79  | 48.42  | 3.37  |
| 5-Methyl-2-ethylcoumaran                                    | 164.30 | 49.87  | 46.50  | 3.37  |
| 3-Bromopyridine                                             | 97.30  | 31.49  | 28.12  | 3.37  |
| 4-Bromopyridine                                             | 97.30  | 31.49  | 28.12  | 3.37  |
| alpha-Methyl-4-isopropylbenzenepropanal                     | 200.70 | 59.85  | 56.48  | 3.37  |
| 2-Ethylpentanoic acid                                       | 138.10 | 35.95  | 39.31  | -3.36 |
| 2-Methyl-2-phenylpentadecane                                | 348.00 | 100.25 | 96.89  | 3.36  |
| 1,2,3,5-Tetramethylbenzene                                  | 147.70 | 45.31  | 41.95  | 3.36  |
| Isopentyl isopentanoate                                     | 189.50 | 50.05  | 53.41  | -3.36 |
| 2-Bromo-2-chloro-4,4-dimethylpentane                        | 157.40 | 47.97  | 44.61  | 3.36  |
| (5Z,8Z,11Z,14Z)-Eicosatetraenoic acid                       | 331.20 | 95.64  | 92.28  | 3.36  |
| n-Decylacetate                                              | 223.40 | 59.35  | 62.71  | -3.36 |
| 2-Methylbenzoxazole                                         | 120.40 | 37.82  | 34.46  | 3.36  |
| N-Methylaniline                                             | 111.80 | 35.46  | 32.10  | 3.36  |
| 1-Methyl-3-pentylimidazolium threoninate                    | 273.40 | 73.07  | 76.42  | -3.35 |
| 4-Chloronitrobenzene                                        | 120.90 | 37.95  | 34.60  | 3.35  |

|                                                   |        |        |        |       |
|---------------------------------------------------|--------|--------|--------|-------|
| 2-(2-Chloroethoxy)ethanol                         | 111.00 | 28.53  | 31.88  | -3.35 |
| 2-Chlorobenzaldehyde                              | 116.50 | 36.74  | 33.39  | 3.35  |
| 3-Aminobutyronitrile                              | 91.30  | 23.13  | 26.48  | -3.35 |
| Hexyl pentanoate                                  | 207.20 | 54.92  | 58.27  | -3.35 |
| Diethyl thiodipropionate                          | 221.20 | 58.76  | 62.11  | -3.35 |
| Isobutyl isovalerate                              | 173.00 | 45.54  | 48.89  | -3.35 |
| 1-(2-Hydroxy-4-methylphenyl)ethanone              | 141.60 | 43.62  | 40.27  | 3.35  |
| 3,4-Dibromohexane                                 | 147.00 | 45.10  | 41.76  | 3.34  |
| 2-Acetylthiophene                                 | 111.20 | 35.28  | 31.94  | 3.34  |
| Methyl iodide                                     | 52.80  | 19.26  | 15.92  | 3.34  |
| Tetrahydrofurfuryl alcohol                        | 102.40 | 26.18  | 29.52  | -3.34 |
| 3-Amino-1,2-propanediol,                          | 88.80  | 22.45  | 25.79  | -3.34 |
| alpha-Chlorohydrin                                | 93.50  | 23.74  | 27.08  | -3.34 |
| 1-Fluoroundecane                                  | 200.10 | 52.98  | 56.32  | -3.34 |
| 1-Ethyl-3-methylimidazolium ethosulfate           | 204.40 | 54.16  | 57.50  | -3.34 |
| 1,5-Dibromoheptane                                | 164.50 | 49.89  | 46.56  | 3.33  |
| N,N-Bis(2-hydroxyethyl)ethylamine                 | 139.70 | 36.42  | 39.75  | -3.33 |
| 2,3-Dimethylbutanoic acid                         | 121.10 | 31.32  | 34.65  | -3.33 |
| 2-Butoxy-4,4-bis(ethylthio)-butane                | 257.30 | 75.34  | 72.01  | 3.33  |
| 2-Methyl-1,3-dioxolane                            | 86.90  | 21.94  | 25.27  | -3.33 |
| Dimethyl 2-butyndioate                            | 125.80 | 32.61  | 35.94  | -3.33 |
| beta-Methylbenzeneethanamine                      | 142.90 | 43.96  | 40.63  | 3.33  |
| Methanol                                          | 36.90  | 8.23   | 11.56  | -3.33 |
| 2-Nitro-1-propanol                                | 91.80  | 23.29  | 26.61  | -3.32 |
| 2-(2-Vinyloxyethyl)-thiophene                     | 145.80 | 44.75  | 41.43  | 3.32  |
| 2-Thiophenecarbonitrile                           | 92.90  | 30.24  | 26.92  | 3.32  |
| 1,4-Diethylbenzene                                | 148.70 | 45.54  | 42.22  | 3.32  |
| 2-Chlorotoluene                                   | 113.70 | 35.94  | 32.62  | 3.32  |
| 3-Heptanol                                        | 137.20 | 35.75  | 39.07  | -3.32 |
| Dicyanomethane                                    | 64.10  | 15.70  | 19.02  | -3.32 |
| Oxirane                                           | 47.00  | 11.01  | 14.33  | -3.32 |
| (3-Chloropropyl)trimethoxysilane                  | 176.50 | 46.53  | 49.85  | -3.32 |
| Bis(2-chloroethyl)carbonate                       | 145.40 | 38.00  | 41.32  | -3.32 |
| N-Acetyethanolamine                               | 101.10 | 25.85  | 29.17  | -3.32 |
| Dibutyl tetradecanephosphonate                    | 423.50 | 114.28 | 117.60 | -3.32 |
| 2-Butyrylthiophene                                | 144.60 | 44.41  | 41.10  | 3.31  |
| exo-Dicyclopentadiene                             | 136.40 | 42.16  | 38.85  | 3.31  |
| Dibutyl maleate                                   | 229.20 | 60.99  | 64.30  | -3.31 |
| 1-Fluorododecane                                  | 216.80 | 57.59  | 60.90  | -3.31 |
| 2-Ethyl-m-xylene                                  | 148.00 | 45.34  | 42.03  | 3.31  |
| 1-(3-Cyanopropyl)-3-methylimidazolium dicyanamide | 214.50 | 56.96  | 60.27  | -3.31 |
| 2-Chlorobenzoxazole                               | 118.80 | 37.33  | 34.02  | 3.31  |
| Tetradecylbenzene                                 | 316.30 | 91.50  | 88.19  | 3.31  |
| 3,3-Diethoxy-1-propene                            | 141.50 | 36.94  | 40.25  | -3.31 |
| Diethyl-butylthio-thiophosphinate                 | 203.80 | 60.64  | 57.33  | 3.31  |
| 3,3,4,4-Tetramethyl-1,2-dioxetane                 | 120.20 | 31.10  | 34.40  | -3.30 |
| Diethyl chlorophosphate                           | 138.10 | 36.01  | 39.31  | -3.30 |
| 1,10-Decanedithiol                                | 215.40 | 63.82  | 60.52  | 3.30  |

|                                               |        |        |        |       |
|-----------------------------------------------|--------|--------|--------|-------|
| Trimyristin                                   | 796.50 | 216.60 | 219.90 | -3.30 |
| 1,11-Undecanedithiol                          | 232.10 | 68.40  | 65.10  | 3.30  |
| N-Isopropylaniline                            | 144.60 | 44.40  | 41.10  | 3.30  |
| Butyl N,N-diethylamino phosphorusoxy fluoride | 186.00 | 49.15  | 52.45  | -3.30 |
| 3,3-Diethoxy-1-propyne                        | 137.40 | 35.82  | 39.12  | -3.30 |
| Propane-1,2-dinitrite                         | 111.00 | 28.58  | 31.88  | -3.30 |
| Heptyl butyrate                               | 207.10 | 54.94  | 58.24  | -3.30 |
| 3-Methyl-1,5-dibromopentane                   | 147.20 | 45.11  | 41.81  | 3.30  |
| 2-Chlorothiophene                             | 89.60  | 29.31  | 26.01  | 3.30  |
| 2,2-Bis(butylthio)-1-propanol                 | 240.00 | 70.56  | 67.26  | 3.30  |
| 4-Pentylphenol                                | 174.60 | 52.62  | 49.33  | 3.29  |
| cis-1,2-Dibromoethylene                       | 76.20  | 25.63  | 22.34  | 3.29  |
| 5-Amino-1-pentanol                            | 115.70 | 29.88  | 33.17  | -3.29 |
| Benzedrine                                    | 143.30 | 44.03  | 40.74  | 3.29  |
| Ethyl dodecanoate                             | 256.90 | 68.61  | 71.90  | -3.29 |
| 7-Phenyltridecane                             | 299.20 | 86.79  | 83.50  | 3.29  |
| 1-Bromo-4-fluorobenzene                       | 106.70 | 33.99  | 30.70  | 3.29  |
| Pentyl heptanoate                             | 223.90 | 59.56  | 62.85  | -3.29 |
| 2-(2-(Diethylamino)ethoxy)ethanol             | 173.80 | 45.82  | 49.11  | -3.29 |
| Ethyl thiophosphoryl dichloride               | 120.90 | 37.88  | 34.60  | 3.28  |
| Diethyl ethoxycarbonylmethyl phosphorus oxide | 186.80 | 49.39  | 52.67  | -3.28 |
| Di-n-propylmaleate                            | 195.80 | 51.86  | 55.14  | -3.28 |
| Diethyl maleate                               | 162.40 | 42.70  | 45.98  | -3.28 |
| Propoxydichloromethylsulfenyl chloride        | 148.30 | 45.39  | 42.11  | 3.28  |
| 3-Octanol                                     | 153.90 | 40.37  | 43.65  | -3.28 |
| Octyl butanoate                               | 223.90 | 59.57  | 62.85  | -3.28 |
| Heptylphosphinic dichloride                   | 178.20 | 53.59  | 50.31  | 3.28  |
| 3-Butynylbenzene                              | 138.90 | 42.81  | 39.53  | 3.28  |
| Ethyl 4-chloroacetoacetate                    | 139.60 | 36.45  | 39.73  | -3.28 |
| 2-Methylheptanoic acid                        | 154.80 | 40.62  | 43.89  | -3.27 |
| 3-t-Butylthiophene                            | 140.30 | 43.19  | 39.92  | 3.27  |
| 2-Ethylhexanoic acid                          | 155.30 | 40.76  | 44.03  | -3.27 |
| 1-Phenyldodecane                              | 282.60 | 82.22  | 78.95  | 3.27  |
| 2-Nitro-1-butanol                             | 107.50 | 27.65  | 30.92  | -3.27 |
| Propargyl acetate                             | 97.10  | 24.80  | 28.07  | -3.27 |
| Tetranitromethane                             | 121.30 | 31.44  | 34.71  | -3.27 |
| 2,4-Dimethylpentanoic acid                    | 137.70 | 35.94  | 39.20  | -3.26 |
| 3-(1-Methyl-2-pyrrolidiny)pyridine            | 163.30 | 49.49  | 46.23  | 3.26  |
| Prehnitene                                    | 147.30 | 45.10  | 41.84  | 3.26  |
| 4-Methyl-1,3-dioxane                          | 102.40 | 26.26  | 29.52  | -3.26 |
| 2,3-Xylidine                                  | 128.50 | 39.94  | 36.68  | 3.26  |
| 1-Bromo-2-fluorobenzene                       | 106.70 | 33.96  | 30.70  | 3.26  |
| 3-Methyl-2-pentanol                           | 119.70 | 31.01  | 34.27  | -3.26 |
| 2,5-Dimethylacetophenone                      | 150.20 | 45.89  | 42.63  | 3.26  |
| 3-Pentanol                                    | 103.80 | 26.65  | 29.91  | -3.26 |
| s-Butylmethylether                            | 104.20 | 26.76  | 30.02  | -3.26 |
| 4-tert-Butyltoluene                           | 164.90 | 49.92  | 46.67  | 3.25  |



|                                                      |        |       |       |       |
|------------------------------------------------------|--------|-------|-------|-------|
| 1,8-Octanedithiol                                    | 182.00 | 54.61 | 51.36 | 3.25  |
| 2-Indanone                                           | 123.60 | 38.59 | 35.34 | 3.25  |
| 2-Ethylhexyl acetate                                 | 189.10 | 50.05 | 53.30 | -3.25 |
| Hexyleneglycol                                       | 126.60 | 32.91 | 36.16 | -3.25 |
| 1,8-Dibromooctane                                    | 181.80 | 54.55 | 51.30 | 3.25  |
| 2,3-Pentanedione                                     | 99.40  | 25.45 | 28.70 | -3.25 |
| 4-Allyl anisole                                      | 153.00 | 46.65 | 43.40 | 3.25  |
| Tridecylbenzene                                      | 299.60 | 86.86 | 83.61 | 3.25  |
| Dimethyl disulfide                                   | 82.60  | 27.34 | 24.09 | 3.25  |
| Pentanedinitrile                                     | 97.50  | 24.93 | 28.18 | -3.25 |
| 2-Propyltoluene                                      | 148.30 | 45.36 | 42.11 | 3.25  |
| 5-Methyl-1-hexanol                                   | 136.80 | 35.71 | 38.96 | -3.25 |
| 1,4-Bis(propanoyloxy)-2-butyne                       | 189.30 | 50.11 | 53.36 | -3.25 |
| gamma-Butyrolactone                                  | 79.30  | 19.94 | 23.19 | -3.25 |
| O-Ethyl bromofluorothiophosphate                     | 115.10 | 36.25 | 33.01 | 3.24  |
| Methyl 4-chlorobutyrate                              | 121.00 | 31.38 | 34.62 | -3.24 |
| Chloro di(sec-butoxy)borine                          | 191.40 | 50.69 | 53.93 | -3.24 |
| 4-Methylbenzaldehyde                                 | 118.90 | 37.29 | 34.05 | 3.24  |
| m-Toluidine                                          | 112.20 | 35.45 | 32.21 | 3.24  |
| 2-Chloro-1,3,2-benzodioxaphosphole                   | 125.70 | 39.15 | 35.91 | 3.24  |
| 2,3-Dihydrobenzofuran                                | 114.80 | 36.16 | 32.92 | 3.24  |
| Methoxydichloromethylsulfenyl chloride               | 114.70 | 36.13 | 32.90 | 3.23  |
| 4-Ethylnitrobenzene                                  | 138.80 | 42.74 | 39.51 | 3.23  |
| 2-(1-Vinyloxyethyl)-thiophene                        | 145.00 | 44.44 | 41.21 | 3.23  |
| 3,5-Dimethyl-4-heptanol                              | 168.50 | 44.42 | 47.65 | -3.23 |
| Butylnitrate                                         | 109.80 | 28.32 | 31.55 | -3.23 |
| Butoxy chloro phenylborine                           | 189.20 | 56.56 | 53.33 | 3.23  |
| Diethyl allylmalonate                                | 193.50 | 51.28 | 54.51 | -3.23 |
| Urea                                                 | 53.90  | 12.99 | 16.22 | -3.23 |
| Ethyl 2-acetylpentanoate                             | 172.90 | 45.63 | 48.86 | -3.23 |
| 2-Ethyl-4-oxo-1-heptanol                             | 171.00 | 45.11 | 48.34 | -3.23 |
| 1,5(H)-Diazabicyclo[4.3.0]non-5-enium<br>imidazolate | 182.50 | 54.72 | 51.49 | 3.23  |
| 2-Methyl-1,5-dibromopentane                          | 147.50 | 45.12 | 41.89 | 3.23  |
| Methylisocyanate                                     | 54.00  | 13.02 | 16.25 | -3.23 |
| 3-Isopropyltoluene                                   | 148.20 | 45.31 | 42.08 | 3.23  |
| 3-t-Butyltoluene                                     | 164.90 | 49.89 | 46.67 | 3.22  |
| 1-Methyl-3-hexylimidazolium threoninate              | 289.90 | 77.73 | 80.95 | -3.22 |
| 2-t-Butyl-4-methylphenol                             | 172.50 | 51.97 | 48.75 | 3.22  |
| 4-Amino-1-butanol                                    | 99.00  | 25.37 | 28.59 | -3.22 |
| Dipropyl butylphosphonate                            | 223.10 | 59.41 | 62.63 | -3.22 |
| Ethanol                                              | 53.60  | 12.92 | 16.14 | -3.22 |
| MTBE                                                 | 103.80 | 26.69 | 29.91 | -3.22 |
| Propyl hexanoate                                     | 173.80 | 45.89 | 49.11 | -3.22 |
| Diazoacetic ester                                    | 111.60 | 28.83 | 32.05 | -3.22 |
| 1-(2-Hydroxy-5-methylphenyl)-1-propanone             | 158.70 | 48.18 | 44.96 | 3.22  |
| Tetrahydro-2H-pyran-2-methanol                       | 119.00 | 30.86 | 34.08 | -3.22 |
| Methyl pentadecanoate                                | 290.50 | 77.90 | 81.12 | -3.22 |
| Freon 113                                            | 101.90 | 26.17 | 29.39 | -3.22 |

|                                               |        |        |        |       |
|-----------------------------------------------|--------|--------|--------|-------|
| Propargyl propionate                          | 113.60 | 29.38  | 32.59  | -3.21 |
| Methyl tetradecanoate                         | 273.60 | 73.27  | 76.48  | -3.21 |
| 2-Phenyloctane                                | 214.80 | 63.56  | 60.35  | 3.21  |
| 4-Methyl-2-crotylphenol                       | 168.10 | 50.75  | 47.54  | 3.21  |
| 2,5-Dimethylbenzoxazole                       | 138.10 | 42.52  | 39.31  | 3.21  |
| Phenyltri(2-octyloxy)silane                   | 529.30 | 149.82 | 146.61 | 3.21  |
| 2,2-Dimethylpentanoic acid                    | 137.70 | 36.00  | 39.20  | -3.20 |
| 3-Chlorotoluene                               | 113.90 | 35.88  | 32.68  | 3.20  |
| Methyl tridecanoate                           | 256.80 | 68.67  | 71.87  | -3.20 |
| Acetonylacetone                               | 115.30 | 29.86  | 33.06  | -3.20 |
| 4-Nonanol                                     | 170.60 | 45.03  | 48.23  | -3.20 |
| Methyltrihexyloxysilane                       | 378.70 | 102.11 | 105.31 | -3.20 |
| 2-Methyl-1-pentanol                           | 120.10 | 31.18  | 34.38  | -3.20 |
| 2-Propionylthiophene                          | 128.00 | 39.74  | 36.54  | 3.20  |
| 2-Hexanol                                     | 120.60 | 31.32  | 34.51  | -3.19 |
| N,N-Bis(2-hydroxyethyl)butylamine             | 173.50 | 45.83  | 49.02  | -3.19 |
| Chloro dineopentoxyborine                     | 226.40 | 60.34  | 63.53  | -3.19 |
| Diethyl O-ethyl phopsphorus oxide             | 150.20 | 39.44  | 42.63  | -3.19 |
| Cyclohexyl formate                            | 129.60 | 33.79  | 36.98  | -3.19 |
| 1,1-Bis(propylthio)ethane                     | 181.90 | 54.52  | 51.33  | 3.19  |
| Methyl but-3-yne- 1-carboxylate               | 113.30 | 29.32  | 32.51  | -3.19 |
| 2,3,3-Trimethyl-2-butanol                     | 135.20 | 35.33  | 38.52  | -3.19 |
| Butyl chloroformate                           | 121.60 | 31.60  | 34.79  | -3.19 |
| Dichloromethylphosphine                       | 78.30  | 26.10  | 22.91  | 3.19  |
| 3-Methylhexanoic acid                         | 137.60 | 35.99  | 39.18  | -3.19 |
| Dimethyl citraconate                          | 144.60 | 37.91  | 41.10  | -3.19 |
| Chloroacetic acid                             | 70.40  | 17.56  | 20.75  | -3.19 |
| 1,2-Dibromoethane                             | 81.60  | 27.00  | 23.82  | 3.18  |
| Methylnitrate                                 | 59.60  | 14.60  | 17.78  | -3.18 |
| Diisopropyl phthalate                         | 231.70 | 68.17  | 64.99  | 3.18  |
| Thionylchloride                               | 63.70  | 22.09  | 18.91  | 3.18  |
| 2,4,6-Tris(ethylamino)-1,3,5-triethylborazine | 310.90 | 89.89  | 86.71  | 3.18  |
| Stearic acid                                  | 323.40 | 86.96  | 90.14  | -3.18 |
| Colamine                                      | 65.60  | 16.25  | 19.43  | -3.18 |
| Cyclopropylbenzene                            | 125.70 | 39.09  | 35.91  | 3.18  |
| Butylisopropylether                           | 137.70 | 36.03  | 39.20  | -3.17 |
| N-Fenchylaminotriethylsilane                  | 288.50 | 83.74  | 80.57  | 3.17  |
| 4-Ethyl-m-xylene                              | 148.50 | 45.34  | 42.17  | 3.17  |
| 2-Propyn-1-butyrate                           | 130.40 | 34.03  | 37.20  | -3.17 |
| 2,4-Dibromopentane                            | 130.90 | 40.51  | 37.34  | 3.17  |
| 2-Methyloctanoic acid                         | 171.30 | 45.25  | 48.42  | -3.17 |
| Decylbenzene                                  | 249.10 | 72.93  | 69.76  | 3.17  |
| Dipropyl pentylphosphonate                    | 239.80 | 64.04  | 67.21  | -3.17 |
| Dimethyldimethoxysilane                       | 121.20 | 31.51  | 34.68  | -3.17 |
| Cyclobutanecarboxylic acid                    | 97.10  | 24.90  | 28.07  | -3.17 |
| 1,2-Ethanedithiol                             | 81.80  | 27.04  | 23.87  | 3.17  |
| Succinonitrile                                | 80.80  | 20.43  | 23.60  | -3.17 |
| 2-Methyl-1-hexanol                            | 136.80 | 35.79  | 38.96  | -3.17 |
| 3-Methyl-2-oxazolidinone                      | 91.70  | 23.42  | 26.59  | -3.17 |

|                                     |        |        |        |       |
|-------------------------------------|--------|--------|--------|-------|
| Trimethylsilylaminotriethylsilane   | 220.20 | 65.00  | 61.83  | 3.17  |
| Chloroacetic acid ethylester        | 104.20 | 26.85  | 30.02  | -3.17 |
| Ethyl-n-propylether                 | 104.60 | 26.96  | 30.13  | -3.17 |
| 1-Phenyl-1,2-propanedione           | 136.50 | 42.04  | 38.88  | 3.16  |
| 3-Acetyldihydro-2(3H)-furanone      | 114.00 | 29.54  | 32.70  | -3.16 |
| 4-Methylbenzenemethanamine          | 127.50 | 39.57  | 36.41  | 3.16  |
| Bis(2-chloroethoxy-2-ethyl) maleate | 276.70 | 74.17  | 77.33  | -3.16 |
| 3-Nonanol                           | 170.60 | 45.07  | 48.23  | -3.16 |
| 1-Butanol                           | 87.00  | 22.14  | 25.30  | -3.16 |
| Dipropyl propylphosphonate          | 206.40 | 54.89  | 58.05  | -3.16 |
| Undecylbenzene                      | 266.10 | 77.58  | 74.42  | 3.16  |
| HMDS                                | 171.20 | 51.55  | 48.39  | 3.16  |
| Formaldehyde                        | 31.10  | 6.81   | 9.97   | -3.16 |
| Pentyl nitrite                      | 119.80 | 31.14  | 34.29  | -3.15 |
| Phenyl vinyl ether                  | 120.10 | 37.53  | 34.38  | 3.15  |
| 2-Heptylthiophene                   | 192.00 | 57.25  | 54.10  | 3.15  |
| 2,5-Xylidine                        | 129.00 | 39.97  | 36.82  | 3.15  |
| Tetradecamethylcycloheptasiloxane   | 460.30 | 130.84 | 127.69 | 3.15  |
| Anabasine                           | 161.60 | 48.91  | 45.76  | 3.15  |
| Ethylthio diethylamino propylborane | 203.20 | 60.32  | 57.17  | 3.15  |
| Dihydro-3-methyl-2(3H)-furanone     | 95.90  | 24.59  | 27.74  | -3.15 |
| 5-Methyl-3-heptanol                 | 152.70 | 40.17  | 43.32  | -3.15 |
| 2-Bromo-1-chloro-3,3-dimethylbutane | 142.10 | 43.56  | 40.41  | 3.15  |
| Tetra(2-ethylbutyl) silicate        | 463.90 | 125.53 | 128.68 | -3.15 |
| Allyl glycidyl ether                | 117.80 | 30.60  | 33.75  | -3.15 |
| p-Cymene                            | 148.60 | 45.34  | 42.19  | 3.15  |
| Isopropyl laurate                   | 272.60 | 73.06  | 76.21  | -3.15 |
| Ethylepoxide                        | 80.50  | 20.37  | 23.52  | -3.15 |
| 2-(Allyloxy)ethanol                 | 107.80 | 27.86  | 31.00  | -3.14 |
| 1-Methyl-1-phenylhydrazine          | 123.60 | 38.48  | 35.34  | 3.14  |
| 2-Pentanol                          | 103.60 | 26.71  | 29.85  | -3.14 |
| 3-(Dimethylamino)butyronitrile      | 124.60 | 32.47  | 35.61  | -3.14 |
| 1-Ethyl-3-methylimidazolium acetate | 170.10 | 44.95  | 48.09  | -3.14 |
| 1,7-Dibromoheptane                  | 165.10 | 49.86  | 46.72  | 3.14  |
| 2-Methyl-3-pentanol                 | 120.00 | 31.21  | 34.35  | -3.14 |
| Diheptyl phosphite                  | 291.20 | 78.17  | 81.31  | -3.14 |
| Cyanogen                            | 47.40  | 11.30  | 14.44  | -3.14 |
| 1-Fluoro-4-(trifluoromethyl)benzene | 119.00 | 30.94  | 34.08  | -3.14 |
| 2-Propylpentanoic acid              | 154.90 | 40.79  | 43.92  | -3.13 |
| Ethylnitrate                        | 76.40  | 19.26  | 22.39  | -3.13 |
| 1,2,2-Trimethylpropylacetate        | 155.10 | 40.85  | 43.98  | -3.13 |
| 1,5-Pentanedithiol                  | 131.90 | 40.74  | 37.61  | 3.13  |
| 1,1,1-Trichlorotrifluoroethane      | 101.90 | 26.26  | 29.39  | -3.13 |
| Phenylacetyl chloride               | 133.00 | 41.04  | 37.92  | 3.12  |
| Bromoacetyl bromide                 | 84.00  | 27.60  | 24.48  | 3.12  |
| Decyl decanoate                     | 357.50 | 96.37  | 99.49  | -3.12 |
| Heptylbenzene                       | 199.00 | 59.14  | 56.02  | 3.12  |
| 6-Methyl-2-heptanol                 | 153.50 | 40.42  | 43.54  | -3.12 |
| Apiole                              | 203.10 | 60.26  | 57.14  | 3.12  |

|                                             |        |        |        |       |
|---------------------------------------------|--------|--------|--------|-------|
| Methyl chlorooxoacetate                     | 90.80  | 23.23  | 26.34  | -3.11 |
| Diethyl bis(2,2-diethylhydrazino)silane     | 279.40 | 81.18  | 78.07  | 3.11  |
| 4-Decanol                                   | 187.30 | 49.70  | 52.81  | -3.11 |
| Nitromethane                                | 51.60  | 12.48  | 15.59  | -3.11 |
| Dioctyl phosphite                           | 324.60 | 87.36  | 90.47  | -3.11 |
| Methylchloroacetate                         | 87.40  | 22.30  | 25.41  | -3.11 |
| 1-Propanol                                  | 70.30  | 17.61  | 20.72  | -3.11 |
| Dibutyl octadecanephosphonate               | 490.30 | 132.81 | 135.92 | -3.11 |
| 1,6-Hexanedithiol                           | 148.60 | 45.30  | 42.19  | 3.11  |
| 1,3-Dithiolane                              | 88.30  | 28.76  | 25.65  | 3.11  |
| Butane-2,3-dinitrite                        | 127.20 | 33.22  | 36.32  | -3.10 |
| Methyl cyclobutanecarboxylate               | 114.40 | 29.71  | 32.81  | -3.10 |
| cis-Nerolidol                               | 250.40 | 73.22  | 70.12  | 3.10  |
| Ethyl bis(2,2-diethylhydrazino)chlorosilane | 259.70 | 75.77  | 72.67  | 3.10  |
| s-Butylnitrate                              | 109.00 | 28.23  | 31.33  | -3.10 |
| o-Toluidine                                 | 112.30 | 35.34  | 32.24  | 3.10  |
| 3,4-Dimethylthiophene                       | 108.80 | 34.38  | 31.28  | 3.10  |
| Chloroethylene carbonate                    | 86.50  | 22.06  | 25.16  | -3.10 |
| 1,2-Diethylbenzene                          | 148.00 | 45.13  | 42.03  | 3.10  |
| 4-Heptanol                                  | 137.20 | 35.97  | 39.07  | -3.10 |
| 1,4-Butanedithiol                           | 115.20 | 36.13  | 33.03  | 3.10  |
| Nitroethane                                 | 68.40  | 17.10  | 20.20  | -3.10 |
| Bis(2-chloroethoxy-2-ethyl) fumarate        | 278.10 | 74.62  | 77.71  | -3.09 |
| Cyclohexyl benzoate                         | 200.60 | 59.55  | 56.46  | 3.09  |
| N-Butyl-N-phenylacetamide                   | 195.50 | 58.15  | 55.06  | 3.09  |
| Cyclopentyl formate                         | 113.70 | 29.53  | 32.62  | -3.09 |
| Nitric acid                                 | 42.60  | 10.03  | 13.12  | -3.09 |
| Isopropanolamine                            | 82.30  | 20.92  | 24.01  | -3.09 |
| s-Butyl-t-butylether                        | 153.10 | 40.34  | 43.43  | -3.09 |
| 1-Nitrobutane                               | 101.80 | 26.27  | 29.36  | -3.09 |
| 4-Hydroxy-4-methyl-2-pentanone              | 120.50 | 31.40  | 34.49  | -3.09 |
| (Bromomethyl)chlorodimethylsilane           | 120.50 | 37.57  | 34.49  | 3.08  |
| N-Methylhydroxylamine                       | 49.10  | 11.82  | 14.90  | -3.08 |
| 2-Propyn-1-valerate                         | 147.10 | 38.70  | 41.78  | -3.08 |
| Hexyl octanoate                             | 257.20 | 68.90  | 71.98  | -3.08 |
| 1,5-Dibromopentane                          | 131.70 | 40.64  | 37.56  | 3.08  |
| 2-Bromo-1,3-butadiene                       | 85.40  | 27.94  | 24.86  | 3.08  |
| 1,2,4-Trimethylbenzene                      | 131.90 | 40.69  | 37.61  | 3.08  |
| 4-Vinylpyridine                             | 106.20 | 33.64  | 30.56  | 3.08  |
| 3-Methyl-3-pentanol                         | 119.40 | 31.11  | 34.19  | -3.08 |
| 3-Methyl-2-butanol                          | 103.10 | 26.64  | 29.71  | -3.07 |
| 2-Methyl-2-propanol                         | 86.80  | 22.17  | 25.24  | -3.07 |
| 1,2-Dichloro-1,1-difluoroethane             | 83.00  | 21.13  | 24.20  | -3.07 |
| 1,2-Dichloro-1,2-difluoroethane             | 83.00  | 21.13  | 24.20  | -3.07 |
| 3-Chlorobenzeneacetonitrile                 | 131.30 | 40.52  | 37.45  | 3.07  |
| 3-Nitro-2-butanol                           | 107.90 | 27.96  | 31.03  | -3.07 |
| 2,3-Butandione                              | 82.70  | 21.05  | 24.12  | -3.07 |
| Cedrene                                     | 218.70 | 64.49  | 61.42  | 3.07  |
| 2-Nitropropane                              | 84.70  | 21.60  | 24.67  | -3.07 |

|                                           |        |       |       |       |
|-------------------------------------------|--------|-------|-------|-------|
| 2,5-Dimethyltetrahydrofuran               | 110.80 | 28.76 | 31.83 | -3.07 |
| Methyl-n-pentylether                      | 121.30 | 31.64 | 34.71 | -3.07 |
| 2-Methylnonanoic acid                     | 187.80 | 49.88 | 52.95 | -3.07 |
| 2-Propyl-2-hydroxy-1,4-dioxane            | 143.10 | 37.62 | 40.69 | -3.07 |
| 4-Methoxy-2-methylaniline                 | 136.50 | 41.94 | 38.88 | 3.06  |
| Neopentylbenzene                          | 165.20 | 49.81 | 46.75 | 3.06  |
| Iodoacetonitrile                          | 70.70  | 23.89 | 20.83 | 3.06  |
| Dipropyl hexylphosphonate                 | 256.40 | 68.70 | 71.76 | -3.06 |
| Isopentylbenzene                          | 165.10 | 49.78 | 46.72 | 3.06  |
| Methyltriisopentyloxysilane               | 327.70 | 88.26 | 91.32 | -3.06 |
| 2-Methyl-1,4-dibromobutane                | 130.80 | 40.37 | 37.31 | 3.06  |
| 1-(4-Methylphenyl)ethanol                 | 140.90 | 43.14 | 40.08 | 3.06  |
| 1-Butyl-1-methylpyrrolidinium dicyanamide | 225.10 | 60.12 | 63.18 | -3.06 |
| 1-Propyl-3-methylimidazolium acetate      | 185.90 | 49.37 | 52.43 | -3.06 |
| 2-Methoxystyrene                          | 136.10 | 41.82 | 38.77 | 3.05  |
| Acetaldehyde                              | 47.90  | 11.52 | 14.57 | -3.05 |
| Methylisopropylphosphinic chloride        | 114.80 | 29.87 | 32.92 | -3.05 |
| Undecanonitrile                           | 196.50 | 52.28 | 55.33 | -3.05 |
| 1-Bromo-5,5-dichlorohexane                | 157.80 | 47.77 | 44.72 | 3.05  |
| Octylbenzene                              | 215.70 | 63.65 | 60.60 | 3.05  |
| 1,1-Diethoxyethylene                      | 125.00 | 32.67 | 35.72 | -3.05 |
| 1,6-Dibromohexane                         | 148.40 | 45.19 | 42.14 | 3.05  |
| Paracetamol                               | 137.80 | 42.28 | 39.23 | 3.05  |
| Cyclohexylphosphine                       | 122.60 | 38.11 | 35.06 | 3.05  |
| Diallyldimethylsilane                     | 159.90 | 48.34 | 45.29 | 3.05  |
| 3-Ethyltoluene                            | 131.90 | 40.66 | 37.61 | 3.05  |
| 3-Methyl-2-heptanol                       | 152.80 | 40.30 | 43.35 | -3.05 |
| 2-Ethylnonanoic acid                      | 204.60 | 54.51 | 57.55 | -3.04 |
| 2-Propyloctanoic acid                     | 204.60 | 54.51 | 57.55 | -3.04 |
| alpha-Methyl benzylamine                  | 127.50 | 39.45 | 36.41 | 3.04  |
| Ethyl but-3-yne- 1-carboxylate            | 130.00 | 34.05 | 37.09 | -3.04 |
| Ethyl 2-cyclopentanone-1-carboxylate      | 148.30 | 39.07 | 42.11 | -3.04 |
| alpha-Chloroacetoacetic acid ethylester   | 139.00 | 36.52 | 39.56 | -3.04 |
| 1,1-Dibromoethane                         | 81.50  | 26.83 | 23.79 | 3.04  |
| Isopropyl myristate                       | 305.90 | 82.30 | 85.34 | -3.04 |
| Ethyl 3-chloropropionate                  | 120.80 | 31.53 | 34.57 | -3.04 |
| Pyruvaldehyde                             | 66.80  | 16.72 | 19.76 | -3.04 |
| Dipropyl fumarate                         | 197.10 | 52.46 | 55.50 | -3.04 |
| 2-Hydroxyacetophenone                     | 125.30 | 38.84 | 35.80 | 3.04  |
| s-Butyl ethyl ether                       | 120.90 | 31.56 | 34.60 | -3.04 |
| Formothion                                | 204.60 | 60.59 | 57.55 | 3.04  |
| 2-Pentylthiophene                         | 158.70 | 48.00 | 44.96 | 3.04  |
| 1-Nitropropane                            | 84.80  | 21.66 | 24.69 | -3.03 |
| gamma-Valerolactone                       | 95.70  | 24.65 | 27.68 | -3.03 |
| 1,1-Dichloro-1,3-butadiene                | 95.60  | 30.69 | 27.66 | 3.03  |
| 1-Fluorotetradecane                       | 250.20 | 67.03 | 70.06 | -3.03 |
| 2-Methylaminoethanol                      | 82.60  | 21.06 | 24.09 | -3.03 |
| 1-Pentanol                                | 103.60 | 26.82 | 29.85 | -3.03 |
| 5-Amino-2-butoxypyridine                  | 166.30 | 50.08 | 47.05 | 3.03  |

|                                                |        |        |        |       |
|------------------------------------------------|--------|--------|--------|-------|
| 2,4-Dimethylhexanoic acid                      | 153.80 | 40.59  | 43.62  | -3.03 |
| 2-Hexylthiophene                               | 175.60 | 52.63  | 49.60  | 3.03  |
| 1,4-Butanediol dimethacrylate                  | 224.60 | 60.01  | 63.04  | -3.03 |
| Tetradecamethylhexasiloxane                    | 433.80 | 123.45 | 120.42 | 3.03  |
| 1,2-Epoxy-4-(epoxyethyl)cyclohexane            | 137.90 | 36.23  | 39.26  | -3.03 |
| Ethyl ether                                    | 87.80  | 22.49  | 25.52  | -3.03 |
| Propane-1,3-dithiol                            | 98.50  | 31.48  | 28.45  | 3.03  |
| Acetonitrile                                   | 46.20  | 11.08  | 14.11  | -3.03 |
| 2-Methylpentanedinitrile                       | 113.90 | 29.65  | 32.68  | -3.03 |
| Phenyl di(sec-octoxy)borine                    | 379.50 | 108.55 | 105.53 | 3.02  |
| 2-Propyn-1-hexanoate                           | 163.80 | 43.34  | 46.36  | -3.02 |
| 2-Isopropyltoluene                             | 148.10 | 45.08  | 42.06  | 3.02  |
| Cyclopropyl methyl ether                       | 81.00  | 20.63  | 23.65  | -3.02 |
| 3-Methylbenzaldehyde                           | 118.90 | 37.07  | 34.05  | 3.02  |
| Chloromethylacetate                            | 87.70  | 22.47  | 25.49  | -3.02 |
| 2-Methyl-1-butanol                             | 103.30 | 26.75  | 29.77  | -3.02 |
| Caprolactone                                   | 111.90 | 29.11  | 32.13  | -3.02 |
| Octadecamethyloctasiloxane                     | 567.80 | 160.19 | 157.17 | 3.02  |
| Chloro 2-octoxy phenylborine                   | 255.10 | 74.42  | 71.41  | 3.01  |
| 1-Decyl hydroperoxide                          | 197.20 | 52.51  | 55.52  | -3.01 |
| Butyl 2-methylbutyrate                         | 172.80 | 45.82  | 48.83  | -3.01 |
| Acetylcyanide                                  | 65.10  | 16.28  | 19.29  | -3.01 |
| (Methoxymethyl)oxirane                         | 90.00  | 23.11  | 26.12  | -3.01 |
| Dioctyl butoxyborine                           | 370.40 | 100.02 | 103.03 | -3.01 |
| 3-Hexyne-2,5-diol                              | 119.60 | 31.23  | 34.24  | -3.01 |
| 2-Fluorobenzotrifluoride                       | 118.90 | 31.04  | 34.05  | -3.01 |
| 3-Heptanone                                    | 130.60 | 34.25  | 37.26  | -3.01 |
| Isopentyl alcohol                              | 103.00 | 26.68  | 29.69  | -3.01 |
| Isopropyl pentanoate                           | 156.30 | 41.30  | 44.31  | -3.01 |
| 3-Methyl-2-hexanol                             | 136.10 | 35.76  | 38.77  | -3.01 |
| Chlorotriethoxysilane                          | 176.20 | 46.76  | 49.76  | -3.00 |
| Cyclopentanepropanoic acid                     | 145.50 | 38.34  | 41.34  | -3.00 |
| 4-Chlorotoluene                                | 113.90 | 35.68  | 32.68  | 3.00  |
| trans-2,3-Epoxybutane                          | 80.60  | 20.54  | 23.54  | -3.00 |
| 3,4-Hexanedione                                | 116.00 | 30.25  | 33.25  | -3.00 |
| Glycerol 1-oleate                              | 385.50 | 104.17 | 107.17 | -3.00 |
| Hydrogen cyanide                               | 29.30  | 6.47   | 9.47   | -3.00 |
| Propyl N,N-diethylamino phosphorusoxy fluoride | 169.30 | 44.87  | 47.87  | -3.00 |
| Heptanonitrile                                 | 129.70 | 34.01  | 37.01  | -3.00 |
| Methyl t-pentyl ether                          | 120.00 | 31.35  | 34.35  | -3.00 |
| Propanolamine                                  | 82.30  | 21.01  | 24.01  | -3.00 |
| 5-Nonanol                                      | 170.60 | 45.23  | 48.23  | -3.00 |
| 1-(4-Methylphenyl)-1-propanone                 | 151.40 | 45.96  | 42.96  | 3.00  |
| 2,4-Dimethylacetophenone                       | 149.80 | 45.52  | 42.52  | 3.00  |
| Cyclohexanecarboxylic acid                     | 127.90 | 33.52  | 36.52  | -3.00 |
| n-Butylethylether                              | 121.30 | 31.71  | 34.71  | -3.00 |
| 5-(Chloromethyl)-1,3-benzodioxole              | 138.50 | 42.42  | 39.42  | 3.00  |
| 4-Methylacetophenone                           | 135.00 | 41.46  | 38.46  | 3.00  |

|                                                   |        |        |        |       |
|---------------------------------------------------|--------|--------|--------|-------|
| 2-Octynoic acid                                   | 146.70 | 38.68  | 41.67  | -2.99 |
| Dipropyl heptylphosphonate                        | 273.10 | 73.35  | 76.34  | -2.99 |
| Ethyl 2-acetylhexanoate                           | 189.90 | 50.53  | 53.52  | -2.99 |
| Water                                             | 19.20  | 3.71   | 6.70   | -2.99 |
| 2,6-Dimethyl-2-heptanol                           | 169.70 | 44.99  | 47.98  | -2.99 |
| Vinyltriethoxysilane                              | 190.70 | 50.75  | 53.74  | -2.99 |
| n-Nonylformate                                    | 191.10 | 50.86  | 53.85  | -2.99 |
| Dihydro-4-methyl-2(3H)-furanone                   | 95.50  | 24.64  | 27.63  | -2.99 |
| 2-Decanol                                         | 187.30 | 49.82  | 52.81  | -2.99 |
| 4-Octanol                                         | 153.90 | 40.66  | 43.65  | -2.99 |
| 2-Propanol                                        | 70.30  | 17.73  | 20.72  | -2.99 |
| 2-Heptanol                                        | 137.20 | 36.08  | 39.07  | -2.99 |
| cis-2,3-Epoxybutane                               | 79.70  | 20.31  | 23.30  | -2.99 |
| Isopropyl N,N-diethylamino phosphorusoxy fluoride | 169.60 | 44.97  | 47.95  | -2.98 |
| Ethyl 4-chlorobutyrate                            | 137.80 | 36.25  | 39.23  | -2.98 |
| 2-Butanol                                         | 86.50  | 22.18  | 25.16  | -2.98 |
| Dodecyloxirane                                    | 247.50 | 66.34  | 69.32  | -2.98 |
| 1-Vinyl-4-fluorobenzene                           | 115.30 | 36.04  | 33.06  | 2.98  |
| 1,2,4,5-Tetramethylbenzene                        | 149.50 | 45.42  | 42.44  | 2.98  |
| Margaric acid                                     | 306.70 | 82.58  | 85.56  | -2.98 |
| 5-Methyl-2-hexanol                                | 136.80 | 35.98  | 38.96  | -2.98 |
| Propanamide                                       | 75.40  | 19.14  | 22.12  | -2.98 |
| Diethyl N,N-diethylamino phosphate                | 198.70 | 52.96  | 55.94  | -2.98 |
| 3-Chloro-1-butanol                                | 101.10 | 26.19  | 29.17  | -2.98 |
| 3,3-Dimethylpentanoic acid                        | 136.90 | 36.01  | 38.99  | -2.98 |
| 1-Methyl-3-phenylpropylamine                      | 160.60 | 48.46  | 45.49  | 2.97  |
| 2-Propyn-1-heptanoate                             | 180.50 | 47.97  | 50.94  | -2.97 |
| Chloro dioctoxyborine                             | 327.50 | 88.29  | 91.26  | -2.97 |
| s-Butylbenzene                                    | 148.10 | 45.03  | 42.06  | 2.97  |
| Nitroisobutane                                    | 101.60 | 26.33  | 29.30  | -2.97 |
| 2-Methyl-1-propanol                               | 86.50  | 22.19  | 25.16  | -2.97 |
| Sebaconitrile                                     | 181.00 | 48.11  | 51.08  | -2.97 |
| 6-Methyl-3-heptanol                               | 153.40 | 40.54  | 43.51  | -2.97 |
| Dipropyl octylphosphonate                         | 289.90 | 77.98  | 80.95  | -2.97 |
| 3-Decanol                                         | 187.30 | 49.84  | 52.81  | -2.97 |
| n-Propylchloroacetate                             | 121.20 | 31.71  | 34.68  | -2.97 |
| 2-Ethyl-1-butanol                                 | 119.30 | 31.19  | 34.16  | -2.97 |
| Pivalaldehyde                                     | 97.20  | 25.13  | 28.10  | -2.97 |
| Isopropyl methyl ether                            | 87.50  | 22.47  | 25.44  | -2.97 |
| Ethyl nitrite                                     | 69.70  | 17.59  | 20.55  | -2.96 |
| 2-Ethyl-1-hexanol                                 | 153.00 | 40.44  | 43.40  | -2.96 |
| 4-Methyl-4-heptanol                               | 153.00 | 40.44  | 43.40  | -2.96 |
| Benzo[c]isoxazole                                 | 105.60 | 33.36  | 30.40  | 2.96  |
| 2-Methyl-2-butanol                                | 102.90 | 26.70  | 29.66  | -2.96 |
| 1,3,4,4-Tetrachloro-1-butene                      | 128.90 | 39.75  | 36.79  | 2.96  |
| Butyldi(3-aminopropyl)phosphine                   | 223.70 | 65.75  | 62.79  | 2.96  |
| Isoamylisonitrile                                 | 113.50 | 29.61  | 32.57  | -2.96 |
| Methyltriheptyloxysilane                          | 428.50 | 116.01 | 118.97 | -2.96 |

|                                         |        |       |       |       |
|-----------------------------------------|--------|-------|-------|-------|
| Diphenyl fluorophosphate                | 203.80 | 60.29 | 57.33 | 2.96  |
| 1-Heptanol                              | 137.30 | 36.14 | 39.09 | -2.95 |
| Ethyl amyl ether                        | 138.10 | 36.36 | 39.31 | -2.95 |
| 1,9-Nonanedithiol                       | 198.70 | 58.89 | 55.94 | 2.95  |
| 2-Ethylheptanoic acid                   | 170.50 | 45.25 | 48.20 | -2.95 |
| 2-Methyl-3-heptanol                     | 153.40 | 40.56 | 43.51 | -2.95 |
| trans-2-Butene-1,4-diol                 | 90.10  | 23.20 | 26.15 | -2.95 |
| Cyclopentylacetic acid                  | 129.00 | 33.87 | 36.82 | -2.95 |
| 1-Nonanol                               | 170.70 | 45.31 | 48.26 | -2.95 |
| 2,4-Dimethylnitrobenzene                | 138.10 | 42.26 | 39.31 | 2.95  |
| Cyclopentanecarboxylic acid             | 112.40 | 29.32 | 32.27 | -2.95 |
| 4-Ethyltoluene                          | 132.60 | 40.75 | 37.81 | 2.94  |
| Chlorobenzene                           | 97.60  | 31.15 | 28.21 | 2.94  |
| 2-Nonynoic acid                         | 163.40 | 43.31 | 46.25 | -2.94 |
| 2,2-Dimethyl-1-butanol                  | 119.50 | 31.27 | 34.21 | -2.94 |
| 3-Hexanol                               | 119.90 | 31.38 | 34.32 | -2.94 |
| n-Propylnitrate                         | 93.10  | 24.03 | 26.97 | -2.94 |
| Triethylmethanol                        | 135.50 | 35.66 | 38.60 | -2.94 |
| 2-Hydroxybenzaldehyde                   | 109.90 | 34.52 | 31.58 | 2.94  |
| 3,3-Dimethylbutanoic acid               | 120.40 | 31.52 | 34.46 | -2.94 |
| 4-t-Butyl-2-methylphenol                | 173.60 | 51.99 | 49.05 | 2.94  |
| n-Butylnonanoate                        | 240.60 | 64.49 | 67.43 | -2.94 |
| 1,3,5-Trimethylbenzene                  | 133.50 | 40.99 | 38.05 | 2.94  |
| 2,3-Dimethylheptanoic acid              | 170.30 | 45.21 | 48.15 | -2.94 |
| 4-Benzylpiperidine                      | 183.20 | 54.62 | 51.68 | 2.94  |
| 2,3-Dimethylpentanoic acid              | 136.50 | 35.94 | 38.88 | -2.94 |
| 2-Methyldecanoic acid                   | 204.20 | 54.51 | 57.44 | -2.93 |
| Hydroxycitronellal                      | 188.30 | 50.15 | 53.08 | -2.93 |
| 2,3-Heptanedione                        | 132.80 | 34.93 | 37.86 | -2.93 |
| 2-(Butylamino)ethanol                   | 132.80 | 34.93 | 37.86 | -2.93 |
| Isobutyl 2-chloropropionate             | 154.20 | 40.80 | 43.73 | -2.93 |
| Pimelonitrile                           | 130.90 | 34.41 | 37.34 | -2.93 |
| Propanenitrile                          | 62.90  | 15.76 | 18.69 | -2.93 |
| Isopropyl (2,4-dichlorophenoxy)acetate  | 215.90 | 63.58 | 60.65 | 2.93  |
| 2,5-Dimethylthiophene                   | 108.90 | 34.23 | 31.31 | 2.92  |
| 2,6-Diisopropylphenol                   | 189.00 | 56.20 | 53.28 | 2.92  |
| Ethylene glycol dimethacrylate          | 191.00 | 50.90 | 53.82 | -2.92 |
| Ethyl pentanoate                        | 140.10 | 36.94 | 39.86 | -2.92 |
| Dimethyldiisopropoxysilane              | 186.00 | 49.53 | 52.45 | -2.92 |
| alpha-Phenylacetoacetic acid ethylester | 193.90 | 57.54 | 54.62 | 2.92  |
| Methyl 3-butenate                       | 101.30 | 26.30 | 29.22 | -2.92 |
| 2-(Propylamino)ethanol                  | 116.10 | 30.36 | 33.28 | -2.92 |
| 2-t-Butylthiophene                      | 140.20 | 42.81 | 39.89 | 2.92  |
| 2,2-Dimethyloctanoic acid               | 187.30 | 49.89 | 52.81 | -2.92 |
| 2-Propyl-6-methyl-2-hydroxy-1,4-dioxane | 159.70 | 42.32 | 45.24 | -2.92 |
| Hemimellitene                           | 131.60 | 40.45 | 37.53 | 2.92  |
| 4-Methyl-2-pentanol                     | 119.70 | 31.35 | 34.27 | -2.92 |
| 2-Nitrobutane                           | 100.70 | 26.14 | 29.06 | -2.92 |
| n-Butyl methyl ether                    | 104.60 | 27.21 | 30.13 | -2.92 |



|                                          |        |        |        |       |
|------------------------------------------|--------|--------|--------|-------|
| 1,1,3,3-Tetramethylguanidinium octanoate | 276.50 | 74.36  | 77.28  | -2.92 |
| 2-Butanone                               | 81.30  | 20.82  | 23.73  | -2.91 |
| Propyl nitrite                           | 86.40  | 22.22  | 25.13  | -2.91 |
| cis-2-Methyl-1,3-pentadiene              | 96.00  | 30.68  | 27.77  | 2.91  |
| 1-Octanol                                | 153.70 | 40.68  | 43.59  | -2.91 |
| Cyclopentyl acetate                      | 129.60 | 34.07  | 36.98  | -2.91 |
| Ethyl 2-acetyl-3-methylbutanoate         | 172.00 | 45.70  | 48.61  | -2.91 |
| n-Butylchloroacetate                     | 137.80 | 36.32  | 39.23  | -2.91 |
| 2,2-Dimethyl-3-pentanol                  | 135.90 | 35.80  | 38.71  | -2.91 |
| 1-Ethyl-3-methylimidazolium L-proline    | 219.90 | 58.84  | 61.75  | -2.91 |
| Octyl octanoate                          | 290.70 | 78.26  | 81.17  | -2.91 |
| 2-Methylbenzenemethanamine               | 126.90 | 39.15  | 36.24  | 2.91  |
| 2-Aminoisobutanol                        | 98.70  | 25.60  | 28.51  | -2.91 |
| Ethyl-n-hexylether                       | 154.70 | 40.96  | 43.87  | -2.91 |
| Propanal                                 | 64.50  | 16.22  | 19.13  | -2.91 |
| Dimethylphosphinic acid ethylester       | 116.80 | 30.57  | 33.47  | -2.90 |
| Dipropylphosphinic chloride              | 148.30 | 39.21  | 42.11  | -2.90 |
| 1,4-Dibromobutane                        | 115.00 | 35.88  | 32.98  | 2.90  |
| 2-Methoxybenzenemethanamine              | 135.20 | 41.42  | 38.52  | 2.90  |
| 2-Methyl-2-hexanol                       | 136.70 | 36.03  | 38.93  | -2.90 |
| Butyronitrile                            | 79.60  | 20.37  | 23.27  | -2.90 |
| Bis(methylthio)methane                   | 99.30  | 31.57  | 28.67  | 2.90  |
| Allyl sulfide                            | 119.10 | 37.00  | 34.10  | 2.90  |
| 1-Nitropentane                           | 118.20 | 30.96  | 33.86  | -2.90 |
| Dipropyl O-propyl phosphorus oxide       | 200.30 | 53.48  | 56.37  | -2.89 |
| Safrole                                  | 152.40 | 46.13  | 43.24  | 2.89  |
| Diisobutylbutylthioborane                | 243.30 | 71.06  | 68.17  | 2.89  |
| 2,4-Dinitroanisole                       | 155.40 | 46.95  | 44.06  | 2.89  |
| Nonanedinitrile                          | 164.30 | 43.61  | 46.50  | -2.89 |
| 2,3-Dimethyl-2-butanol                   | 119.20 | 31.24  | 34.13  | -2.89 |
| Trichloroacetic anhydride                | 174.80 | 52.27  | 49.38  | 2.89  |
| Isobutyl ricinoleate                     | 393.00 | 106.34 | 109.23 | -2.89 |
| 2,3-Dihydro-1,4-dioxin                   | 81.20  | 20.82  | 23.71  | -2.89 |
| Methyl octadecanoate                     | 340.60 | 91.97  | 94.86  | -2.89 |
| n-Butylnitrite                           | 103.10 | 26.83  | 29.71  | -2.88 |
| 2-Vinylpyridine                          | 106.50 | 33.53  | 30.65  | 2.88  |
| 2-t-Butyl-6-methylphenol                 | 172.20 | 51.55  | 48.67  | 2.88  |
| Dipropyl ether                           | 121.10 | 31.77  | 34.65  | -2.88 |
| 2-Methyl-2-octanol                       | 170.10 | 45.21  | 48.09  | -2.88 |
| 1-Bromo-3-methyl-2-butene                | 106.40 | 33.50  | 30.62  | 2.88  |
| 2-Ethylnitrobenzene                      | 137.50 | 42.03  | 39.15  | 2.88  |
| t-Pentylbenzene                          | 164.70 | 49.49  | 46.61  | 2.88  |
| 3-Methyl-1-phenyl-1-butanone             | 167.80 | 50.34  | 47.46  | 2.88  |
| Dipropylacetamide                        | 158.90 | 42.14  | 45.02  | -2.88 |
| Isobutylbenzene                          | 149.10 | 45.21  | 42.33  | 2.88  |
| 2-Methyl-4-heptanol                      | 153.10 | 40.55  | 43.43  | -2.88 |
| Cyclopentylphosphine                     | 106.30 | 33.47  | 30.59  | 2.88  |
| Isobutyl nitrate                         | 109.60 | 28.62  | 31.50  | -2.88 |
| 5-Chlorovaleric acid                     | 120.50 | 31.61  | 34.49  | -2.88 |

|                                          |        |        |        |       |
|------------------------------------------|--------|--------|--------|-------|
| Disilanomethane                          | 83.30  | 27.16  | 24.28  | 2.88  |
| 4-Allyl-2-methoxyphenyl acetate          | 196.00 | 58.07  | 55.20  | 2.87  |
| 1-Hexanol                                | 120.60 | 31.64  | 34.51  | -2.87 |
| 2-Ethyl octanoic acid                    | 187.10 | 49.88  | 52.75  | -2.87 |
| 2-Propylheptanoic acid                   | 187.10 | 49.88  | 52.75  | -2.87 |
| 4-(Pentyloxy)benzoyl chloride            | 209.20 | 61.69  | 58.82  | 2.87  |
| 2-Propylthiophene                        | 125.20 | 38.65  | 35.78  | 2.87  |
| 1,2-Bis(dipentylborinoxy)ethane          | 428.60 | 116.12 | 118.99 | -2.87 |
| 3,3-Dimethylhexanoic acid                | 153.30 | 40.61  | 43.48  | -2.87 |
| Amylbenzene                              | 165.60 | 49.73  | 46.86  | 2.87  |
| Dimethylacetamide                        | 93.50  | 24.21  | 27.08  | -2.87 |
| 2,4-Dimethyl-3-pentanol                  | 135.90 | 35.84  | 38.71  | -2.87 |
| 3-Methyl-3-hexanol                       | 136.30 | 35.95  | 38.82  | -2.87 |
| Bis(ethoxyfluorothiophosphorus) oxide    | 189.20 | 56.20  | 53.33  | 2.87  |
| 2,2-Dimethylnonanoic acid                | 204.00 | 54.52  | 57.39  | -2.87 |
| 3-Methyl-3-heptanol                      | 152.70 | 40.45  | 43.32  | -2.87 |
| Propyl isocyanate                        | 87.50  | 22.57  | 25.44  | -2.87 |
| Dimethylamine                            | 57.20  | 14.26  | 17.12  | -2.86 |
| Propanone                                | 64.60  | 16.29  | 19.15  | -2.86 |
| 2-Ethyltoluene                           | 131.80 | 40.45  | 37.59  | 2.86  |
| Vinylformate                             | 68.90  | 17.47  | 20.33  | -2.86 |
| Tri(1-chloroethoxy)borine                | 198.40 | 52.99  | 55.85  | -2.86 |
| t-Butylnitrite                           | 102.80 | 26.77  | 29.63  | -2.86 |
| Tributylphosphine                        | 234.00 | 68.48  | 65.62  | 2.86  |
| 2,2,3-Trimethylbutanoic acid             | 136.30 | 35.96  | 38.82  | -2.86 |
| s-Butylnitrite                           | 102.90 | 26.80  | 29.66  | -2.86 |
| cis-2-Methylcyclopentanol                | 109.90 | 28.72  | 31.58  | -2.86 |
| 5-Decanol                                | 187.30 | 49.95  | 52.81  | -2.86 |
| DTBP                                     | 163.60 | 43.45  | 46.31  | -2.86 |
| 2-Cyclopentylthiacyclohexane             | 174.70 | 52.21  | 49.35  | 2.86  |
| 2-Methylbenzaldehyde                     | 118.70 | 36.85  | 33.99  | 2.86  |
| Dihexyl maleate                          | 295.90 | 79.74  | 82.60  | -2.86 |
| Chloro di(2-octoxy)borine                | 323.60 | 87.34  | 90.19  | -2.85 |
| Isopropylphenylphosphinic chloride       | 169.10 | 50.67  | 47.82  | 2.85  |
| t-Butyl-t-amylperoxide                   | 179.80 | 47.90  | 50.75  | -2.85 |
| Isobutyronitrile                         | 79.50  | 20.39  | 23.24  | -2.85 |
| Hexylbenzene                             | 182.60 | 54.37  | 51.52  | 2.85  |
| Diethoxydimethylsilane                   | 154.60 | 40.99  | 43.84  | -2.85 |
| Methyl 4-chlorophenylphosphinic chloride | 150.70 | 45.62  | 42.77  | 2.85  |
| 2,3,4-Trimethylhexanoic acid             | 169.80 | 45.16  | 48.01  | -2.85 |
| 1-Phenyl-1-dodecanone                    | 285.60 | 82.62  | 79.77  | 2.85  |
| Tetraoctoxysilane                        | 602.70 | 163.90 | 166.75 | -2.85 |
| N-(2-Aminoethyl)ethanolamine             | 111.20 | 29.09  | 31.94  | -2.85 |
| m-Anisidine                              | 120.60 | 37.36  | 34.51  | 2.85  |
| 1-Butyl-3-methylimidazolium octylsulfate | 338.70 | 91.49  | 94.34  | -2.85 |
| Ethyl cyanate                            | 72.40  | 18.45  | 21.29  | -2.84 |
| 4-Ethyl-4-heptanol                       | 168.90 | 44.92  | 47.76  | -2.84 |
| 4-Pentyn-1-ol                            | 93.90  | 24.35  | 27.19  | -2.84 |
| 6-Undecanone                             | 197.00 | 52.63  | 55.47  | -2.84 |

|                                        |        |        |        |       |
|----------------------------------------|--------|--------|--------|-------|
| Methyl chlorocarbonate                 | 71.40  | 18.18  | 21.02  | -2.84 |
| Pentanenitrile                         | 96.30  | 25.01  | 27.85  | -2.84 |
| Dioctyl maleate                        | 362.70 | 98.08  | 100.92 | -2.84 |
| Diallyl succinate                      | 190.50 | 50.85  | 53.69  | -2.84 |
| 2-(Isopropylamino)ethanol              | 115.50 | 30.28  | 33.12  | -2.84 |
| N-Methylbenzeneethanamine              | 144.60 | 43.93  | 41.10  | 2.83  |
| Fulvene                                | 84.70  | 27.50  | 24.67  | 2.83  |
| Dimethyldihexoxysilane                 | 287.50 | 77.46  | 80.29  | -2.83 |
| 2-Ethoxyethanamine                     | 99.70  | 25.95  | 28.78  | -2.83 |
| 1,3-Dibromobutane                      | 114.60 | 35.70  | 32.87  | 2.83  |
| 2-Butylthiophene                       | 142.20 | 43.27  | 40.44  | 2.83  |
| Methyl-n-propylketone                  | 97.00  | 25.21  | 28.04  | -2.83 |
| 1,2-Bis(triethylsilyl)ethane           | 296.50 | 85.59  | 82.76  | 2.83  |
| Trifluoromethoxybenzene                | 123.20 | 32.40  | 35.23  | -2.83 |
| 6-Methyl-1-heptanol                    | 153.60 | 40.74  | 43.57  | -2.83 |
| 2,4-Dimethyl-3-pentanone               | 129.50 | 34.13  | 36.96  | -2.83 |
| Butylbenzene                           | 148.90 | 45.10  | 42.28  | 2.82  |
| Propiolic acid                         | 63.10  | 15.92  | 18.74  | -2.82 |
| Fluorocyclohexane                      | 105.50 | 27.55  | 30.37  | -2.82 |
| 3,3-Dimethyl-1-butanol                 | 119.60 | 31.42  | 34.24  | -2.82 |
| 1-Chloro-2-fluoroethane                | 64.00  | 16.17  | 18.99  | -2.82 |
| 2-Isopropyl-5-methylphenol             | 156.90 | 47.29  | 44.47  | 2.82  |
| Diethyl fumarate                       | 163.70 | 43.52  | 46.34  | -2.82 |
| Isopropyl propyl ether                 | 121.00 | 31.81  | 34.62  | -2.81 |
| Triethylammonium acetate               | 175.50 | 46.76  | 49.57  | -2.81 |
| 1,2-Dimethoxy-4-allylbenzene           | 178.80 | 53.29  | 50.48  | 2.81  |
| Arachic alcohol                        | 354.40 | 95.83  | 98.64  | -2.81 |
| DEET                                   | 197.80 | 58.50  | 55.69  | 2.81  |
| 2-Chloro-1,1-difluoro-4-iodo-1-butene  | 120.80 | 37.38  | 34.57  | 2.81  |
| Ethylphosphinic dichloride             | 95.10  | 30.33  | 27.52  | 2.81  |
| Dimethyldipentoxysilane                | 254.30 | 68.38  | 71.19  | -2.81 |
| Dibutyl ether                          | 154.50 | 41.01  | 43.81  | -2.80 |
| N-Butylhydroxylamine                   | 99.30  | 25.87  | 28.67  | -2.80 |
| Tetrahydrofurfuryl methacrylate        | 167.00 | 44.44  | 47.24  | -2.80 |
| 1,2-Bis(tributylsilyl)acetylene        | 487.90 | 138.06 | 135.26 | 2.80  |
| Cyclopentadecanone                     | 238.20 | 69.57  | 66.77  | 2.80  |
| Mecrylate                              | 102.50 | 26.75  | 29.55  | -2.80 |
| Benzyl isonitrile                      | 118.00 | 36.60  | 33.80  | 2.80  |
| 1-Chloro-4-ethoxybenzene               | 140.10 | 42.66  | 39.86  | 2.80  |
| t-Butylbenzene                         | 148.60 | 44.99  | 42.19  | 2.80  |
| Tetrahexoxysilane                      | 469.80 | 127.50 | 130.29 | -2.79 |
| 4-Chloropentanoic acid                 | 120.20 | 31.61  | 34.40  | -2.79 |
| 1,2-Dichloro-1,1-difluoro-2-iodoethane | 107.30 | 33.66  | 30.87  | 2.79  |
| 3,4-Dihydro-2-methoxy-2H-pyran         | 114.40 | 30.02  | 32.81  | -2.79 |
| t-Nitrobutane                          | 101.20 | 26.40  | 29.19  | -2.79 |
| Ethyl myristate                        | 290.20 | 78.24  | 81.03  | -2.79 |
| Diallyl oxalate                        | 158.40 | 42.09  | 44.88  | -2.79 |
| Propyl 3-chloropropanoate              | 137.80 | 36.44  | 39.23  | -2.79 |
| Mustard gas                            | 125.50 | 38.65  | 35.86  | 2.79  |

|                                                                           |        |        |        |       |
|---------------------------------------------------------------------------|--------|--------|--------|-------|
| 5-Isopropyl-2-methylphenol                                                | 155.80 | 46.96  | 44.17  | 2.79  |
| 1-Chloro-4-fluorobutane                                                   | 97.40  | 25.36  | 28.15  | -2.79 |
| 2-Methyl-1-undecanol                                                      | 219.90 | 58.96  | 61.75  | -2.79 |
| 2-Iodoethanol                                                             | 78.40  | 25.73  | 22.94  | 2.79  |
| 2-(Ethylamino)ethanol                                                     | 99.40  | 25.91  | 28.70  | -2.79 |
| 1-Butyl-3-methylimidazolium threoninate                                   | 254.60 | 68.48  | 71.27  | -2.79 |
| 4-Pentenoic acid                                                          | 100.70 | 26.27  | 29.06  | -2.79 |
| N,N-Diethyl-O-benzylhydroxylamine                                         | 186.70 | 55.43  | 52.64  | 2.79  |
| Tetrahydrofuran                                                           | 77.40  | 19.88  | 22.67  | -2.79 |
| Dibutylmethylsilyl bromide                                                | 205.70 | 60.64  | 57.86  | 2.78  |
| Oxetane                                                                   | 61.90  | 15.63  | 18.41  | -2.78 |
| Ethyl propiolate                                                          | 96.90  | 25.23  | 28.01  | -2.78 |
| 2-Methyl-5-undecanol                                                      | 220.20 | 59.05  | 61.83  | -2.78 |
| 1,3-Dibromopropane                                                        | 98.30  | 31.18  | 28.40  | 2.78  |
| Butyl ricinoleate                                                         | 393.30 | 106.53 | 109.31 | -2.78 |
| Benzyl chloroformate                                                      | 142.60 | 43.33  | 40.55  | 2.78  |
| 2-Butyl-2-ethyl-1,3-propanediol                                           | 177.10 | 47.23  | 50.01  | -2.78 |
| 1-Undecanol                                                               | 204.10 | 54.64  | 57.42  | -2.78 |
| Di-t-butylsulfide                                                         | 160.70 | 48.29  | 45.51  | 2.78  |
| 2-Chloroacetophenone                                                      | 131.90 | 40.39  | 37.61  | 2.78  |
| Hexyl nitrite                                                             | 136.50 | 36.10  | 38.88  | -2.78 |
| 1,8(H)-Diazabicyclo[5.4.0]undec-7-enium<br>pyrazolate                     | 218.90 | 64.25  | 61.48  | 2.77  |
| 2-Ethylthiovinyl dibutoxy phosphorus oxide                                | 270.60 | 78.43  | 75.66  | 2.77  |
| 1-Ethyl-3-methylimidazolium<br>methylphosphonate                          | 186.40 | 49.79  | 52.56  | -2.77 |
| 1-Butyl-3-methylimidazolium acetate                                       | 202.40 | 54.18  | 56.95  | -2.77 |
| Dimethyl thiodipropionate                                                 | 187.70 | 50.15  | 52.92  | -2.77 |
| 2-Phenyltetrahydropyran                                                   | 163.80 | 49.13  | 46.36  | 2.77  |
| 1-[(2-Aminoethyl)amino]-2-propanol                                        | 127.90 | 33.75  | 36.52  | -2.77 |
| Allyl propanoate                                                          | 117.80 | 30.98  | 33.75  | -2.77 |
| 2-Chloroanisole                                                           | 123.30 | 38.02  | 35.25  | 2.77  |
| Tetrahydro-4H-pyran-4-one                                                 | 95.70  | 24.92  | 27.68  | -2.76 |
| Ethylisopropylketone                                                      | 113.00 | 29.67  | 32.43  | -2.76 |
| 2-Undecanol                                                               | 204.00 | 54.63  | 57.39  | -2.76 |
| 1,1-Propanedithiol                                                        | 114.90 | 35.71  | 32.95  | 2.76  |
| n-Amyl ether                                                              | 188.10 | 50.27  | 53.03  | -2.76 |
| 2-Tolunitrile                                                             | 116.80 | 36.23  | 33.47  | 2.76  |
| 1,1,2,2-Tetra-t-butylethane                                               | 295.60 | 85.27  | 82.51  | 2.76  |
| 4-Allylphenol                                                             | 136.10 | 41.52  | 38.77  | 2.75  |
| 3-Chloroacetophenone                                                      | 132.60 | 40.56  | 37.81  | 2.75  |
| (Bromomethyl)trimethylsilane                                              | 123.60 | 38.09  | 35.34  | 2.75  |
| 4-Morpholineethanol                                                       | 130.80 | 34.56  | 37.31  | -2.75 |
| Dichloro(dichloromethyl)methylsilane                                      | 127.40 | 39.13  | 36.38  | 2.75  |
| Trihexyl tetradecyl phosphonium bis(2,2,4-<br>trimethylpentyl)phosphinate | 875.20 | 244.24 | 241.49 | 2.75  |
| 2-Methylpropanal                                                          | 80.70  | 20.82  | 23.57  | -2.75 |
| 3-Octanone                                                                | 147.20 | 39.06  | 41.81  | -2.75 |
| 2-Tetralone                                                               | 140.60 | 42.75  | 40.00  | 2.75  |
| 1,2,3,4-Tetrachloro-5,5-dimethoxy-1,3-                                    | 182.20 | 54.16  | 51.41  | 2.75  |

|                                          |        |       |       |       |
|------------------------------------------|--------|-------|-------|-------|
| cyclopentadiene                          |        |       |       |       |
| Isobutylnitrite                          | 102.90 | 26.91 | 29.66 | -2.75 |
| Propyl chloroformate                     | 104.90 | 27.46 | 30.21 | -2.75 |
| 1-Pentadecanoic acid                     | 273.30 | 73.65 | 76.40 | -2.75 |
| cis-2-Butene-1,4-diol                    | 89.80  | 23.32 | 26.07 | -2.75 |
| Diethylketone                            | 96.80  | 25.24 | 27.99 | -2.75 |
| 1,2-Oxathiane 2,2-dioxide                | 107.70 | 28.23 | 30.98 | -2.75 |
| Allylacetoacetate                        | 136.50 | 36.13 | 38.88 | -2.75 |
| Allyl phenyl ether                       | 136.90 | 41.73 | 38.99 | 2.74  |
| Ethyl 2-chloropropionate                 | 121.00 | 31.88 | 34.62 | -2.74 |
| Acetic acid 1-chloroethylester           | 104.30 | 27.30 | 30.04 | -2.74 |
| Allyl acetate                            | 101.20 | 26.45 | 29.19 | -2.74 |
| Benzaldehyde                             | 102.60 | 32.32 | 29.58 | 2.74  |
| Ethylpropylphosphinic chloride           | 131.60 | 34.79 | 37.53 | -2.74 |
| N-Methylformanilide                      | 130.10 | 39.86 | 37.12 | 2.74  |
| 1,3,2-Benzodioxaborole                   | 107.20 | 28.10 | 30.84 | -2.74 |
| 3-Hexanone                               | 113.90 | 29.94 | 32.68 | -2.74 |
| Phthalthrin                              | 315.00 | 90.57 | 87.84 | 2.73  |
| 2-Methyloxetane                          | 78.60  | 20.26 | 22.99 | -2.73 |
| 1-Bromo-7,7-dichlorooctane               | 191.20 | 56.61 | 53.88 | 2.73  |
| 2-Nitrophenol                            | 113.80 | 35.38 | 32.65 | 2.73  |
| Dibutyl fumarate                         | 230.40 | 61.90 | 64.63 | -2.73 |
| 4-Methoxy-4-methyl-2-pentanone           | 137.90 | 36.53 | 39.26 | -2.73 |
| n-Decyl alcohol                          | 187.00 | 50.00 | 52.73 | -2.73 |
| n-Valeraldehyde                          | 97.60  | 25.48 | 28.21 | -2.73 |
| 3-Chloro-1,1-diethoxypropane             | 161.40 | 42.98 | 45.71 | -2.73 |
| 2-Ethylthiophene                         | 108.50 | 33.92 | 31.20 | 2.72  |
| 1-(2-Tetrahydrofuryl)-3-butanone         | 145.50 | 38.62 | 41.34 | -2.72 |
| Diethylacetamide                         | 125.30 | 33.08 | 35.80 | -2.72 |
| 1,1,3,3-Tetramethylguanidinium butanoate | 209.70 | 56.23 | 58.95 | -2.72 |
| Allyl butyrate                           | 134.70 | 35.66 | 38.38 | -2.72 |
| Ethyl N-phenylcarbamate                  | 155.00 | 46.67 | 43.95 | 2.72  |
| Di-n-hexylether                          | 221.50 | 59.47 | 62.19 | -2.72 |
| 2-Ethyl-3-methyl-5-propylthiophane       | 183.70 | 54.54 | 51.82 | 2.72  |
| 3-Methylbutyl nitrate                    | 126.00 | 33.28 | 36.00 | -2.72 |
| Isocumene                                | 132.20 | 40.41 | 37.70 | 2.71  |
| Iodomethylsulfonyl fluoride              | 89.80  | 28.78 | 26.07 | 2.71  |
| 3-Methylbenzenemethanamine               | 127.50 | 39.12 | 36.41 | 2.71  |
| Hexanenitrile                            | 112.90 | 29.69 | 32.40 | -2.71 |
| 1-Chloro-5-fluoropentane                 | 114.10 | 30.02 | 32.73 | -2.71 |
| 5-Methoxy-1-cyclohexyl-1-pentanol        | 218.00 | 58.52 | 61.23 | -2.71 |
| 3-Fluorobenzoyl chloride                 | 121.50 | 37.47 | 34.76 | 2.71  |
| 2-Butoxyvinyl diethoxy phosphorus oxide  | 229.70 | 61.73 | 64.44 | -2.71 |
| 1,2,3,4-Tetrahydroisoquinoline           | 133.90 | 40.87 | 38.16 | 2.71  |
| 2,3,4-Trimethylpentanoic acid            | 152.40 | 40.53 | 43.24 | -2.71 |
| Ethyl 3-butenolate                       | 117.80 | 31.04 | 33.75 | -2.71 |
| 2-Cyclohexylthiacyclohexane              | 190.80 | 56.47 | 53.77 | 2.70  |
| Pentyltrichlorosilane                    | 162.80 | 48.79 | 46.09 | 2.70  |
| 2-Dodecanol                              | 220.70 | 59.27 | 61.97 | -2.70 |

|                                  |        |       |       |       |
|----------------------------------|--------|-------|-------|-------|
| 2-Chloro-1,1-dimethoxyethane     | 111.10 | 29.21 | 31.91 | -2.70 |
| 1-(3-Methylphenyl)ethanone       | 134.30 | 40.97 | 38.27 | 2.70  |
| 1-Chloroethylsulfonyl fluoride   | 96.00  | 25.07 | 27.77 | -2.70 |
| 2,5-Dimethyl-5-undecanol         | 236.00 | 63.47 | 66.17 | -2.70 |
| t-Butyl peroxybenzoate           | 188.60 | 55.86 | 53.17 | 2.69  |
| 2-Nitroethylbenzene              | 138.70 | 42.17 | 39.48 | 2.69  |
| alpha-Methylcyclopropanemethanol | 97.00  | 25.35 | 28.04 | -2.69 |
| 2-Tolyl dibutoxyborine           | 262.70 | 76.18 | 73.49 | 2.69  |
| Isovaleronitrile                 | 95.90  | 25.05 | 27.74 | -2.69 |
| Bis(diethylmethylsilyl)amine     | 237.40 | 69.24 | 66.55 | 2.69  |
| 1-Dodecanol                      | 220.80 | 59.31 | 62.00 | -2.69 |
| 2,3-Dimethylthiophene            | 108.90 | 33.99 | 31.31 | 2.68  |
| Methyldibutoxysilane             | 204.60 | 54.87 | 57.55 | -2.68 |
| 1,2-Dimethyl-3-nitrobenzene      | 137.60 | 41.86 | 39.18 | 2.68  |
| 2,2,4-Trimethyl-1,3-pentanediol  | 158.00 | 42.09 | 44.77 | -2.68 |
| Butylisothiocyanate              | 114.60 | 35.55 | 32.87 | 2.68  |
| 3,3-Dimethyloxetane              | 95.10  | 24.84 | 27.52 | -2.68 |
| 2-Propyn-1-ol                    | 60.50  | 15.35 | 18.03 | -2.68 |
| 2,6-Dimethylanisole              | 138.20 | 42.02 | 39.34 | 2.68  |
| 1,3-Dimethylbenzene              | 116.80 | 36.15 | 33.47 | 2.68  |
| Phenyl di(sec-butoxy)borine      | 245.50 | 71.45 | 68.77 | 2.68  |
| Tetramethyloxirane               | 112.70 | 29.67 | 32.35 | -2.68 |
| Isopropylsulfonyl fluoride       | 98.40  | 25.75 | 28.43 | -2.68 |
| 3-Ethoxytoluene                  | 142.30 | 43.14 | 40.47 | 2.67  |
| 1-Phenylallyl alcohol            | 134.90 | 41.11 | 38.44 | 2.67  |
| Dibromomethane                   | 64.90  | 21.91 | 19.24 | 2.67  |
| 1-Ethyl-2-propyn-1-ylether       | 94.60  | 24.71 | 27.38 | -2.67 |
| Ethylacetamide                   | 92.30  | 24.08 | 26.75 | -2.67 |
| 4-Tridecanol                     | 237.40 | 63.88 | 66.55 | -2.67 |
| Carbonyl dicyanide               | 66.30  | 16.95 | 19.62 | -2.67 |
| Ethylbenzene                     | 116.10 | 35.95 | 33.28 | 2.67  |
| 2-Chloro-1,3-propanediol         | 91.60  | 23.89 | 26.56 | -2.67 |
| Widdrene                         | 221.40 | 64.83 | 62.16 | 2.67  |
| Cyclohexylhydroperoxide          | 119.30 | 31.49 | 34.16 | -2.67 |
| 6-Methyl-2-heptanol acetate      | 189.30 | 50.69 | 53.36 | -2.67 |
| 4-Methyl-3-heptanol              | 152.80 | 40.68 | 43.35 | -2.67 |
| 3-Methyl-1-heptanol              | 153.20 | 40.79 | 43.46 | -2.67 |
| 1,4-Dimethyl-2-nitrobenzene      | 138.10 | 41.98 | 39.31 | 2.67  |
| beta-Santalol                    | 232.10 | 67.76 | 65.10 | 2.66  |
| 2-Methylundecanal                | 214.00 | 57.47 | 60.13 | -2.66 |
| 2-Nitrotoluene                   | 121.20 | 37.34 | 34.68 | 2.66  |
| N-Methylformamide                | 59.70  | 15.15 | 17.81 | -2.66 |
| 6-Heptenoic acid                 | 134.00 | 35.53 | 38.19 | -2.66 |
| Heptyl 2-thiophenecarboxylate    | 220.30 | 64.52 | 61.86 | 2.66  |
| N-Acetyl-N-methylacetamide       | 110.30 | 29.03 | 31.69 | -2.66 |
| 5-Hexenoic acid                  | 117.30 | 30.95 | 33.61 | -2.66 |
| 2-Chloropropanoic acid           | 87.00  | 22.64 | 25.30 | -2.66 |
| 4-Heptanone                      | 129.80 | 34.38 | 37.04 | -2.66 |
| Butanal                          | 81.20  | 21.05 | 23.71 | -2.66 |

|                                                      |        |        |        |       |
|------------------------------------------------------|--------|--------|--------|-------|
| Ethyl t-butyl ether                                  | 120.50 | 31.83  | 34.49  | -2.66 |
| N,N-Diethylhydroxylamine                             | 99.20  | 25.99  | 28.64  | -2.65 |
| 3-Methyl-2-butanone                                  | 96.50  | 25.25  | 27.90  | -2.65 |
| Propane-1,2-dithiol                                  | 98.30  | 31.05  | 28.40  | 2.65  |
| n-Dodecanal                                          | 214.40 | 57.59  | 60.24  | -2.65 |
| N,N-Diethylformamide                                 | 109.80 | 28.90  | 31.55  | -2.65 |
| Cyclooctanol                                         | 142.50 | 37.87  | 40.52  | -2.65 |
| 1,6-Hexamethylene diisocyanate                       | 163.50 | 43.63  | 46.28  | -2.65 |
| Methyl N,N-diethylamino phosphorusoxy fluoride       | 135.90 | 36.06  | 38.71  | -2.65 |
| n-Butyl-3-chloropropanoate                           | 154.60 | 41.19  | 43.84  | -2.65 |
| 2-Cyanobutane                                        | 95.90  | 25.09  | 27.74  | -2.65 |
| n-Propylvinylacetate                                 | 134.40 | 35.65  | 38.30  | -2.65 |
| Propham                                              | 172.80 | 51.48  | 48.83  | 2.65  |
| 2,3,6-Collidine                                      | 127.30 | 39.00  | 36.35  | 2.65  |
| Bis(triethylsilyl)amine                              | 270.70 | 78.33  | 75.68  | 2.65  |
| Phenylisocyanate                                     | 108.90 | 33.95  | 31.31  | 2.64  |
| Benzoxazole                                          | 104.50 | 32.74  | 30.10  | 2.64  |
| 2-Bromo-2-chloro-1,1,1-trifluoroethane               | 92.00  | 24.03  | 26.67  | -2.64 |
| (3-Chloropropyl)benzene                              | 146.40 | 44.23  | 41.59  | 2.64  |
| Bromopentafluorobenzene                              | 126.30 | 33.44  | 36.08  | -2.64 |
| 3-Aminopropionitrile                                 | 74.60  | 19.26  | 21.90  | -2.64 |
| 1,1-Dibromobutane                                    | 114.70 | 35.53  | 32.90  | 2.63  |
| 2-Propyl-1,4-dioxane                                 | 134.70 | 35.75  | 38.38  | -2.63 |
| 5-Methyl-2,3-hexanedione                             | 132.40 | 35.12  | 37.75  | -2.63 |
| 3,3-Dimethoxy-1-propene                              | 108.00 | 28.43  | 31.06  | -2.63 |
| 2,5-Dipropyl-3-ethylthiophane                        | 217.10 | 63.61  | 60.98  | 2.63  |
| Acetophenone                                         | 118.30 | 36.51  | 33.88  | 2.63  |
| 12-Tricosanone                                       | 397.40 | 107.81 | 110.44 | -2.63 |
| 5-Propyl-4-tridecanol                                | 285.80 | 77.20  | 79.83  | -2.63 |
| 2-Chloropropanal                                     | 78.20  | 20.26  | 22.88  | -2.62 |
| Cumene                                               | 132.20 | 40.32  | 37.70  | 2.62  |
| 3-Butenoic acid                                      | 83.70  | 21.77  | 24.39  | -2.62 |
| 2-Octanone                                           | 147.10 | 39.16  | 41.78  | -2.62 |
| 3-Butyn-1-ol                                         | 77.20  | 19.99  | 22.61  | -2.62 |
| Isopropylnitrate                                     | 92.40  | 24.16  | 26.78  | -2.62 |
| Trichlorovinylsilane                                 | 107.50 | 33.54  | 30.92  | 2.62  |
| 1-Methylpyridinium methylsulfate                     | 172.20 | 46.05  | 48.67  | -2.62 |
| Tridecyl methacrylate                                | 301.70 | 81.57  | 84.19  | -2.62 |
| 1-Butyl-3-methylimidazolium tetracyanoborate         | 251.60 | 67.83  | 70.45  | -2.62 |
| n-Butyl-2-chloropropanoate                           | 154.40 | 41.17  | 43.79  | -2.62 |
| Phenyl O-nonyl phosphonic acid                       | 272.60 | 78.82  | 76.21  | 2.61  |
| gamma-Undecanolactone                                | 194.90 | 52.28  | 54.89  | -2.61 |
| 2-Isoamyloxyvinyl bis(dibutylamino) phosphorus oxide | 440.50 | 124.87 | 122.26 | 2.61  |
| 2-Diethylaminoethanol                                | 130.80 | 34.70  | 37.31  | -2.61 |
| 2-Methyl-2-heptanol                                  | 153.40 | 40.90  | 43.51  | -2.61 |
| Benzylmethylamine                                    | 128.10 | 39.18  | 36.57  | 2.61  |
| 2-Fluorobenzoyl chloride                             | 121.10 | 37.26  | 34.65  | 2.61  |

|                                                 |        |        |        |       |
|-------------------------------------------------|--------|--------|--------|-------|
| 4-Methylbenzenepropanal                         | 151.00 | 45.46  | 42.85  | 2.61  |
| Bis(2-ethylhexyl) phosphite                     | 322.10 | 87.18  | 89.78  | -2.60 |
| 3,4-Lutidine                                    | 111.10 | 34.51  | 31.91  | 2.60  |
| 3-Chlorophenol                                  | 106.40 | 33.22  | 30.62  | 2.60  |
| Propyl isothiocyanate                           | 97.80  | 30.86  | 28.26  | 2.60  |
| 7-Hexyl-7-pentadecanol                          | 369.30 | 100.13 | 102.73 | -2.60 |
| Cyclobutanone                                   | 72.20  | 18.64  | 21.24  | -2.60 |
| Isobutyl 3-chloropropionate                     | 154.30 | 41.16  | 43.76  | -2.60 |
| 1-Nitrohexane                                   | 134.90 | 35.84  | 38.44  | -2.60 |
| 1,7-Heptanedithiol                              | 165.30 | 49.37  | 46.77  | 2.60  |
| Methyl isoamyl ketone                           | 129.90 | 34.47  | 37.07  | -2.60 |
| Chloroacetone cyanohydrin                       | 102.30 | 26.90  | 29.49  | -2.59 |
| Caprylonitrile                                  | 146.30 | 38.97  | 41.56  | -2.59 |
| 2-Methylthiophene                               | 92.10  | 29.29  | 26.70  | 2.59  |
| 2-Allylphenol                                   | 136.00 | 41.33  | 38.74  | 2.59  |
| Octylcyanide                                    | 163.10 | 43.58  | 46.17  | -2.59 |
| 5,6,7,8-Tetrahydroquinoline                     | 134.00 | 40.78  | 38.19  | 2.59  |
| 2-Methyl-6-propyldioxane                        | 151.50 | 40.40  | 42.99  | -2.59 |
| Butyldichlorophosphine                          | 128.10 | 39.16  | 36.57  | 2.59  |
| Palmitic acid                                   | 290.00 | 78.39  | 80.98  | -2.59 |
| Ethyl chloroformate                             | 88.20  | 23.04  | 25.63  | -2.59 |
| Butyrolin                                       | 154.70 | 41.28  | 43.87  | -2.59 |
| 4-Allyl-2-methoxyphenol                         | 161.80 | 48.40  | 45.81  | 2.59  |
| 3-Chloroanisole                                 | 123.30 | 37.84  | 35.25  | 2.59  |
| 2,6-Dimethyl-4-ethylpyridine                    | 143.90 | 43.49  | 40.91  | 2.58  |
| Ethyl isocyanate                                | 70.80  | 18.27  | 20.85  | -2.58 |
| 1-Butoxy-4-methylbenzene                        | 175.70 | 52.21  | 49.63  | 2.58  |
| 4-Methylvaleronitrile                           | 112.50 | 29.71  | 32.29  | -2.58 |
| 2-Methoxyaniline                                | 120.40 | 37.04  | 34.46  | 2.58  |
| Ethyne                                          | 34.80  | 8.40   | 10.98  | -2.58 |
| Ethyl bis(diethylamino)chlorosilane             | 233.50 | 68.06  | 65.48  | 2.58  |
| 2,3-Dimethyl-3-pentanol                         | 135.20 | 35.94  | 38.52  | -2.58 |
| 2-Ethyltetrahydrofuran                          | 110.80 | 29.25  | 31.83  | -2.58 |
| Diethyl 2-methoxycarbonyl ethyl phosphine oxide | 184.30 | 49.41  | 51.99  | -2.58 |
| Ethyl phenyl butoxyborine                       | 208.10 | 61.09  | 58.51  | 2.58  |
| 3-Ethoxybenzaldehyde                            | 145.10 | 43.81  | 41.23  | 2.58  |
| 4-Formylmorpholine                              | 108.50 | 28.62  | 31.20  | -2.58 |
| Di-t-amyl peroxide                              | 195.70 | 52.54  | 55.11  | -2.57 |
| 1-Hexyl-3-methylimidazolium acetate             | 235.80 | 63.54  | 66.11  | -2.57 |
| 2-Ethyl-2 methyl-5-propylthiophane              | 184.20 | 54.53  | 51.96  | 2.57  |
| Capraldehyde                                    | 181.00 | 48.51  | 51.08  | -2.57 |
| Methylpropylphosphinic chloride                 | 114.90 | 30.38  | 32.95  | -2.57 |
| Heptaldoxime                                    | 143.30 | 38.17  | 40.74  | -2.57 |
| Heptanophenone                                  | 202.00 | 59.41  | 56.84  | 2.57  |
| N-Ethylformamide                                | 76.50  | 19.85  | 22.42  | -2.57 |
| Ethyl acrylate                                  | 101.40 | 26.68  | 29.25  | -2.57 |
| Isopentyl nitrite                               | 119.30 | 31.59  | 34.16  | -2.57 |
| 1-Ethyl-3-methylimidazolium dicyanamide         | 180.40 | 48.35  | 50.92  | -2.57 |



|                                      |        |        |        |       |
|--------------------------------------|--------|--------|--------|-------|
| 1-Ethylpyridinium ethylsulfate       | 205.70 | 55.29  | 57.86  | -2.57 |
| 2,6-Dimethyl-4-heptanol              | 169.60 | 45.39  | 47.95  | -2.56 |
| Chloromethylsulfonyl fluoride        | 79.40  | 20.65  | 23.21  | -2.56 |
| Benzyl chloroacetate                 | 158.90 | 47.58  | 45.02  | 2.56  |
| Hexyl 2-thiophenecarboxylate         | 203.60 | 59.84  | 57.28  | 2.56  |
| Dimethyl sulfite                     | 85.80  | 22.41  | 24.97  | -2.56 |
| 3-Nonanone                           | 163.60 | 43.75  | 46.31  | -2.56 |
| Nonylbenzene                         | 232.70 | 67.82  | 65.26  | 2.56  |
| 3,3-Dimethyl-2-butanol               | 118.90 | 31.49  | 34.05  | -2.56 |
| Cumylamine                           | 144.00 | 43.49  | 40.93  | 2.56  |
| 2-Methylbenzoic acid                 | 125.70 | 38.47  | 35.91  | 2.56  |
| 1,3-Diiodohexafluoropropane          | 139.20 | 42.17  | 39.62  | 2.55  |
| 4-Tetradecanol                       | 254.10 | 68.58  | 71.13  | -2.55 |
| Ethyl-isoamylketone                  | 146.80 | 39.15  | 41.70  | -2.55 |
| 4-Tolyl dibutoxyborine               | 265.00 | 76.67  | 74.12  | 2.55  |
| 2-(1-Ethylpropyl)pyridine            | 159.10 | 47.62  | 45.07  | 2.55  |
| Diisopropylphosphinic chloride       | 147.40 | 39.32  | 41.87  | -2.55 |
| Myristonitrile                       | 246.60 | 66.53  | 69.07  | -2.54 |
| Bis(di-isoamylamino)borane           | 376.00 | 107.11 | 104.57 | 2.54  |
| 3,4-Dihydro-2H-1-benzopyran-2-one    | 134.10 | 40.76  | 38.22  | 2.54  |
| 3,7-Dimethyl-3-octanol               | 185.60 | 49.80  | 52.34  | -2.54 |
| Diheptyl ether                       | 254.90 | 68.81  | 71.35  | -2.54 |
| 3,7-Dimethyl-1-octanol               | 186.10 | 49.94  | 52.48  | -2.54 |
| 4-Tolylacetate                       | 142.90 | 43.17  | 40.63  | 2.54  |
| 1-Phenyl-1-propanone                 | 135.10 | 41.03  | 38.49  | 2.54  |
| 2-(Diethylamino)ethyl acrylate       | 178.80 | 47.94  | 50.48  | -2.54 |
| N,N-Dimethylethanolamine             | 98.70  | 25.97  | 28.51  | -2.54 |
| Myristicin                           | 178.20 | 52.85  | 50.31  | 2.54  |
| 3-Heptynoic acid                     | 128.70 | 34.20  | 36.74  | -2.54 |
| 6-Oxabicyclo[3.1.0]hexane            | 86.80  | 22.71  | 25.24  | -2.53 |
| Methane                              | 28.10  | 6.61   | 9.14   | -2.53 |
| Butylmethylketone                    | 113.30 | 29.98  | 32.51  | -2.53 |
| 4-Methylbenzeneacetaldehyde          | 134.80 | 40.94  | 38.41  | 2.53  |
| Butyrophenone                        | 151.90 | 45.63  | 43.10  | 2.53  |
| 2-Bromo-3,3-difluoro-2-propen-1-ol   | 92.80  | 24.36  | 26.89  | -2.53 |
| Myrcene                              | 159.20 | 47.63  | 45.10  | 2.53  |
| Tetrachloroethylene                  | 96.20  | 30.35  | 27.82  | 2.53  |
| 1,4-Dimethylbenzene                  | 116.80 | 36.00  | 33.47  | 2.53  |
| Tributyl phosphite                   | 259.70 | 70.14  | 72.67  | -2.53 |
| 3-Methylhexanal                      | 130.30 | 34.65  | 37.17  | -2.52 |
| Butoxyacetylene                      | 111.30 | 29.44  | 31.96  | -2.52 |
| Hydrocinnamyl alcohol                | 141.10 | 42.66  | 40.14  | 2.52  |
| 3-Methylthiophene                    | 92.10  | 29.22  | 26.70  | 2.52  |
| 2-Tolyl diethoxyborine               | 195.90 | 57.69  | 55.17  | 2.52  |
| Diisoamyl ether                      | 187.20 | 50.26  | 52.78  | -2.52 |
| Methylbutylphosphinic chloride       | 131.60 | 35.01  | 37.53  | -2.52 |
| 1-Pentyl-3-methylimidazolium acetate | 219.10 | 59.01  | 61.53  | -2.52 |
| 3-Iodo-1-propanol                    | 95.10  | 30.04  | 27.52  | 2.52  |
| 1-(2-Methylphenyl)ethanone           | 132.30 | 40.24  | 37.72  | 2.52  |

|                                           |        |       |       |       |
|-------------------------------------------|--------|-------|-------|-------|
| 2-Methyltetrahydrofuran                   | 94.10  | 24.73 | 27.25 | -2.52 |
| 1,1,1-Bromodichloroethane                 | 91.40  | 29.02 | 26.51 | 2.51  |
| 1-Bromo-2-butene                          | 90.60  | 28.80 | 26.29 | 2.51  |
| Cyclopentanol                             | 93.40  | 24.54 | 27.05 | -2.51 |
| Isovaleraldehyde                          | 97.30  | 25.61 | 28.12 | -2.51 |
| Amylobarbitone                            | 213.60 | 57.51 | 60.02 | -2.51 |
| Ethyl isothiocyanate                      | 81.20  | 26.22 | 23.71 | 2.51  |
| 2,2,4-Trimethyl-3-pentanol                | 151.40 | 40.45 | 42.96 | -2.51 |
| Diethylphosphinic chloride                | 114.90 | 30.44 | 32.95 | -2.51 |
| Pentyl 2-thiophenecarboxylate             | 186.90 | 55.21 | 52.70 | 2.51  |
| N,N-Dimethylbutyramide                    | 125.80 | 33.43 | 35.94 | -2.51 |
| Trimethylsilylaminotrimethoxysilane       | 199.70 | 53.70 | 56.21 | -2.51 |
| Peonol                                    | 151.10 | 45.39 | 42.88 | 2.51  |
| Pentachloroethane                         | 115.30 | 35.57 | 33.06 | 2.51  |
| Pivalonitrile                             | 95.90  | 25.23 | 27.74 | -2.51 |
| 2-Methylpropenoic acid                    | 84.00  | 21.97 | 24.48 | -2.51 |
| 1,3,5-Cyclooctatriene                     | 116.30 | 35.84 | 33.33 | 2.51  |
| Ethyl methacrylate                        | 117.90 | 31.27 | 33.77 | -2.50 |
| Iodopentafluoroethane                     | 93.80  | 24.66 | 27.16 | -2.50 |
| Dimethyl bis(2,2-diethylhydrazino)silane  | 246.50 | 71.55 | 69.05 | 2.50  |
| Methyl methacrylate                       | 101.20 | 26.69 | 29.19 | -2.50 |
| Propoxyacetylene                          | 94.60  | 24.88 | 27.38 | -2.50 |
| 1,2-Dimethylbenzene                       | 116.20 | 35.81 | 33.31 | 2.50  |
| alpha-(Chloromethyl)benzenemethanol       | 138.70 | 41.98 | 39.48 | 2.50  |
| 1,3-Divinyl-1,1,3,3-tetramethyldisiloxane | 194.30 | 57.23 | 54.73 | 2.50  |
| 1-Propylcyclopentanol                     | 142.90 | 38.13 | 40.63 | -2.50 |
| 2-Methyl-4-hexanone                       | 130.10 | 34.62 | 37.12 | -2.50 |
| Ethylthiocarbamate                        | 94.70  | 29.91 | 27.41 | 2.50  |
| 4-Decanone                                | 180.30 | 48.39 | 50.89 | -2.50 |
| alpha-Methyl-4-morpholineethanol          | 147.40 | 39.37 | 41.87 | -2.50 |
| 1,3,5-Trifluorobenzene                    | 98.10  | 25.85 | 28.34 | -2.49 |
| Methyl 10-undecenoate                     | 217.90 | 58.71 | 61.20 | -2.49 |
| 2-Ethoxy-3,4-dihydro-2H-pyran             | 131.20 | 34.93 | 37.42 | -2.49 |
| 2-Methyl-1-phenyl-1-propanone             | 151.50 | 45.48 | 42.99 | 2.49  |
| Vinyl acetate                             | 84.70  | 22.18 | 24.67 | -2.49 |
| 3-Methylbutyl 3-chloropropionate          | 170.70 | 45.77 | 48.26 | -2.49 |
| 2,4-Dimethylthiophene                     | 108.90 | 33.79 | 31.31 | 2.48  |
| Diethylacetaldehyde                       | 113.60 | 30.11 | 32.59 | -2.48 |
| Isobutyl chlorocarbonate                  | 121.40 | 32.25 | 34.73 | -2.48 |
| Acrylic acid                              | 67.40  | 17.44 | 19.92 | -2.48 |
| Isopropyl isocyanate                      | 87.30  | 22.90 | 25.38 | -2.48 |
| Chlorotrinitromethane                     | 112.20 | 29.73 | 32.21 | -2.48 |
| 2-Methyl-3-hexanone                       | 129.70 | 34.53 | 37.01 | -2.48 |
| Isopropyl 2-chloropropanoate              | 137.10 | 36.56 | 39.04 | -2.48 |
| Phenyl O-ethyl phosphonic acid            | 155.70 | 46.62 | 44.14 | 2.48  |
| Methyl acrylate                           | 84.30  | 22.08 | 24.56 | -2.48 |
| n-Heptaldehyde                            | 131.00 | 34.89 | 37.37 | -2.48 |
| alpha-Terpinene                           | 153.30 | 45.96 | 43.48 | 2.48  |
| Hexyl propanoate                          | 173.80 | 46.63 | 49.11 | -2.48 |

|                                                  |        |       |       |       |
|--------------------------------------------------|--------|-------|-------|-------|
| Decanenitrile                                    | 179.70 | 48.25 | 50.72 | -2.47 |
| n-Propylmethacrylate                             | 134.60 | 35.88 | 38.35 | -2.47 |
| Diethoxymethylsilane                             | 138.10 | 36.84 | 39.31 | -2.47 |
| 4-Methoxyaniline                                 | 120.50 | 36.96 | 34.49 | 2.47  |
| Formamide                                        | 42.50  | 10.62 | 13.09 | -2.47 |
| 2-Butynedinitrile                                | 70.90  | 18.41 | 20.88 | -2.47 |
| Butyl 2-thiophenecarboxylate                     | 170.20 | 50.59 | 48.12 | 2.47  |
| Ethane                                           | 44.90  | 11.28 | 13.75 | -2.47 |
| 3,6-Dimethyl-3-octanol                           | 184.90 | 49.68 | 52.15 | -2.47 |
| Methyl phenyl propoxyborine                      | 175.20 | 51.96 | 49.49 | 2.47  |
| Methylacetamide                                  | 75.70  | 19.73 | 22.20 | -2.47 |
| N,N-Dimethylpropionamide                         | 109.20 | 28.92 | 31.39 | -2.47 |
| Glycidyl methacrylate                            | 136.90 | 36.52 | 38.99 | -2.47 |
| Tridecanal                                       | 231.10 | 62.36 | 64.82 | -2.46 |
| Cyclohexylacetic acid                            | 144.40 | 38.58 | 41.04 | -2.46 |
| 4-Tolyl dipropoxyborine                          | 231.60 | 67.42 | 64.96 | 2.46  |
| 1-Octadecylphosphine                             | 334.20 | 95.56 | 93.10 | 2.46  |
| 4-Nonanone                                       | 163.60 | 43.85 | 46.31 | -2.46 |
| 2-Ethyl-3-propyl-1,4-dioxane                     | 167.10 | 44.81 | 47.27 | -2.46 |
| 3-(Ethylamino)propionitrile                      | 108.40 | 28.71 | 31.17 | -2.46 |
| Allyltriethoxysilane                             | 206.90 | 55.73 | 58.19 | -2.46 |
| 1-Butyl-3-methylimidazolium<br>tricyanomethanide | 224.00 | 65.33 | 62.88 | 2.45  |
| O-Ethyl 4-methylpentanoic imino ester            | 159.90 | 42.84 | 45.29 | -2.45 |
| Dibutylphosphinic chloride                       | 181.70 | 48.82 | 51.27 | -2.45 |
| Chloro di(1,2,2-trimethylpropoxy)borine          | 256.40 | 69.31 | 71.76 | -2.45 |
| Methylamine                                      | 40.60  | 10.12 | 12.57 | -2.45 |
| 3-Methyldihydro-2,5-furandione                   | 96.60  | 25.48 | 27.93 | -2.45 |
| Ethyl dibutoxysilane                             | 221.10 | 59.63 | 62.08 | -2.45 |
| 4-Acetylmorpholine                               | 124.30 | 33.08 | 35.53 | -2.45 |
| Fluorotriethylsilane                             | 142.60 | 38.10 | 40.55 | -2.45 |
| Butyl butoxy chloroborine                        | 183.90 | 49.43 | 51.88 | -2.45 |
| 2-Butyn-1-ol                                     | 77.40  | 20.22 | 22.67 | -2.45 |
| 2-Amino-1-butanol                                | 98.80  | 26.09 | 28.53 | -2.44 |
| Paramethadione                                   | 140.80 | 37.61 | 40.05 | -2.44 |
| N,N-Diethylbutanamide                            | 158.70 | 42.52 | 44.96 | -2.44 |
| 2-Decanone                                       | 180.50 | 48.50 | 50.94 | -2.44 |
| 1-Bromo-3,3-dichlorobutane                       | 124.40 | 38.00 | 35.56 | 2.44  |
| Tabun                                            | 144.00 | 38.49 | 40.93 | -2.44 |
| 1-Hexyl-3-methylimidazolium<br>tricyanomethanide | 258.10 | 74.67 | 72.23 | 2.44  |
| 3-Decanone                                       | 180.30 | 48.45 | 50.89 | -2.44 |
| 5-Nonanone                                       | 163.20 | 43.76 | 46.20 | -2.44 |
| (Chloromethyl)trichlorosilane                    | 110.20 | 34.10 | 31.66 | 2.44  |
| (3-Chloropropyl)trichlorosilane                  | 143.60 | 43.26 | 40.82 | 2.44  |
| 2,3-Dichloro-1,3-butadiene                       | 95.30  | 30.01 | 27.57 | 2.44  |
| (Dimethylamino)acetonitrile                      | 91.40  | 24.07 | 26.51 | -2.44 |
| 2,2,3,3-Tetramethylbutanoic acid                 | 151.70 | 40.61 | 43.04 | -2.43 |
| Propane                                          | 61.50  | 15.87 | 18.30 | -2.43 |

|                                                                                 |        |       |        |       |
|---------------------------------------------------------------------------------|--------|-------|--------|-------|
| 3-Propoxy-1-propene                                                             | 115.60 | 30.71 | 33.14  | -2.43 |
| Cyclopropanecarboxaldehyde                                                      | 74.00  | 19.30 | 21.73  | -2.43 |
| 1-Chloro-2-butanol                                                              | 101.30 | 26.79 | 29.22  | -2.43 |
| N-Ethyl-1-propanamine                                                           | 107.20 | 28.41 | 30.84  | -2.43 |
| t-Butylphosphine                                                                | 100.10 | 31.32 | 28.89  | 2.43  |
| Ethyl ricinoleate                                                               | 360.00 | 97.75 | 100.18 | -2.43 |
| 5-Methyl-1-heptanol                                                             | 153.20 | 41.03 | 43.46  | -2.43 |
| Ethyl isonitrile                                                                | 63.80  | 16.51 | 18.93  | -2.42 |
| 2-Methyl-3-butyn-2-ol                                                           | 93.80  | 24.74 | 27.16  | -2.42 |
| Isobutyl t-butylether                                                           | 153.70 | 41.17 | 43.59  | -2.42 |
| Dinonyl ether                                                                   | 321.70 | 87.25 | 89.67  | -2.42 |
| Dimethyldibutoxysilane                                                          | 221.00 | 59.63 | 62.05  | -2.42 |
| 2-Phenyl-1-propanol                                                             | 140.30 | 42.34 | 39.92  | 2.42  |
| 2-Propoxymethylthiophene                                                        | 150.00 | 45.00 | 42.58  | 2.42  |
| 3-Methyl-1-pentyn-3-ol                                                          | 110.20 | 29.24 | 31.66  | -2.42 |
| 2-Phenylethylamine                                                              | 127.30 | 38.77 | 36.35  | 2.42  |
| Ricinelaic acid                                                                 | 325.80 | 88.38 | 90.80  | -2.42 |
| Tridecanonitrile                                                                | 229.90 | 62.08 | 64.49  | -2.41 |
| N-Phenylethanolamine                                                            | 137.20 | 41.48 | 39.07  | 2.41  |
| Triethylborane                                                                  | 126.50 | 33.72 | 36.13  | -2.41 |
| 2-Heptanone                                                                     | 130.40 | 34.79 | 37.20  | -2.41 |
| Di-n-octylether                                                                 | 288.30 | 78.10 | 80.51  | -2.41 |
| Diallylsulfoxide                                                                | 124.70 | 38.05 | 35.64  | 2.41  |
| Methylethylphosphinic chloride                                                  | 98.20  | 25.96 | 28.37  | -2.41 |
| Benzo[d]isoxazole                                                               | 105.20 | 32.70 | 30.29  | 2.41  |
| 1-Bromo-2-chloro-1,1,2-trifluoroethane                                          | 92.00  | 24.26 | 26.67  | -2.41 |
| 3-(Butylamino)propionitrile                                                     | 141.80 | 37.92 | 40.33  | -2.41 |
| N,N-Dimethylformamide                                                           | 76.50  | 20.01 | 22.42  | -2.41 |
| Isodecyl acrylate                                                               | 234.80 | 63.43 | 65.84  | -2.41 |
| Butanamide                                                                      | 92.20  | 24.32 | 26.72  | -2.40 |
| Dimethylcyanamide                                                               | 75.50  | 19.74 | 22.14  | -2.40 |
| Propyl 2-thiophenecarboxylate                                                   | 153.50 | 45.94 | 43.54  | 2.40  |
| Allyl methyl ether                                                              | 82.20  | 21.58 | 23.98  | -2.40 |
| Diethylcyanamide                                                                | 107.90 | 28.63 | 31.03  | -2.40 |
| Benzonitrile                                                                    | 100.90 | 31.51 | 29.11  | 2.40  |
| Pentyl nonanoate                                                                | 257.30 | 69.61 | 72.01  | -2.40 |
| 1-Octyl-3-methylimidazolium<br>tricyanomethanide                                | 292.60 | 84.09 | 81.69  | 2.40  |
| Isobutyl isothiocyanate                                                         | 114.40 | 35.21 | 32.81  | 2.40  |
| Ethyl t-butyl ketone                                                            | 129.50 | 34.56 | 36.96  | -2.40 |
| 1,1,1-Chlorodifluoro-4-iodobutane                                               | 126.70 | 38.58 | 36.19  | 2.39  |
| (Diethylamino fluoro oxophosphorus)<br>(bis(dimethylamino) oxophosphorus) oxide | 242.00 | 65.42 | 67.81  | -2.39 |
| Vinyloxirane                                                                    | 74.80  | 19.56 | 21.95  | -2.39 |
| 1,2-Dibromotetrafluoroethane                                                    | 101.00 | 26.75 | 29.14  | -2.39 |
| Methoxyacetyl chloride                                                          | 87.80  | 23.13 | 25.52  | -2.39 |
| Ethyl bis(2,2-diethylhydrazino)silane                                           | 247.70 | 71.76 | 69.38  | 2.38  |
| 2-Chlorobutanoic acid                                                           | 103.50 | 27.44 | 29.82  | -2.38 |
| 1-Hexyn-3-ol                                                                    | 110.50 | 29.36 | 31.74  | -2.38 |

|                                                                  |        |        |        |       |
|------------------------------------------------------------------|--------|--------|--------|-------|
| Octadecyltrichlorosilane                                         | 379.90 | 108.02 | 105.64 | 2.38  |
| Diethyl 1-azepanyl thiophosphate                                 | 232.90 | 67.70  | 65.32  | 2.38  |
| Isopentyl 2-chloropropanoate                                     | 170.50 | 45.82  | 48.20  | -2.38 |
| Acetamide                                                        | 58.90  | 15.21  | 17.59  | -2.38 |
| Methyl vinyl ether                                               | 65.90  | 17.13  | 19.51  | -2.38 |
| Ethyl cyclohexylacetate                                          | 178.70 | 48.07  | 50.45  | -2.38 |
| Cyclopentyl methyl ether                                         | 110.70 | 29.42  | 31.80  | -2.38 |
| 1-Decyl-3-methylimidazolium<br>tricyanomethanide                 | 326.00 | 93.23  | 90.85  | 2.38  |
| 3-Chloro-1-propanol                                              | 84.70  | 22.29  | 24.67  | -2.38 |
| Dimethyl bis(2,2-dimethylhydrazino)silane                        | 181.30 | 53.54  | 51.16  | 2.38  |
| gamma-Octanoic lactone                                           | 144.30 | 38.64  | 41.01  | -2.37 |
| 1,2,4a,5,8,8a-Hexahydro-4,7-dimethyl-1-<br>isopropyl naphthalene | 225.90 | 65.77  | 63.40  | 2.37  |
| 4-(1-Ethylpropyl)pyridine                                        | 159.40 | 47.53  | 45.16  | 2.37  |
| 5-Methyluracil                                                   | 106.70 | 28.33  | 30.70  | -2.37 |
| 2-Propoxyvinyl bis(dibutylamino)<br>phosphorus oxide             | 408.20 | 115.77 | 113.40 | 2.37  |
| Isobutyl butyrate                                                | 156.90 | 42.10  | 44.47  | -2.37 |
| 4-Methoxybenzenemethanamine                                      | 137.00 | 41.38  | 39.01  | 2.37  |
| 2-Chloroethanol                                                  | 68.00  | 17.72  | 20.09  | -2.37 |
| 3-Methyl-3-octanol                                               | 169.50 | 45.56  | 47.93  | -2.37 |
| 2-Methyl-2-pentadecanol                                          | 287.00 | 77.79  | 80.16  | -2.37 |
| beta-Ionol                                                       | 210.40 | 61.51  | 59.15  | 2.36  |
| Isobutyl methyl ketone                                           | 113.60 | 30.23  | 32.59  | -2.36 |
| 2-(1-Hydroxyethyl)-thiophene                                     | 117.40 | 36.00  | 33.64  | 2.36  |
| Ethylisopropylether                                              | 104.30 | 27.68  | 30.04  | -2.36 |
| Lauroitrile                                                      | 213.20 | 57.55  | 59.91  | -2.36 |
| Dodecamethylpentasiloxane                                        | 368.20 | 104.79 | 102.43 | 2.36  |
| 2-(Chloromethyl)-2-methyloxirane                                 | 94.70  | 25.05  | 27.41  | -2.36 |
| Epichlorohydrin                                                  | 78.00  | 20.47  | 22.83  | -2.36 |
| 3-Tolyl dibutoxyborine                                           | 265.00 | 76.48  | 74.12  | 2.36  |
| 1,2-Dichloro-1,3-butadiene                                       | 95.40  | 29.96  | 27.60  | 2.36  |
| Cyclobutanol                                                     | 78.10  | 20.50  | 22.86  | -2.36 |
| Phenyl O-octyl phosphonic acid                                   | 255.90 | 73.98  | 71.62  | 2.36  |
| Tetradecanoic anhydride                                          | 492.80 | 134.25 | 136.60 | -2.35 |
| n-Butylmethacrylate                                              | 151.40 | 40.61  | 42.96  | -2.35 |
| 1-Butylpyridinium 2-acryloamido-2-<br>methylpropanesulfonate     | 318.00 | 91.01  | 88.66  | 2.35  |
| Tetrahydropyran                                                  | 93.50  | 24.73  | 27.08  | -2.35 |
| Diisobutylphosphinic chloride                                    | 181.00 | 48.73  | 51.08  | -2.35 |
| 3-(Propylamino)propionitrile                                     | 125.10 | 33.40  | 35.75  | -2.35 |
| 4-Chloro-1-butanol                                               | 101.40 | 26.90  | 29.25  | -2.35 |
| 2-Chloroethylsulfonyl fluoride                                   | 96.00  | 25.42  | 27.77  | -2.35 |
| Butyl isocyanate                                                 | 104.20 | 27.67  | 30.02  | -2.35 |
| N-Methylpropionamide                                             | 92.30  | 24.41  | 26.75  | -2.34 |
| Chloromethylchloroformate                                        | 85.70  | 22.60  | 24.94  | -2.34 |
| Caproic acid                                                     | 184.10 | 49.59  | 51.93  | -2.34 |
| gamma-Caprolactone                                               | 112.20 | 29.87  | 32.21  | -2.34 |
| 2-Tolyl dipropoxyborine                                          | 230.40 | 66.97  | 64.63  | 2.34  |

|                                               |        |       |       |       |
|-----------------------------------------------|--------|-------|-------|-------|
| 1-Bromo-3-methylcyclohexane                   | 135.50 | 40.94 | 38.60 | 2.34  |
| trans-Citral                                  | 166.20 | 49.36 | 47.02 | 2.34  |
| Ethoxyacetylchloride                          | 104.60 | 27.79 | 30.13 | -2.34 |
| 1,1-Chloroiodo-2,2-difluoroethylene           | 88.20  | 27.96 | 25.63 | 2.33  |
| 1-Propylamine                                 | 74.00  | 19.40 | 21.73 | -2.33 |
| t-Butylformamide                              | 109.40 | 29.11 | 31.44 | -2.33 |
| 1,3-Bis(1-methyl-4-piperidyl)propane          | 262.00 | 75.63 | 73.30 | 2.33  |
| Phenyl O-isobutyl phosphonic acid             | 188.10 | 55.36 | 53.03 | 2.33  |
| 3-Methyl-2-pentanone                          | 112.20 | 29.88 | 32.21 | -2.33 |
| 2-Nitroacetophenone                           | 140.60 | 42.33 | 40.00 | 2.33  |
| 3-Pentyn-1-ol                                 | 94.00  | 24.89 | 27.22 | -2.33 |
| Bromotrimethylsilane                          | 106.30 | 32.92 | 30.59 | 2.33  |
| 1-Chloro-1-nitropropane                       | 98.70  | 26.18 | 28.51 | -2.33 |
| N,N-Dimethylpentanamide                       | 142.30 | 38.14 | 40.47 | -2.33 |
| 3-Chloropropionitrile                         | 77.00  | 20.23 | 22.56 | -2.33 |
| 3-Anisaldehyde                                | 128.30 | 38.95 | 36.63 | 2.32  |
| O-Ethyl hexanoic imino ester                  | 159.90 | 42.97 | 45.29 | -2.32 |
| Diisopropyl ether                             | 119.20 | 31.81 | 34.13 | -2.32 |
| Butyl vinyl ether                             | 116.10 | 30.96 | 33.28 | -2.32 |
| 3-(Pentylamino)propionitrile                  | 158.50 | 42.59 | 44.91 | -2.32 |
| Butyl 2-(2,3-dihydroxypropoxy)ethyl thioether | 207.90 | 56.14 | 58.46 | -2.32 |
| 1,2-Bis(2-chloroethoxy)ethane                 | 159.30 | 42.81 | 45.13 | -2.32 |
| 1-Chloro-2-propanol                           | 84.70  | 22.35 | 24.67 | -2.32 |
| 2-((2-Methylphenyl)amino)ethanol              | 153.30 | 45.80 | 43.48 | 2.32  |
| Allyl bromide                                 | 74.30  | 24.13 | 21.81 | 2.32  |
| Allyl alcohol                                 | 65.10  | 16.98 | 19.29 | -2.31 |
| 3-Chloropentanoic acid                        | 118.80 | 31.71 | 34.02 | -2.31 |
| Arachidic acid                                | 356.80 | 96.99 | 99.30 | -2.31 |
| Cyclohexanol                                  | 109.50 | 29.16 | 31.47 | -2.31 |
| 1,3-Bis(chloromethyl)tetramethyldisiloxane    | 198.90 | 58.30 | 55.99 | 2.31  |
| 2,2-Dimethyl-3-ethylpentane                   | 159.70 | 42.93 | 45.24 | -2.31 |
| 3,4-Dimethyl-1,2,5-oxadiazole                 | 89.80  | 23.76 | 26.07 | -2.31 |
| Dimethyl sulfone                              | 77.80  | 20.47 | 22.77 | -2.30 |
| Diisoamylbutylthioborane                      | 278.00 | 79.99 | 77.69 | 2.30  |
| Methylisobutylphosphinic chloride             | 131.20 | 35.12 | 37.42 | -2.30 |
| Isobutyl acrylate                             | 134.70 | 36.08 | 38.38 | -2.30 |
| 3-Tolyl dipropoxyborine                       | 231.60 | 67.26 | 64.96 | 2.30  |
| 3-(Methylamino)propionitrile                  | 91.60  | 24.26 | 26.56 | -2.30 |
| 1-Hexadecylphosphine                          | 300.80 | 86.24 | 83.94 | 2.30  |
| Aspon                                         | 330.70 | 94.44 | 92.14 | 2.30  |
| 1-Methoxy-4-propylbenzene                     | 158.00 | 47.07 | 44.77 | 2.30  |
| Methyl 3-hexenoate                            | 133.70 | 35.81 | 38.11 | -2.30 |
| 2-Methylbutyl acrylate                        | 151.20 | 40.61 | 42.91 | -2.30 |
| 1,2-Dichloro-1,2-difluoroethene               | 77.80  | 20.48 | 22.77 | -2.29 |
| 2-Methyl-3-pentenoic acid                     | 116.70 | 31.15 | 33.44 | -2.29 |
| 2-Undecanone                                  | 197.20 | 53.23 | 55.52 | -2.29 |
| 4-Diethylamino-2-butanol                      | 163.50 | 43.99 | 46.28 | -2.29 |
| Propylnitramine                               | 97.40  | 25.86 | 28.15 | -2.29 |

|                                             |        |        |        |       |
|---------------------------------------------|--------|--------|--------|-------|
| 1-Phenyl-1-butanol                          | 155.70 | 46.43  | 44.14  | 2.29  |
| Caprylic aldehyde                           | 147.70 | 39.66  | 41.95  | -2.29 |
| Isobutyl methacrylate                       | 151.20 | 40.62  | 42.91  | -2.29 |
| Tetramethylurea                             | 120.50 | 32.20  | 34.49  | -2.29 |
| Neral                                       | 166.90 | 49.50  | 47.21  | 2.29  |
| Cyclopropanecarbonitrile                    | 72.70  | 19.09  | 21.38  | -2.29 |
| Phenyl O-heptyl phosphonic acid             | 239.20 | 69.33  | 67.04  | 2.29  |
| 2-Phenoxypropanoyl chloride                 | 158.30 | 47.14  | 44.85  | 2.29  |
| Tetrahydromyrcenol                          | 185.90 | 50.14  | 52.43  | -2.29 |
| 2-Chloropentanoic acid                      | 119.80 | 32.01  | 34.29  | -2.28 |
| Divinyl sulfide                             | 86.70  | 27.50  | 25.22  | 2.28  |
| alpha-Allylbenzenemethanol                  | 152.40 | 45.52  | 43.24  | 2.28  |
| 1-Chloro-1-nitroethane                      | 82.20  | 21.70  | 23.98  | -2.28 |
| 3-Tolyl diethoxyborine                      | 198.20 | 58.08  | 55.80  | 2.28  |
| n-Nonanal                                   | 164.30 | 44.22  | 46.50  | -2.28 |
| 5-Methyl-2(5H)-furanone                     | 91.20  | 24.17  | 26.45  | -2.28 |
| Ethyl vinyl ether                           | 82.70  | 21.84  | 24.12  | -2.28 |
| 3-Nitrotoluene                              | 123.30 | 37.53  | 35.25  | 2.28  |
| Methyl bis(2,2-diethylhydrazino)silane      | 231.40 | 67.18  | 64.90  | 2.28  |
| Dodecanoic anhydride                        | 424.70 | 115.65 | 117.92 | -2.27 |
| 2-Anisaldehyde                              | 128.20 | 38.87  | 36.60  | 2.27  |
| n-Propyliodoacetate                         | 131.30 | 39.72  | 37.45  | 2.27  |
| 3,4-Dihydro-1H-2-benzopyran                 | 131.30 | 39.72  | 37.45  | 2.27  |
| Thiophene                                   | 75.30  | 24.36  | 22.09  | 2.27  |
| Hexyl methacrylate                          | 184.90 | 49.88  | 52.15  | -2.27 |
| Ethylxanthogenamide                         | 95.50  | 29.90  | 27.63  | 2.27  |
| 2,3-Lutidine                                | 111.00 | 34.15  | 31.88  | 2.27  |
| 3-Hexyn-1-ol                                | 110.70 | 29.53  | 31.80  | -2.27 |
| 1-Phenyl-3-hexanone                         | 184.10 | 54.20  | 51.93  | 2.27  |
| Propylenediamine                            | 85.10  | 22.51  | 24.78  | -2.27 |
| 2,2,4-Trimethyl-3-pentanone                 | 145.40 | 39.05  | 41.32  | -2.27 |
| 3-Ethyl-6-nonanone                          | 195.20 | 52.71  | 54.98  | -2.27 |
| 3-Methylcyclopentanol                       | 110.10 | 29.37  | 31.63  | -2.26 |
| 2-Butyl-3-ethyl-5-propylthiophane           | 233.70 | 67.80  | 65.54  | 2.26  |
| 3-Ethyl-4-methylhexane                      | 160.30 | 43.14  | 45.40  | -2.26 |
| Butyl-di(3-hydroxypropyl)phosphine thioxide | 234.40 | 67.99  | 65.73  | 2.26  |
| alpha-Pinene                                | 146.80 | 43.96  | 41.70  | 2.26  |
| 1(3H)-Isobenzofuranone                      | 117.60 | 35.95  | 33.69  | 2.26  |
| Hexadecyl acetate                           | 324.20 | 88.10  | 90.36  | -2.26 |
| 2-Pentyn-1-ol                               | 94.00  | 24.96  | 27.22  | -2.26 |
| Hexane                                      | 111.50 | 29.76  | 32.02  | -2.26 |
| Diethyl butoxymethyl phosphine oxide        | 201.00 | 54.31  | 56.57  | -2.26 |
| 4-Chlorobutanoic acid                       | 103.80 | 27.65  | 29.91  | -2.26 |
| Dibutyl O-butyl phosphorus oxide            | 248.10 | 67.23  | 69.49  | -2.26 |
| 4-Phenyl-2-butanone                         | 150.90 | 45.08  | 42.83  | 2.25  |
| 4-t-Butylphenol                             | 157.50 | 46.89  | 44.64  | 2.25  |
| n-Crotylacetate                             | 117.10 | 31.30  | 33.55  | -2.25 |
| trans-2-Pentenoic acid                      | 100.80 | 26.83  | 29.08  | -2.25 |
| 3-Methylhexane                              | 127.70 | 34.21  | 36.46  | -2.25 |

|                                                     |        |       |       |       |
|-----------------------------------------------------|--------|-------|-------|-------|
| 1-(2-Furyl)-2-oxa-4-butyl acetate                   | 179.10 | 48.31 | 50.56 | -2.25 |
| Dichloro propoxyborine                              | 114.60 | 30.62 | 32.87 | -2.25 |
| trans-2-Hexen-1-ol, acetate                         | 151.20 | 40.66 | 42.91 | -2.25 |
| 1-Ethyl-3-methylimidazolium<br>methanesulfonate     | 179.60 | 48.45 | 50.70 | -2.25 |
| 1-Methylcyclopentanol                               | 110.00 | 29.36 | 31.61 | -2.25 |
| 1-Butyl-2-pyridone                                  | 153.20 | 45.70 | 43.46 | 2.24  |
| Phenylacetaldehyde                                  | 117.40 | 35.88 | 33.64 | 2.24  |
| 6-Methyl-4-octanone                                 | 162.70 | 43.82 | 46.06 | -2.24 |
| 4-Tolyl diethoxyborine                              | 198.20 | 58.04 | 55.80 | 2.24  |
| 1-(1-Hydroxycyclohexyl)ethanone                     | 143.30 | 38.50 | 40.74 | -2.24 |
| 2,4-Dimethyl-1,3-pentadiene                         | 112.20 | 34.45 | 32.21 | 2.24  |
| 4-Isopropyl-2-propylthiophane                       | 184.50 | 54.28 | 52.04 | 2.24  |
| 2-Decyn-1-ol                                        | 177.60 | 47.91 | 50.15 | -2.24 |
| 3,5,5-Trimethyl-1-hexanol                           | 167.90 | 45.25 | 47.49 | -2.24 |
| 1,4-Bis(dichloroboryl)butane                        | 164.50 | 48.79 | 46.56 | 2.23  |
| 2-(4-Ethylphenyl)ethanol                            | 156.70 | 46.65 | 44.42 | 2.23  |
| Isopropyl salicylate                                | 168.70 | 49.94 | 47.71 | 2.23  |
| 2-Propylcyclohexanone                               | 152.20 | 40.95 | 43.18 | -2.23 |
| Benzylethylamine                                    | 144.90 | 43.41 | 41.18 | 2.23  |
| 1-Phenyl-3-pentanone                                | 167.40 | 49.58 | 47.35 | 2.23  |
| 2-Chloropyridine                                    | 93.10  | 29.20 | 26.97 | 2.23  |
| Isopentyl salicylate                                | 201.50 | 58.93 | 56.70 | 2.23  |
| Ethyl 2-acetyl-4-pentenoate                         | 167.70 | 45.21 | 47.43 | -2.22 |
| Butylacetamide                                      | 126.10 | 33.80 | 36.02 | -2.22 |
| 2,5-Dimethylheptane                                 | 161.50 | 43.51 | 45.73 | -2.22 |
| N-Benzyl-N-ethylhydroxylamine                       | 153.50 | 45.76 | 43.54 | 2.22  |
| 2-Butoxyvinyl bis(diethylamino) phosphorus<br>oxide | 291.40 | 83.58 | 81.36 | 2.22  |
| 4-t-Butylpyridine                                   | 144.00 | 43.15 | 40.93 | 2.22  |
| 3-Nonenoic acid                                     | 166.80 | 44.97 | 47.19 | -2.22 |
| Pinacolone                                          | 112.40 | 30.05 | 32.27 | -2.22 |
| Ethyl 2-thiophenecarboxylate                        | 136.80 | 41.17 | 38.96 | 2.21  |
| 5-Decyn-1-ol                                        | 177.50 | 47.91 | 50.12 | -2.21 |
| alpha,alpha-Dichloroacetoacetic acid<br>ethylester  | 153.40 | 41.30 | 43.51 | -2.21 |
| Bromodichloromethane                                | 74.90  | 24.19 | 21.98 | 2.21  |
| 7-Chloro-1-heptanol                                 | 151.50 | 40.78 | 42.99 | -2.21 |
| 6-Chloro-1-hexanol                                  | 134.80 | 36.20 | 38.41 | -2.21 |
| Cycloheptanol                                       | 125.50 | 33.65 | 35.86 | -2.21 |
| 1,1-Dichloro-1-fluoroethane                         | 78.10  | 20.65 | 22.86 | -2.21 |
| Butoxy bis(ethylamino)borane                        | 195.20 | 52.77 | 54.98 | -2.21 |
| 1-Butylamine                                        | 90.60  | 24.08 | 26.29 | -2.21 |
| 2-(Diethoxymethyl)furan                             | 168.40 | 45.42 | 47.63 | -2.21 |
| 7-Oxabicyclo[4.1.0]heptane                          | 102.70 | 27.40 | 29.60 | -2.20 |
| Ethyl linolenate                                    | 335.90 | 95.77 | 93.57 | 2.20  |
| Di-t-butyl ether                                    | 151.40 | 40.76 | 42.96 | -2.20 |
| (Diethylamino)acetonitrile                          | 123.80 | 33.19 | 35.39 | -2.20 |
| Cyclohexyl acetate                                  | 144.50 | 38.87 | 41.07 | -2.20 |
| Morpholine                                          | 88.90  | 23.62 | 25.82 | -2.20 |



|                                                |        |       |       |       |
|------------------------------------------------|--------|-------|-------|-------|
| 3-Hydroxyacetophenone                          | 127.30 | 38.55 | 36.35 | 2.20  |
| 1-t-Butyl-4-methoxybenzene                     | 224.10 | 65.10 | 62.90 | 2.20  |
| Methylbenzene                                  | 100.00 | 31.06 | 28.86 | 2.20  |
| Pentane                                        | 94.90  | 25.27 | 27.47 | -2.20 |
| Tetrahydrofurfurylamine                        | 105.40 | 28.15 | 30.35 | -2.20 |
| Butane                                         | 78.20  | 20.69 | 22.88 | -2.19 |
| 2,6-Dimethylcyclohexanone                      | 135.40 | 36.38 | 38.57 | -2.19 |
| trans-4-Methylcyclohexanol                     | 126.10 | 33.83 | 36.02 | -2.19 |
| Octafluoronaphthalene                          | 165.00 | 44.50 | 46.69 | -2.19 |
| 3-Methylpentane                                | 111.40 | 29.80 | 31.99 | -2.19 |
| 3-(Hexylamino)propionitrile                    | 175.20 | 47.30 | 49.49 | -2.19 |
| 4-Ethyl-2-propylthiophane                      | 168.60 | 49.87 | 47.68 | 2.19  |
| Methylnitroamine                               | 64.00  | 16.80 | 18.99 | -2.19 |
| N,N-Diethylpropanamide                         | 141.80 | 38.14 | 40.33 | -2.19 |
| N,N'-Diethyl-1,2-ethanediamine                 | 136.00 | 36.55 | 38.74 | -2.19 |
| Ethyl bromofluorophosphate                     | 104.90 | 28.02 | 30.21 | -2.19 |
| Hydrocinnamionitrile                           | 133.50 | 40.24 | 38.05 | 2.19  |
| Trimethylphosphite                             | 109.20 | 29.20 | 31.39 | -2.19 |
| 2-Chloroisopropylacetate                       | 120.10 | 32.19 | 34.38 | -2.19 |
| 1-Ethyl-4-methoxybenzene                       | 141.60 | 42.46 | 40.27 | 2.19  |
| 3-Dimethylamino-1-propanol                     | 115.50 | 30.93 | 33.12 | -2.19 |
| Isopropylsulfonic acid                         | 101.90 | 27.20 | 29.39 | -2.19 |
| Triptane                                       | 127.20 | 34.14 | 36.32 | -2.18 |
| Triethyl phosphite                             | 159.50 | 43.00 | 45.18 | -2.18 |
| 9-Decyn-1-ol                                   | 177.40 | 47.91 | 50.09 | -2.18 |
| 1-Ethyl-3-methylimidazolium<br>tricyanomethide | 190.50 | 55.87 | 53.69 | 2.18  |
| Diethyl isopropylidenemalonate                 | 193.00 | 52.19 | 54.37 | -2.18 |
| 3-Ethylpentane                                 | 127.70 | 34.28 | 36.46 | -2.18 |
| Cyclohexaneethanol                             | 142.50 | 38.34 | 40.52 | -2.18 |
| 4-Penten-2-ol                                  | 98.20  | 26.19 | 28.37 | -2.18 |
| 2-Chloroethyl ethyl ether                      | 102.10 | 27.26 | 29.44 | -2.18 |
| Furfuryl propionate                            | 144.50 | 38.89 | 41.07 | -2.18 |
| Dill-Apiole                                    | 202.80 | 59.24 | 57.06 | 2.18  |
| 2-Methyl-4-heptanone                           | 145.30 | 39.11 | 41.29 | -2.18 |
| 2-Methyloxazoline                              | 83.10  | 22.05 | 24.23 | -2.18 |
| Diethyl butoxy phosphorus thioxide             | 193.80 | 56.77 | 54.59 | 2.18  |
| 4,5-Dihydro-2-methylthiazole                   | 91.90  | 28.82 | 26.64 | 2.18  |
| Nikethamide                                    | 174.70 | 51.53 | 49.35 | 2.18  |
| 2,3-Dimethylpentane                            | 127.90 | 34.34 | 36.52 | -2.18 |
| 2-Chloro-1-butanol                             | 101.10 | 26.99 | 29.17 | -2.18 |
| 2,3-Dimercapto-1-propanol                      | 106.90 | 32.93 | 30.76 | 2.17  |
| cis-3-Methylcyclohexanol                       | 126.10 | 33.85 | 36.02 | -2.17 |
| Acetic acid 3-chloropropylester                | 121.10 | 32.48 | 34.65 | -2.17 |
| alpha-Methylcyclohexanemethanol                | 142.10 | 38.24 | 40.41 | -2.17 |
| 4-Methylbenzeneacetonitrile                    | 133.20 | 40.14 | 37.97 | 2.17  |
| (Chloromethoxy)ethane                          | 85.40  | 22.69 | 24.86 | -2.17 |
| Ethyl 2-butyrate                               | 113.80 | 30.48 | 32.65 | -2.17 |
| Ethylphenylphosphinic chloride                 | 152.20 | 45.35 | 43.18 | 2.17  |

|                                             |        |       |       |       |
|---------------------------------------------|--------|-------|-------|-------|
| 3,3-Dimethyl-2-butylamine                   | 122.00 | 32.73 | 34.90 | -2.17 |
| 2-Nonanone                                  | 162.90 | 43.95 | 46.12 | -2.17 |
| 2-Ethoxymethylthiophene                     | 133.40 | 40.19 | 38.03 | 2.16  |
| 3-Ethylhexane                               | 144.70 | 38.96 | 41.12 | -2.16 |
| Dibromoacetonitrile                         | 82.80  | 26.31 | 24.15 | 2.16  |
| 2-Furanmethanethiol                         | 101.00 | 31.30 | 29.14 | 2.16  |
| 2-Vinylfuran                                | 93.60  | 29.27 | 27.11 | 2.16  |
| Methyl crotonate                            | 101.30 | 27.06 | 29.22 | -2.16 |
| Chloro(dichloromethyl)dimethylsilane        | 130.50 | 39.39 | 37.23 | 2.16  |
| Dibutyl thiophosphoryl chloride             | 215.90 | 62.81 | 60.65 | 2.16  |
| 3-Methoxybenzonitrile                       | 126.80 | 38.37 | 36.21 | 2.16  |
| 1,1-Dibromopropane                          | 98.00  | 30.47 | 28.32 | 2.15  |
| Terpinolene                                 | 152.80 | 45.50 | 43.35 | 2.15  |
| Pentaerythritol tetrakis(2-mercaptoacetate) | 348.00 | 99.04 | 96.89 | 2.15  |
| Ethyl iodoacetate                           | 114.90 | 35.10 | 32.95 | 2.15  |
| Dimethyldiheptoxysilane                     | 320.70 | 87.25 | 89.40 | -2.15 |
| trans-2-Hexen-1-ol                          | 114.60 | 30.72 | 32.87 | -2.15 |
| 2,3,3,4-Tetramethylpentane                  | 160.10 | 43.20 | 45.35 | -2.15 |
| Diethyl bis(2,2-dimethylhydrazino)silane    | 214.70 | 62.47 | 60.32 | 2.15  |
| 1,3-Bis(dichloroboryl)propane               | 147.80 | 44.12 | 41.97 | 2.15  |
| 2,3,3-Trimethylpentane                      | 143.90 | 38.76 | 40.91 | -2.15 |
| trans-Chlorobromoethylene                   | 72.30  | 23.41 | 21.27 | 2.14  |
| Acetone oxime                               | 75.90  | 20.11 | 22.25 | -2.14 |
| Methylcyclopropylketone                     | 89.90  | 23.95 | 26.09 | -2.14 |
| cis-2-Methylcyclohexanol                    | 125.30 | 33.66 | 35.80 | -2.14 |
| Benzylamine                                 | 111.90 | 34.27 | 32.13 | 2.14  |
| Dibromochlorofluoromethane                  | 83.90  | 26.59 | 24.45 | 2.14  |
| 10-Chloro-1-decanol                         | 201.60 | 54.59 | 56.73 | -2.14 |
| Bis(2-bromoethyl) ether                     | 124.70 | 37.78 | 35.64 | 2.14  |
| 4-Chlorophenol                              | 106.40 | 32.76 | 30.62 | 2.14  |
| Dibutylamine                                | 157.30 | 42.44 | 44.58 | -2.14 |
| R-11                                        | 194.60 | 56.95 | 54.81 | 2.14  |
| 4-Methyl-1-heptanol                         | 153.20 | 41.32 | 43.46 | -2.14 |
| 1-Cyclohexene-1-carboxylic acid             | 122.50 | 32.90 | 35.04 | -2.14 |
| Tetrabutylphosphonium acetate               | 357.00 | 97.22 | 99.36 | -2.14 |
| Fichtelite                                  | 289.70 | 83.03 | 80.90 | 2.13  |
| Methyl bis(diethylamino)silane              | 205.70 | 59.99 | 57.86 | 2.13  |
| Bromotriethylsilane                         | 156.30 | 46.44 | 44.31 | 2.13  |
| Nitrobenzene                                | 106.90 | 32.89 | 30.76 | 2.13  |
| Propanal oxime                              | 76.70  | 20.34 | 22.47 | -2.13 |
| 2',5'-Dimethoxyacetophenone                 | 169.10 | 49.95 | 47.82 | 2.13  |
| Cyclopropylamine                            | 66.60  | 17.57 | 19.70 | -2.13 |
| Methyl 2,3-dibromopropanoate                | 126.30 | 38.21 | 36.08 | 2.13  |
| 1-Chloro-2-methoxyethane                    | 85.30  | 22.70 | 24.83 | -2.13 |
| 5-Methyl-2(3H)-furanone                     | 90.80  | 24.21 | 26.34 | -2.13 |
| 2,2-Diethyl-5-propylthiophane               | 200.50 | 58.56 | 56.43 | 2.13  |
| Ethyl hydrosorbate                          | 150.70 | 40.64 | 42.77 | -2.13 |
| Phenyl chloroacetate                        | 140.60 | 42.13 | 40.00 | 2.13  |
| Isopropyl methacrylate                      | 134.00 | 36.06 | 38.19 | -2.13 |

|                                              |        |        |        |       |
|----------------------------------------------|--------|--------|--------|-------|
| Allyl benzoate                               | 156.50 | 46.49  | 44.36  | 2.13  |
| 6-Methyl-2-heptanone                         | 146.50 | 39.49  | 41.62  | -2.13 |
| 1-Phenyl-2-methyl-2-propanol                 | 156.40 | 46.46  | 44.33  | 2.13  |
| Methyl chlorosulfonate                       | 82.80  | 22.02  | 24.15  | -2.13 |
| 2-Pyrrolidone                                | 81.30  | 21.61  | 23.73  | -2.12 |
| 1,2,3-Trichloropropene                       | 98.00  | 30.44  | 28.32  | 2.12  |
| 2-Hexenoic acid                              | 117.50 | 31.54  | 33.66  | -2.12 |
| 2-Undecylthiacyclohexane                     | 285.70 | 81.92  | 79.80  | 2.12  |
| 2,4,6-Collidine                              | 127.80 | 38.61  | 36.49  | 2.12  |
| N-Nitrosodimethylamine                       | 72.90  | 19.31  | 21.43  | -2.12 |
| Hexanophenone                                | 185.30 | 54.38  | 52.26  | 2.12  |
| 5-Hexyn-2-one                                | 103.70 | 27.76  | 29.88  | -2.12 |
| 2-Hydroxybenzonitrile                        | 109.80 | 33.67  | 31.55  | 2.12  |
| 2-Ethylhexyl acrylate                        | 201.00 | 54.45  | 56.57  | -2.12 |
| 4-Chlorobutyronitrile                        | 93.70  | 25.02  | 27.14  | -2.12 |
| 2-Isopropyl-p-cresol                         | 157.10 | 46.64  | 44.53  | 2.11  |
| 1-Docosanoic acid                            | 390.20 | 106.35 | 108.46 | -2.11 |
| Cyclobutane                                  | 69.00  | 18.25  | 20.36  | -2.11 |
| 1,1-Difluoro-1,2,2-trichloroethane           | 97.00  | 25.93  | 28.04  | -2.11 |
| ((Chloromethoxy)methyl)benzene               | 139.80 | 41.89  | 39.78  | 2.11  |
| 2-Methyl-1-heptanol                          | 153.50 | 41.43  | 43.54  | -2.11 |
| 2-Propylpyrrole                              | 118.70 | 36.10  | 33.99  | 2.11  |
| 2,5-Aldehydine                               | 127.60 | 38.54  | 36.43  | 2.11  |
| 1-Ethyl-3-methylimidazolium taurinate        | 208.10 | 56.41  | 58.51  | -2.10 |
| 1-Hexyl-3-methylimidazolium dicyanoamide     | 247.40 | 67.19  | 69.29  | -2.10 |
| 3-Methoxyacetophenone                        | 144.60 | 43.20  | 41.10  | 2.10  |
| trans-2-Methylcyclohexanol                   | 126.10 | 33.92  | 36.02  | -2.10 |
| Acetic acid 1,3-dichloroisopropylester       | 134.30 | 36.17  | 38.27  | -2.10 |
| 4-Chloro-1-(4-fluorophenyl)-1-butanone       | 171.00 | 50.44  | 48.34  | 2.10  |
| Cyclopentanecarboxaldehyde                   | 103.70 | 27.78  | 29.88  | -2.10 |
| Isopropylphenylether                         | 141.70 | 42.40  | 40.30  | 2.10  |
| Hexadecanenitrile                            | 279.90 | 76.11  | 78.21  | -2.10 |
| 1-(2-Furyl)-2-oxa-4-butanol                  | 133.30 | 35.90  | 38.00  | -2.10 |
| 2-Tridecanone                                | 230.60 | 62.59  | 64.69  | -2.10 |
| 2-Ethylhexanal                               | 147.00 | 39.66  | 41.76  | -2.10 |
| trans-2-Octenoic acid                        | 150.90 | 40.73  | 42.83  | -2.10 |
| (9Z)-Octadecenoic acid                       | 317.00 | 86.29  | 88.38  | -2.09 |
| 2-Ethoxythiophene                            | 117.40 | 35.73  | 33.64  | 2.09  |
| Acetaldoxime                                 | 59.60  | 15.69  | 17.78  | -2.09 |
| Cumic alcohol                                | 157.00 | 46.59  | 44.50  | 2.09  |
| 2-Chloro-1-propanol                          | 84.60  | 22.55  | 24.64  | -2.09 |
| 2-Thiophenemethanol                          | 100.90 | 31.20  | 29.11  | 2.09  |
| Hexapropyldisiloxane                         | 366.50 | 104.05 | 101.96 | 2.09  |
| 1,3-Cyclohexanedione                         | 105.00 | 28.15  | 30.24  | -2.09 |
| 2-(1-Iodoethyl)-1,3-dioxolane-4-methanol     | 153.20 | 45.54  | 43.46  | 2.08  |
| 1-Propyronitrile-3-butyylimidazolium bromide | 215.40 | 62.60  | 60.52  | 2.08  |
| Eucarvone                                    | 159.40 | 47.24  | 45.16  | 2.08  |
| 1-Phenylpropargyl alcohol                    | 131.40 | 39.56  | 37.48  | 2.08  |

|                                             |        |       |       |       |
|---------------------------------------------|--------|-------|-------|-------|
| 2,2,3,3-Tetramethylbutane                   | 143.20 | 38.63 | 40.71 | -2.08 |
| Bis(3-aminopropyl)amine                     | 147.50 | 39.81 | 41.89 | -2.08 |
| 2-s-Butylphenol                             | 157.00 | 46.58 | 44.50 | 2.08  |
| 4,4-Dimethyl-2-pentanone                    | 128.10 | 34.49 | 36.57 | -2.08 |
| 3-Methylbenzoic acid                        | 127.80 | 38.57 | 36.49 | 2.08  |
| 1-Tetradecylphosphine                       | 267.40 | 76.86 | 74.78 | 2.08  |
| 1-(Chloromethoxy)propane                    | 102.10 | 27.36 | 29.44 | -2.08 |
| 4-Methylene-1-isopropylcyclohexene          | 154.20 | 45.81 | 43.73 | 2.08  |
| 4-Piperidineethanol                         | 137.90 | 37.18 | 39.26 | -2.08 |
| 1,1,2,2,3-Pentachloropropane                | 131.60 | 39.61 | 37.53 | 2.08  |
| 4-Ethoxyaniline                             | 137.40 | 41.20 | 39.12 | 2.08  |
| Valeramide                                  | 108.80 | 29.20 | 31.28 | -2.08 |
| 2-Hexylthiacyclohexane                      | 202.30 | 59.00 | 56.92 | 2.08  |
| 1-(Chloromethyl)-2-fluorobenzene            | 117.90 | 35.85 | 33.77 | 2.08  |
| 3-Methyl-3-buten-2-ol                       | 97.20  | 26.02 | 28.10 | -2.08 |
| 4-(1-Butylpentyl)pyridine                   | 228.70 | 66.24 | 64.16 | 2.08  |
| 4-Ethoxytoluene                             | 142.30 | 42.54 | 40.47 | 2.07  |
| Ethyl phenylglyoxylate                      | 162.90 | 48.19 | 46.12 | 2.07  |
| Methylcyclohexylether                       | 126.50 | 34.06 | 36.13 | -2.07 |
| 4-Nonylphenol                               | 241.40 | 69.72 | 67.65 | 2.07  |
| Phenyl O-isopropyl phosphonic acid          | 171.40 | 50.52 | 48.45 | 2.07  |
| 10-Undecenoic acid                          | 200.80 | 54.44 | 56.51 | -2.07 |
| 1-Penten-3-ol                               | 97.80  | 26.19 | 28.26 | -2.07 |
| Diisoamyl phthalate                         | 302.00 | 86.34 | 84.27 | 2.07  |
| n-Butyl acrylate                            | 134.80 | 36.34 | 38.41 | -2.07 |
| trans-5-Octenoic acid                       | 149.60 | 40.40 | 42.47 | -2.07 |
| Solanone                                    | 216.70 | 62.94 | 60.87 | 2.07  |
| 2,4-Dimethylthiazole                        | 103.90 | 32.00 | 29.93 | 2.07  |
| 3-Ethyl-3-methylpentane                     | 143.50 | 38.73 | 40.80 | -2.07 |
| Isobutyl salicylate                         | 185.90 | 54.49 | 52.43 | 2.06  |
| Di-n-propylsulfone                          | 144.30 | 38.95 | 41.01 | -2.06 |
| 1-Propyronitrile-3-hexylimidazolium bromide | 248.80 | 71.74 | 69.68 | 2.06  |
| Hexyloxybenzene                             | 192.80 | 56.38 | 54.32 | 2.06  |
| 3,3-Dimethylpentane                         | 127.40 | 34.32 | 36.38 | -2.06 |
| Ethyl crotonate                             | 118.10 | 31.77 | 33.83 | -2.06 |
| 1,1,3,3-Tetramethylguanidinium hexanoate    | 238.30 | 64.74 | 66.80 | -2.06 |
| Ethylamine                                  | 56.70  | 14.93 | 16.99 | -2.06 |
| 2,4,4-Trimethyl-2-pentanol                  | 150.90 | 40.77 | 42.83 | -2.06 |
| Dimethyldi-2-pentoxysilane                  | 252.40 | 68.61 | 70.66 | -2.05 |
| 2,5-Dipropyl-3-methylthiophane              | 201.00 | 58.62 | 56.57 | 2.05  |
| 2-Methyltetradecane-2-ol                    | 268.80 | 73.11 | 75.16 | -2.05 |
| Methyl 2-thiophenecarboxylate               | 120.10 | 36.43 | 34.38 | 2.05  |
| 1,2,4-Trifluorobenzene                      | 98.10  | 26.29 | 28.34 | -2.05 |
| Cyclopentanemethanol                        | 109.00 | 29.28 | 31.33 | -2.05 |
| trans-3-Hexenoic acid                       | 116.80 | 31.42 | 33.47 | -2.05 |
| 2,2'-Diaminodiethylamine                    | 114.10 | 30.68 | 32.73 | -2.05 |
| 1,1,1,3-Tetrachloropropane                  | 117.70 | 35.77 | 33.72 | 2.05  |
| 1,2-Dimethylhydrazine                       | 69.40  | 18.42 | 20.47 | -2.05 |

|                                         |        |       |       |       |
|-----------------------------------------|--------|-------|-------|-------|
| 3,4-Dimethylheptane                     | 160.90 | 43.52 | 45.57 | -2.05 |
| 2,2-Dimethylpropylamine                 | 106.10 | 28.49 | 30.54 | -2.05 |
| 1,2-Dimethylpropylamine                 | 106.10 | 28.49 | 30.54 | -2.05 |
| 2,3,4,5-Tetramethylhexane               | 176.50 | 47.80 | 49.85 | -2.05 |
| 2-Methylhexane                          | 128.30 | 34.58 | 36.63 | -2.05 |
| trans-2-Nonenoic acid                   | 167.60 | 45.36 | 47.41 | -2.05 |
| 4-Propylphenol                          | 141.20 | 42.21 | 40.16 | 2.05  |
| Isopentane                              | 94.50  | 25.31 | 27.36 | -2.05 |
| Dicyclopropyl ketone                    | 116.30 | 31.29 | 33.33 | -2.04 |
| Ethyl bis(diethylamino)silane           | 221.60 | 64.26 | 62.22 | 2.04  |
| alpha-Ionol                             | 211.00 | 61.35 | 59.31 | 2.04  |
| Propyl vinyl ether                      | 99.40  | 26.66 | 28.70 | -2.04 |
| Heptadecanitrile                        | 296.60 | 80.75 | 82.79 | -2.04 |
| 2-Methoxy-1-phenylethanone              | 144.80 | 43.19 | 41.15 | 2.04  |
| 2-Thiopheneacetonitrile                 | 109.80 | 33.59 | 31.55 | 2.04  |
| 9,10-Dimethyloctadecane                 | 343.30 | 93.56 | 95.60 | -2.04 |
| 1-Ethyl-3-methylpyridinium ethylsulfate | 221.60 | 60.18 | 62.22 | -2.04 |
| 7-Butyl-7-tridecanol                    | 302.50 | 82.37 | 84.41 | -2.04 |
| Diethyl bromomalonate                   | 169.90 | 46.00 | 48.04 | -2.04 |
| 2-Ethylhexyl methacrylate               | 217.00 | 58.92 | 60.96 | -2.04 |
| 4-Methoxybenzeneacetaldehyde            | 143.10 | 42.72 | 40.69 | 2.03  |
| Phlorol                                 | 124.40 | 37.59 | 35.56 | 2.03  |
| 2,6-Dimethyloctane                      | 177.80 | 48.17 | 50.20 | -2.03 |
| 2,6-Dimethylmorpholine                  | 122.20 | 32.92 | 34.95 | -2.03 |
| Ethoxyacetylene                         | 77.10  | 20.55 | 22.58 | -2.03 |
| Dimethyldioctoxysilane                  | 354.00 | 96.50 | 98.53 | -2.03 |
| cis-3,3,5-Trimethylcyclohexanol         | 158.40 | 42.85 | 44.88 | -2.03 |
| 4-Methylheptane                         | 144.80 | 39.12 | 41.15 | -2.03 |
| Benzyl acrylate                         | 155.80 | 46.20 | 44.17 | 2.03  |
| t-Butyl vinyl ether                     | 115.30 | 31.03 | 33.06 | -2.03 |
| 2,2,3-Trimethylpentane                  | 144.10 | 38.93 | 40.96 | -2.03 |
| 2-Octyn-1-ol                            | 144.10 | 38.93 | 40.96 | -2.03 |
| Dipropylethylthioborane                 | 178.70 | 52.48 | 50.45 | 2.03  |
| Octane                                  | 144.90 | 39.15 | 41.18 | -2.03 |
| 1-Ethylimidazolium acetate              | 152.30 | 41.18 | 43.21 | -2.03 |
| 3,5-Dimethylanisole                     | 141.90 | 42.38 | 40.36 | 2.02  |
| 2-Butylamine                            | 90.00  | 24.10 | 26.12 | -2.02 |
| 2,5-Dimethyl-2,5-hexanediamine          | 167.40 | 45.33 | 47.35 | -2.02 |
| 2-Chlorophenol                          | 106.00 | 32.53 | 30.51 | 2.02  |
| 2-Chloro-2-methylpropanal               | 94.70  | 25.39 | 27.41 | -2.02 |
| Ketene                                  | 42.60  | 11.10 | 13.12 | -2.02 |
| 3-Buten-1-ol                            | 81.50  | 21.77 | 23.79 | -2.02 |
| Allyl ethyl ether                       | 99.00  | 26.57 | 28.59 | -2.02 |
| n-Hexylamine                            | 123.50 | 33.29 | 35.31 | -2.02 |
| 2-t-Butylphenol                         | 156.50 | 46.38 | 44.36 | 2.02  |
| Chloronitromethane                      | 65.60  | 17.41 | 19.43 | -2.02 |
| Tetra-2-butoxysilane                    | 332.00 | 90.48 | 92.50 | -2.02 |
| 2,2,5,5-Tetramethyltetrahydrofuran      | 143.80 | 38.86 | 40.88 | -2.02 |
| Dimethylpropylamine                     | 106.50 | 28.63 | 30.65 | -2.02 |

|                                  |        |       |       |       |
|----------------------------------|--------|-------|-------|-------|
| 1-(Chloromethyl)-4-fluorobenzene | 117.90 | 35.79 | 33.77 | 2.02  |
| Di(2-ethylhexyl) maleate         | 358.90 | 97.86 | 99.88 | -2.02 |
| Tripropyl phosphite              | 209.60 | 56.91 | 58.93 | -2.02 |
| Phenyl propanoate                | 141.20 | 42.18 | 40.16 | 2.02  |
| Ethylenediamine                  | 68.50  | 18.21 | 20.22 | -2.01 |
| Dibromofluorophosphorus oxide    | 80.80  | 25.61 | 23.60 | 2.01  |
| 4-Penten-1-ol                    | 98.20  | 26.36 | 28.37 | -2.01 |
| Chloro butylthio propylborane    | 159.60 | 47.22 | 45.21 | 2.01  |
| 1-Ethoxy-2-nitrobenzene          | 148.70 | 44.23 | 42.22 | 2.01  |
| Nopinene                         | 150.60 | 44.75 | 42.74 | 2.01  |
| Octyl nitrite                    | 169.90 | 46.03 | 48.04 | -2.01 |
| Dimethyldipropoxysilane          | 187.80 | 50.94 | 52.95 | -2.01 |
| Ethylamino chlorofluorophosphate | 101.90 | 27.38 | 29.39 | -2.01 |
| 3-Methoxytoluene                 | 125.60 | 37.89 | 35.89 | 2.00  |
| 2-(2-Hydroxyethyl)-thiophene     | 117.40 | 35.64 | 33.64 | 2.00  |
| Ethyl dibromoacetate             | 126.70 | 38.19 | 36.19 | 2.00  |
| 1,3,5-Trimethyladamantane        | 194.70 | 56.84 | 54.84 | 2.00  |
| 3-Butyn-2-ol                     | 77.20  | 20.61 | 22.61 | -2.00 |
| Valerophenone                    | 168.60 | 49.68 | 47.68 | 2.00  |
| Heptane                          | 128.20 | 34.60 | 36.60 | -2.00 |
| cis-Chlorobromoethylene          | 72.00  | 23.18 | 21.18 | 2.00  |
| Butanal oxime                    | 93.40  | 25.06 | 27.05 | -1.99 |
| Triisopropylphosphite            | 208.90 | 56.74 | 58.73 | -1.99 |
| Ethylphenylboronic acid          | 141.10 | 42.13 | 40.14 | 1.99  |
| 1-Hydroxytetralin                | 147.30 | 43.83 | 41.84 | 1.99  |
| 2-Propylpyridine                 | 128.20 | 38.59 | 36.60 | 1.99  |
| 3,3,3-Trichloro-1-propene        | 98.20  | 30.36 | 28.37 | 1.99  |
| Ethylthio(diethylamino)borane    | 158.40 | 46.87 | 44.88 | 1.99  |
| 3-Methylpentadecane-3-ol         | 285.00 | 77.62 | 79.61 | -1.99 |
| 2,6-Difluoropyridine             | 88.70  | 23.78 | 25.76 | -1.98 |
| 10-Undecen-1-ol                  | 198.40 | 53.87 | 55.85 | -1.98 |
| 3-Ethyl-2-methylpentane          | 143.60 | 38.84 | 40.82 | -1.98 |
| 3-Methyloctane                   | 161.50 | 43.75 | 45.73 | -1.98 |
| 2,6-Dimethylheptan-4-one         | 161.90 | 43.86 | 45.84 | -1.98 |
| 4-Butylmorpholine                | 155.30 | 42.05 | 44.03 | -1.98 |
| Laurocapram                      | 316.70 | 86.32 | 88.30 | -1.98 |
| 3,4-Dihydro-2H-1-benzopyran      | 131.70 | 39.54 | 37.56 | 1.98  |
| 4-Octanone                       | 146.40 | 39.61 | 41.59 | -1.98 |
| Menthol                          | 174.80 | 47.40 | 49.38 | -1.98 |
| 1-Hydroxycyclohexanecarbonitrile | 127.00 | 34.29 | 36.27 | -1.98 |
| Cyclohexanecarbonitrile          | 118.50 | 31.96 | 33.94 | -1.98 |
| Benzyl nitrite                   | 124.10 | 37.45 | 35.47 | 1.98  |
| Methoxyacetylene                 | 61.10  | 16.22 | 18.19 | -1.97 |
| 1,1,2,2-Tetrachlorohexane        | 167.20 | 49.27 | 47.30 | 1.97  |
| Phenyltrifluorosilane            | 122.60 | 33.09 | 35.06 | -1.97 |
| 2-Butylphenol                    | 157.80 | 46.69 | 44.72 | 1.97  |
| Cyclopentanecarbonitrile         | 102.40 | 27.55 | 29.52 | -1.97 |
| 3-Aminopentane                   | 106.30 | 28.62 | 30.59 | -1.97 |
| Chloromethyl methyl ether        | 68.60  | 18.28 | 20.25 | -1.97 |

|                                                                      |        |        |        |       |
|----------------------------------------------------------------------|--------|--------|--------|-------|
| Benzotrifluoride                                                     | 114.10 | 30.76  | 32.73  | -1.97 |
| Ethyl salicylate                                                     | 152.70 | 45.29  | 43.32  | 1.97  |
| trans-3-Methylcyclohexanol                                           | 125.40 | 33.86  | 35.83  | -1.97 |
| 3,5-Dimethylheptan-4-one                                             | 162.00 | 43.90  | 45.87  | -1.97 |
| Butylethylamine                                                      | 123.90 | 33.45  | 35.42  | -1.97 |
| 1,1-Di(2-chloroethoxy)ethane                                         | 158.90 | 43.05  | 45.02  | -1.97 |
| Didecyl isophthalate                                                 | 471.50 | 132.73 | 130.76 | 1.97  |
| 2-Pentyltetrahydrofuran                                              | 159.70 | 43.27  | 45.24  | -1.97 |
| Dimethyldinonyloxysilane                                             | 387.20 | 105.67 | 107.64 | -1.97 |
| Isopropylamine                                                       | 73.40  | 19.60  | 21.57  | -1.97 |
| 2-(2-(Methylthio)ethylthio)ethanol                                   | 141.60 | 42.24  | 40.27  | 1.97  |
| 2-Bromo-2-chlorobutane                                               | 110.10 | 33.60  | 31.63  | 1.97  |
| Azidobenzene                                                         | 116.70 | 35.41  | 33.44  | 1.97  |
| 1-(Dimethylamino)-2-propanol                                         | 115.50 | 31.15  | 33.12  | -1.97 |
| 1-Ethynylcyclohexanol                                                | 132.70 | 35.87  | 37.83  | -1.96 |
| 4-Heptanamine                                                        | 139.70 | 37.79  | 39.75  | -1.96 |
| cis-Crotyl alcohol                                                   | 81.00  | 21.69  | 23.65  | -1.96 |
| Ammonia                                                              | 22.70  | 5.70   | 7.66   | -1.96 |
| Phenylacetone                                                        | 135.20 | 40.48  | 38.52  | 1.96  |
| Fluorotripropylsilane                                                | 192.70 | 52.33  | 54.29  | -1.96 |
| 4-Methyloctane                                                       | 161.60 | 43.80  | 45.76  | -1.96 |
| 3-Methylnonane                                                       | 177.60 | 48.19  | 50.15  | -1.96 |
| Dimethylnitramine                                                    | 80.90  | 21.67  | 23.63  | -1.96 |
| Chloroacetonitrile                                                   | 60.30  | 16.02  | 17.97  | -1.95 |
| Menthyl isovalerate                                                  | 260.60 | 70.96  | 72.91  | -1.95 |
| Cyclopentanone                                                       | 86.50  | 23.21  | 25.16  | -1.95 |
| 3-Piperidinemethanol                                                 | 121.50 | 32.81  | 34.76  | -1.95 |
| 4-Methoxytoluene                                                     | 125.40 | 37.78  | 35.83  | 1.95  |
| Benzene                                                              | 83.40  | 26.26  | 24.31  | 1.95  |
| Amylamine                                                            | 106.80 | 28.78  | 30.73  | -1.95 |
| 2-Methoxymethylthiophene                                             | 116.80 | 35.42  | 33.47  | 1.95  |
| trans-2-Heptenoic acid                                               | 133.30 | 36.05  | 38.00  | -1.95 |
| Methyl 3-cyclohexene-1-carboxylate                                   | 140.30 | 37.97  | 39.92  | -1.95 |
| 2,6-Dimethylpentamethylene sulfide                                   | 135.40 | 40.52  | 38.57  | 1.95  |
| 1-Phenyl-2-butanone                                                  | 151.70 | 44.99  | 43.04  | 1.95  |
| Benzyl methacrylate                                                  | 172.30 | 50.64  | 48.69  | 1.95  |
| Allyl cyanide                                                        | 73.90  | 19.76  | 21.71  | -1.95 |
| Methylphenylboronic acid                                             | 124.40 | 37.50  | 35.56  | 1.94  |
| 3,3-Dimethylheptane                                                  | 161.10 | 43.68  | 45.62  | -1.94 |
| Valeryl chloride                                                     | 111.40 | 30.05  | 31.99  | -1.94 |
| cis-4-Methylcyclohexanol                                             | 125.40 | 33.89  | 35.83  | -1.94 |
| Furfuryl butyrate                                                    | 161.20 | 43.71  | 45.65  | -1.94 |
| 1-Phenyl-2-pentanone                                                 | 168.60 | 49.62  | 47.68  | 1.94  |
| N-Nitroso-N-methyl-N-isopropylamine                                  | 105.70 | 28.49  | 30.43  | -1.94 |
| Isopropenylacetate                                                   | 99.90  | 26.90  | 28.84  | -1.94 |
| 1-Butyl-1-methylpyrrolidinium 2-acryloamido-2-methylpropanesulfonate | 335.30 | 91.47  | 93.40  | -1.93 |
| Triisopropoxyvinylsilane                                             | 238.90 | 65.03  | 66.96  | -1.93 |
| Isopropyl 2-(2,3-dihydroxypropoxy)ethyl                              | 190.30 | 51.70  | 53.63  | -1.93 |

|                                          |        |       |       |       |
|------------------------------------------|--------|-------|-------|-------|
| thioether                                |        |       |       |       |
| Ethyl bis(2,2-dimethylhydrazino)silane   | 183.40 | 53.67 | 51.74 | 1.93  |
| 1-Hepten-4-ol                            | 131.30 | 35.52 | 37.45 | -1.93 |
| Heptanoamide                             | 142.20 | 38.51 | 40.44 | -1.93 |
| 2-Methyl-2-butanamine                    | 106.10 | 28.61 | 30.54 | -1.93 |
| Ethyl 2,4-dibromobutanoate               | 159.50 | 47.11 | 45.18 | 1.93  |
| 1-Chloro-1,3-butadiene                   | 81.70  | 25.77 | 23.84 | 1.93  |
| Allylmethyldichlorosilane                | 126.80 | 38.14 | 36.21 | 1.93  |
| Diethoxymethylphenylsilane               | 209.60 | 60.85 | 58.93 | 1.92  |
| 2-Methoxythiophene                       | 100.70 | 30.98 | 29.06 | 1.92  |
| 2-Octanamine                             | 156.80 | 42.52 | 44.44 | -1.92 |
| Methyl 2-octynoate                       | 163.80 | 44.44 | 46.36 | -1.92 |
| Tetraisobutylsilane                      | 301.30 | 86.00 | 84.08 | 1.92  |
| 3,3-Dimethylhexane                       | 144.00 | 39.01 | 40.93 | -1.92 |
| Di-2-naphthyl disulfide                  | 277.40 | 75.60 | 77.52 | -1.92 |
| Ethylene glycol monosulfite              | 74.80  | 20.03 | 21.95 | -1.92 |
| Isopentylamine                           | 106.30 | 28.67 | 30.59 | -1.92 |
| 1-Chloro-3-fluoro-2-methylbenzene        | 118.50 | 35.86 | 33.94 | 1.92  |
| Dichloro octoxyborine                    | 198.10 | 53.85 | 55.77 | -1.92 |
| Tetraethylurea                           | 184.50 | 50.12 | 52.04 | -1.92 |
| 4-Methyl-2-heptanol                      | 152.70 | 41.40 | 43.32 | -1.92 |
| 5-Methyl-2-isopropylcyclohexanol acetate | 210.70 | 57.31 | 59.23 | -1.92 |
| 8-Propyl-8-pentadecanol                  | 319.20 | 87.07 | 88.99 | -1.92 |
| Nitrocyclohexane                         | 123.60 | 33.42 | 35.34 | -1.92 |
| Phenyl O-hexyl phosphonic acid           | 222.50 | 64.38 | 62.46 | 1.92  |
| Methyl benzoylacetate                    | 163.00 | 48.06 | 46.14 | 1.92  |
| 2,3-Dimethyloctane                       | 177.70 | 48.26 | 50.18 | -1.92 |
| Triethylphosphine                        | 134.60 | 40.27 | 38.35 | 1.92  |
| Ethyl 2,3-dibromopropionate              | 143.10 | 42.60 | 40.69 | 1.91  |
| 2,4-Dimethylpentane                      | 128.00 | 34.63 | 36.54 | -1.91 |
| 1-(2-Furyl)-2-oxa-4-pentanol             | 149.80 | 40.61 | 42.52 | -1.91 |
| 1-Decylphosphine                         | 200.60 | 58.37 | 56.46 | 1.91  |
| 3-Methylbutanaloxime                     | 109.80 | 29.64 | 31.55 | -1.91 |
| 2,5-Lutidine                             | 111.50 | 33.93 | 32.02 | 1.91  |
| 1-Amino-3-methoxypropane                 | 99.70  | 26.87 | 28.78 | -1.91 |
| Phenyl dipropoxyborine                   | 215.30 | 62.40 | 60.49 | 1.91  |
| Decamethyltetrasiloxane                  | 302.00 | 86.18 | 84.27 | 1.91  |
| N-Nitrosodiethylamine                    | 105.60 | 28.49 | 30.40 | -1.91 |
| 4-Chloroanisole                          | 123.40 | 37.19 | 35.28 | 1.91  |
| N-Nitroso-N-methyl-N-butylamine          | 122.80 | 33.21 | 35.12 | -1.91 |
| 3-Methyl-1,3-pentadiene                  | 98.50  | 30.36 | 28.45 | 1.91  |
| 4-Tolyl dimethoxyborine                  | 164.60 | 48.49 | 46.58 | 1.91  |
| 4-Morpholinamine                         | 101.10 | 27.26 | 29.17 | -1.91 |
| N-Nitroso-N-methyl-N-propylamine         | 105.80 | 28.55 | 30.45 | -1.90 |
| trans-2-Methyl-2-pentenoic acid          | 116.70 | 31.54 | 33.44 | -1.90 |
| 3-Methyl-1-octyn-3-ol                    | 160.30 | 43.50 | 45.40 | -1.90 |
| Decane                                   | 178.20 | 48.41 | 50.31 | -1.90 |
| Pentyloxybenzene                         | 176.10 | 51.64 | 49.74 | 1.90  |
| 2,2-Dimethylhexane                       | 144.80 | 39.25 | 41.15 | -1.90 |



|                                         |        |        |        |       |
|-----------------------------------------|--------|--------|--------|-------|
| Dibutylphosphine                        | 167.10 | 49.17  | 47.27  | 1.90  |
| N,N-Diethylaminotriethylsilane          | 210.20 | 60.99  | 59.09  | 1.90  |
| Phenyl diisobutoxyborine                | 248.30 | 71.44  | 69.54  | 1.90  |
| Dipropylamine                           | 123.90 | 33.52  | 35.42  | -1.90 |
| Diethylaminoacetone                     | 141.40 | 38.32  | 40.22  | -1.90 |
| 2,6-Lutidine                            | 111.40 | 33.89  | 31.99  | 1.90  |
| Dipropylbutylthioborane                 | 212.10 | 61.51  | 59.61  | 1.90  |
| Ethyl 4-methylbenzoate                  | 161.90 | 47.74  | 45.84  | 1.90  |
| 2-Buten-1-ol                            | 81.20  | 21.81  | 23.71  | -1.90 |
| t-Butyl acrylate                        | 133.70 | 36.21  | 38.11  | -1.90 |
| Phenyldibutylcarbinol                   | 240.80 | 69.38  | 67.48  | 1.90  |
| 2-Bromo-1,1-diethoxyethane              | 148.90 | 40.38  | 42.28  | -1.90 |
| 3-Methyl-2,5-furandione                 | 93.30  | 25.13  | 27.03  | -1.90 |
| 2-Methoxyfuran                          | 91.40  | 24.61  | 26.51  | -1.90 |
| Tetracosanoic acid                      | 423.60 | 115.73 | 117.62 | -1.89 |
| 2,4-Lutidine                            | 111.50 | 33.91  | 32.02  | 1.89  |
| n-Heptylamine                           | 140.20 | 38.00  | 39.89  | -1.89 |
| Diethylamine                            | 90.50  | 24.37  | 26.26  | -1.89 |
| 4-Hydroxy-2-butanone                    | 87.40  | 23.52  | 25.41  | -1.89 |
| Isopropyl vinyl ether                   | 99.10  | 26.73  | 28.62  | -1.89 |
| 5-Chloro-2-pentanone                    | 111.20 | 30.05  | 31.94  | -1.89 |
| Ethyl chlorosulfonate                   | 99.60  | 26.87  | 28.75  | -1.88 |
| 1-Tridecyne                             | 218.60 | 59.51  | 61.39  | -1.88 |
| Cyclohexanemethanol                     | 125.30 | 33.92  | 35.80  | -1.88 |
| Propargyl aldehyde                      | 54.20  | 14.42  | 16.30  | -1.88 |
| 2-Methoxynitrobenzene                   | 132.10 | 39.55  | 37.67  | 1.88  |
| Ethyl 1-piperidinepropanoate            | 191.10 | 51.97  | 53.85  | -1.88 |
| n-Octylamine                            | 156.90 | 42.59  | 44.47  | -1.88 |
| Bis(fluoro phenoxy oxophosphorus) oxide | 242.90 | 69.94  | 68.06  | 1.88  |
| 2-Methylbenzeneethanol                  | 140.20 | 41.77  | 39.89  | 1.88  |
| 2-Bromo-1-chloropropane                 | 93.90  | 29.07  | 27.19  | 1.88  |
| Pivalic acid chloride                   | 111.10 | 30.03  | 31.91  | -1.88 |
| 3,3,4-Trimethylhexane                   | 160.50 | 43.58  | 45.46  | -1.88 |
| Cetyl palmitate                         | 557.60 | 152.50 | 154.38 | -1.88 |
| alpha-Linolenic acid                    | 302.60 | 86.31  | 84.43  | 1.88  |
| 1-Hexylphosphine                        | 133.80 | 40.01  | 38.13  | 1.88  |
| Trimethyl 1-ethoxyethoxysilane          | 171.20 | 46.52  | 48.39  | -1.87 |
| 4-Pyridineethanamine                    | 123.20 | 37.10  | 35.23  | 1.87  |
| 1-Nonyne                                | 151.80 | 41.20  | 43.07  | -1.87 |
| Butoxybenzene                           | 159.30 | 47.00  | 45.13  | 1.87  |
| Tetramethylphosphorodiamidic fluoride   | 130.90 | 35.47  | 37.34  | -1.87 |
| Ethyl elaidate                          | 351.40 | 95.95  | 97.82  | -1.87 |
| 3-Ethyl-3-methylhexane                  | 160.10 | 43.48  | 45.35  | -1.87 |
| Chlorovinyl dimethylsilane              | 113.70 | 34.49  | 32.62  | 1.87  |
| N-Nitroso-N-methyl-N-isobutylamine      | 122.80 | 33.25  | 35.12  | -1.87 |
| 4-Methylpiperidine                      | 112.70 | 30.48  | 32.35  | -1.87 |
| 3-Methylheptane                         | 144.20 | 39.12  | 40.99  | -1.87 |
| 1,1,1-Chlorodifluoro-2-iodoethane       | 93.40  | 28.92  | 27.05  | 1.87  |
| Dihydro-3-methylene-2(3H)-furanone      | 89.80  | 24.20  | 26.07  | -1.87 |

|                                         |        |        |        |       |
|-----------------------------------------|--------|--------|--------|-------|
| 1-Pentylphosphine                       | 117.10 | 35.42  | 33.55  | 1.87  |
| Oxepane                                 | 109.70 | 29.66  | 31.52  | -1.86 |
| 2,2,3,3-Tetramethylpentane              | 159.90 | 43.43  | 45.29  | -1.86 |
| 1-Nonylphosphine                        | 183.90 | 53.74  | 51.88  | 1.86  |
| 2-Methyl-2-propenol                     | 80.60  | 21.68  | 23.54  | -1.86 |
| 2-Chloroethyl chloroformate             | 102.40 | 27.66  | 29.52  | -1.86 |
| 1,1,2,3-Tetrachloropropane              | 117.70 | 35.58  | 33.72  | 1.86  |
| alpha-Methylbenzeneacetaldehyde         | 134.80 | 40.27  | 38.41  | 1.86  |
| 3-Pyridinemethanamine                   | 106.40 | 32.48  | 30.62  | 1.86  |
| 4-Nitroanisole                          | 132.40 | 39.61  | 37.75  | 1.86  |
| 2-Tolyl dimethoxyborine                 | 163.50 | 48.14  | 46.28  | 1.86  |
| 2,3,4-Trichloro-1-butene                | 114.10 | 34.59  | 32.73  | 1.86  |
| 1-Hexen-3-ol                            | 114.60 | 31.01  | 32.87  | -1.86 |
| 2-Cyclohexen-1-ol                       | 103.80 | 28.05  | 29.91  | -1.86 |
| 3-Ethyl-2,5-dimethylpyrazine            | 139.60 | 41.58  | 39.73  | 1.85  |
| 1-Butyl-3-methylimidazolium thiocyanate | 198.70 | 57.79  | 55.94  | 1.85  |
| Undecane                                | 194.90 | 53.04  | 54.89  | -1.85 |
| 2,3-Dimethylheptane                     | 160.70 | 43.66  | 45.51  | -1.85 |
| trans-2-Methyl-1,3-pentadiene           | 99.10  | 30.47  | 28.62  | 1.85  |
| Nonane                                  | 161.50 | 43.88  | 45.73  | -1.85 |
| Methyl 2-chloroacrylate                 | 99.30  | 26.82  | 28.67  | -1.85 |
| Dibutylethylthioborane                  | 212.20 | 61.49  | 59.64  | 1.85  |
| Bis(diisobutylamino)borane              | 309.80 | 88.26  | 86.41  | 1.85  |
| 2-Methyl-5-propylthiophane              | 152.30 | 45.06  | 43.21  | 1.85  |
| 1,2-Bis(trimethylsilyl)acetylene        | 189.20 | 55.18  | 53.33  | 1.85  |
| 1-Octen-3-ol                            | 148.00 | 40.18  | 42.03  | -1.85 |
| 1,1,1,2-Tetrachloroethane               | 101.30 | 31.07  | 29.22  | 1.85  |
| Vinyldiethoxymethylsilane               | 165.90 | 45.09  | 46.94  | -1.85 |
| O-Ethyl propanoic imino ester           | 110.30 | 29.84  | 31.69  | -1.85 |
| trans-4-Hexen-1-ol                      | 114.60 | 31.02  | 32.87  | -1.85 |
| 2-Methylnonane                          | 178.00 | 48.41  | 50.26  | -1.85 |
| 2-(2-Pyridyl)ethylamine                 | 123.40 | 37.13  | 35.28  | 1.85  |
| 3,3-Dimethylcyclohexanol                | 141.90 | 38.51  | 40.36  | -1.85 |
| Phenyltriisopentyloxysilane             | 382.70 | 108.25 | 106.40 | 1.85  |
| Bis(isobutyl) cyclohexylboronate        | 265.60 | 72.44  | 74.29  | -1.85 |
| 4-Cumylphenol                           | 141.20 | 42.01  | 40.16  | 1.85  |
| Metasystox                              | 196.00 | 57.04  | 55.20  | 1.84  |
| 2-(Bromomethoxy)octane                  | 189.00 | 55.12  | 53.28  | 1.84  |
| Dodecane                                | 211.60 | 57.63  | 59.47  | -1.84 |
| 2-Fluoronitrobenzene                    | 111.20 | 33.78  | 31.94  | 1.84  |
| 4-Methyl-2-hexanamine                   | 138.90 | 37.69  | 39.53  | -1.84 |
| 2,3,4-Trimethylpentane                  | 143.20 | 38.87  | 40.71  | -1.84 |
| Dinonyl isophthalate                    | 438.20 | 123.47 | 121.63 | 1.84  |
| 1,2-Propanediolsulfite                  | 91.50  | 24.69  | 26.53  | -1.84 |
| 2,2-Dimethylpentane                     | 127.70 | 34.62  | 36.46  | -1.84 |
| Dibutylacetamide                        | 191.50 | 52.12  | 53.96  | -1.84 |
| trans-3-Heptenoic acid                  | 132.90 | 36.05  | 37.89  | -1.84 |
| cis-2-Penten-1-ol                       | 97.60  | 26.37  | 28.21  | -1.84 |
| 1,3-Propanediamine                      | 85.20  | 22.97  | 24.80  | -1.83 |

|                                             |        |        |        |       |
|---------------------------------------------|--------|--------|--------|-------|
| 1,3-Dichloro-2-propanol nitrate             | 120.20 | 32.57  | 34.40  | -1.83 |
| t-Butylamine                                | 89.90  | 24.26  | 26.09  | -1.83 |
| 2-Heptanamine                               | 140.10 | 38.03  | 39.86  | -1.83 |
| 2-Pentoxy-4-methyl-1,3,2-dioxaphospholane   | 182.10 | 49.55  | 51.38  | -1.83 |
| Di-n-butylsulfite                           | 185.60 | 50.51  | 52.34  | -1.83 |
| N-Vinylthiourea                             | 91.70  | 28.42  | 26.59  | 1.83  |
| 3-(Diethylamino)propionitrile               | 140.20 | 38.06  | 39.89  | -1.83 |
| 1,1,1,2-Tetrachloropropane                  | 117.50 | 35.49  | 33.66  | 1.83  |
| 3-Nitrobenzotrifluoride                     | 137.30 | 37.27  | 39.09  | -1.82 |
| 3-Buten-2-one                               | 74.40  | 20.02  | 21.84  | -1.82 |
| Cyclohexyl propanoate                       | 161.90 | 44.02  | 45.84  | -1.82 |
| 3,4-Dimethyloctane                          | 177.90 | 48.41  | 50.23  | -1.82 |
| Methyl dichloroacetate                      | 101.70 | 27.51  | 29.33  | -1.82 |
| 2-Isobutyltetrahydrofuran                   | 142.70 | 38.76  | 40.58  | -1.82 |
| N-Ethyl-1,2-ethanediamine                   | 102.30 | 27.68  | 29.49  | -1.81 |
| 2,3-Dimethylbutane                          | 110.10 | 29.82  | 31.63  | -1.81 |
| 4,4-Dimethylcyclohexanone                   | 135.00 | 36.65  | 38.46  | -1.81 |
| N-Nitrosodipropylamine                      | 138.90 | 37.72  | 39.53  | -1.81 |
| 1-Methylcyclohexanol                        | 125.30 | 33.99  | 35.80  | -1.81 |
| 2,3-Dihydrofuran                            | 71.70  | 19.29  | 21.10  | -1.81 |
| 2,2-Dichloro-7,7-bis(ethoxycarbonyl)heptane | 276.70 | 75.52  | 77.33  | -1.81 |
| N-Nitrosodibutylamine                       | 172.60 | 46.97  | 48.78  | -1.81 |
| 1-Acetylpiperidine                          | 131.40 | 35.67  | 37.48  | -1.81 |
| 3-Ethylloctane                              | 178.10 | 48.48  | 50.29  | -1.81 |
| 1-Chloro-1-ethoxyethane                     | 101.90 | 27.58  | 29.39  | -1.81 |
| Ethyl methyl ketone oxime                   | 92.20  | 24.92  | 26.72  | -1.80 |
| Phenylpropylether                           | 142.70 | 42.38  | 40.58  | 1.80  |
| Ethyl 10-undecenoate                        | 234.70 | 64.01  | 65.81  | -1.80 |
| trans-2-Penten-1-ol                         | 97.90  | 26.49  | 28.29  | -1.80 |
| 1-Methyl-2-propyl-4-ethylpyrrole            | 167.70 | 49.23  | 47.43  | 1.80  |
| 3,4-Dichloro-1-butene                       | 100.80 | 30.88  | 29.08  | 1.80  |
| Cyclohexylisopropylamine                    | 161.80 | 44.02  | 45.81  | -1.79 |
| Sulfolane                                   | 99.70  | 26.99  | 28.78  | -1.79 |
| 2,3,3-Trimethylhexane                       | 160.40 | 43.64  | 45.43  | -1.79 |
| 5-Ethylidene-2-norbornene                   | 130.10 | 38.91  | 37.12  | 1.79  |
| Perillaldehyde                              | 157.30 | 46.37  | 44.58  | 1.79  |
| gamma-Terpinene                             | 153.40 | 45.30  | 43.51  | 1.79  |
| 1,5-Diazabicyclo[4.3.0]non-5-ene            | 125.00 | 37.51  | 35.72  | 1.79  |
| 7-Chloroheptanonitrile                      | 143.80 | 39.09  | 40.88  | -1.79 |
| 1,1-Dimethylcyclopropane                    | 88.20  | 23.84  | 25.63  | -1.79 |
| Diheptyl isophthalate                       | 371.80 | 105.20 | 103.41 | 1.79  |
| 2,2-Dimethylheptane                         | 161.40 | 43.92  | 45.71  | -1.79 |
| 3-Ethylheptane                              | 161.40 | 43.92  | 45.71  | -1.79 |
| 4-Butylphenol                               | 157.90 | 46.53  | 44.75  | 1.78  |
| 2-Methylheptane                             | 144.30 | 39.23  | 41.01  | -1.78 |
| 1-Hexyl-3-methylimidazolium thiocyanate     | 236.80 | 68.17  | 66.39  | 1.78  |
| Diallyl fumarate                            | 185.60 | 50.56  | 52.34  | -1.78 |
| Dichloroacetic acid                         | 84.50  | 22.83  | 24.61  | -1.78 |
| 2-Phenylpropionitrile                       | 133.30 | 39.78  | 38.00  | 1.78  |

|                                           |        |        |        |       |
|-------------------------------------------|--------|--------|--------|-------|
| 2,4-Dimethylhexane                        | 143.70 | 39.07  | 40.85  | -1.78 |
| 2-Propyl-5-hexylpyrrole                   | 217.20 | 62.79  | 61.01  | 1.78  |
| Furfurylacetate                           | 127.40 | 34.60  | 36.38  | -1.78 |
| 1-Piperidineethanol                       | 137.90 | 37.48  | 39.26  | -1.78 |
| (Methylsulfonyl)ethene                    | 89.30  | 24.15  | 25.93  | -1.78 |
| 2,5-Dimethyl-1,5-hexadiene                | 130.80 | 39.09  | 37.31  | 1.78  |
| Ethylcyclopropane                         | 88.20  | 23.85  | 25.63  | -1.78 |
| Butylthiodiethylborane                    | 178.60 | 52.20  | 50.42  | 1.78  |
| cis-3-Hexen-1-ol                          | 114.30 | 31.01  | 32.79  | -1.78 |
| 5-Methylnonane                            | 177.30 | 48.29  | 50.07  | -1.78 |
| Allyldiethoxymethylsilane                 | 185.10 | 50.43  | 52.21  | -1.78 |
| Bis(2-chloroethyl) ether                  | 116.30 | 31.56  | 33.33  | -1.77 |
| 1-Octylphosphine                          | 167.20 | 49.07  | 47.30  | 1.77  |
| Butyl 2-hydroxybenzoate                   | 186.20 | 54.28  | 52.51  | 1.77  |
| 4-Chlorobutanal                           | 95.00  | 25.72  | 27.49  | -1.77 |
| O-Ethyl butanoic imino ester              | 126.90 | 34.47  | 36.24  | -1.77 |
| 2,2,3,3,4-Pentamethylpentane              | 175.90 | 47.91  | 49.68  | -1.77 |
| Tri-N-butylborazole                       | 291.40 | 79.59  | 81.36  | -1.77 |
| 4-Methylene-2-oxetanone                   | 75.20  | 20.29  | 22.06  | -1.77 |
| n-Nonylamine                              | 173.60 | 47.28  | 49.05  | -1.77 |
| Methylisothiocyanate                      | 64.80  | 20.98  | 19.21  | 1.77  |
| 4-Heptanone ketazine                      | 255.70 | 73.34  | 71.57  | 1.77  |
| 3-Tolyl dimethoxyborine                   | 164.70 | 48.38  | 46.61  | 1.77  |
| 4-Methylnonane                            | 177.60 | 48.38  | 50.15  | -1.77 |
| Ethyl dichloroacetate                     | 118.50 | 32.17  | 33.94  | -1.77 |
| Allyl ether                               | 110.00 | 29.84  | 31.61  | -1.77 |
| 1-(2-Furyl)-2-oxa-4-pentyl acetate        | 195.20 | 53.21  | 54.98  | -1.77 |
| 1-(2-Tetrahydrofuryl)-3-aminobutane       | 154.80 | 42.13  | 43.89  | -1.76 |
| 3,5-Lutidine                              | 111.60 | 33.81  | 32.05  | 1.76  |
| Tiglic acid                               | 99.60  | 26.99  | 28.75  | -1.76 |
| 2,6-Dimethylheptane                       | 161.50 | 43.97  | 45.73  | -1.76 |
| Cyclohexanone                             | 102.80 | 27.87  | 29.63  | -1.76 |
| t-Butyl isocyanate                        | 103.60 | 28.09  | 29.85  | -1.76 |
| 3-(Dipropylamino)propionitrile            | 173.60 | 47.29  | 49.05  | -1.76 |
| 2,3,5-Trimethylhexane                     | 160.00 | 43.56  | 45.32  | -1.76 |
| 2-Pentanone oxime                         | 109.10 | 29.60  | 31.36  | -1.76 |
| 2,2-Chloriodo-1,1-difluoro-1-ethoxyethane | 135.90 | 40.47  | 38.71  | 1.76  |
| Ethyl oleate                              | 351.10 | 95.98  | 97.74  | -1.76 |
| Methyl linolenate                         | 321.30 | 91.32  | 89.56  | 1.76  |
| 3-(2-Furyl)-4-oxa-6-hexanol               | 166.00 | 45.21  | 46.97  | -1.76 |
| 2-Ethylpentamethylene sulfide             | 135.40 | 40.33  | 38.57  | 1.76  |
| Dodecamethylcyclohexasiloxane             | 396.30 | 111.89 | 110.13 | 1.76  |
| Hexacosanoic acid                         | 457.00 | 125.03 | 126.78 | -1.75 |
| 2-Bromo-3-methyl-1-butene                 | 106.90 | 32.51  | 30.76  | 1.75  |
| 3-Cyclohexene-1-carboxylic acid           | 122.20 | 33.20  | 34.95  | -1.75 |
| Diamylamine                               | 190.70 | 51.99  | 53.74  | -1.75 |
| 4-Nitromethyltoluene                      | 139.40 | 41.42  | 39.67  | 1.75  |
| 4-Phenyl-1,3-dioxane                      | 156.10 | 46.00  | 44.25  | 1.75  |
| 3,5-Dimethylheptane                       | 160.90 | 43.82  | 45.57  | -1.75 |

|                                                             |        |        |        |       |
|-------------------------------------------------------------|--------|--------|--------|-------|
| Ethylthio dioctyl borane                                    | 345.80 | 98.03  | 96.28  | 1.75  |
| Bis(2-furfuryl)amine                                        | 165.30 | 48.52  | 46.77  | 1.75  |
| Tetrachloromethane                                          | 84.80  | 26.44  | 24.69  | 1.75  |
| 9-Decen-1-ol                                                | 181.70 | 49.53  | 51.27  | -1.74 |
| 3-Chloropropyl chloroformate                                | 119.10 | 32.36  | 34.10  | -1.74 |
| 3,4-Dimethylhexane                                          | 143.60 | 39.08  | 40.82  | -1.74 |
| Ethoxybenzene                                               | 125.90 | 37.71  | 35.97  | 1.74  |
| Dimethyldi-2-butoxysilane                                   | 218.70 | 59.68  | 61.42  | -1.74 |
| Trimethyl 1-isopropoxyethoxysilane                          | 187.60 | 51.15  | 52.89  | -1.74 |
| 3-Methyl-6-nonanone                                         | 179.10 | 48.82  | 50.56  | -1.74 |
| 1,8(H)-Diazabicyclo[5.4.0]undec-7-enium<br>imidazolate      | 221.40 | 63.90  | 62.16  | 1.74  |
| 1-Phenyl-2-propanol                                         | 140.50 | 41.71  | 39.97  | 1.74  |
| Phenylpropylboronic acid                                    | 157.60 | 46.40  | 44.66  | 1.74  |
| o-Cresol                                                    | 108.60 | 32.96  | 31.22  | 1.74  |
| 1,2-Dichloro-1-fluoroethane                                 | 78.10  | 21.12  | 22.86  | -1.74 |
| Tridecane                                                   | 228.60 | 62.40  | 64.14  | -1.74 |
| O-Ethyl difluorothiophosphate                               | 101.10 | 27.43  | 29.17  | -1.74 |
| Ethyl 2-methylbenzoate                                      | 161.00 | 47.33  | 45.60  | 1.73  |
| Benzyl-t-butanol                                            | 173.80 | 50.84  | 49.11  | 1.73  |
| Butylsulfinyl chloride                                      | 116.60 | 35.15  | 33.42  | 1.73  |
| Dihexylamine                                                | 224.10 | 61.17  | 62.90  | -1.73 |
| 2-Octen-1-ol                                                | 148.00 | 40.30  | 42.03  | -1.73 |
| 4-Methylcyclohexanemethanol                                 | 142.60 | 38.82  | 40.55  | -1.73 |
| Trihexyl tetradecyl phosphonium<br>trifluoromethylsulfonate | 641.60 | 175.69 | 177.42 | -1.73 |
| Cyclooctanone                                               | 134.90 | 36.71  | 38.44  | -1.73 |
| 2-(Methylthiomethylthio)ethanol                             | 124.90 | 37.42  | 35.69  | 1.73  |
| 1-Butylphosphine                                            | 100.40 | 30.70  | 28.97  | 1.73  |
| Ethyl bis(N,N-dimethylamino) phosphate                      | 167.20 | 45.57  | 47.30  | -1.73 |
| 1,5-Pentanediamine                                          | 118.60 | 32.24  | 33.97  | -1.73 |
| 2,5-Dimethyloxazole                                         | 94.50  | 25.63  | 27.36  | -1.73 |
| 2-Ethyl-5-propylthiophane                                   | 168.80 | 49.46  | 47.73  | 1.73  |
| 1-Methyl-4-cyclopropyl-1,4-cyclohexadiene                   | 147.00 | 43.48  | 41.76  | 1.72  |
| Neohexane                                                   | 111.00 | 30.16  | 31.88  | -1.72 |
| 6-Aminopurine                                               | 109.00 | 33.05  | 31.33  | 1.72  |
| Di(2-ethylhexyl) fumarate                                   | 360.80 | 98.68  | 100.40 | -1.72 |
| Sulfurdioxide                                               | 36.90  | 9.84   | 11.56  | -1.72 |
| Azetidine                                                   | 64.60  | 17.44  | 19.15  | -1.71 |
| 5-Bromo-1-pentene                                           | 107.70 | 32.69  | 30.98  | 1.71  |
| 3-Butyn-2-one                                               | 70.50  | 19.06  | 20.77  | -1.71 |
| n-Decylamine                                                | 190.30 | 51.92  | 53.63  | -1.71 |
| 1-Bromo-2-chloropropane                                     | 94.00  | 28.93  | 27.22  | 1.71  |
| Methylelaidate                                              | 334.60 | 91.50  | 93.21  | -1.71 |
| N-Nitrosodipentylamine                                      | 205.90 | 56.20  | 57.91  | -1.71 |
| Dipropyl sulfide                                            | 130.50 | 38.94  | 37.23  | 1.71  |
| Styrene oxide                                               | 118.40 | 35.62  | 33.91  | 1.71  |
| Dioctyl terephthalate                                       | 405.00 | 114.23 | 112.52 | 1.71  |
| Isoxazole                                                   | 61.30  | 16.54  | 18.25  | -1.71 |

|                                             |        |        |        |       |
|---------------------------------------------|--------|--------|--------|-------|
| 4-Fluorobenzoyl chloride                    | 121.50 | 36.47  | 34.76  | 1.71  |
| Isobutyl vinyl ether                        | 115.80 | 31.49  | 33.20  | -1.71 |
| n-Butyldichloroacetate                      | 152.00 | 41.42  | 43.13  | -1.71 |
| 2-Ethyltetrahydropyran                      | 125.20 | 34.07  | 35.78  | -1.71 |
| 4,4-Dimethylheptane                         | 160.60 | 43.78  | 45.49  | -1.71 |
| 3-Pentanone oxime                           | 108.90 | 29.60  | 31.31  | -1.71 |
| 2-Methyltetrahydropyran                     | 108.60 | 29.52  | 31.22  | -1.70 |
| 4-Methylphenethyl alcohol                   | 140.70 | 41.73  | 40.03  | 1.70  |
| p-Menthadiene                               | 154.30 | 45.46  | 43.76  | 1.70  |
| 4-Pentenal                                  | 91.90  | 24.94  | 26.64  | -1.70 |
| Dihydrolinalool                             | 179.40 | 48.94  | 50.64  | -1.70 |
| 8-Heptyl-7-pentadecene                      | 368.10 | 104.10 | 102.40 | 1.70  |
| 1,2-Diisopropylhydrazine                    | 136.00 | 37.04  | 38.74  | -1.70 |
| Fluoroethyldiisopropylsilane                | 174.90 | 47.71  | 49.41  | -1.70 |
| 1-(3-Cyanopropyl)-pyridinium dicyanamide    | 211.50 | 57.75  | 59.45  | -1.70 |
| 2-Ethyl-5-methylthiophane                   | 135.80 | 40.38  | 38.68  | 1.70  |
| 3-Hexanone oxime                            | 125.60 | 34.19  | 35.89  | -1.70 |
| cis-1,2-Dimethylcyclopropane                | 87.50  | 23.74  | 25.44  | -1.70 |
| 1-Butyltetrahydrothiophenium dicyanamide    | 218.20 | 59.59  | 61.28  | -1.69 |
| 1-Pyrrolidineethanol                        | 121.40 | 33.04  | 34.73  | -1.69 |
| trans-2-Hepten-1-ol                         | 131.30 | 35.76  | 37.45  | -1.69 |
| 3-Methyldecane                              | 194.30 | 53.04  | 54.73  | -1.69 |
| trans-1,2-Dimethylcyclopropane              | 88.20  | 23.94  | 25.63  | -1.69 |
| Allyl chloroformate                         | 99.20  | 26.96  | 28.64  | -1.68 |
| Methoxytrimethylsilane                      | 113.20 | 30.80  | 32.48  | -1.68 |
| Ethyl 3,5-dinitrobenzoate                   | 192.00 | 55.78  | 54.10  | 1.68  |
| 5-Phenyl-1-pentanol                         | 174.50 | 50.98  | 49.30  | 1.68  |
| Phosphamidon                                | 253.00 | 69.15  | 70.83  | -1.68 |
| Chloro(methylthio)methane                   | 77.90  | 24.48  | 22.80  | 1.68  |
| N-Methyl-1,2-ethylenediamine                | 85.50  | 23.21  | 24.89  | -1.68 |
| 1,2-Diethylhydrazine                        | 103.00 | 28.01  | 29.69  | -1.68 |
| 2-Butylthiovinyl dibutoxy phosphorus oxide  | 303.40 | 86.33  | 84.65  | 1.68  |
| Propylsulfinyl chloride                     | 100.00 | 30.54  | 28.86  | 1.68  |
| 2-Propyl-1,4-diox-2-ene                     | 128.70 | 35.06  | 36.74  | -1.68 |
| Phenoxyacetylene                            | 115.90 | 34.90  | 33.23  | 1.67  |
| 4-Bromo-1-butene                            | 91.00  | 28.07  | 26.40  | 1.67  |
| 5-Methyl-2-hexanone oxime                   | 142.00 | 38.71  | 40.38  | -1.67 |
| 2-Methylpropylamine                         | 89.90  | 24.42  | 26.09  | -1.67 |
| Diisobutylsulfite                           | 185.20 | 50.56  | 52.23  | -1.67 |
| Butyltrichlorosilane                        | 146.10 | 43.18  | 41.51  | 1.67  |
| 1-Propyronitrile-3-octylimidazolium bromide | 282.20 | 80.51  | 78.84  | 1.67  |
| 2-Butoxyvinyl dimethoxy phosphorus oxide    | 196.20 | 53.58  | 55.25  | -1.67 |
| Phenyl dibutoxyborine                       | 248.70 | 71.32  | 69.65  | 1.67  |
| Dihexyl isophthalate                        | 338.50 | 95.95  | 94.28  | 1.67  |
| Propyl dichloroacetate                      | 135.20 | 36.85  | 38.52  | -1.67 |
| 2-Methyldecane                              | 194.70 | 53.17  | 54.84  | -1.67 |
| 1,1-Dimethylhydrazine                       | 69.10  | 18.72  | 20.39  | -1.67 |
| 2-Methyloctane                              | 161.70 | 44.12  | 45.79  | -1.67 |
| 2-Diethylaminoethylamine                    | 134.10 | 36.55  | 38.22  | -1.67 |

|                                           |        |        |        |       |
|-------------------------------------------|--------|--------|--------|-------|
| Ethyl 4-methoxybenzoate                   | 171.20 | 50.06  | 48.39  | 1.67  |
| 2-Methylanisole                           | 125.30 | 37.47  | 35.80  | 1.67  |
| Tris(2-ethylhexyl) aconitate              | 534.70 | 146.43 | 148.10 | -1.67 |
| s-Butylethylamine                         | 122.90 | 33.48  | 35.15  | -1.67 |
| 2-Dodecanone                              | 213.90 | 58.44  | 60.11  | -1.67 |
| Propanoyl chloride                        | 78.20  | 21.22  | 22.88  | -1.66 |
| Ethyl 5-bromovalerate                     | 158.70 | 43.30  | 44.96  | -1.66 |
| 1,3-Cycloheptadiene                       | 104.60 | 31.79  | 30.13  | 1.66  |
| Bis-N-(2-hydroxyethyl)-2-furfurylamine    | 177.00 | 48.32  | 49.98  | -1.66 |
| 1-Acetyl-4-piperidinone                   | 133.50 | 36.39  | 38.05  | -1.66 |
| 2-Chloro-p-cresol                         | 122.80 | 36.78  | 35.12  | 1.66  |
| 2-Pyridinemethanamine                     | 106.80 | 32.39  | 30.73  | 1.66  |
| 1-Ethylthio-1-propyne                     | 104.00 | 31.62  | 29.96  | 1.66  |
| 1,3-Dibromo-2-propanol                    | 107.10 | 32.47  | 30.81  | 1.66  |
| 5-Butylnonane                             | 227.00 | 62.04  | 63.70  | -1.66 |
| Dichloro(chloromethyl)methylsilane        | 113.30 | 34.17  | 32.51  | 1.66  |
| 1-Methyl-2-piperidone                     | 115.40 | 31.43  | 33.09  | -1.66 |
| alpha-Santalol                            | 233.80 | 67.22  | 65.56  | 1.66  |
| 4-Heptanone oxime                         | 142.30 | 38.81  | 40.47  | -1.66 |
| N-t-Butyl-N-nitrocarbamic acid ethylester | 172.30 | 47.04  | 48.69  | -1.65 |
| Propyl 2-hydroxybenzoate                  | 169.50 | 49.58  | 47.93  | 1.65  |
| Cetane                                    | 278.20 | 76.09  | 77.74  | -1.65 |
| Methyltri(2-octyloxy)silane               | 474.20 | 129.85 | 131.50 | -1.65 |
| Isopropylcyclopropane                     | 104.80 | 28.53  | 30.18  | -1.65 |
| 1,3-Dimethyl-2-oxo-hexahydro-pyrimidine   | 127.80 | 34.84  | 36.49  | -1.65 |
| Eps-Chlorocapronitrile                    | 126.70 | 34.54  | 36.19  | -1.65 |
| 3-Methylcyclopentanone                    | 102.60 | 27.93  | 29.58  | -1.65 |
| cis-2-Hexen-1-ol                          | 114.30 | 31.14  | 32.79  | -1.65 |
| 1,2-Dimethyl-5-propylpyrrole              | 151.20 | 44.55  | 42.91  | 1.64  |
| n-Undecylamine                            | 207.00 | 56.57  | 58.21  | -1.64 |
| Methyl bis(2,2-dimethylhydrazino)silane   | 166.70 | 48.80  | 47.16  | 1.64  |
| Isooctane                                 | 142.90 | 38.99  | 40.63  | -1.64 |
| Diisobutylamine                           | 156.90 | 42.83  | 44.47  | -1.64 |
| 2,2,3,4-Tetramethylhexane                 | 175.60 | 47.96  | 49.60  | -1.64 |
| 3-(Dibutylamino)propionitrile             | 207.10 | 56.60  | 58.24  | -1.64 |
| 2-Pyridinecarboxaldehyde                  | 98.20  | 30.01  | 28.37  | 1.64  |
| 3,3,5-Trimethylheptane                    | 175.70 | 47.99  | 49.63  | -1.64 |
| Guaiol                                    | 238.80 | 68.57  | 66.93  | 1.64  |
| Montanic acid                             | 490.40 | 134.31 | 135.94 | -1.63 |
| Methyl-1chloroethylether                  | 85.20  | 23.17  | 24.80  | -1.63 |
| Dichlorofluoromethane                     | 61.50  | 16.67  | 18.30  | -1.63 |
| N,N-Diethyl-3-methylbutanamide            | 173.90 | 47.50  | 49.13  | -1.63 |
| 2-Hydroxythiophene                        | 83.50  | 25.97  | 24.34  | 1.63  |
| Parasorbic acid                           | 107.10 | 29.18  | 30.81  | -1.63 |
| 1-Ethyl-1-methylcyclopropane              | 104.80 | 28.55  | 30.18  | -1.63 |
| 2,4-Xylenol                               | 125.40 | 37.46  | 35.83  | 1.63  |
| Trimethylsilanol                          | 96.30  | 26.22  | 27.85  | -1.63 |
| 1,3-Dimethoxybenzene                      | 135.10 | 40.12  | 38.49  | 1.63  |
| 2-Bromo-1,1-dimethoxyethane               | 115.40 | 31.46  | 33.09  | -1.63 |

|                                      |        |        |        |       |
|--------------------------------------|--------|--------|--------|-------|
| Methoxytriethylsilane                | 162.90 | 44.49  | 46.12  | -1.63 |
| cis-2-Bromo-2-butene                 | 89.90  | 27.72  | 26.09  | 1.63  |
| 2-Fluoroaniline                      | 99.60  | 30.38  | 28.75  | 1.63  |
| t-Butylhypochlorite                  | 101.50 | 27.65  | 29.28  | -1.63 |
| 1-Dodecen-3-yne                      | 195.60 | 56.71  | 55.09  | 1.62  |
| Anisyl methyl ketone                 | 160.50 | 47.08  | 45.46  | 1.62  |
| 2,5,5-Trimethylheptane               | 177.10 | 48.39  | 50.01  | -1.62 |
| 3-Methylundecane                     | 211.00 | 57.69  | 59.31  | -1.62 |
| 3-Nitrobenzylalcohol                 | 131.50 | 39.12  | 37.50  | 1.62  |
| DEHP                                 | 403.70 | 113.78 | 112.16 | 1.62  |
| Diethyl diethylaminosilane           | 179.70 | 52.34  | 50.72  | 1.62  |
| cis-Tetrahydro-2,5-dimethylthiophene | 119.40 | 35.80  | 34.19  | 1.61  |
| 2,2,6-Trimethylcyclohexanone         | 151.70 | 41.43  | 43.04  | -1.61 |
| Pulegone                             | 159.70 | 46.85  | 45.24  | 1.61  |
| (2-Bromoethyl)cyclohexane            | 151.90 | 44.71  | 43.10  | 1.61  |
| Butanoyl chloride                    | 94.70  | 25.80  | 27.41  | -1.61 |
| Diethyl sulfite                      | 119.20 | 32.52  | 34.13  | -1.61 |
| 1-Pentyne                            | 85.00  | 23.14  | 24.75  | -1.61 |
| Dipropoxy propyl phosphorus          | 200.50 | 54.82  | 56.43  | -1.61 |
| 2-Nitro-1-propene                    | 79.20  | 21.55  | 23.16  | -1.61 |
| 1-Methyl-1-isopropylhydrazine        | 101.80 | 27.75  | 29.36  | -1.61 |
| 2-Propyl-5-butylpyrrole              | 184.00 | 53.51  | 51.90  | 1.61  |
| Neomenthol                           | 174.60 | 47.72  | 49.33  | -1.61 |
| Diisopropyl sulfide                  | 129.50 | 38.56  | 36.96  | 1.60  |
| 2-Pyridinecarbonitrile               | 96.40  | 29.48  | 27.88  | 1.60  |
| N-Methyl-2-pyrrolidone               | 98.90  | 26.96  | 28.56  | -1.60 |
| 1-Dodecylphosphine                   | 234.00 | 67.22  | 65.62  | 1.60  |
| Piazthiole                           | 63.60  | 20.48  | 18.88  | 1.60  |
| 4-Propyloctane                       | 193.90 | 53.02  | 54.62  | -1.60 |
| 3-Ethyl-2-methylhexane               | 159.30 | 43.53  | 45.13  | -1.60 |
| Octyl phenyl ether                   | 226.10 | 65.05  | 63.45  | 1.60  |
| Propyl thioformate                   | 100.10 | 30.49  | 28.89  | 1.60  |
| 2,5-Dimethyloctane                   | 178.00 | 48.66  | 50.26  | -1.60 |
| 3-(Methylthio)-1-propene             | 91.50  | 28.13  | 26.53  | 1.60  |
| Nitrophenylmethane                   | 122.60 | 36.66  | 35.06  | 1.60  |
| Methyl (Z) 9-octadecenoate           | 334.40 | 91.56  | 93.16  | -1.60 |
| 3-Penten-2-ol                        | 97.60  | 26.61  | 28.21  | -1.60 |
| Triallylamine                        | 155.20 | 45.60  | 44.00  | 1.60  |
| 2-Methylcyclohexanone                | 119.00 | 32.48  | 34.08  | -1.60 |
| n-Dodecylamine                       | 223.70 | 61.20  | 62.79  | -1.59 |
| 3-Ethyl-2,4-pentanedione             | 130.00 | 35.50  | 37.09  | -1.59 |
| Bromocyclohexane                     | 118.90 | 35.64  | 34.05  | 1.59  |
| 4-Chloro-1-trifluoromethoxybenzene   | 137.50 | 37.56  | 39.15  | -1.59 |
| Chloro ethylthio propylborane        | 142.90 | 42.22  | 40.63  | 1.59  |
| Ethylsulfinyl chloride               | 83.40  | 25.90  | 24.31  | 1.59  |
| alpha-Nitroisopropylbenzene          | 155.30 | 45.62  | 44.03  | 1.59  |
| Octodrine                            | 156.30 | 42.72  | 44.31  | -1.59 |
| Cedrol                               | 233.00 | 66.93  | 65.34  | 1.59  |
| 1,2-Diethoxybenzene                  | 168.40 | 49.21  | 47.63  | 1.58  |



|                                    |        |        |        |       |
|------------------------------------|--------|--------|--------|-------|
| Dimethylethylsilanol               | 112.80 | 30.79  | 32.37  | -1.58 |
| 1-Phenyl-2-methylpropanol          | 157.50 | 46.22  | 44.64  | 1.58  |
| Cyclohexanethiol                   | 119.00 | 35.66  | 34.08  | 1.58  |
| Crotonic acid                      | 84.10  | 22.92  | 24.50  | -1.58 |
| p-Cresol                           | 108.80 | 32.86  | 31.28  | 1.58  |
| 3-Trifluoromethylbenzonitrile      | 131.60 | 35.95  | 37.53  | -1.58 |
| 1,2,2,3-Tetrachloropropane         | 117.70 | 35.30  | 33.72  | 1.58  |
| 2,5-Dimethylundecane               | 226.90 | 62.09  | 63.67  | -1.58 |
| Anisole                            | 109.10 | 32.94  | 31.36  | 1.58  |
| Angelic acid                       | 99.00  | 27.01  | 28.59  | -1.58 |
| 2,2,3,3-Tetramethylhexane          | 176.00 | 48.13  | 49.71  | -1.58 |
| 2,2,3,4-Tetramethylpentane         | 158.90 | 43.44  | 45.02  | -1.58 |
| Acetylchloride                     | 61.70  | 16.78  | 18.36  | -1.58 |
| Butyl diethyl phosphine oxide      | 174.50 | 47.72  | 49.30  | -1.58 |
| alpha-Phellandrene                 | 154.10 | 45.28  | 43.70  | 1.58  |
| 1,2-Diethylpyridinium ethylsulfate | 235.60 | 64.48  | 66.06  | -1.58 |
| Phenyl O-methyl phosphonic acid    | 138.90 | 41.11  | 39.53  | 1.58  |
| 1,2-Dipiperidinoethane             | 213.10 | 61.46  | 59.89  | 1.57  |
| Decyl vinyl ether                  | 216.30 | 59.19  | 60.76  | -1.57 |
| Dichlorofluorophosphorus oxide     | 72.50  | 19.75  | 21.32  | -1.57 |
| 1-Hexyne                           | 101.70 | 27.76  | 29.33  | -1.57 |
| Tetraethylmethane                  | 157.70 | 43.12  | 44.69  | -1.57 |
| 2,3-Dimethyl-1,3-butadiene         | 98.20  | 29.94  | 28.37  | 1.57  |
| Ethoxytriethylsilane               | 179.50 | 49.10  | 50.67  | -1.57 |
| Pentadecane                        | 261.60 | 71.62  | 73.19  | -1.57 |
| 3-Chloro-2-butanone                | 94.00  | 25.65  | 27.22  | -1.57 |
| 5-Aminomethyl-1,3-benzodioxole     | 136.60 | 40.47  | 38.90  | 1.57  |
| trans-2-Bromo-2-butene             | 90.30  | 27.77  | 26.20  | 1.57  |
| 3-Mercaptopropyl-trimethoxysilane  | 180.80 | 49.46  | 51.03  | -1.57 |
| Elaidic acid                       | 317.30 | 86.90  | 88.47  | -1.57 |
| Tetra-2-pentoxysilane              | 397.80 | 108.98 | 110.55 | -1.57 |
| 4,5-Dichloro-1,3-dioxolan-2-one    | 99.60  | 27.19  | 28.75  | -1.56 |
| Butyl 4-toluenesulfonate           | 207.20 | 59.83  | 58.27  | 1.56  |
| Furfuranol                         | 91.50  | 24.97  | 26.53  | -1.56 |
| 2-Isopropyltetrahydropyran         | 141.30 | 38.63  | 40.19  | -1.56 |
| 2-Methylcyclopentanone             | 102.90 | 28.10  | 29.66  | -1.56 |
| 1,2-Diisobutylhydrazine            | 169.40 | 46.34  | 47.90  | -1.56 |
| ((3-Methylbutoxy)methyl)benzene    | 191.90 | 55.63  | 54.07  | 1.56  |
| m-Cresylacetate                    | 142.90 | 42.19  | 40.63  | 1.56  |
| Methylvinylchlorosilane            | 110.60 | 33.33  | 31.77  | 1.56  |
| Ethylthiodiethylborane             | 145.20 | 42.82  | 41.26  | 1.56  |
| cis-1,2-Divinylcyclobutane         | 123.00 | 36.73  | 35.17  | 1.56  |
| 4-Ethylpyridine                    | 111.30 | 33.52  | 31.96  | 1.56  |
| 2-Butyne                           | 68.40  | 18.64  | 20.20  | -1.56 |
| 2,2-Dimethylcyclohexanone          | 135.30 | 36.99  | 38.55  | -1.56 |
| Phenethyl alcohol                  | 124.50 | 37.14  | 35.58  | 1.56  |
| Dimethyldidodecyloxysilane         | 486.90 | 133.43 | 134.98 | -1.55 |
| 4-Methyldecane                     | 193.70 | 53.01  | 54.56  | -1.55 |
| 2-Bromofuran                       | 84.30  | 26.11  | 24.56  | 1.55  |

|                                           |        |       |       |       |
|-------------------------------------------|--------|-------|-------|-------|
| 2-Butyltetrahydropyran                    | 158.40 | 43.33 | 44.88 | -1.55 |
| 3,5-Lupetidine                            | 129.30 | 35.35 | 36.90 | -1.55 |
| Isopropyl palmitate                       | 339.30 | 92.95 | 94.50 | -1.55 |
| 3,4-Dimethoxytoluene                      | 151.10 | 44.43 | 42.88 | 1.55  |
| 3-Ethyldecane                             | 210.60 | 57.65 | 59.20 | -1.55 |
| Methylsulfinyl chloride                   | 66.70  | 21.28 | 19.73 | 1.55  |
| 1-Acetoxy-3-(2-furyl)propane              | 160.10 | 43.80 | 45.35 | -1.55 |
| s-Phenethyl alcohol                       | 124.20 | 37.05 | 35.50 | 1.55  |
| 2-Butanone O-propyloxime                  | 143.00 | 39.11 | 40.66 | -1.55 |
| N-Methylpropargylamine                    | 80.40  | 21.94 | 23.49 | -1.55 |
| trans-3-Pentenitrile                      | 90.20  | 24.63 | 26.18 | -1.55 |
| 2,2,5-Trimethylhexane                     | 160.60 | 43.94 | 45.49 | -1.55 |
| 2,2,4-Trimethylhexane                     | 161.00 | 44.05 | 45.60 | -1.55 |
| Decamethylcyclopentasiloxane              | 329.40 | 93.33 | 91.78 | 1.55  |
| 2-Methyl-2-phenyloxirane                  | 135.30 | 40.09 | 38.55 | 1.54  |
| Thioglycerol                              | 97.70  | 26.69 | 28.23 | -1.54 |
| 1-Methyl-1-propylhydrazine                | 102.40 | 27.98 | 29.52 | -1.54 |
| Phenyl diethoxyborine                     | 181.90 | 52.87 | 51.33 | 1.54  |
| S-Ethyl chlorothioformate                 | 97.50  | 29.72 | 28.18 | 1.54  |
| 2-Methoxy-4-methyl-1,3,2-dioxaphospholane | 115.30 | 31.52 | 33.06 | -1.54 |
| Bis(ethylisobutyl)disiloxane              | 269.70 | 76.95 | 75.41 | 1.54  |
| 3-Fluoroaniline                           | 99.70  | 30.32 | 28.78 | 1.54  |
| Diethylphosphine                          | 100.80 | 30.62 | 29.08 | 1.54  |
| 2-Bromoethanesulfonylchloride             | 109.70 | 33.06 | 31.52 | 1.54  |
| N-(Hydroxyethyl)piperazine                | 133.40 | 36.49 | 38.03 | -1.54 |
| Tridecylamine                             | 240.40 | 65.84 | 67.37 | -1.53 |
| Thiazole                                  | 70.30  | 22.25 | 20.72 | 1.53  |
| Propyltrichlorosilane                     | 129.40 | 38.46 | 36.93 | 1.53  |
| trans,trans-2,4-Hexadiene                 | 100.10 | 30.42 | 28.89 | 1.53  |
| 4-Methyloxazole                           | 77.70  | 21.22 | 22.75 | -1.53 |
| 2,5-Dimethylhexane                        | 144.20 | 39.46 | 40.99 | -1.53 |
| 1-Acetoxy-2-methyl-3-(2-furyl)propane     | 176.10 | 48.21 | 49.74 | -1.53 |
| 1-Vinylcyclohexene                        | 121.80 | 36.37 | 34.84 | 1.53  |
| Ethyl dimethylamine                       | 89.80  | 24.54 | 26.07 | -1.53 |
| 3,6-Dimethyloctane                        | 177.30 | 48.54 | 50.07 | -1.53 |
| 4-Ethylheptane                            | 160.20 | 43.85 | 45.38 | -1.53 |
| Isobutyroylchloride                       | 94.50  | 25.83 | 27.36 | -1.53 |
| 2-Vinyl-1,4-dioxane                       | 111.30 | 30.44 | 31.96 | -1.52 |
| 2-t-Butyltetrahydropyran                  | 158.00 | 43.25 | 44.77 | -1.52 |
| 5-Methyldodecane                          | 226.90 | 62.15 | 63.67 | -1.52 |
| 3,4-Dihydro-4H-pyran                      | 88.10  | 24.08 | 25.60 | -1.52 |
| Isopropyl chloroacetate                   | 120.40 | 32.94 | 34.46 | -1.52 |
| 2-Bromo-2-chloropropane                   | 93.90  | 28.71 | 27.19 | 1.52  |
| Chloroprene                               | 81.40  | 25.28 | 23.76 | 1.52  |
| 5-Methylundecane                          | 210.30 | 57.60 | 59.12 | -1.52 |
| 4-Methyl-2-pentenoic acid                 | 117.40 | 32.12 | 33.64 | -1.52 |
| Ethyl 4-bromoacetoacetate                 | 143.90 | 39.39 | 40.91 | -1.52 |
| 5-Methyldecane                            | 193.70 | 53.05 | 54.56 | -1.51 |

|                                           |        |       |       |       |
|-------------------------------------------|--------|-------|-------|-------|
| 3-(Dipentylamino)propionitrile            | 240.40 | 65.86 | 67.37 | -1.51 |
| 2-Methyl-1,2-propanediamine               | 101.20 | 27.68 | 29.19 | -1.51 |
| 2,7-Dimethyloctane                        | 178.20 | 48.80 | 50.31 | -1.51 |
| 2,2-Dimethyloctane                        | 177.90 | 48.72 | 50.23 | -1.51 |
| Cyclopentane                              | 84.60  | 23.13 | 24.64 | -1.51 |
| Methyl tiglate                            | 116.90 | 31.99 | 33.50 | -1.51 |
| 2,5-Dipropylpyrrole                       | 167.40 | 48.86 | 47.35 | 1.51  |
| 2,3,4-Trimethylhexane                     | 159.30 | 43.62 | 45.13 | -1.51 |
| 3,4-Dichloro-1,4-dioxane                  | 114.60 | 31.36 | 32.87 | -1.51 |
| 5-Methylisoxazole                         | 78.10  | 21.35 | 22.86 | -1.51 |
| cis-1,3-Pentadiene                        | 83.30  | 25.79 | 24.28 | 1.51  |
| 1,3,5-Cycloheptatriene                    | 107.00 | 32.29 | 30.78 | 1.51  |
| 3,5-Dimethylisoxazole                     | 94.90  | 25.96 | 27.47 | -1.51 |
| 4-Methylcyclohexanone                     | 119.40 | 32.68 | 34.19 | -1.51 |
| 1-Penten-3-one                            | 91.80  | 25.11 | 26.61 | -1.50 |
| N-Nitrosodihexylamine                     | 239.20 | 65.54 | 67.04 | -1.50 |
| Bis(chloromethyl)ether                    | 82.90  | 22.67 | 24.17 | -1.50 |
| 4-Chloro-1,2-butadiene                    | 81.60  | 25.32 | 23.82 | 1.50  |
| 6-Bromoundecane                           | 213.00 | 61.36 | 59.86 | 1.50  |
| 4-Ethyl-2-methylhexane                    | 160.00 | 43.82 | 45.32 | -1.50 |
| 2,2,6-Trimethylheptane                    | 177.90 | 48.73 | 50.23 | -1.50 |
| Diethylmethylsilanol                      | 129.40 | 35.43 | 36.93 | -1.50 |
| N-(2-Hydroxyethyl)-2-furfurylamine        | 136.40 | 37.35 | 38.85 | -1.50 |
| 2-Chloro-2-nitropropane                   | 98.70  | 27.01 | 28.51 | -1.50 |
| 1-Cyclopropyl-1,4-cyclohexadiene          | 130.70 | 38.78 | 37.28 | 1.50  |
| Pentyl benzoate                           | 195.60 | 56.58 | 55.09 | 1.49  |
| 3-Pentanone O-propyloxime                 | 159.90 | 43.80 | 45.29 | -1.49 |
| 3-Methyl-1-hexylamine                     | 139.30 | 38.15 | 39.64 | -1.49 |
| Methyl 3-(methylthio)propanoate           | 125.80 | 34.45 | 35.94 | -1.49 |
| beta-Phellandrene                         | 154.60 | 45.33 | 43.84 | 1.49  |
| 4-Fluoro-2-methylaniline                  | 115.70 | 34.66 | 33.17 | 1.49  |
| m-Cresol                                  | 109.00 | 32.82 | 31.33 | 1.49  |
| Nornicotine                               | 146.70 | 43.16 | 41.67 | 1.49  |
| 2-Cyclopentylidenecyclopentanone          | 153.30 | 44.97 | 43.48 | 1.49  |
| 1-Bromo-1-pentyne                         | 103.50 | 31.31 | 29.82 | 1.49  |
| 2,2,4-Trimethylcyclopentanone             | 135.70 | 37.17 | 38.66 | -1.49 |
| 7,8-Dimethyltetradecane                   | 276.50 | 75.79 | 77.28 | -1.49 |
| Methyl chloride                           | 42.40  | 11.58 | 13.07 | -1.49 |
| 1-Methyltetrahydrothiophenium dicyanamide | 168.40 | 46.14 | 47.63 | -1.49 |
| Ethyltrichlorosilane                      | 112.70 | 33.83 | 32.35 | 1.48  |
| 3-(Diethylamino)-1-propanol               | 147.90 | 40.52 | 42.00 | -1.48 |
| 4-Hexen-2-ol                              | 114.50 | 31.36 | 32.84 | -1.48 |
| 3-Hexanone ketazine                       | 222.30 | 63.89 | 62.41 | 1.48  |
| 1-Heptyne                                 | 118.40 | 32.43 | 33.91 | -1.48 |
| Tetrahydro-3-methyl-2H-thiopyran          | 119.20 | 35.61 | 34.13 | 1.48  |
| Allyl methacrylate                        | 129.00 | 35.34 | 36.82 | -1.48 |
| Dimethyl chlorothiophosphate              | 115.60 | 34.62 | 33.14 | 1.48  |
| N,N-Diisobutylaminotriethylsilane         | 276.20 | 78.67 | 77.19 | 1.48  |
| 4-(2-Furanyl)-2-butanone                  | 135.70 | 37.18 | 38.66 | -1.48 |

|                                         |        |        |        |       |
|-----------------------------------------|--------|--------|--------|-------|
| Glutaconodinitrile                      | 91.40  | 25.03  | 26.51  | -1.48 |
| 1-Tetradecylamine                       | 257.10 | 70.48  | 71.95  | -1.47 |
| Fluorotripentylsilane                   | 292.90 | 80.30  | 81.77  | -1.47 |
| 1-Formylpiperidine                      | 115.60 | 31.67  | 33.14  | -1.47 |
| Cyclohexylisocyanate                    | 126.50 | 34.66  | 36.13  | -1.47 |
| 2-Chloro-1-trifluoromethoxybenzene      | 137.40 | 37.65  | 39.12  | -1.47 |
| 2-Hydroxy-1-phenyl-1-propanone          | 143.40 | 42.24  | 40.77  | 1.47  |
| 1-Methyl-1-butylhydrazine               | 119.20 | 32.66  | 34.13  | -1.47 |
| Isocrotonic acid                        | 81.50  | 22.32  | 23.79  | -1.47 |
| Dibromofluoromethane                    | 69.80  | 22.05  | 20.58  | 1.47  |
| Suberone                                | 118.10 | 32.36  | 33.83  | -1.47 |
| 2-Propyl-6-methyl-1,4-diox-2-ene        | 145.00 | 39.74  | 41.21  | -1.47 |
| Tetradecyl trihexylphosphonium chloride | 595.80 | 166.32 | 164.85 | 1.47  |
| 3-Methylcyclohexanone                   | 119.40 | 32.72  | 34.19  | -1.47 |
| Benzyl methyl ether                     | 125.60 | 37.35  | 35.89  | 1.46  |
| 4-Methyltridecane                       | 243.50 | 66.76  | 68.22  | -1.46 |
| 4-Pyridinemethanamine                   | 106.50 | 32.11  | 30.65  | 1.46  |
| 1,1-Diethylhydrazine                    | 102.00 | 27.95  | 29.41  | -1.46 |
| 3-Methyl-1-butyne                       | 84.90  | 23.26  | 24.72  | -1.46 |
| N-Octyl-2-pyrrolidone                   | 216.00 | 59.22  | 60.68  | -1.46 |
| Phenylacetoneitrile                     | 116.90 | 34.96  | 33.50  | 1.46  |
| Allylacrylate                           | 112.40 | 30.81  | 32.27  | -1.46 |
| t-Amyl mercaptan                        | 112.40 | 33.72  | 32.27  | 1.45  |
| 3-Methyltridecane                       | 243.50 | 66.77  | 68.22  | -1.45 |
| 2,4-Diethylpyrrole                      | 134.10 | 39.67  | 38.22  | 1.45  |
| O-Ethyl pentanoic imino ester           | 143.60 | 39.37  | 40.82  | -1.45 |
| 3-Bromofuran                            | 84.30  | 26.01  | 24.56  | 1.45  |
| 2,4-Dimethyl-3-ethylpentane             | 158.40 | 43.43  | 44.88  | -1.45 |
| 1-(2-Pyridinyl)ethanone                 | 114.20 | 34.21  | 32.76  | 1.45  |
| 2-Pentanone O-propyloxime               | 160.00 | 43.87  | 45.32  | -1.45 |
| o-Cumenol                               | 141.40 | 41.67  | 40.22  | 1.45  |
| Sulcatol                                | 147.20 | 40.36  | 41.81  | -1.45 |
| 4-Propylnonane                          | 210.20 | 57.64  | 59.09  | -1.45 |
| 1-Chlorononane                          | 176.00 | 48.26  | 49.71  | -1.45 |
| Tris(ethylamino)borane                  | 164.40 | 45.08  | 46.53  | -1.45 |
| 2-Propyltetrahydropyran                 | 141.10 | 38.69  | 40.14  | -1.45 |
| Benzyl ethyl ether                      | 142.40 | 41.94  | 40.49  | 1.45  |
| 2-Ethyl-5-propylthiophane sulfone       | 181.20 | 49.69  | 51.14  | -1.45 |
| Diethylamino chlorofluorophosphate      | 133.00 | 36.47  | 37.92  | -1.45 |
| 1-Methyl-2-ethyl-5-propylpyrrole        | 167.60 | 48.85  | 47.41  | 1.44  |
| N-Methylpyrrolidine                     | 96.90  | 26.57  | 28.01  | -1.44 |
| 2-Methyldodecane                        | 227.20 | 62.31  | 63.75  | -1.44 |
| cis-1,4-Dimethylcyclohexane             | 133.10 | 36.50  | 37.94  | -1.44 |
| Bromoacetic acid                        | 74.50  | 20.43  | 21.87  | -1.44 |
| Tripentylsilane                         | 286.80 | 81.54  | 80.10  | 1.44  |
| 3,5-Dimethoxytoluene                    | 151.40 | 44.40  | 42.96  | 1.44  |
| Pyrrolidine                             | 80.10  | 21.97  | 23.41  | -1.44 |
| Butyldimethylamine                      | 123.30 | 33.82  | 35.25  | -1.43 |
| 2,3-Dimethyl-3-ethylpentane             | 158.30 | 43.42  | 44.85  | -1.43 |

|                                                  |        |        |        |       |
|--------------------------------------------------|--------|--------|--------|-------|
| 2-Hydroxybicyclopentyl                           | 165.70 | 45.45  | 46.88  | -1.43 |
| 1,2-Cycloheptanedione                            | 121.00 | 33.19  | 34.62  | -1.43 |
| Tetracosane                                      | 412.30 | 113.09 | 114.52 | -1.43 |
| 2,3-Dichloro-1-propanol                          | 98.50  | 27.02  | 28.45  | -1.43 |
| 1-Octyne                                         | 135.10 | 37.06  | 38.49  | -1.43 |
| 2,3-Dimethylnonane                               | 193.10 | 52.97  | 54.40  | -1.43 |
| Bromoethylene                                    | 58.10  | 18.80  | 17.37  | 1.43  |
| (Methylthio)ethene                               | 75.20  | 23.49  | 22.06  | 1.43  |
| Bis(2-hydroxyethyl) sulfide                      | 115.00 | 31.55  | 32.98  | -1.43 |
| Ethyl 2,3-dichloropropionate                     | 134.60 | 36.93  | 38.35  | -1.42 |
| Triethylsilyloxytripropylsilane                  | 318.40 | 90.19  | 88.77  | 1.42  |
| 1-Nonen-3-yne                                    | 145.70 | 42.82  | 41.40  | 1.42  |
| 1,3-Bis(dimethylamino)-2-propanol                | 160.40 | 44.01  | 45.43  | -1.42 |
| 2-Propyl-4-methylpyrrole                         | 134.00 | 39.61  | 38.19  | 1.42  |
| 1-Chloro-3-fluorobenzene                         | 102.50 | 30.97  | 29.55  | 1.42  |
| 2-Methylundecane                                 | 210.60 | 57.78  | 59.20  | -1.42 |
| Ethylcyclobutane                                 | 102.50 | 28.13  | 29.55  | -1.42 |
| Dichloro butoxyborine                            | 131.30 | 36.03  | 37.45  | -1.42 |
| 1-Acetoxy-2-ethyl-3-(2-furyl)propane             | 192.40 | 52.79  | 54.21  | -1.42 |
| 1-Methyl-1-isobutylhydrazine                     | 119.00 | 32.66  | 34.08  | -1.42 |
| 2-(Bromomethoxy)heptane                          | 172.30 | 50.11  | 48.69  | 1.42  |
| 2-Ethoxyvinyl bis(dibutylamino) phosphorus oxide | 392.00 | 110.37 | 108.96 | 1.41  |
| 2,2-Dichloroethanol                              | 82.10  | 22.54  | 23.95  | -1.41 |
| Ethyl isocrotonate                               | 115.60 | 31.73  | 33.14  | -1.41 |
| 2-Ethyl-5-methylthiophane sulfone                | 148.70 | 40.81  | 42.22  | -1.41 |
| 2-Ethoxy-4-methyl-1,3,2-dioxaphospholane         | 132.00 | 36.23  | 37.64  | -1.41 |
| 3-Methyldodecane                                 | 226.90 | 62.26  | 63.67  | -1.41 |
| 1,1,2,2-Tetrachloroethane                        | 101.30 | 30.63  | 29.22  | 1.41  |
| Dioctyl isophthalate                             | 405.00 | 113.93 | 112.52 | 1.41  |
| 6-Methylundecane                                 | 210.30 | 57.71  | 59.12  | -1.41 |
| 1-Chloropropane                                  | 75.80  | 20.82  | 22.23  | -1.41 |
| Fumaric acid dichloride                          | 106.20 | 31.97  | 30.56  | 1.41  |
| Ethyl bromoacetate                               | 108.50 | 29.79  | 31.20  | -1.41 |
| Triethyl 2,2-diethylhydrazinosilane              | 224.80 | 64.50  | 63.09  | 1.41  |
| 2-Ethyl-5-propylpyrrole                          | 150.90 | 44.23  | 42.83  | 1.40  |
| 3-Methylsulfolane                                | 116.30 | 31.93  | 33.33  | -1.40 |
| Pentadecylamine                                  | 273.80 | 75.13  | 76.53  | -1.40 |
| (Bromomethyl)cyclohexane                         | 135.30 | 39.95  | 38.55  | 1.40  |
| cis-1,4-Dichloro-2-butene                        | 100.30 | 30.35  | 28.95  | 1.40  |
| Thiamorpholine                                   | 97.90  | 29.69  | 28.29  | 1.40  |
| Butyldi(3-acetoxypropyl)phosphine thioxide       | 307.50 | 87.18  | 85.78  | 1.40  |
| 2,4-Dimethylheptane                              | 160.40 | 44.03  | 45.43  | -1.40 |
| 4-Methyldodecane                                 | 226.90 | 62.27  | 63.67  | -1.40 |
| 1-Decen-3-yne                                    | 162.40 | 47.38  | 45.98  | 1.40  |
| 2-(2-Methoxyethyl)pyridine                       | 137.90 | 40.66  | 39.26  | 1.40  |
| 1-Chloro-2-fluorobenzene                         | 102.50 | 30.95  | 29.55  | 1.40  |
| Triisopropylsilyl chloride                       | 200.10 | 57.72  | 56.32  | 1.40  |
| 7-Methyl-1,5,7-triazabicyclo(4,4,0)dec-5-ene     | 153.40 | 44.91  | 43.51  | 1.40  |

|                                                       |        |       |        |       |
|-------------------------------------------------------|--------|-------|--------|-------|
| Ethyl 2-bromopropionate                               | 125.10 | 34.35 | 35.75  | -1.40 |
| 4-Morpholinepropanamine                               | 150.40 | 41.29 | 42.69  | -1.40 |
| Diisopropylamine                                      | 122.80 | 33.72 | 35.12  | -1.40 |
| 1-Heptadecylamine                                     | 307.20 | 84.30 | 85.70  | -1.40 |
| 1-Bromo-2-t-butylacetylene                            | 119.80 | 35.69 | 34.29  | 1.40  |
| 7-Butyltridecane                                      | 293.70 | 80.60 | 81.99  | -1.39 |
| Bornyl acetate                                        | 200.40 | 55.01 | 56.40  | -1.39 |
| 2-Propyl-2,3-dihydrofuran                             | 121.10 | 33.26 | 34.65  | -1.39 |
| Amylsulfinyl chloride                                 | 133.20 | 39.36 | 37.97  | 1.39  |
| Trichloroethylene                                     | 82.20  | 25.37 | 23.98  | 1.39  |
| Cyclooctane                                           | 133.70 | 36.72 | 38.11  | -1.39 |
| Ethyldimethyl 1-(3-pentoxo)ethoxysilane               | 236.40 | 64.89 | 66.28  | -1.39 |
| 1-Phenyl-1-propanol                                   | 141.20 | 41.55 | 40.16  | 1.39  |
| n-Butylbenzoate                                       | 178.90 | 51.89 | 50.51  | 1.38  |
| Carvone                                               | 156.30 | 45.69 | 44.31  | 1.38  |
| 3-Pentanone O-ethyloxime                              | 142.80 | 39.22 | 40.60  | -1.38 |
| Dichloro neopentoxymorine                             | 147.50 | 40.51 | 41.89  | -1.38 |
| Methyl phosphorodichloridite                          | 86.60  | 26.57 | 25.19  | 1.38  |
| Trihexyl phosphite                                    | 359.90 | 98.77 | 100.15 | -1.38 |
| 2-Pentanone O-ethyloxime                              | 143.30 | 39.36 | 40.74  | -1.38 |
| 4-s-Butylphenol                                       | 158.10 | 46.18 | 44.80  | 1.38  |
| 1-Hexen-5-one                                         | 108.00 | 29.68 | 31.06  | -1.38 |
| Dipropyl isophthalate                                 | 238.90 | 68.34 | 66.96  | 1.38  |
| 4-Methylundecane                                      | 210.30 | 57.74 | 59.12  | -1.38 |
| cis-1,3-Dichloro-2-butene                             | 100.00 | 30.24 | 28.86  | 1.38  |
| trans-1,4-Dimethylcyclohexane                         | 133.80 | 36.76 | 38.13  | -1.37 |
| Cyanoethylene                                         | 57.20  | 15.75 | 17.12  | -1.37 |
| o-Cresylacetate                                       | 142.70 | 41.95 | 40.58  | 1.37  |
| 1-Phenyl-2,3,5-trimethylpyrazolium<br>methylsulfonate | 250.50 | 68.77 | 70.14  | -1.37 |
| Trichloroacetylchloride                               | 103.80 | 31.28 | 29.91  | 1.37  |
| trans-1,3-Dimethylcyclohexane                         | 133.10 | 36.57 | 37.94  | -1.37 |
| Methylsalicylate                                      | 136.00 | 40.11 | 38.74  | 1.37  |
| 2-Propoxy-4-methyl-1,3,2-dioxaphospholane             | 148.70 | 40.85 | 42.22  | -1.37 |
| 2-Butanone O-ethyloxime                               | 126.20 | 34.68 | 36.05  | -1.37 |
| Dibutylboronic anhydride                              | 314.90 | 86.44 | 87.81  | -1.37 |
| Ethoxytrimethylsilane                                 | 129.80 | 35.67 | 37.04  | -1.37 |
| N-Methylmorpholine                                    | 105.70 | 29.06 | 30.43  | -1.37 |
| 1,1,3,3-Tetramethylguanidinium pentanoate             | 221.60 | 60.85 | 62.22  | -1.37 |
| 3,4,5-Trimethylheptane                                | 175.40 | 48.18 | 49.55  | -1.37 |
| Dibutylbutylaminoborane                               | 239.20 | 65.68 | 67.04  | -1.36 |
| Dimethyldi(2-ethylbutoxy)silane                       | 285.10 | 78.27 | 79.63  | -1.36 |
| Acetoxime O-methyl ether                              | 77.10  | 21.22 | 22.58  | -1.36 |
| Heptadecane                                           | 294.90 | 80.96 | 82.32  | -1.36 |
| 1-Chlorobut-1-yn-3-ene                                | 76.90  | 23.89 | 22.53  | 1.36  |
| 3-Methyl-2-butenoyl chloride                          | 104.50 | 31.46 | 30.10  | 1.36  |
| trans-1,4-Dichloro-2-butene                           | 100.60 | 30.39 | 29.03  | 1.36  |
| 4-Acetylpyridine                                      | 113.80 | 34.01 | 32.65  | 1.36  |
| Camphene                                              | 148.40 | 43.50 | 42.14  | 1.36  |

|                                             |        |        |        |       |
|---------------------------------------------|--------|--------|--------|-------|
| 3-Fluorobenzaldehyde                        | 107.50 | 32.28  | 30.92  | 1.36  |
| Diethyl thiophosphoryl chloride             | 149.10 | 43.69  | 42.33  | 1.36  |
| Ethyl mercaptoacetate                       | 108.80 | 29.92  | 31.28  | -1.36 |
| 2,4-Dimethylnonane                          | 193.20 | 53.07  | 54.43  | -1.36 |
| 3,5-Dimethyl-1-hexen-3-ol                   | 145.00 | 39.85  | 41.21  | -1.36 |
| 1-Bromo-4-chlorobutane                      | 110.90 | 33.21  | 31.85  | 1.36  |
| 4,4-Dimethyl-1-pentene                      | 121.70 | 33.46  | 34.82  | -1.36 |
| Propyl 4-toluenesulfonate                   | 190.60 | 55.07  | 53.71  | 1.36  |
| Hexadecylamine                              | 290.50 | 79.76  | 81.12  | -1.36 |
| 2-Ethylthiovinyl dipropoxy phosphorus oxide | 237.20 | 67.85  | 66.50  | 1.35  |
| Bromocycloheptane                           | 134.90 | 39.79  | 38.44  | 1.35  |
| 1,1,2-Trimethylcyclopropane                 | 104.30 | 28.69  | 30.04  | -1.35 |
| Octanoyl chloride                           | 161.50 | 44.38  | 45.73  | -1.35 |
| 2-Bromo-1-butene                            | 90.50  | 27.61  | 26.26  | 1.35  |
| 2-(2-(1-Methylethoxy)ethyl)pyridine         | 170.60 | 49.58  | 48.23  | 1.35  |
| Methyl 3,3-dimethylacrylate                 | 115.30 | 31.71  | 33.06  | -1.35 |
| 1,2-Dimethylenecyclohexane                  | 121.90 | 36.22  | 34.87  | 1.35  |
| Ethyl 3-methyl-2-butenate                   | 132.10 | 36.32  | 37.67  | -1.35 |
| Brassicic acid                              | 384.10 | 105.44 | 106.79 | -1.35 |
| 3-Isopropyl-2-methylheptane                 | 192.00 | 52.75  | 54.10  | -1.35 |
| Bromocyclopentane                           | 102.80 | 30.98  | 29.63  | 1.35  |
| 2-Chloroethyl vinyl ether                   | 96.80  | 26.64  | 27.99  | -1.35 |
| Chloroethane                                | 59.10  | 16.30  | 17.65  | -1.35 |
| 2-Ethyl-2-methyl-5-propyltetrahydrofuran    | 175.00 | 48.09  | 49.44  | -1.35 |
| Tropine                                     | 143.90 | 39.56  | 40.91  | -1.35 |
| 4-Methyltetradecane                         | 260.20 | 71.46  | 72.80  | -1.34 |
| Isoprene                                    | 82.80  | 25.49  | 24.15  | 1.34  |
| 2-Chloroethyl crotonate                     | 132.30 | 36.38  | 37.72  | -1.34 |
| 2-Propyl-5-butylpyrrolidine                 | 195.70 | 53.77  | 55.11  | -1.34 |
| Cyclohexyl thiocyanate                      | 136.80 | 40.30  | 38.96  | 1.34  |
| 2-Butoxy-4-methyl-1,3,2-dioxaphospholane    | 165.40 | 45.46  | 46.80  | -1.34 |
| Dichloro diethylamino phosphorus oxide      | 143.00 | 42.00  | 40.66  | 1.34  |
| 4-Methyl-3-penten-2-ol                      | 113.70 | 31.28  | 32.62  | -1.34 |
| 1,1-Dipropylhydrazine                       | 135.50 | 37.26  | 38.60  | -1.34 |
| 1-Ethoxycyclohexene                         | 137.10 | 37.70  | 39.04  | -1.34 |
| 4-Isopropylheptane                          | 176.40 | 48.48  | 49.82  | -1.34 |
| 1-Bromo-1-chloropropane                     | 93.90  | 28.53  | 27.19  | 1.34  |
| 3,3-Dimethylcyclohexanone                   | 135.20 | 37.18  | 38.52  | -1.34 |
| Fluoro-2,4,6-trimethylbenzene               | 137.00 | 40.35  | 39.01  | 1.34  |
| 1-Chlorobutane                              | 92.50  | 25.47  | 26.81  | -1.34 |
| Methyltrichlorosilane                       | 96.10  | 29.13  | 27.79  | 1.34  |
| Farnesol                                    | 252.80 | 72.11  | 70.77  | 1.34  |
| Trimethyl 2,2-diethylhydrazinosilane        | 175.80 | 50.99  | 49.65  | 1.34  |
| Tripropylborane                             | 176.60 | 48.54  | 49.87  | -1.33 |
| 2,2,3-Trimethylhexane                       | 159.50 | 43.85  | 45.18  | -1.33 |
| 6-Methyltridecane                           | 243.50 | 66.89  | 68.22  | -1.33 |
| 2-Methyltridecane                           | 243.90 | 67.00  | 68.33  | -1.33 |
| 4-Isopropylpyridine                         | 127.50 | 37.74  | 36.41  | 1.33  |

|                                     |        |       |       |       |
|-------------------------------------|--------|-------|-------|-------|
| 2,3-Dimethyldecane                  | 209.70 | 57.62 | 58.95 | -1.33 |
| Thiazolidine                        | 81.60  | 25.15 | 23.82 | 1.33  |
| 1-Decyne                            | 168.50 | 46.32 | 47.65 | -1.33 |
| Trimethylsilyloxytripropylsilane    | 269.00 | 76.55 | 75.22 | 1.33  |
| Benzyl formate                      | 128.50 | 38.01 | 36.68 | 1.33  |
| Benzyl alcohol                      | 108.60 | 32.55 | 31.22 | 1.33  |
| N-Nitropiperidine                   | 119.80 | 32.97 | 34.29 | -1.32 |
| 4,5-Diethyloctane                   | 208.90 | 57.41 | 58.73 | -1.32 |
| Fluorotributylsilane                | 242.80 | 66.71 | 68.03 | -1.32 |
| 1-Bromo-4-(trifluoromethyl)benzene  | 132.50 | 39.10 | 37.78 | 1.32  |
| 1-Methyl-4-isopropylcyclohexanol    | 173.60 | 47.73 | 49.05 | -1.32 |
| 2,4-Dimethyloctane                  | 177.10 | 48.69 | 50.01 | -1.32 |
| 1-Chloro-1,2-epoxycyclopentane      | 100.90 | 27.79 | 29.11 | -1.32 |
| cis-3-Hexenal                       | 107.90 | 29.71 | 31.03 | -1.32 |
| 2-Butyn-1-al                        | 71.00  | 19.59 | 20.91 | -1.32 |
| Cyclopentadecane                    | 240.80 | 68.80 | 67.48 | 1.32  |
| 2-Chloroallyl alcohol               | 78.90  | 21.76 | 23.08 | -1.32 |
| 1-Methyl-3-piperidinol              | 121.70 | 33.50 | 34.82 | -1.32 |
| 4-Fluorobenzonitrile                | 105.80 | 31.77 | 30.45 | 1.32  |
| Chloroacetone                       | 77.80  | 21.46 | 22.77 | -1.31 |
| alpha-Methyl-2-furanmethanol        | 108.20 | 29.80 | 31.11 | -1.31 |
| Cyclobutylamine                     | 81.00  | 22.34 | 23.65 | -1.31 |
| trans-1,2-Divinylcyclobutane        | 124.30 | 36.84 | 35.53 | 1.31  |
| Phenyl dimethoxyborine              | 148.40 | 43.45 | 42.14 | 1.31  |
| 5-Methyl-2-furanmethanol            | 108.40 | 29.86 | 31.17 | -1.31 |
| 2-Hexyne                            | 101.80 | 28.05 | 29.36 | -1.31 |
| 4-Morpholineethanamine              | 133.70 | 36.80 | 38.11 | -1.31 |
| Ethene                              | 39.60  | 10.99 | 12.30 | -1.31 |
| Hexadecyl vinyl ether               | 316.50 | 86.94 | 88.25 | -1.31 |
| 4-Pentenitrile                      | 90.60  | 24.98 | 26.29 | -1.31 |
| 5-Methyl-1-hexyne                   | 117.90 | 32.47 | 33.77 | -1.30 |
| Stearyl mercaptan                   | 330.50 | 93.39 | 92.09 | 1.30  |
| Methyl tert-pentyl sulfide          | 129.80 | 38.34 | 37.04 | 1.30  |
| 1-(Bromomethoxy)-2-methylbutane     | 139.10 | 40.89 | 39.59 | 1.30  |
| Eicosane                            | 345.50 | 94.90 | 96.20 | -1.30 |
| Dimethylcarbamic chloride           | 90.40  | 24.93 | 26.23 | -1.30 |
| 1-(2-Furyl)-3-ethyl-1-penten-3-ol   | 184.10 | 53.23 | 51.93 | 1.30  |
| Methylcyclopentane                  | 101.00 | 27.84 | 29.14 | -1.30 |
| 4-Propyldecane                      | 227.00 | 62.40 | 63.70 | -1.30 |
| 5-Methyltetradecane                 | 260.10 | 71.48 | 72.78 | -1.30 |
| Propenal                            | 58.70  | 16.24 | 17.54 | -1.30 |
| 4-Methylpyridine                    | 95.30  | 28.87 | 27.57 | 1.30  |
| 3-Pentanone ketazine                | 188.60 | 54.46 | 53.17 | 1.29  |
| 2,2-Diethyl-5-propyltetrahydrofuran | 191.40 | 52.64 | 53.93 | -1.29 |
| 3-Methyl-2-buten-1-ol               | 97.30  | 26.83 | 28.12 | -1.29 |
| N-t-Butylaminotriethylsilane        | 211.10 | 60.63 | 59.34 | 1.29  |
| Methyl bromoacetate                 | 91.50  | 25.24 | 26.53 | -1.29 |
| Hexanoyl chloride                   | 128.10 | 35.28 | 36.57 | -1.29 |
| Butoxytrimethylsilane               | 163.10 | 44.88 | 46.17 | -1.29 |



|                                                          |        |       |        |       |
|----------------------------------------------------------|--------|-------|--------|-------|
| 6-Methyldodecane                                         | 226.90 | 62.38 | 63.67  | -1.29 |
| beta-Methylbenzenepropanoic acid                         | 158.90 | 46.31 | 45.02  | 1.29  |
| 2-Methyl-1,3-cyclohexadiene                              | 105.20 | 31.58 | 30.29  | 1.29  |
| 2-Fluorobenzaldehyde                                     | 107.50 | 32.21 | 30.92  | 1.29  |
| Phenol                                                   | 92.30  | 28.04 | 26.75  | 1.29  |
| 2-Bromopropene                                           | 74.40  | 23.13 | 21.84  | 1.29  |
| Tetrabutylphosphonium formate                            | 340.60 | 93.57 | 94.86  | -1.29 |
| n-Propyl benzoate                                        | 162.20 | 47.21 | 45.92  | 1.29  |
| Diamyl terephthalate                                     | 305.30 | 86.46 | 85.17  | 1.29  |
| 7-Hexylpentadecane                                       | 360.50 | 99.03 | 100.32 | -1.29 |
| Phenyl hexoxy 2-(methoxycarbonyl)propyl phosphorus oxide | 315.40 | 89.23 | 87.94  | 1.29  |
| 2,2-Dichloroethylsulfonyl fluoride                       | 109.70 | 30.24 | 31.52  | -1.28 |
| 7-Methyltetradecane                                      | 260.20 | 71.52 | 72.80  | -1.28 |
| 1-Bromo-2-methylpentane                                  | 129.10 | 38.13 | 36.85  | 1.28  |
| 5-Methyltridecane                                        | 243.50 | 66.94 | 68.22  | -1.28 |
| Heneicosane                                              | 362.20 | 99.50 | 100.78 | -1.28 |
| 4-Propylundecane                                         | 243.60 | 66.97 | 68.25  | -1.28 |
| Cyclohexane                                              | 100.50 | 27.72 | 29.00  | -1.28 |
| 1-Ethyltetrahydrothiophenium dicyanamide                 | 184.90 | 50.87 | 52.15  | -1.28 |
| 1-Nonen-3-ol                                             | 164.70 | 45.33 | 46.61  | -1.28 |
| cis-Verbenol                                             | 156.50 | 45.64 | 44.36  | 1.28  |
| Tetradecane                                              | 244.90 | 67.33 | 68.61  | -1.28 |
| 1-Chloropentane                                          | 109.20 | 30.11 | 31.39  | -1.28 |
| Butyldi(3-cyanopropyl)phosphine                          | 236.50 | 67.58 | 66.30  | 1.28  |
| 2,5-Dimethylpyrazine                                     | 107.00 | 32.06 | 30.78  | 1.28  |
| 2-Pentanone ketazine                                     | 189.30 | 54.63 | 53.36  | 1.27  |
| Ethyl diacetylacetate                                    | 157.70 | 43.42 | 44.69  | -1.27 |
| 6-Methylpentadecane                                      | 276.70 | 76.06 | 77.33  | -1.27 |
| Ethoxytrichlorosilane                                    | 120.70 | 35.81 | 34.54  | 1.27  |
| Dibutyl chloromaleate                                    | 241.40 | 66.38 | 67.65  | -1.27 |
| 2-Ethylbutyryl chloride                                  | 126.70 | 34.92 | 36.19  | -1.27 |
| 4-Methoxybenzeneacetonitrile                             | 143.20 | 41.98 | 40.71  | 1.27  |
| 2,4-Dimethyloxazole                                      | 94.50  | 26.09 | 27.36  | -1.27 |
| Silane                                                   | 39.30  | 10.95 | 12.21  | -1.26 |
| 1-Undecyne                                               | 185.20 | 50.97 | 52.23  | -1.26 |
| Isopropylcyclopentane                                    | 134.30 | 37.01 | 38.27  | -1.26 |
| 1-Bromo-3-(trifluoromethyl)benzene                       | 132.50 | 39.04 | 37.78  | 1.26  |
| Dibutyl terephthalate                                    | 272.10 | 77.33 | 76.07  | 1.26  |
| Ethyl 4-bromobutyrate                                    | 142.10 | 39.15 | 40.41  | -1.26 |
| 1-Chloro-2,3-epoxycyclopentane                           | 100.90 | 27.85 | 29.11  | -1.26 |
| N-Methylcyclohexylamine                                  | 128.90 | 35.53 | 36.79  | -1.26 |
| 1,3-Dimethyladamantane                                   | 178.20 | 51.57 | 50.31  | 1.26  |
| 3-Hexanone O-propyloxime                                 | 176.50 | 48.59 | 49.85  | -1.26 |
| Tetrachlorosilane                                        | 93.00  | 28.20 | 26.94  | 1.26  |
| Bis(3-chloropropyl) ether                                | 149.70 | 41.24 | 42.50  | -1.26 |
| 3-Methylpyridine                                         | 95.30  | 28.83 | 27.57  | 1.26  |
| 2-(Methoxymethyl)furan                                   | 108.90 | 30.05 | 31.31  | -1.26 |
| Methylphenylphosphinic chloride                          | 136.50 | 40.13 | 38.88  | 1.25  |

|                                               |        |       |       |       |
|-----------------------------------------------|--------|-------|-------|-------|
| 4-Vinylcyclohexene                            | 121.30 | 35.96 | 34.71 | 1.25  |
| Ethyl 3-bromopropionate                       | 125.30 | 34.55 | 35.80 | -1.25 |
| 3-Bromononane                                 | 179.60 | 51.95 | 50.70 | 1.25  |
| Thiane                                        | 102.60 | 30.83 | 29.58 | 1.25  |
| 2-(1-Hydroxyisobutyl)furan                    | 140.10 | 38.61 | 39.86 | -1.25 |
| Pivalone                                      | 158.40 | 43.63 | 44.88 | -1.25 |
| 1,1-Dibutylhydrazine                          | 168.90 | 46.51 | 47.76 | -1.25 |
| Allyltrimethylsilane                          | 132.90 | 39.14 | 37.89 | 1.25  |
| 4-Propyldodecane                              | 260.30 | 71.58 | 72.83 | -1.25 |
| Muscone                                       | 258.10 | 73.48 | 72.23 | 1.25  |
| cis-1-Bromopropene                            | 74.10  | 23.01 | 21.76 | 1.25  |
| Diethyl 2,2-diethylhydrazinosilane            | 192.30 | 55.43 | 54.18 | 1.25  |
| 2-Methylbutanoyl chloride                     | 110.80 | 30.58 | 31.83 | -1.25 |
| 2,3-Dimethylundecane                          | 226.30 | 62.26 | 63.51 | -1.25 |
| 2-Picoline                                    | 95.20  | 28.79 | 27.55 | 1.24  |
| 2,4,4-Trimethylcyclohexanone                  | 151.40 | 41.72 | 42.96 | -1.24 |
| Acetoxime O-propyl ether                      | 110.20 | 30.42 | 31.66 | -1.24 |
| (Diethylamino)trimethylsilane                 | 162.80 | 47.33 | 46.09 | 1.24  |
| 2,4-Dimethyldecane                            | 209.80 | 57.74 | 58.98 | -1.24 |
| Bis(butylamino)borane                         | 186.10 | 51.24 | 52.48 | -1.24 |
| 3-(Chloromethyl)pentane                       | 124.70 | 34.40 | 35.64 | -1.24 |
| 3-Hexanone O-ethyloxime                       | 159.70 | 44.00 | 45.24 | -1.24 |
| 1-Butene                                      | 72.60  | 20.11 | 21.35 | -1.24 |
| (Methylthio)acetic acid                       | 91.70  | 25.35 | 26.59 | -1.24 |
| Ethylcyclopentane                             | 117.40 | 32.40 | 33.64 | -1.24 |
| 3-Bromopropyne                                | 70.00  | 21.87 | 20.64 | 1.23  |
| Isobutyl chloride                             | 92.20  | 25.49 | 26.72 | -1.23 |
| Methyl benzoate                               | 128.70 | 37.97 | 36.74 | 1.23  |
| 7-Methyltridecane                             | 243.50 | 66.99 | 68.22 | -1.23 |
| 2-Hexoxy-4-methyl-1,3,2-dioxaphospholane      | 198.80 | 54.73 | 55.96 | -1.23 |
| 2-Propyl-3-ethyl-1,4-diox-2-ene               | 160.70 | 44.28 | 45.51 | -1.23 |
| Diethylmethylamine                            | 105.90 | 29.25 | 30.48 | -1.23 |
| 3-Isopropyl-2-methyloctane                    | 208.60 | 57.42 | 58.65 | -1.23 |
| 3-Tolunitrile                                 | 117.20 | 34.81 | 33.58 | 1.23  |
| 3-(2-Furyl)-4-oxa-6-hexyl acetate             | 209.50 | 57.67 | 58.90 | -1.23 |
| 2-Methylacrylonitrile                         | 73.40  | 20.34 | 21.57 | -1.23 |
| Patchouli alcohol                             | 232.20 | 66.35 | 65.12 | 1.23  |
| 1,3-Dichloro-2-propanol                       | 98.80  | 27.31 | 28.53 | -1.22 |
| 3-Ethylpyridine                               | 111.20 | 33.16 | 31.94 | 1.22  |
| Acetoxime O-ethyl ether                       | 93.80  | 25.94 | 27.16 | -1.22 |
| Nonadecane                                    | 328.30 | 90.26 | 91.48 | -1.22 |
| N-(3-Aminopropyl)-N-methyl-1,3-propanediamine | 163.10 | 44.95 | 46.17 | -1.22 |
| 4-Propyltridecane                             | 277.10 | 76.22 | 77.44 | -1.22 |
| 2-Propyl-4-ethylpyrrole                       | 150.70 | 43.99 | 42.77 | 1.22  |
| 3-Methoxyphenol                               | 118.00 | 35.02 | 33.80 | 1.22  |
| 1,1-Difluoro-2-iodoethylene                   | 74.00  | 22.95 | 21.73 | 1.22  |
| Cyclohexyl methacrylate                       | 173.00 | 47.67 | 48.89 | -1.22 |
| Dioctyl sulfide                               | 297.50 | 84.25 | 83.04 | 1.21  |

|                                              |        |        |        |       |
|----------------------------------------------|--------|--------|--------|-------|
| 5-Bromononane                                | 179.60 | 51.91  | 50.70  | 1.21  |
| Cyclohexyldichloroborane                     | 143.40 | 41.98  | 40.77  | 1.21  |
| 1-Bromo-2-ethoxyethane                       | 106.30 | 29.38  | 30.59  | -1.21 |
| 2-Ethyl-4-methylpyrrole                      | 117.70 | 34.93  | 33.72  | 1.21  |
| Phenylacetate                                | 126.60 | 37.37  | 36.16  | 1.21  |
| Tripentyl phosphite                          | 309.80 | 85.20  | 86.41  | -1.21 |
| 2-Octyne                                     | 135.20 | 37.31  | 38.52  | -1.21 |
| 3-Cyclohexylhexane                           | 198.60 | 54.70  | 55.91  | -1.21 |
| 1-Chlorohexane                               | 125.90 | 34.76  | 35.97  | -1.21 |
| Cyanoacetylene                               | 52.80  | 14.71  | 15.92  | -1.21 |
| 1-Hepten-3-yne                               | 112.50 | 33.50  | 32.29  | 1.21  |
| Diisopentylamine                             | 189.70 | 52.26  | 53.47  | -1.21 |
| n-Propylbromoacetate                         | 125.20 | 34.57  | 35.78  | -1.21 |
| Diheptyl sulfide                             | 264.10 | 75.08  | 73.87  | 1.21  |
| 2-Chlorohexane                               | 125.60 | 34.68  | 35.89  | -1.21 |
| Diisopentyl sulfide                          | 196.40 | 56.51  | 55.31  | 1.20  |
| trans-3,7-Dimethyl-2,6-octadien-1-ol formate | 192.90 | 55.55  | 54.35  | 1.20  |
| Pentyloxytrimethylsilane                     | 179.70 | 49.52  | 50.72  | -1.20 |
| 1-Dodecyne                                   | 201.90 | 55.61  | 56.81  | -1.20 |
| 1-Bromo-2-isopropylacetylene                 | 103.40 | 31.00  | 29.80  | 1.20  |
| Decahydro-2-naphthol                         | 165.00 | 45.49  | 46.69  | -1.20 |
| Z,E-Nepetalactone                            | 162.30 | 44.75  | 45.95  | -1.20 |
| 2-Propyl-4-ethyl-2,3-dihydrofuran            | 153.80 | 42.42  | 43.62  | -1.20 |
| N,N-Dimethyl-1,2-ethanediamine               | 101.70 | 28.13  | 29.33  | -1.20 |
| 1,1,1,3,5,7,7-Octamethyltetrasiloxane        | 272.80 | 77.46  | 76.26  | 1.20  |
| cis-1-Bromo-1-butene                         | 90.80  | 27.54  | 26.34  | 1.20  |
| 2-Propyl-4-ethylpyrrolidine                  | 162.40 | 44.78  | 45.98  | -1.20 |
| 2-Chloropropane                              | 75.70  | 21.00  | 22.20  | -1.20 |
| 4,4-Dimethyl-1-pentyne                       | 117.70 | 32.52  | 33.72  | -1.20 |
| 3-Carene                                     | 152.20 | 44.38  | 43.18  | 1.20  |
| Di-s-butylsulfide                            | 162.30 | 47.15  | 45.95  | 1.20  |
| 4-Methyl-1-pentyne                           | 101.40 | 28.05  | 29.25  | -1.20 |
| Dipropyl terephthalate                       | 238.90 | 68.16  | 66.96  | 1.20  |
| Butyl hydrocinnamate                         | 210.90 | 60.48  | 59.28  | 1.20  |
| 7-Methylpentadecane                          | 276.80 | 76.16  | 77.36  | -1.20 |
| 1-Octen-3-yne                                | 129.60 | 38.18  | 36.98  | 1.20  |
| 6-Methyltetradecane                          | 260.10 | 71.58  | 72.78  | -1.20 |
| 4-Heptanone O-ethyloxime                     | 176.50 | 48.65  | 49.85  | -1.20 |
| 1-Bromo-2-(trifluoromethyl)benzene           | 131.90 | 38.81  | 37.61  | 1.20  |
| 1,3-Dichloro-trans-2-butene                  | 100.40 | 30.17  | 28.97  | 1.20  |
| 1-Bromopentadecane                           | 280.40 | 79.54  | 78.34  | 1.20  |
| 2-Chlorobutane                               | 92.20  | 25.53  | 26.72  | -1.19 |
| 1-Ethynylcyclopentanol                       | 116.70 | 32.25  | 33.44  | -1.19 |
| 2,4-Dimethylundecane                         | 226.40 | 62.34  | 63.53  | -1.19 |
| alpha-Methylbenzenepropanol                  | 157.80 | 45.91  | 44.72  | 1.19  |
| 2-Propyl-4-methyl-2,3-dihydrofuran           | 137.40 | 37.93  | 39.12  | -1.19 |
| Docosane                                     | 378.90 | 104.17 | 105.36 | -1.19 |
| 1,4-Difluorobenzene                          | 93.20  | 25.81  | 27.00  | -1.19 |
| Isopropenyl methyl ketone                    | 90.50  | 25.07  | 26.26  | -1.19 |

|                                                         |        |        |        |       |
|---------------------------------------------------------|--------|--------|--------|-------|
| 8-Methylpentadecane                                     | 276.80 | 76.17  | 77.36  | -1.19 |
| trans-1-Bromo-1-butene                                  | 91.10  | 27.61  | 26.42  | 1.19  |
| 4-Isopropylcyclohexanone                                | 151.60 | 41.83  | 43.02  | -1.19 |
| 9-Heptylheptadecane                                     | 410.60 | 112.87 | 114.06 | -1.19 |
| Diethylhydrophosphine oxide                             | 107.30 | 29.68  | 30.87  | -1.19 |
| Diacetyethylamine                                       | 124.80 | 34.48  | 35.67  | -1.19 |
| Ethyl 2-methoxybenzoate                                 | 170.70 | 49.44  | 48.26  | 1.18  |
| Methyl 2-hydroxy-3-methylbenzoate                       | 152.00 | 44.31  | 43.13  | 1.18  |
| 2,4,6-Trimethyloctane                                   | 192.20 | 52.97  | 54.15  | -1.18 |
| 2-Butoxypyridine                                        | 154.70 | 45.05  | 43.87  | 1.18  |
| 3-Isopropyl-2-methylnonane                              | 225.30 | 62.05  | 63.23  | -1.18 |
| Trinitromethane                                         | 98.20  | 27.19  | 28.37  | -1.18 |
| 2,4,6,8,10,12-Hexamethylcyclhexasiloxane                | 303.50 | 85.86  | 84.68  | 1.18  |
| Dibutyl butylamino thiophosphate                        | 278.60 | 79.03  | 77.85  | 1.18  |
| 1-Bromo-2-chloroethane                                  | 77.50  | 23.87  | 22.69  | 1.18  |
| Mercaptoacetic acid                                     | 74.60  | 20.72  | 21.90  | -1.18 |
| 2-Pentyne                                               | 85.10  | 23.60  | 24.78  | -1.18 |
| 2-Methyl-5-propylthiophane sulfone                      | 164.90 | 45.49  | 46.67  | -1.18 |
| 1-Bromooctadecane                                       | 330.50 | 93.26  | 92.09  | 1.17  |
| DINP                                                    | 440.50 | 123.43 | 122.26 | 1.17  |
| 4-Propylpyridine                                        | 128.20 | 37.77  | 36.60  | 1.17  |
| Isopentyl chloride                                      | 108.70 | 30.08  | 31.25  | -1.17 |
| 2,3-Dimethyldodecane                                    | 242.90 | 66.89  | 68.06  | -1.17 |
| 2,4-Dimethylsulfolane                                   | 132.50 | 36.61  | 37.78  | -1.17 |
| Pentylcyclopentane                                      | 167.90 | 46.32  | 47.49  | -1.17 |
| 1-Butyl-3-(2-cyanoethyl)imidazolium<br>thiocyanate      | 235.00 | 67.06  | 65.89  | 1.17  |
| 1-Bromo-1-chloroethane                                  | 77.40  | 23.83  | 22.67  | 1.16  |
| Triheptyl phosphite                                     | 409.90 | 112.70 | 113.86 | -1.16 |
| 3-Methyltetradecane                                     | 260.20 | 71.64  | 72.80  | -1.16 |
| Methacrolein                                            | 75.10  | 20.87  | 22.03  | -1.16 |
| Ethyl 2-bromo-2-methylpropanoate                        | 141.60 | 39.11  | 40.27  | -1.16 |
| 1,1-Dipentylhydrazine                                   | 202.30 | 55.76  | 56.92  | -1.16 |
| 3-Chloro-2-(chloromethyl)-1-propene                     | 99.50  | 29.89  | 28.73  | 1.16  |
| Trimethylethylenediamine                                | 118.70 | 32.83  | 33.99  | -1.16 |
| 2-Bromo-2-methylbutane                                  | 112.30 | 33.40  | 32.24  | 1.16  |
| Bromotrinitromethane                                    | 116.40 | 32.20  | 33.36  | -1.16 |
| 2-Methyl-5-ethylpyrrole                                 | 117.70 | 34.88  | 33.72  | 1.16  |
| Dimethyldi(2-octyloxy)silane                            | 350.60 | 96.44  | 97.60  | -1.16 |
| 4-Methylpentadecane                                     | 276.80 | 76.20  | 77.36  | -1.16 |
| 1,3-Benzodioxole                                        | 108.20 | 32.27  | 31.11  | 1.16  |
| 2-Methyltetradecane                                     | 260.50 | 71.73  | 72.89  | -1.16 |
| 2,2-Dichloro-4,4-dimethylpentane                        | 153.30 | 44.64  | 43.48  | 1.16  |
| 3,3,4,4-Tetramethylhexane                               | 173.40 | 47.84  | 49.00  | -1.16 |
| Cytosine                                                | 93.70  | 25.98  | 27.14  | -1.16 |
| N,N-Dibutylaminotriethylsilane                          | 277.30 | 78.65  | 77.49  | 1.16  |
| cis-1-Ethyl-2-methylcyclopentane                        | 133.40 | 36.87  | 38.03  | -1.16 |
| 1-(2-Cyanoethyl)-3-octylimidazolium 3-<br>sulfobenzoate | 397.40 | 111.59 | 110.44 | 1.15  |

|                                             |        |        |        |       |
|---------------------------------------------|--------|--------|--------|-------|
| Acetylhexane                                | 135.40 | 37.42  | 38.57  | -1.15 |
| 2-Ethylthiovinyl dihexoxy phosphorus oxide  | 337.50 | 95.16  | 94.01  | 1.15  |
| 3,4-Diethylhexane                           | 174.30 | 48.09  | 49.24  | -1.15 |
| 2-Ethyl-1,3-butadiene                       | 99.10  | 29.77  | 28.62  | 1.15  |
| cis-1-Ethyl-3-methylcyclopentane            | 133.10 | 36.79  | 37.94  | -1.15 |
| 1-Bromo-2-fluoroethane                      | 68.20  | 18.99  | 20.14  | -1.15 |
| Tributylsilane                              | 236.70 | 67.51  | 66.36  | 1.15  |
| Veratrole                                   | 134.80 | 39.56  | 38.41  | 1.15  |
| 1-Methyl-4-piperidone                       | 114.90 | 31.80  | 32.95  | -1.15 |
| 2-Heptenal                                  | 125.40 | 34.68  | 35.83  | -1.15 |
| 2-Fluoro-1-phenylethanone                   | 123.50 | 36.46  | 35.31  | 1.15  |
| Thiolactic acid                             | 91.20  | 25.30  | 26.45  | -1.15 |
| N-Nitrosopyrrolidine                        | 95.90  | 26.59  | 27.74  | -1.15 |
| Ethyl 3-aminobenzoate                       | 156.90 | 45.62  | 44.47  | 1.15  |
| 2-Cyclopenten-1-one                         | 82.30  | 22.86  | 24.01  | -1.15 |
| 1,3-Difluorobenzene                         | 93.20  | 25.85  | 27.00  | -1.15 |
| 3-Chloropentane                             | 108.80 | 30.13  | 31.28  | -1.15 |
| 2-Chloropentane                             | 108.90 | 30.16  | 31.31  | -1.15 |
| 4-Heptanone O-propyloxime                   | 193.30 | 53.31  | 54.45  | -1.14 |
| 2,2,5,5-Tetramethylhexane                   | 177.00 | 48.84  | 49.98  | -1.14 |
| N-(2-Hydroxypropyl)-2-furfurylamine         | 152.90 | 42.23  | 43.37  | -1.14 |
| 1-Chloro-4-nitro-2-(trifluoromethyl)benzene | 151.20 | 44.05  | 42.91  | 1.14  |
| Tricosane                                   | 395.60 | 108.80 | 109.94 | -1.14 |
| 2,4-Diethylpyrrolidine                      | 145.60 | 40.23  | 41.37  | -1.14 |
| Dihexyl terephthalate                       | 338.50 | 95.42  | 94.28  | 1.14  |
| 1-Butyl-3-methylimidazolium glycine         | 211.80 | 58.39  | 59.53  | -1.14 |
| Ethanethioic acid S-(1-methylheptyl) ester  | 198.50 | 57.02  | 55.88  | 1.14  |
| Ethyl hydrocinnamate                        | 177.50 | 51.26  | 50.12  | 1.14  |
| 1-Chloroheptane                             | 142.60 | 39.41  | 40.55  | -1.14 |
| Propylcyclopentane                          | 134.10 | 37.08  | 38.22  | -1.14 |
| 2,4-Dimethyldodecane                        | 243.00 | 66.95  | 68.09  | -1.14 |
| 2-Propyl-4-methylpyrrolidine                | 145.80 | 40.29  | 41.43  | -1.14 |
| Methoxytripropylsilane                      | 212.70 | 58.64  | 59.78  | -1.14 |
| Dibutylidinonylsilane                       | 470.20 | 131.54 | 130.40 | 1.14  |
| 3-Thiopropionic acid                        | 91.40  | 25.37  | 26.51  | -1.14 |
| 1-Oxa-4-thiaspiro[4,5]decane                | 151.20 | 44.04  | 42.91  | 1.13  |
| 3-Isopropyl-2-methyldecane                  | 242.00 | 66.68  | 67.81  | -1.13 |
| N-Ethylmorpholine                           | 121.90 | 33.74  | 34.87  | -1.13 |
| Sulfotep                                    | 267.40 | 75.91  | 74.78  | 1.13  |
| 1-Hexen-3-yne                               | 95.90  | 28.87  | 27.74  | 1.13  |
| 5-Methylpentadecane                         | 276.70 | 76.20  | 77.33  | -1.13 |
| 2-Methylpentadecane                         | 277.10 | 76.31  | 77.44  | -1.13 |
| 2-(Benzylamino)ethanol                      | 153.80 | 44.75  | 43.62  | 1.13  |
| O-Ethyl chlorofluorothiophosphate           | 111.00 | 33.01  | 31.88  | 1.13  |
| 3-Methylbutanoyl chloride                   | 110.70 | 30.67  | 31.80  | -1.13 |
| 1-Nitropropylene                            | 79.30  | 22.06  | 23.19  | -1.13 |
| 1-Bromoheptadecane                          | 313.80 | 88.63  | 87.51  | 1.12  |
| (3-Chloropropyl)trimethylsilane             | 152.80 | 44.47  | 43.35  | 1.12  |
| 1-Bromo-3-fluoropropane                     | 84.90  | 23.60  | 24.72  | -1.12 |

|                                             |        |       |       |       |
|---------------------------------------------|--------|-------|-------|-------|
| Methyl 2-hydroxy-5-methylbenzoate           | 152.30 | 44.33 | 43.21 | 1.12  |
| 3-Isopropyl-2-methylundecane                | 258.80 | 71.30 | 72.42 | -1.12 |
| 1-(2-Furyl)-2-methyl-3-propanol             | 140.20 | 38.77 | 39.89 | -1.12 |
| 1-Acetyl-3-methylpiperidine                 | 148.00 | 40.91 | 42.03 | -1.12 |
| 2-Heptyl bromide                            | 146.40 | 42.71 | 41.59 | 1.12  |
| 1-Allylcyclohexanol                         | 153.10 | 42.31 | 43.43 | -1.12 |
| 3-Hexyne                                    | 101.80 | 28.24 | 29.36 | -1.12 |
| Hexyloxytrimethylsilane                     | 196.30 | 54.16 | 55.28 | -1.12 |
| Ethyl benzoate                              | 145.50 | 42.46 | 41.34 | 1.12  |
| 1,1-Dimethylpropargylamine                  | 96.60  | 26.82 | 27.93 | -1.11 |
| 2-Methyl-5-propylpyrrole                    | 134.30 | 39.38 | 38.27 | 1.11  |
| 3-Methylpentadecane                         | 276.80 | 76.25 | 77.36 | -1.11 |
| 1,5-Hexadiyne                               | 91.70  | 25.48 | 26.59 | -1.11 |
| Butyl phenylacetate                         | 194.50 | 55.89 | 54.78 | 1.11  |
| Ethyl 3-cyclohexene-1-carboxylate           | 157.10 | 43.42 | 44.53 | -1.11 |
| 4-Bromocrotonic acid ethylester             | 136.50 | 39.98 | 38.88 | 1.10  |
| Furan                                       | 65.00  | 18.16 | 19.26 | -1.10 |
| N,N'-Diisopropylcarbodiimide                | 138.80 | 40.61 | 39.51 | 1.10  |
| Diallyl maleate                             | 184.40 | 50.91 | 52.01 | -1.10 |
| Chloroethyldimethylsilane                   | 118.90 | 35.15 | 34.05 | 1.10  |
| Hexylcyclopentane                           | 184.60 | 50.97 | 52.07 | -1.10 |
| 1-Chloro-2-(methylthio)ethane               | 94.60  | 28.48 | 27.38 | 1.10  |
| 1-Methoxycyclohexene                        | 120.50 | 33.39 | 34.49 | -1.10 |
| Ethyl 2,2-diethylhydrazinosilane            | 160.60 | 46.58 | 45.49 | 1.09  |
| L-Menthone                                  | 167.70 | 46.34 | 47.43 | -1.09 |
| 3-(Aminomethyl)-3,5,5-trimethylcyclohexanol | 185.20 | 51.14 | 52.23 | -1.09 |
| Oxacyclohexadecan-2-one                     | 255.20 | 70.34 | 71.43 | -1.09 |
| Cyclohexylamine                             | 112.90 | 31.31 | 32.40 | -1.09 |
| N-(1,1-Dimethylpropyl)aminotriethylsilane   | 227.00 | 64.79 | 63.70 | 1.09  |
| 4-Propylheptane                             | 175.60 | 48.51 | 49.60 | -1.09 |
| Pentyl salicylate                           | 202.80 | 58.15 | 57.06 | 1.09  |
| 5-Methyl-3-hexen-2-one                      | 124.70 | 34.55 | 35.64 | -1.09 |
| 3-Octyne                                    | 135.20 | 37.43 | 38.52 | -1.09 |
| Cyclodecanol                                | 171.00 | 47.25 | 48.34 | -1.09 |
| Ethyl phenyl fluorophosphate                | 166.40 | 45.99 | 47.08 | -1.09 |
| 2-Propyl-4-isopropylpyrrolidine             | 178.10 | 49.20 | 50.29 | -1.09 |
| 2,4,4-Trimethylhexane                       | 158.70 | 43.88 | 44.96 | -1.08 |
| 1-Bromo-3-chloropropane                     | 94.10  | 28.33 | 27.25 | 1.08  |
| 2-Vinyltetrahydrofuran                      | 104.30 | 28.96 | 30.04 | -1.08 |
| Methyl propenyl ketone                      | 91.50  | 25.45 | 26.53 | -1.08 |
| cis-1,2-Dimethylcyclopentane                | 117.20 | 32.50 | 33.58 | -1.08 |
| 2-Bromobutanoic acid                        | 107.50 | 29.84 | 30.92 | -1.08 |
| 2-Undecyne                                  | 185.30 | 51.18 | 52.26 | -1.08 |
| Triethyl 2,2-dimethylhydrazinosilane        | 193.10 | 55.48 | 54.40 | 1.08  |
| 1-Chlorooctane                              | 159.30 | 44.05 | 45.13 | -1.08 |
| Methyl 2-furoate                            | 110.70 | 30.72 | 31.80 | -1.08 |
| 2-Methylpentane                             | 111.50 | 30.94 | 32.02 | -1.08 |
| Trimethylvinylsilane                        | 116.80 | 34.55 | 33.47 | 1.08  |

|                                        |        |       |       |       |
|----------------------------------------|--------|-------|-------|-------|
| 1-bromo-9-chloro-5-nonanone            | 195.70 | 56.19 | 55.11 | 1.08  |
| 3-Isopropyl-2-methyldodecane           | 275.70 | 75.98 | 77.06 | -1.08 |
| 3-Methyl-5-hepten-2-one                | 140.40 | 38.87 | 39.95 | -1.08 |
| Dioctylamine                           | 290.90 | 80.15 | 81.22 | -1.07 |
| Allylthiourea                          | 108.90 | 32.38 | 31.31 | 1.07  |
| Isopentyloxytrimethylsilane            | 179.30 | 49.54 | 50.61 | -1.07 |
| Rhodinol                               | 179.70 | 49.65 | 50.72 | -1.07 |
| O,O-Dipropyl propylphosphorus thioxide | 218.10 | 62.33 | 61.26 | 1.07  |
| 2-Bromopropanoic acid                  | 91.10  | 25.35 | 26.42 | -1.07 |
| Propyl phenylacetate                   | 177.60 | 51.22 | 50.15 | 1.07  |
| Butylcyclopentane                      | 150.70 | 41.70 | 42.77 | -1.07 |
| Ethylcyclohexane                       | 133.60 | 37.01 | 38.08 | -1.07 |
| 1-Pentene                              | 89.30  | 24.86 | 25.93 | -1.07 |
| Chloro(chloromethyl)dimethylsilane     | 116.40 | 34.43 | 33.36 | 1.07  |
| 2,2,4,4-Tetramethylpentane             | 158.60 | 43.87 | 44.94 | -1.07 |
| 1-Bromohexadecane                      | 297.10 | 83.99 | 82.93 | 1.06  |
| 3-Methylhexadecane                     | 293.40 | 80.85 | 81.91 | -1.06 |
| 1,8-Cineole                            | 164.40 | 45.47 | 46.53 | -1.06 |
| 3-Methoxybenzenemethanol               | 133.90 | 39.22 | 38.16 | 1.06  |
| 2-Propene-1-thiol                      | 74.40  | 22.90 | 21.84 | 1.06  |
| 2-(Methylthio)ethanol                  | 89.40  | 24.90 | 25.96 | -1.06 |
| Dimethyl carbate                       | 187.40 | 51.78 | 52.84 | -1.06 |
| Piperidine                             | 96.10  | 26.74 | 27.79 | -1.05 |
| 8-Propylpentadecane                    | 310.40 | 85.52 | 86.57 | -1.05 |
| 3-Chloro-2,5-furandione                | 90.70  | 25.26 | 26.31 | -1.05 |
| 2,3-Dimethyltridecane                  | 259.50 | 71.56 | 72.61 | -1.05 |
| Citronellene                           | 164.40 | 47.58 | 46.53 | 1.05  |
| N,N-Dimethylacrylamide                 | 104.00 | 28.91 | 29.96 | -1.05 |
| 1,3-Cyclohexadiene                     | 88.90  | 26.87 | 25.82 | 1.05  |
| 2,4-Dimethyltridecane                  | 259.60 | 71.59 | 72.64 | -1.05 |
| Isobutyldimethylamine                  | 122.00 | 33.85 | 34.90 | -1.05 |
| 1,1,2-Trimethylcyclopentane            | 133.70 | 37.06 | 38.11 | -1.05 |
| (Fluoromethyl)benzene                  | 104.30 | 31.09 | 30.04 | 1.05  |
| Acetic acid 2-bromoethylester          | 108.10 | 30.04 | 31.09 | -1.05 |
| 2,4-Dimethylpyrrole                    | 102.30 | 30.54 | 29.49 | 1.05  |
| 1,4-Dichloro-2-butyne                  | 96.80  | 29.03 | 27.99 | 1.04  |
| 3,6-Dihydro-4-methyl-2H-pyran          | 103.90 | 28.89 | 29.93 | -1.04 |
| t-Butylmercaptan                       | 96.40  | 28.92 | 27.88 | 1.04  |
| Sulfuryl chloride isocyanate           | 83.30  | 23.24 | 24.28 | -1.04 |
| Benzyl acetate                         | 144.20 | 42.03 | 40.99 | 1.04  |
| 4-Ethyloctane                          | 175.50 | 48.53 | 49.57 | -1.04 |
| 4-Methylhexadecane                     | 293.40 | 80.87 | 81.91 | -1.04 |
| 2,2-Dimethylpropane                    | 94.70  | 26.37 | 27.41 | -1.04 |
| 2-Propyl-5-hexylpyrrolidine            | 228.90 | 63.18 | 64.22 | -1.04 |
| 1-Chloro-2,2-dimethylpropane           | 108.40 | 30.13 | 31.17 | -1.04 |
| Chlorodiethylsilane                    | 118.30 | 34.92 | 33.88 | 1.04  |
| Methylcyclobutane                      | 85.90  | 23.96 | 25.00 | -1.04 |
| 5-Methyl-2-hexyne                      | 118.20 | 32.82 | 33.86 | -1.04 |
| 2,5-Diethylpyrrole                     | 134.20 | 39.28 | 38.24 | 1.04  |

|                                                            |        |        |        |       |
|------------------------------------------------------------|--------|--------|--------|-------|
| (Z) 9-Octadecen-1-ol                                       | 314.70 | 86.72  | 87.75  | -1.03 |
| Hexaethyldisiloxane                                        | 267.80 | 75.92  | 74.89  | 1.03  |
| Heptyloxytrimethylsilane                                   | 212.90 | 58.80  | 59.83  | -1.03 |
| trans-1-Ethyl-3-methylcyclopentane                         | 134.00 | 37.16  | 38.19  | -1.03 |
| 1,1-Dimethylcyclopentane                                   | 117.70 | 32.69  | 33.72  | -1.03 |
| 1,1-Dichoro-2-fluoroethene                                 | 73.00  | 20.43  | 21.46  | -1.03 |
| Tetraisopropylsilane                                       | 235.00 | 66.92  | 65.89  | 1.03  |
| Methylcyclohexane                                          | 117.00 | 32.50  | 33.53  | -1.03 |
| Octamethyltrisiloxane                                      | 236.90 | 67.44  | 66.41  | 1.03  |
| trans-1,2-Dimethylcyclopentane                             | 117.80 | 32.72  | 33.75  | -1.03 |
| Propyl hydrocinnamate                                      | 194.50 | 55.81  | 54.78  | 1.03  |
| Jasmone                                                    | 177.00 | 51.01  | 49.98  | 1.03  |
| Triethylamine                                              | 121.70 | 33.79  | 34.82  | -1.03 |
| 1-Pentadecyne                                              | 252.00 | 69.53  | 70.56  | -1.03 |
| 1-Ethyl-1-methylcyclopentane                               | 133.80 | 37.11  | 38.13  | -1.02 |
| Trioctyl phosphite                                         | 460.10 | 126.61 | 127.63 | -1.02 |
| 1-Phenyl-2-butyl-3,5-dimethylpyrazolium<br>methylsulfonate | 299.90 | 82.67  | 83.69  | -1.02 |
| 2-Bromo-2-methylpropane                                    | 96.40  | 28.90  | 27.88  | 1.02  |
| Pyridine                                                   | 78.80  | 24.07  | 23.05  | 1.02  |
| Anise alcohol                                              | 134.00 | 39.21  | 38.19  | 1.02  |
| 1-(2-Furyl)-3-methyl-3-pentanol                            | 172.90 | 47.84  | 48.86  | -1.02 |
| cis-9-Octadecenitrile                                      | 307.10 | 84.65  | 85.67  | -1.02 |
| 2-Heptyne                                                  | 118.50 | 32.92  | 33.94  | -1.02 |
| Halon 1011                                                 | 60.80  | 19.13  | 18.11  | 1.02  |
| (-)-Carveol                                                | 161.50 | 46.75  | 45.73  | 1.02  |
| 2-Butoxyphenol                                             | 168.10 | 48.56  | 47.54  | 1.02  |
| Dihexyl sulfide                                            | 230.70 | 65.73  | 64.71  | 1.02  |
| Thiolane                                                   | 86.40  | 26.15  | 25.13  | 1.02  |
| 1-Dimethylamino-2-propyne                                  | 96.80  | 26.97  | 27.99  | -1.02 |
| Diamyl isophthalate                                        | 305.30 | 86.19  | 85.17  | 1.02  |
| Diethyl 2,2-dimethylhydrazinosilane                        | 160.20 | 46.39  | 45.38  | 1.01  |
| Pentacosane                                                | 429.00 | 118.09 | 119.10 | -1.01 |
| 4-Ethyl-2-propylthiophane sulfone                          | 181.30 | 50.15  | 51.16  | -1.01 |
| 4-Octyne                                                   | 135.20 | 37.51  | 38.52  | -1.01 |
| 2-Bromooctane                                              | 163.10 | 47.18  | 46.17  | 1.01  |
| Diisopropylhydrophosphine oxide                            | 139.90 | 38.80  | 39.81  | -1.01 |
| 2-Methylpiperidine                                         | 112.70 | 31.34  | 32.35  | -1.01 |
| 3-Bromo-3-methylpentane                                    | 128.40 | 37.66  | 36.65  | 1.01  |
| Dichlorodimethylsilane                                     | 99.20  | 29.65  | 28.64  | 1.01  |
| 1-Bromo-2-butoxyethylene                                   | 133.00 | 38.92  | 37.92  | 1.00  |
| 2-Methyl-4-isopropylpyrrolidine                            | 145.10 | 40.23  | 41.23  | -1.00 |
| 3,4-Dihydroxytoluene                                       | 117.40 | 34.64  | 33.64  | 1.00  |
| Trimethyl 2,2-dimethylhydrazinosilane                      | 143.40 | 41.77  | 40.77  | 1.00  |
| 1,2,3-Triazole                                             | 59.30  | 16.70  | 17.70  | -1.00 |
| Methyl 3-methoxybenzoate                                   | 154.60 | 44.84  | 43.84  | 1.00  |
| Dipropoxy butyl phosphorus                                 | 217.60 | 60.12  | 61.12  | -1.00 |
| 1-Chloro-2,3-epoxycyclohexane                              | 116.60 | 32.42  | 33.42  | -1.00 |
| Isophytol                                                  | 344.10 | 94.82  | 95.82  | -1.00 |



|                                                        |        |        |        |       |
|--------------------------------------------------------|--------|--------|--------|-------|
| 4-Isopropyl-2-propylthiophane sulfone                  | 197.50 | 54.61  | 55.61  | -1.00 |
| 2-Chloroheptane                                        | 142.30 | 39.47  | 40.47  | -1.00 |
| 2-Methylheptadecane                                    | 310.30 | 85.55  | 86.55  | -1.00 |
| 1,1,1,2-Tetrachloroacetone                             | 119.80 | 35.29  | 34.29  | 1.00  |
| trans-1,3-Dichloropropene                              | 84.40  | 25.58  | 24.59  | 0.99  |
| Ethylbenzene sulfonate                                 | 157.50 | 45.63  | 44.64  | 0.99  |
| 2-Methylhexadecane                                     | 293.70 | 81.00  | 81.99  | -0.99 |
| 3-Pyridinepropanol                                     | 136.80 | 39.95  | 38.96  | 0.99  |
| 2,2-Dimethyl-4-(2-butylthioethoxymethyl)-1,3-dioxolane | 245.90 | 67.89  | 68.88  | -0.99 |
| 4-Chloroheptane                                        | 142.10 | 39.42  | 40.41  | -0.99 |
| Methyl 5-bromovalerate                                 | 142.10 | 39.42  | 40.41  | -0.99 |
| 5-Methylhexadecane                                     | 293.40 | 80.92  | 81.91  | -0.99 |
| 1-Hexene                                               | 106.00 | 29.52  | 30.51  | -0.99 |
| Methyl phenylacetate                                   | 144.70 | 42.11  | 41.12  | 0.99  |
| cis-1,2-Dimethylcyclohexane                            | 132.70 | 36.85  | 37.83  | -0.98 |
| Azomethane                                             | 63.30  | 19.78  | 18.80  | 0.98  |
| Iodopentafluorobenzene                                 | 132.50 | 38.76  | 37.78  | 0.98  |
| 1,1,2,2-Tetrachloro-1,2-difluoroethane                 | 111.00 | 30.90  | 31.88  | -0.98 |
| Propylcyclohexane                                      | 150.30 | 41.68  | 42.66  | -0.98 |
| 4-Methyl-2-pentyne                                     | 101.70 | 28.35  | 29.33  | -0.98 |
| 3-(4-Methyl-3-pentenyl)furan                           | 160.80 | 46.52  | 45.54  | 0.98  |
| Methyl hydrocinnamate                                  | 160.80 | 46.52  | 45.54  | 0.98  |
| Propylene                                              | 55.90  | 15.79  | 16.77  | -0.98 |
| Thietane                                               | 70.50  | 21.75  | 20.77  | 0.98  |
| 3-Methylpiperidine                                     | 112.70 | 31.37  | 32.35  | -0.98 |
| 1,1-Dichlorocyclohexane                                | 128.40 | 37.63  | 36.65  | 0.98  |
| 1,4-Dioxatetralin                                      | 124.90 | 36.67  | 35.69  | 0.98  |
| 1,1,2,2-Tetrachloro-1-fluoroethane                     | 106.20 | 31.54  | 30.56  | 0.98  |
| 2-Phenoxy-1-propanol                                   | 150.90 | 43.80  | 42.83  | 0.97  |
| 1-Tetradecene                                          | 239.60 | 66.18  | 67.15  | -0.97 |
| Propylbenzenesulfonate                                 | 174.20 | 50.19  | 49.22  | 0.97  |
| Isopropylsulfinyl chloride                             | 99.90  | 29.81  | 28.84  | 0.97  |
| 2,3-Dimethyltetradecane                                | 276.20 | 76.22  | 77.19  | -0.97 |
| 2,4-Dimethyltetradecane                                | 276.20 | 76.22  | 77.19  | -0.97 |
| Cuscohygrine                                           | 231.30 | 65.85  | 64.88  | 0.97  |
| 3-Methylfuran                                          | 82.60  | 23.12  | 24.09  | -0.97 |
| 3-Chloroheptane                                        | 142.10 | 39.44  | 40.41  | -0.97 |
| Ethylisobutylsilanol                                   | 145.60 | 40.40  | 41.37  | -0.97 |
| 2,3,4,5,6-Pentamethylheptane                           | 205.60 | 56.86  | 57.83  | -0.97 |
| 3-(Trifluoromethyl)phenyl isocyanate                   | 139.50 | 38.73  | 39.70  | -0.97 |
| 5,6-Dibutyldecane                                      | 308.70 | 85.14  | 86.11  | -0.97 |
| 2-Methyl-2-cyclopenten-1-one                           | 99.10  | 27.65  | 28.62  | -0.97 |
| 2,4,6-Tris(butoxy)-1,3,5-triethylborazine              | 400.90 | 110.43 | 111.40 | -0.97 |
| Allyl vinyl ether                                      | 93.70  | 26.17  | 27.14  | -0.97 |
| ((4-tert-Butylphenoxy)methyl)oxirane                   | 210.00 | 60.00  | 59.04  | 0.96  |
| Norcarane                                              | 110.10 | 30.67  | 31.63  | -0.96 |
| Phosphorus oxytrichloride                              | 82.40  | 25.00  | 24.04  | 0.96  |
| Di-s-butylamine                                        | 155.30 | 43.07  | 44.03  | -0.96 |

|                                                                                |        |        |        |       |
|--------------------------------------------------------------------------------|--------|--------|--------|-------|
| 1,2-Dibromo-1,1,2-trifluoroethane                                              | 96.20  | 26.86  | 27.82  | -0.96 |
| trans-1,3-Dimethylcyclopentane                                                 | 117.60 | 32.73  | 33.69  | -0.96 |
| 2-Methyl-3-hexyne                                                              | 118.40 | 32.95  | 33.91  | -0.96 |
| Dipropylisobutylaminoborane                                                    | 202.40 | 55.99  | 56.95  | -0.96 |
| 2-Fluoropyridine                                                               | 83.80  | 23.46  | 24.42  | -0.96 |
| 3-Vinyl-7-oxabicyclo[4.1.0]heptane                                             | 130.10 | 36.16  | 37.12  | -0.96 |
| 4-Methoxy-alpha-methylbenzenemethanol                                          | 150.30 | 43.62  | 42.66  | 0.96  |
| Diethyl decoxy phosphorus                                                      | 275.90 | 78.07  | 77.11  | 0.96  |
| Cyclooctyne                                                                    | 121.50 | 35.72  | 34.76  | 0.96  |
| Chlorodimethylsilane                                                           | 85.70  | 25.90  | 24.94  | 0.96  |
| Methyldichloro-2-butoxyethylsilane                                             | 192.20 | 55.11  | 54.15  | 0.96  |
| 2,3-Dimethylpentadecane                                                        | 292.80 | 80.79  | 81.75  | -0.96 |
| 1-Hexadecyne                                                                   | 268.70 | 74.18  | 75.14  | -0.96 |
| 1-Bromotetradecane                                                             | 263.70 | 74.72  | 73.76  | 0.96  |
| Heptacosane                                                                    | 462.40 | 127.31 | 128.26 | -0.95 |
| Phenyl ethoxy 2-(methoxycarbonyl)ethyl phosphorus oxide                        | 231.00 | 65.75  | 64.80  | 0.95  |
| alpha-Methylbenzeneacetic acid                                                 | 143.50 | 41.75  | 40.80  | 0.95  |
| Octyloxytrimethylsilane                                                        | 229.50 | 63.43  | 64.38  | -0.95 |
| 1-Bromotridecane                                                               | 246.90 | 70.11  | 69.16  | 0.95  |
| Methyl 4-bromo-2-butenate                                                      | 119.70 | 35.22  | 34.27  | 0.95  |
| (Diethylamino fluoro oxophosphorus)<br>(bis(diethylamino) oxophosphorus) oxide | 303.10 | 83.62  | 84.57  | -0.95 |
| 3-Chlorohexane                                                                 | 125.40 | 34.88  | 35.83  | -0.95 |
| 1-Heptene                                                                      | 122.70 | 34.14  | 35.09  | -0.95 |
| 5-Decyne                                                                       | 168.60 | 46.73  | 47.68  | -0.95 |
| t-Butylacetylene                                                               | 101.40 | 28.30  | 29.25  | -0.95 |
| Diethyl isobutoxy phosphorus                                                   | 175.50 | 50.52  | 49.57  | 0.95  |
| beta-Cyclocitral                                                               | 160.70 | 46.46  | 45.51  | 0.95  |
| 3-Methyl-1,2-butadiene                                                         | 83.70  | 25.34  | 24.39  | 0.95  |
| 2-Methoxy-p-cresol                                                             | 134.20 | 39.19  | 38.24  | 0.95  |
| (Chloromethyl)trimethylsilane                                                  | 119.40 | 35.13  | 34.19  | 0.94  |
| 5-Methylheptadecane                                                            | 310.00 | 85.52  | 86.46  | -0.94 |
| Tridecylmercaptan                                                              | 246.10 | 69.88  | 68.94  | 0.94  |
| Ascaridole                                                                     | 169.70 | 47.04  | 47.98  | -0.94 |
| Diethyl butylamino thiophosphate                                               | 211.80 | 60.47  | 59.53  | 0.94  |
| Ethyl 4-pyridinecarboxylate                                                    | 137.90 | 40.20  | 39.26  | 0.94  |
| 1-Chlorodecane                                                                 | 192.70 | 53.35  | 54.29  | -0.94 |
| 1-Phenoxy-2-propanone                                                          | 144.70 | 42.06  | 41.12  | 0.94  |
| N-Nitrosopiperidine                                                            | 112.00 | 31.22  | 32.16  | -0.94 |
| Dichlorodiethylsilane                                                          | 132.50 | 38.71  | 37.78  | 0.93  |
| 4-Methyl-cis-2-pentene                                                         | 104.40 | 29.14  | 30.07  | -0.93 |
| Thujone                                                                        | 161.60 | 44.83  | 45.76  | -0.93 |
| 2-Butanone ketazine                                                            | 156.50 | 45.29  | 44.36  | 0.93  |
| cis-1,3-Dimethylcyclopentane                                                   | 117.70 | 32.79  | 33.72  | -0.93 |
| Bis(2-methyl) carbonate                                                        | 170.60 | 47.30  | 48.23  | -0.93 |
| 3-Methyl-2-cyclopenten-1-one                                                   | 99.10  | 27.69  | 28.62  | -0.93 |
| 4-Methyloctadecane                                                             | 326.60 | 90.09  | 91.02  | -0.93 |
| 2-Chlorooctane                                                                 | 159.00 | 44.12  | 45.05  | -0.93 |

|                                                          |        |        |        |       |
|----------------------------------------------------------|--------|--------|--------|-------|
| 2-Chloro-1-trifluoromethylbenzene                        | 127.90 | 35.59  | 36.52  | -0.93 |
| 2,4-Dimethyl-3-isopropylpentane                          | 173.80 | 48.18  | 49.11  | -0.93 |
| 1-(2-Cyanoethyl)-3-(2-hydroxyethyl)-imidazolium chloride | 184.30 | 51.06  | 51.99  | -0.93 |
| Tetrabutylphosphonium propanoate                         | 370.60 | 102.16 | 103.09 | -0.93 |
| Allylamine                                               | 67.70  | 19.08  | 20.00  | -0.92 |
| 2-Ethylpyridine                                          | 111.60 | 32.97  | 32.05  | 0.92  |
| 3-Methylheptadecane                                      | 310.00 | 85.54  | 86.46  | -0.92 |
| 4-Methylheptadecane                                      | 310.00 | 85.54  | 86.46  | -0.92 |
| 2,4-Dimethylpentadecane                                  | 292.90 | 80.85  | 81.77  | -0.92 |
| Ethanesulfonylchloride                                   | 91.50  | 25.61  | 26.53  | -0.92 |
| Triisobutylborane                                        | 225.30 | 62.31  | 63.23  | -0.92 |
| 4-Bromo-2-methylhexane                                   | 145.70 | 42.32  | 41.40  | 0.92  |
| 1-Bromo-2-ethoxyethylene                                 | 99.80  | 29.73  | 28.81  | 0.92  |
| 3-Bromo-4,5-dihydro-2(3H)-furanone                       | 97.40  | 27.23  | 28.15  | -0.92 |
| Nonylcyclopentane                                        | 234.70 | 64.89  | 65.81  | -0.92 |
| 2-Pyridinepropanol                                       | 137.10 | 39.96  | 39.04  | 0.92  |
| 2,5-Dihydro-1H-pyrrole                                   | 74.90  | 21.06  | 21.98  | -0.92 |
| n-Dodecylmercaptan                                       | 230.40 | 65.55  | 64.63  | 0.92  |
| 1-Bromo-4-methylpentane                                  | 129.60 | 37.90  | 36.98  | 0.92  |
| 1,4-Pentadien-3-ol                                       | 92.10  | 25.78  | 26.70  | -0.92 |
| 2,4-Hexanedione                                          | 115.10 | 32.09  | 33.01  | -0.92 |
| Allylchlorodimethylsilane                                | 129.90 | 37.98  | 37.07  | 0.91  |
| 1,3-Dichloroacetone                                      | 91.80  | 25.70  | 26.61  | -0.91 |
| 2-Chloro-2-methylpropane                                 | 92.20  | 25.81  | 26.72  | -0.91 |
| 1,2-Cyclohexanedione                                     | 105.50 | 29.46  | 30.37  | -0.91 |
| 2-Ethyl-4-isopropylpyrrolidine                           | 161.50 | 44.82  | 45.73  | -0.91 |
| Dipropoxythiophosphonate                                 | 167.90 | 48.40  | 47.49  | 0.91  |
| 2-Chloro-4-methylpentane                                 | 125.00 | 34.81  | 35.72  | -0.91 |
| O-Ethyl 2-methylpropanoic imino ester                    | 126.20 | 35.14  | 36.05  | -0.91 |
| Methyl 2-methoxybenzoate                                 | 154.20 | 44.64  | 43.73  | 0.91  |
| N-Isopropylaminotriethylsilane                           | 195.80 | 56.05  | 55.14  | 0.91  |
| Diamylsilane                                             | 205.10 | 58.60  | 57.69  | 0.91  |
| 4-Hexen-3-one                                            | 108.00 | 30.15  | 31.06  | -0.91 |
| S-t-Butyl thiolacetate                                   | 130.80 | 38.22  | 37.31  | 0.91  |
| Cycloheptane                                             | 115.40 | 32.18  | 33.09  | -0.91 |
| Tri-n-pentylamine                                        | 272.60 | 75.30  | 76.21  | -0.91 |
| Isopropyltrimethylsilane                                 | 138.30 | 38.47  | 39.37  | -0.90 |
| Dibutyl-nonylsilane                                      | 320.20 | 90.16  | 89.26  | 0.90  |
| 1-Piperidinepropanenitrile                               | 146.90 | 40.83  | 41.73  | -0.90 |
| Isopropyl benzoate                                       | 161.50 | 46.63  | 45.73  | 0.90  |
| Cyclohexanemethanamine                                   | 128.70 | 35.84  | 36.74  | -0.90 |
| trans-1,2-Dimethylcyclohexane                            | 133.40 | 37.13  | 38.03  | -0.90 |
| Trichloroacetaldehyde diethylacetal                      | 172.30 | 47.80  | 48.69  | -0.89 |
| Nonyloxytrimethylsilane                                  | 246.20 | 68.07  | 68.96  | -0.89 |
| 1-Ethyladamantane                                        | 177.70 | 51.07  | 50.18  | 0.89  |
| 1-Bromo-6-fluorohexane                                   | 135.00 | 37.57  | 38.46  | -0.89 |
| Trimethylsilyloxytriethylsilane                          | 219.20 | 62.45  | 61.56  | 0.89  |
| Caprylene                                                | 139.40 | 38.78  | 39.67  | -0.89 |

|                                           |        |        |        |       |
|-------------------------------------------|--------|--------|--------|-------|
| Cyclononanone                             | 148.00 | 41.14  | 42.03  | -0.89 |
| Octamethylcyclotetrasiloxane              | 263.80 | 74.68  | 73.79  | 0.89  |
| 4-Methyl-1-pentene                        | 105.70 | 29.54  | 30.43  | -0.89 |
| 5-Methyloctadecane                        | 326.60 | 90.13  | 91.02  | -0.89 |
| Bicyclopophosphite                        | 120.50 | 33.60  | 34.49  | -0.89 |
| trans-Crotononitrile                      | 73.50  | 20.71  | 21.60  | -0.89 |
| beta-Citronellol                          | 179.30 | 49.73  | 50.61  | -0.88 |
| 2-Chloro-2-methylbutane                   | 108.20 | 30.23  | 31.11  | -0.88 |
| alpha-Terpineol acetate                   | 204.30 | 56.59  | 57.47  | -0.88 |
| 10,11-Dipropyleicosane                    | 442.70 | 121.98 | 122.86 | -0.88 |
| 3-Trifluoromethylaniline                  | 125.50 | 34.98  | 35.86  | -0.88 |
| n-Undecylmercaptan                        | 213.60 | 60.90  | 60.02  | 0.88  |
| O,O-Diethyl butylphosphorus thioxide      | 202.30 | 57.80  | 56.92  | 0.88  |
| 1-Penten-4-yne                            | 79.30  | 22.31  | 23.19  | -0.88 |
| 5-Butyldocosane                           | 444.10 | 122.37 | 123.25 | -0.88 |
| Cyclohexanecarboxaldehyde                 | 119.50 | 33.34  | 34.21  | -0.87 |
| Methanesulfonylchloride                   | 74.80  | 21.08  | 21.95  | -0.87 |
| Diethyloctylsilane                        | 236.70 | 67.23  | 66.36  | 0.87  |
| 5-Methoxy-1-phenyl-1-pentanol             | 200.50 | 57.30  | 56.43  | 0.87  |
| N,N,N',N'-Tetramethyl-1,6-hexanediamine   | 201.70 | 55.89  | 56.76  | -0.87 |
| Ethyl bis(2-chloropropoxy)silane          | 215.70 | 59.73  | 60.60  | -0.87 |
| Ethyl trans-2-methyl-2-butenolate         | 130.20 | 36.28  | 37.15  | -0.87 |
| cis-1-Methyl-2-propylcyclopentane         | 150.10 | 41.74  | 42.61  | -0.87 |
| 1,1-Dimethylcyclohexane                   | 133.00 | 37.05  | 37.92  | -0.87 |
| trans-1-Ethyl-2-methylcyclopentane        | 133.80 | 37.27  | 38.13  | -0.86 |
| O,O-diethyl ethylthiophosphinate          | 168.00 | 48.38  | 47.52  | 0.86  |
| O,O-Diethyl propylphosphorus thioxide     | 184.70 | 52.96  | 52.10  | 0.86  |
| Isopropylcyclohexane                      | 149.40 | 41.55  | 42.41  | -0.86 |
| O,O-Dipropyl butylphosphorus thioxide     | 235.60 | 66.92  | 66.06  | 0.86  |
| Dibutylsilane                             | 171.70 | 49.39  | 48.53  | 0.86  |
| Isopentene                                | 88.50  | 24.85  | 25.71  | -0.86 |
| 2-Methyloctadecane                        | 326.90 | 90.24  | 91.10  | -0.86 |
| 4,4-Dimethyl-2-pentyne                    | 118.20 | 33.00  | 33.86  | -0.86 |
| 1-Cyclohexene-1-carboxaldehyde            | 113.60 | 33.45  | 32.59  | 0.86  |
| cis-2-Heptene                             | 122.10 | 34.07  | 34.93  | -0.86 |
| 3-Methyl-1-pentene                        | 105.40 | 29.49  | 30.35  | -0.86 |
| 2-Fluoro-1,1,2-trichloroethane            | 92.20  | 25.87  | 26.72  | -0.85 |
| Benzyl butanoate                          | 178.10 | 51.14  | 50.29  | 0.85  |
| Tributylamine                             | 222.50 | 61.61  | 62.46  | -0.85 |
| 4-Fluoroacetophenone                      | 123.60 | 36.19  | 35.34  | 0.85  |
| 1-(2-Furyl)-2-ethyl-3-propanol            | 156.50 | 43.51  | 44.36  | -0.85 |
| Bis(diethyl)disiloxane                    | 205.10 | 58.54  | 57.69  | 0.85  |
| Ethyl phenylacetate                       | 161.50 | 46.58  | 45.73  | 0.85  |
| 2,4-Dimethylhexadecane                    | 309.50 | 85.48  | 86.33  | -0.85 |
| 1-Ethyltetrahydrothiophenium saccharinate | 260.60 | 73.76  | 72.91  | 0.85  |
| Pyrazine                                  | 74.30  | 22.66  | 21.81  | 0.85  |
| 3-Chloropropanoyl chloride                | 92.20  | 25.88  | 26.72  | -0.84 |
| Triisopropylsilane                        | 187.00 | 53.57  | 52.73  | 0.84  |
| 2-Methylnonadecane                        | 343.50 | 94.81  | 95.65  | -0.84 |

|                                                          |        |       |       |       |
|----------------------------------------------------------|--------|-------|-------|-------|
| Perhydrofluorene                                         | 194.30 | 55.57 | 54.73 | 0.84  |
| 2-Acetoxyanisole                                         | 152.30 | 44.05 | 43.21 | 0.84  |
| 2,2-Dichlorobutane                                       | 106.00 | 29.67 | 30.51 | -0.84 |
| 2,3-Dimethylhexadecane                                   | 309.40 | 85.46 | 86.30 | -0.84 |
| 3-Heptyne                                                | 118.50 | 33.10 | 33.94 | -0.84 |
| Guanine                                                  | 116.80 | 34.31 | 33.47 | 0.84  |
| 2-Methyl-1-pentene                                       | 105.30 | 29.48 | 30.32 | -0.84 |
| Ethyl 2-bromobutyrate                                    | 141.10 | 39.30 | 40.14 | -0.84 |
| 3-Methyloctadecane                                       | 326.60 | 90.18 | 91.02 | -0.84 |
| 1-Bromododecane                                          | 230.30 | 65.44 | 64.60 | 0.84  |
| 2,4,6-Trimethylnonane                                    | 208.00 | 57.65 | 58.49 | -0.84 |
| 3-Fluorophenol                                           | 97.20  | 27.26 | 28.10 | -0.84 |
| cis-1,3-Dimethylcyclohexane                              | 133.80 | 37.30 | 38.13 | -0.83 |
| 2,2,6,6-Tetramethyl-4-piperidinamine                     | 172.30 | 47.86 | 48.69 | -0.83 |
| 1-(2-Furanyl)-2-propanone                                | 119.10 | 33.27 | 34.10 | -0.83 |
| Tripropylamine                                           | 172.00 | 47.78 | 48.61 | -0.83 |
| 1H-Pyrazole                                              | 64.30  | 18.24 | 19.07 | -0.83 |
| 4-Fluoronitrobenzene                                     | 111.50 | 32.85 | 32.02 | 0.83  |
| 2-Methoxyphenol                                          | 118.10 | 34.66 | 33.83 | 0.83  |
| 2-Bromododecanoic acid                                   | 240.10 | 66.46 | 67.29 | -0.83 |
| Acetylacetone (enol form)                                | 98.60  | 27.65 | 28.48 | -0.83 |
| 3-(Chloromethyl)heptane                                  | 158.10 | 43.97 | 44.80 | -0.83 |
| 1a,2b,4a-1,2,4-Trimethylcyclopentane                     | 134.40 | 37.47 | 38.30 | -0.83 |
| Benzyl 3-methylbutanoate                                 | 194.20 | 55.53 | 54.70 | 0.83  |
| Diisobutylboronic anhydride                              | 311.60 | 87.73 | 86.90 | 0.83  |
| 2,3-Dimethylhexane                                       | 144.20 | 40.16 | 40.99 | -0.83 |
| Exaltol                                                  | 249.70 | 70.75 | 69.92 | 0.83  |
| 2-Chlorocyclohexanone                                    | 116.70 | 32.62 | 33.44 | -0.82 |
| Pentylcyclohexane                                        | 183.60 | 50.97 | 51.79 | -0.82 |
| 4-Heptyl bromide                                         | 146.20 | 42.36 | 41.54 | 0.82  |
| Benzylcarbinol isobutyrate                               | 194.40 | 55.58 | 54.76 | 0.82  |
| 2,3-Pentadiene                                           | 83.80  | 25.24 | 24.42 | 0.82  |
| 1-Phenoxy-2-propanol                                     | 151.40 | 43.78 | 42.96 | 0.82  |
| 1-Bromoundecane                                          | 213.60 | 60.84 | 60.02 | 0.82  |
| Dibutyl phthalate                                        | 272.70 | 77.05 | 76.23 | 0.82  |
| Dichloro isobutoxyborine                                 | 131.00 | 36.55 | 37.37 | -0.82 |
| 1,4-Dimethyl-2-propylpyrrolidine                         | 162.50 | 45.19 | 46.01 | -0.82 |
| 1,1-Dichloro-1-nitroethane                               | 96.40  | 27.06 | 27.88 | -0.82 |
| Benzyl laurate                                           | 311.50 | 87.69 | 86.88 | 0.81  |
| cis-2-Pentene                                            | 88.70  | 24.95 | 25.76 | -0.81 |
| 2-(Chloromethyl)furan                                    | 96.80  | 28.80 | 27.99 | 0.81  |
| Carvenone                                                | 161.70 | 46.60 | 45.79 | 0.81  |
| 2-(Benzyloxy)ethanol                                     | 151.20 | 43.72 | 42.91 | 0.81  |
| Phenethyl propionate                                     | 177.60 | 50.96 | 50.15 | 0.81  |
| 1,8-Nonadiyne                                            | 141.80 | 39.52 | 40.33 | -0.81 |
| 1,2-Difluorobenzene                                      | 93.20  | 26.19 | 27.00 | -0.81 |
| Phenyl ethoxy 2-(methoxycarbonyl)propyl phosphorus oxide | 249.00 | 70.54 | 69.73 | 0.81  |
| Decyloxytrimethylsilane                                  | 262.80 | 72.71 | 73.52 | -0.81 |

|                                                         |        |        |        |       |
|---------------------------------------------------------|--------|--------|--------|-------|
| 1,2-Dimethyl-5-propylpyrrolidine                        | 161.80 | 45.01  | 45.81  | -0.80 |
| (Chloromethyl)cyclopropane                              | 85.60  | 24.11  | 24.91  | -0.80 |
| 1-(Bromomethoxy)-3-methylbutane                         | 139.20 | 40.42  | 39.62  | 0.80  |
| Propylcyclohexylketone                                  | 168.50 | 46.85  | 47.65  | -0.80 |
| Hexylcyclohexane                                        | 200.40 | 55.60  | 56.40  | -0.80 |
| d-Verbenone                                             | 153.10 | 44.23  | 43.43  | 0.80  |
| 3-Ethyl-2,4-dimethyl-1H-pyrrole                         | 135.60 | 39.43  | 38.63  | 0.80  |
| 1-Chlorododecane                                        | 226.10 | 62.65  | 63.45  | -0.80 |
| Diethyl heptoxy phosphorus                              | 225.80 | 64.17  | 63.37  | 0.80  |
| Dipentyl sulfide                                        | 197.40 | 56.38  | 55.58  | 0.80  |
| 4-Methylnonadecane                                      | 343.20 | 94.77  | 95.57  | -0.80 |
| Tris(2-chloroethyl) phosphite                           | 202.00 | 57.64  | 56.84  | 0.80  |
| 4-Propyldocosane                                        | 427.30 | 117.84 | 118.64 | -0.80 |
| 1-Cyclopropylcyclohexene                                | 136.60 | 39.70  | 38.90  | 0.80  |
| 1,2,5-Trimethylpyrrole                                  | 119.40 | 34.98  | 34.19  | 0.79  |
| 3-Methoxyphenylacetone                                  | 161.00 | 46.39  | 45.60  | 0.79  |
| Methylthiirane                                          | 72.30  | 22.06  | 21.27  | 0.79  |
| cis-2,2-Dimethyl-3-hexene                               | 134.90 | 39.23  | 38.44  | 0.79  |
| Heptylcyclopentane                                      | 200.40 | 55.61  | 56.40  | -0.79 |
| 2-(Acetyloxy)-1-phenylethanone                          | 164.00 | 47.21  | 46.42  | 0.79  |
| Cyclopentene                                            | 79.50  | 22.45  | 23.24  | -0.79 |
| 5-Methylnonadecane                                      | 343.20 | 94.78  | 95.57  | -0.79 |
| Butylphenylboronic acid                                 | 174.40 | 50.06  | 49.27  | 0.79  |
| 2-Propylpiperidine                                      | 145.70 | 40.61  | 41.40  | -0.79 |
| Bromochlorofluoromethane                                | 65.60  | 18.64  | 19.43  | -0.79 |
| Tris(2-hydroxyethyl)phosphine                           | 160.50 | 44.67  | 45.46  | -0.79 |
| Diethyl isopropoxy phosphorus                           | 158.80 | 45.78  | 44.99  | 0.79  |
| S-sec-Butyl thioacetate                                 | 131.50 | 38.29  | 37.50  | 0.79  |
| Sorbic alcohol                                          | 108.90 | 32.09  | 31.31  | 0.78  |
| 1-(2-Furyl)-3-methyl-1-penten-3-ol                      | 168.00 | 48.30  | 47.52  | 0.78  |
| Phenyl ethoxy 2-(ethoxycarbonyl)propyl phosphorus oxide | 265.20 | 74.96  | 74.18  | 0.78  |
| 1,2,2-Trichloropropane                                  | 103.80 | 30.69  | 29.91  | 0.78  |
| trans-1-Ethyl-4-methylcyclohexane                       | 150.20 | 41.85  | 42.63  | -0.78 |
| 2,3-Dimethylheptadecane                                 | 326.00 | 90.07  | 90.85  | -0.78 |
| Uracil                                                  | 90.40  | 25.45  | 26.23  | -0.78 |
| Pelletierine                                            | 146.40 | 40.81  | 41.59  | -0.78 |
| 1-Chloro-3-methyl-2-butene                              | 102.10 | 30.22  | 29.44  | 0.78  |
| 1a,2a,4b-1,2,4-Trimethylcyclopentane                    | 133.60 | 37.30  | 38.08  | -0.78 |
| 2,4,6-Trimethyldecane                                   | 224.60 | 62.26  | 63.04  | -0.78 |
| n-Nonylmercaptan                                        | 180.20 | 51.64  | 50.86  | 0.78  |
| Homocamfin                                              | 162.70 | 46.84  | 46.06  | 0.78  |
| 1-Methyl-4-vinylcyclohexene                             | 138.20 | 40.12  | 39.34  | 0.78  |
| 1,6-Heptadiyne                                          | 108.40 | 30.39  | 31.17  | -0.78 |
| 2-Chlorocyclopentanone                                  | 100.30 | 28.17  | 28.95  | -0.78 |
| Dibromodifluoromethane                                  | 74.70  | 22.70  | 21.92  | 0.78  |
| 1-Methyl-2-ethyl-5-propylpyrrolidine                    | 178.20 | 49.54  | 50.31  | -0.77 |
| Tri(1,3-dichloro-2-propoxy)borine                       | 287.70 | 81.12  | 80.35  | 0.77  |
| 3,3-Dimethyl-1-butene                                   | 105.50 | 29.60  | 30.37  | -0.77 |

|                                                |        |        |        |       |
|------------------------------------------------|--------|--------|--------|-------|
| 3-Methylcyclohexyl acrylate                    | 172.00 | 47.84  | 48.61  | -0.77 |
| 3-Trifluoromethylbenzoyl chloride              | 147.30 | 42.61  | 41.84  | 0.77  |
| 3-Methylpyridazine                             | 90.90  | 27.14  | 26.37  | 0.77  |
| 1,2,3,4-Tetramethylcyclohexane                 | 165.80 | 46.14  | 46.91  | -0.77 |
| 3-Chloro-3,4-epoxy-1-methylcyclohexane         | 133.20 | 37.20  | 37.97  | -0.77 |
| Triethyl 1-propoxyethoxysilane                 | 235.10 | 65.15  | 65.92  | -0.77 |
| 2,4-Dimethylheptadecane                        | 326.10 | 90.11  | 90.88  | -0.77 |
| Iodotrifluoromethane                           | 67.50  | 19.18  | 19.95  | -0.77 |
| Ethyl 2-cyano-2-phenylacetate                  | 178.30 | 51.11  | 50.34  | 0.77  |
| Methylchloroform                               | 87.30  | 26.15  | 25.38  | 0.77  |
| Ethyl 2-furancarboxylate                       | 127.40 | 35.61  | 36.38  | -0.77 |
| Dimethyl bis(2-chloropropoxy)silane            | 215.70 | 59.83  | 60.60  | -0.77 |
| 2-Bromopropanoyl chloride                      | 96.20  | 28.59  | 27.82  | 0.77  |
| Piperitone                                     | 162.30 | 46.72  | 45.95  | 0.77  |
| 3,3-Dimethylbutanoyl chloride                  | 126.00 | 35.23  | 36.00  | -0.77 |
| 1-Decene                                       | 172.80 | 48.07  | 48.83  | -0.76 |
| 1,1,1,3,5,5,5-Heptamethyltrisiloxane           | 222.30 | 63.17  | 62.41  | 0.76  |
| Trichloroacetonitrile                          | 88.50  | 26.47  | 25.71  | 0.76  |
| 3-Methylnonadecane                             | 343.20 | 94.81  | 95.57  | -0.76 |
| Dibutylsulfide                                 | 163.90 | 47.15  | 46.39  | 0.76  |
| 2-Methyl-1,5-hexadiene                         | 115.60 | 33.90  | 33.14  | 0.76  |
| Thiepane                                       | 118.70 | 34.75  | 33.99  | 0.76  |
| 2-Methylpyrazine                               | 90.70  | 27.07  | 26.31  | 0.76  |
| Nonacosane                                     | 495.80 | 136.67 | 137.43 | -0.76 |
| Diethyl phthalate                              | 204.20 | 58.20  | 57.44  | 0.76  |
| 1-Butoxycyclohexene                            | 170.40 | 47.42  | 48.17  | -0.75 |
| 4-Methylcyclohexyl acrylate                    | 172.00 | 47.86  | 48.61  | -0.75 |
| 3-Methyl-3-penten-1-yne                        | 94.80  | 28.19  | 27.44  | 0.75  |
| Heptanoyl chloride                             | 144.80 | 40.40  | 41.15  | -0.75 |
| 4-Trifluoromethylphenyltrimethylsilane         | 191.20 | 54.63  | 53.88  | 0.75  |
| Phenyl chlorofluorophosphate                   | 138.30 | 40.12  | 39.37  | 0.75  |
| 1-Piperidinamine                               | 108.30 | 30.39  | 31.14  | -0.75 |
| 2-Chloro-N,N-diallylacetamide                  | 161.20 | 46.40  | 45.65  | 0.75  |
| 1,1,3,3-Tetramethylguanidinium heptanoate      | 255.00 | 70.63  | 71.38  | -0.75 |
| Tris(2-chloroethyl) phosphate                  | 207.20 | 57.52  | 58.27  | -0.75 |
| 6,6-Dimethylbicyclo[3.1.1]hept-2-ene-2-ethanol | 173.10 | 49.66  | 48.91  | 0.75  |
| Isopulegol acetate                             | 202.60 | 57.75  | 57.01  | 0.74  |
| 1-(2-Furyl)-3-propanol                         | 124.10 | 34.73  | 35.47  | -0.74 |
| Isobutylcyclohexane                            | 166.50 | 46.36  | 47.10  | -0.74 |
| 2-(2-Pyridyl)ethanol                           | 120.50 | 35.23  | 34.49  | 0.74  |
| 3-Methyleicosane                               | 359.80 | 99.38  | 100.12 | -0.74 |
| Diisopropoxyphosphinylsulfenyl chloride        | 188.90 | 53.99  | 53.25  | 0.74  |
| Diethyl hexoxy phosphorus                      | 209.10 | 59.53  | 58.79  | 0.74  |
| Dichloroacetonitrile                           | 74.50  | 21.13  | 21.87  | -0.74 |
| 1-Penten-3-yne                                 | 79.50  | 23.98  | 23.24  | 0.74  |
| Diglycidyl resorcinol ether                    | 206.40 | 57.31  | 58.05  | -0.74 |
| 1-Chloro-4-(trifluoromethyl)benzene            | 128.30 | 35.89  | 36.63  | -0.74 |
| Divinyl ether                                  | 77.40  | 21.93  | 22.67  | -0.74 |

|                                                             |        |        |        |       |
|-------------------------------------------------------------|--------|--------|--------|-------|
| 1,1-Dichloro-2-fluoropropene                                | 88.70  | 25.03  | 25.76  | -0.73 |
| 3-Cyclohexene-1-carboxaldehyde                              | 114.00 | 31.97  | 32.70  | -0.73 |
| 2-Methyl-4-ethylpyrrolidine                                 | 129.20 | 36.14  | 36.87  | -0.73 |
| Diethoxy ethyl phosphorus                                   | 151.00 | 42.12  | 42.85  | -0.73 |
| iso-Butylsilane                                             | 105.30 | 31.05  | 30.32  | 0.73  |
| Phenyl isobutoxy 2-(methoxycarbonyl)propyl phosphorus oxide | 282.20 | 79.57  | 78.84  | 0.73  |
| Trichloromethy trimethoxysilane                             | 170.50 | 47.47  | 48.20  | -0.73 |
| Methyl bis(2-chloropropoxy)silane                           | 199.30 | 55.37  | 56.10  | -0.73 |
| 2-Methylcyclohexyl acrylate                                 | 172.10 | 47.91  | 48.64  | -0.73 |
| p-Menthane                                                  | 166.30 | 46.32  | 47.05  | -0.73 |
| Dihydropinene                                               | 155.30 | 44.76  | 44.03  | 0.73  |
| trans-2-Heptene                                             | 122.40 | 34.28  | 35.01  | -0.73 |
| 4-Propylheneicosane                                         | 410.60 | 113.33 | 114.06 | -0.73 |
| 8-Heptylpentadecane                                         | 377.20 | 104.17 | 104.90 | -0.73 |
| 1-Propanesulfonylchloride                                   | 108.10 | 30.36  | 31.09  | -0.73 |
| 1,1,3-Trimethylcyclopentane                                 | 134.20 | 37.52  | 38.24  | -0.72 |
| Cyclononane                                                 | 148.20 | 41.36  | 42.08  | -0.72 |
| 1-(2-Furyl)-2-isopropyl-3-aminopropane                      | 174.20 | 49.94  | 49.22  | 0.72  |
| 3,3-Dimethyl-1-pentene                                      | 121.40 | 34.01  | 34.73  | -0.72 |
| 2-Chloroacrylaldehyde                                       | 73.20  | 20.79  | 21.51  | -0.72 |
| 2,4,6-Trimethylundecane                                     | 241.20 | 66.87  | 67.59  | -0.72 |
| Octylcyclopentane                                           | 217.10 | 60.26  | 60.98  | -0.72 |
| Octadecane                                                  | 311.60 | 86.18  | 86.90  | -0.72 |
| 3-Methyl-1-butene                                           | 89.20  | 25.18  | 25.90  | -0.72 |
| Methoxydichloromethane                                      | 82.60  | 23.37  | 24.09  | -0.72 |
| 1-Butyl-3-(2-cyanoethyl)-imidazolium chloride               | 208.60 | 57.93  | 58.65  | -0.72 |
| 2,2-Dichloro-4,4-dimethylhexane                             | 169.40 | 48.62  | 47.90  | 0.72  |
| trans-1-Methyl-2-propylcyclopentane                         | 150.30 | 41.94  | 42.66  | -0.72 |
| Dimethylketazine                                            | 123.50 | 36.03  | 35.31  | 0.72  |
| 1,1-Dichloro-2-methylpropane                                | 106.00 | 29.79  | 30.51  | -0.72 |
| t-Butylcyclohexane                                          | 165.50 | 46.11  | 46.83  | -0.72 |
| Trifluoroacetophenone                                       | 132.90 | 37.17  | 37.89  | -0.72 |
| Methyl benzenesulfonate                                     | 140.90 | 40.80  | 40.08  | 0.72  |
| 1,5(H)-Diazabicyclo[4.3.0]non-5-enium pyrazolate            | 192.20 | 54.87  | 54.15  | 0.72  |
| Oxalylchloride                                              | 78.50  | 22.25  | 22.97  | -0.72 |
| trans-3-Penten-1-yne                                        | 79.00  | 23.82  | 23.10  | 0.72  |
| Divinyl sulfone                                             | 100.70 | 28.34  | 29.06  | -0.72 |
| 4-Methylheneicosane                                         | 376.50 | 103.99 | 104.70 | -0.71 |
| 4-Methyleicosane                                            | 359.80 | 99.41  | 100.12 | -0.71 |
| 3-Bromopentane                                              | 112.70 | 33.06  | 32.35  | 0.71  |
| 1-Undecene                                                  | 189.50 | 52.70  | 53.41  | -0.71 |
| 5-Methyleicosane                                            | 359.90 | 99.44  | 100.15 | -0.71 |
| Trichloroacetic acid                                        | 98.60  | 27.77  | 28.48  | -0.71 |
| 3-Bromo-2-methylnonane                                      | 195.40 | 55.74  | 55.03  | 0.71  |
| 1-Bromodecane                                               | 196.90 | 56.15  | 55.44  | 0.71  |
| Isopentyl bromide                                           | 112.90 | 33.11  | 32.40  | 0.71  |
| 1-Chloro-1,2-epoxycyclohexane                               | 116.60 | 32.71  | 33.42  | -0.71 |



|                                                         |        |        |        |       |
|---------------------------------------------------------|--------|--------|--------|-------|
| cis-2-Octene                                            | 138.80 | 38.80  | 39.51  | -0.71 |
| 1-(2-Cyanoethyl)-3-(2-propen-1-yl)-imidazolium chloride | 187.10 | 53.46  | 52.75  | 0.71  |
| Heptylcyclohexane                                       | 217.00 | 60.25  | 60.96  | -0.71 |
| 2,4-Dimethylpyrrolidine                                 | 112.80 | 31.67  | 32.37  | -0.70 |
| 2-Bromodecanoic acid                                    | 207.70 | 57.70  | 58.40  | -0.70 |
| 5-Ethyl-2-norbornene                                    | 134.90 | 39.14  | 38.44  | 0.70  |
| Bis(diethylamino) propylborane                          | 229.00 | 64.95  | 64.25  | 0.70  |
| Ethyl bis(N,N-diethylamino) phosphate                   | 230.70 | 64.01  | 64.71  | -0.70 |
| 2-Butylsilane                                           | 105.30 | 31.02  | 30.32  | 0.70  |
| 2,3,3-Trimethyl-1-butene                                | 121.10 | 33.95  | 34.65  | -0.70 |
| 3-Methylmethylenecyclohexane                            | 127.80 | 37.19  | 36.49  | 0.70  |
| Diethyl octoxy phosphorus                               | 242.50 | 68.65  | 67.95  | 0.70  |
| 4-(1,1-Dimethylpropyl)cyclohexanone                     | 182.60 | 50.82  | 51.52  | -0.70 |
| Butyl-di(3-acetoxypropyl)phosphine                      | 291.10 | 80.58  | 81.28  | -0.70 |
| Chloroethylene                                          | 53.90  | 15.52  | 16.22  | -0.70 |
| Chloroacetyl chloride                                   | 75.70  | 21.50  | 22.20  | -0.70 |
| 2-Methylfuran                                           | 82.70  | 23.42  | 24.12  | -0.70 |
| trans-2-Octene                                          | 139.10 | 38.89  | 39.59  | -0.70 |
| Ethyl isobutyl 2-chloropropoxysilane                    | 208.20 | 59.24  | 58.54  | 0.70  |
| cis-3-Penten-1-yne                                      | 78.70  | 23.72  | 23.02  | 0.70  |
| Bis(allylamino)borane                                   | 141.30 | 40.89  | 40.19  | 0.70  |
| 2-Furfurylamine                                         | 94.40  | 26.63  | 27.33  | -0.70 |
| Methyl trichloroacetate                                 | 115.80 | 32.50  | 33.20  | -0.70 |
| Hexylsilane                                             | 139.30 | 40.34  | 39.64  | 0.70  |
| Triethoxyphenylsilane                                   | 233.40 | 66.15  | 65.45  | 0.70  |
| 2-Chloroacrolein                                        | 73.10  | 20.79  | 21.49  | -0.70 |
| 2-Ethyl-4-methylpyrrolidine                             | 129.10 | 36.15  | 36.85  | -0.70 |
| 3-Decen-2-one                                           | 175.00 | 48.74  | 49.44  | -0.70 |
| Trichloromethane                                        | 70.70  | 21.52  | 20.83  | 0.69  |
| 2,4-Dimethyl-1-pentene                                  | 121.90 | 34.18  | 34.87  | -0.69 |
| Pentanedioyl dichloride                                 | 127.80 | 35.80  | 36.49  | -0.69 |
| 2-Bromoethanol                                          | 72.20  | 20.55  | 21.24  | -0.69 |
| 1-Bromononane                                           | 180.20 | 51.55  | 50.86  | 0.69  |
| N,N-Diethyl-1,3-propanediamine                          | 150.40 | 42.00  | 42.69  | -0.69 |
| 1-Butyl-3-methylimidazolium dicyanoamide                | 208.00 | 57.80  | 58.49  | -0.69 |
| 2-Cyclohexene-1-one                                     | 97.30  | 28.81  | 28.12  | 0.69  |
| Dihydro-2(3H)-thiophenone                               | 88.70  | 26.45  | 25.76  | 0.69  |
| Hexamethyldisiloxane                                    | 170.70 | 48.94  | 48.26  | 0.68  |
| 2,4,4-Trimethyl-2-pentene                               | 134.50 | 39.01  | 38.33  | 0.68  |
| Phosgene                                                | 59.60  | 17.10  | 17.78  | -0.68 |
| 2-Hexanethiol                                           | 129.80 | 37.72  | 37.04  | 0.68  |
| Thiolane 1-oxide                                        | 91.30  | 27.16  | 26.48  | 0.68  |
| Arecoline                                               | 152.20 | 42.50  | 43.18  | -0.68 |
| cis-1,3-Dichloropropene                                 | 84.20  | 25.21  | 24.53  | 0.68  |
| cis-Cyclohexyl-1,2-diamine                              | 123.90 | 34.74  | 35.42  | -0.68 |
| Isopropyl methyl sulfide                                | 96.60  | 28.61  | 27.93  | 0.68  |
| 1,7-Octadiyne                                           | 125.10 | 35.07  | 35.75  | -0.68 |
| 11-Butyldocosane                                        | 444.00 | 122.54 | 123.22 | -0.68 |

|                                                             |        |        |        |       |
|-------------------------------------------------------------|--------|--------|--------|-------|
| trans-3-Hexene                                              | 105.70 | 29.75  | 30.43  | -0.68 |
| Perhydrophenanthrene                                        | 211.20 | 60.04  | 59.36  | 0.68  |
| Ethylchlorosulfinate                                        | 91.40  | 27.18  | 26.51  | 0.67  |
| 2-Methoxypyridine                                           | 105.00 | 30.91  | 30.24  | 0.67  |
| 4-Fluorotoluene                                             | 104.60 | 30.80  | 30.13  | 0.67  |
| Decylcyclopentane                                           | 250.50 | 69.47  | 70.14  | -0.67 |
| 5-Methylheneicosane                                         | 376.50 | 104.03 | 104.70 | -0.67 |
| 2-Pentyloxytrimethylsilane                                  | 178.60 | 49.75  | 50.42  | -0.67 |
| Diethyl butoxy phosphorus                                   | 175.70 | 50.30  | 49.63  | 0.67  |
| 1-Chlorotetradecane                                         | 259.50 | 71.94  | 72.61  | -0.67 |
| Triethylsilanol                                             | 145.20 | 40.59  | 41.26  | -0.67 |
| 1-Octanethiol                                               | 163.60 | 46.98  | 46.31  | 0.67  |
| 1-Bromo-2,2-dimethylpropane                                 | 112.60 | 32.99  | 32.32  | 0.67  |
| 1-Phenyl-2-heptyl-3,5-dimethylpyrazolium<br>methylsulfonate | 348.20 | 97.61  | 96.94  | 0.67  |
| 2,2-Dichloropropane                                         | 89.80  | 25.40  | 26.07  | -0.67 |
| 1,3-Butanediolsulfite                                       | 107.70 | 30.31  | 30.98  | -0.67 |
| 5-Methyl-5-hexen-2-one                                      | 123.30 | 34.59  | 35.25  | -0.66 |
| 1,9-Dichlorononane                                          | 190.20 | 52.94  | 53.60  | -0.66 |
| 1-Dodecene                                                  | 206.20 | 57.33  | 57.99  | -0.66 |
| Methyl 3-mercaptopropanoate                                 | 108.60 | 30.56  | 31.22  | -0.66 |
| Diisobutylene                                               | 133.70 | 38.77  | 38.11  | 0.66  |
| 2,3-Dichloropropene                                         | 83.90  | 25.11  | 24.45  | 0.66  |
| Diethylnonylsilane                                          | 253.40 | 71.60  | 70.94  | 0.66  |
| Isobutyrylbromide                                           | 98.60  | 29.14  | 28.48  | 0.66  |
| 2-Chloro-N-(2-chloroethyl)-N-<br>ethylethanamine            | 150.30 | 43.32  | 42.66  | 0.66  |
| 2-(Phenoxymethyl)oxirane                                    | 144.80 | 41.81  | 41.15  | 0.66  |
| 1-Bromo-2-methylbutane                                      | 112.50 | 32.95  | 32.29  | 0.66  |
| 2-Mercaptoethanol                                           | 72.30  | 20.61  | 21.27  | -0.66 |
| Isobutyl dichloro phosphorus oxide                          | 134.50 | 38.98  | 38.33  | 0.65  |
| 2-Ethyl-1-pentene                                           | 121.10 | 34.00  | 34.65  | -0.65 |
| 2-Bromobutane                                               | 96.30  | 28.50  | 27.85  | 0.65  |
| 2-Isopropoxyvinyl bis(dimethylamino)<br>phosphorus oxide    | 214.10 | 60.81  | 60.16  | 0.65  |
| 2-Methylenecyclohexanol                                     | 119.70 | 33.62  | 34.27  | -0.65 |
| Menthone                                                    | 166.00 | 46.32  | 46.97  | -0.65 |
| 1,1-Difluoro-1-ethoxy-2-iodoethane                          | 121.80 | 35.49  | 34.84  | 0.65  |
| Octylcyclohexane                                            | 233.70 | 64.89  | 65.54  | -0.65 |
| 2,3-Dimethyloctadecane                                      | 342.60 | 94.76  | 95.41  | -0.65 |
| 1,2-Dimethylcyclohexene                                     | 126.80 | 36.86  | 36.21  | 0.65  |
| 2-Methyl-1-octene                                           | 155.20 | 43.36  | 44.00  | -0.64 |
| 3-Fluoronitrobenzene                                        | 111.60 | 32.69  | 32.05  | 0.64  |
| 1-Ethyl-1H-pyrrole                                          | 102.60 | 30.22  | 29.58  | 0.64  |
| 2,4-Dimethyloctadecane                                      | 342.70 | 94.79  | 95.43  | -0.64 |
| N-Propylaminotriethylsilane                                 | 197.00 | 56.11  | 55.47  | 0.64  |
| 2,2'-Dichlorodiisopropyl ether                              | 146.60 | 41.01  | 41.65  | -0.64 |
| 1-Tetradecanethiol                                          | 263.70 | 74.40  | 73.76  | 0.64  |
| Furfural                                                    | 85.20  | 25.44  | 24.80  | 0.64  |
| 1,2-Difluorotetramethyldisilane                             | 141.20 | 39.53  | 40.16  | -0.63 |

|                                                            |        |        |        |       |
|------------------------------------------------------------|--------|--------|--------|-------|
| 3-Fluorotoluene                                            | 104.60 | 30.76  | 30.13  | 0.63  |
| 3,5,5-Trimethyl-2-cyclohexenone                            | 146.20 | 42.17  | 41.54  | 0.63  |
| 1-Methyl-1-(2',3'-epoxypropyl)-2-oxopyrrolidinium chloride | 177.10 | 49.38  | 50.01  | -0.63 |
| Pentyl dichloro phosphorus oxide                           | 152.30 | 43.84  | 43.21  | 0.63  |
| Methyl 4-bromobutanoate                                    | 125.40 | 35.20  | 35.83  | -0.63 |
| 1-Propoxycyclohexene                                       | 153.80 | 42.99  | 43.62  | -0.63 |
| Sulcatone                                                  | 140.20 | 39.26  | 39.89  | -0.63 |
| t-Nonylmercaptan                                           | 179.40 | 51.27  | 50.64  | 0.63  |
| [1,1'-Bicyclopentyl]-2-one                                 | 157.80 | 44.09  | 44.72  | -0.63 |
| N,N-Dimethylcyclohexylamine                                | 145.00 | 40.58  | 41.21  | -0.63 |
| 2,4,6-Trimethyldodecane                                    | 257.80 | 71.52  | 72.15  | -0.63 |
| cis-3-Heptene                                              | 122.10 | 34.30  | 34.93  | -0.63 |
| Trimethylamine                                             | 73.50  | 20.97  | 21.60  | -0.63 |
| N-Methylpiperidine                                         | 112.80 | 31.75  | 32.37  | -0.62 |
| 3-Pyridinemethanol                                         | 103.80 | 30.53  | 29.91  | 0.62  |
| Isobutyl cyclohexyl-N,N-diethylaminoboronate               | 264.90 | 73.47  | 74.09  | -0.62 |
| Butyl ethyl sulfide                                        | 130.60 | 37.88  | 37.26  | 0.62  |
| 1-Heptanethiol                                             | 146.90 | 42.35  | 41.73  | 0.62  |
| 2-Bromoallyl alcohol                                       | 83.10  | 24.85  | 24.23  | 0.62  |
| Dibutoxy butyl phosphorus                                  | 251.00 | 69.66  | 70.28  | -0.62 |
| 1,2-Dimethylpiperidine                                     | 128.90 | 36.17  | 36.79  | -0.62 |
| 5-Methyl-1-hexene                                          | 122.30 | 34.36  | 34.98  | -0.62 |
| 2-Bromopentane                                             | 113.00 | 33.05  | 32.43  | 0.62  |
| Dichloromethane                                            | 56.60  | 16.34  | 16.96  | -0.62 |
| Dodecyl thiocyanate                                        | 248.70 | 70.27  | 69.65  | 0.62  |
| Tridecyl thiocyanate                                       | 265.40 | 74.85  | 74.23  | 0.62  |
| 1,1,2-Trimethylcyclohexane                                 | 148.80 | 41.63  | 42.25  | -0.62 |
| 1-Bromooctane                                              | 163.50 | 46.90  | 46.28  | 0.62  |
| 2,3-Dimethylnonadecane                                     | 359.20 | 99.34  | 99.96  | -0.62 |
| Nerol                                                      | 173.20 | 49.56  | 48.94  | 0.62  |
| 3-Ethyl-1-pentene                                          | 122.00 | 34.28  | 34.90  | -0.62 |
| Benzylidene fluoride                                       | 109.20 | 30.77  | 31.39  | -0.62 |
| Propyl trichloroacetate                                    | 149.30 | 41.77  | 42.39  | -0.62 |
| Dichloro 4-chlorobutoxyborine                              | 145.50 | 40.73  | 41.34  | -0.61 |
| 3-Chloropropyne                                            | 65.80  | 18.87  | 19.48  | -0.61 |
| 4-Methyl-trans-2-pentene                                   | 105.50 | 29.76  | 30.37  | -0.61 |
| trans-1-Chloropropene                                      | 70.20  | 20.08  | 20.69  | -0.61 |
| Diethylamino bromofluorophosphate                          | 137.10 | 39.65  | 39.04  | 0.61  |
| Tridodecylamine                                            | 623.20 | 172.98 | 172.37 | 0.61  |
| Ethylbutoxychlorosilane                                    | 160.10 | 44.74  | 45.35  | -0.61 |
| 4-Methyl-1-hexene                                          | 122.00 | 34.29  | 34.90  | -0.61 |
| Ethyl 2-bromo-3-methylbutyrate                             | 157.40 | 44.00  | 44.61  | -0.61 |
| 2,2-Dimethyloctadecane                                     | 342.90 | 94.88  | 95.49  | -0.61 |
| 2-Butoxyvinyl bis(dimethylamino) phosphorus oxide          | 231.10 | 65.43  | 64.82  | 0.61  |
| Iodomethylsulfonyl chloride                                | 99.50  | 28.12  | 28.73  | -0.61 |
| 1-Chloro-3-(trifluoromethyl)benzene                        | 128.30 | 36.02  | 36.63  | -0.61 |
| 2,5-Dimethylpyrrole                                        | 102.30 | 30.10  | 29.49  | 0.61  |

|                                        |        |        |        |       |
|----------------------------------------|--------|--------|--------|-------|
| Camphor                                | 154.40 | 44.39  | 43.79  | 0.60  |
| 3-Methylheneicosane                    | 376.50 | 104.10 | 104.70 | -0.60 |
| Pebulate                               | 211.10 | 59.94  | 59.34  | 0.60  |
| n-Pentyl-2-mercaptan                   | 113.10 | 33.06  | 32.46  | 0.60  |
| Linoleic acid                          | 308.70 | 86.71  | 86.11  | 0.60  |
| Butyl-di(3-hydroxypropyl)phosphine     | 217.70 | 61.75  | 61.15  | 0.60  |
| O,O-Dibutyl butylphosphorus thioxide   | 269.00 | 75.82  | 75.22  | 0.60  |
| (6Z)-Octadecenoic acid                 | 317.10 | 87.81  | 88.41  | -0.60 |
| 2-Methyl-1-hexene                      | 121.90 | 34.27  | 34.87  | -0.60 |
| 3,4-Dimethyl-1-pentene                 | 121.90 | 34.27  | 34.87  | -0.60 |
| Diethyl isophthalate                   | 207.50 | 58.95  | 58.35  | 0.60  |
| Ethyl phenoxyacetate                   | 171.30 | 49.02  | 48.42  | 0.60  |
| trans-2-Pentene                        | 88.90  | 25.22  | 25.82  | -0.60 |
| 2-Ethyl-1-butene                       | 104.10 | 29.39  | 29.99  | -0.60 |
| Ethylidenecyclohexane                  | 126.90 | 36.84  | 36.24  | 0.60  |
| trans-1,3,5-Trimethylcyclohexane       | 149.70 | 41.90  | 42.50  | -0.60 |
| Trimethylethylene                      | 87.90  | 24.95  | 25.55  | -0.60 |
| cis-3-Hexene                           | 105.40 | 29.75  | 30.35  | -0.60 |
| Bis(1-chloroethyl)ether                | 115.90 | 32.63  | 33.23  | -0.60 |
| Crotonaldehyde                         | 75.50  | 21.55  | 22.14  | -0.59 |
| Pseudopelletierine                     | 150.00 | 43.17  | 42.58  | 0.59  |
| 1,9-Decadiene                          | 167.10 | 47.86  | 47.27  | 0.59  |
| Diethylsilanol                         | 112.20 | 31.62  | 32.21  | -0.59 |
| Triisobutylamine                       | 221.90 | 61.71  | 62.30  | -0.59 |
| 2-Bromopropane                         | 79.90  | 23.94  | 23.35  | 0.59  |
| 2,2,4,6,6-Pentamethylheptane           | 207.60 | 57.79  | 58.38  | -0.59 |
| n-Butyltrichloroacetate                | 166.00 | 46.38  | 46.97  | -0.59 |
| Ethyl trichloroacetate                 | 132.60 | 37.22  | 37.81  | -0.59 |
| Diethylamino ethyl fluorothiophosphate | 171.50 | 49.06  | 48.48  | 0.58  |
| Allyldiethylamine                      | 132.60 | 38.39  | 37.81  | 0.58  |
| cis-4,4-Dimethyl-2-pentene             | 118.20 | 34.44  | 33.86  | 0.58  |
| 2-Fluoroanisole                        | 114.00 | 32.12  | 32.70  | -0.58 |
| 1,3-Dichloropropane                    | 90.00  | 25.54  | 26.12  | -0.58 |
| 2,5-Di-t-butylfuran                    | 198.90 | 56.57  | 55.99  | 0.58  |
| Chlorotriethylsilane                   | 151.40 | 43.54  | 42.96  | 0.58  |
| Diisobutoxythiophosphonate             | 200.00 | 56.87  | 56.29  | 0.58  |
| Amylsilane                             | 122.60 | 35.64  | 35.06  | 0.58  |
| 4-Methyldocosane                       | 393.10 | 108.68 | 109.26 | -0.58 |
| Thiirane                               | 55.60  | 17.26  | 16.69  | 0.57  |
| 3-Methyl-1-hexene                      | 122.20 | 34.38  | 34.95  | -0.57 |
| Bis(piperidino)methane                 | 197.10 | 56.07  | 55.50  | 0.57  |
| alpha-Terpineol                        | 168.90 | 47.19  | 47.76  | -0.57 |
| Ethyl thioformate                      | 83.50  | 23.77  | 24.34  | -0.57 |
| Carbon suboxide                        | 57.10  | 16.53  | 17.10  | -0.57 |
| 1,1,2-Trichloroethane                  | 87.20  | 25.92  | 25.35  | 0.57  |
| Isopentyl dichloro phosphorus oxide    | 151.30 | 43.50  | 42.93  | 0.57  |
| Hexacosane                             | 445.70 | 123.12 | 123.68 | -0.56 |
| 1-Bromo-2-methoxyethane                | 89.50  | 25.42  | 25.98  | -0.56 |
| Diethoxy butyl phosphorus              | 184.40 | 51.45  | 52.01  | -0.56 |

|                                       |        |        |        |       |
|---------------------------------------|--------|--------|--------|-------|
| 1-Tridecene                           | 222.90 | 62.01  | 62.57  | -0.56 |
| 3-Methyl-2-cyclohexen-1-one           | 113.50 | 33.13  | 32.57  | 0.56  |
| 1-(2-Furyl)-3-ethyl-3-pentanol        | 188.70 | 52.63  | 53.19  | -0.56 |
| 1,1,1-Trifluoro-2-iodoethane          | 84.10  | 23.94  | 24.50  | -0.56 |
| 1-Chlorocyclohexene                   | 109.20 | 31.95  | 31.39  | 0.56  |
| 2-Ethylfuran                          | 99.30  | 28.11  | 28.67  | -0.56 |
| 2-Propanethiol                        | 80.00  | 23.94  | 23.38  | 0.56  |
| 2-Phenoxyethanol                      | 134.80 | 38.97  | 38.41  | 0.56  |
| 2-Methyl-1-butanethiol                | 112.60 | 32.88  | 32.32  | 0.56  |
| trans-Octahydro-1(2H)-naphthalenone   | 158.10 | 44.24  | 44.80  | -0.56 |
| Diethyl nonoxy phosphorus             | 259.20 | 73.09  | 72.53  | 0.56  |
| trans-1,2-Dichloropropene             | 84.20  | 25.09  | 24.53  | 0.56  |
| cis-1-Methyl-4-isopropylcyclohexane   | 165.50 | 46.27  | 46.83  | -0.56 |
| 2,4,6-Trimethyltridecane              | 274.40 | 76.14  | 76.70  | -0.56 |
| Succinyl chloride                     | 111.10 | 31.35  | 31.91  | -0.56 |
| 3-Pentanethiol                        | 112.90 | 32.96  | 32.40  | 0.56  |
| trans-2-Hexene                        | 105.70 | 29.87  | 30.43  | -0.56 |
| cis-4-Octene                          | 138.80 | 38.95  | 39.51  | -0.56 |
| 2-Butanethiol                         | 96.50  | 28.46  | 27.90  | 0.56  |
| 1,1,1-Trichloroacetone                | 105.80 | 31.01  | 30.45  | 0.56  |
| Diethyl ethoxy phosphorus             | 142.30 | 41.02  | 40.47  | 0.55  |
| 1,3,5-Trimethyl-1H-pyrazole           | 115.20 | 32.48  | 33.03  | -0.55 |
| Isopropyl nicotinate                  | 157.40 | 45.16  | 44.61  | 0.55  |
| 2-Methylpyrrole                       | 85.40  | 25.41  | 24.86  | 0.55  |
| t-Butoxytriethylsilane                | 210.20 | 58.54  | 59.09  | -0.55 |
| 2-Fluorotoluene                       | 104.40 | 30.62  | 30.07  | 0.55  |
| Azepane                               | 112.00 | 31.61  | 32.16  | -0.55 |
| 1,3-Pentadiyne                        | 75.10  | 21.49  | 22.03  | -0.54 |
| 5-Cyclohexyleicosane                  | 431.60 | 120.36 | 119.82 | 0.54  |
| 1-Hexanethiol                         | 130.20 | 37.69  | 37.15  | 0.54  |
| Dimethyl sulfide                      | 63.70  | 19.45  | 18.91  | 0.54  |
| Nonylcyclohexane                      | 250.20 | 69.52  | 70.06  | -0.54 |
| 6-Methyl-1-heptene                    | 139.00 | 39.02  | 39.56  | -0.54 |
| 6-Dodecyne                            | 202.00 | 56.30  | 56.84  | -0.54 |
| 3-Methyl-1-butanethiol                | 113.00 | 32.97  | 32.43  | 0.54  |
| Heptyl bromide                        | 146.80 | 42.24  | 41.70  | 0.54  |
| 4-Methylpyrimidine                    | 90.80  | 26.88  | 26.34  | 0.54  |
| 9,10,11,12-Tetrapropyleicosane        | 537.60 | 149.43 | 148.89 | 0.54  |
| Tiglic aldehyde                       | 90.90  | 25.83  | 26.37  | -0.54 |
| 1-Methyl-2-propyl-4-ethyl-pyrrolidine | 178.80 | 49.94  | 50.48  | -0.54 |
| Diethyl phenylmalonate                | 223.30 | 63.22  | 62.68  | 0.54  |
| 3,4-Dimethoxybenzenemethanol          | 159.90 | 45.83  | 45.29  | 0.54  |
| 5-Chloropentanoyl chloride            | 125.60 | 35.35  | 35.89  | -0.54 |
| Chloral                               | 89.80  | 26.60  | 26.07  | 0.53  |
| 1-Chlorohexadecane                    | 292.90 | 81.24  | 81.77  | -0.53 |
| Ethyl propyl sulfide                  | 113.90 | 33.21  | 32.68  | 0.53  |
| 1-Methylpyrrole                       | 85.90  | 25.53  | 25.00  | 0.53  |
| trans-3-heptene                       | 122.20 | 34.42  | 34.95  | -0.53 |
| 1-(Bromomethoxy)-2-methylpropane      | 122.80 | 35.65  | 35.12  | 0.53  |

|                                                          |        |        |        |       |
|----------------------------------------------------------|--------|--------|--------|-------|
| N,N,N',N'-Tetraethyl-1,2-ethylenediamine                 | 199.30 | 55.57  | 56.10  | -0.53 |
| cis-2-Hexene                                             | 105.20 | 29.76  | 30.29  | -0.53 |
| Phenyl ethoxy 2-(propoxycarbonyl)propyl phosphorus oxide | 282.10 | 79.34  | 78.81  | 0.53  |
| Diethoxy propyl phosphorus                               | 167.10 | 46.74  | 47.27  | -0.53 |
| 1,3-Dimethylcyclohexene                                  | 127.70 | 36.99  | 36.46  | 0.53  |
| Isopropyl 2-furoate                                      | 143.40 | 40.24  | 40.77  | -0.53 |
| Ethyl 4-fluorobenzoate                                   | 150.40 | 42.16  | 42.69  | -0.53 |
| Cyclopropylcyclohexane                                   | 143.80 | 40.35  | 40.88  | -0.53 |
| 2-Pyridinemethanol                                       | 103.90 | 30.46  | 29.93  | 0.53  |
| 2,4-Dimethylnonadecane                                   | 359.30 | 99.46  | 99.99  | -0.53 |
| Cyclohexanecarbonyl chloride                             | 133.00 | 37.39  | 37.92  | -0.53 |
| 1-Methyl-4-isopropylcyclohexene                          | 160.20 | 45.90  | 45.38  | 0.52  |
| 1,10-Undecadiyne                                         | 175.20 | 48.97  | 49.49  | -0.52 |
| 1-Isoamylloxycyclohexene                                 | 186.50 | 52.07  | 52.59  | -0.52 |
| Bromoacetone                                             | 81.90  | 23.38  | 23.90  | -0.52 |
| Dipropylsilane                                           | 139.00 | 40.08  | 39.56  | 0.52  |
| 2,6-Dimethylpiperidine                                   | 129.40 | 36.41  | 36.93  | -0.52 |
| Linalyl acetate                                          | 209.90 | 58.49  | 59.01  | -0.52 |
| 2-Fluoro-1,3-butadiene                                   | 72.30  | 20.75  | 21.27  | -0.52 |
| 4-Chlorobutanoyl chloride                                | 108.90 | 30.79  | 31.31  | -0.52 |
| Ethyl mercaptan                                          | 63.40  | 19.34  | 18.83  | 0.51  |
| 4-Methylcyclopentene                                     | 96.10  | 27.28  | 27.79  | -0.51 |
| Bis(diethylamino)borane                                  | 180.80 | 51.54  | 51.03  | 0.51  |
| trans-4-Octene                                           | 139.00 | 39.05  | 39.56  | -0.51 |
| Ethylenedichloride                                       | 73.30  | 21.03  | 21.54  | -0.51 |
| 3-Allylpiperidine                                        | 140.20 | 39.38  | 39.89  | -0.51 |
| Propyl N,N-diethylamino phosphorusoxy chloride           | 178.70 | 50.96  | 50.45  | 0.51  |
| Citronellal                                              | 172.90 | 48.35  | 48.86  | -0.51 |
| 2-Ethylthioethanol                                       | 106.10 | 30.03  | 30.54  | -0.51 |
| 5,5-Dimethyl-1-hexen-3-yne                               | 128.80 | 37.27  | 36.76  | 0.51  |
| 1,1,3-Trichloropropane                                   | 103.90 | 30.44  | 29.93  | 0.51  |
| t-Butoxytrimethylsilane                                  | 160.60 | 44.98  | 45.49  | -0.51 |
| 4-Chloro-2-pentene                                       | 103.00 | 30.19  | 29.69  | 0.50  |
| N,N,N',N'-Tetraethylmethylenediamine                     | 183.80 | 52.35  | 51.85  | 0.50  |
| Methyl pentyl sulfide                                    | 130.50 | 37.73  | 37.23  | 0.50  |
| Hexyl bromide                                            | 130.10 | 37.62  | 37.12  | 0.50  |
| 5-Methyldocosane                                         | 393.00 | 108.73 | 109.23 | -0.50 |
| cis-3,7-Dimethyl-2,6-octadien-1-ol acetate               | 209.90 | 58.51  | 59.01  | -0.50 |
| 2-(Bromomethoxy)butane                                   | 122.20 | 35.45  | 34.95  | 0.50  |
| 2,4-Dimethyleicosane                                     | 376.00 | 104.07 | 104.57 | -0.50 |
| 1,2,3-Trichloropropane                                   | 103.90 | 30.43  | 29.93  | 0.50  |
| 1-Pyrrolidineethanamine                                  | 125.20 | 35.28  | 35.78  | -0.50 |
| Trihexyl tetradecyl phosphonium dicyanamide              | 630.40 | 174.84 | 174.34 | 0.50  |
| Fluorobenzene                                            | 88.30  | 26.15  | 25.65  | 0.50  |
| Ethyl 6-bromohexanoate                                   | 175.40 | 49.05  | 49.55  | -0.50 |
| 3-Methyleneheptane                                       | 137.70 | 38.71  | 39.20  | -0.49 |
| Diethyl sulphide                                         | 97.20  | 28.59  | 28.10  | 0.49  |

|                                                      |        |        |        |       |
|------------------------------------------------------|--------|--------|--------|-------|
| 2-Methyl-1-propanethiol                              | 96.40  | 28.37  | 27.88  | 0.49  |
| Chlorocyclopentane                                   | 98.70  | 28.02  | 28.51  | -0.49 |
| Propylallene                                         | 100.80 | 29.57  | 29.08  | 0.49  |
| 2-Ethoxyvinyl bis(dimethylamino)<br>phosphorus oxide | 197.60 | 56.12  | 55.63  | 0.49  |
| 3-Chloro-2-methylpropene                             | 85.90  | 25.48  | 25.00  | 0.48  |
| Triisooctylamine                                     | 421.40 | 116.54 | 117.02 | -0.48 |
| 1,1,3,3-Tetramethylcyclopentane                      | 150.00 | 42.10  | 42.58  | -0.48 |
| Norpempidine                                         | 160.50 | 44.98  | 45.46  | -0.48 |
| cis-1,2-Dichlorocyclohexane                          | 128.80 | 37.24  | 36.76  | 0.48  |
| O,O-Dibutylthiophosphoric acid                       | 210.00 | 58.56  | 59.04  | -0.48 |
| Trihexylamine                                        | 322.40 | 89.39  | 89.86  | -0.47 |
| 1-Butanethiol                                        | 96.80  | 28.46  | 27.99  | 0.47  |
| trans-1,4-Hexadiene                                  | 99.90  | 29.31  | 28.84  | 0.47  |
| Propanedioyl dichloride                              | 94.20  | 26.80  | 27.27  | -0.47 |
| trans-3-Octene                                       | 139.00 | 39.09  | 39.56  | -0.47 |
| N-Methyl-N-phenyl-difluoroacetamide                  | 155.40 | 44.53  | 44.06  | 0.47  |
| trans-Cyclooctene                                    | 126.20 | 36.52  | 36.05  | 0.47  |
| Butyl N,N-diethylamino phosphorusoxy<br>chloride     | 195.40 | 55.50  | 55.03  | 0.47  |
| Dodecahydrosqualene                                  | 506.50 | 140.83 | 140.36 | 0.47  |
| Nonyl thiocyanate                                    | 198.50 | 56.35  | 55.88  | 0.47  |
| 1,4-Piperazinedipropanamine                          | 214.40 | 60.71  | 60.24  | 0.47  |
| Propargylamine                                       | 63.40  | 18.36  | 18.83  | -0.47 |
| 1-Pentadecene                                        | 256.30 | 71.27  | 71.73  | -0.46 |
| 1,1,3,3-Tetramethyldisiloxane                        | 139.60 | 40.19  | 39.73  | 0.46  |
| 2,3-Dimethyl-2-norbornene                            | 135.70 | 39.12  | 38.66  | 0.46  |
| 3,5-Dimethyl-2-cyclohexen-1-one                      | 130.20 | 37.61  | 37.15  | 0.46  |
| 2,4,6-Trimethyltetradecane                           | 291.00 | 80.79  | 81.25  | -0.46 |
| Undecyl thiocyanate                                  | 232.00 | 65.53  | 65.07  | 0.46  |
| 2,4-Dimethylheneicosane                              | 392.60 | 108.66 | 109.12 | -0.46 |
| Dodecanoyl chloride                                  | 228.30 | 63.60  | 64.05  | -0.45 |
| 3-Chlorocyclopentene                                 | 93.70  | 27.59  | 27.14  | 0.45  |
| Diethyl propoxy phosphorus                           | 159.00 | 45.50  | 45.05  | 0.45  |
| Cyclohexene                                          | 95.00  | 27.04  | 27.49  | -0.45 |
| 1-Bromo-2-propanol                                   | 88.80  | 25.34  | 25.79  | -0.45 |
| 1,4-Dichlorobutane                                   | 106.70 | 30.25  | 30.70  | -0.45 |
| 3-t-Butylfuran                                       | 131.60 | 37.08  | 37.53  | -0.45 |
| Decyl thiocyanate                                    | 215.30 | 60.94  | 60.49  | 0.45  |
| 2,2,3-Trichlorobutyraldehyde                         | 122.30 | 35.43  | 34.98  | 0.45  |
| 1-Ethylcyclohexene                                   | 126.90 | 36.69  | 36.24  | 0.45  |
| 2,2,4-Trimethylpiperidine                            | 145.00 | 40.76  | 41.21  | -0.45 |
| 3-Bromohexane                                        | 129.50 | 37.40  | 36.96  | 0.44  |
| trans-2-Undecene                                     | 189.10 | 52.86  | 53.30  | -0.44 |
| 1,4-Dihydroxybenzene                                 | 101.00 | 29.58  | 29.14  | 0.44  |
| Cyclohexyl acrylate                                  | 155.70 | 43.70  | 44.14  | -0.44 |
| 1-Bromopentane                                       | 113.40 | 32.98  | 32.54  | 0.44  |
| 5-Methyltricosane                                    | 409.70 | 113.37 | 113.81 | -0.44 |
| 1,2-Dichloropentane                                  | 123.10 | 34.76  | 35.20  | -0.44 |

|                                                     |        |        |        |       |
|-----------------------------------------------------|--------|--------|--------|-------|
| 2-Chloro-2-propenenitrile                           | 71.40  | 20.58  | 21.02  | -0.44 |
| 2-Chloro-5-(trifluoromethyl)aniline                 | 139.40 | 40.11  | 39.67  | 0.44  |
| 1,2-Pentadiene                                      | 84.10  | 24.94  | 24.50  | 0.44  |
| N-(2',3'-Epoxypentyl)-N-methylpyrrolidonium acetate | 198.70 | 55.50  | 55.94  | -0.44 |
| trans-1,2-Dichloroethylene                          | 68.10  | 20.55  | 20.11  | 0.44  |
| Triisopentylborane                                  | 275.40 | 76.54  | 76.97  | -0.43 |
| 2,4,6-Trimethyl-3-heptene                           | 169.40 | 48.33  | 47.90  | 0.43  |
| 1-Methyl-4-isopropyl-7-oxabicyclo[2.2.1]heptane     | 166.30 | 46.62  | 47.05  | -0.43 |
| Decylcyclohexane                                    | 266.70 | 74.16  | 74.59  | -0.43 |
| 4-(1-Methylvinyl)-1-cyclohexene-1-methanol          | 146.30 | 41.99  | 41.56  | 0.43  |
| 2-(Methoxymethyl)-5-nitrofuran                      | 131.90 | 38.04  | 37.61  | 0.43  |
| 1,1-Dichloro-3,3-dimethylbutane                     | 138.10 | 39.74  | 39.31  | 0.43  |
| trans-4,4-Dimethyl-2-pentene                        | 121.80 | 34.42  | 34.84  | -0.42 |
| Azocane                                             | 125.30 | 35.38  | 35.80  | -0.42 |
| Bis(cyclohexyl)amine                                | 200.60 | 56.88  | 56.46  | 0.42  |
| Methyldichloro-2-isobutoxyethylsilane               | 192.00 | 54.52  | 54.10  | 0.42  |
| cis- Cyclooctene                                    | 125.50 | 36.28  | 35.86  | 0.42  |
| 2-Methyl-2-pentene                                  | 104.80 | 29.76  | 30.18  | -0.42 |
| Butylsilane                                         | 105.90 | 30.90  | 30.48  | 0.42  |
| Pempidine                                           | 175.30 | 49.10  | 49.52  | -0.42 |
| 2,5-Dimethylfuran                                   | 99.50  | 28.31  | 28.73  | -0.42 |
| 1,2-Bis(dimethylamino)ethane                        | 134.90 | 38.02  | 38.44  | -0.42 |
| 2-Hydroxyethylphosphine                             | 75.90  | 22.67  | 22.25  | 0.42  |
| Adamantane                                          | 145.10 | 41.65  | 41.23  | 0.42  |
| 3-Furancarboxaldehyde                               | 85.20  | 25.22  | 24.80  | 0.42  |
| 1-(2-Furyl)-2-ethyl-3-aminopropane                  | 158.30 | 45.27  | 44.85  | 0.42  |
| Cetene                                              | 273.00 | 75.90  | 76.32  | -0.42 |
| n-Butylmethylsulfide                                | 113.90 | 33.09  | 32.68  | 0.41  |
| 2,4,6-Trimethylpentadecane                          | 307.70 | 85.42  | 85.83  | -0.41 |
| 1,6-Dichlorohexane                                  | 140.10 | 39.45  | 39.86  | -0.41 |
| Chlorotrimethylsilane                               | 102.20 | 29.88  | 29.47  | 0.41  |
| 3,7-Dimethyl-1-octene                               | 171.70 | 48.12  | 48.53  | -0.41 |
| Ethoxytriethylsilane                                | 378.20 | 105.58 | 105.17 | 0.41  |
| cis-1-Chloropropene                                 | 69.50  | 20.09  | 20.50  | -0.41 |
| Dodecylcyclohexane                                  | 300.50 | 83.45  | 83.86  | -0.41 |
| cis-5-Decene                                        | 172.20 | 48.26  | 48.67  | -0.41 |
| Chloroacetylene                                     | 49.10  | 15.31  | 14.90  | 0.41  |
| Tributylsilanol                                     | 243.40 | 67.79  | 68.20  | -0.41 |
| Linalool                                            | 174.20 | 48.81  | 49.22  | -0.41 |
| alpha-Bromoacetoacetic acid ethylester              | 143.10 | 40.28  | 40.69  | -0.41 |
| 2-Trifluoromethylaniline                            | 123.70 | 35.77  | 35.36  | 0.41  |
| O,O-Dimethylthiophosphoric acid                     | 109.70 | 31.12  | 31.52  | -0.40 |
| Ethyl 2-bromoacrylate                               | 120.20 | 34.00  | 34.40  | -0.40 |
| trans-4-Undecene                                    | 189.20 | 52.93  | 53.33  | -0.40 |
| O,O-Diisopropylthiophosphoric acid                  | 174.70 | 49.75  | 49.35  | 0.40  |
| Isopropenylacetylene                                | 79.00  | 23.50  | 23.10  | 0.40  |
| Dimethyl phthalate                                  | 172.30 | 49.09  | 48.69  | 0.40  |



|                                               |        |        |        |       |
|-----------------------------------------------|--------|--------|--------|-------|
| 1-Chlorooctadecane                            | 326.30 | 90.54  | 90.93  | -0.39 |
| cis-5-Methyl-2-hexene                         | 121.80 | 34.45  | 34.84  | -0.39 |
| 1,5-Dichloropentane                           | 123.40 | 34.89  | 35.28  | -0.39 |
| Novoldiamine                                  | 184.10 | 51.54  | 51.93  | -0.39 |
| 4-Bromotridecane                              | 246.40 | 69.41  | 69.02  | 0.39  |
| 2,3,3-Trimethyl-1-pentene                     | 137.10 | 38.65  | 39.04  | -0.39 |
| Dibutoxyphosphinylsulfenyl chloride           | 224.20 | 63.32  | 62.93  | 0.39  |
| Tri-n-octylamine                              | 422.90 | 117.82 | 117.43 | 0.39  |
| Vinyl tris(2-chloropropoxy)silane             | 282.50 | 79.31  | 78.92  | 0.39  |
| 1,4-Cyclohexadiene                            | 90.00  | 26.51  | 26.12  | 0.39  |
| Pyrrole                                       | 68.60  | 20.64  | 20.25  | 0.39  |
| N-Methyl-2-furanmethanamine                   | 111.10 | 31.52  | 31.91  | -0.39 |
| Isobutyl diisobutoxy phosphorus               | 250.00 | 69.62  | 70.01  | -0.39 |
| Difurfuryl ether                              | 163.40 | 46.64  | 46.25  | 0.39  |
| 2-Ethyl-3-methyl-1-butene                     | 120.20 | 34.02  | 34.40  | -0.38 |
| 1-Butylpyridinium dicyanamide                 | 208.00 | 58.87  | 58.49  | 0.38  |
| 2,4-Dimethyldocosane                          | 409.20 | 113.29 | 113.67 | -0.38 |
| 1-Methylimidazole                             | 81.00  | 23.27  | 23.65  | -0.38 |
| Methacryloyl chloride                         | 89.20  | 25.52  | 25.90  | -0.38 |
| Butylcyclohexane                              | 167.00 | 46.86  | 47.24  | -0.38 |
| 1,5-Dimethylcyclopentene                      | 113.00 | 32.05  | 32.43  | -0.38 |
| 6,7-Diamyldodecane                            | 375.50 | 104.05 | 104.43 | -0.38 |
| Ethylaminotriethylsilane                      | 181.00 | 51.46  | 51.08  | 0.38  |
| Dibutyl isophthalate                          | 274.30 | 77.05  | 76.67  | 0.38  |
| 1-Methyl-1H-pyrazole                          | 81.60  | 23.44  | 23.82  | -0.38 |
| 3-Methoxypyridine                             | 104.70 | 30.53  | 30.15  | 0.38  |
| 2-(1-Hydroxybutyl)furan                       | 140.40 | 39.57  | 39.95  | -0.38 |
| 1,1-Dichloroethane                            | 73.20  | 21.14  | 21.51  | -0.37 |
| Dimethylvinylethoxysilane                     | 141.30 | 39.82  | 40.19  | -0.37 |
| Ethyl N,N-diethylamino phosphorusoxy chloride | 162.00 | 46.24  | 45.87  | 0.37  |
| Terpinen-4-ol                                 | 168.20 | 47.20  | 47.57  | -0.37 |
| Tetramethylguanidine                          | 123.50 | 34.94  | 35.31  | -0.37 |
| 5,5-Dimethyl-1-hexene                         | 138.30 | 39.00  | 39.37  | -0.37 |
| cis-1-Chloro-1-butene                         | 86.60  | 24.82  | 25.19  | -0.37 |
| Dicyclohexyl ether                            | 198.60 | 55.54  | 55.91  | -0.37 |
| 1-Hexyl-3-methylimidazolium chloride          | 207.80 | 58.80  | 58.43  | 0.37  |
| Octadecanoyl chloride                         | 328.50 | 91.17  | 91.54  | -0.37 |
| cis-4-Undecene                                | 188.90 | 52.88  | 53.25  | -0.37 |
| Menthylacetate                                | 206.40 | 57.68  | 58.05  | -0.37 |
| Tetramethylsilane                             | 105.30 | 29.95  | 30.32  | -0.37 |
| 1-Chloro-2-nitro-4-(trifluoromethyl)benzene   | 150.60 | 43.11  | 42.74  | 0.37  |
| 1-Methyltetrahydrothiophenium saccharinate    | 244.20 | 68.05  | 68.42  | -0.37 |
| 1-Ethylcyclopentene                           | 112.80 | 32.01  | 32.37  | -0.36 |
| 1-Propanethiol                                | 80.10  | 23.77  | 23.41  | 0.36  |
| 3-Methyl-2-butenal                            | 91.10  | 26.06  | 26.42  | -0.36 |
| 11-Decylheneicosane                           | 527.50 | 145.76 | 146.12 | -0.36 |
| 3-Fluoropyridine                              | 83.80  | 24.06  | 24.42  | -0.36 |
| Pristane                                      | 325.30 | 90.30  | 90.66  | -0.36 |

|                                                                                   |        |        |        |       |
|-----------------------------------------------------------------------------------|--------|--------|--------|-------|
| 2-Bromohexane                                                                     | 129.70 | 37.37  | 37.01  | 0.36  |
| Hexadecylcyclohexane                                                              | 367.30 | 102.54 | 102.18 | 0.36  |
| 2-Cyclohexyltetrahydropyran                                                       | 180.70 | 50.64  | 51.00  | -0.36 |
| 2-Butenoyl chloride                                                               | 89.20  | 26.26  | 25.90  | 0.36  |
| 1-Heptadecene                                                                     | 289.70 | 80.54  | 80.90  | -0.36 |
| DMSO                                                                              | 69.60  | 20.17  | 20.53  | -0.36 |
| Isobutyl trichloroacetate                                                         | 165.70 | 46.53  | 46.88  | -0.35 |
| Triisoamylamine                                                                   | 270.70 | 75.33  | 75.68  | -0.35 |
| Methyl propyl sulfide                                                             | 97.20  | 28.45  | 28.10  | 0.35  |
| Octyl thiocyanate                                                                 | 181.90 | 51.68  | 51.33  | 0.35  |
| 1-Bromobutane                                                                     | 96.70  | 28.31  | 27.96  | 0.35  |
| 1-Piperazineethanamine                                                            | 136.30 | 38.47  | 38.82  | -0.35 |
| 2,3-Dimethyl-1-pentene                                                            | 120.00 | 34.00  | 34.35  | -0.35 |
| 1,3-Dichlorobutane                                                                | 106.40 | 30.27  | 30.62  | -0.35 |
| cis-3-Octene                                                                      | 138.70 | 39.13  | 39.48  | -0.35 |
| 1,2-Butadiene                                                                     | 67.40  | 20.27  | 19.92  | 0.35  |
| trans-5-Methyl-2-(1-methylvinyl)cyclohexanone                                     | 161.10 | 45.97  | 45.62  | 0.35  |
| 1-Octadecene                                                                      | 306.40 | 85.13  | 85.48  | -0.35 |
| Propyl phosphorusoxy dichloride                                                   | 119.00 | 34.42  | 34.08  | 0.34  |
| 1,8-Dichlorooctane                                                                | 173.50 | 48.68  | 49.02  | -0.34 |
| 3-(Trimethylsilyl)-1-propanol                                                     | 147.50 | 41.55  | 41.89  | -0.34 |
| 1,2-Dibromo-1,1-difluoroethane                                                    | 91.30  | 26.82  | 26.48  | 0.34  |
| Cyclopentylamine                                                                  | 96.20  | 27.48  | 27.82  | -0.34 |
| 9,10-Dipropyloctadecane                                                           | 407.70 | 112.92 | 113.26 | -0.34 |
| 1-Decanethiol                                                                     | 197.00 | 55.81  | 55.47  | 0.34  |
| Benzyl isobutyrate                                                                | 177.90 | 50.57  | 50.23  | 0.34  |
| 1-Methylcyclopentene                                                              | 96.30  | 27.51  | 27.85  | -0.34 |
| 2-(Bromomethyl)tetrahydrofuran                                                    | 111.00 | 32.22  | 31.88  | 0.34  |
| 3-Chlorocrotonic acid                                                             | 98.30  | 28.06  | 28.40  | -0.34 |
| 1,2-Dichloropropane                                                               | 89.80  | 25.73  | 26.07  | -0.34 |
| (1-Methylvinyl)cyclopropane                                                       | 98.00  | 27.98  | 28.32  | -0.34 |
| Ethyl methyl sulfide                                                              | 80.50  | 23.85  | 23.52  | 0.33  |
| 2-Methyl-2-pentenal                                                               | 107.80 | 30.67  | 31.00  | -0.33 |
| 1,2-Dichloro-3,4-dimethylpentane                                                  | 154.70 | 44.20  | 43.87  | 0.33  |
| trans-5-Decene                                                                    | 172.40 | 48.39  | 48.72  | -0.33 |
| trans-5-Undecene                                                                  | 189.20 | 53.00  | 53.33  | -0.33 |
| 2-Pyrone                                                                          | 85.70  | 24.62  | 24.94  | -0.32 |
| trans-2-Octenal                                                                   | 142.10 | 40.09  | 40.41  | -0.32 |
| 3-Ethyl-2-methyl-1-pentene                                                        | 136.70 | 38.61  | 38.93  | -0.32 |
| 1,1-Dichloropropane                                                               | 89.70  | 25.72  | 26.04  | -0.32 |
| 1-Nonene                                                                          | 156.10 | 44.57  | 44.25  | 0.32  |
| 2,6-Nonadien-1-ol                                                                 | 158.60 | 44.62  | 44.94  | -0.32 |
| Vinylidenechloride                                                                | 68.10  | 20.43  | 20.11  | 0.32  |
| Bicyclothiophosphate                                                              | 138.40 | 39.71  | 39.40  | 0.31  |
| Diethyl terephthalate                                                             | 207.60 | 58.69  | 58.38  | 0.31  |
| (Diethylamino fluoro thiophosphorus)<br>(diethylamino fluoro oxophosphorus) oxide | 245.30 | 69.03  | 68.72  | 0.31  |
| Tetrahydrodicyclopentadiene                                                       | 146.50 | 41.93  | 41.62  | 0.31  |

|                                                |        |        |        |       |
|------------------------------------------------|--------|--------|--------|-------|
| 1,2,5,6-Tetrahydropyridine                     | 90.40  | 25.92  | 26.23  | -0.31 |
| cis-5-Undecene                                 | 188.80 | 52.91  | 53.22  | -0.31 |
| Ethyl 2-picolinate                             | 141.00 | 40.42  | 40.11  | 0.31  |
| trans-2-Hexenal                                | 108.70 | 30.94  | 31.25  | -0.31 |
| Diethylsilane                                  | 105.60 | 30.71  | 30.40  | 0.31  |
| 1-Methyl-1,3-cyclopentadiene                   | 90.80  | 26.65  | 26.34  | 0.31  |
| Diisopropylboronic anhydride                   | 244.40 | 68.78  | 68.47  | 0.31  |
| Acetylbromide                                  | 65.90  | 19.82  | 19.51  | 0.31  |
| Trimethoxyphenylsilane                         | 184.40 | 52.32  | 52.01  | 0.31  |
| 1-(2-Furyl)-2-ethyl-3-methylaminopropane       | 176.20 | 50.07  | 49.76  | 0.31  |
| Methylpropylsilane                             | 105.70 | 30.73  | 30.43  | 0.30  |
| 1-Bromopropane                                 | 80.00  | 23.68  | 23.38  | 0.30  |
| Di(cyclohexyloxy)dimethylsilane                | 263.50 | 74.01  | 73.71  | 0.30  |
| 1,1-Dichloro-3,3-dimethylpentane               | 154.20 | 44.03  | 43.73  | 0.30  |
| Ethyl (Z)-3-chloro-2-butenate                  | 130.50 | 36.93  | 37.23  | -0.30 |
| Tetradecylcyclohexane                          | 333.90 | 92.72  | 93.02  | -0.30 |
| 2,4,6-Trimethylhexadecane                      | 324.20 | 90.06  | 90.36  | -0.30 |
| Di(2-chloroethyl) chloromaleate                | 203.40 | 57.52  | 57.23  | 0.29  |
| Pyrimidine                                     | 74.30  | 21.52  | 21.81  | -0.29 |
| 1-Chloro-2-butyne                              | 82.60  | 23.80  | 24.09  | -0.29 |
| 2-t-Butylfuran                                 | 132.40 | 37.46  | 37.75  | -0.29 |
| Fenchone                                       | 156.90 | 44.76  | 44.47  | 0.29  |
| 1,2-Dichloro-4,4-dimethylhexane                | 170.50 | 48.49  | 48.20  | 0.29  |
| (Bromomethyl)oxirane                           | 82.20  | 24.27  | 23.98  | 0.29  |
| Isopropylmethylsilane                          | 105.50 | 30.66  | 30.37  | 0.29  |
| S-Ethyl thioacetate                            | 99.60  | 29.04  | 28.75  | 0.29  |
| 3-Ethyl-2-pentene                              | 120.20 | 34.12  | 34.40  | -0.28 |
| Tridecylcyclohexane                            | 317.00 | 88.10  | 88.38  | -0.28 |
| trans-4-Methyl-2-hexene                        | 121.80 | 34.56  | 34.84  | -0.28 |
| trans-Hydrindan                                | 140.10 | 39.58  | 39.86  | -0.28 |
| Methyl N,N-diethylamino phosphorusoxy chloride | 145.30 | 41.57  | 41.29  | 0.28  |
| Diisopentylboronic anhydride                   | 378.60 | 105.56 | 105.28 | 0.28  |
| 2,3-Dimethyl-2-hexene                          | 136.30 | 39.10  | 38.82  | 0.28  |
| cis-Decalin                                    | 155.80 | 43.89  | 44.17  | -0.28 |
| 1-Propylpyridinium dicyanamide                 | 191.50 | 54.24  | 53.96  | 0.28  |
| 2-Fluoro-4-methylpyridine                      | 100.20 | 28.64  | 28.92  | -0.28 |
| 2-Ethylhexanoyl chloride                       | 160.10 | 45.07  | 45.35  | -0.28 |
| 1,2,4-Trimethyl-5-hexadecylcyclohexane         | 416.00 | 115.26 | 115.54 | -0.28 |
| 2-Acetylfuran                                  | 101.60 | 29.58  | 29.30  | 0.28  |
| 2,5-Dimethyl-2-hexene                          | 138.10 | 39.04  | 39.31  | -0.27 |
| 3-Methylcyclopentene                           | 96.20  | 27.55  | 27.82  | -0.27 |
| Dichloroacetyl chloride                        | 89.70  | 26.31  | 26.04  | 0.27  |
| 2,3-Dichloropropanoyl chloride                 | 106.40 | 30.89  | 30.62  | 0.27  |
| O,O-Diethylthiophosphoric acid                 | 143.30 | 40.47  | 40.74  | -0.27 |
| 4-Bromotetradecane                             | 263.10 | 73.87  | 73.60  | 0.27  |
| 1,1-Dichloropropene                            | 84.20  | 24.80  | 24.53  | 0.27  |
| trans-5-Methyl-2-hexene                        | 122.00 | 34.63  | 34.90  | -0.27 |
| 9-methyl-8-heptadecene                         | 304.60 | 85.25  | 84.98  | 0.27  |

|                                                         |        |       |       |       |
|---------------------------------------------------------|--------|-------|-------|-------|
| Butadiyne                                               | 58.30  | 17.16 | 17.43 | -0.27 |
| Cyclodecanone                                           | 161.40 | 45.44 | 45.71 | -0.27 |
| Dihydrocarvone                                          | 161.40 | 45.97 | 45.71 | 0.26  |
| Crotonic acid anhydride                                 | 147.80 | 41.71 | 41.97 | -0.26 |
| Methylthiocyanate                                       | 65.00  | 19.00 | 19.26 | -0.26 |
| cis-3-Methyl-2-hexene                                   | 121.00 | 34.36 | 34.62 | -0.26 |
| Pyridazine                                              | 74.50  | 22.13 | 21.87 | 0.26  |
| Methylphenyldifluorosilane                              | 135.20 | 38.26 | 38.52 | -0.26 |
| trans-Decalin                                           | 156.10 | 44.51 | 44.25 | 0.26  |
| 2-Methyl-1-nonene                                       | 171.80 | 48.30 | 48.56 | -0.26 |
| Spiro[5.5]undecane                                      | 171.20 | 48.65 | 48.39 | 0.26  |
| Chlorocyclohexane                                       | 114.70 | 32.64 | 32.90 | -0.26 |
| 3-Hydroxypropylphosphine                                | 92.60  | 27.09 | 26.83 | 0.26  |
| Sulfurylchloride                                        | 71.90  | 21.41 | 21.16 | 0.25  |
| Isobutyl bromide                                        | 96.30  | 28.10 | 27.85 | 0.25  |
| Acrylic acid chloride                                   | 72.90  | 21.18 | 21.43 | -0.25 |
| Isopropyl N,N-diethylamino phosphorusoxy chloride       | 179.10 | 50.81 | 50.56 | 0.25  |
| 10-Undecenoyl chloride                                  | 205.90 | 58.16 | 57.91 | 0.25  |
| 1,5-Hexadiene                                           | 100.40 | 29.22 | 28.97 | 0.25  |
| 4-Methylpent-3-en-2-one                                 | 105.50 | 30.13 | 30.37 | -0.24 |
| Bromoethane                                             | 63.30  | 19.04 | 18.80 | 0.24  |
| 3,3,5-Trimethylcyclohexyl acrylate                      | 204.30 | 57.23 | 57.47 | -0.24 |
| 4H-Pyran-4-one                                          | 85.70  | 24.70 | 24.94 | -0.24 |
| Butyl phosphorusoxy dichloride                          | 135.60 | 38.87 | 38.63 | 0.24  |
| 2-Chloropropene                                         | 70.20  | 20.45 | 20.69 | -0.24 |
| 2-Ethylthiovinyl bis(ethoxyethoxy) phosphorus oxide     | 289.90 | 81.19 | 80.95 | 0.24  |
| 2,4,6-Trimethylheptadecane                              | 340.90 | 94.70 | 94.94 | -0.24 |
| cis-3,4-Dimethyl-2-pentene                              | 120.80 | 34.33 | 34.57 | -0.24 |
| Placidyl                                                | 134.10 | 37.98 | 38.22 | -0.24 |
| (E)-2-Undecenal                                         | 191.70 | 53.78 | 54.02 | -0.24 |
| Dipropylsulfoxide                                       | 136.10 | 38.53 | 38.77 | -0.24 |
| Isobutylcyclopentane                                    | 148.60 | 41.96 | 42.19 | -0.23 |
| Tetramethylethene                                       | 103.50 | 29.59 | 29.82 | -0.23 |
| 2-Chloro-2,4,4-trimethylpentane                         | 156.00 | 43.99 | 44.22 | -0.23 |
| 1,7-Dichloroheptane                                     | 156.80 | 44.21 | 44.44 | -0.23 |
| 3,6-Dimethyl-3-heptene                                  | 154.10 | 43.47 | 43.70 | -0.23 |
| Thioacetic acid                                         | 66.00  | 19.77 | 19.54 | 0.23  |
| Methylenecyclobutane                                    | 80.70  | 23.34 | 23.57 | -0.23 |
| Pentadecylcyclohexane                                   | 350.60 | 97.37 | 97.60 | -0.23 |
| N-Butylpiperidine                                       | 162.40 | 45.75 | 45.98 | -0.23 |
| Hexadecanoyl chloride                                   | 295.10 | 82.15 | 82.38 | -0.23 |
| Allyl 2-furancarboxylate                                | 138.90 | 39.76 | 39.53 | 0.23  |
| Ethyl thiocyanate                                       | 81.70  | 24.07 | 23.84 | 0.23  |
| 1-Phenyl-2-hexyl-3,5-dimethylpyrazolium methylsulfonate | 331.70 | 92.64 | 92.42 | 0.22  |
| Diethoxyphosphinylsulfenyl chloride                     | 157.40 | 44.83 | 44.61 | 0.22  |
| 2-Fluoro-6-methylpyridine                               | 100.10 | 28.67 | 28.89 | -0.22 |
| Dipropoxyphosphinylsulfenyl chloride                    | 190.80 | 53.99 | 53.77 | 0.22  |

|                                                             |        |        |        |       |
|-------------------------------------------------------------|--------|--------|--------|-------|
| 1,7-Octadiene                                               | 133.80 | 38.35  | 38.13  | 0.22  |
| 2,3-Dichlorobutane                                          | 106.20 | 30.35  | 30.56  | -0.21 |
| 2-Methyl-2-chloropentadecane                                | 292.10 | 81.34  | 81.55  | -0.21 |
| Methylenecyclohexane                                        | 111.20 | 32.15  | 31.94  | 0.21  |
| 4-Methyl-1H-imidazole                                       | 80.60  | 23.33  | 23.54  | -0.21 |
| 3-Methylbutyl trichloroacetate                              | 182.10 | 51.17  | 51.38  | -0.21 |
| 3-Methylcyclohexene                                         | 111.50 | 31.81  | 32.02  | -0.21 |
| 4(10)-Thujene-3-ol                                          | 162.30 | 46.16  | 45.95  | 0.21  |
| 1-Octyl-3-methylimidazolium chloride                        | 241.20 | 67.80  | 67.59  | 0.21  |
| 2-Methyl-2-heptene                                          | 138.40 | 39.19  | 39.40  | -0.21 |
| 3,3,5-Trimethylcyclohexanone                                | 148.20 | 41.88  | 42.08  | -0.20 |
| Bis(2-hydroxyethyl)phosphine                                | 118.20 | 34.06  | 33.86  | 0.20  |
| 3-Methyl-cis-2-pentene                                      | 103.90 | 29.73  | 29.93  | -0.20 |
| 11,12-Dipropyldocosane                                      | 476.10 | 131.82 | 132.02 | -0.20 |
| 2,3-Dichloro-2-methylbutane                                 | 122.00 | 35.10  | 34.90  | 0.20  |
| cis-1,2-Dichloroethylene                                    | 67.90  | 20.26  | 20.06  | 0.20  |
| Methyl phenoxyacetate                                       | 154.60 | 43.64  | 43.84  | -0.20 |
| 1-Nonadecene                                                | 323.10 | 89.86  | 90.06  | -0.20 |
| 1,3-Dimethyl-1H-pyrazole                                    | 98.40  | 28.23  | 28.43  | -0.20 |
| 1,4-Dimethylpiperazine                                      | 124.90 | 35.50  | 35.69  | -0.19 |
| 4-Chloro-1-butene                                           | 86.80  | 25.05  | 25.24  | -0.19 |
| 2,2,3,4,4-Pentamethylpentane                                | 171.20 | 48.20  | 48.39  | -0.19 |
| trans-Geraniol                                              | 172.60 | 48.97  | 48.78  | 0.19  |
| Ethyl nicotinate                                            | 141.10 | 40.33  | 40.14  | 0.19  |
| Allyl chloride                                              | 70.10  | 20.47  | 20.66  | -0.19 |
| 2,2-Dichlorohexane                                          | 139.50 | 39.89  | 39.70  | 0.19  |
| 2,4-Dimethyl-2-pentene                                      | 120.80 | 34.38  | 34.57  | -0.19 |
| 2-Isobutylfuran                                             | 131.70 | 37.37  | 37.56  | -0.19 |
| 1,2-Dimethylcyclopentene                                    | 113.10 | 32.27  | 32.46  | -0.19 |
| 6,6-Dimethylbicyclo(3.1.1)heptan-2-one                      | 139.70 | 39.94  | 39.75  | 0.19  |
| Acetic acid 2-phenoxyethylester                             | 170.80 | 48.47  | 48.28  | 0.19  |
| trans-2-Methyl-3-hexene                                     | 122.10 | 34.74  | 34.93  | -0.19 |
| 2,9-Dimethyl-5,6-diisoamyldecane                            | 371.00 | 103.38 | 103.20 | 0.18  |
| 1-Pentanethiol                                              | 113.50 | 32.75  | 32.57  | 0.18  |
| 1,2-Dichlorobutane                                          | 106.30 | 30.41  | 30.59  | -0.18 |
| 2-Nonenal                                                   | 158.80 | 44.81  | 44.99  | -0.18 |
| 2-Chloro-1-butene                                           | 86.50  | 24.98  | 25.16  | -0.18 |
| 3-Cyclohexyl-1-propyne                                      | 156.20 | 44.10  | 44.28  | -0.18 |
| cis-1,4-Hexadiene                                           | 99.70  | 28.96  | 28.78  | 0.18  |
| 2-Cyclohexyltetradecane                                     | 332.60 | 92.84  | 92.66  | 0.18  |
| Vinylacetylene                                              | 62.60  | 18.43  | 18.61  | -0.18 |
| Hexyldichloroborane                                         | 154.80 | 44.07  | 43.89  | 0.18  |
| 1,10-Dichlorodecane                                         | 206.90 | 58.01  | 58.19  | -0.18 |
| Bromomethane                                                | 46.60  | 14.39  | 14.22  | 0.17  |
| 2,3-Dichloropentane                                         | 122.60 | 34.89  | 35.06  | -0.17 |
| 2,4-Difluoroaniline                                         | 104.50 | 30.27  | 30.10  | 0.17  |
| 1-Phenyl-2-pentyl-3,5-dimethylpyrazolium<br>methylsulfonate | 313.20 | 87.17  | 87.34  | -0.17 |
| Ethyl-diisopropylamin                                       | 154.00 | 43.51  | 43.68  | -0.17 |

|                                                                    |        |        |        |       |
|--------------------------------------------------------------------|--------|--------|--------|-------|
| Imidazole                                                          | 63.80  | 18.77  | 18.93  | -0.16 |
| 1-(2-Furyl)-3-aminoheptane                                         | 193.40 | 54.32  | 54.48  | -0.16 |
| Methyldichlorobutoxysilane                                         | 157.00 | 44.66  | 44.50  | 0.16  |
| 1-(2-Furyl)-2-methyl-3-aminopropane                                | 143.30 | 40.90  | 40.74  | 0.16  |
| Methyl trichloromethyl ether                                       | 96.60  | 28.09  | 27.93  | 0.16  |
| 2-Chlorocrotonaldehyde                                             | 88.80  | 25.95  | 25.79  | 0.16  |
| 3-Methyl-1H-pyrazole                                               | 80.40  | 23.33  | 23.49  | -0.16 |
| 3-Methyl-6-isopropyl-2-cyclohexen-1-ol                             | 168.30 | 47.44  | 47.60  | -0.16 |
| Isopulegol                                                         | 168.30 | 47.44  | 47.60  | -0.16 |
| Cyclopentadiene                                                    | 74.00  | 21.89  | 21.73  | 0.16  |
| N-Ethyl-2-methylallylamine                                         | 117.40 | 33.48  | 33.64  | -0.16 |
| Propylhexedrine                                                    | 176.60 | 50.03  | 49.87  | 0.16  |
| Amyl thiocyanate                                                   | 131.80 | 37.74  | 37.59  | 0.15  |
| trans-2-Butene                                                     | 72.30  | 21.42  | 21.27  | 0.15  |
| Tributylsilylamine                                                 | 248.00 | 69.61  | 69.46  | 0.15  |
| 2-Methyl-2-hexene                                                  | 121.50 | 34.61  | 34.76  | -0.15 |
| 1-Ethynylcyclohexanamine                                           | 135.50 | 38.45  | 38.60  | -0.15 |
| trans-1-Chloro-1-butene                                            | 86.90  | 25.42  | 25.27  | 0.15  |
| Pentyldichloroborane                                               | 138.20 | 39.49  | 39.34  | 0.15  |
| 3-Bromopropanenitrile                                              | 81.20  | 23.56  | 23.71  | -0.15 |
| 2-Cyclohexyl-2-methylpentadecane                                   | 365.10 | 101.72 | 101.58 | 0.14  |
| 1,4-Oxathiane                                                      | 95.50  | 27.77  | 27.63  | 0.14  |
| 1-Butyl-3-methylimidazolium 2-acryloamido-2-methylpropanesulfonate | 318.00 | 88.52  | 88.66  | -0.14 |
| 1,3,5-Triethylborazine                                             | 186.60 | 52.48  | 52.62  | -0.14 |
| S-Propylthioacetate                                                | 116.30 | 33.47  | 33.33  | 0.14  |
| Bromomethylether                                                   | 72.80  | 21.27  | 21.40  | -0.13 |
| Hydrogen sulfide                                                   | 29.50  | 9.66   | 9.53   | 0.13  |
| Tripropylsilane                                                    | 186.60 | 52.75  | 52.62  | 0.13  |
| 2,4,6-Trimethyloctadecane                                          | 357.50 | 99.36  | 99.49  | -0.13 |
| 3-Fluoroanisole                                                    | 114.20 | 32.89  | 32.76  | 0.13  |
| 3-Fluorophenetole                                                  | 130.90 | 37.47  | 37.34  | 0.13  |
| 2-Ethyl-3-methyl-1-pentene                                         | 136.30 | 38.69  | 38.82  | -0.13 |
| 2,6-Dimethyl-2-heptene                                             | 154.60 | 43.71  | 43.84  | -0.13 |
| 3-Methyl-2-pentyl-2-cyclopenten-1-one                              | 182.00 | 51.23  | 51.36  | -0.13 |
| Phytol                                                             | 342.50 | 95.50  | 95.38  | 0.12  |
| Triethylsilane                                                     | 138.70 | 39.60  | 39.48  | 0.12  |
| 2-Furancarbonitrile                                                | 83.40  | 24.43  | 24.31  | 0.12  |
| 1-(2-Furyl)-3-aminononane                                          | 226.60 | 63.47  | 63.59  | -0.12 |
| O,O-Dipropylthiophosphoric acid                                    | 176.70 | 50.02  | 49.90  | 0.12  |
| Methylconiine                                                      | 161.80 | 45.93  | 45.81  | 0.12  |
| 2,3,4-Trimethyl-2-pentene                                          | 136.60 | 38.79  | 38.90  | -0.11 |
| Methylenecyclopentane                                              | 94.80  | 27.55  | 27.44  | 0.11  |
| Bicyclo[2.2.1]hept-5-ene-2-carbaldehyde                            | 121.50 | 34.65  | 34.76  | -0.11 |
| 2,3-Dimethyl-1-butene                                              | 104.40 | 29.96  | 30.07  | -0.11 |
| 4-Bromobutyronitrile                                               | 97.90  | 28.18  | 28.29  | -0.11 |
| 1-(2-Furyl)-3-aminopentane                                         | 160.20 | 45.27  | 45.38  | -0.11 |
| 2,4,6-Trimethylnonadecane                                          | 374.10 | 103.94 | 104.05 | -0.11 |
| Bicyclo[2.2.1]hept-5-ene-2-carbonitrile                            | 119.80 | 34.40  | 34.29  | 0.11  |

|                                          |        |        |        |       |
|------------------------------------------|--------|--------|--------|-------|
| cis-3-Methyl-2-heptene                   | 136.90 | 39.09  | 38.99  | 0.10  |
| Isophorol                                | 151.70 | 42.94  | 43.04  | -0.10 |
| 2-Fluorophenylethylether                 | 131.00 | 37.47  | 37.37  | 0.10  |
| O,O-Diisobutylthiophosphoric acid        | 209.70 | 58.85  | 58.95  | -0.10 |
| Octahydroindolizine                      | 136.00 | 38.84  | 38.74  | 0.10  |
| 1-(2-Furyl)-3-methylaminopentane         | 176.00 | 49.81  | 49.71  | 0.10  |
| 1-(2-Furyl)-3-aminobutane                | 143.80 | 40.78  | 40.88  | -0.10 |
| 1-Eicosene                               | 339.80 | 94.54  | 94.64  | -0.10 |
| (Trichloromethyl)oxirane                 | 105.70 | 30.33  | 30.43  | -0.10 |
| 1,2-Dichloro-2-methylpropane             | 106.10 | 30.44  | 30.54  | -0.10 |
| 2,4,6,8-Tetramethylcyclotetrasiloxane    | 202.70 | 57.13  | 57.03  | 0.10  |
| cis-2-Chloro-2-butene                    | 86.30  | 25.01  | 25.11  | -0.10 |
| Octadecylcyclohexane                     | 400.20 | 111.30 | 111.20 | 0.10  |
| 2-Bromoisobutyronitrile                  | 97.60  | 28.11  | 28.21  | -0.10 |
| t-Butoxytripropylsilane                  | 259.40 | 72.68  | 72.58  | 0.10  |
| 3-Methyl-trans-2-pentene                 | 103.50 | 29.73  | 29.82  | -0.09 |
| Decanoyl chloride                        | 194.90 | 54.80  | 54.89  | -0.09 |
| Vinylcyclohexane                         | 127.90 | 36.61  | 36.52  | 0.09  |
| Isobutyl cyclohexylchloroboronate        | 202.10 | 56.96  | 56.87  | 0.09  |
| Methyl Z,Z-9,12-octadecadieneoate        | 327.70 | 91.41  | 91.32  | 0.09  |
| cis-3-Methyl-3-hexene                    | 121.10 | 34.56  | 34.65  | -0.09 |
| 1-Chloro-2-methyl-1-propene              | 85.80  | 25.06  | 24.97  | 0.09  |
| 1-Dodecyl-2-methylcyclohexane            | 316.40 | 88.13  | 88.22  | -0.09 |
| 1-(2-Furyl)-3-aminoheptane               | 176.80 | 49.84  | 49.93  | -0.09 |
| 3-Chloro-1-butene                        | 86.50  | 25.25  | 25.16  | 0.09  |
| Cyclohexylideneacetonitrile              | 128.20 | 36.51  | 36.60  | -0.09 |
| 6-Bromo-2-hexanone                       | 131.60 | 37.62  | 37.53  | 0.09  |
| 1-Cyclohexyl-4-hexyldecane               | 365.70 | 101.83 | 101.74 | 0.09  |
| (+)-alpha-Thujene                        | 155.70 | 44.23  | 44.14  | 0.09  |
| 4-Trifluoromethylaniline                 | 125.50 | 35.77  | 35.86  | -0.09 |
| 4-Methylpentyl dichloro phosphorus oxide | 168.50 | 47.74  | 47.65  | 0.09  |
| Ethyl (E)-3-chloro-2-butenolate          | 130.20 | 37.06  | 37.15  | -0.09 |
| Diethyl benzylmalonate                   | 239.10 | 66.93  | 67.02  | -0.09 |
| Trichloronitromethane                    | 93.80  | 27.25  | 27.16  | 0.09  |
| trans-2-Chloro-2-butene                  | 86.30  | 25.02  | 25.11  | -0.09 |
| 3-Thioxobutyric acid ethylester          | 135.70 | 38.74  | 38.66  | 0.08  |
| 2-Acetoxyethylphosphine                  | 112.50 | 32.21  | 32.29  | -0.08 |
| Triisopropylethoxysilane                 | 226.20 | 63.56  | 63.48  | 0.08  |
| 1,1-Dichlorobutane                       | 106.40 | 30.54  | 30.62  | -0.08 |
| 5-Bromovaleronitrile                     | 114.60 | 32.79  | 32.87  | -0.08 |
| 2-Methoxy-1,3-butadiene                  | 93.00  | 27.02  | 26.94  | 0.08  |
| cis-4-Methyl-2-hexene                    | 120.60 | 34.44  | 34.51  | -0.07 |
| iso-Amyl dichloro phosphorus oxide       | 151.80 | 43.00  | 43.07  | -0.07 |
| 1,3,5-Tributylborazine                   | 285.20 | 79.59  | 79.66  | -0.07 |
| 4-Methylcyclohexene                      | 111.00 | 31.81  | 31.88  | -0.07 |
| Geranyl acetate                          | 209.40 | 58.94  | 58.87  | 0.07  |
| Triethylsilylamine                       | 147.90 | 42.07  | 42.00  | 0.07  |
| (-)-alpha-Pinene                         | 137.40 | 39.19  | 39.12  | 0.07  |
| 2-Methyl-1-heptene                       | 138.40 | 39.33  | 39.40  | -0.07 |

|                                                         |        |        |        |       |
|---------------------------------------------------------|--------|--------|--------|-------|
| Methylenebis(4-cyclohexylisocyanate)                    | 257.10 | 72.02  | 71.95  | 0.07  |
| Butyl thiocyanate                                       | 115.10 | 33.07  | 33.01  | 0.06  |
| Trimethyl trimellitate                                  | 217.30 | 61.10  | 61.04  | 0.06  |
| Trichlorofluoroethene                                   | 87.00  | 25.36  | 25.30  | 0.06  |
| 1-Dodecyl-3-methylcyclohexane                           | 317.10 | 88.35  | 88.41  | -0.06 |
| Diethyl ethylphenylmalonate                             | 254.50 | 71.30  | 71.24  | 0.06  |
| 2,4,6-Trimethyleicosane                                 | 390.70 | 108.54 | 108.60 | -0.06 |
| 1-Dodecylpiperidine                                     | 296.00 | 82.68  | 82.62  | 0.06  |
| 1-(2-Furanyl)-1-propanone                               | 118.60 | 33.91  | 33.97  | -0.06 |
| Vinylcyclopentane                                       | 112.00 | 32.10  | 32.16  | -0.06 |
| 1-Ethyl-3-methylimidazolium thiocyanate                 | 170.70 | 48.31  | 48.26  | 0.05  |
| cis-2-Methyl-3-hexene                                   | 121.00 | 34.57  | 34.62  | -0.05 |
| trans-3-Methyl-3-hexene                                 | 121.00 | 34.57  | 34.62  | -0.05 |
| 1-Cyclopentene-1-carboxaldehyde                         | 98.90  | 28.51  | 28.56  | -0.05 |
| 1,8-Nonadiene                                           | 150.40 | 42.74  | 42.69  | 0.05  |
| Cyclohexyloxytrimethylsilane                            | 184.60 | 52.12  | 52.07  | 0.05  |
| Isopropylthioacetate                                    | 115.30 | 33.01  | 33.06  | -0.05 |
| beta-Terpineol                                          | 167.50 | 47.33  | 47.38  | -0.05 |
| Cyclodecane                                             | 162.20 | 45.97  | 45.92  | 0.05  |
| 2-Cyclohexylcyclohexanone                               | 189.80 | 53.54  | 53.49  | 0.05  |
| 2,3-Dimethyl-1-hexene                                   | 137.70 | 39.16  | 39.20  | -0.04 |
| 4-Fluoroanisole                                         | 114.00 | 32.66  | 32.70  | -0.04 |
| 1-Pentylpyridinium dicyanamide                          | 225.90 | 63.44  | 63.40  | 0.04  |
| Diallylamine                                            | 112.50 | 32.25  | 32.29  | -0.04 |
| Cyclogeraniolane                                        | 149.60 | 42.51  | 42.47  | 0.04  |
| gamma-Coniceine                                         | 139.10 | 39.63  | 39.59  | 0.04  |
| Geranyl 2-methylpropanoate                              | 242.50 | 67.99  | 67.95  | 0.04  |
| 2,3-Dimethyl-2-pentene                                  | 119.60 | 34.20  | 34.24  | -0.04 |
| Propyl thiocyanate                                      | 98.40  | 28.39  | 28.43  | -0.04 |
| Ethyl dichlorocarbamate                                 | 115.50 | 33.15  | 33.12  | 0.03  |
| 1-(2-Furyl)-3-methylaminobutane                         | 160.20 | 45.41  | 45.38  | 0.03  |
| Nonanedioyl dichloride                                  | 194.50 | 54.75  | 54.78  | -0.03 |
| 2-Ethylthiovinyl bis(methoxyethoxy)<br>phosphorus oxide | 256.10 | 71.71  | 71.68  | 0.03  |
| Allylcyclopentane                                       | 128.50 | 36.71  | 36.68  | 0.03  |
| 1-Ethylpiperidine                                       | 129.00 | 36.79  | 36.82  | -0.03 |
| trans-3,4-Dimethyl-2-pentene                            | 120.10 | 34.35  | 34.38  | -0.03 |
| Bicyclohexane                                           | 188.70 | 53.22  | 53.19  | 0.03  |
| 2,5-Dimethyl-4-hendecene                                | 220.50 | 61.94  | 61.92  | 0.02  |
| Decanedioyl dichloride                                  | 211.20 | 59.34  | 59.36  | -0.02 |
| Isopropyl trichloroacetate                              | 148.60 | 42.17  | 42.19  | -0.02 |
| 1-(2-Furyl)-2-methyl-3-methylaminopropane               | 160.30 | 45.38  | 45.40  | -0.02 |
| 1-(1-Cyclohexen-1-yl)ethanone                           | 129.80 | 37.06  | 37.04  | 0.02  |
| 3-Bromo-1-propanol                                      | 88.90  | 25.84  | 25.82  | 0.02  |
| Diethylmethylchlorosilane                               | 135.50 | 38.62  | 38.60  | 0.02  |
| 2,4,6-Trimethylheneicosane                              | 407.30 | 113.17 | 113.15 | 0.02  |
| 4-Fluorophenetole                                       | 130.80 | 37.33  | 37.31  | 0.02  |
| Hexahydro-1-methyl-1H-1,4-diazepine                     | 123.80 | 35.41  | 35.39  | 0.02  |
| 2-Chloroethanesulfonyl chloride                         | 105.70 | 30.41  | 30.43  | -0.02 |



|                                  |        |       |       |       |
|----------------------------------|--------|-------|-------|-------|
| 1-Methylcyclohexene              | 111.20 | 31.92 | 31.94 | -0.02 |
| Ethyl (4-methoxyphenyl)acetate   | 187.10 | 52.74 | 52.75 | -0.01 |
| Methyl isonicotinate             | 124.50 | 35.57 | 35.58 | -0.01 |
| Cycloheptene                     | 110.40 | 31.73 | 31.72 | 0.01  |
| 2-Methyl-2-cyclohexen-1-one      | 113.50 | 32.58 | 32.57 | 0.01  |
| Trichloromethylchloroformate     | 113.50 | 32.58 | 32.57 | 0.01  |
| 1-Ethyl-2-pyrrolidinemethanamine | 140.90 | 40.07 | 40.08 | -0.01 |
| Dibutoxythiophosphonate          | 200.40 | 56.39 | 56.40 | -0.01 |
| 4-Fluorobenzeneacetonitrile      | 122.00 | 34.91 | 34.90 | 0.01  |
| 1-Methoxybut-1-yn-3-ene          | 88.90  | 25.83 | 25.82 | 0.01  |
| Cyclododecanone                  | 194.60 | 54.82 | 54.81 | 0.01  |
| Chlorodifluoromethoxybenzene     | 132.50 | 37.77 | 37.78 | -0.01 |
| trans-2,2-Dimethyl-3-hexene      | 138.50 | 39.43 | 39.42 | 0.01  |
| Allyldimethylamine               | 101.10 | 29.16 | 29.17 | -0.01 |
| Bromochloroacetic acid           | 88.70  | 25.76 | 25.76 | 0.00  |
| Tetraethylsilane                 | 171.10 | 48.37 | 48.37 | 0.00  |
| 1,4-Pentadiene                   | 83.60  | 24.37 | 24.37 | 0.00  |
| 2-Chlorofuran                    | 80.10  | 23.41 | 23.41 | 0.00  |
| Dimethyl isophthalate            | 174.10 | 49.19 | 49.19 | 0.00  |
| Hexamethylphosphoramide          | 167.80 | 47.46 | 47.46 | 0.00  |
