# Supplementary material
Source: MDPI journal article supplement (https://www.mdpi.com/2673-8015/2/4/20)
Supplement: s1 [file s1]

| Name                                                                | Refractivity exp. | Refractivity calc | Difference |
|---------------------------------------------------------------------|-------------------|-------------------|------------|
| Tetraisothiocyanatosilane                                           | 49.55             | 69.83             | -20.28     |
| 1-Butyltetrahydrothiophenium bis(trifluoromethylsulfonyl)amide      | 59.14             | 77.28             | -18.14     |
| Phthalide                                                           | 72.84             | 55.04             | 17.80      |
| Tributylsilyl bromide                                               | 87.75             | 74.35             | 13.40      |
| PEG-5 cocomonium methylsulfate                                      | 97.54             | 84.61             | 12.93      |
| N-Nitroso-N-methylaniline                                           | 40.03             | 28.52             | 11.51      |
| Dihexylphenylcarbinol                                               | 99.72             | 88.24             | 11.48      |
| Omethoate                                                           | 47.40             | 58.40             | -11.00     |
| Amiton                                                              | 71.39             | 81.98             | -10.59     |
| Demeton-S-methyl                                                    | 57.04             | 67.50             | -10.46     |
| 1-(2-Cyanoethyl)-3-octylimidazolium trifluoromethanesulfonate       | 95.85             | 85.71             | 10.14      |
| Methylhydrazine                                                     | 13.69             | 4.29              | 9.40       |
| 3-(2-Cyanoethyl)-1-hexylimidazolium 1,1,1-trifluoromethanesulfonate | 85.35             | 76.45             | 8.90       |
| 2-Phenoxyvinyl bis(dimethylamino) phosphorus oxide                  | 62.86             | 71.65             | -8.79      |
| Bis(perfluorobutyl) 3-methylglutarate                               | 82.57             | 74.39             | 8.18       |
| 4-Ethoxyazobenzene                                                  | 78.57             | 70.47             | 8.10       |
| Bis(butylthio) 2-phenylethyl borane                                 | 102.02            | 94.23             | 7.79       |
| Trimethylammonium hydrogen sulfate                                  | 26.69             | 34.30             | -7.61      |
| 1,2,3,4-Tetrachlorobenzene                                          | 38.67             | 45.80             | -7.13      |
| Dimethyldi-2-dodecoxysilane                                         | 126.53            | 133.63            | -7.10      |
| 2-Ethoxyvinyl bis(diethylamino) phosphorus oxide                    | 67.51             | 74.52             | -7.01      |
| Tetra(1H,1H-perfluoropropyl)silicate                                | 66.78             | 73.62             | -6.84      |
| Dipropylphosphine                                                   | 46.78             | 40.09             | 6.69       |
| 1-(2-Cyanoethyl)-3-octylimidazolium benzenesulfonate                | 99.04             | 105.62            | -6.58      |
| Trimethylammonium acetate                                           | 26.93             | 33.20             | -6.27      |
| Di-n-butylsulfoxide                                                 | 54.12             | 47.98             | 6.14       |
| 1-(2-Cyanoethyl)-3-octylimidazolium dodecylsulfate                  | 131.08            | 137.11            | -6.03      |
| Hexyl ethoxy S-ethyl dithiophosphinate                              | 68.06             | 74.08             | -6.02      |
| Truxene                                                             | 114.91            | 109.41            | 5.50       |
| trans-Stilbene                                                      | 65.77             | 60.38             | 5.39       |
| 2-Phenoxyvinyl bis(1-piperidyl) phosphorus oxide                    | 89.67             | 94.99             | -5.32      |
| L-Glutamic acid 1,5-bis(1-methylethyl) ester dodecyl sulfate        | 133.53            | 128.21            | 5.32       |
| 1,6-Bis(7-H-perfluoroheptoxy)hexane                                 | 108.93            | 103.68            | 5.25       |
| 2,5-Diphenyloxazole                                                 | 70.72             | 65.53             | 5.19       |
| 2-Iodopentane                                                       | 43.66             | 38.49             | 5.17       |
| 1-Ethyltetrahydrothiophenium nitrate                                | 38.21             | 43.34             | -5.13      |
| 2-Dimethylaminoethyl dimethylammonium acetate                       | 45.69             | 50.80             | -5.11      |
| Phenazone                                                           | 57.44             | 62.54             | -5.10      |
| 1,1,5,5-Tetra(ethylthio)-pent-2-yne                                 | 97.39             | 92.29             | 5.10       |
| Triethylammonium hydrogen sulfate                                   | 52.66             | 47.56             | 5.10       |
| 2-Ethyl-3-(2-furyl)acrolein                                         | 47.88             | 42.84             | 5.04       |
| Hexafluoro-1,3-butadiene                                            | 24.06             | 19.06             | 5.00       |
| 1-Ethoxy-1,3,5-hexatriene                                           | 44.83             | 39.86             | 4.97       |
| 3-(2-Cyanoethyl)-1-hexylimidazolium benzenesulfonate                | 91.39             | 96.36             | -4.97      |
| Triphenoxisothiocyanatosilane                                       | 97.36             | 102.29            | -4.93      |
| N-Ethylpyridinium trifluoroacetate                                  | 51.01             | 46.09             | 4.92       |
| Dibenzo[b,e]pyridine                                                | 64.30             | 59.40             | 4.90       |
| 3-(2-Cyanoethyl)-1-hexylimidazolium dodecyl sulfate                 | 122.95            | 127.85            | -4.90      |
| Ethyl-bis(butylthio)-thiophosphinate                                | 78.58             | 83.45             | -4.87      |
| 3-Bromo-3-chloropentane                                             | 33.53             | 38.31             | -4.78      |
| 2-Methyl-3-(2-furyl)acrolein                                        | 42.93             | 38.21             | 4.72       |
| 9,10-Anthraquinone                                                  | 64.10             | 59.38             | 4.72       |
| Ethylisobutylchlorosilane                                           | 39.21             | 43.88             | -4.67      |
| N,N-Dimethyl-N-ethylammonium acetate                                | 33.05             | 37.62             | -4.57      |
| Bis(diethylamino)bis(dibutylamino)silane                            | 130.21            | 134.71            | -4.50      |
| Dimethyldidecoxysilane                                              | 110.74            | 115.11            | -4.37      |
| Dimethyl decyl isopropylammonium bis(trifluoromethylsulfonyl)amide  | 111.11            | 106.76            | 4.35       |
| Dixanthylene                                                        | 114.20            | 109.92            | 4.28       |
| Quadricyclane                                                       | 30.01             | 25.75             | 4.26       |
| Diethylammonium hydrogen sulfate                                    | 33.89             | 38.15             | -4.26      |
| Tetra-1-dodecoxysilane                                              | 233.40            | 237.66            | -4.26      |
| 1-Benzyl-3-methylimidazolium 2-acryloamido-2-methylpropanesulfonate | 103.89            | 99.64             | 4.25       |
| Benzoylacetone                                                      | 50.05             | 45.82             | 4.23       |
| trans,trans-2,4-Hexadienoyl chloride                                | 39.26             | 35.08             | 4.18       |
| trans,trans-2,4-Heptadienal                                         | 38.87             | 34.70             | 4.17       |
| Ethyl 3-methyl-3-phenylglycidate                                    | 59.88             | 55.74             | 4.14       |
| 9-H-Perfluorononyl 2-ethylhexanoate                                 | 90.16             | 86.05             | 4.11       |
| 1-(2-Cyanoethyl)-3-hexylimidazolium bis(2-ethylhexyl)sulfosuccinate | 163.70            | 167.80            | -4.10      |
| Benzo[b]fluorene                                                    | 76.21             | 72.11             | 4.10       |
| 1-Octyl-3-methylimidazolium thiocyanate                             | 80.61             | 76.60             | 4.01       |
| trans-Azobenzene                                                    | 63.27             | 59.26             | 4.01       |
| Fluoranthene                                                        | 71.49             | 67.48             | 4.01       |

|                                                           |        |        |       |
|-----------------------------------------------------------|--------|--------|-------|
| Vinylphenylphosphinic chloride                            | 42.95  | 46.91  | -3.96 |
| 1-Chloro-1,1-difluoroethane                               | 20.31  | 16.36  | 3.95  |
| 1-Propyl-3-methylimidazolium methylsulfate                | 50.18  | 53.98  | -3.80 |
| Methyl ethylxanthate                                      | 34.82  | 38.54  | -3.72 |
| N,N-Dimethylaminotrimethylsilane                          | 41.59  | 37.89  | 3.70  |
| N-Hexylpyridinium trifluoroacetate                        | 60.96  | 64.61  | -3.65 |
| 3,3'-Dimethylazobenzene                                   | 72.51  | 68.88  | 3.63  |
| Salicylic acid                                            | 31.18  | 34.80  | -3.62 |
| trans,trans-2,4-Hexadienal                                | 33.64  | 30.07  | 3.57  |
| 2-Bromocyclohexanone                                      | 39.40  | 35.86  | 3.54  |
| 1-Phenyl-2-hexyl-3,5-dimethylpyrazolium tetrafluoroborate | 85.60  | 82.07  | 3.53  |
| Dipivaloylmethane                                         | 57.04  | 53.59  | 3.45  |
| 6,6,7,7,8,8,8-Heptafluoro-2,2-dimethyl-3,5-octanedione    | 53.47  | 50.03  | 3.44  |
| N-Ethyl-N,N-dimethylammonium phenylacetate                | 58.89  | 62.20  | -3.31 |
| 5-(Hydroxymethyl)-2-furaldehyde                           | 33.94  | 30.63  | 3.31  |
| Diethylammonium acetate                                   | 33.75  | 37.05  | -3.30 |
| Butyric aldehyde diethylacetal                            | 45.68  | 42.39  | 3.29  |
| Methylsuccinic acid                                       | 25.19  | 28.48  | -3.29 |
| Cinnamaldehyde                                            | 44.20  | 40.92  | 3.28  |
| Tris(3-hydroxypropyl)phosphine                            | 55.31  | 58.58  | -3.27 |
| Schradan                                                  | 72.20  | 68.93  | 3.27  |
| 2,2'-Dimethylazobenzene                                   | 72.12  | 68.88  | 3.24  |
| 3-Ethylbenzoic acid                                       | 45.64  | 42.40  | 3.24  |
| O,O,O-Triethyl thiophosphate                              | 38.82  | 35.60  | 3.22  |
| 1-Nitro-2-phenoxybenzene                                  | 56.72  | 59.88  | -3.16 |
| 3,4,5,6-Tetrahydro-7-methoxy-2H-azepine                   | 39.49  | 36.35  | 3.14  |
| 2-Hydroxyethylammonium oleate                             | 106.05 | 102.91 | 3.14  |
| 4-Nitrothioanisole                                        | 49.20  | 46.10  | 3.10  |
| Ethyl fumarate                                            | 36.18  | 33.11  | 3.07  |
| Benzylideneacetone                                        | 48.43  | 45.36  | 3.07  |
| 3-Methylbenzoyl chloride                                  | 44.67  | 41.64  | 3.03  |
| 2,2-Diethyl-1,3-propanediol                               | 34.32  | 37.34  | -3.02 |
| Tri(1-phenylethoxy)borine                                 | 109.47 | 112.49 | -3.02 |
| Tetramethyldiaminobutane                                  | 49.95  | 47.00  | 2.95  |
| 1-Ethylthio-5,5-bis(ethoxy)-pent-1-en-3-yne               | 64.96  | 62.01  | 2.95  |
| O,O-diisobutyl isobutylthiophosphinate                    | 73.14  | 76.08  | -2.94 |
| (3-Bromo-1-propenyl)benzene                               | 51.09  | 48.18  | 2.91  |
| Octafluorobutyl-1,4-diisocyanate                          | 38.69  | 35.80  | 2.89  |
| Isopropyl phosphorusoxy dichloride                        | 37.20  | 34.31  | 2.89  |
| 1,2-Dibromo-1,2-dichloroethane                            | 39.24  | 36.36  | 2.88  |
| Chloromethylsulfenyl chloride                             | 23.73  | 26.61  | -2.88 |
| N'-Ethyl-N,N-dimethyl-1,2-ethanediamine                   | 40.03  | 37.18  | 2.85  |
| N-Isobutyl-3-sulfobutan-1-aminium hydrogen sulfate        | 64.42  | 67.27  | -2.85 |
| Phenylpropargyl aldehyde                                  | 42.36  | 39.52  | 2.84  |
| Diethyl benzylidenemalonate                               | 69.94  | 67.11  | 2.83  |
| Pentafluorobenzenethiol                                   | 36.83  | 34.02  | 2.81  |
| Oxotremorine                                              | 62.31  | 59.51  | 2.80  |
| 2-Methoxybenzylalcohol                                    | 42.09  | 39.30  | 2.79  |
| 3-(2-Cyanoethyl)-1-hexylimidazolium 3-sulfobenzoate       | 100.01 | 102.80 | -2.79 |
| 4-t-Butylbenzoyl chloride                                 | 58.27  | 55.50  | 2.77  |
| 4-Phenyl-3-butyne-2-one                                   | 46.72  | 43.96  | 2.76  |
| 2-t-Butyl-5-methylphenol                                  | 54.59  | 51.84  | 2.75  |
| Phenazine                                                 | 59.11  | 56.36  | 2.75  |
| 4-Butylbenzoyl chloride                                   | 58.27  | 55.53  | 2.74  |
| Ethyl 3-phenylpropionate                                  | 52.76  | 50.03  | 2.73  |
| Cinnamionitrile                                           | 42.96  | 40.24  | 2.72  |
| trans-Geranyl bromide                                     | 58.65  | 55.95  | 2.70  |
| 1,2-Bis(triethylsilyl)acetylene                           | 79.93  | 82.62  | -2.69 |
| 1-Butylthio-5,5-bis(ethoxy)-pent-1-en-3-yne               | 73.95  | 71.27  | 2.68  |
| Cinnamic acid ethylester                                  | 54.30  | 51.62  | 2.68  |
| Hydroxyacetaldehyde diethylacetal                         | 37.22  | 34.55  | 2.67  |
| Diethyl vinylphosphonate                                  | 39.62  | 42.28  | -2.66 |
| Hexamethylbenzene                                         | 52.72  | 55.38  | -2.66 |
| 4-Pentylbenzoyl chloride                                  | 62.82  | 60.16  | 2.66  |
| s-trans-Butadiene                                         | 22.69  | 20.04  | 2.65  |
| 2-Phenoxyvinyl diethoxy phosphorus oxide                  | 71.10  | 68.45  | 2.65  |
| 1-Chloroanthracene                                        | 69.90  | 67.26  | 2.64  |
| 2,3-Dihydro-4H-1-benzopyran-4-one                         | 43.36  | 40.72  | 2.64  |
| 2,6-Diethylaniline                                        | 52.09  | 49.45  | 2.64  |
| 1-Benzyl-3-(2-cyanoethyl)imidazolium thiocyanate          | 75.18  | 77.79  | -2.61 |
| Ethyl 2,4-dioxopentanoate                                 | 39.47  | 36.87  | 2.60  |
| N-Ethylcarbazole                                          | 66.38  | 63.78  | 2.60  |
| Methyl phenylpropionate                                   | 47.95  | 45.37  | 2.58  |
| 1,2-Dibromo-1,1-dichloroethane                            | 39.24  | 36.67  | 2.57  |
| 2-Methoxyphenylisothiocyanate                             | 50.47  | 47.90  | 2.57  |
| 1,1-Difluoroethane                                        | 13.83  | 11.28  | 2.55  |
| Dicyclohexylphosphine                                     | 66.28  | 63.75  | 2.53  |

|                                                                            |        |        |       |
|----------------------------------------------------------------------------|--------|--------|-------|
| 2-Methyl-3-phenyl-2-propenal                                               | 48.13  | 45.60  | 2.53  |
| 1,2,4-Triazole                                                             | 17.50  | 14.98  | 2.52  |
| Phenyl butoxy 2-(butoxycarbonyl)ethyl phosphorus oxide                     | 86.28  | 88.79  | -2.51 |
| Cannabidiol                                                                | 94.93  | 97.43  | -2.50 |
| Benz[a]anthracene                                                          | 82.90  | 80.40  | 2.50  |
| Tris(2-ethylhexyl) trimellitate                                            | 159.67 | 157.17 | 2.50  |
| Vitamin K1                                                                 | 143.28 | 140.79 | 2.49  |
| Cyclobutylol                                                               | 51.72  | 49.23  | 2.49  |
| Maleic anhydride                                                           | 17.72  | 20.20  | -2.48 |
| Bis(2-hydroxyethyl)ammonium oleate                                         | 115.82 | 113.36 | 2.46  |
| 4-Tolunitrile                                                              | 33.50  | 35.95  | -2.45 |
| Bis(diethylamino)bis(dipropylamino)silane                                  | 113.74 | 116.19 | -2.45 |
| 7-H-Perfluoroheptyl methyl ether                                           | 46.04  | 43.61  | 2.43  |
| 4-nitrodiphenyl ether                                                      | 62.31  | 59.88  | 2.43  |
| 1,3-Dioxolan-2-one                                                         | 19.31  | 21.73  | -2.42 |
| Acetic acid 2-hydroxyethylester                                            | 26.22  | 23.80  | 2.42  |
| trans-1,3,5-Hexatriene                                                     | 31.55  | 29.14  | 2.41  |
| Bis(trifluoroacetyl)methane                                                | 28.84  | 26.43  | 2.41  |
| Triphenylphosphane                                                         | 87.45  | 85.04  | 2.41  |
| 2-Methyl-5-isopropylaniline                                                | 47.00  | 49.40  | -2.40 |
| 4-(1-Bromoethyl)-benzonitrile                                              | 50.76  | 48.36  | 2.40  |
| 1-Ethyl-3-methylimidazolium 2-acryloamido-2-methylpropanesulfonate         | 77.32  | 79.69  | -2.37 |
| Tri(butyl) ethylphosphonium diethylphosphate                               | 105.37 | 107.73 | -2.36 |
| beta-Bromocinnamaldehyde                                                   | 50.67  | 48.31  | 2.36  |
| 9H-Fluoren-9-one                                                           | 56.81  | 54.45  | 2.36  |
| Tetra-1-heptoxysilane                                                      | 142.72 | 145.06 | -2.34 |
| Spiro(2,2)pentane                                                          | 23.33  | 21.00  | 2.33  |
| 1-(2-Hydroxyethyl)-3-methylimidazolium bis(trifluoromethanesulfonyl) amide | 69.54  | 67.23  | 2.31  |
| 1,3,5-Tri-t-butylbenzene                                                   | 80.22  | 82.53  | -2.31 |
| Phenyl butoxy 2-(butoxycarbonyl)propyl phosphorus oxide                    | 91.07  | 93.37  | -2.30 |
| Diethyl oxobutanedioate                                                    | 45.24  | 42.94  | 2.30  |
| 1,4-Diiodobenzene                                                          | 49.38  | 51.68  | -2.30 |
| Phenyltrichlorosilylacetylene                                              | 58.54  | 56.24  | 2.30  |
| Antimalarine                                                               | 91.20  | 88.90  | 2.30  |
| 6-t-Butyl-2,4-dimethylphenol                                               | 58.94  | 56.65  | 2.29  |
| 4-Aminophenylacetate                                                       | 44.17  | 41.88  | 2.29  |
| Tetra(1H,1H,7H-perfluoroheptyl)silicate                                    | 149.98 | 152.26 | -2.28 |
| Trihexyl tetradecyl phosphonium acetate                                    | 173.57 | 171.29 | 2.28  |
| Coronene                                                                   | 110.04 | 107.76 | 2.28  |
| Potasan                                                                    | 85.31  | 83.05  | 2.26  |
| (2-Methoxyvinyl)benzene                                                    | 43.98  | 41.72  | 2.26  |
| Hexadecanoic anhydride                                                     | 154.37 | 152.12 | 2.25  |
| 1-(2-Hydroxyethyl)-3-methylimidazolium perfluorobutanesulfonate            | 63.29  | 65.53  | -2.24 |
| Chloropentafluorobenzene                                                   | 33.07  | 30.84  | 2.23  |
| Phenylisothiocyanate                                                       | 43.58  | 41.35  | 2.23  |
| 2-Methylpropane                                                            | 22.80  | 20.59  | 2.21  |
| 9-Methylanthracene                                                         | 69.46  | 67.25  | 2.21  |
| 4-t-Butylbenzenemethanol                                                   | 53.62  | 51.42  | 2.20  |
| Bis-N-(2-hydroxypropyl)-2-furfurylamine                                    | 56.20  | 58.40  | -2.20 |
| Ethyl 2-benzylidene-2-cyanoacetate                                         | 53.73  | 55.92  | -2.19 |
| Methyl sorbate                                                             | 38.11  | 35.92  | 2.19  |
| N,N-Diisopropylethanolamine                                                | 46.50  | 44.32  | 2.18  |
| Acetaldol                                                                  | 20.37  | 22.55  | -2.18 |
| 1,3-Butadien-1-ol acetate                                                  | 33.04  | 30.86  | 2.18  |
| 2-(Bromomethoxy)propane                                                    | 29.09  | 31.27  | -2.18 |
| Bis(trihexyl)siloxane                                                      | 189.57 | 187.40 | 2.17  |
| 9-Methyl-9H-fluorene                                                       | 60.89  | 58.73  | 2.16  |
| 9-H-Perfluorononyl butyrate                                                | 69.74  | 67.58  | 2.16  |
| 5-Methoxy-2-methylindole                                                   | 51.61  | 49.45  | 2.16  |
| 2-Butylthiovinyl dihexoxy phosphorus oxide                                 | 103.28 | 105.43 | -2.15 |
| 1-Phenyl-2-pentyl-3,5-dimethylpyrazolium tetrafluoroborate                 | 79.59  | 77.44  | 2.15  |
| n-Undecanal                                                                | 55.68  | 53.54  | 2.14  |
| 3-Acetyl-6-methylpyridine                                                  | 41.08  | 38.94  | 2.14  |
| 4-Cyclohexylcyclohexyl acrylate                                            | 70.80  | 68.67  | 2.13  |
| Hexachlorobenzene                                                          | 53.31  | 55.44  | -2.13 |
| 3-Cyclohexyl-2-methylnonane                                                | 71.81  | 73.93  | -2.12 |
| Triethyl-2-phenoxyethylsilane                                              | 72.79  | 74.91  | -2.12 |
| Ethyl sorbate                                                              | 42.69  | 40.58  | 2.11  |
| n-Butylstearate                                                            | 103.61 | 105.72 | -2.11 |
| Ethyl trichloromethyl ether                                                | 34.31  | 32.21  | 2.10  |
| Methyl 2-(methylamino)benzoate                                             | 48.76  | 46.66  | 2.10  |
| 4-t-Butyl-2,5-dimethylphenol                                               | 58.75  | 56.65  | 2.10  |
| Cinnamoylchloride                                                          | 48.03  | 45.93  | 2.10  |
| 1,4,5-Trimethyltetrahydro-8-naphthol                                       | 61.24  | 59.14  | 2.10  |
| 6-Nitro-9-oxaphenanthren-10-one                                            | 64.81  | 62.72  | 2.09  |

|                                             |        |        |       |
|---------------------------------------------|--------|--------|-------|
| Tri-o-cresylphosphate                       | 99.27  | 101.35 | -2.08 |
| 2-Bromo-1,4-dimethoxybenzene                | 49.29  | 47.21  | 2.08  |
| 2-Fluoroethylsulfonyl fluoride              | 23.02  | 20.95  | 2.07  |
| 2-Oxobutyric acid                           | 20.50  | 22.57  | -2.07 |
| 3-(Phenylmethylene)-2-pentanone             | 56.73  | 54.67  | 2.06  |
| 2,6-Dimethylhepta-2,5-dien-4-one            | 45.92  | 43.87  | 2.05  |
| 1,4-Di-t-butylbenzene                       | 61.81  | 63.86  | -2.05 |
| 2-Acetylcyclopentanone                      | 35.00  | 32.96  | 2.04  |
| Benzamide                                   | 32.44  | 34.47  | -2.03 |
| cis-Cyclohexane-1,2-dinitrite               | 42.04  | 40.02  | 2.02  |
| 4-Methoxyphenyldipropylphosphine            | 73.12  | 71.11  | 2.01  |
| S-Methyl thioacetate                        | 26.05  | 24.04  | 2.01  |
| Tri-sec-butoxymethane                       | 69.40  | 67.40  | 2.00  |
| 4-Vinylaniline                              | 41.71  | 39.71  | 2.00  |
| Dibenzofuran                                | 53.42  | 51.42  | 2.00  |
| 1-Aziridineethanol                          | 21.77  | 23.76  | -1.99 |
| Benzenecarbothioic acid                     | 37.13  | 39.11  | -1.98 |
| Monoacetin                                  | 27.89  | 29.85  | -1.96 |
| 2,6-Di-t-pentyl-4-methylphenol              | 77.81  | 79.77  | -1.96 |
| N-Benzyl-N-ethylaniline                     | 71.66  | 69.71  | 1.95  |
| 1-Bromo-4-t-butylbenzene                    | 54.73  | 52.78  | 1.95  |
| Methyl 3-bromopropanoate                    | 32.04  | 30.10  | 1.94  |
| Glycerol trioleate                          | 268.81 | 270.75 | -1.94 |
| Forstab                                     | 100.03 | 98.09  | 1.94  |
| Diphenylsulfone                             | 62.21  | 60.27  | 1.94  |
| 2,3-Dimethylquinoxaline                     | 47.17  | 49.10  | -1.93 |
| Pentafluorobenzonitrile                     | 32.57  | 30.64  | 1.93  |
| Isobutylphosphinic dichloride               | 37.98  | 39.91  | -1.93 |
| 1-Butyl-3-methylimidazolium L-alanine       | 63.81  | 61.89  | 1.92  |
| 2,4-Dichloroaniline                         | 38.29  | 40.21  | -1.92 |
| 9,9'-Bifluorenyl                            | 108.00 | 106.08 | 1.92  |
| 2-Fluorobenzeneacetoneitrile                | 37.59  | 35.67  | 1.92  |
| N-Pentylpyridinium trifluoroacetate         | 58.06  | 59.98  | -1.92 |
| 2-Phenoxyvinyl dimethoxy phosphorus oxide   | 61.05  | 59.13  | 1.92  |
| Cinoxate                                    | 70.86  | 68.95  | 1.91  |
| Cyclopropane                                | 15.79  | 13.89  | 1.90  |
| 2-(Phenylmethylene)butanal                  | 52.12  | 50.23  | 1.89  |
| 2-Fluorophenol                              | 30.15  | 28.26  | 1.89  |
| Bromoacetylene                              | 18.64  | 16.76  | 1.88  |
| 1,4-Butanediamine                           | 29.41  | 27.54  | 1.87  |
| 1-Cyano-1,3-butadiene                       | 26.49  | 24.62  | 1.87  |
| Dichloroethylmethylsilane                   | 36.02  | 34.16  | 1.86  |
| 4-Hydroxybenzaldehyde                       | 35.52  | 33.66  | 1.86  |
| N-Methylmorpholinium formate                | 35.24  | 37.10  | -1.86 |
| EPN                                         | 86.83  | 84.97  | 1.86  |
| Tartaric acid                               | 24.89  | 26.74  | -1.85 |
| 1,2-Diiodotetrafluoroethane                 | 38.87  | 37.02  | 1.85  |
| 1-Butoxy-5,5-bis(ethoxy)-pent-1-en-3-yne    | 66.99  | 65.14  | 1.85  |
| Tri-m-cresylphosphate                       | 103.19 | 101.35 | 1.84  |
| Perfluoroisoprene                           | 25.97  | 24.13  | 1.84  |
| 1,3-Benzodioxole-5-ethanamine               | 43.73  | 45.56  | -1.83 |
| 1,2-Dinitrobenzene                          | 41.74  | 39.92  | 1.82  |
| Perfluoro-n-octane                          | 43.81  | 42.00  | 1.81  |
| Tetradecoxysilane                           | 198.82 | 200.62 | -1.80 |
| Benzylaniline                               | 61.84  | 60.04  | 1.80  |
| 2-Isopropoxyvinyl diethoxy phosphorus oxide | 59.43  | 57.63  | 1.80  |
| cis-3-Phenyl-2-propenenitrile               | 42.03  | 40.24  | 1.79  |
| Ethylcarbamate                              | 22.59  | 20.81  | 1.78  |
| N,N-Dimethyl-2-naphthylamine                | 60.34  | 58.56  | 1.78  |
| 1,3-Diphenyl-2-buten-1-one                  | 71.77  | 69.99  | 1.78  |
| Acetylacetone                               | 27.65  | 25.87  | 1.78  |
| Isobutylene                                 | 22.16  | 20.39  | 1.77  |
| 4,4'-Dibromodiphenyl ether                  | 70.13  | 68.36  | 1.77  |
| Bolecic acid                                | 85.44  | 83.67  | 1.77  |
| s-cis-Butadiene                             | 21.80  | 20.04  | 1.76  |
| s-trans-1,3-Butadiene                       | 21.80  | 20.04  | 1.76  |
| Hexyl ethoxy dithiophosphinic acid          | 63.48  | 65.23  | -1.75 |
| Ethyl 2-bromovalerate                       | 45.80  | 44.05  | 1.75  |
| 2-Ethoxycarbonylaniline                     | 48.13  | 46.38  | 1.75  |
| trans-1,3-Butadienylbenzene                 | 46.50  | 44.76  | 1.74  |
| N,N-Diethyldodecanamide                     | 81.75  | 80.01  | 1.74  |
| 9-Chloroanthracene                          | 69.00  | 67.26  | 1.74  |
| 2-Vinyl-5-norbornene                        | 40.67  | 38.94  | 1.73  |
| 3,4,5-Trimethoxybenzyl alcohol              | 50.67  | 52.40  | -1.73 |
| 2-Ethoxyvinyl dimethoxy phosphorus oxide    | 45.41  | 43.68  | 1.73  |
| 4-Methoxybenzaldehyde                       | 40.09  | 38.37  | 1.72  |
| Ethoxyquin                                  | 69.39  | 67.68  | 1.71  |

|                                                                       |        |        |       |
|-----------------------------------------------------------------------|--------|--------|-------|
| 4-Nitroaniline                                                        | 35.57  | 37.27  | -1.70 |
| 2-Phenylvinyl bis(dimethylamino) phosphorus oxide                     | 71.90  | 70.20  | 1.70  |
| Divinylacetylene                                                      | 29.44  | 27.74  | 1.70  |
| Nitroethylene                                                         | 15.40  | 17.10  | -1.70 |
| 9,10-Dihydrophenanthrene                                              | 60.48  | 58.78  | 1.70  |
| N-(2-Hydroxyethyl)-bis(2-furfuryl)amine                               | 58.60  | 60.30  | -1.70 |
| Tri(1,2-bis(ethoxycarbonyl)ethoxy)borine                              | 130.83 | 132.53 | -1.70 |
| Dicyclohexylketone                                                    | 56.58  | 58.27  | -1.69 |
| 2,4,6-Cycloheptatrien-1-one                                           | 33.92  | 32.23  | 1.69  |
| Tributylsilylaminotriethylsilane                                      | 104.73 | 106.42 | -1.69 |
| Dimethyldi(2-ethylhexoxy)silane                                       | 94.80  | 96.49  | -1.69 |
| 4-Fluoroaniline                                                       | 28.79  | 30.47  | -1.68 |
| 1,2,3,5-Tetrafluorobenzene                                            | 27.80  | 26.12  | 1.68  |
| Triphenylethylene                                                     | 86.69  | 85.01  | 1.68  |
| Hexanamide                                                            | 34.71  | 33.04  | 1.67  |
| 2-Ethoxyvinyl diethoxy phosphorus oxide                               | 54.67  | 53.00  | 1.67  |
| Sulfuric acid                                                         | 13.51  | 15.17  | -1.66 |
| sec-Butylstyrene                                                      | 55.97  | 54.31  | 1.66  |
| (-)-Globulol                                                          | 67.93  | 66.28  | 1.65  |
| Tetracyanoethylene                                                    | 30.73  | 29.08  | 1.65  |
| Stearic acid anhydride                                                | 172.28 | 170.64 | 1.64  |
| N-Propylpyridinium trifluoroacetate                                   | 52.36  | 50.72  | 1.64  |
| p-Anisylchloride                                                      | 45.02  | 43.38  | 1.64  |
| 1-Methoxy-1,3-butadiene                                               | 27.74  | 26.10  | 1.64  |
| 2-Isopropoxyvinyl bis(diethylamino) phosphorus oxide                  | 77.53  | 79.15  | -1.62 |
| Anethole                                                              | 48.60  | 46.98  | 1.62  |
| Saccharose                                                            | 67.70  | 69.32  | -1.62 |
| Sanger's Reagent                                                      | 41.43  | 39.82  | 1.61  |
| Octafluoroanisole                                                     | 33.75  | 32.14  | 1.61  |
| Dimethyldi-2-heptoxysilane                                            | 85.72  | 87.33  | -1.61 |
| 1-(2-Phenylethoxy)-5,5-bis(ethoxy)-pent-1-en-3-yne                    | 82.06  | 80.46  | 1.60  |
| 1,2,3,4,5,6,7,8-Octahydrophenanthrene                                 | 58.44  | 60.04  | -1.60 |
| beta-Ionone                                                           | 61.84  | 60.24  | 1.60  |
| N-(2-Hydroxypropyl)-bis(2-furfuryl)amine                              | 63.34  | 64.93  | -1.59 |
| iso-Pentyl 4-methylpentoxy dithiophosphinic acid                      | 80.61  | 79.02  | 1.59  |
| 2-Nitrobenzeneethanol                                                 | 45.67  | 44.08  | 1.59  |
| Triethylene glycol dimethacrylate                                     | 71.75  | 73.34  | -1.59 |
| Propyldichlorophosphine                                               | 33.74  | 35.33  | -1.59 |
| 6,6-Dimethylfulvene                                                   | 38.24  | 36.66  | 1.58  |
| 4-t-Amylstyrene                                                       | 60.53  | 58.96  | 1.57  |
| trans-(3-Chloro-1-propenyl)benzene                                    | 46.82  | 45.25  | 1.57  |
| Tripropylsilanol                                                      | 55.59  | 54.03  | 1.56  |
| N,N-Dimethyl-2-nitroaniline                                           | 48.86  | 47.30  | 1.56  |
| 1,3-Divinylbenzene                                                    | 46.36  | 44.80  | 1.56  |
| Propyne                                                               | 15.51  | 13.96  | 1.55  |
| Quinine                                                               | 93.86  | 95.40  | -1.54 |
| 2-Acetylcyclohexanone                                                 | 39.13  | 37.59  | 1.54  |
| N,N-Diethyl-2-methylaniline                                           | 53.04  | 54.57  | -1.53 |
| Ethyl 4,4,4-trifluoroacetoacetate                                     | 33.75  | 32.22  | 1.53  |
| Bis(trifluoroacetyl)methane (enol form)                               | 28.84  | 27.31  | 1.53  |
| Diheptyl terephthalate                                                | 105.99 | 104.46 | 1.53  |
| trans-2-Butenedinitrile                                               | 21.63  | 20.10  | 1.53  |
| 2-Phenoxypropionic acid                                               | 42.47  | 43.99  | -1.52 |
| Benzenesulfinylchloride                                               | 39.52  | 41.04  | -1.52 |
| (Ethoxy fluoro oxophosphorus) (bis(diethylamino) oxophosphorus) oxide | 74.30  | 72.78  | 1.52  |
| 4-(4-Bromophenoxy)toluene                                             | 67.10  | 65.58  | 1.52  |
| 1-Methoxy-4-trifluoromethoxy-2,3,5,6-tetrafluorobenzene               | 40.30  | 38.79  | 1.51  |
| Acetylisothiocyanate                                                  | 26.81  | 25.30  | 1.51  |
| 2-Methyl-7,8-benzoquinoline                                           | 63.25  | 64.75  | -1.50 |
| 2,5-Norbornadiene                                                     | 28.37  | 29.87  | -1.50 |
| 2-Nitro-m-xylene                                                      | 41.34  | 42.84  | -1.50 |
| 1-Pent-4-enylphosphine                                                | 33.47  | 34.97  | -1.50 |
| 1,2-Dimethyl-4-nitrobenzene                                           | 41.34  | 42.84  | -1.50 |
| 2-Isopropoxyvinyl dimethoxy phosphorus oxide                          | 49.81  | 48.31  | 1.50  |
| 3,5-Diethoxy-5-methylhexanal                                          | 49.07  | 47.57  | 1.50  |
| trans,cis-2,4-Hexadiene                                               | 31.08  | 29.58  | 1.50  |
| Glycerol trinitrate                                                   | 40.39  | 38.90  | 1.49  |
| N-(2-Furfuryl)thiomorpholine                                          | 50.61  | 52.10  | -1.49 |
| 1-Ethyl-5-methylpyrazole                                              | 31.53  | 33.02  | -1.49 |
| Ethyl cyclohexanecarboxylate                                          | 44.85  | 43.36  | 1.49  |
| 2-Isobutenylfuran                                                     | 39.06  | 37.57  | 1.49  |
| 1-Fluoro-3-isothiocyanatobenzene                                      | 42.29  | 40.80  | 1.49  |
| Ethoxyacetylene                                                       | 22.08  | 20.59  | 1.49  |
| 2,N,N-Trimethylaniline                                                | 43.92  | 45.41  | -1.49 |
| 2,N,N-Trimethylaniline                                                | 43.92  | 45.41  | -1.49 |
| N-Hexylpyridinium bis(trifluoromethanesulfonyl) amide                 | 84.06  | 85.55  | -1.49 |

|                                                            |        |        |       |
|------------------------------------------------------------|--------|--------|-------|
| 1-Benzyl-3-methylimidazolium chloride                      | 58.45  | 59.94  | -1.49 |
| L-Proline 2-methylpropyl ester dodecyl sulfate             | 116.75 | 115.26 | 1.49  |
| Chloromethyldiphenylsilane                                 | 68.14  | 69.62  | -1.48 |
| L-Valine 2-methylpropyl ester dodecyl sulfate              | 118.59 | 117.11 | 1.48  |
| Propyl 4-hydroxybenzoate                                   | 50.28  | 48.80  | 1.48  |
| Benzylazide                                                | 38.58  | 40.06  | -1.48 |
| cis-Stilbene                                               | 61.86  | 60.38  | 1.48  |
| 1-Methoxy-1-buten-3-yne                                    | 25.83  | 24.35  | 1.48  |
| 1,1,2,2-Tetrafluoroethoxycyclohexane                       | 40.68  | 39.20  | 1.48  |
| Cyclooctanamine                                            | 38.98  | 40.45  | -1.47 |
| alpha-Farnesene                                            | 69.47  | 70.94  | -1.47 |
| 1,3-Dihydroxybenzene                                       | 28.74  | 30.20  | -1.46 |
| 1-(1-Methyl-1H-pyrrol-2-yl)ethanone                        | 37.01  | 35.55  | 1.46  |
| 4-Acetylphenol                                             | 39.56  | 38.10  | 1.46  |
| 1-Benzyl-3-methylimidazolium methylsulfate                 | 67.84  | 69.30  | -1.46 |
| Methyltripropoxysilane                                     | 61.92  | 60.47  | 1.45  |
| 1,2-Divinylbenzene                                         | 46.25  | 44.80  | 1.45  |
| 2-Phenyl-2-propanol                                        | 43.39  | 41.94  | 1.45  |
| 4-Bromoaniline                                             | 36.71  | 38.16  | -1.45 |
| Bis(dimethylamino)borane                                   | 31.63  | 33.07  | -1.44 |
| 4-Methyl-1,3-pentadiene                                    | 30.93  | 29.49  | 1.44  |
| 1-Vinyl-4-methoxybenzene                                   | 43.65  | 42.21  | 1.44  |
| 1-Vinyl-3-methoxybenzene                                   | 43.65  | 42.21  | 1.44  |
| Coumatetralyl                                              | 84.30  | 82.86  | 1.44  |
| Butyl oleate                                               | 104.13 | 105.56 | -1.43 |
| Bromomethylacetate                                         | 25.24  | 26.67  | -1.43 |
| 1-Allyl-3-(2-cyanoethyl)imidazolium thiocyanate            | 60.96  | 62.39  | -1.43 |
| Methyl trioctylammonium bis(trifluoromethylsulfonyl)amide  | 154.51 | 153.08 | 1.43  |
| Isoheptyl methoxy dithiophosphinic acid                    | 63.84  | 65.26  | -1.42 |
| 4,4-Diethoxy-1-butanamine                                  | 44.42  | 45.84  | -1.42 |
| trans-Piperylene                                           | 26.23  | 24.81  | 1.42  |
| 2,3'-Bipyridine                                            | 48.27  | 46.85  | 1.42  |
| trans-2-Methoxy-4-(1-propenyl)phenol                       | 50.24  | 48.82  | 1.42  |
| Dichloroacetylene                                          | 19.36  | 20.78  | -1.42 |
| Methyl 2-aminobenzoate                                     | 43.13  | 41.72  | 1.41  |
| 2-(1-Pentenyl)furan                                        | 43.70  | 42.29  | 1.41  |
| Cumulene                                                   | 17.25  | 15.84  | 1.41  |
| 1-Butyne                                                   | 20.00  | 18.59  | 1.41  |
| Methylparathion                                            | 60.50  | 61.91  | -1.41 |
| 9-Bromoanthracene                                          | 71.44  | 70.03  | 1.41  |
| Octadecanenitrile                                          | 83.86  | 85.27  | -1.41 |
| 1,5-Dimethylpyrazole                                       | 27.04  | 28.44  | -1.40 |
| N-Methyl-p-toluidine                                       | 41.72  | 40.32  | 1.40  |
| Tritetralin                                                | 75.40  | 76.80  | -1.40 |
| Phenylphosphonic dichloride                                | 45.88  | 44.49  | 1.39  |
| Tetrabutylphosphonium butyrate                             | 105.08 | 106.47 | -1.39 |
| 2-Hydroxypropylmethacrylate                                | 36.05  | 37.44  | -1.39 |
| Isosafrol                                                  | 47.97  | 46.58  | 1.39  |
| 1-Hexadecanol                                              | 76.24  | 77.62  | -1.38 |
| 3-Chloronitrobenzene                                       | 36.66  | 38.04  | -1.38 |
| 1,2-Diphenylethane                                         | 59.16  | 60.54  | -1.38 |
| Biphenyl                                                   | 49.90  | 51.28  | -1.38 |
| 1,2-Diiodoethane                                           | 38.54  | 37.16  | 1.38  |
| Diethylmethyl 1-isobutoxyethoxysilane                      | 66.14  | 64.76  | 1.38  |
| Diethyleneglycol dimethacrylate                            | 60.99  | 62.37  | -1.38 |
| 1,2-Dimethoxy-4-(1-propenyl)benzene                        | 54.91  | 53.53  | 1.38  |
| 1-(Chloromethyl)-4-methoxybenzene                          | 41.33  | 42.70  | -1.37 |
| Panthenol                                                  | 50.05  | 51.42  | -1.37 |
| 1,10-Dibromodecane                                         | 65.29  | 63.92  | 1.37  |
| N,N-Diethylcarbamic acid                                   | 32.00  | 30.63  | 1.37  |
| Julolidine                                                 | 56.51  | 55.14  | 1.37  |
| Methyldichloroisobutoxysilane                              | 43.20  | 44.57  | -1.37 |
| Diphenylsulfoxide                                          | 61.40  | 60.04  | 1.36  |
| Diethyl acetylenedicarboxylate                             | 42.44  | 41.08  | 1.36  |
| Dimethyl pimelate                                          | 45.85  | 47.21  | -1.36 |
| Quinoxaline                                                | 40.50  | 39.14  | 1.36  |
| 4-Methoxy-1,1'-biphenyl                                    | 59.18  | 57.83  | 1.35  |
| 1-n-Propylimidazole                                        | 31.28  | 32.63  | -1.35 |
| 2-Phenylfuran                                              | 45.05  | 43.70  | 1.35  |
| Tridecanoic acid                                           | 65.28  | 63.94  | 1.34  |
| 1-(2-Hydroxyethyl)-3-(2-cyanoethyl)imidazolium thiocyanate | 60.35  | 59.01  | 1.34  |
| 1-Chloro-2-methyl-1-butene                                 | 28.50  | 29.84  | -1.34 |
| 5-Methylfurfural                                           | 30.55  | 29.21  | 1.34  |
| 4-Methylpentyl ethoxy dithiophosphinic acid                | 63.85  | 65.18  | -1.33 |
| 2-(Vinylloxy)ethanol                                       | 24.41  | 23.08  | 1.33  |
| 2-Iodobiphenyl                                             | 65.19  | 63.86  | 1.33  |
| trans-1-Propenylbenzene                                    | 41.76  | 40.43  | 1.33  |

|                                                                     |        |               |       |
|---------------------------------------------------------------------|--------|---------------|-------|
| 2,3,4,5-Tetramethylpyrrole                                          | 41.21  | 39.88         | 1.33  |
| Tetra(2,2-diethylhydrazino)silane                                   | 114.23 | 112.91        | 1.32  |
| sec-Hexyl acetate                                                   | 39.53  | 40.85         | -1.32 |
| cis-1,3,5-Hexatriene                                                | 30.46  | 29.14         | 1.32  |
| Isopropenylacetylene                                                | 24.29  | 22.97         | 1.32  |
| Dichloro(4-ethylphenyl)phosphine                                    | 56.02  | 54.70         | 1.32  |
| Phenethyl acetate                                                   | 45.65  | 46.96         | -1.31 |
| Ethylphenylsilanol                                                  | 47.88  | 46.57         | 1.31  |
| 3-Methyl-1,3-butanediol                                             | 29.35  | 28.04         | 1.31  |
| beta-Irone                                                          | 66.08  | 64.77         | 1.31  |
| Isoindole                                                           | 38.60  | 37.29         | 1.31  |
| 1-Ethyl-3-methylimidazolium hydrogen sulfate                        | 44.57  | 45.88         | -1.31 |
| 1,2-Dichloro-1-ethoxyethane                                         | 33.38  | 32.08         | 1.30  |
| 1,6-Hexanedial                                                      | 29.70  | 31.00         | -1.30 |
| 2-Ethylpyrrole                                                      | 31.77  | 30.47         | 1.30  |
| 1,3,5-Tris(3-methoxypropyl)borazine                                 | 83.61  | 84.90         | -1.29 |
| 3,5-Dichloroaniline                                                 | 41.50  | 40.21         | 1.29  |
| 3-Methylbutanoic anhydride                                          | 48.87  | 50.16         | -1.29 |
| Ethyl N,N-diethylamino phosphorusoxy fluoride                       | 41.53  | 40.24         | 1.29  |
| Acetoacetic acid ethylester Enolform                                | 34.11  | 32.82         | 1.29  |
| Phenothrin                                                          | 104.96 | 103.67        | 1.29  |
| 1-(2-Cyanoethyl)-3-octylimidazolium bis(2-ethylhexyl)sulfosuccinate | 175.77 | 177.06        | -1.29 |
| Tricyclene                                                          | 40.57  | 41.85         | -1.28 |
| Isobornyl thiocynoacetate                                           | 66.31  | 67.59         | -1.28 |
| p-Isopropenylstyrene                                                | 50.76  | 49.48         | 1.28  |
| 1,2-Dihydroxybenzene                                                | 31.48  | 30.2          | 1.28  |
| cis,cis-2,4-Hexadiene                                               | 30.86  | 29.58         | 1.28  |
| 1-Vinylnaphthalene                                                  | 52.40  | 53.68         | -1.28 |
| Butylisobutylether                                                  | 42.08  | 40.80         | 1.28  |
| Ethyl benzoylacetate                                                | 53.15  | 51.87         | 1.28  |
| 1,1-Dichlorotetrafluoroethane                                       | 22.58  | 21.30         | 1.28  |
| 5-Methyl-1-phenyl-1-hexen-3-one                                     | 60.48  | 59.20         | 1.28  |
| Glycerol tripalmitate                                               | 242.2  | 243.47        | -1.27 |
| Aramite                                                             | 87.62  | 86.35         | 1.27  |
| 1,1-Diphenyl-1-propene                                              | 63.79  | 65.06         | -1.27 |
| 2,5-Dimethyl-2,4-hexadiene                                          | 40.21  | 38.94         | 1.27  |
| 2-Phenylpyridine                                                    | 50.39  | 49.12         | 1.27  |
| 4-Methoxyacetophenone                                               | 44.02  | 42.75         | 1.27  |
| 1,1,1,2,2,3,3-Heptafluorobutane                                     | 22.95  | 21.68         | 1.27  |
| Furoylchloride                                                      | 30.50  | 29.23         | 1.27  |
| Naphthalene                                                         | 43.21  | 44.48         | -1.27 |
| 1,5-Cyclooctadiene                                                  | 35.45  | 36.72         | -1.27 |
| Tetra-2-ethyl-1-hexoxysilane                                        | 162.11 | 163.38        | -1.27 |
| Fluorosulfonylbenzene                                               | 35.05  | 36.31         | -1.26 |
| 9-Heptyl-9-heptadecanol                                             | 113.35 | 114.61        | -1.26 |
| N,N-Dimethyltrichloroacetamide                                      | 40.42  | 39.16         | 1.26  |
| cis-1,3-Hexadiene                                                   | 30.66  | 29.40         | 1.26  |
| N-Ethyl-3-methylaniline                                             | 46.16  | 44.90         | 1.26  |
| 4-Mercaptophenol                                                    | 35.10  | 36.36         | -1.26 |
| 1,2-Dichlorotetrafluoroethane                                       | 22.58  | 21.32         | 1.26  |
| Paraoxon                                                            | 64.85  | 63.60         | 1.25  |
| 2-Hydroxybenzoyl chloride                                           | 39.81  | 38.57         | 1.24  |
| Phenylhydrazine                                                     | 34.06  | not evaluable |       |
| Malathion                                                           | 77.17  | not evaluable |       |
| N-(Diethylaminothiocarbonyl)-N',N'-diethylbenzamidine               | 91.29  | not evaluable |       |
| 2-Pyrazoline                                                        | 19.51  | not evaluable |       |
| Chlorotrifluoroethylene                                             | 17.52  | not evaluable |       |
| 1-Butyl-3-methylimidazolium iodide                                  | 58.90  | not evaluable |       |
| 1-Hexyl-3-methylimidazolium iodide                                  | 67.74  | not evaluable |       |
