# Supplementary material
Source: MDPI journal article supplement (https://www.mdpi.com/2673-8015/2/4/20)
Supplement: s1 [file s1]

| <b>Molecule name</b>                   | <b>Polarizability<br/>exp</b> | <b>Polarizability<br/>calc</b> | <b>Deviation</b> | <b>Dev.<br/>in %</b> |
|----------------------------------------|-------------------------------|--------------------------------|------------------|----------------------|
| 2-Methylindole                         | 17.35                         | 16.85                          | 0.50             | 2.88                 |
| (Methoxymethyl)oxirane                 | 9.16                          | 8.67                           | 0.49             | 5.35                 |
| 1-Bromo-4-vinylbenzene                 | 17.62                         | 17.14                          | 0.48             | 2.72                 |
| cis-2-Methoxy-4-(1-propenyl)phenol     | 19.78                         | 19.30                          | 0.48             | 2.43                 |
| Isobutyl butyrate                      | 16.69                         | 16.21                          | 0.48             | 2.88                 |
| Isopropyl salicylate                   | 19.80                         | 19.32                          | 0.48             | 2.42                 |
| alpha-Ionone                           | 24.28                         | 23.81                          | 0.47             | 1.94                 |
| 3-Chlorocrotonic acid                  | 11.12                         | 10.65                          | 0.47             | 4.23                 |
| cis-2-Methyl-1,3-pentadiene            | 12.16                         | 11.69                          | 0.47             | 3.87                 |
| 1-Chloro-3-(1-methylethoxy)-2-propanol | 14.53                         | 15.00                          | -0.47            | -3.23                |
| 2-Formylnaphthalene                    | 20.21                         | 19.74                          | 0.47             | 2.33                 |
| Ethyl 4-methoxybenzoate                | 19.84                         | 19.37                          | 0.47             | 2.37                 |
| 2-Vinylfuran                           | 11.60                         | 11.13                          | 0.47             | 4.05                 |
| (trans-2-Bromovinyl)benzene            | 17.62                         | 17.16                          | 0.46             | 2.61                 |
| (3-Chloropropyl)benzene                | 17.53                         | 17.99                          | -0.46            | -2.62                |
| 4-Hydroxy-2-butanone                   | 9.32                          | 8.86                           | 0.46             | 4.94                 |
| Isobutyl salicylate                    | 21.60                         | 21.14                          | 0.46             | 2.13                 |
| Isopropyl trifluoroacetate             | 11.29                         | 10.83                          | 0.46             | 4.07                 |
| Diethyl ketomalonate                   | 15.65                         | 15.19                          | 0.46             | 2.94                 |
| Sorbic alcohol                         | 12.72                         | 12.26                          | 0.46             | 3.62                 |
| 2-Hydroxy-5-methylbenzaldehyde         | 15.69                         | 15.23                          | 0.46             | 2.93                 |
| Furfural                               | 10.08                         | 9.62                           | 0.46             | 4.56                 |
| Ethyl salicylate                       | 17.95                         | 17.49                          | 0.46             | 2.56                 |
