# Supplementary material
Source: MDPI journal article supplement (https://www.mdpi.com/2673-8015/2/4/20)
Supplement: s1 [file s1]

| Molecule name                                   | Refractivity<br>exp | Refractivity<br>calc | Deviation | Dev.<br>in % |
|-------------------------------------------------|---------------------|----------------------|-----------|--------------|
| (2-Phenylethyl)trichlorosilane                  | 58.62               | 58.57                | 0.05      | 0.09         |
| (3-Chloropropyl)trichlorosilane                 | 43.26               | 43.44                | -0.18     | -0.42        |
| (3-Chloropropyl)trimethoxysilane                | 46.53               | 46.62                | -0.09     | -0.19        |
| (3-Chloropropyl)trimethylsilane                 | 44.47               | 44.33                | 0.14      | 0.31         |
| (4-Bromophenoxy)trimethylsilane                 | 58.55               | 58.44                | 0.11      | 0.19         |
| (4-Chlorophenyl)trichlorosilane                 | 55.04               | 54.14                | 0.90      | 1.64         |
| (4-Methoxyphenyl)trimethylsilane                | 56.94               | 56.73                | 0.21      | 0.37         |
| (4-Methylphenyl)trimethylsilane                 | 54.82               | 55.02                | -0.20     | -0.36        |
| (Bromomethyl)chlorodimethylsilane               | 37.57               | 37.57                | 0.00      | 0.00         |
| (Bromomethyl)trimethylsilane                    | 38.09               | 38.08                | 0.01      | 0.03         |
| (Chloromethyl)trichlorosilane                   | 34.10               | 34.12                | -0.02     | -0.06        |
| (Chloromethyl)trimethylsilane                   | 35.13               | 35.01                | 0.12      | 0.34         |
| (Dichloromethyl)trichlorosilane                 | 39.36               | 39.06                | 0.30      | 0.76         |
| (Diethylamino)trimethylsilane                   | 47.33               | 47.09                | 0.24      | 0.51         |
| 1,1,1,3,5,5,5-Heptamethyltrisiloxane            | 63.17               | 63.24                | -0.07     | -0.11        |
| 1,1,1,3,5,7,7,7-Octamethyltetrasiloxane         | 77.46               | 77.53                | -0.07     | -0.09        |
| 1,1,3,3-Tetramethyl-1,3-diphenyldisiloxane      | 88.87               | 88.71                | 0.16      | 0.18         |
| 1,1,3,3-Tetramethyldisiloxane                   | 40.19               | 40.23                | -0.04     | -0.10        |
| 1,2-Bis(tributylsilyl)acetylene                 | 138.06              | 138.22               | -0.16     | -0.12        |
| 1,2-Bis(triethylsilyl)ethane                    | 85.59               | 85.82                | -0.23     | -0.27        |
| 1,2-Bis(trimethylsilyl)acetylene                | 55.18               | 55.24                | -0.06     | -0.11        |
| 1,2-Dis(trimethylsilyl)-ethylene                | 58.50               | 58.06                | 0.44      | 0.75         |
| 1,3,5-Trisilacyclohexane                        | 43.69               | 43.44                | 0.25      | 0.57         |
| 1,3-Bis(bromomethyl)tetramethyldisiloxane       | 64.41               | 64.45                | -0.04     | -0.06        |
| 1,3-Bis(chloromethyl)tetramethyldisiloxane      | 58.30               | 58.31                | -0.01     | -0.02        |
| 1,3-Bis(dichloromethyl)tetramethyldisiloxane    | 68.07               | 68.19                | -0.12     | -0.18        |
| 1,3-Bis(trimethylsiloxy)benzene                 | 75.39               | 75.18                | 0.21      | 0.28         |
| 1,3-Divinyl-1,1,3,3-tetramethyldisiloxane       | 57.23               | 57.33                | -0.10     | -0.17        |
| 1-Heptyltrifluorosilane                         | 41.32               | 41.07                | 0.25      | 0.61         |
| 2,2,4,4,6,6-Hexamethylcyclotrisilazane          | 63.90               | 63.78                | 0.12      | 0.19         |
| 2,4,6,8,10,12-Hexamethylcyclohexasiloxane       | 85.86               | 85.74                | 0.12      | 0.14         |
| 2,4,6,8-Tetramethylcyclotetrasiloxane           | 57.13               | 57.16                | -0.03     | -0.05        |
| 2,4,6-Trimethyl-2,4,6-triphenylcyclotrisiloxane | 115.86              | 115.59               | 0.27      | 0.23         |
| 2-Butylsilane                                   | 31.02               | 31.09                | -0.07     | -0.23        |
| 2-Pentyloxytrimethylsilane                      | 49.75               | 49.57                | 0.18      | 0.36         |
| 2-Silylpentasilane                              | 73.17               | 73.09                | 0.08      | 0.11         |

|                                                   |        |        |       |       |
|---------------------------------------------------|--------|--------|-------|-------|
| 2-Silyltetrasilane                                | 61.12  | 61.05  | 0.07  | 0.11  |
| 2-Silyltrisilane                                  | 48.88  | 49.01  | -0.13 | -0.27 |
| 3-(Triethoxysilyl)-1-propanamine                  | 59.24  | 59.23  | 0.01  | 0.02  |
| 3-(Trimethylsilyl)-1-propanol                     | 41.55  | 40.94  | 0.61  | 1.47  |
| 3-Mercaptopropyl-trimethoxysilane                 | 49.46  | 49.49  | -0.03 | -0.06 |
| 4-Bromophenyltrimethylsilane                      | 57.19  | 57.80  | -0.61 | -1.07 |
| 4-Chlorophenoxytriethylsilane                     | 69.66  | 69.38  | 0.28  | 0.40  |
| 4-Fluorophenyltrimethylsilane                     | 50.34  | 50.11  | 0.23  | 0.46  |
| 4-Trifluoromethylphenyltrimethylsilane            | 54.63  | 55.30  | -0.67 | -1.23 |
| 4-Trimethylsiloxyphenyltrimethylsilane            | 74.63  | 74.54  | 0.09  | 0.12  |
| Allylchlorodimethylsilane                         | 37.98  | 38.71  | -0.73 | -1.92 |
| Allylmethyldichlorosilane                         | 38.14  | 38.50  | -0.36 | -0.94 |
| Allyltrichlorosilane                              | 38.97  | 38.33  | 0.64  | 1.64  |
| Allyltriethoxysilane                              | 55.73  | 55.49  | 0.24  | 0.43  |
| Allyltrimethylsilane                              | 39.14  | 39.22  | -0.08 | -0.20 |
| Amylsilane                                        | 35.64  | 35.67  | -0.03 | -0.08 |
| Benzyltrimethylsilane                             | 55.11  | 54.83  | 0.28  | 0.51  |
| Bis(butylthio) 2-(diethylmethylsilyl)ethyl borane | 101.77 | 102.28 | -0.51 | -0.50 |
| Bis(diethyl)disiloxane                            | 58.54  | 58.51  | 0.03  | 0.05  |
| Bis(diethylmethylsilyl)amine                      | 69.24  | 69.58  | -0.34 | -0.49 |
| Bis(diethylsilyl)amine                            | 61.40  | 61.24  | 0.16  | 0.26  |
| Bis(dimethylamino)bis(diethylamino)silane         | 79.50  | 79.36  | 0.14  | 0.18  |
| Bis(dimethylphenylsilyl)amine                     | 91.08  | 91.06  | 0.02  | 0.02  |
| Bis(ethyldimethylsilyl)amine                      | 61.01  | 60.44  | 0.57  | 0.93  |
| Bis(ethylisobutyl)disiloxane                      | 76.95  | 76.95  | 0.00  | 0.00  |
| Bis(ethylphenyl)disiloxane                        | 88.84  | 89.13  | -0.29 | -0.33 |
| Bis(trichlorosilyl)methane                        | 51.08  | 51.72  | -0.64 | -1.25 |
| Bis(triethylsilyl)amine                           | 78.33  | 78.72  | -0.39 | -0.50 |
| Bis(trihexylsilyl)acetylene                       | 193.90 | 193.78 | 0.12  | 0.06  |
| Bis(trimethoxysilyl)amine                         | 56.30  | 56.38  | -0.08 | -0.14 |
| Bis(trimethoxysilylamino)dimethylsilane           | 77.61  | 77.64  | -0.03 | -0.04 |
| Bis(trimethylsilylamino)dimethylsilane            | 71.81  | 72.56  | -0.75 | -1.04 |
| Bromotriethylsilane                               | 46.44  | 46.60  | -0.16 | -0.34 |
| Bromotrimethylsilane                              | 32.92  | 32.89  | 0.03  | 0.09  |
| Butoxytrimethylsilane                             | 44.88  | 44.93  | -0.05 | -0.11 |
| Butylsilane                                       | 30.90  | 31.04  | -0.14 | -0.45 |
| Butyltrichlorosilane                              | 43.18  | 43.27  | -0.09 | -0.21 |
| Butyltriisothiocyanatosilane                      | 73.92  | 73.73  | 0.19  | 0.26  |
| Chloro(chloromethyl)dimethylsilane                | 34.43  | 34.50  | -0.07 | -0.20 |
| Chloro(dichloromethyl)dimethylsilane              | 39.39  | 39.44  | -0.05 | -0.13 |
| Chlorodiethylsilane                               | 34.92  | 34.70  | 0.22  | 0.63  |

|                                                      |        |        |       |       |
|------------------------------------------------------|--------|--------|-------|-------|
| Chlorodimethylphenylsilane                           | 49.33  | 49.70  | -0.37 | -0.75 |
| Chlorodimethylsilane                                 | 25.90  | 25.56  | 0.34  | 1.31  |
| Chloroethyldimethylsilane                            | 35.15  | 34.39  | 0.76  | 2.16  |
| Chloromethylphenylsilane                             | 45.46  | 45.44  | 0.02  | 0.04  |
| Chlorotriethylsilane                                 | 43.54  | 43.53  | 0.01  | 0.02  |
| Chlorotrimethylsilane                                | 29.88  | 29.82  | 0.06  | 0.20  |
| Chlorovinyl dimethylsilane                           | 34.49  | 34.01  | 0.48  | 1.39  |
| cis-1,2-Bis(trimethylsilyl)-3,3-dichlorocyclopropane | 71.37  | 70.62  | 0.75  | 1.05  |
| cis-1,2-Dis(trimethylsilyl)-ethylene                 | 57.88  | 58.06  | -0.18 | -0.31 |
| Cyclohexyloxytrimethylsilane                         | 52.12  | 52.06  | 0.06  | 0.12  |
| Cyclohexyltrifluorosilane                            | 34.26  | 34.35  | -0.09 | -0.26 |
| Decamethylcyclopentasiloxane                         | 93.33  | 93.25  | 0.08  | 0.09  |
| Decamethyltetrasiloxane                              | 86.18  | 86.25  | -0.07 | -0.08 |
| Decyldiphenylnonylsilane                             | 148.69 | 148.68 | 0.01  | 0.01  |
| Decyldiphenylsilane                                  | 106.74 | 107.04 | -0.30 | -0.28 |
| Decyloxytrimethylsilane                              | 72.71  | 72.71  | 0.00  | 0.00  |
| Di(cyclohexyloxy)dimethylsilane                      | 74.01  | 73.82  | 0.19  | 0.26  |
| Diallyldimethylsilane                                | 48.34  | 48.11  | 0.23  | 0.48  |
| Diamylsilane                                         | 58.60  | 58.56  | 0.04  | 0.07  |
| Dibutyldiisothiocyanatosilane                        | 77.77  | 77.84  | -0.07 | -0.09 |
| Dibutyldinonylsilane                                 | 131.54 | 131.95 | -0.41 | -0.31 |
| Dibutylmethylsilyl bromide                           | 60.64  | 60.55  | 0.09  | 0.15  |
| Dibutylnonylsilane                                   | 90.16  | 90.31  | -0.15 | -0.17 |
| Dibutylsilane                                        | 49.39  | 49.30  | 0.09  | 0.18  |
| Dichloro(chloromethyl)methylsilane                   | 34.17  | 34.29  | -0.12 | -0.35 |
| Dichloro(dichloromethyl)methylsilane                 | 39.13  | 39.23  | -0.10 | -0.26 |
| Dichlorodiethylsilane                                | 38.71  | 38.75  | -0.04 | -0.10 |
| Dichlorodimethylsilane                               | 29.65  | 29.61  | 0.04  | 0.13  |
| Dichlorodiphenylsilane                               | 69.99  | 69.37  | 0.62  | 0.89  |
| Dichloromethylphenylsilane                           | 48.81  | 49.49  | -0.68 | -1.39 |
| Dicosamethyldecasiloxane                             | 197.51 | 198.15 | -0.64 | -0.32 |
| Didecyldiphenylsilane                                | 153.40 | 153.31 | 0.09  | 0.06  |
| Diethoxydimethylsilane                               | 40.99  | 41.04  | -0.05 | -0.12 |
| Diethoxydiphenylsilane                               | 81.07  | 80.80  | 0.27  | 0.33  |
| Diethoxymethylphenylsilane                           | 60.85  | 60.92  | -0.07 | -0.12 |
| Diethoxymethylsilane                                 | 36.84  | 36.68  | 0.16  | 0.43  |
| Diethyl 2,2-diethylhydrazinosilane                   | 55.43  | 55.86  | -0.43 | -0.78 |
| Diethyl 2,2-dimethylhydrazinosilane                  | 46.39  | 46.68  | -0.29 | -0.63 |
| Diethyl bis(2,2-diethylhydrazino)silane              | 81.18  | 80.88  | 0.30  | 0.37  |
| Diethyl bis(2,2-dimethylhydrazino)silane             | 62.47  | 62.52  | -0.05 | -0.08 |
| Diethyl diethylaminosilane                           | 52.34  | 52.06  | 0.28  | 0.53  |

|                                           |        |        |       |       |
|-------------------------------------------|--------|--------|-------|-------|
| Diethyldifluorosilane                     | 27.74  | 27.83  | -0.09 | -0.32 |
| Diethyldiisothiocyanatosilane             | 59.55  | 59.32  | 0.23  | 0.39  |
| Diethylmethylchlorosilane                 | 38.62  | 38.96  | -0.34 | -0.88 |
| Diethylmethylsilanol                      | 35.43  | 35.61  | -0.18 | -0.51 |
| Diethylnonylsilane                        | 71.60  | 71.79  | -0.19 | -0.27 |
| Diethyloctylsilane                        | 67.23  | 67.16  | 0.07  | 0.10  |
| Diethylphenyl 1-isopropoxyethoxysilane    | 80.26  | 80.12  | 0.14  | 0.17  |
| Diethylsilane                             | 30.71  | 30.78  | -0.07 | -0.23 |
| Diethylsilanol                            | 31.62  | 31.25  | 0.37  | 1.17  |
| Difluorodiphenylsilane                    | 58.69  | 58.45  | 0.24  | 0.41  |
| Dimethoxydiphenylsilane                   | 71.70  | 71.48  | 0.22  | 0.31  |
| Dimethyl bis(2,2-diethylhydrazino)silane  | 71.55  | 71.74  | -0.19 | -0.27 |
| Dimethyl bis(2,2-dimethylhydrazino)silane | 53.54  | 53.38  | 0.16  | 0.30  |
| Dimethyl bis(2-chloropropoxy)silane       | 59.83  | 59.82  | 0.01  | 0.02  |
| Dimethyldi(2-ethylbutoxy)silane           | 78.27  | 78.00  | 0.27  | 0.34  |
| Dimethyldi(2-octyloxy)silane              | 96.44  | 96.62  | -0.18 | -0.19 |
| Dimethyldi-2-butoxysilane                 | 59.68  | 59.58  | 0.10  | 0.17  |
| Dimethyldi-2-pentoxysilane                | 68.61  | 68.84  | -0.23 | -0.34 |
| Dimethyldiacetoxysilane                   | 40.81  | 40.82  | -0.01 | -0.02 |
| Dimethyldibutoxysilane                    | 59.63  | 59.56  | 0.07  | 0.12  |
| Dimethyldidodecyloxysilane                | 133.43 | 133.64 | -0.21 | -0.16 |
| Dimethyldiheptoxysilane                   | 87.25  | 87.34  | -0.09 | -0.10 |
| Dimethyldihexoxysilane                    | 77.46  | 78.08  | -0.62 | -0.80 |
| Dimethyldiisopropoxysilane                | 49.53  | 50.32  | -0.79 | -1.59 |
| Dimethyldiisothiocyanatosilane            | 49.92  | 50.18  | -0.26 | -0.52 |
| Dimethyldimethoxysilane                   | 31.51  | 31.72  | -0.21 | -0.67 |
| Dimethyldinonyloxysilane                  | 105.67 | 105.86 | -0.19 | -0.18 |
| Dimethyldioctoxysilane                    | 96.50  | 96.60  | -0.10 | -0.10 |
| Dimethyldipentoxysilane                   | 68.38  | 68.82  | -0.44 | -0.64 |
| Dimethyldiphenoxysilane                   | 71.56  | 71.40  | 0.16  | 0.22  |
| Dimethyldiphenylsilane                    | 70.04  | 70.09  | -0.05 | -0.07 |
| Dimethyldipropoxysilane                   | 50.94  | 50.30  | 0.64  | 1.26  |
| Dimethylethylsilanol                      | 30.79  | 31.04  | -0.25 | -0.81 |
| Dimethylphenylsilane                      | 45.04  | 45.55  | -0.51 | -1.13 |
| Dimethylvinylethoxysilane                 | 39.82  | 39.86  | -0.04 | -0.10 |
| Dinonyldiphenylsilane                     | 144.50 | 144.05 | 0.45  | 0.31  |
| Diphenylmethylsilane                      | 65.28  | 65.43  | -0.15 | -0.23 |
| Diphenylmethylsilylamine                  | 68.03  | 68.05  | -0.02 | -0.03 |
| Diphenylnonylsilane                       | 102.30 | 102.41 | -0.11 | -0.11 |
| Diphenylsilane                            | 61.53  | 61.40  | 0.13  | 0.21  |
| Dipropyldifluorosilane                    | 37.24  | 37.09  | 0.15  | 0.40  |
| Dipropylsilane                            | 40.08  | 40.04  | 0.04  | 0.10  |

|                                         |        |        |       |       |
|-----------------------------------------|--------|--------|-------|-------|
| Disilanomethane                         | 27.16  | 27.26  | -0.10 | -0.37 |
| Dodecamethylcyclhexasiloxane            | 111.89 | 111.90 | -0.01 | -0.01 |
| Dodecamethylpentasiloxane               | 104.79 | 104.90 | -0.11 | -0.10 |
| Eicosamethylnonasiloxane                | 179.30 | 179.50 | -0.20 | -0.11 |
| Ethoxytriethylsilane                    | 49.10  | 49.38  | -0.28 | -0.57 |
| Ethoxytriethylsilane                    | 105.58 | 104.94 | 0.64  | 0.61  |
| Ethoxytrimethylsilane                   | 35.67  | 35.67  | 0.00  | 0.00  |
| Ethyl bis(2,2-diethylhydrazino)silane   | 71.76  | 71.89  | -0.13 | -0.18 |
| Ethyl bis(2,2-dimethylhydrazino)silane  | 53.67  | 53.53  | 0.14  | 0.26  |
| Ethyl bis(2-chloropropoxy)silane        | 59.73  | 60.03  | -0.30 | -0.50 |
| Ethyl bis(diethylamino)silane           | 64.26  | 64.29  | -0.03 | -0.05 |
| Ethyl isobutyl 2-chloropropoxysilane    | 59.24  | 59.06  | 0.18  | 0.30  |
| Ethyl tris(2,2-diethylhydrazino)silane  | 96.93  | 96.81  | 0.12  | 0.12  |
| Ethylaminotriethylsilane                | 51.46  | 51.36  | 0.10  | 0.19  |
| Ethylcyclohexyldifluorosilane           | 44.31  | 44.26  | 0.05  | 0.11  |
| Ethyldibutoxysilane                     | 59.63  | 59.77  | -0.14 | -0.23 |
| Ethyldimethyl 1-(3-pentoxo)ethoxysilane | 64.89  | 64.93  | -0.04 | -0.06 |
| Ethylisobutylsilanol                    | 40.40  | 40.47  | -0.07 | -0.17 |
| Ethylphenylchlorosilane                 | 49.44  | 50.01  | -0.57 | -1.15 |
| Ethyltributoxysilane                    | 78.67  | 78.95  | -0.28 | -0.36 |
| Ethyltrichlorosilane                    | 33.83  | 34.01  | -0.18 | -0.53 |
| Ethyltriethoxysilane                    | 51.50  | 51.17  | 0.33  | 0.64  |
| Ethyltriisothiocyanatosilane            | 64.17  | 64.47  | -0.30 | -0.47 |
| Ethyltrimethoxysilane                   | 37.01  | 37.19  | -0.18 | -0.49 |
| Fluoroethyldiisopropylsilane            | 47.71  | 47.87  | -0.16 | -0.34 |
| Fluorotributylsilane                    | 66.71  | 66.29  | 0.42  | 0.63  |
| Fluorotriethylsilane                    | 38.10  | 38.51  | -0.41 | -1.08 |
| Fluorotripentylsilane                   | 80.30  | 80.18  | 0.12  | 0.15  |
| Fluorotripropylsilane                   | 52.33  | 52.40  | -0.07 | -0.13 |
| Heptasilane                             | 84.77  | 84.84  | -0.07 | -0.08 |
| Heptyloxytrimethylsilane                | 58.80  | 58.82  | -0.02 | -0.03 |
| Hexadecamethylheptasiloxane             | 142.31 | 142.20 | 0.11  | 0.08  |
| Hexaethyldisiloxane                     | 75.92  | 76.37  | -0.45 | -0.59 |
| Hexamethyldisilane                      | 51.42  | 51.36  | 0.06  | 0.12  |
| Hexamethyldisiloxane                    | 48.94  | 48.95  | -0.01 | -0.02 |
| Hexapropyldisiloxane                    | 104.05 | 104.15 | -0.10 | -0.10 |
| Hexasilane                              | 72.78  | 72.80  | -0.02 | -0.03 |
| Hexyloxytrimethylsilane                 | 54.16  | 54.19  | -0.03 | -0.06 |
| Hexylsilane                             | 40.34  | 40.30  | 0.04  | 0.10  |
| HMDS                                    | 51.55  | 51.30  | 0.25  | 0.48  |
| iso-Butylsilane                         | 31.05  | 31.00  | 0.05  | 0.16  |
| Isopentyloxytrimethylsilane             | 49.54  | 49.52  | 0.02  | 0.04  |

|                                                   |        |        |       |       |
|---------------------------------------------------|--------|--------|-------|-------|
| Isopropylmethylsilane                             | 30.66  | 30.89  | -0.23 | -0.75 |
| Isopropyltriisothiocyanatosilane                  | 69.52  | 69.15  | 0.37  | 0.53  |
| Isopropyltrimethylsilane                          | 38.47  | 39.58  | -1.11 | -2.89 |
| Methoxytriethylsilane                             | 44.49  | 44.72  | -0.23 | -0.52 |
| Methoxytrimethylsilane                            | 30.80  | 31.01  | -0.21 | -0.68 |
| Methoxytripropylsilane                            | 58.64  | 58.61  | 0.03  | 0.05  |
| Methyl bis(2,2-diethylhydrazino)silane            | 67.18  | 67.32  | -0.14 | -0.21 |
| Methyl bis(2,2-dimethylhydrazino)silane           | 48.80  | 48.96  | -0.16 | -0.33 |
| Methyl bis(2-chloropropoxy)silane                 | 55.37  | 55.46  | -0.09 | -0.16 |
| Methyl bis(diethylamino)silane                    | 59.99  | 59.72  | 0.27  | 0.45  |
| Methyl tris(2,2-diethylhydrazino)silane           | 92.26  | 92.24  | 0.02  | 0.02  |
| Methylcyclohexyldifluorosilane                    | 39.68  | 39.69  | -0.01 | -0.03 |
| Methyldibutoxysilane                              | 54.87  | 55.20  | -0.33 | -0.60 |
| Methyldichloro-2-(2,4-dichlorophenoxy)ethylsilane | 70.31  | 70.12  | 0.19  | 0.27  |
| Methyldichloro-2-(4-chlorophenoxy)ethylsilane     | 65.49  | 65.30  | 0.19  | 0.29  |
| Methyldichloro-2,4-dichlorophenoxyethylsilane     | 60.94  | 60.20  | 0.74  | 1.21  |
| Methyldichloro-2-butoxyethylsilane                | 55.11  | 54.39  | 0.72  | 1.31  |
| Methyldichloro-2-isobutoxyethylsilane             | 54.52  | 54.35  | 0.17  | 0.31  |
| Methyldichloro-2-phenoxyethylsilane               | 60.39  | 60.48  | -0.09 | -0.15 |
| Methyldichloro-4-chlorophenoxyethylsilane         | 55.08  | 55.38  | -0.30 | -0.54 |
| Methyldichlorobutoxysilane                        | 44.66  | 44.64  | 0.02  | 0.04  |
| Methyldichlorophenoxyethylsilane                  | 50.14  | 50.56  | -0.42 | -0.84 |
| Methyldiethyl-2-phenoxyethylsilane                | 70.07  | 70.34  | -0.27 | -0.39 |
| Methyldiethylphenoxyethylsilane                   | 60.29  | 59.99  | 0.30  | 0.50  |
| Methylnonylphenylsilane                           | 82.90  | 82.53  | 0.37  | 0.45  |
| Methyloctylphenylsilane                           | 78.18  | 77.90  | 0.28  | 0.36  |
| Methylphenyldifluorosilane                        | 38.26  | 38.57  | -0.31 | -0.81 |
| Methylphenylsilane                                | 40.82  | 41.52  | -0.70 | -1.71 |
| Methylpropylsilane                                | 30.73  | 30.84  | -0.11 | -0.36 |
| Methylsilanetriol triacetate                      | 46.27  | 46.27  | 0.00  | 0.00  |
| Methyltri(2-octyloxy)silane                       | 129.85 | 129.97 | -0.12 | -0.09 |
| Methyltributoxysilane                             | 74.39  | 74.38  | 0.01  | 0.01  |
| Methyltrichlorosilane                             | 29.13  | 29.44  | -0.31 | -1.06 |
| Methyltriheptyloxysilane                          | 116.01 | 116.05 | -0.04 | -0.03 |
| Methyltrihexyloxysilane                           | 102.11 | 102.16 | -0.05 | -0.05 |
| Methyltriisopentyloxysilane                       | 88.26  | 88.15  | 0.11  | 0.12  |
| Methyltripentyloxysilane                          | 88.20  | 88.27  | -0.07 | -0.08 |
| Methyltriphenoxysilane                            | 91.85  | 92.14  | -0.29 | -0.32 |
| Methylvinylchlorosilane                           | 33.33  | 33.80  | -0.47 | -1.41 |
| N-(1,1-Dimethylpropyl)aminotriethylsilane         | 64.79  | 65.18  | -0.39 | -0.60 |

|                                                 |        |        |       |       |
|-------------------------------------------------|--------|--------|-------|-------|
| N-(3-(Trimethoxysilyl)propyl)-1,2-ethanediamine | 58.21  | 57.88  | 0.33  | 0.57  |
| N,N-Dibutylaminotriethylsilane                  | 78.65  | 79.32  | -0.67 | -0.85 |
| N,N-Diethylaminotriethylsilane                  | 60.99  | 60.80  | 0.19  | 0.31  |
| N,N-Diisobutylaminotriethylsilane               | 78.67  | 79.24  | -0.57 | -0.72 |
| N-Fenchylaminotriethylsilane                    | 83.74  | 83.97  | -0.23 | -0.27 |
| N-Isopropylaminotriethylsilane                  | 56.05  | 55.92  | 0.13  | 0.23  |
| Nonyloxytrimethylsilane                         | 68.07  | 68.08  | -0.01 | -0.01 |
| N-Propylaminotriethylsilane                     | 56.11  | 55.99  | 0.12  | 0.21  |
| N-t-Butylaminotriethylsilane                    | 60.63  | 60.55  | 0.08  | 0.13  |
| Octadecamethyloctasiloxane                      | 160.19 | 160.85 | -0.66 | -0.41 |
| Octadecyltrichlorosilane                        | 108.02 | 108.09 | -0.07 | -0.06 |
| Octamethylcyclotetrasiloxane                    | 74.68  | 74.60  | 0.08  | 0.11  |
| Octamethyltrisiloxane                           | 67.44  | 67.60  | -0.16 | -0.24 |
| Octyloxytrimethylsilane                         | 63.43  | 63.45  | -0.02 | -0.03 |
| Pentasilane                                     | 60.80  | 60.76  | 0.04  | 0.07  |
| Pentyloxytrimethylsilane                        | 49.52  | 49.56  | -0.04 | -0.08 |
| Pentyltrichlorosilane                           | 48.79  | 47.90  | 0.89  | 1.82  |
| Phenoxytriethylsilane                           | 64.47  | 64.56  | -0.09 | -0.14 |
| Phenoxytrimethylsilane                          | 51.17  | 50.85  | 0.32  | 0.63  |
| Phenoxytripropylsilane                          | 78.41  | 78.45  | -0.04 | -0.05 |
| Phenylsilane                                    | 37.44  | 37.09  | 0.35  | 0.93  |
| Phenyltri(2-octyloxy)silane                     | 149.82 | 149.85 | -0.03 | -0.02 |
| Phenyltri(cyclohexyloxy)silane                  | 115.70 | 115.65 | 0.05  | 0.04  |
| Phenyltrichlorosilane                           | 48.92  | 49.32  | -0.40 | -0.82 |
| Phenyltrifluorosilane                           | 33.09  | 33.23  | -0.14 | -0.42 |
| Phenyltriisopentyloxysilane                     | 108.25 | 108.03 | 0.22  | 0.20  |
| Phenyltrimethylsilane                           | 49.88  | 50.21  | -0.33 | -0.66 |
| Propyltrichlorosilane                           | 38.46  | 38.64  | -0.18 | -0.47 |
| Propyltriisothiocyanatosilane                   | 68.69  | 69.10  | -0.41 | -0.60 |
| t-Butoxytriethylsilane                          | 58.54  | 58.59  | -0.05 | -0.09 |
| t-Butoxytrimethylsilane                         | 44.98  | 44.88  | 0.10  | 0.22  |
| t-Butoxytripropylsilane                         | 72.68  | 72.48  | 0.20  | 0.28  |
| Tetra(1H,1H,3H-perfluoropropyl)silicate         | 72.19  | 72.10  | 0.09  | 0.12  |
| Tetra(1H,1H,5H-perfluoropentyl)silicate         | 111.97 | 112.18 | -0.21 | -0.19 |
| Tetra(2-ethylbutyl) silicate                    | 125.53 | 126.42 | -0.89 | -0.71 |
| Tetra(diethylamino)silane                       | 97.33  | 97.72  | -0.39 | -0.40 |
| Tetra(dimethylamino)silane                      | 61.29  | 61.00  | 0.29  | 0.47  |
| Tetra-2-butoxysilane                            | 90.48  | 89.58  | 0.90  | 0.99  |
| Tetra-2-methyl-1-propoxysilane                  | 88.88  | 89.38  | -0.50 | -0.56 |
| Tetra-2-pentoxysilane                           | 108.98 | 108.10 | 0.88  | 0.81  |
| Tetra-3-methyl-1-butoxysilane                   | 107.23 | 107.90 | -0.67 | -0.62 |

|                                                        |        |        |       |       |
|--------------------------------------------------------|--------|--------|-------|-------|
| Tetrabutoxysilane                                      | 88.88  | 89.54  | -0.66 | -0.74 |
| Tetracosamethylhendecasiloxane                         | 217.25 | 216.80 | 0.45  | 0.21  |
| Tetradecamethylcycloheptasiloxane                      | 130.84 | 130.55 | 0.29  | 0.22  |
| Tetradecamethylhexasiloxane                            | 123.45 | 123.55 | -0.10 | -0.08 |
| Tetraethoxysilane                                      | 53.33  | 52.50  | 0.83  | 1.56  |
| Tetraethylsilane                                       | 48.37  | 48.61  | -0.24 | -0.50 |
| Tetrahexoxysilane                                      | 127.50 | 126.58 | 0.92  | 0.72  |
| Tetraisobutylsilane                                    | 86.00  | 85.49  | 0.51  | 0.59  |
| Tetraisopropoxysilane                                  | 70.82  | 71.06  | -0.24 | -0.34 |
| Tetraisopropylsilane                                   | 66.92  | 67.33  | -0.41 | -0.61 |
| Tetramethylsilane                                      | 29.95  | 30.33  | -0.38 | -1.27 |
| Tetramethyltetraphenylcyclotetrasiloxane               | 154.31 | 154.12 | 0.19  | 0.12  |
| Tetramethyoxysilane                                    | 33.51  | 33.86  | -0.35 | -1.04 |
| Tetraoctoxysilane                                      | 163.90 | 163.62 | 0.28  | 0.17  |
| Tetrapentoxysilane                                     | 107.38 | 108.06 | -0.68 | -0.63 |
| Tetrapropoxysilane                                     | 70.65  | 71.02  | -0.37 | -0.52 |
| Tetrasilane                                            | 48.89  | 48.72  | 0.17  | 0.35  |
| Tetravinylsilane                                       | 46.88  | 47.09  | -0.21 | -0.45 |
| trans-1,2-Bis(trimethylsilyl)-3,3-dichlorocyclopropane | 71.02  | 70.62  | 0.40  | 0.56  |
| Tributylisothiocyanatosilane                           | 82.05  | 81.60  | 0.45  | 0.55  |
| Tributylsilane                                         | 67.51  | 67.16  | 0.35  | 0.52  |
| Tributylsilanol                                        | 67.79  | 67.96  | -0.17 | -0.25 |
| Tributylsilylamine                                     | 69.61  | 69.78  | -0.17 | -0.24 |
| Trichloro-2-phenoxyethylsilane                         | 60.44  | 60.31  | 0.13  | 0.22  |
| Trichlorovinylsilane                                   | 33.54  | 33.63  | -0.09 | -0.27 |
| Triethoxymethylsilane                                  | 46.50  | 46.60  | -0.10 | -0.22 |
| Triethoxypentylsilane                                  | 64.96  | 65.06  | -0.10 | -0.15 |
| Triethoxyphenylsilane                                  | 66.15  | 66.48  | -0.33 | -0.50 |
| Triethyl 1-propoxyethoxysilane                         | 65.15  | 64.80  | 0.35  | 0.54  |
| Triethyl 2,2-diethylhydrazinosilane                    | 64.50  | 64.60  | -0.10 | -0.16 |
| Triethyl 2,2-dimethylhydrazinosilane                   | 55.48  | 55.42  | 0.06  | 0.11  |
| Triethylisothiocyanatosilane                           | 53.85  | 53.82  | 0.03  | 0.06  |
| Triethylsilane                                         | 39.60  | 39.38  | 0.22  | 0.56  |
| Triethylsilanol                                        | 40.59  | 40.18  | 0.41  | 1.01  |
| Triethylsilylamine                                     | 42.07  | 42.00  | 0.07  | 0.17  |
| Triethylsilyloxytripropylsilane                        | 90.19  | 90.26  | -0.07 | -0.08 |
| Triethyltriphenylcyclotrisiloxane                      | 129.17 | 129.30 | -0.13 | -0.10 |
| Triisopropoxyvinylsilane                               | 65.03  | 64.71  | 0.32  | 0.49  |
| Triisopropylethoxysilane                               | 63.56  | 63.42  | 0.14  | 0.22  |
| Triisopropylphenylsilane                               | 77.50  | 77.96  | -0.46 | -0.59 |
| Triisopropylsilane                                     | 53.57  | 53.42  | 0.15  | 0.28  |



|                                         |        |        |       |       |
|-----------------------------------------|--------|--------|-------|-------|
| Triisopropylsilyl chloride              | 57.72  | 57.57  | 0.15  | 0.26  |
| Trimethoxymethylsilane                  | 32.24  | 32.62  | -0.38 | -1.18 |
| Trimethoxyphenylsilane                  | 52.32  | 52.50  | -0.18 | -0.34 |
| Trimethoxysilylamine                    | 30.95  | 30.83  | 0.12  | 0.39  |
| Trimethyl 1-ethoxyethoxysilane          | 46.52  | 46.46  | 0.06  | 0.13  |
| Trimethyl 1-isopropoxyethoxysilane      | 51.15  | 51.10  | 0.05  | 0.10  |
| Trimethyl 2,2-diethylhydrazinosilane    | 50.99  | 50.89  | 0.10  | 0.20  |
| Trimethyl 2,2-dimethylhydrazinosilane   | 41.77  | 41.71  | 0.06  | 0.14  |
| Trimethylisothiocyanatosilane           | 40.13  | 40.11  | 0.02  | 0.05  |
| Trimethylsilanol                        | 26.22  | 26.47  | -0.25 | -0.95 |
| Trimethylsilylaminodimethylphenylsilane | 71.09  | 71.18  | -0.09 | -0.13 |
| Trimethylsilylaminodiphenylmethylsilane | 91.05  | 91.06  | -0.01 | -0.01 |
| Trimethylsilylaminotriethylsilane       | 65.00  | 65.01  | -0.01 | -0.02 |
| Trimethylsilylaminotrimethoxysilane     | 53.70  | 53.84  | -0.14 | -0.26 |
| Trimethylsilylaminotriphenylsilane      | 111.69 | 110.94 | 0.75  | 0.67  |
| Trimethylsilyloxytriethylsilane         | 62.45  | 62.66  | -0.21 | -0.34 |
| Trimethylsilyloxytripropylsilane        | 76.55  | 76.55  | 0.00  | 0.00  |
| Trimethylvinylsilane                    | 34.55  | 34.52  | 0.03  | 0.09  |
| Triptylsilane                           | 81.54  | 81.05  | 0.49  | 0.60  |
| Tripropylsilane                         | 52.75  | 53.27  | -0.52 | -0.99 |
| Tris(dimethylamino)dibutylaminosilane   | 88.58  | 88.70  | -0.12 | -0.14 |
| Trisilane                               | 36.61  | 36.68  | -0.07 | -0.19 |
| Vinyl tris(2-chloropropoxy)silane       | 79.31  | 78.96  | 0.35  | 0.44  |
| Vinyldiethoxymethylsilane               | 45.09  | 45.23  | -0.14 | -0.31 |
| Vinyltriacetoxysilane                   | 50.55  | 50.46  | 0.09  | 0.18  |
| Vinyltriethoxysilane                    | 50.75  | 50.79  | -0.04 | -0.08 |
| Vinyltrimethoxysilane                   | 36.41  | 36.81  | -0.40 | -1.10 |
