# Supplementary material
Source: MDPI journal article supplement (https://www.mdpi.com/2673-8015/2/4/20)
Supplement: s1 [file s1]

| Molecule name                                     | Refractivity<br>exp | Refractivity<br>calc | Deviation | Dev.<br>in % |
|---------------------------------------------------|---------------------|----------------------|-----------|--------------|
| 1,2-Bis(dipentylborinoxy)ethane                   | 116.12              | 116.10               | 0.02      | 0.02         |
| 1,3,5-Tributylborazine                            | 79.59               | 79.86                | -0.27     | -0.34        |
| 1,3,5-Triethylborazine                            | 52.48               | 52.08                | 0.40      | 0.76         |
| 1,3-Bis(dibutoxyboryl)propane                     | 104.73              | 104.83               | -0.10     | -0.10        |
| 1,3-Bis(dichloroboryl)propane                     | 44.12               | 44.25                | -0.13     | -0.29        |
| 1,3-Bis(dimethoxyboryl)propane                    | 48.96               | 49.15                | -0.19     | -0.39        |
| 1,4-Bis(dichloroboryl)butane                      | 48.79               | 48.88                | -0.09     | -0.18        |
| 1,4-Bis(diethoxyboryl)butane                      | 73.12               | 72.42                | 0.70      | 0.96         |
| 1,5-Bis(diethoxyboryl)pentane                     | 77.13               | 77.05                | 0.08      | 0.10         |
| 1,6-Bis(diethoxyboryl)hexane                      | 81.81               | 81.68                | 0.13      | 0.16         |
| 2-Butoxy-2-bora-1,3-dioxacyclopentane             | 37.13               | 36.61                | 0.52      | 1.40         |
| 2-Tolyl 3-tolyl propoxyborine                     | 82.11               | 81.86                | 0.25      | 0.30         |
| 2-Tolyl 4-tolyl propoxyborine                     | 82.26               | 81.86                | 0.40      | 0.49         |
| 2-Tolyl dibutoxyborine                            | 76.18               | 76.43                | -0.25     | -0.33        |
| 2-Tolyl diethoxyborine                            | 57.69               | 57.91                | -0.22     | -0.38        |
| 2-Tolyl dimethoxyborine                           | 48.14               | 48.59                | -0.45     | -0.93        |
| 2-Tolyl dipropoxyborine                           | 66.97               | 67.17                | -0.20     | -0.30        |
| 3-Tolyl dibutoxyborine                            | 76.48               | 76.43                | 0.05      | 0.07         |
| 3-Tolyl diethoxyborine                            | 58.08               | 57.91                | 0.17      | 0.29         |
| 3-Tolyl dimethoxyborine                           | 48.38               | 48.59                | -0.21     | -0.43        |
| 3-Tolyl dipropoxyborine                           | 67.26               | 67.17                | 0.09      | 0.13         |
| 4-Tolyl dibutoxyborine                            | 76.67               | 76.43                | 0.24      | 0.31         |
| 4-Tolyl diethoxyborine                            | 58.04               | 57.91                | 0.13      | 0.22         |
| 4-Tolyl dimethoxyborine                           | 48.49               | 48.59                | -0.10     | -0.21        |
| 4-Tolyl dipropoxyborine                           | 67.42               | 67.17                | 0.25      | 0.37         |
| Bis(2-tolyl)-N-ethylaminoborane                   | 79.12               | 78.87                | 0.25      | 0.32         |
| Bis(2-tolyl)-N-isobutylaminoborane                | 88.08               | 88.09                | -0.01     | -0.01        |
| Bis(2-tolyl)-N-methylaminoborane                  | 74.00               | 74.28                | -0.28     | -0.38        |
| Bis(allylamino)borane                             | 40.89               | 41.33                | -0.44     | -1.08        |
| Bis(butylamino)borane                             | 51.24               | 51.21                | 0.03      | 0.06         |
| Bis(butylthio) 2-(diethylmethylsilyl)ethyl borane | 101.77              | 102.28               | -0.51     | -0.50        |
| Bis(butylthio) hexyl borane                       | 88.58               | 88.16                | 0.42      | 0.47         |
| Bis(butylthio) octyl borane                       | 98.30               | 97.42                | 0.88      | 0.90         |
| Bis(butylthio)borane                              | 60.17               | 60.27                | -0.10     | -0.17        |
| Bis(diallylamino)borane                           | 67.84               | 68.71                | -0.87     | -1.28        |
| Bis(diethylamino)borane                           | 51.54               | 51.43                | 0.11      | 0.21         |
| Bis(di-isoamylamino)borane                        | 107.11              | 106.83               | 0.28      | 0.26         |
| Bis(diisobutylamino)borane                        | 88.26               | 88.31                | -0.05     | -0.06        |
| Bis(ethylthio) butylborane                        | 60.19               | 60.38                | -0.19     | -0.32        |

|                                         |       |       |       |       |
|-----------------------------------------|-------|-------|-------|-------|
| Bis(ethylthio) isobutylborane           | 60.30 | 60.34 | -0.04 | -0.07 |
| Bis(ethylthio) isopropylborane          | 55.34 | 55.77 | -0.43 | -0.78 |
| Bis(ethylthio) octyl borane             | 78.77 | 78.90 | -0.13 | -0.17 |
| Bis(ethylthio) propylborane             | 55.66 | 55.75 | -0.09 | -0.16 |
| Bis(ethylthio)borane                    | 41.16 | 41.75 | -0.59 | -1.43 |
| Bis(isobutyl) cyclohexylboronate        | 72.44 | 72.12 | 0.32  | 0.44  |
| Bis(isopropylthio)borane                | 51.08 | 50.99 | 0.09  | 0.18  |
| Bis(propylthio)borane                   | 50.77 | 51.01 | -0.24 | -0.47 |
| Bis(t-butylthio)borane                  | 61.77 | 61.01 | 0.76  | 1.23  |
| Bromo butylthio isopentylborane         | 64.00 | 63.96 | 0.04  | 0.06  |
| Bromo ethylthio isopentylborane         | 54.51 | 54.70 | -0.19 | -0.35 |
| Bromo ethylthio isopropylborane         | 45.04 | 45.50 | -0.46 | -1.02 |
| Bromo ethylthio phenylborane            | 57.27 | 56.67 | 0.60  | 1.05  |
| Butoxy chloro phenylborine              | 56.56 | 56.22 | 0.34  | 0.60  |
| Butyl butoxy chloroborine               | 49.43 | 49.66 | -0.23 | -0.47 |
| Butyl dibutoxyborine                    | 64.87 | 65.06 | -0.19 | -0.29 |
| Butylphenylboronic acid                 | 50.06 | 50.81 | -0.75 | -1.50 |
| Butylthiodiethylborane                  | 52.20 | 52.20 | 0.00  | 0.00  |
| Chloro 2-octoxy phenylborine            | 74.42 | 74.75 | -0.33 | -0.44 |
| Chloro di(1,2,2-trimethylpropoxy)borine | 69.31 | 69.36 | -0.05 | -0.07 |
| Chloro di(2-octoxy)borine               | 87.34 | 87.92 | -0.58 | -0.66 |
| Chloro di(sec-butoxy)borine             | 50.69 | 50.88 | -0.19 | -0.37 |
| Chloro dibutoxyborine                   | 51.03 | 50.86 | 0.17  | 0.33  |
| Chloro diisobutoxyborine                | 50.35 | 50.78 | -0.43 | -0.85 |
| Chloro dineopentoxyborine               | 60.34 | 60.08 | 0.26  | 0.43  |
| Chloro dioctoxyborine                   | 88.29 | 87.90 | 0.39  | 0.44  |
| Chloro dipropoxyborine                  | 41.83 | 41.60 | 0.23  | 0.55  |
| Cyclohexyldichloroborane                | 41.98 | 41.91 | 0.07  | 0.17  |
| Dibutoxy 2-hydroxyethoxy borine         | 59.48 | 58.68 | 0.80  | 1.34  |
| Dibutylboronic anhydride                | 86.44 | 87.19 | -0.75 | -0.87 |
| Dibutylbutylaminoborane                 | 65.68 | 65.39 | 0.29  | 0.44  |
| Dibutylethylthioborane                  | 61.49 | 61.46 | 0.03  | 0.05  |
| Dibutylphenylaminoborane                | 72.53 | 72.57 | -0.04 | -0.06 |
| Dibutylphenylthioborane                 | 76.46 | 76.82 | -0.36 | -0.47 |
| Dichloro 4-chlorobutoxyborine           | 40.73 | 40.65 | 0.08  | 0.20  |
| Dichloro butoxyborine                   | 36.03 | 35.85 | 0.18  | 0.50  |
| Dichloro isobutoxyborine                | 36.55 | 35.81 | 0.74  | 2.02  |
| Dichloro neopentoxyborine               | 40.51 | 40.46 | 0.05  | 0.12  |
| Dichloro octoxyborine                   | 53.85 | 54.37 | -0.52 | -0.97 |
| Dichloro propoxyborine                  | 30.62 | 31.22 | -0.60 | -1.96 |
| Diisoamylbutylthioborane                | 79.99 | 79.90 | 0.09  | 0.11  |
| Diisobutylboronic anhydride             | 87.73 | 87.03 | 0.70  | 0.80  |

|                                   |        |        |       |       |
|-----------------------------------|--------|--------|-------|-------|
| Diisobutylbutylthioborane         | 71.06  | 70.64  | 0.42  | 0.59  |
| Diisopentylboronic anhydride      | 105.56 | 105.55 | 0.01  | 0.01  |
| Diisopropylboronic anhydride      | 68.78  | 68.75  | 0.03  | 0.04  |
| Dioctyl butoxyborine              | 100.02 | 100.79 | -0.77 | -0.77 |
| Dipropylbutylthioborane           | 61.51  | 61.46  | 0.05  | 0.08  |
| Dipropylethylthioborane           | 52.48  | 52.20  | 0.28  | 0.53  |
| Dipropylisobutylaminoborane       | 55.99  | 56.09  | -0.10 | -0.18 |
| Dipropylphenylaminoborane         | 63.31  | 63.31  | 0.00  | 0.00  |
| Dipropylphenylthioborane          | 67.67  | 67.56  | 0.11  | 0.16  |
| Ethyl phenyl butoxyborine         | 61.09  | 61.05  | 0.04  | 0.07  |
| Ethylphenylboronic acid           | 42.13  | 41.55  | 0.58  | 1.38  |
| Ethylphenylboronic anhydride      | 82.57  | 81.79  | 0.78  | 0.94  |
| Ethylthio dioctyl borane          | 98.03  | 98.50  | -0.47 | -0.48 |
| Ethylthiodiethylborane            | 42.82  | 42.94  | -0.12 | -0.28 |
| Hexyldichloroborane               | 44.07  | 44.03  | 0.04  | 0.09  |
| Isobutyl cyclohexylchloroboronate | 56.96  | 56.76  | 0.20  | 0.35  |
| o-Tolylamino(diethylamino)borane  | 63.48  | 63.31  | 0.17  | 0.27  |
| Pentyldichloroborane              | 39.49  | 39.40  | 0.09  | 0.23  |
| Phenyl 2-tolyl propoxyborine      | 77.12  | 77.05  | 0.07  | 0.09  |
| Phenyl di(sec-butoxy)borine       | 71.45  | 71.64  | -0.19 | -0.27 |
| Phenyl di(sec-octoxy)borine       | 108.55 | 108.68 | -0.13 | -0.12 |
| Phenyl dibutoxyborine             | 71.32  | 71.62  | -0.30 | -0.42 |
| Phenyl diethoxyborine             | 52.87  | 53.10  | -0.23 | -0.44 |
| Phenyl diisobutoxyborine          | 71.44  | 71.54  | -0.10 | -0.14 |
| Phenyl dimethoxyborine            | 43.45  | 43.78  | -0.33 | -0.76 |
| Phenyl dipropoxyborine            | 62.40  | 62.36  | 0.04  | 0.06  |
| Phenylamino(diethylamino)borane   | 58.85  | 58.50  | 0.35  | 0.59  |
| Phenylboron dichloride            | 41.64  | 41.33  | 0.31  | 0.74  |
| Phenylpropylboronic acid          | 46.40  | 46.18  | 0.22  | 0.47  |
| Phenylpropylboronic anhydride     | 90.30  | 91.05  | -0.75 | -0.83 |
| Tri(1,2,2-trimethylpropoxy)borine | 93.61  | 94.28  | -0.67 | -0.72 |
| Tri(1,3-dichloro-2-propoxy)borine | 81.12  | 81.47  | -0.35 | -0.43 |
| Tri(1-chloroethoxy)borine         | 52.99  | 53.51  | -0.52 | -0.98 |
| Tri(1-ethoxycarbonylethoxy)borine | 85.93  | 85.70  | 0.23  | 0.27  |
| Tri(1-methoxyethoxy)borine        | 57.42  | 57.14  | 0.28  | 0.49  |
| Tri(2-ethoxycarbonylethoxy)borine | 84.97  | 85.67  | -0.70 | -0.82 |
| Tri(2-pentoxy)borine              | 80.11  | 80.45  | -0.34 | -0.42 |
| Tri(butylthio)borane              | 87.47  | 87.36  | 0.11  | 0.13  |
| Tri(ethoxycarbonylmethoxy)borine  | 71.14  | 71.78  | -0.64 | -0.90 |
| Tri(propylthio)borane             | 73.47  | 73.47  | 0.00  | 0.00  |
| Tri(t-butoxy)borine               | 66.77  | 66.38  | 0.39  | 0.58  |
| Tributyl borate                   | 66.65  | 66.53  | 0.12  | 0.18  |

|                       |        |        |       |       |
|-----------------------|--------|--------|-------|-------|
| Tridecyl borate       | 149.41 | 149.87 | -0.46 | -0.31 |
| Triethyl borate       | 38.69  | 38.75  | -0.06 | -0.16 |
| Triethylborane        | 33.72  | 34.51  | -0.79 | -2.34 |
| Triheptyl borate      | 109.18 | 108.20 | 0.98  | 0.90  |
| Triisobutylborane     | 62.31  | 62.17  | 0.14  | 0.22  |
| Triisopentoxyborine   | 80.14  | 80.30  | -0.16 | -0.20 |
| Triisopentylborane    | 76.54  | 76.06  | 0.48  | 0.63  |
| Triisopropyl borate   | 52.52  | 52.67  | -0.15 | -0.29 |
| Trimethoxyborine      | 24.86  | 24.77  | 0.09  | 0.36  |
| Trioctyl borate       | 122.30 | 122.09 | 0.21  | 0.17  |
| Tripentoxyborine      | 80.42  | 80.42  | 0.00  | 0.00  |
| Tripropyl borate      | 52.55  | 52.64  | -0.09 | -0.17 |
| Tripropylborane       | 48.54  | 48.40  | 0.14  | 0.29  |
| Tris(ethylthio)borane | 59.41  | 59.58  | -0.17 | -0.29 |
