# Supplementary material
Source: MDPI journal article supplement (https://www.mdpi.com/2673-8015/2/4/20)
Supplement: s1 [file s1]

| Molecule name                                                                  | Refractivity<br>exp | Refractivity<br>calc |
|--------------------------------------------------------------------------------|---------------------|----------------------|
| ((3-Methylbutoxy)methyl)benzene                                                | 55.63               | 56.13                |
| ((4-tert-Butylphenoxy)methyl)oxirane                                           | 60                  | 60.57                |
| ((Chloromethoxy)methyl)benzene                                                 | 41.89               | 42.42                |
| (-)-alpha-Pinene                                                               | 39.19               | 39.3                 |
| (-)-Carveol                                                                    | 46.75               | 47.31                |
| (+)-alpha-Thujene                                                              | 44.23               | 43.93                |
| (1-Bromoethyl)benzene                                                          | 43.84               | 43.75                |
| (1-Bromovinyl)benzene                                                          | 43.93               | 43.06                |
| (1-Methylvinyl)cyclopropane                                                    | 27.98               | 27.5                 |
| (2-Bromoethyl)benzene                                                          | 43.78               | 43.7                 |
| (2-Bromoethyl)cyclohexane                                                      | 44.71               | 44.74                |
| (2-Chloro-1,1-dimethylethyl)benzene                                            | 49.35               | 50                   |
| (2-Iodoethyl)benzene                                                           | 49.59               | 48.84                |
| (2-Methyl-1-propenyl)benzene                                                   | 46                  | 45.09                |
| (2-Phenylethyl)trichlorosilane                                                 | 58.62               | 58.57                |
| (3-Bromopropyl)benzene                                                         | 47.96               | 48.33                |
| (3-Chloropropyl)benzene                                                        | 44.23               | 45.39                |
| (3-Chloropropyl)trichlorosilane                                                | 43.26               | 43.44                |
| (3-Chloropropyl)trimethoxysilane                                               | 46.53               | 46.62                |
| (3-Chloropropyl)trimethylsilane                                                | 44.47               | 44.33                |
| (4-Bromophenoxy)trimethylsilane                                                | 58.55               | 58.44                |
| (4-Chlorophenyl)trichlorosilane                                                | 55.04               | 54.14                |
| (4-Methoxyphenyl)trimethylsilane                                               | 56.94               | 56.73                |
| (4-Methylphenyl)trimethylsilane                                                | 54.82               | 55.02                |
| (5Z,8Z,11Z,14Z)-Eicosatetraenoic acid                                          | 95.64               | 95.54                |
| (6Z)-Octadecenoic acid                                                         | 87.81               | 86.88                |
| (9Z)-Octadecenoic acid                                                         | 86.29               | 86.88                |
| (Bromomethyl)chlorodimethylsilane                                              | 37.57               | 37.57                |
| (Bromomethyl)cyclohexane                                                       | 39.95               | 40.11                |
| (Bromomethyl)oxirane                                                           | 24.27               | 23.33                |
| (Bromomethyl)trimethylsilane                                                   | 38.09               | 38.08                |
| (Chloromethoxy)ethane                                                          | 22.69               | 22.49                |
| (Chloromethyl)benzene                                                          | 36.04               | 36.13                |
| (Chloromethyl)cyclopropane                                                     | 24.11               | 23.28                |
| (Chloromethyl)trichlorosilane                                                  | 34.1                | 34.12                |
| (Chloromethyl)trimethylsilane                                                  | 35.13               | 35.01                |
| (cis-2-Bromovinyl)benzene                                                      | 43.67               | 43.3                 |
| (Dichloromethyl)trichlorosilane                                                | 39.36               | 39.06                |
| (Diethylamino fluoro oxophosphorus)<br>(bis(diethylamino) oxophosphorus) oxide | 83.62               | 83.65                |

|                                                                                   |        |        |
|-----------------------------------------------------------------------------------|--------|--------|
| (Diethylamino fluoro oxophosphorus)<br>(bis(dimethylamino) oxophosphorus) oxide   | 65.42  | 65.29  |
| (Diethylamino fluoro oxophosphorus) (diethylamino<br>ethoxy oxophosphorus) oxide  | 72.15  | 72.36  |
| (Diethylamino fluoro thiophosphorus)<br>(bis(diethylamino) oxophosphorus) oxide   | 91.09  | 91.09  |
| (Diethylamino fluoro thiophosphorus) (diethylamino<br>fluoro oxophosphorus) oxide | 69.03  | 69.1   |
| (Diethylamino)acetonitrile                                                        | 33.19  | 33.53  |
| (Diethylamino)trimethylsilane                                                     | 47.33  | 47.09  |
| (Dimethylamino)acetonitrile                                                       | 24.07  | 24.35  |
| (E)-2-Undecenal                                                                   | 53.78  | 53.39  |
| (Ethoxy fluoro oxophosphorus) (diethoxy<br>oxophosphorus) oxide                   | 50.93  | 50.81  |
| (Ethoxymethyl)oxirane                                                             | 27.31  | 26.54  |
| (Ethylthio)benzene                                                                | 44.22  | 44.27  |
| (Fluoromethyl)benzene                                                             | 31.09  | 31.25  |
| (Iodomethyl)benzene                                                               | 44.94  | 44.21  |
| (Isopropylthio)benzene                                                            | 48.97  | 48.89  |
| (Methoxymethyl)oxirane                                                            | 23.11  | 21.88  |
| (Methylsulfonyl)ethene                                                            | 24.15  | 23.77  |
| (Methylthio)acetic acid                                                           | 25.35  | 25.34  |
| (Methylthio)ethene                                                                | 23.49  | 23.08  |
| (trans-1-Butenyl)benzene                                                          | 46.13  | 45.02  |
| (trans-2-Bromovinyl)benzene                                                       | 44.44  | 43.3   |
| (Trichloromethyl)oxirane                                                          | 30.33  | 30.31  |
| (Z) 9-Octadecen-1-ol                                                              | 86.72  | 86.69  |
| [1,1'-Bicyclopentyl]-2-one                                                        | 44.09  | 44.35  |
| 1-(1,1,2,2-Tetrafluoroethoxy)dodecane                                             | 70.11  | 69.41  |
| 1-(1,1,2,2-Tetrafluoroethoxy)octadecane                                           | 97.24  | 97.19  |
| 1-(1-Cyclohexen-1-yl)ethanone                                                     | 37.06  | 37.18  |
| 1-(1-Hydroxycyclohexyl)ethanone                                                   | 38.5   | 38.67  |
| 1-(2-Cyanoethyl)-3-(2-hydroxyethyl)-imidazolium<br>chloride                       | 51.06  | 50.4   |
| 1-(2-Cyanoethyl)-3-(2-propen-1-yl)-imidazolium<br>chloride                        | 53.46  | 53.31  |
| 1-(2-Cyanoethyl)-3-octylimidazolium 3-sulfobenzoate                               | 111.59 | 112.27 |
| 1-(2-Furanyl)-1-propanone                                                         | 33.91  | 33.28  |
| 1-(2-Furanyl)-2-propanone                                                         | 33.27  | 33.28  |
| 1-(2-Furyl)-2-ethyl-3-aminopropane                                                | 45.27  | 45.66  |
| 1-(2-Furyl)-2-ethyl-3-methylaminopropane                                          | 50.07  | 50.27  |
| 1-(2-Furyl)-2-ethyl-3-propanol                                                    | 43.51  | 43.64  |
| 1-(2-Furyl)-2-isopropyl-3-aminopropane                                            | 49.94  | 50.25  |

|                                                                             |       |       |
|-----------------------------------------------------------------------------|-------|-------|
| 1-(2-Furyl)-2-methyl-3-aminopropane                                         | 40.9  | 41.03 |
| 1-(2-Furyl)-2-methyl-3-methylaminopropane                                   | 45.38 | 45.64 |
| 1-(2-Furyl)-2-methyl-3-propanol                                             | 38.77 | 39.01 |
| 1-(2-Furyl)-2-oxa-4-butanol                                                 | 35.9  | 36.11 |
| 1-(2-Furyl)-2-oxa-4-butyl acetate                                           | 48.31 | 48.92 |
| 1-(2-Furyl)-2-oxa-4-pentanol                                                | 40.61 | 40.75 |
| 1-(2-Furyl)-2-oxa-4-pentyl acetate                                          | 53.21 | 53.56 |
| 1-(2-Furyl)-3-aminobutane                                                   | 40.78 | 41    |
| 1-(2-Furyl)-3-aminoheptane                                                  | 54.32 | 54.89 |
| 1-(2-Furyl)-3-aminohexane                                                   | 49.84 | 50.26 |
| 1-(2-Furyl)-3-aminononane                                                   | 63.47 | 64.15 |
| 1-(2-Furyl)-3-aminopentane                                                  | 45.27 | 45.63 |
| 1-(2-Furyl)-3-ethyl-1-penten-3-ol                                           | 53.23 | 52.69 |
| 1-(2-Furyl)-3-ethyl-3-pentanol                                              | 52.63 | 52.89 |
| 1-(2-Furyl)-3-methyl-1-penten-3-ol                                          | 48.3  | 48.06 |
| 1-(2-Furyl)-3-methyl-3-pentanol                                             | 47.84 | 48.26 |
| 1-(2-Furyl)-3-methylaminobutane                                             | 45.41 | 45.61 |
| 1-(2-Furyl)-3-methylaminopentane                                            | 49.81 | 50.24 |
| 1-(2-Furyl)-3-propanol                                                      | 34.73 | 34.42 |
| 1-(2-Hydroxy-4-methylphenyl)ethanone                                        | 43.62 | 42.81 |
| 1-(2-Hydroxy-5-methylphenyl)-1-propanone                                    | 48.18 | 47.44 |
| 1-(2-Hydroxyethyl)-3-methylimidazolium<br>perfluoropentanoate               | 62.3  | 61.37 |
| 1-(2-Methylphenyl)ethanone                                                  | 40.24 | 41.04 |
| 1-(2-Pyridinyl)ethanone                                                     | 34.21 | 34.1  |
| 1-(2-Tetrahydrofuryl)-3-aminobutane                                         | 42.13 | 42.1  |
| 1-(2-Tetrahydrofuryl)-3-butanone                                            | 38.62 | 39.01 |
| 1-(3-Cyanopropyl)-3-methylimidazolium<br>bis(trifluoromethylsulfonyl) amide | 74.64 | 74.84 |
| 1-(3-Cyanopropyl)-3-methylimidazolium dicyanamide                           | 56.96 | 57.4  |
| 1-(3-Cyanopropyl)-3-methylimidazolium<br>tetrafluoroborate                  | 46.88 | 47.62 |
| 1-(3-Cyanopropyl)-pyridinium<br>bis(trifluoromethylsulfonyl) amide          | 75.74 | 76.04 |
| 1-(3-Cyanopropyl)-pyridinium dicyanamide                                    | 57.75 | 58.6  |
| 1(3H)-Isobenzofuranone                                                      | 35.95 | 35.75 |
| 1-(3-Methylphenyl)ethanone                                                  | 40.97 | 41.04 |
| 1-(4-Isopropylphenyl)ethanone                                               | 50.85 | 50.26 |
| 1-(4-Methylphenyl)-1-propanone                                              | 45.96 | 45.67 |
| 1-(4-Methylphenyl)ethanol                                                   | 43.14 | 42.19 |
| 1-(Bromomethoxy)-2-methylbutane                                             | 40.89 | 40.49 |
| 1-(Bromomethoxy)-2-methylpropane                                            | 35.65 | 35.86 |

|                                         |        |        |
|-----------------------------------------|--------|--------|
| 1-(Bromomethoxy)-3-methylbutane         | 40.42  | 40.49  |
| 1-(Bromomethyl)-2-methylbenzene         | 44.15  | 43.88  |
| 1-(Bromomethyl)-3-methylbenzene         | 44.03  | 43.88  |
| 1-(Chloromethoxy)propane                | 27.36  | 27.12  |
| 1-(Chloromethyl)-2-fluorobenzene        | 35.85  | 36.03  |
| 1-(Chloromethyl)-2-methylbenzene        | 41.57  | 40.94  |
| 1-(Chloromethyl)-3-methylbenzene        | 41.11  | 40.94  |
| 1-(Chloromethyl)-4-fluorobenzene        | 35.79  | 36.03  |
| 1-(Chloromethyl)-4-methylbenzene        | 41.84  | 40.94  |
| 1-(Chloromethyl)naphthalene             | 53.74  | 54.09  |
| 1-(Dimethylamino)-2-propanol            | 31.15  | 30.61  |
| 1,1,1,2,3,3,3-Heptachloropropane        | 50.14  | 50.23  |
| 1,1,1,2-Tetrachloroacetone              | 35.29  | 35.82  |
| 1,1,1,2-Tetrachloroethane               | 31.07  | 30.92  |
| 1,1,1,2-Tetrachloropropane              | 35.49  | 35.51  |
| 1,1,1,3,3,3-Hexafluoro-2-methoxypropane | 23.29  | 22.89  |
| 1,1,1,3,5,5,5-Heptamethyltrisiloxane    | 63.17  | 63.24  |
| 1,1,1,3,5,7,7,7-Octamethyltetrasiloxane | 77.46  | 77.53  |
| 1,1,1,3-Tetrachloropropane              | 35.77  | 35.55  |
| 1,1,1-Bromodichloroethane               | 29.02  | 28.93  |
| 1,1,1-Chlorodifluoro-2-iodoethane       | 28.92  | 29.25  |
| 1,1,1-Chlorodifluoro-4-iodobutane       | 38.58  | 38.51  |
| 1,1,1-Tributoxypropane                  | 75.89  | 75.86  |
| 1,1,1-Trichloroacetone                  | 31.01  | 31.02  |
| 1,1,1-Trichlorotrifluoroethane          | 26.26  | 26.4   |
| 1,1,1-Triethoxyethane                   | 44.26  | 43.45  |
| 1,1,1-Triethoxypropane                  | 48.27  | 48.08  |
| 1,1,1-Trifluoro-2-iodoethane            | 23.94  | 24.56  |
| 1,1,1-Trifluoro-2-propanol              | 17.56  | 17.73  |
| 1,1,1-Trifluoroethane                   | 11.1   | 11.68  |
| 1,1,1-Trihexoxypropane                  | 103.3  | 103.64 |
| 1,1,1-Trimethoxyethane                  | 29.9   | 29.47  |
| 1,1,1-Trioctyloxypropane                | 130.96 | 131.42 |
| 1,1,1-Tripropoxypropane                 | 61.26  | 61.97  |
| 1,1,2,2,3-Pentachloropropane            | 39.61  | 40.12  |
| 1,1,2,2-Tetrabromobutane                | 51.08  | 51.55  |
| 1,1,2,2-Tetrabromoethane                | 41.75  | 41.96  |
| 1,1,2,2-Tetrachloro-1,2-difluoroethane  | 30.9   | 30.78  |
| 1,1,2,2-Tetrachloro-1-fluoroethane      | 31.54  | 30.75  |
| 1,1,2,2-Tetrachloroethane               | 30.63  | 30.72  |
| 1,1,2,2-Tetrachlorohexane               | 49.27  | 49.21  |
| 1,1,2,2-Tetra-t-butylethane             | 85.27  | 85.32  |

|                                              |        |       |
|----------------------------------------------|--------|-------|
| 1,1,2,3,3-Pentachloro-1-propene              | 40.65  | 40.11 |
| 1,1,2,3-Tetrachloropropane                   | 35.58  | 35.25 |
| 1,1,2-Tribromobutane                         | 43.83  | 43.73 |
| 1,1,2-Tribromoethane                         | 34.51  | 34.42 |
| 1,1,2-Tribromopropane                        | 39.63  | 39.1  |
| 1,1,2-Trichloroethane                        | 25.92  | 25.86 |
| 1,1,2-Trimethylcyclohexane                   | 41.63  | 41.61 |
| 1,1,2-Trimethylcyclopentane                  | 37.06  | 36.98 |
| 1,1,2-Trimethylcyclopropane                  | 28.69  | 27.72 |
| 1,1,3,3-Tetramethoxypropane                  | 40.64  | 40.87 |
| 1,1,3,3-Tetramethyl-1,3-diphenyldisiloxane   | 88.87  | 88.71 |
| 1,1,3,3-Tetramethylcyclopentane              | 42.1   | 41.63 |
| 1,1,3,3-Tetramethyldisiloxane                | 40.19  | 40.23 |
| 1,1,3,3-Tetramethylguanidinium butanoate     | 56.23  | 56.13 |
| 1,1,3,3-Tetramethylguanidinium heptanoate    | 70.63  | 70.02 |
| 1,1,3,3-Tetramethylguanidinium hexanoate     | 64.74  | 65.39 |
| 1,1,3,3-Tetramethylguanidinium octanoate     | 74.36  | 74.65 |
| 1,1,3,3-Tetramethylguanidinium pentanoate    | 60.85  | 60.76 |
| 1,1,3,5,7,9-Hexaethoxydecane                 | 112.77 | 112.7 |
| 1,1,3,5,7-Pentaethoxyoctane                  | 93.23  | 92.81 |
| 1,1,3,5-Tetraethoxy-5-methylhexane           | 78     | 78.15 |
| 1,1,3-Trichloropropane                       | 30.44  | 30.49 |
| 1,1,3-Trimethylcyclopentane                  | 37.52  | 36.98 |
| 1,10-Decanediol bis(perfluorobutyrate)       | 91.67  | 91.06 |
| 1,10-Decanedithiol                           | 63.82  | 63.78 |
| 1,10-Dichlorodecane                          | 58.01  | 58.04 |
| 1,10-Undecadiyne                             | 48.97  | 48.99 |
| 1,11-Undecanedithiol                         | 68.4   | 68.41 |
| 1,13-Tridecanedioic acid                     | 65.39  | 65.53 |
| 1,14-Tetradecanedioic acid                   | 70.03  | 70.16 |
| 1,1-Bis(butylthio)ethane                     | 64.33  | 64.22 |
| 1,1-Bis(ethoxycarbonyl)-2-methylcyclopentane | 58.54  | 59    |
| 1,1-Bis(ethylthio)-2-butyne                  | 52.81  | 53.46 |
| 1,1-Bis(ethylthio)ethane                     | 45.74  | 45.7  |
| 1,1-Bis(ethylthio)propane                    | 54.72  | 54.96 |
| 1,1-Bis(isobutylthio)ethane                  | 64.04  | 64.14 |
| 1,1-Bis(isopropylthio)ethane                 | 55.02  | 54.94 |
| 1,1-Bis(methoxycarbonyl)cyclohexane          | 49.16  | 49.72 |
| 1,1-Bis(methylthio)-cyclohexane              | 52.54  | 52.7  |
| 1,1-Bis(methylthio)propane                   | 41.43  | 40.65 |
| 1,1-Bis(propylthio)ethane                    | 54.52  | 54.96 |
| 1,1-Cyclohexanedithiol                       | 43.22  | 43.36 |

|                                    |       |       |
|------------------------------------|-------|-------|
| 1,1-Di(2-chloroethoxy)ethane       | 43.05 | 42.74 |
| 1,1-Dibromo-1-butene               | 35.26 | 35.62 |
| 1,1-Dibromo-1-heptene              | 49.84 | 49.51 |
| 1,1-Dibromo-1-hexene               | 44.72 | 44.88 |
| 1,1-Dibromo-1-octene               | 54.76 | 54.14 |
| 1,1-Dibromo-1-pentene              | 40.05 | 40.25 |
| 1,1-Dibromo-1-propene              | 30.98 | 30.99 |
| 1,1-Dibromobutane                  | 35.53 | 35.94 |
| 1,1-Dibromoethane                  | 26.83 | 26.68 |
| 1,1-Dibromopropane                 | 30.47 | 31.31 |
| 1,1-Dibutylhydrazine               | 46.51 | 46.44 |
| 1,1-Dichloro-1,3-butadiene         | 30.69 | 29.85 |
| 1,1-Dichloro-1-fluoroethane        | 20.65 | 21.09 |
| 1,1-Dichloro-2,2-difluoroethane    | 20.24 | 20.95 |
| 1,1-Dichloro-2-fluoropropene       | 25.03 | 25.43 |
| 1,1-Dichloro-2-methylpropane       | 29.79 | 30.28 |
| 1,1-Dichloro-3,3-dimethylbutane    | 39.74 | 39.56 |
| 1,1-Dichloro-3,3-dimethylpentane   | 44.03 | 44.19 |
| 1,1-Dichlorobutane                 | 30.54 | 30.32 |
| 1,1-Dichlorocyclohexane            | 37.63 | 37.41 |
| 1,1-Dichloroethane                 | 21.14 | 21.06 |
| 1,1-Dichloropropane                | 25.72 | 25.69 |
| 1,1-Dichloropropene                | 24.8  | 25.53 |
| 1,1-Diethoxycyclohexane            | 48.67 | 49.41 |
| 1,1-Diethoxycyclopentane           | 44.62 | 44.78 |
| 1,1-Diethoxyethane                 | 33.43 | 33.14 |
| 1,1-Diethoxypentane                | 47.16 | 47.03 |
| 1,1-Diethoxypropane                | 38.2  | 37.77 |
| 1,1-Diethylhydrazine               | 27.95 | 27.92 |
| 1,1-Difluoro-1,2,2-trichloroethane | 25.93 | 26.03 |
| 1,1-Difluoro-1-ethoxy-2-iodoethane | 35.49 | 36.1  |
| 1,1-Dimethoxyhexadecane            | 88.1  | 88.64 |
| 1,1-Dimethylbutyl acetate          | 40.33 | 40.88 |
| 1,1-Dimethylcyclohexane            | 37.05 | 37.02 |
| 1,1-Dimethylcyclopentane           | 32.69 | 32.39 |
| 1,1-Dimethylcyclopropane           | 23.84 | 23.13 |
| 1,1-Dimethylhydrazine              | 18.72 | 18.74 |
| 1,1-Dimethylindane                 | 47.87 | 47.87 |
| 1,1-Dimethylpropargylamine         | 26.82 | 26.61 |
| 1,1-Dipentylhydrazine              | 55.76 | 55.7  |
| 1,1-Diphenylbutane                 | 69.14 | 69.74 |
| 1,1-Diphenylethane                 | 60.3  | 60.48 |

|                                                             |       |       |
|-------------------------------------------------------------|-------|-------|
| 1,1-Diphenylethylene                                        | 60.96 | 60.28 |
| 1,1-Dipropoxyethane                                         | 42.37 | 42.4  |
| 1,1-Dipropylhydrazine                                       | 37.26 | 37.18 |
| 1,1-Ethanediol diacetate                                    | 33    | 33.26 |
| 1,1-Propanedithiol                                          | 35.71 | 35.94 |
| 1,2,2,3-Tetrabromobutane                                    | 51.42 | 51.8  |
| 1,2,2,3-Tetrachloropropane                                  | 35.3  | 35.26 |
| 1,2,2-Tribromobutane                                        | 44.46 | 44.01 |
| 1,2,2-Tribromopropane                                       | 39.91 | 39.38 |
| 1,2,2-Trichloropropane                                      | 30.69 | 30.46 |
| 1,2,2-Trimethylpropylacetate                                | 40.85 | 40.92 |
| 1,2,2-Tris(butylthio)-propane                               | 95.36 | 95.59 |
| 1,2,2-Tris(isobutylthio)-propane                            | 94.97 | 95.47 |
| 1,2,2-Tris(isopropylthio)-propane                           | 81.22 | 81.67 |
| 1,2,2-Tris(propylthio)-propane                              | 81.66 | 81.7  |
| 1,2,3,4,5,6,7,8-Octahydroanthracene                         | 59.98 | 60    |
| 1,2,3,4-Tetrachloro-5,5-dimethoxy-1,3-cyclopentadiene       | 54.16 | 54.74 |
| 1,2,3,4-Tetrachlorobutadiene                                | 40.04 | 39.48 |
| 1,2,3,4-Tetrafluorobenzene                                  | 25.4  | 26.12 |
| 1,2,3,4-Tetrahydro-1,1,6-trimethylnaphthalene               | 57.48 | 57.31 |
| 1,2,3,4-Tetrahydro-1,5-dimethylnaphthalene                  | 52.28 | 52.66 |
| 1,2,3,4-Tetrahydro-6-methylnaphthalene                      | 47.79 | 48.07 |
| 1,2,3,4-Tetrahydroisoquinoline                              | 40.87 | 42    |
| 1,2,3,4-Tetrahydronaphthalene                               | 43.09 | 43.26 |
| 1,2,3,4-Tetrahydroquinoline                                 | 43.4  | 42.76 |
| 1,2,3,4-Tetramethylcyclohexane                              | 46.14 | 46.14 |
| 1,2,3,5-Tetramethylbenzene                                  | 45.31 | 45.76 |
| 1,2,3-Propanetriol                                          | 20.54 | 20.27 |
| 1,2,3-Tribromobutane                                        | 44.03 | 43.98 |
| 1,2,3-Tribromopropane                                       | 38.94 | 39.3  |
| 1,2,3-Trichloro-1,1,2,3,3-pentafluoropropane                | 30.81 | 30.94 |
| 1,2,3-Trichloropropane                                      | 30.43 | 30.39 |
| 1,2,3-Trichloropropene                                      | 30.44 | 30.24 |
| 1,2,3-Trimethylindene                                       | 52.06 | 52.42 |
| 1,2,4,5-Tetrafluorobenzene                                  | 25.95 | 26.12 |
| 1,2,4,5-Tetramethylbenzene                                  | 45.42 | 45.76 |
| 1,2,4a,5,8,8a-Hexahydro-4,7-dimethyl-1-isopropylnaphthalene | 65.77 | 66.89 |
| 1,2,4-Tribromobutane                                        | 43.98 | 43.93 |
| 1,2,4-Trichlorobenzene                                      | 40.9  | 40.98 |
| 1,2,4-Triethylbenzene                                       | 54.84 | 54.84 |
| 1,2,4-Trifluorobenzene                                      | 26.29 | 26.22 |

|                                                 |        |        |
|-------------------------------------------------|--------|--------|
| 1,2,4-Triisopropylbenzene                       | 68.86  | 68.61  |
| 1,2,4-Trimethyl-5-hexadecylbenzene              | 114.97 | 115.21 |
| 1,2,4-Trimethyl-5-hexadecylcyclohexane          | 115.26 | 115.59 |
| 1,2,4-Trimethylbenzene                          | 40.69  | 40.95  |
| 1,2,5,6-Tetrahydropyridine                      | 25.92  | 26.32  |
| 1,2,5-Trimethylpyrrole                          | 34.98  | 35.05  |
| 1,2-Benzopyran                                  | 40.4   | 40.17  |
| 1,2-Bis(1,1,2,2-tetrafluoroethoxy)ethane        | 35.33  | 34.82  |
| 1,2-Bis(2-chloroethoxy)ethane                   | 42.81  | 42.9   |
| 1,2-Bis(dimethylamino)ethane                    | 38.02  | 37.72  |
| 1,2-Bis(dipentylborinoxy)ethane                 | 116.12 | 116.1  |
| 1,2-Bis(tributylsilyl)acetylene                 | 138.06 | 138.22 |
| 1,2-Bis(triethylsilyl)ethane                    | 85.59  | 85.82  |
| 1,2-Bis(trimethylsilyl)acetylene                | 55.18  | 55.24  |
| 1,2-Butadiene                                   | 20.27  | 20.62  |
| 1,2-Butanediol                                  | 23.59  | 23.49  |
| 1,2-Cycloheptanedione                           | 33.19  | 32.95  |
| 1,2-Cyclohexanedione                            | 29.46  | 28.32  |
| 1,2-Diaminobenzene                              | 34.81  | 34.66  |
| 1,2-Dibromo-1,1-difluoroethane                  | 26.82  | 26.85  |
| 1,2-Dibromo-1,3,4,4-tetrachlorobutane           | 55.21  | 55.35  |
| 1,2-Dibromo-2-methylpropane                     | 36.34  | 36.3   |
| 1,2-Dibromo-4,4-dimethylhexane                  | 54.5   | 54.69  |
| 1,2-Dibromo-4,4-dimethylpentane                 | 50.2   | 50.06  |
| 1,2-Dibromobenzene                              | 41.52  | 41.7   |
| 1,2-Dibromoethane                               | 27     | 26.88  |
| 1,2-Dibromoheptane                              | 50.18  | 50.08  |
| 1,2-Dibromohexane                               | 45.68  | 45.45  |
| 1,2-Dibromopentane                              | 41.16  | 40.82  |
| 1,2-Dibromopropane                              | 31.77  | 31.56  |
| 1,2-Dibromotetrafluoroethane                    | 26.75  | 26.82  |
| 1,2-Dibutoxyethane                              | 52.04  | 51.82  |
| 1,2-Dichloro-1,1-difluoroethane                 | 21.13  | 21.17  |
| 1,2-Dichloro-1,2-difluoroethane                 | 21.13  | 21.22  |
| 1,2-Dichloro-1,3-butadiene                      | 29.96  | 29.76  |
| 1,2-Dichloro-1-fluoroethane                     | 21.12  | 21.11  |
| 1,2-Dichloro-2-methylpropane                    | 30.44  | 30.37  |
| 1,2-Dichloro-3,3,4,4,5,5-hexafluorocyclopentene | 33.29  | 33.93  |
| 1,2-Dichloro-3,4-dimethylpentane                | 44.2   | 44.03  |
| 1,2-Dichloro-4-(trichloromethyl)benzene         | 55.96  | 55.69  |
| 1,2-Dichloro-4,4-dimethylhexane                 | 48.49  | 48.72  |
| 1,2-Dichlorobenzene                             | 35.94  | 36.16  |



|                                     |       |       |
|-------------------------------------|-------|-------|
| 1,2-Dichlorobutane                  | 30.41 | 30.22 |
| 1,2-Dichlorohexafluoropropane       | 26.54 | 26.25 |
| 1,2-Dichloronaphthalene             | 53.59 | 54.12 |
| 1,2-Dichloropentane                 | 34.76 | 34.85 |
| 1,2-Dichloropropane                 | 25.73 | 25.59 |
| 1,2-Diethoxybenzene                 | 49.21 | 48.88 |
| 1,2-Diethylbenzene                  | 45.13 | 45.4  |
| 1,2-Diethylhydrazine                | 28.01 | 27.78 |
| 1,2-Diethylpyridinium ethylsulfate  | 64.48 | 64.43 |
| 1,2-Difluorobenzene                 | 26.19 | 26.32 |
| 1,2-Dihydronaphthalene              | 43.53 | 43.06 |
| 1,2-Diiodobenzene                   | 51.18 | 51.66 |
| 1,2-Diisobutylhydrazine             | 46.34 | 46.22 |
| 1,2-Diisopropylbenzene              | 54.48 | 54.58 |
| 1,2-Diisopropylhydrazine            | 37.04 | 36.9  |
| 1,2-Dimethoxy-4-allylbenzene        | 53.29 | 53.32 |
| 1,2-Dimethyl-3-nitrobenzene         | 41.86 | 42.81 |
| 1,2-Dimethyl-5-propylpyrrole        | 44.55 | 44.31 |
| 1,2-Dimethyl-5-propylpyrrolidine    | 45.01 | 45.39 |
| 1,2-Dimethylbenzene                 | 35.81 | 36.14 |
| 1,2-Dimethylcyclohexene             | 36.86 | 36.98 |
| 1,2-Dimethylcyclopentene            | 32.27 | 32.35 |
| 1,2-Dimethylenecyclohexane          | 36.22 | 36.56 |
| 1,2-Dimethylhydrazine               | 18.42 | 18.6  |
| 1,2-Dimethylnaphthalene             | 53.68 | 54.1  |
| 1,2-Dimethylpiperidine              | 36.17 | 36.2  |
| 1,2-Dimethylpropylamine             | 28.49 | 28.61 |
| 1,2-Dinitroethane                   | 21.97 | 22.88 |
| 1,2-Diphenylbutane                  | 69.83 | 69.74 |
| 1,2-Dipiperidinoethane              | 61.46 | 61.06 |
| 1,2-Dipropoxyethane                 | 42.77 | 42.56 |
| 1,2-Dis(trimethylsilyl)-ethylene    | 58.5  | 58.06 |
| 1,2-Epoxy-4-(epoxyethyl)cyclohexane | 36.23 | 36.13 |
| 1,2-Ethanediol                      | 14.45 | 14.22 |
| 1,2-Ethanediol dinitrate            | 26.47 | 26.64 |
| 1,2-Ethanedithiol                   | 27.04 | 26.74 |
| 1,2-Oxathiane 2,2-dioxide           | 28.23 | 28.04 |
| 1,2-Pentadiene                      | 24.94 | 25.25 |
| 1,2-Pentanediol                     | 28.21 | 28.12 |
| 1,2-Propanediol                     | 19.07 | 18.86 |
| 1,2-Propanediol diacetate           | 38.06 | 38.06 |
| 1,2-Propanediolsulfite              | 24.69 | 25.21 |

|                                                                           |        |        |
|---------------------------------------------------------------------------|--------|--------|
| 1,3,4,4-Tetrachloro-1-butene                                              | 39.75  | 39.57  |
| 1,3,4,5,6,6-Hexachloro-1-hexene                                           | 58.18  | 58.35  |
| 1,3,5-Cycloheptatriene                                                    | 32.29  | 31.81  |
| 1,3,5-Cyclooctatriene                                                     | 35.84  | 36.44  |
| 1,3,5-Tributylborazine                                                    | 79.59  | 79.86  |
| 1,3,5-Triethylbenzene                                                     | 55.01  | 54.84  |
| 1,3,5-Triethylborazine                                                    | 52.48  | 52.08  |
| 1,3,5-Trifluorobenzene                                                    | 25.85  | 26.22  |
| 1,3,5-Triisopropylbenzene                                                 | 68.93  | 68.61  |
| 1,3,5-Trimethyl-1H-pyrazole                                               | 32.48  | 32.81  |
| 1,3,5-Trimethyladamantane                                                 | 56.84  | 55.81  |
| 1,3,5-Trimethylbenzene                                                    | 40.99  | 40.95  |
| 1,3,5-Trisilacyclohexane                                                  | 43.69  | 43.44  |
| 1,3,6-Tricyanohexane                                                      | 42.93  | 43.14  |
| 1,3-Benzodioxole                                                          | 32.27  | 32.63  |
| 1,3-Bis(1-methyl-4-piperidyl)propane                                      | 75.63  | 74.87  |
| 1,3-Bis(1-methylethenyl)benzene                                           | 55.07  | 54.18  |
| 1,3-Bis(bromomethyl)tetramethyldisiloxane                                 | 64.41  | 64.45  |
| 1,3-Bis(chloromethyl)tetramethyldisiloxane                                | 58.3   | 58.31  |
| 1,3-Bis(dibutoxyboryl)propane                                             | 104.73 | 104.83 |
| 1,3-Bis(dichloroboryl)propane                                             | 44.12  | 44.25  |
| 1,3-Bis(dichloromethyl)tetramethyldisiloxane                              | 68.07  | 68.19  |
| 1,3-Bis(dimethoxyboryl)propane                                            | 48.96  | 49.15  |
| 1,3-Bis(dimethylamino)-2-propanol                                         | 44.01  | 43.77  |
| 1,3-Bis(trifluoromethyl)benzene                                           | 36.94  | 36.7   |
| 1,3-Bis(trimethylsiloxy)benzene                                           | 75.39  | 75.18  |
| 1,3-Butanediol dinitrate                                                  | 35.55  | 35.91  |
| 1,3-Butanediolsulfite                                                     | 30.31  | 29.84  |
| 1,3-Butyleneglycol                                                        | 23.63  | 23.49  |
| 1,3-Cycloheptadiene                                                       | 31.79  | 32.01  |
| 1,3-Cyclohexadiene                                                        | 26.87  | 27.38  |
| 1,3-Cyclohexanedione                                                      | 28.15  | 28.32  |
| 1,3-Di(4-methylpentyl)-1,3-diphospha-2,4-dithiacyclobutane 1,3-dithioxide | 106.96 | 107.36 |
| 1,3-Diacetin                                                              | 39.34  | 39.47  |
| 1,3-Diaminobenzene                                                        | 33.95  | 34.66  |
| 1,3-Dibromo-1,1-dichloropropane                                           | 41.22  | 41.3   |
| 1,3-Dibromo-2,2-dimethylpropane                                           | 40.93  | 40.75  |
| 1,3-Dibromo-2-propanol                                                    | 32.47  | 32.93  |
| 1,3-Dibromobenzene                                                        | 41.8   | 41.7   |
| 1,3-Dibromobutane                                                         | 35.7   | 36.19  |
| 1,3-Dibromopropane                                                        | 31.18  | 31.51  |

|                                                                 |        |        |
|-----------------------------------------------------------------|--------|--------|
| 1,3-Dibromopropyne                                              | 29.61  | 29.63  |
| 1,3-Dichloro-2-propanol                                         | 27.31  | 27.05  |
| 1,3-Dichloro-2-propanol nitrate                                 | 32.57  | 33.26  |
| 1,3-Dichloroacetone                                             | 25.7   | 25.9   |
| 1,3-Dichlorobenzene                                             | 36.12  | 36.16  |
| 1,3-Dichlorobutane                                              | 30.27  | 30.22  |
| 1,3-Dichloropropane                                             | 25.54  | 25.63  |
| 1,3-Dichloro-trans-2-butene                                     | 30.17  | 30.18  |
| 1,3-Diethylbenzene                                              | 45.54  | 45.4   |
| 1,3-Diethylimidazolium bis(trifluoromethylsulfonyl) amide       | 70.29  | 70.38  |
| 1,3-Difluoro-2-propanol                                         | 17.63  | 17.29  |
| 1,3-Difluorobenzene                                             | 25.85  | 26.32  |
| 1,3-Difluoropropane                                             | 15.75  | 15.87  |
| 1,3-Dihexyl-1,3-diphospha-2,4-dithiacyclobutane 1,3-dithioxide  | 107.45 | 107.44 |
| 1,3-Diiodohexafluoropropane                                     | 42.17  | 42.03  |
| 1,3-Diiodopropane                                               | 41.58  | 41.79  |
| 1,3-Diisopropylbenzene                                          | 54.65  | 54.58  |
| 1,3-Dimethoxy-1-ethoxy-5-methyl-4-hexene                        | 57.25  | 57.8   |
| 1,3-Dimethoxybenzene                                            | 40.12  | 39.56  |
| 1,3-Dimethyl-1H-pyrazole                                        | 28.23  | 28.2   |
| 1,3-Dimethyl-2-oxo-hexahydro-pyrimidine                         | 34.84  | 34.48  |
| 1,3-Dimethyladamantane                                          | 51.57  | 51.16  |
| 1,3-Dimethylbenzene                                             | 36.15  | 36.14  |
| 1,3-Dimethylcyclohexene                                         | 36.99  | 36.87  |
| 1,3-Dimethylimidazolium bis(trifluoromethylsulfonyl) amide      | 60.56  | 61.2   |
| 1,3-Dimethylimidazolium methosulfate                            | 44.78  | 44.8   |
| 1,3-Dimethylnaphthalene                                         | 53.68  | 54.1   |
| 1,3-Dinitropropane                                              | 27.42  | 27.51  |
| 1,3-Dioxane                                                     | 21.52  | 21.68  |
| 1,3-Dioxolan-2-one                                              | 16.68  | 17.1   |
| 1,3-Dioxolane                                                   | 16.85  | 17.05  |
| 1,3-Dipentyl-1,3-diphospha-2,4-dithiacyclobutane 1,3-dithioxide | 98.52  | 98.18  |
| 1,3-Diphenyl-1-butene                                           | 70.32  | 69.54  |
| 1,3-Diphenylpropane                                             | 64.51  | 65.15  |
| 1,3-Dipropylimidazolium bis(trifluoromethylsulfonyl) amide      | 79.71  | 79.64  |
| 1,3-Dithiolane                                                  | 28.76  | 29.53  |
| 1,3-Divinyl-1,1,3,3-tetramethyldisiloxane                       | 57.23  | 57.33  |
| 1,3-Pentadiyne                                                  | 21.49  | 21.75  |

|                                  |       |       |
|----------------------------------|-------|-------|
| 1,3-Propanediamine               | 22.97 | 22.89 |
| 1,3-Propanediol                  | 19.02 | 18.85 |
| 1,3-Propanediol diacetate        | 37.82 | 38.05 |
| 1,4-Bis(3-aminopropoxy)butane    | 58.5  | 58.68 |
| 1,4-Bis(acetoxy)-2-butyne        | 40.91 | 41.18 |
| 1,4-Bis(butanoyloxy)-2-butyne    | 59.41 | 59.7  |
| 1,4-Bis(dichloroboryl)butane     | 48.79 | 48.88 |
| 1,4-Bis(diethoxyboryl)butane     | 73.12 | 72.42 |
| 1,4-Bis(formoxy)-2-butyne        | 31.79 | 32.18 |
| 1,4-Bis(heptanoyloxy)-2-butyne   | 87.33 | 87.48 |
| 1,4-Bis(hexanoyloxy)-2-butyne    | 78.01 | 78.22 |
| 1,4-Bis(propanoyloxy)-2-butyne   | 50.11 | 50.44 |
| 1,4-Bis(valeroyloxy)-2-butyne    | 68.69 | 68.96 |
| 1,4-Butanediol diacetate         | 42.52 | 42.68 |
| 1,4-Butanediol diglycidyl ether  | 50.46 | 50.94 |
| 1,4-Butanediol dimethacrylate    | 60.01 | 60.72 |
| 1,4-Butanedithiol                | 36.13 | 36    |
| 1,4-Cyclohexadiene               | 26.51 | 27.38 |
| 1,4-Diaminobenzene               | 34.81 | 34.66 |
| 1,4-Dibromo-2-butyne             | 35.41 | 34.64 |
| 1,4-Dibromobutane                | 35.88 | 36.14 |
| 1,4-Dibromopentane               | 41    | 40.82 |
| 1,4-Dichloro-2-butyne            | 29.03 | 28.76 |
| 1,4-Dichlorobenzene              | 36.31 | 36.16 |
| 1,4-Dichlorobutane               | 30.25 | 30.26 |
| 1,4-Dichloronaphthalene          | 53.45 | 54.12 |
| 1,4-Diethylbenzene               | 45.54 | 45.4  |
| 1,4-Difluorobenzene              | 25.81 | 26.32 |
| 1,4-Difluorobutane               | 20.37 | 20.5  |
| 1,4-Difluorooctachlorobutane     | 58.84 | 59.3  |
| 1,4-Dihydronaphthalene           | 42.26 | 43.06 |
| 1,4-Dihydroxybenzene             | 29.58 | 30.06 |
| 1,4-Diiodobutane                 | 46.24 | 46.42 |
| 1,4-Diisopropylbenzene           | 54.74 | 54.58 |
| 1,4-Dimethyl-2-nitrobenzene      | 41.98 | 42.81 |
| 1,4-Dimethyl-2-propylpyrrolidine | 45.19 | 45.42 |
| 1,4-Dimethylbenzene              | 36    | 36.14 |
| 1,4-Dimethylnaphthalene          | 53.47 | 54.1  |
| 1,4-Dimethylpiperazine           | 35.5  | 35.5  |
| 1,4-Dioxane                      | 21.68 | 21.9  |
| 1,4-Dioxatetralin                | 36.67 | 37.48 |
| 1,4-Divinylbenzene               | 45.81 | 44.78 |

|                                             |        |        |
|---------------------------------------------|--------|--------|
| 1,4-Oxathiane                               | 27.77  | 28.13  |
| 1,4-Pentadien-3-ol                          | 25.78  | 26.09  |
| 1,4-Pentadiene                              | 24.37  | 24.67  |
| 1,4-Pentanediol                             | 28.06  | 28.12  |
| 1,4-Piperazinedipropanamine                 | 60.71  | 60.8   |
| 1,5-Bis(diethoxyboryl)pentane               | 77.13  | 77.05  |
| 1,5-Diazabicyclo[4.3.0]non-5-ene            | 37.51  | 37.27  |
| 1,5-Dibromoheptane                          | 49.89  | 50.08  |
| 1,5-Dibromopentane                          | 40.64  | 40.77  |
| 1,5-Dibromoundecane                         | 69.46  | 68.6   |
| 1,5-Dichloropentane                         | 34.89  | 34.89  |
| 1,5-Difluoropentane                         | 25.04  | 25.13  |
| 1,5-Diiodopentane                           | 51     | 51.05  |
| 1,5-Dimethylcyclopentene                    | 32.05  | 32.24  |
| 1,5-Hexadiene                               | 29.22  | 29.3   |
| 1,5-Hexadiyne                               | 25.48  | 25.84  |
| 1,5-Pentanediamine                          | 32.24  | 32.15  |
| 1,5-Pentanediol                             | 28.2   | 28.11  |
| 1,5-Pentanediol diacetate                   | 46.85  | 47.31  |
| 1,5-Pentanedithiol                          | 40.74  | 40.63  |
| 1,6-Bis(diethoxyboryl)hexane                | 81.81  | 81.68  |
| 1,6-Dibromohexane                           | 45.19  | 45.4   |
| 1,6-Dichlorohexane                          | 39.45  | 39.52  |
| 1,6-Difluorohexane                          | 29.65  | 29.76  |
| 1,6-Diiodohexane                            | 55.58  | 55.68  |
| 1,6-Dimethyl-4-isopropyl-naphthalene        | 68.13  | 68.13  |
| 1,6-Dimethylnaphthalene                     | 54.52  | 54.1   |
| 1,6-Heptadiyne                              | 30.39  | 30.47  |
| 1,6-Hexamethylene diisocyanate              | 43.63  | 44.08  |
| 1,6-Hexanedioic acid                        | 32.97  | 33.12  |
| 1,6-Hexanediol bis(6-H-perfluoroheptanoate) | 101.76 | 101.82 |
| 1,6-Hexanediol bis(perfluorobutyrate)       | 73.03  | 72.54  |
| 1,6-Hexanediol bis(perfluorooctanoate)      | 112.55 | 112.62 |
| 1,6-Hexanedithiol                           | 45.3   | 45.26  |
| 1,7-Dibromo-3,3-dichloroheptane             | 59.56  | 59.66  |
| 1,7-Dibromoheptane                          | 49.86  | 50.03  |
| 1,7-Dichloroheptane                         | 44.21  | 44.15  |
| 1,7-Dichloronaphthalene                     | 54.12  | 54.12  |
| 1,7-Dimethylnaphthalene                     | 53.43  | 54.1   |
| 1,7-Heptanediol                             | 37.27  | 37.37  |
| 1,7-Heptanedithiol                          | 49.37  | 49.89  |
| 1,7-Octadiene                               | 38.35  | 38.56  |

|                                                                    |        |        |
|--------------------------------------------------------------------|--------|--------|
| 1,7-Octadiyne                                                      | 35.07  | 35.1   |
| 1,8-Cineole                                                        | 45.47  | 45.71  |
| 1,8-Diaminonaphthalene                                             | 53.24  | 52.62  |
| 1,8-Dibromooctane                                                  | 54.55  | 54.66  |
| 1,8-Dichloronaphthalene                                            | 53.81  | 54.12  |
| 1,8-Dichlorooctane                                                 | 48.68  | 48.78  |
| 1,8-Nonadiene                                                      | 42.74  | 43.19  |
| 1,8-Nonadiyne                                                      | 39.52  | 39.73  |
| 1,8-Octanedithiol                                                  | 54.61  | 54.52  |
| 1,9-Decadiene                                                      | 47.86  | 47.82  |
| 1,9-Dichlorononane                                                 | 52.94  | 53.41  |
| 1,9-Nonanedithiol                                                  | 58.89  | 59.15  |
| 1-[(2-Aminoethyl)amino]-2-propanol                                 | 33.75  | 33.51  |
| 10,11-Dipropyleicosane                                             | 121.98 | 122.44 |
| 10-Chloro-1-decanol                                                | 54.59  | 54.65  |
| 10-Undecen-1-ol                                                    | 53.87  | 54.17  |
| 10-Undecenoic acid                                                 | 54.44  | 54.36  |
| 10-Undecenoyl chloride                                             | 58.16  | 58.22  |
| 11,12-Dipropyldocosane                                             | 131.82 | 131.7  |
| 11-Butyldocosane                                                   | 122.54 | 122.48 |
| 11-Decylheneicosane                                                | 145.76 | 145.63 |
| 12-Tricosanone                                                     | 107.81 | 108.9  |
| 1a,2a,4b-1,2,4-Trimethylcyclopentane                               | 37.3   | 36.92  |
| 1a,2b,4a-1,2,4-Trimethylcyclopentane                               | 37.47  | 36.92  |
| 1-Acetoxy-2-ethyl-3-(2-furyl)propane                               | 52.79  | 53.24  |
| 1-Acetoxy-2-ethyl-4-oxoheptane                                     | 54.48  | 55.05  |
| 1-Acetoxy-2-methyl-3-(2-furyl)propane                              | 48.21  | 48.61  |
| 1-Acetoxy-2-methyl-4-oxoheptane                                    | 50     | 50.42  |
| 1-Acetoxy-3-(2-furyl)propane                                       | 43.8   | 44.02  |
| 1-Acetoxy-3-oxa-5-oxooctane                                        | 47.29  | 47.52  |
| 1-Acetoxy-4-ethyl-3-oxa-5-oxooctane                                | 56.39  | 56.79  |
| 1-Acetoxy-4-oxoheptane                                             | 45.47  | 45.83  |
| 1-Acetyl-3-methylpiperidine                                        | 40.91  | 40.76  |
| 1-Acetyl-4-piperidinone                                            | 36.39  | 36.44  |
| 1-Acetylnaphthalene                                                | 54.12  | 54.19  |
| 1-Acetylpiperidine                                                 | 35.67  | 36.17  |
| 1-Allylcyclohexanol                                                | 42.31  | 42.72  |
| 1-Amino-3-methoxypropane                                           | 26.87  | 25.75  |
| 1-Benzosuberone                                                    | 48.66  | 48.16  |
| 1-Benzyl-3-methylimidazolium<br>bis(trifluoromethylsulfonyl) amide | 85.86  | 85.72  |
| 1-Benzylpiperidine                                                 | 55.6   | 56.16  |

|                                        |       |       |
|----------------------------------------|-------|-------|
| 1-Benzylpyrrole                        | 50.33 | 50.35 |
| 1-Bromo-1,1,5-trichloropentane         | 47.61 | 47.62 |
| 1-Bromo-1-chloroethane                 | 23.83 | 23.88 |
| 1-Bromo-1-chloropropane                | 28.53 | 28.51 |
| 1-Bromo-1-pentyne                      | 31.31 | 31.15 |
| 1-Bromo-2-(trifluoromethyl)benzene     | 38.81 | 39.2  |
| 1-Bromo-2,2-dimethylpropane            | 32.99 | 33.01 |
| 1-Bromo-2,4-dimethylbenzene            | 43.94 | 43.73 |
| 1-Bromo-2,5-dimethylbenzene            | 43.5  | 43.73 |
| 1-Bromo-2-butene                       | 28.8  | 28.2  |
| 1-Bromo-2-butoxyethylene               | 38.92 | 38.56 |
| 1-Bromo-2-chloro-1,1,2-trifluoroethane | 24.26 | 24.02 |
| 1-Bromo-2-chloroethane                 | 23.87 | 23.94 |
| 1-Bromo-2-chloropropane                | 28.93 | 28.53 |
| 1-Bromo-2-ethoxyethane                 | 29.38 | 30.09 |
| 1-Bromo-2-ethoxyethylene               | 29.73 | 29.3  |
| 1-Bromo-2-ethylbenzene                 | 43.33 | 43.55 |
| 1-Bromo-2-fluorobenzene                | 33.96 | 34.01 |
| 1-Bromo-2-fluoroethane                 | 18.99 | 19.06 |
| 1-Bromo-2-isopropylacetylene           | 31    | 31.11 |
| 1-Bromo-2-methoxyethane                | 25.42 | 25.43 |
| 1-Bromo-2-methylbutane                 | 32.95 | 32.99 |
| 1-Bromo-2-methylpentane                | 38.13 | 37.62 |
| 1-Bromo-2-propanol                     | 25.34 | 25.19 |
| 1-Bromo-2-t-butylacetylene             | 35.69 | 35.76 |
| 1-Bromo-2-vinylbenzene                 | 43.79 | 43.24 |
| 1-Bromo-3-(trifluoromethyl)benzene     | 39.04 | 39.2  |
| 1-Bromo-3,3-dichlorobutane             | 38    | 38.03 |
| 1-Bromo-3,4-dimethylbenzene            | 43.2  | 43.73 |
| 1-Bromo-3,5-dimethylbenzene            | 43.04 | 43.73 |
| 1-Bromo-3-chloropropane                | 28.33 | 28.57 |
| 1-Bromo-3-ethylbenzene                 | 43.46 | 43.55 |
| 1-Bromo-3-fluorobenzene                | 34.26 | 34.01 |
| 1-Bromo-3-fluoropropane                | 23.6  | 23.69 |
| 1-Bromo-3-methyl-2-butene              | 33.5  | 32.9  |
| 1-Bromo-3-methylcyclohexane            | 40.94 | 40.16 |
| 1-Bromo-3-vinylbenzene                 | 44.14 | 43.24 |
| 1-Bromo-4-(hexyloxy)benzene            | 64.17 | 63.81 |
| 1-Bromo-4-(trifluoromethyl)benzene     | 39.1  | 39.2  |
| 1-Bromo-4-chlorobenzene                | 38.88 | 38.93 |
| 1-Bromo-4-chlorobutane                 | 33.21 | 33.2  |
| 1-Bromo-4-ethoxybenzene                | 45.64 | 45.29 |

|                                                                         |       |       |
|-------------------------------------------------------------------------|-------|-------|
| 1-Bromo-4-ethylbenzene                                                  | 43.42 | 43.55 |
| 1-Bromo-4-fluorobenzene                                                 | 33.99 | 34.01 |
| 1-Bromo-4-isopropylbenzene                                              | 48.75 | 48.14 |
| 1-Bromo-4-methylpentane                                                 | 37.9  | 37.62 |
| 1-Bromo-4-vinylbenzene                                                  | 44.46 | 43.24 |
| 1-Bromo-5,5-dichlorohexane                                              | 47.77 | 47.29 |
| 1-Bromo-6-fluorohexane                                                  | 37.57 | 37.58 |
| 1-Bromo-7,7-dichlorooctane                                              | 56.61 | 56.55 |
| 1-bromo-9-chloro-5-nonanone                                             | 56.19 | 56.62 |
| 1-Bromobutane                                                           | 28.31 | 28.4  |
| 1-Bromodecane                                                           | 56.15 | 56.18 |
| 1-Bromododecane                                                         | 65.44 | 65.44 |
| 1-Bromoheptadecane                                                      | 88.63 | 88.59 |
| 1-Bromohexadecane                                                       | 83.99 | 83.96 |
| 1-Bromonaphthalene                                                      | 51.58 | 52.07 |
| 1-Bromononane                                                           | 51.55 | 51.55 |
| 1-Bromooctadecane                                                       | 93.26 | 93.22 |
| 1-Bromooctane                                                           | 46.9  | 46.92 |
| 1-Bromopentadecane                                                      | 79.54 | 79.33 |
| 1-Bromopentane                                                          | 32.98 | 33.03 |
| 1-Bromopropane                                                          | 23.68 | 23.77 |
| 1-Bromotetradecane                                                      | 74.72 | 74.7  |
| 1-Bromotridecane                                                        | 70.11 | 70.07 |
| 1-Bromoundecane                                                         | 60.84 | 60.81 |
| 1-Butanethiol                                                           | 28.46 | 28.33 |
| 1-Butanol                                                               | 22.14 | 22.07 |
| 1-Butene                                                                | 20.11 | 20.35 |
| 1-Butoxy-2-propanol                                                     | 37.68 | 37.66 |
| 1-Butoxy-4-methylbenzene                                                | 52.21 | 51.77 |
| 1-Butoxycyclohexene                                                     | 47.42 | 47.51 |
| 1-Butyl-1-methylpiperidinium<br>bis(trifluoromethylsulfonyl)amide       | 81.48 | 81.5  |
| 1-Butyl-1-methylpyrrolidinium 2-acrylamido-2-<br>methylpropanesulfonate | 91.47 | 90.77 |
| 1-Butyl-1-methylpyrrolidinium acetate                                   | 55    | 55.73 |
| 1-Butyl-1-methylpyrrolidinium<br>bis(trifluoromethylsulfonyl)amide      | 76.89 | 76.87 |
| 1-Butyl-1-methylpyrrolidinium dicyanamide                               | 60.12 | 59.43 |
| 1-Butyl-1-methylpyrrolidinium methylsulfate                             | 60.93 | 60.47 |
| 1-Butyl-1-methylpyrrolidinium<br>trifluoromethanesulfonate              | 60.44 | 60.06 |
| 1-Butyl-2,3-dimethylimidazolium<br>bis(trifluoromethanesulfonyl) amide  | 79.33 | 79.39 |



|                                                                        |        |        |
|------------------------------------------------------------------------|--------|--------|
| 1-Butyl-2,3-dimethylimidazolium tetrafluoroborate                      | 52.38  | 52.17  |
| 1-Butyl-2-methylpyridinium tetrafluoroborate                           | 53.45  | 53.58  |
| 1-Butyl-2-pyridone                                                     | 45.7   | 44.61  |
| 1-Butyl-3-(2-cyanoethyl)-imidazolium chloride                          | 57.93  | 58.25  |
| 1-Butyl-3-(2-cyanoethyl)imidazolium thiocyanate                        | 67.06  | 67.1   |
| 1-Butyl-3-ethylimidazolium<br>bis(trifluoromethylsulfonyl) amide       | 79.44  | 79.64  |
| 1-Butyl-3-ethylimidazolium triflate                                    | 63.01  | 62.83  |
| 1-Butyl-3-methylimidazolium 2-acryloamido-2-<br>methylpropanesulfonate | 88.52  | 88.95  |
| 1-Butyl-3-methylimidazolium acetate                                    | 54.18  | 53.91  |
| 1-Butyl-3-methylimidazolium<br>bis(perfluorobutanesulfonyl) amide      | 105.39 | 105.45 |
| 1-Butyl-3-methylimidazolium<br>bis(trifluoromethanesulfonyl) amide     | 74.99  | 75.05  |
| 1-Butyl-3-methylimidazolium dicyanoamide                               | 57.8   | 57.61  |
| 1-Butyl-3-methylimidazolium glycine                                    | 58.39  | 57.34  |
| 1-Butyl-3-methylimidazolium hexafluorophosphate                        | 51.46  | 51.56  |
| 1-Butyl-3-methylimidazolium methosulfate                               | 58.58  | 58.65  |
| 1-Butyl-3-methylimidazolium octylsulfate                               | 91.49  | 91.09  |
| 1-Butyl-3-methylimidazolium perfluorobutylsulfonate                    | 73.34  | 73.44  |
| 1-Butyl-3-methylimidazolium tetracyanoborate                           | 67.83  | 67.87  |
| 1-Butyl-3-methylimidazolium tetrafluoroborate                          | 47.81  | 47.83  |
| 1-Butyl-3-methylimidazolium thiocyanate                                | 57.79  | 58.09  |
| 1-Butyl-3-methylimidazolium threoninate                                | 68.48  | 67.95  |
| 1-Butyl-3-methylimidazolium tricyanomethanide                          | 65.33  | 65.39  |
| 1-Butyl-3-methylimidazolium trifluoromethylsulfonate                   | 57.91  | 58.24  |
| 1-Butyl-4-methylpyridinium tetrafluoroborate                           | 54     | 53.84  |
| 1-Butylamine                                                           | 24.08  | 24.09  |
| 1-Butyl-naphthalene                                                    | 63.15  | 63.18  |
| 1-Butylphosphine                                                       | 30.7   | 30.65  |
| 1-Butylpyridinium 2-acryloamido-2-<br>methylpropanesulfonate           | 91.01  | 90.15  |
| 1-Butylpyridinium bis(fluorosulfonyl) amide                            | 64.6   | 64.65  |
| 1-Butylpyridinium dicyanamide                                          | 58.87  | 58.81  |
| 1-Butylpyridinium tetrafluoroborate                                    | 48.99  | 49.03  |
| 1-Butyltetrahydrothiophenium dicyanamide                               | 59.59  | 59.81  |
| 1-Chloro-1,2-epoxycyclohexane                                          | 32.71  | 32.56  |
| 1-Chloro-1,2-epoxycyclopentane                                         | 27.79  | 27.93  |
| 1-Chloro-1,3-butadiene                                                 | 25.77  | 24.84  |
| 1-Chloro-1-ethoxyethane                                                | 27.58  | 27.27  |
| 1-Chloro-1-phenyl-2-propene                                            | 44.97  | 45.04  |
| 1-Chloro-2-(methylthio)ethane                                          | 28.48  | 28.54  |

|                                             |       |       |
|---------------------------------------------|-------|-------|
| 1-Chloro-2-(trichloromethyl)benzene         | 50.64 | 50.87 |
| 1-Chloro-2,2-difluoropropane                | 20.64 | 21.21 |
| 1-Chloro-2,2-dimethylpropane                | 30.13 | 30.07 |
| 1-Chloro-2,3-epoxycyclohexane               | 32.42 | 32.11 |
| 1-Chloro-2,3-epoxycyclopentane              | 27.85 | 27.48 |
| 1-Chloro-2,4-bis(trifluoromethyl)benzene    | 40.86 | 41.52 |
| 1-Chloro-2,4-dinitrobenzene                 | 45.36 | 44.68 |
| 1-Chloro-2-butanol                          | 26.79 | 26.88 |
| 1-Chloro-2-butyne                           | 23.8  | 23.96 |
| 1-Chloro-2-fluorobenzene                    | 30.95 | 31.24 |
| 1-Chloro-2-fluoroethane                     | 16.17 | 16.12 |
| 1-Chloro-2-isopropylbenzene                 | 45.23 | 45.37 |
| 1-Chloro-2-methoxyethane                    | 22.7  | 22.49 |
| 1-Chloro-2-methyl-1-propene                 | 25.06 | 25.22 |
| 1-Chloro-2-nitro-4-(trifluoromethyl)benzene | 43.11 | 43.1  |
| 1-Chloro-2-phenylethane                     | 40.48 | 40.76 |
| 1-Chloro-2-propanol                         | 22.35 | 22.25 |
| 1-Chloro-3-(1-methylethoxy)-2-propanol      | 36.65 | 37.84 |
| 1-Chloro-3-(trifluoromethyl)benzene         | 36.02 | 36.43 |
| 1-Chloro-3-ethylbenzene                     | 40.57 | 40.78 |
| 1-Chloro-3-fluoro-2-methylbenzene           | 35.86 | 36.05 |
| 1-Chloro-3-fluorobenzene                    | 30.97 | 31.24 |
| 1-Chloro-3-iodopropane                      | 34.06 | 33.71 |
| 1-Chloro-3-methyl-2-butene                  | 30.22 | 29.96 |
| 1-Chloro-4-((chloromethyl)thio)benzene      | 49.44 | 49.28 |
| 1-Chloro-4-(trifluoromethyl)benzene         | 35.89 | 36.43 |
| 1-Chloro-4-ethoxybenzene                    | 42.66 | 42.52 |
| 1-Chloro-4-fluorobutane                     | 25.36 | 25.38 |
| 1-Chloro-4-iodobutane                       | 38.4  | 38.34 |
| 1-Chloro-4-isopropylbenzene                 | 45.43 | 45.37 |
| 1-Chloro-4-nitro-2-(trifluoromethyl)benzene | 44.05 | 43.1  |
| 1-Chloro-4-tert-butylbenzene                | 50.26 | 50.02 |
| 1-Chloro-5-fluoropentane                    | 30.02 | 30.01 |
| 1-Chlorobut-1-yn-3-ene                      | 23.89 | 24.27 |
| 1-Chlorobutane                              | 25.47 | 25.46 |
| 1-Chlorocyclohexene                         | 31.95 | 32.5  |
| 1-Chlorodecane                              | 53.35 | 53.24 |
| 1-Chlorododecane                            | 62.65 | 62.5  |
| 1-Chloroheptane                             | 39.41 | 39.35 |
| 1-Chlorohexadecane                          | 81.24 | 81.02 |
| 1-Chlorohexane                              | 34.76 | 34.72 |
| 1-Chloronaphthalene                         | 48.86 | 49.3  |

|                                                                      |        |        |
|----------------------------------------------------------------------|--------|--------|
| 1-Chlorononane                                                       | 48.26  | 48.61  |
| 1-Chlorooctadecane                                                   | 90.54  | 90.28  |
| 1-Chlorooctane                                                       | 44.05  | 43.98  |
| 1-Chloropentane                                                      | 30.11  | 30.09  |
| 1-Chloropropane                                                      | 20.82  | 20.83  |
| 1-Chlorotetradecane                                                  | 71.94  | 71.76  |
| 1-Crotyl-2-pyridone                                                  | 45.35  | 44.41  |
| 1-Cyanonaphthalene                                                   | 49.18  | 49.08  |
| 1-Cyclohexene-1-carboxaldehyde                                       | 33.45  | 32.8   |
| 1-Cyclohexene-1-carboxylic acid                                      | 32.9   | 33.88  |
| 1-Cyclohexyl-4-hexyldecane                                           | 101.83 | 101.78 |
| 1-Cyclopentene-1-carboxaldehyde                                      | 28.51  | 28.17  |
| 1-Cyclopropyl-1,4-cyclohexadiene                                     | 38.78  | 39.16  |
| 1-Cyclopropylcyclohexene                                             | 39.7   | 39.36  |
| 1-Decanethiol                                                        | 55.81  | 56.11  |
| 1-Decen-3-yne                                                        | 47.38  | 46.63  |
| 1-Decene                                                             | 48.07  | 48.13  |
| 1-Decyl hydroperoxide                                                | 52.51  | 52.18  |
| 1-Decyl-3-methylimidazolium<br>bis(trifluoromethanesulfonyl) amide   | 102.9  | 102.83 |
| 1-Decyl-3-methylimidazolium tetracyanoborate                         | 95.66  | 95.65  |
| 1-Decyl-3-methylimidazolium tricyanomethanide                        | 93.23  | 93.17  |
| 1-Decylnaphthalene                                                   | 90.84  | 90.96  |
| 1-Decylphosphine                                                     | 58.37  | 58.43  |
| 1-Decyne                                                             | 46.32  | 46.4   |
| 1-Dimethylamino-2-propyne                                            | 26.97  | 27.15  |
| 1-Docosanoic acid                                                    | 106.35 | 105.6  |
| 1-Dodecanol                                                          | 59.31  | 59.11  |
| 1-Dodecen-3-yne                                                      | 56.71  | 55.89  |
| 1-Dodecene                                                           | 57.33  | 57.39  |
| 1-Dodecyl-2-methylcyclohexane                                        | 88.13  | 87.89  |
| 1-Dodecyl-3-methylcyclohexane                                        | 88.35  | 87.89  |
| 1-Dodecyl-3-methylimidazolium<br>bis(trifluoromethanesulfonyl) amide | 112.08 | 112.09 |
| 1-Dodecylphosphine                                                   | 67.22  | 67.69  |
| 1-Dodecylpiperidine                                                  | 82.68  | 82.53  |
| 1-Dodecyne                                                           | 55.61  | 55.66  |
| 1-Eicosene                                                           | 94.54  | 94.43  |
| 1-Ethoxy-1,1,2,2-tetrafluoroethane                                   | 22.39  | 23.11  |
| 1-Ethoxy-2-nitrobenzene                                              | 44.23  | 44.37  |
| 1-Ethoxycyclohexene                                                  | 37.7   | 38.25  |
| 1-Ethoxynaphthalene                                                  | 55.23  | 55.66  |

|                                                                        |       |       |
|------------------------------------------------------------------------|-------|-------|
| 1-Ethyl-1H-pyrrole                                                     | 30.22 | 30.42 |
| 1-Ethyl-1-methylcyclopentane                                           | 37.11 | 37.02 |
| 1-Ethyl-1-methylcyclopropane                                           | 28.55 | 27.76 |
| 1-Ethyl-1-phenylhydrazine                                              | 43.96 | 43.52 |
| 1-Ethyl-2,3-dimethylimidazolium<br>bis(trifluoromethanesulfonyl) amide | 69.94 | 70.13 |
| 1-Ethyl-2,4,5-trimethylbenzene                                         | 50.01 | 50.39 |
| 1-Ethyl-2-isopropylbenzene                                             | 49.77 | 49.99 |
| 1-Ethyl-2-propyn-1-ylether                                             | 24.71 | 24.94 |
| 1-Ethyl-2-pyrrolidinemethanamine                                       | 40.07 | 39.59 |
| 1-Ethyl-3-methylimidazolium 1,1,2,2-<br>tetrafluoroethanesulfonate     | 53.91 | 53.77 |
| 1-Ethyl-3-methylimidazolium acetate                                    | 44.95 | 44.65 |
| 1-Ethyl-3-methylimidazolium aminoacetate                               | 47.68 | 48.08 |
| 1-Ethyl-3-methylimidazolium<br>bis(trifluoromethanesulfonyl) amide     | 65.77 | 65.79 |
| 1-Ethyl-3-methylimidazolium dicyanamide                                | 48.35 | 48.35 |
| 1-Ethyl-3-methylimidazolium diethylphosphate                           | 64.56 | 64.35 |
| 1-Ethyl-3-methylimidazolium dimethylphosphate                          | 55.17 | 55.03 |
| 1-Ethyl-3-methylimidazolium ethosulfate                                | 54.16 | 54.05 |
| 1-Ethyl-3-methylimidazolium imidodisulfurylfluoride                    | 54.05 | 54.19 |
| 1-Ethyl-3-methylimidazolium L-alanine                                  | 52.1  | 52.64 |
| 1-Ethyl-3-methylimidazolium L-proline                                  | 58.84 | 59.7  |
| 1-Ethyl-3-methylimidazolium L-serine                                   | 54.05 | 54.05 |
| 1-Ethyl-3-methylimidazolium methanesulfonate                           | 48.45 | 48.69 |
| 1-Ethyl-3-methylimidazolium methylsulfate                              | 48.62 | 49.39 |
| 1-Ethyl-3-methylimidazolium taurinate                                  | 56.41 | 56.96 |
| 1-Ethyl-3-methylimidazolium tetracyanoborate                           | 58.77 | 58.61 |
| 1-Ethyl-3-methylimidazolium tetrafluoroborate                          | 38.7  | 38.57 |
| 1-Ethyl-3-methylimidazolium thiocyanate                                | 48.31 | 48.83 |
| 1-Ethyl-3-methylimidazolium threoninate                                | 58.86 | 58.69 |
| 1-Ethyl-3-methylimidazolium tricyanomethide                            | 55.87 | 56.13 |
| 1-Ethyl-3-methylimidazolium trifluoromethylsulfonate                   | 48.91 | 48.98 |
| 1-Ethyl-3-methylpyridinium bis(fluorosulfonyl) amide                   | 60.16 | 60.2  |
| 1-Ethyl-3-methylpyridinium ethylsulfate                                | 60.18 | 60.06 |
| 1-Ethyl-3-propylimidazolium<br>bis(trifluoromethanesulfonyl) amide     | 74.95 | 75.01 |
| 1-Ethyl-4-methoxybenzene                                               | 42.46 | 42.48 |
| 1-Ethyladamantane                                                      | 51.07 | 51.14 |
| 1-Ethylcyclohexene                                                     | 36.69 | 36.91 |
| 1-Ethylcyclopentene                                                    | 32.01 | 32.28 |
| 1-Ethylmorpholinium tetrafluoroborate                                  | 40.81 | 39.89 |

|                                                                     |       |       |
|---------------------------------------------------------------------|-------|-------|
| 1-Ethyl-naphthalene                                                 | 53.45 | 53.92 |
| 1-Ethylpiperidine                                                   | 36.79 | 36.23 |
| 1-Ethylpyridinium bis(fluorosulfonyl) amide                         | 55.18 | 55.39 |
| 1-Ethylpyridinium ethylsulfate                                      | 55.29 | 55.25 |
| 1-Ethylpyridinium triflate                                          | 50.05 | 50.18 |
| 1-Ethyltetrahydrothiophenium dicyanamide                            | 50.87 | 50.55 |
| 1-Ethynylcyclohexanamine                                            | 38.45 | 38.36 |
| 1-Ethynylcyclohexanol                                               | 35.87 | 36.36 |
| 1-Ethynylcyclopentanol                                              | 32.25 | 31.73 |
| 1-Fluoro-2-(trichloromethyl)benzene                                 | 46.32 | 45.95 |
| 1-Fluoro-4-(trifluoromethyl)benzene                                 | 30.94 | 31.51 |
| 1-Fluorobutane                                                      | 20.46 | 20.58 |
| 1-Fluorodecane                                                      | 48.31 | 48.36 |
| 1-Fluorododecane                                                    | 57.59 | 57.62 |
| 1-Fluoroheptane                                                     | 34.39 | 34.47 |
| 1-Fluorohexane                                                      | 29.74 | 29.84 |
| 1-Fluoronaphthalene                                                 | 43.73 | 44.38 |
| 1-Fluorononane                                                      | 43.74 | 43.73 |
| 1-Fluorooctane                                                      | 39.02 | 39.1  |
| 1-Fluoropentane                                                     | 25.1  | 25.21 |
| 1-Fluoropropane                                                     | 15.82 | 15.95 |
| 1-Fluorotetradecane                                                 | 67.03 | 66.88 |
| 1-Fluoroundecane                                                    | 52.98 | 52.99 |
| 1-Formyl-naphthalene                                                | 49.57 | 49.81 |
| 1-Formylpiperidine                                                  | 31.67 | 31.68 |
| 1-Heptadecene                                                       | 80.54 | 80.54 |
| 1-Heptadecylamine                                                   | 84.3  | 84.28 |
| 1-Heptanethiol                                                      | 42.35 | 42.22 |
| 1-Heptanol                                                          | 36.14 | 35.96 |
| 1-Hepten-3-yne                                                      | 33.5  | 32.74 |
| 1-Hepten-4-ol                                                       | 35.52 | 35.66 |
| 1-Heptene                                                           | 34.14 | 34.24 |
| 1-Heptyl-3-methylimidazolium<br>bis(trifluoromethanesulfonyl) amide | 88.14 | 88.94 |
| 1-Heptyl-3-methylimidazolium hexafluorophosphate                    | 65.44 | 65.45 |
| 1-Heptylhydroperoxide                                               | 38.36 | 38.29 |
| 1-Heptylnaphthalene                                                 | 76.95 | 77.07 |
| 1-Heptyltrifluorosilane                                             | 41.32 | 41.07 |
| 1-Heptyne                                                           | 32.43 | 32.51 |
| 1-Hexadecylphosphine                                                | 86.24 | 86.21 |
| 1-Hexadecyne                                                        | 74.18 | 74.18 |
| 1-Hexanethiol                                                       | 37.69 | 37.59 |

|                                                                      |       |       |
|----------------------------------------------------------------------|-------|-------|
| 1-Hexanol                                                            | 31.64 | 31.33 |
| 1-Hexen-3-ol                                                         | 31.01 | 31.03 |
| 1-Hexen-3-yne                                                        | 28.87 | 28.11 |
| 1-Hexen-5-one                                                        | 29.68 | 29.88 |
| 1-Hexene                                                             | 29.52 | 29.61 |
| 1-Hexyl-1,2,3,4-tetrahydronaphthalene                                | 70.84 | 71    |
| 1-Hexyl-1-methylpyrrolidinium<br>bis(trifluoromethanesulfonyl) amide | 87.26 | 86.13 |
| 1-Hexyl-3,5-dimethylpyridinium<br>bis(trifluoromethylsulfonyl)amide  | 95.56 | 95.13 |
| 1-Hexyl-3-methylimidazolium acetate                                  | 63.54 | 63.17 |
| 1-Hexyl-3-methylimidazolium<br>bis(trifluoromethanesulfonyl) amide   | 84.23 | 84.31 |
| 1-Hexyl-3-methylimidazolium chloride                                 | 58.8  | 58.5  |
| 1-Hexyl-3-methylimidazolium dicyanoamide                             | 67.19 | 66.87 |
| 1-Hexyl-3-methylimidazolium hexafluorophosphate                      | 60.69 | 60.82 |
| 1-Hexyl-3-methylimidazolium tetracyanoborate                         | 76.88 | 77.13 |
| 1-Hexyl-3-methylimidazolium tetrafluoroborate                        | 56.91 | 57.09 |
| 1-Hexyl-3-methylimidazolium thiocyanate                              | 68.17 | 67.35 |
| 1-Hexyl-3-methylimidazolium tricyanomethanide                        | 74.67 | 74.65 |
| 1-Hexylhydroperoxide                                                 | 33.62 | 33.66 |
| 1-Hexylnaphthalene                                                   | 72.27 | 72.44 |
| 1-Hexylphosphine                                                     | 40.01 | 39.91 |
| 1-Hexylpyridinium bis(fluorosulfonyl) amide                          | 73.94 | 73.91 |
| 1-Hexyn-3-ol                                                         | 29.36 | 29.3  |
| 1-Hexyne                                                             | 27.76 | 27.88 |
| 1H-Pentadecafluoroheptane                                            | 36.27 | 36.62 |
| 1H-Pyrazole                                                          | 18.24 | 18.56 |
| 1-Hydroxy-2-butanone                                                 | 21.66 | 22.34 |
| 1-Hydroxycyclohexanecarbonitrile                                     | 34.29 | 33.56 |
| 1-Hydroxytetralin                                                    | 43.83 | 44.68 |
| 1-Indanamine                                                         | 41.57 | 41.99 |
| 1-Indanone                                                           | 39.11 | 38.9  |
| 1-Iodo-2,2-dimethylpropane                                           | 38.26 | 38.15 |
| 1-Iodo-2,4-dimethylbenzene                                           | 48.81 | 48.71 |
| 1-Iodo-2,5-dimethylbenzene                                           | 49.05 | 48.71 |
| 1-Iodo-2,6-dimethylbenzene                                           | 49.36 | 48.71 |
| 1-Iodo-2-triazobenzene                                               | 48.05 | 47.86 |
| 1-Iodobutane                                                         | 33.51 | 33.54 |
| 1-Iododecane                                                         | 61.15 | 61.32 |
| 1-Iodododecane                                                       | 70.59 | 70.58 |
| 1-Iodoheptafluoropropane                                             | 29.04 | 29.5  |

|                                                                       |       |        |
|-----------------------------------------------------------------------|-------|--------|
| 1-Iodoheptane                                                         | 47.43 | 47.43  |
| 1-Iodohexadecane                                                      | 89.5  | 89.1   |
| 1-Iodohexane                                                          | 42.79 | 42.8   |
| 1-Iodonaphthalene                                                     | 56.6  | 57.05  |
| 1-Iodononane                                                          | 56.73 | 56.69  |
| 1-Iodooctadecane                                                      | 98.47 | 98.36  |
| 1-Iodooctane                                                          | 52.07 | 52.06  |
| 1-Iodopentane                                                         | 38.15 | 38.17  |
| 1-Isoamyloxycyclohexene                                               | 52.07 | 52.1   |
| 1-Isobutyl-1-methylpyrrolidinium<br>bis(trifluoromethylsulfonyl)amide | 77.02 | 76.83  |
| 1-Isobutyl-3-methylimidazolium<br>bis(trifluoromethanesulfonyl) amide | 74.92 | 75.01  |
| 1-Isobutyl-3-methylpyridinium<br>bis(trifluoromethylsulfonyl)amide    | 81.23 | 81.02  |
| 1-Isopropoxy-2-propanol                                               | 33.1  | 33.04  |
| 1-Isopropyl-4-nitrobenzene                                            | 47.57 | 47.22  |
| 1-Isopropyl-naphthalene                                               | 58.12 | 58.51  |
| 1-Methoxy-2-crotyl-4-methylbenzene                                    | 56.4  | 56.35  |
| 1-Methoxy-2-methyl-4,6-dicrotylbenzene                                | 74.17 | 74.85  |
| 1-Methoxy-2-methyl-4-crotylbenzene                                    | 56.27 | 56.35  |
| 1-Methoxy-2-propanol                                                  | 22.88 | 23.74  |
| 1-Methoxy-2-propanone                                                 | 22.17 | 22.59  |
| 1-Methoxy-4-methyl-2,6-di(3-hexen-2-yl)benzene                        | 93.21 | 93.29  |
| 1-Methoxy-4-Methyl-2,6-dicrotylbenzene                                | 74.42 | 74.85  |
| 1-Methoxy-4-propylbenzene                                             | 47.07 | 47.11  |
| 1-Methoxy-5-heptanol                                                  | 42.19 | 42.26  |
| 1-Methoxy-5-undecanol                                                 | 60.76 | 60.78  |
| 1-Methoxybut-1-yn-3-ene                                               | 25.83 | 25.24  |
| 1-Methoxycyclohexene                                                  | 33.39 | 33.59  |
| 1-Methoxynaphthalene                                                  | 50.9  | 51     |
| 1-Methyl-1-(2',3'-epoxypropyl)-2-oxopyrrolidinium<br>chloride         | 49.38 | 49.79  |
| 1-Methyl-1,3-cyclopentadiene                                          | 26.65 | 27.45  |
| 1-Methyl-1-butylhydrazine                                             | 32.66 | 32.59  |
| 1-Methyl-1-decylpyrrolidinium<br>bis(trifluoromethanesulfonyl) amide  | 104.9 | 104.65 |
| 1-Methyl-1H-indene                                                    | 43.5  | 43.02  |
| 1-Methyl-1H-pyrazole                                                  | 23.44 | 23.77  |
| 1-Methyl-1-isobutylhydrazine                                          | 32.66 | 32.55  |
| 1-Methyl-1-isopropylhydrazine                                         | 27.75 | 27.89  |
| 1-Methyl-1-phenylhydrazine                                            | 38.48 | 38.93  |
| 1-Methyl-1-propylhydrazine                                            | 27.98 | 27.96  |

|                                                                       |       |       |
|-----------------------------------------------------------------------|-------|-------|
| 1-Methyl-1-propylpiperidinium<br>bis(trifluoromethylsulfonyl)amide    | 76.9  | 76.87 |
| 1-Methyl-1-propylpyrrolidinium bis(fluorosulfonyl)<br>amide           | 61.04 | 60.64 |
| 1-Methyl-1-propylpyrrolidinium<br>bis(trifluoromethanesulfonyl) amide | 72.5  | 72.24 |
| 1-Methyl-2-ethyl-5-propylpyrrole                                      | 48.85 | 48.94 |
| 1-Methyl-2-ethyl-5-propylpyrrolidine                                  | 49.54 | 50.02 |
| 1-Methyl-2-piperidone                                                 | 31.43 | 31.58 |
| 1-Methyl-2-propyl-4-ethylpyrrole                                      | 49.23 | 49.03 |
| 1-Methyl-2-propyl-4-ethyl-pyrrolidine                                 | 49.94 | 50.05 |
| 1-Methyl-2-pyrrolidonium tetrafluoroborate                            | 37.04 | 37.68 |
| 1-Methyl-3-hexylimidazolium threoninate                               | 77.73 | 77.21 |
| 1-Methyl-3-pentylimidazolium threoninate                              | 73.07 | 72.58 |
| 1-Methyl-3-phenoxybenzene                                             | 57.74 | 57.84 |
| 1-Methyl-3-phenylpropylamine                                          | 48.46 | 48.58 |
| 1-Methyl-3-piperidinol                                                | 33.5  | 33.06 |
| 1-Methyl-3-propylimidazolium threoninate                              | 63.75 | 63.32 |
| 1-Methyl-4-(1-methylvinyl)benzene                                     | 45.58 | 45.16 |
| 1-Methyl-4-(1-pentenyl-2-oxy)benzene                                  | 55.88 | 56.1  |
| 1-Methyl-4-(phenylthio)benzene                                        | 64.25 | 64.24 |
| 1-Methyl-4-benzylbenzene                                              | 60.05 | 60.7  |
| 1-Methyl-4-cyclopropyl-1,4-cyclohexadiene                             | 43.48 | 43.86 |
| 1-Methyl-4-isopropyl-2-nitrobenzene                                   | 51.54 | 52.03 |
| 1-Methyl-4-isopropyl-7-oxabicyclo[2.2.1]heptane                       | 46.62 | 45.71 |
| 1-Methyl-4-isopropylcyclohexanol                                      | 47.73 | 47.58 |
| 1-Methyl-4-isopropylcyclohexene                                       | 45.9  | 46.09 |
| 1-Methyl-4-piperidone                                                 | 31.8  | 31.91 |
| 1-Methyl-4-vinylcyclohexene                                           | 40.12 | 41.19 |
| 1-Methylanthracene                                                    | 66.73 | 67.25 |
| 1-Methylbenzimidazole                                                 | 40.66 | 41.04 |
| 1-Methylcyclohexanol                                                  | 33.99 | 33.77 |
| 1-Methylcyclohexene                                                   | 31.92 | 32.28 |
| 1-Methylcyclopentanol                                                 | 29.36 | 29.14 |
| 1-Methylcyclopentene                                                  | 27.51 | 27.65 |
| 1-Methylimidazole                                                     | 23.27 | 23.28 |
| 1-Methylmorpholinium tetrafluoroborate                                | 35.9  | 35.57 |
| 1-Methylnaphthalene                                                   | 48.68 | 49.29 |
| 1-Methylpiperidinium tetrafluoroborate                                | 37.84 | 38.51 |
| 1-Methylpyridinium methylsulfate                                      | 46.05 | 46.27 |
| 1-Methylpyrrole                                                       | 25.53 | 25.83 |
| 1-Methylpyrrolidinium tetrafluoroborate                               | 34.55 | 33.88 |



|                                                                    |       |       |
|--------------------------------------------------------------------|-------|-------|
| 1-Methyltetralin                                                   | 47.53 | 47.85 |
| 1-Naphthalenethiol                                                 | 52.18 | 52.47 |
| 1-Naphthol                                                         | 46.23 | 46.25 |
| 1-Naphthylamine                                                    | 48.79 | 48.55 |
| 1-Nitrobutane                                                      | 26.27 | 26.4  |
| 1-Nitrohexane                                                      | 35.84 | 35.66 |
| 1-Nitrooctane                                                      | 44.21 | 44.92 |
| 1-Nitropentane                                                     | 30.96 | 31.03 |
| 1-Nitropropane                                                     | 21.66 | 21.77 |
| 1-Nitropropylene                                                   | 22.06 | 21.02 |
| 1-Nonadecene                                                       | 89.86 | 89.8  |
| 1-Nonanol                                                          | 45.31 | 45.22 |
| 1-Nonen-3-ol                                                       | 45.33 | 44.92 |
| 1-Nonen-3-yne                                                      | 42.82 | 42    |
| 1-Nonene                                                           | 44.57 | 43.5  |
| 1-Nonyl hydroperoxide                                              | 47.44 | 47.55 |
| 1-Nonyl-3-methylimidazolium<br>bis(trifluoromethanesulfonyl) amide | 98.06 | 98.2  |
| 1-Nonyl-3-methylimidazolium hexafluorophosphate                    | 74.74 | 74.71 |
| 1-Nonylnaphthalene                                                 | 86.19 | 86.33 |
| 1-Nonylphosphine                                                   | 53.74 | 53.8  |
| 1-Nonyne                                                           | 41.2  | 41.77 |
| 1-Octadecene                                                       | 85.13 | 85.17 |
| 1-Octadecylphosphine                                               | 95.56 | 95.47 |
| 1-Octanethiol                                                      | 46.98 | 46.85 |
| 1-Octanol                                                          | 40.68 | 40.59 |
| 1-Octen-3-ol                                                       | 40.18 | 40.29 |
| 1-Octen-3-yne                                                      | 38.18 | 37.37 |
| 1-Octyl hydroperoxide                                              | 42.97 | 42.92 |
| 1-Octyl-3-methylimidazolium<br>bis(trifluoromethanesulfonyl) amide | 93.61 | 93.57 |
| 1-Octyl-3-methylimidazolium chloride                               | 67.8  | 67.76 |
| 1-Octyl-3-methylimidazolium hexafluorophosphate                    | 70.3  | 70.08 |
| 1-Octyl-3-methylimidazolium tetracyanoborate                       | 86.41 | 86.39 |
| 1-Octyl-3-methylimidazolium tetrafluoroborate                      | 66.24 | 66.35 |
| 1-Octyl-3-methylimidazolium tricyanomethanide                      | 84.09 | 83.91 |
| 1-Octyl-3-methylpyridinium tetrafluoroborate                       | 72.74 | 72.36 |
| 1-Octylnaphthalene                                                 | 81.6  | 81.7  |
| 1-Octylphosphine                                                   | 49.07 | 49.17 |
| 1-Octylpyridinium bis(trifluoromethylsulfonyl)amide                | 95.19 | 94.77 |
| 1-Octyne                                                           | 37.06 | 37.14 |
| 1-Pentadecanoic acid                                               | 73.65 | 73.19 |

|                                                                     |       |       |
|---------------------------------------------------------------------|-------|-------|
| 1-Pentadecene                                                       | 71.27 | 71.28 |
| 1-Pentadecyne                                                       | 69.53 | 69.55 |
| 1-Pentanethiol                                                      | 32.75 | 32.96 |
| 1-Pentanol                                                          | 26.82 | 26.7  |
| 1-Penten-3-ol                                                       | 26.19 | 26.4  |
| 1-Penten-3-one                                                      | 25.11 | 25.25 |
| 1-Penten-3-yne                                                      | 23.98 | 23.48 |
| 1-Penten-4-yne                                                      | 22.31 | 22.94 |
| 1-Pentene                                                           | 24.86 | 24.98 |
| 1-Pentyl-3-methylimidazolium acetate                                | 59.01 | 58.54 |
| 1-Pentyl-3-methylimidazolium<br>bis(trifluoromethanesulfonyl) amide | 79.57 | 79.68 |
| 1-Pentyl-3-methylimidazolium hexafluorophosphate                    | 56.11 | 56.19 |
| 1-Pentyl-3-methylimidazolium tetrafluoroborate                      | 52.25 | 52.46 |
| 1-Pentylnaphthalene                                                 | 67.62 | 67.81 |
| 1-Pentylphosphine                                                   | 35.42 | 35.28 |
| 1-Pentylpyridinium dicyanamide                                      | 63.44 | 63.44 |
| 1-Pentyne                                                           | 23.14 | 23.25 |
| 1-Phenoxy-2-propanol                                                | 43.78 | 43.75 |
| 1-Phenoxy-2-propanone                                               | 42.06 | 42.6  |
| 1-Phenyl-1,2-propanedione                                           | 42.04 | 41.13 |
| 1-Phenyl-1-butanol                                                  | 46.43 | 46.64 |
| 1-Phenyl-1-dodecanone                                               | 82.62 | 82.53 |
| 1-Phenyl-1-propanol                                                 | 41.55 | 42.01 |
| 1-Phenyl-1-propanone                                                | 41.03 | 40.86 |
| 1-Phenyl-2,3,5-trimethylpyrazolium methylsulfonate                  | 68.77 | 69.35 |
| 1-Phenyl-2-butanone                                                 | 44.99 | 45.49 |
| 1-Phenyl-2-buten-1-one                                              | 46.29 | 45.29 |
| 1-Phenyl-2-butene                                                   | 44.78 | 45.02 |
| 1-Phenyl-2-butyl-3,5-dimethylpyrazolium<br>methylsulfonate          | 82.67 | 82.93 |
| 1-Phenyl-2-heptyl-3,5-dimethylpyrazolium<br>methylsulfonate         | 97.61 | 96.82 |
| 1-Phenyl-2-hexyl-3,5-dimethylpyrazolium<br>methylsulfonate          | 92.64 | 92.19 |
| 1-Phenyl-2-methyl-2-propanol                                        | 46.46 | 46.58 |
| 1-Phenyl-2-methylpropanol                                           | 46.22 | 46.6  |
| 1-Phenyl-2-pentanone                                                | 49.62 | 50.12 |
| 1-Phenyl-2-pentyl-3,5-dimethylpyrazolium<br>methylsulfonate         | 87.17 | 87.56 |
| 1-Phenyl-2-propanol                                                 | 41.71 | 42.01 |
| 1-Phenyl-3-butene                                                   | 44.47 | 44.91 |
| 1-Phenyl-3-hexanone                                                 | 54.2  | 54.75 |

|                                                                     |        |        |
|---------------------------------------------------------------------|--------|--------|
| 1-Phenyl-3-pentanone                                                | 49.58  | 50.12  |
| 1-Phenyl-4-hexyl-3-decene                                           | 100.34 | 100.65 |
| 1-Phenyl-4-hexyldecane                                              | 100.63 | 100.74 |
| 1-Phenylallyl alcohol                                               | 41.11  | 41.7   |
| 1-Phenylcyclohexene                                                 | 52.37  | 52.21  |
| 1-Phenyldodecane                                                    | 82.22  | 82.26  |
| 1-Phenylimidazole                                                   | 43.42  | 42.77  |
| 1-Phenylnaphthalene                                                 | 69.33  | 69.22  |
| 1-Phenylpiperazine                                                  | 51.37  | 50.95  |
| 1-Phenylpropargyl alcohol                                           | 39.56  | 39.97  |
| 1-Phenylpyrrolidine                                                 | 48.22  | 47.58  |
| 1-Piperazineethanamine                                              | 38.47  | 38.4   |
| 1-Piperidinamine                                                    | 30.39  | 30.41  |
| 1-Piperidineethanol                                                 | 37.48  | 37.64  |
| 1-Piperidinepropanenitrile                                          | 40.83  | 40.65  |
| 1-Propanesulfonylchloride                                           | 30.36  | 29.87  |
| 1-Propanethiol                                                      | 23.77  | 23.7   |
| 1-Propanol                                                          | 17.61  | 17.44  |
| 1-Propionaphthone                                                   | 58.57  | 58.82  |
| 1-Propoxy-2-propanol                                                | 33.16  | 33.03  |
| 1-Propoxycyclohexene                                                | 42.99  | 42.88  |
| 1-Propyl-3-methylimidazolium acetate                                | 49.37  | 49.28  |
| 1-Propyl-3-methylimidazolium<br>bis(trifluoromethanesulfonyl) amide | 70.48  | 70.42  |
| 1-Propyl-3-methylimidazolium tetrafluoroborate                      | 43.09  | 43.2   |
| 1-Propylamine                                                       | 19.4   | 19.46  |
| 1-Propylcyclopentanol                                               | 38.13  | 38.4   |
| 1-Propylnaphthalene                                                 | 58.24  | 58.55  |
| 1-Propylpyridinium dicyanamide                                      | 54.24  | 54.18  |
| 1-Propylpyridinium tetrafluoroborate                                | 44.35  | 44.4   |
| 1-Propynylbenzene                                                   | 40.05  | 39.09  |
| 1-Propyronitrile-3-butylimidazolium bromide                         | 62.6   | 62.36  |
| 1-Propyronitrile-3-hexylimidazolium bromide                         | 71.74  | 71.62  |
| 1-Propyronitrile-3-octylimidazolium bromide                         | 80.51  | 80.88  |
| 1-Pyrrolidineethanamine                                             | 35.28  | 35.03  |
| 1-Pyrrolidineethanol                                                | 33.04  | 33.01  |
| 1-t-Amylnaphthalene                                                 | 67.88  | 67.79  |
| 1-t-Butyl-4-methoxybenzene                                          | 65.1   | 65.64  |
| 1-t-Butylnaphthalene                                                | 62.99  | 63.16  |
| 1-Tetradecanethiol                                                  | 74.4   | 74.63  |
| 1-Tetradecene                                                       | 66.18  | 66.65  |
| 1-Tetradecylamine                                                   | 70.48  | 70.39  |

|                                          |       |       |
|------------------------------------------|-------|-------|
| 1-Tetradecylphosphine                    | 76.86 | 76.95 |
| 1-Tetralone                              | 43.47 | 43.53 |
| 1-Tridecene                              | 62.01 | 62.02 |
| 1-Tridecyne                              | 59.51 | 60.29 |
| 1-Undecanol                              | 54.64 | 54.48 |
| 1-Undecene                               | 52.7  | 52.76 |
| 1-Undecyne                               | 50.97 | 51.03 |
| 1-Vinyl-3-nitrobenzene                   | 43.19 | 42.32 |
| 1-Vinyl-4-fluorobenzene                  | 36.04 | 35.55 |
| 1-Vinylcyclohexene                       | 36.37 | 36.6  |
| 2-((2-Methylphenyl)amino)ethanol         | 45.8  | 46.31 |
| 2-(1,1,2,2-Tetrafluoroethoxy)ethanol     | 24.11 | 24.52 |
| 2-(1-Ethylpropyl)pyridine                | 47.62 | 47.68 |
| 2-(1-Hydroxybutyl)furan                  | 39.57 | 39.06 |
| 2-(1-Hydroxyethyl)-thiophene             | 36    | 35.85 |
| 2-(1-Hydroxyisobutyl)furan               | 38.61 | 39.02 |
| 2-(1-Iodoethyl)-1,3-dioxolane-4-methanol | 45.54 | 45.63 |
| 2-(1-Methyl-3-butenyl)-4-cresol          | 55.75 | 56.08 |
| 2-(1-Methylvinyl)aniline                 | 44.87 | 44.42 |
| 2-(1-Vinyloxyethyl)-thiophene            | 44.44 | 44.69 |
| 2-(2-(1-Methylethoxy)ethyl)pyridine      | 49.58 | 49.42 |
| 2-(2-(2-Butoxyethoxy)ethoxy)ethanol      | 54.85 | 54.92 |
| 2-(2-(Diethylamino)ethoxy)ethanol        | 45.82 | 46.1  |
| 2-(2-(Methylthio)ethylthio)ethanol       | 42.24 | 42.33 |
| 2-(2-Butoxyethoxy)ethyl acetate          | 53.16 | 53.57 |
| 2-(2-Chloroethoxy)ethanol                | 28.53 | 28.56 |
| 2-(2-Hydroxyethyl)-thiophene             | 35.64 | 35.84 |
| 2-(2-Methoxyethoxy)ethanol               | 29.77 | 30.05 |
| 2-(2-Methoxyethyl)pyridine               | 40.66 | 40.12 |
| 2-(2-Methylpropoxy)ethanol               | 33.2  | 32.98 |
| 2-(2-Pyridyl)ethanol                     | 35.23 | 35.24 |
| 2-(2-Pyridyl)ethylamine                  | 37.13 | 37.26 |
| 2-(2-Vinyloxyethyl)-thiophene            | 44.75 | 44.68 |
| 2-(3-Methyl-6-hydroxyphenyl)-3-hexene    | 60.7  | 60.82 |
| 2-(3-Methyl-6-methoxyphenyl)-3-hexene    | 65.7  | 65.57 |
| 2-(3-Pentenyl)pyridine                   | 47.49 | 47.52 |
| 2-(4-Ethylphenyl)ethanol                 | 46.65 | 46.81 |
| 2-(Acetyloxy)-1-phenylethanone           | 47.21 | 47.24 |
| 2-(Allyloxy)ethanol                      | 27.86 | 28.08 |
| 2-(Benzylamino)ethanol                   | 44.75 | 45.37 |
| 2-(Benzyloxy)ethanol                     | 43.72 | 43.69 |
| 2-(Bromomethoxy)butane                   | 35.45 | 35.91 |

|                                                 |       |       |
|-------------------------------------------------|-------|-------|
| 2-(Bromomethoxy)heptane                         | 50.11 | 49.8  |
| 2-(Bromomethoxy)octane                          | 55.12 | 54.43 |
| 2-(Bromomethyl)tetrahydrofuran                  | 32.22 | 32.59 |
| 2-(Butylamino)ethanol                           | 34.93 | 34.7  |
| 2-(Chloromethyl)-2-methyloxirane                | 25.05 | 24.96 |
| 2-(Chloromethyl)furan                           | 28.8  | 28.55 |
| 2-(Chloromethylthio)benzothiazole               | 59.68 | 59.8  |
| 2-(Diethoxymethyl)furan                         | 45.42 | 45.49 |
| 2-(Diethylamino)ethyl acrylate                  | 47.94 | 49.07 |
| 2-(Ethylamino)ethanol                           | 25.91 | 25.44 |
| 2-(Isopropylamino)ethanol                       | 30.28 | 30    |
| 2-(Methacryloyloxy)ethyl acetoacetate           | 51.9  | 52.76 |
| 2-(Methoxymethyl)furan                          | 30.05 | 30.04 |
| 2-(Methylthio)aniline                           | 44.24 | 43.5  |
| 2-(Methylthio)ethanol                           | 24.9  | 25.15 |
| 2-(Methylthiomethylthio)ethanol                 | 37.42 | 37.5  |
| 2-(Phenoxymethyl)oxirane                        | 41.81 | 41.89 |
| 2-(Phenylmethoxy)phenol                         | 58.61 | 59.4  |
| 2-(Propylamino)ethanol                          | 30.36 | 30.07 |
| 2,2,2-Trifluoroethanol                          | 13.13 | 13.09 |
| 2,2,3,3,4,4,4-Heptafluoro-1-butanol             | 22.95 | 23.11 |
| 2,2,3,3,4,4,5,5-Octafluoro-1-pentanol           | 27.48 | 27.73 |
| 2,2,3,3,4-Pentamethylpentane                    | 47.91 | 48.36 |
| 2,2,3,3-Tetrafluoro-1-propanol                  | 17.62 | 17.71 |
| 2,2,3,3-Tetramethylbutane                       | 38.63 | 39.14 |
| 2,2,3,3-Tetramethylbutanoic acid                | 40.61 | 40.74 |
| 2,2,3,3-Tetramethylhexane                       | 48.13 | 48.4  |
| 2,2,3,3-Tetramethylpentane                      | 43.43 | 43.77 |
| 2,2,3,4,4-Pentamethylpentane                    | 48.2  | 48.36 |
| 2,2,3,4-Tetramethylhexane                       | 47.96 | 48.34 |
| 2,2,3,4-Tetramethylpentane                      | 43.44 | 43.71 |
| 2,2,3-Tribromobutane                            | 43.9  | 44.06 |
| 2,2,3-Trichloro-1,1,1,3,4,4,4-heptafluorobutane | 35.64 | 35.82 |
| 2,2,3-Trichlorobutyraldehyde                    | 35.43 | 35.57 |
| 2,2,3-Trimethylbutanoic acid                    | 35.96 | 36.09 |
| 2,2,3-Trimethylhexane                           | 43.85 | 43.75 |
| 2,2,3-Trimethylpentane                          | 38.93 | 39.12 |
| 2,2,4,4,6,6-Hexamethylcyclotrisilazane          | 63.9  | 63.78 |
| 2,2,4,4-Tetramethylpentane                      | 43.87 | 43.77 |
| 2,2,4,6,6-Pentamethylheptane                    | 57.79 | 57.62 |
| 2,2,4-Trimethyl-1,3-pentanediol                 | 42.09 | 41.95 |
| 2,2,4-Trimethyl-3-pentanol                      | 40.45 | 40.54 |

|                                             |       |       |
|---------------------------------------------|-------|-------|
| 2,2,4-Trimethyl-3-pentanone                 | 39.05 | 39.39 |
| 2,2,4-Trimethylcyclopentanone               | 37.17 | 37.25 |
| 2,2,4-Trimethylhexane                       | 44.05 | 43.75 |
| 2,2,4-Trimethylpiperidine                   | 40.76 | 40.3  |
| 2,2,5,5-Tetramethylhexane                   | 48.84 | 48.4  |
| 2,2,5,5-Tetramethyltetrahydrofuran          | 38.86 | 38.63 |
| 2,2,5-Trimethylhexane                       | 43.94 | 43.75 |
| 2,2,6,6-Tetramethyl-4-piperidinamine        | 47.86 | 48.26 |
| 2,2,6-Trimethylcyclohexanone                | 41.43 | 41.88 |
| 2,2,6-Trimethylheptane                      | 48.73 | 48.38 |
| 2,2'-Bioxirane                              | 20.18 | 19.78 |
| 2,2'-Diaminodiethylamine                    | 30.68 | 30.89 |
| 2,2-Bis(butylthio)-1-propanol               | 70.56 | 70.56 |
| 2,2-Bis(butylthio)butane                    | 73.59 | 73.78 |
| 2,2-Bis(isobutylthio)-1-propanol            | 70.94 | 70.48 |
| 2,2-Bis(isopropylthio)butane                | 63.91 | 64.5  |
| 2,2-Bis(isopropylthio)propane               | 59.8  | 59.87 |
| 2,2-Bis(methylthio)-hexane                  | 55.64 | 54.84 |
| 2,2-Bis(propylthio)-1-propanol              | 61.69 | 61.3  |
| 2,2-Dichloro-4,4-dimethylhexane             | 48.62 | 48.79 |
| 2,2-Dichloro-4,4-dimethylpentane            | 44.64 | 44.16 |
| 2,2-Dichloro-7,7-bis(ethoxycarbonyl)heptane | 75.52 | 75.42 |
| 2,2-Dichlorobutane                          | 29.67 | 30.29 |
| 2,2'-Dichlorodiisopropyl ether              | 41.01 | 41.23 |
| 2,2-Dichloroethanol                         | 22.54 | 22.47 |
| 2,2-Dichloroethylsulfonyl fluoride          | 30.24 | 30.68 |
| 2,2-Dichlorohexane                          | 39.89 | 39.55 |
| 2,2-Dichloropropane                         | 25.4  | 25.66 |
| 2,2-Diethoxybutane                          | 42.07 | 42.29 |
| 2,2-Diethoxyethanamine                      | 36.21 | 36.57 |
| 2,2-Diethoxyhexane                          | 51.06 | 51.55 |
| 2,2-Diethoxypentane                         | 46.61 | 46.92 |
| 2,2-Diethoxypropane                         | 38.14 | 37.66 |
| 2,2-Diethyl-5-propyltetrahydrofuran         | 52.64 | 52.58 |
| 2,2-Diethyl-5-propylthiophane               | 58.56 | 59.21 |
| 2,2-Difluoropropane                         | 15.79 | 16.41 |
| 2,2-Dimethoxybutane                         | 32.75 | 32.97 |
| 2,2-Dimethoxyethanamine                     | 27.37 | 27.25 |
| 2,2-Dimethoxy-N-methylethanamine            | 31.92 | 31.86 |
| 2,2-Dimethoxypropane                        | 28.35 | 28.34 |
| 2,2-Dimethyl-1-butanol                      | 31.27 | 31.31 |
| 2,2-Dimethyl-3-ethylpentane                 | 42.93 | 43.75 |

|                                                        |       |       |
|--------------------------------------------------------|-------|-------|
| 2,2-Dimethyl-3-pentanol                                | 35.8  | 35.95 |
| 2,2-Dimethyl-4-(2-butylthioethoxymethyl)-1,3-dioxolane | 67.89 | 68.29 |
| 2,2'-Dimethylbiphenyl                                  | 60.82 | 60.88 |
| 2,2-Dimethylbutanoic acid                              | 31.33 | 31.5  |
| 2,2-Dimethylcyclohexanone                              | 36.99 | 37.29 |
| 2,2-Dimethylheptane                                    | 43.92 | 43.79 |
| 2,2-Dimethylhexane                                     | 39.25 | 39.16 |
| 2,2-Dimethylnonanoic acid                              | 54.52 | 54.65 |
| 2,2-Dimethyloctadecane                                 | 94.88 | 94.72 |
| 2,2-Dimethyloctane                                     | 48.72 | 48.42 |
| 2,2-Dimethyloctanoic acid                              | 49.89 | 50.02 |
| 2,2-Dimethyloxirane                                    | 20.16 | 20.16 |
| 2,2-Dimethylpentane                                    | 34.62 | 34.53 |
| 2,2-Dimethylpentanoic acid                             | 36    | 36.13 |
| 2,2-Dimethylpropane                                    | 26.37 | 25.27 |
| 2,2-Dimethylpropylamine                                | 28.49 | 28.7  |
| 2,2-Propanedithiol                                     | 31.98 | 31.61 |
| 2,3,3,4-Tetramethylpentane                             | 43.2  | 43.71 |
| 2,3,3-Trimethyl-1-butene                               | 33.95 | 34.29 |
| 2,3,3-Trimethyl-1-pentene                              | 38.65 | 38.92 |
| 2,3,3-Trimethyl-2-butanol                              | 35.33 | 35.89 |
| 2,3,3-Trimethylhexane                                  | 43.64 | 43.75 |
| 2,3,3-Trimethylpentane                                 | 38.76 | 39.12 |
| 2,3,4,5,6-Pentafluorotoluene                           | 30.77 | 30.83 |
| 2,3,4,5,6-Pentamethylheptane                           | 56.86 | 57.5  |
| 2,3,4,5-Tetramethylhexane                              | 47.8  | 48.28 |
| 2,3,4-Trichloro-1-butene                               | 34.59 | 34.83 |
| 2,3,4-Trimethyl-2-pentene                              | 38.79 | 39.08 |
| 2,3,4-Trimethylhexane                                  | 43.62 | 43.69 |
| 2,3,4-Trimethylhexanoic acid                           | 45.16 | 45.29 |
| 2,3,4-Trimethylpentane                                 | 38.87 | 39.06 |
| 2,3,4-Trimethylpentanoic acid                          | 40.53 | 40.66 |
| 2,3,5-Trimethylhexane                                  | 43.56 | 43.69 |
| 2,3,6-Collidine                                        | 39    | 38.99 |
| 2,3-Butandione                                         | 21.05 | 21.2  |
| 2,3-Butanediol dinitrate                               | 35.48 | 35.92 |
| 2,3-Butyleneglycol                                     | 23.25 | 23.5  |
| 2,3-Diaminonaphthalene                                 | 51.92 | 52.62 |
| 2,3-Dibromo-1-propene                                  | 30.9  | 30.87 |
| 2,3-Dibromo-2-methylbutane                             | 41.15 | 40.98 |
| 2,3-Dibromobutane                                      | 36.29 | 36.24 |

|                                                |       |       |
|------------------------------------------------|-------|-------|
| 2,3-Dibromoheptane                             | 50.06 | 50.13 |
| 2,3-Dichloro-1,3-butadiene                     | 30.01 | 29.88 |
| 2,3-Dichloro-1-propanol                        | 27.02 | 27    |
| 2,3-Dichloro-2-methylbutane                    | 35.1  | 34.96 |
| 2,3-Dichlorobutane                             | 30.35 | 30.18 |
| 2,3-Dichloropentane                            | 34.89 | 34.81 |
| 2,3-Dichloropropanoyl chloride                 | 30.89 | 31.05 |
| 2,3-Dichloropropene                            | 25.11 | 25.44 |
| 2,3-Dichlorotoluene                            | 41.25 | 40.97 |
| 2,3-Dihydro-1,1,3-trimethyl-3-phenyl-1H-indene | 77.27 | 77.04 |
| 2,3-Dihydro-1,4-dioxin                         | 20.82 | 20.92 |
| 2,3-Dihydro-1H-indole                          | 37.74 | 38.13 |
| 2,3-Dihydro-1-methyl-1H-indene                 | 43.3  | 43.22 |
| 2,3-Dihydro-4H-1-benzothiopyran-4-one          | 47.35 | 47.21 |
| 2,3-Dihydrobenzofuran                          | 36.16 | 35.74 |
| 2,3-Dihydrofuran                               | 19.29 | 19.62 |
| 2,3-Dimercapto-1-propanol                      | 32.93 | 32.77 |
| 2,3-Dimethyl-1,3-butadiene                     | 29.94 | 29.44 |
| 2,3-Dimethyl-1-butene                          | 29.96 | 29.64 |
| 2,3-Dimethyl-1-hexene                          | 39.16 | 38.9  |
| 2,3-Dimethyl-1-pentene                         | 34    | 34.27 |
| 2,3-Dimethyl-2-butanol                         | 31.24 | 31.24 |
| 2,3-Dimethyl-2-hexene                          | 39.1  | 39.12 |
| 2,3-Dimethyl-2-iodobutane                      | 42.71 | 43.14 |
| 2,3-Dimethyl-2-norbornene                      | 39.12 | 39.39 |
| 2,3-Dimethyl-2-pentene                         | 34.2  | 34.49 |
| 2,3-Dimethyl-3-ethylpentane                    | 43.42 | 43.75 |
| 2,3-Dimethyl-3-pentanol                        | 35.94 | 35.87 |
| 2,3-Dimethylbutane                             | 29.82 | 29.84 |
| 2,3-Dimethylbutanoic acid                      | 31.32 | 31.44 |
| 2,3-Dimethyldecane                             | 57.62 | 57.62 |
| 2,3-Dimethyldodecane                           | 66.89 | 66.88 |
| 2,3-Dimethylheptadecane                        | 90.07 | 90.03 |
| 2,3-Dimethylheptane                            | 43.66 | 43.73 |
| 2,3-Dimethylheptanoic acid                     | 45.21 | 45.33 |
| 2,3-Dimethylhexadecane                         | 85.46 | 85.4  |
| 2,3-Dimethylhexane                             | 40.16 | 39.1  |
| 2,3-Dimethylnonadecane                         | 99.34 | 99.29 |
| 2,3-Dimethylnonane                             | 52.97 | 52.99 |
| 2,3-Dimethyloctadecane                         | 94.76 | 94.66 |
| 2,3-Dimethyloctane                             | 48.26 | 48.36 |
| 2,3-Dimethylpentadecane                        | 80.79 | 80.77 |



|                                                 |        |        |
|-------------------------------------------------|--------|--------|
| 2,3-Dimethylpentane                             | 34.34  | 34.47  |
| 2,3-Dimethylpentanoic acid                      | 35.94  | 36.07  |
| 2,3-Dimethyltetradecane                         | 76.22  | 76.14  |
| 2,3-Dimethylthiophene                           | 33.99  | 34.5   |
| 2,3-Dimethyltridecane                           | 71.56  | 71.51  |
| 2,3-Dimethylundecane                            | 62.26  | 62.25  |
| 2,3-Heptanedione                                | 34.93  | 35.09  |
| 2,3-Lutidine                                    | 34.15  | 34.01  |
| 2,3-Pentadiene                                  | 25.24  | 25.36  |
| 2,3-Pentanediol                                 | 28.08  | 28.13  |
| 2,3-Pentanedione                                | 25.45  | 25.83  |
| 2,3-Xylidine                                    | 39.94  | 40.21  |
| 2,4,4-Trimethyl-2-pentanol                      | 40.77  | 40.52  |
| 2,4,4-Trimethyl-2-pentene                       | 39.01  | 39.03  |
| 2,4,4-Trimethylcyclohexanone                    | 41.72  | 41.88  |
| 2,4,4-Trimethylhexane                           | 43.88  | 43.75  |
| 2,4,6,8,10,12-Hexamethylcyclotetrasiloxane      | 85.86  | 85.74  |
| 2,4,6,8-Tetramethylcyclotetrasiloxane           | 57.13  | 57.16  |
| 2,4,6-Collidine                                 | 38.61  | 38.99  |
| 2,4,6-Trimethyl-2,4,6-triphenylcyclotrisiloxane | 115.86 | 115.59 |
| 2,4,6-Trimethyl-3-heptene                       | 48.33  | 48.23  |
| 2,4,6-Trimethylaniline                          | 44.68  | 45.02  |
| 2,4,6-Trimethylchroman                          | 54.37  | 54.41  |
| 2,4,6-Trimethyldecane                           | 62.26  | 62.21  |
| 2,4,6-Trimethyldodecane                         | 71.52  | 71.47  |
| 2,4,6-Trimethyleicosane                         | 108.54 | 108.51 |
| 2,4,6-Trimethylheneicosane                      | 113.17 | 113.14 |
| 2,4,6-Trimethylheptadecane                      | 94.7   | 94.62  |
| 2,4,6-Trimethylhexadecane                       | 90.06  | 89.99  |
| 2,4,6-Trimethylnonadecane                       | 103.94 | 103.88 |
| 2,4,6-Trimethylnonane                           | 57.65  | 57.58  |
| 2,4,6-Trimethyloctadecane                       | 99.36  | 99.25  |
| 2,4,6-Trimethyloctane                           | 52.97  | 52.95  |
| 2,4,6-Trimethylpentadecane                      | 85.42  | 85.36  |
| 2,4,6-Trimethyltetradecane                      | 80.79  | 80.73  |
| 2,4,6-Trimethyltridecane                        | 76.14  | 76.1   |
| 2,4,6-Trimethylundecane                         | 66.87  | 66.84  |
| 2,4-Dibromopentane                              | 40.51  | 40.87  |
| 2,4-Dibromotoluene                              | 46.82  | 46.51  |
| 2,4-Dichlorotoluene                             | 41.19  | 40.97  |
| 2,4-Diethylpyrrole                              | 39.67  | 39.76  |
| 2,4-Diethylpyrrolidine                          | 40.23  | 40.3   |

|                                 |        |        |
|---------------------------------|--------|--------|
| 2,4-Difluoroaniline             | 30.27  | 30.39  |
| 2,4-Dimethyl-1,3-pentadiene     | 34.45  | 34.18  |
| 2,4-Dimethyl-1-pentene          | 34.18  | 34.27  |
| 2,4-Dimethyl-2-pentene          | 34.38  | 34.38  |
| 2,4-Dimethyl-3-ethylpentane     | 43.43  | 43.69  |
| 2,4-Dimethyl-3-isopropylpentane | 48.18  | 48.28  |
| 2,4-Dimethyl-3-pentanol         | 35.84  | 35.89  |
| 2,4-Dimethyl-3-pentanone        | 34.13  | 34.74  |
| 2,4-Dimethylacetophenone        | 45.52  | 45.85  |
| 2,4-Dimethyldecane              | 57.74  | 57.62  |
| 2,4-Dimethyldocosane            | 113.29 | 113.18 |
| 2,4-Dimethyldodecane            | 66.95  | 66.88  |
| 2,4-Dimethyleicosane            | 104.07 | 103.92 |
| 2,4-Dimethylheneicosane         | 108.66 | 108.55 |
| 2,4-Dimethylheptadecane         | 90.11  | 90.03  |
| 2,4-Dimethylheptane             | 44.03  | 43.73  |
| 2,4-Dimethylhexadecane          | 85.48  | 85.4   |
| 2,4-Dimethylhexane              | 39.07  | 39.1   |
| 2,4-Dimethylhexanoic acid       | 40.59  | 40.7   |
| 2,4-Dimethylnitrobenzene        | 42.26  | 42.81  |
| 2,4-Dimethylnonadecane          | 99.46  | 99.29  |
| 2,4-Dimethylnonane              | 53.07  | 52.99  |
| 2,4-Dimethyloctadecane          | 94.79  | 94.66  |
| 2,4-Dimethyloctane              | 48.69  | 48.36  |
| 2,4-Dimethyloxazole             | 26.09  | 25.52  |
| 2,4-Dimethylpentadecane         | 80.85  | 80.77  |
| 2,4-Dimethylpentane             | 34.63  | 34.47  |
| 2,4-Dimethylpentanoic acid      | 35.94  | 36.07  |
| 2,4-Dimethylpyrrole             | 30.54  | 30.5   |
| 2,4-Dimethylpyrrolidine         | 31.67  | 31.04  |
| 2,4-Dimethylquinoline           | 51.2   | 51.58  |
| 2,4-Dimethylsulfolane           | 36.61  | 36.49  |
| 2,4-Dimethyltetradecane         | 76.22  | 76.14  |
| 2,4-Dimethylthiazole            | 32     | 31.38  |
| 2,4-Dimethylthiophene           | 33.79  | 34.5   |
| 2,4-Dimethyltridecane           | 71.59  | 71.51  |
| 2,4-Dimethylundecane            | 62.34  | 62.25  |
| 2,4-Dinitroanisole              | 46.95  | 46.38  |
| 2,4-Hexanedione                 | 32.09  | 31.25  |
| 2,4-Lutidine                    | 33.91  | 34.01  |
| 2,4-Pentanediol                 | 28.2   | 28.13  |
| 2,4-Xylenol                     | 37.46  | 37.91  |

|                                |       |       |
|--------------------------------|-------|-------|
| 2,4-Xylidine                   | 39.87 | 40.21 |
| 2,5,5-Trimethylheptane         | 48.39 | 48.38 |
| 2,5,8,11-Tetraoxododecane      | 45.97 | 45.88 |
| 2,5-Aldehydine                 | 38.54 | 38.64 |
| 2,5-Dibromoheptane             | 50.18 | 50.13 |
| 2,5-Dibromooctane              | 55.05 | 54.76 |
| 2,5-Dibromothiophene           | 40.13 | 40.11 |
| 2,5-Dibromotoluene             | 47.06 | 46.51 |
| 2',5'-Dichloroacetophenone     | 46.24 | 45.87 |
| 2,5-Dichlorostyrene            | 46.21 | 45.29 |
| 2,5-Dichlorothiophene          | 34.44 | 34.23 |
| 2,5-Dichlorotoluene            | 40.61 | 40.97 |
| 2,5-Diethylpyrrole             | 39.28 | 39.67 |
| 2,5-Dihydro-1H-pyrrole         | 21.06 | 21.69 |
| 2,5-Dihydro-2,5-dimethoxyfuran | 31.58 | 32.27 |
| 2',5'-Dimethoxyacetophenone    | 49.95 | 49.27 |
| 2,5-Dimethyl-1,5-hexadiene     | 39.09 | 38.7  |
| 2,5-Dimethyl-2,5-hexanediamine | 45.33 | 45.9  |
| 2,5-Dimethyl-2-hexene          | 39.04 | 39.01 |
| 2,5-Dimethyl-4-hendecene       | 61.94 | 62.16 |
| 2,5-Dimethyl-5-undecanol       | 63.47 | 63.65 |
| 2,5-Dimethylacetophenone       | 45.89 | 45.85 |
| 2,5-Dimethylbenzoxazole        | 42.52 | 42.88 |
| 2,5-Dimethylfuran              | 28.31 | 28.49 |
| 2,5-Dimethylheptane            | 43.51 | 43.73 |
| 2,5-Dimethylhexane             | 39.46 | 39.1  |
| 2,5-Dimethyloctane             | 48.66 | 48.36 |
| 2,5-Dimethyloxazole            | 25.63 | 25.65 |
| 2,5-Dimethylpyrazine           | 32.06 | 31.88 |
| 2,5-Dimethylpyrrole            | 30.1  | 30.41 |
| 2,5-Dimethyltetrahydrofuran    | 28.76 | 29.49 |
| 2,5-Dimethylthiophene          | 34.23 | 34.79 |
| 2,5-Dimethylundecane           | 62.09 | 62.25 |
| 2,5-Dioxaheptane               | 28.8  | 28.64 |
| 2,5-Dipropyl-3-ethylthiophane  | 63.61 | 63.42 |
| 2,5-Dipropyl-3-methylthiophane | 58.62 | 58.79 |
| 2,5-Dipropylpyrrole            | 48.86 | 48.93 |
| 2,5-Di-t-butylfuran            | 56.57 | 56.23 |
| 2,5-Hexanediol                 | 32.89 | 32.76 |
| 2,5-Lutidine                   | 33.93 | 34.01 |
| 2,5-Xylidine                   | 39.97 | 40.21 |
| 2,6-Dichloroaniline            | 40.31 | 40.23 |

|                                    |        |        |
|------------------------------------|--------|--------|
| 2,6-Dichloroanisole                | 43.22  | 42.68  |
| 2,6-Dichlorotoluene                | 40.48  | 40.97  |
| 2,6-Difluoropyridine               | 23.78  | 23.46  |
| 2,6-Diisopropylaniline             | 58.55  | 58.65  |
| 2,6-Diisopropylphenol              | 56.2   | 56.35  |
| 2,6-Dimethyl-2-heptanol            | 44.99  | 45.13  |
| 2,6-Dimethyl-2-heptene             | 43.71  | 43.64  |
| 2,6-Dimethyl-4-ethylpyridine       | 43.49  | 43.62  |
| 2,6-Dimethyl-4-heptanol            | 45.39  | 45.15  |
| 2,6-Dimethylanisole                | 42.02  | 42.66  |
| 2,6-Dimethylchroman                | 50.13  | 49.82  |
| 2,6-Dimethylcyclohexanone          | 36.38  | 37.23  |
| 2,6-Dimethylheptan-4-one           | 43.86  | 44     |
| 2,6-Dimethylheptane                | 43.97  | 43.73  |
| 2,6-Dimethylmorpholine             | 32.92  | 32.7   |
| 2,6-Dimethyloctane                 | 48.17  | 48.36  |
| 2,6-Dimethylpentamethylene sulfide | 40.52  | 40.31  |
| 2,6-Dimethylpiperidine             | 36.41  | 35.64  |
| 2,6-Dinitrotoluene                 | 44.17  | 44.67  |
| 2,6-Di-t-butyl-p-cresol            | 70.78  | 70.46  |
| 2,6-Di-t-butylpyridine             | 62.99  | 61.92  |
| 2,6-Lutidine                       | 33.89  | 34.18  |
| 2,6-Nonadien-1-ol                  | 44.62  | 44.82  |
| 2,6-Xylidine                       | 39.87  | 40.21  |
| 2,7-Dimethyloctane                 | 48.8   | 48.36  |
| 2,9-Dimethyl-5,6-diisoamyldecane   | 103.38 | 103.76 |
| 2-Acetoxy-4-oxa-6-oxononane        | 51.98  | 52.16  |
| 2-Acetoxyanisole                   | 44.05  | 44.26  |
| 2-Acetoxyethylphosphine            | 32.21  | 32.4   |
| 2-Acetylfuran                      | 29.58  | 28.65  |
| 2-Acetylthiophene                  | 35.28  | 34.7   |
| 2-Allylphenol                      | 41.33  | 42.05  |
| 2-Amino-1-butanol                  | 26.09  | 25.43  |
| 2-Aminoisobutanol                  | 25.6   | 25.43  |
| 2-Anisaldehyde                     | 38.87  | 38.37  |
| 2-Benzylpyridine                   | 52.67  | 53.76  |
| 2-Benzyltetrahydropyran            | 53.76  | 54.04  |
| 2-Benzylthiophene                  | 53.56  | 54.36  |
| 2-Bromo-1,1,1-trifluoroethane      | 18.75  | 19.42  |
| 2-Bromo-1,1-diethoxyethane         | 40.38  | 40.88  |
| 2-Bromo-1,1-dimethoxyethane        | 31.46  | 31.56  |
| 2-Bromo-1,3,5-trimethylbenzene     | 48.16  | 48.54  |

|                                        |       |       |
|----------------------------------------|-------|-------|
| 2-Bromo-1,3-butadiene                  | 27.94 | 27.45 |
| 2-Bromo-1-butene                       | 27.61 | 27.76 |
| 2-Bromo-1-chloro-3,3-dimethylbutane    | 43.56 | 42.49 |
| 2-Bromo-1-chloropropane                | 29.07 | 28.62 |
| 2-Bromo-1-phenyl-1-propanone           | 49.04 | 48.65 |
| 2-Bromo-2-chloro-1,1,1-trifluoroethane | 24.03 | 24.16 |
| 2-Bromo-2-chloro-4,4-dimethylpentane   | 47.97 | 47.56 |
| 2-Bromo-2-chlorobutane                 | 33.6  | 33.69 |
| 2-Bromo-2-chloropropane                | 28.71 | 29.06 |
| 2-Bromo-2-methylbutane                 | 33.4  | 33.19 |
| 2-Bromo-2-methylpropane                | 28.9  | 28.56 |
| 2-Bromo-3,3-difluoro-2-propen-1-ol     | 24.36 | 24.14 |
| 2-Bromo-3-methyl-1-butene              | 32.51 | 32.35 |
| 2-Bromo-4-methylaniline                | 42.15 | 42.99 |
| 2-Bromo-4-methylphenol                 | 40.2  | 40.69 |
| 2-Bromo-4-phenyl-1-butene              | 51.71 | 52.32 |
| 2-Bromo-5-chlorothiophene              | 37.09 | 37.17 |
| 2-Bromoallyl alcohol                   | 24.85 | 24.54 |
| 2-Bromoaniline                         | 37.86 | 38.18 |
| 2-Bromoanisole                         | 41.02 | 40.63 |
| 2-Bromobutane                          | 28.5  | 28.45 |
| 2-Bromobutanoic acid                   | 29.84 | 30.05 |
| 2-Bromodecanoic acid                   | 57.7  | 57.83 |
| 2-Bromododecanoic acid                 | 66.46 | 67.09 |
| 2-Bromoethanesulfonylchloride          | 33.06 | 32.98 |
| 2-Bromoethanol                         | 20.55 | 20.55 |
| 2-Bromohexane                          | 37.37 | 37.71 |
| 2-Bromiodobenzene                      | 46.37 | 46.68 |
| 2-Bromoisobutyronitrile                | 28.11 | 28.35 |
| 2-Bromo-N,N-dimethylaniline            | 47.76 | 48.13 |
| 2-Bromonaphthalene                     | 51.77 | 52.07 |
| 2-Bromooctane                          | 47.18 | 46.97 |
| 2-Bromopentane                         | 33.05 | 33.08 |
| 2-Bromopropane                         | 23.94 | 23.82 |
| 2-Bromopropanoic acid                  | 25.35 | 25.42 |
| 2-Bromopropanoyl chloride              | 28.59 | 29.28 |
| 2-Bromopropene                         | 23.13 | 23.13 |
| 2-Bromothiophene                       | 32.53 | 32.46 |
| 2-Bromotoluene                         | 38.66 | 38.92 |
| 2-Butanethiol                          | 28.46 | 28.32 |
| 2-Butanol                              | 22.18 | 22.08 |
| 2-Butanone                             | 20.82 | 20.93 |

|                                                   |       |       |
|---------------------------------------------------|-------|-------|
| 2-Butanone ketazine                               | 45.29 | 45.3  |
| 2-Butanone O-ethyloxime                           | 34.68 | 34.73 |
| 2-Butanone O-propyloxime                          | 39.11 | 39.36 |
| 2-Buten-1-ol                                      | 21.81 | 21.87 |
| 2-Butenoyl chloride                               | 26.26 | 25.92 |
| 2-Butoxy-2-bora-1,3-dioxacyclopentane             | 37.13 | 36.61 |
| 2-Butoxy-4,4-bis(ethylthio)-butane                | 75.34 | 75.18 |
| 2-Butoxy-4-methyl-1,3,2-dioxaphospholane          | 45.46 | 45.64 |
| 2-Butoxyphenol                                    | 48.56 | 48.73 |
| 2-Butoxypyridine                                  | 45.05 | 45.22 |
| 2-Butoxyvinyl bis(diethylamino) phosphorus oxide  | 83.58 | 83.71 |
| 2-Butoxyvinyl bis(dimethylamino) phosphorus oxide | 65.43 | 65.35 |
| 2-Butoxyvinyl diethoxy phosphorus oxide           | 61.73 | 62.08 |
| 2-Butoxyvinyl dimethoxy phosphorus oxide          | 53.58 | 52.76 |
| 2-Butyl-2-ethyl-1,3-propanediol                   | 47.23 | 46.61 |
| 2-Butyl-3-ethyl-5-propylthiophane                 | 67.8  | 68.05 |
| 2-Butylamine                                      | 24.1  | 24.02 |
| 2-Butylbiphenyl                                   | 70.33 | 69.96 |
| 2-Butylnaphthalene                                | 63.37 | 63.18 |
| 2-Butylphenol                                     | 46.69 | 46.99 |
| 2-Butylsilane                                     | 31.02 | 31.09 |
| 2-Butyltetrahydropyran                            | 43.33 | 43.37 |
| 2-Butylthiophene                                  | 43.27 | 43.69 |
| 2-Butylthiovinyl diallyloxy phosphorus oxide      | 75.88 | 76.99 |
| 2-Butylthiovinyl dibutoxy phosphorus oxide        | 86.33 | 86.87 |
| 2-Butylthiovinyl dichloro phosphorus oxide        | 57.85 | 57.54 |
| 2-Butyn-1-al                                      | 19.59 | 19.68 |
| 2-Butyn-1-ol                                      | 20.22 | 20.57 |
| 2-Butyne                                          | 18.64 | 19.16 |
| 2-Butynedinitrile                                 | 18.41 | 18.74 |
| 2-Butyrylthiophene                                | 44.41 | 43.96 |
| 2-Chloro-1,1,1-trifluoroethane                    | 16.39 | 16.48 |
| 2-Chloro-1,1-diethoxyethane                       | 37.7  | 37.94 |
| 2-Chloro-1,1-difluoro-4-iodo-1-butene             | 37.38 | 37.75 |
| 2-Chloro-1,1-dimethoxyethane                      | 29.21 | 28.62 |
| 2-Chloro-1,3-propanediol                          | 23.89 | 23.61 |
| 2-Chloro-1-butanol                                | 26.99 | 26.83 |
| 2-Chloro-1-butene                                 | 24.98 | 25.27 |
| 2-Chloro-1-ethylbenzene                           | 40.56 | 40.78 |
| 2-Chloro-1-propanol                               | 22.55 | 22.2  |
| 2-Chloro-1-trichloromethoxybenzene                | 52.53 | 52.39 |
| 2-Chloro-1-trifluoromethoxybenzene                | 37.65 | 37.44 |

|                                              |       |       |
|----------------------------------------------|-------|-------|
| 2-Chloro-1-trifluoromethylbenzene            | 35.59 | 36.43 |
| 2-Chloro-2,4,4-trimethylpentane              | 43.99 | 44.07 |
| 2-Chloro-2-methylbutane                      | 30.23 | 30.2  |
| 2-Chloro-2-methylpropanal                    | 25.39 | 26.09 |
| 2-Chloro-2-methylpropane                     | 25.81 | 25.57 |
| 2-Chloro-2-propenenitrile                    | 20.58 | 20.43 |
| 2-Chloro-3,3-difluoro-2-propen-1-ol          | 21.97 | 21.65 |
| 2-Chloro-4-methylaniline                     | 40.64 | 40.22 |
| 2-Chloro-4-methylpentane                     | 34.81 | 34.64 |
| 2-Chloro-5-(trifluoromethyl)aniline          | 40.11 | 40.5  |
| 2-Chloro-6-phenylphenol                      | 58.25 | 57.85 |
| 2-Chloroacetophenone                         | 40.39 | 41.05 |
| 2-Chloroacrolein                             | 20.79 | 21.16 |
| 2-Chloroacrylaldehyde                        | 20.79 | 21.04 |
| 2-Chloroallyl alcohol                        | 21.76 | 22.05 |
| 2-Chloroaniline                              | 35.76 | 35.41 |
| 2-Chloroanisole                              | 38.02 | 37.86 |
| 2-Chlorobenzaldehyde                         | 36.74 | 36.67 |
| 2-Chlorobenzyl chloride                      | 40.58 | 40.95 |
| 2-Chlorobutane                               | 25.53 | 25.42 |
| 2-Chlorobutanoic acid                        | 27.44 | 27.02 |
| 2-Chlorobutanoic acid methylester            | 31.1  | 31.77 |
| 2-Chlorocrotonaldehyde                       | 25.95 | 25.9  |
| 2-Chlorocyclohexanone                        | 32.62 | 32.81 |
| 2-Chlorocyclopentanone                       | 28.17 | 28.18 |
| 2-Chloroethanesulfonyl chloride              | 30.41 | 30.04 |
| 2-Chloroethanol                              | 17.72 | 17.61 |
| 2-Chloroethyl acetoacetate                   | 36.2  | 36.74 |
| 2-Chloroethyl chloroformate                  | 27.66 | 27.6  |
| 2-Chloroethyl crotonate                      | 36.38 | 36.27 |
| 2-Chloroethyl ethyl ether                    | 27.26 | 27.15 |
| 2-Chloroethyl vinyl ether                    | 26.64 | 26.45 |
| 2-Chloroethylsulfonyl fluoride               | 25.42 | 25.82 |
| 2-Chloroethylthiobenzene                     | 49.02 | 49.07 |
| 2-Chloroheptane                              | 39.47 | 39.31 |
| 2-Chlorohexane                               | 34.68 | 34.68 |
| 2-Chloriodobenzene                           | 43.64 | 43.91 |
| 2-Chloroisopropylacetate                     | 32.19 | 32.26 |
| 2-Chloro-N-(2-chloroethyl)-N-ethylethanamine | 43.32 | 43.34 |
| 2-Chloro-N,N-diallylacetamide                | 46.4  | 47.12 |
| 2-Chloro-N,N-dimethylaniline                 | 45.32 | 45.36 |
| 2-Chloronaphthalene                          | 49.42 | 49.3  |

|                                          |        |       |
|------------------------------------------|--------|-------|
| 2-Chlorooctane                           | 44.12  | 43.94 |
| 2-Chloro-p-cresol                        | 36.78  | 37.92 |
| 2-Chloropentane                          | 30.16  | 30.05 |
| 2-Chloropentanoic acid                   | 32.01  | 31.65 |
| 2-Chlorophenol                           | 32.53  | 33.11 |
| 2-Chloropropanal                         | 20.26  | 21.31 |
| 2-Chloropropane                          | 21     | 20.79 |
| 2-Chloropropanoic acid                   | 22.64  | 22.39 |
| 2-Chloropropene                          | 20.45  | 20.64 |
| 2-Chloropyridine                         | 29.2   | 29.27 |
| 2-Chloroquinoline                        | 46.95  | 46.84 |
| 2-Chlorostyrene                          | 41.03  | 40.47 |
| 2-Chlorothiophene                        | 29.31  | 29.52 |
| 2-Chlorotoluene                          | 35.94  | 36.15 |
| 2-Cyanobutane                            | 25.09  | 25.04 |
| 2-Cyanoethanol                           | 17.46  | 17.23 |
| 2-Cyanopropan-2-ol                       | 21.66  | 21.81 |
| 2-Cyclohexen-1-ol                        | 28.05  | 29    |
| 2-Cyclohexene-1-one                      | 28.81  | 27.85 |
| 2-Cyclohexyl-2-methylpentadecane         | 101.72 | 101.8 |
| 2-Cyclohexylcyclohexanone                | 53.54  | 53.61 |
| 2-Cyclohexyltetradecane                  | 92.84  | 92.52 |
| 2-Cyclohexyltetrahydropyran              | 50.64  | 50.45 |
| 2-Cyclohexylthiacyclohexane              | 56.47  | 56.66 |
| 2-Cyclopenten-1-one                      | 22.86  | 23.22 |
| 2-Cyclopentylidenecyclopentanone         | 44.97  | 44.37 |
| 2-Cyclopentylthiacyclohexane             | 52.21  | 52.03 |
| 2-Decanol                                | 49.82  | 49.86 |
| 2-Decanone                               | 48.5   | 48.71 |
| 2-Decyn-1-ol                             | 47.91  | 48.35 |
| 2-Diethylaminoethanol                    | 34.7   | 35.15 |
| 2-Diethylaminoethylamine                 | 36.55  | 37.17 |
| 2-Dodecanol                              | 59.27  | 59.12 |
| 2-Dodecanone                             | 58.44  | 57.97 |
| 2-Ethoxy-1,2-diphenylethanone            | 71.85  | 71.75 |
| 2-Ethoxy-3,4-dihydro-2H-pyran            | 34.93  | 35.04 |
| 2-Ethoxy-4-methyl-1,3,2-dioxaphospholane | 36.23  | 36.38 |
| 2-Ethoxyethanamine                       | 25.95  | 25.78 |
| 2-Ethoxyethanol                          | 24.05  | 23.76 |
| 2-Ethoxyethyl acrylate                   | 37.69  | 37.68 |
| 2-Ethoxyethylacetate                     | 33.29  | 33.36 |
| 2-Ethoxymethylthiophene                  | 40.19  | 40.75 |



|                                                   |        |        |
|---------------------------------------------------|--------|--------|
| 2-Ethoxynaphthalene                               | 55.19  | 55.66  |
| 2-Ethoxythiophene                                 | 35.73  | 35.58  |
| 2-Ethoxyvinyl bis(dibutylamino) phosphorus oxide  | 110.37 | 111.49 |
| 2-Ethoxyvinyl bis(dimethylamino) phosphorus oxide | 56.12  | 56.09  |
| 2-Ethyl-1,3,5-trimethylbenzene                    | 50     | 50.39  |
| 2-Ethyl-1,3-butadiene                             | 29.77  | 29.37  |
| 2-Ethyl-1-butanol                                 | 31.19  | 31.29  |
| 2-Ethyl-1-butene                                  | 29.39  | 29.68  |
| 2-Ethyl-1-hexanol                                 | 40.44  | 40.55  |
| 2-Ethyl-1-pentene                                 | 34     | 34.31  |
| 2-Ethyl-2 methyl-5-propylthiophane                | 54.53  | 54.58  |
| 2-Ethyl-2-methyl-5-propyltetrahydrofuran          | 48.09  | 47.95  |
| 2-Ethyl-3-methyl-1-butene                         | 34.02  | 34.27  |
| 2-Ethyl-3-methyl-1-pentene                        | 38.69  | 38.9   |
| 2-Ethyl-3-methyl-5-propylthiophane                | 54.54  | 54.16  |
| 2-Ethyl-3-propyl-1,4-dioxane                      | 44.81  | 45.07  |
| 2-Ethyl-4-isopropylpyrrolidine                    | 44.82  | 44.89  |
| 2-Ethyl-4-methylpyrrole                           | 34.93  | 35.13  |
| 2-Ethyl-4-methylpyrrolidine                       | 36.15  | 35.67  |
| 2-Ethyl-4-oxo-1-heptanol                          | 45.11  | 45.45  |
| 2-Ethyl-5-methylthiophane                         | 40.38  | 40.31  |
| 2-Ethyl-5-methylthiophane sulfone                 | 40.81  | 41.15  |
| 2-Ethyl-5-propylpyrrole                           | 44.23  | 44.3   |
| 2-Ethyl-5-propylthiophane                         | 49.46  | 49.57  |
| 2-Ethyl-5-propylthiophane sulfone                 | 49.69  | 50.41  |
| 2-Ethyl-6-methylaniline                           | 44.67  | 44.84  |
| 2-Ethylaniline                                    | 39.77  | 40.03  |
| 2-Ethylbutanoic acid                              | 31.36  | 31.48  |
| 2-Ethylbutyl acetate                              | 40.73  | 40.89  |
| 2-Ethylbutyryl chloride                           | 34.92  | 35.34  |
| 2-Ethylfuran                                      | 28.11  | 28.38  |
| 2-Ethylheptanoic acid                             | 45.25  | 45.37  |
| 2-Ethylhexanal                                    | 39.66  | 39.66  |
| 2-Ethylhexanoic acid                              | 40.76  | 40.74  |
| 2-Ethylhexanoyl chloride                          | 45.07  | 44.6   |
| 2-Ethylhexyl acetate                              | 50.05  | 50.15  |
| 2-Ethylhexyl acrylate                             | 54.45  | 54.47  |
| 2-Ethylhexyl methacrylate                         | 58.92  | 59.17  |
| 2-Ethyl-m-xylene                                  | 45.34  | 45.58  |
| 2-Ethyl-naphthalene                               | 53.88  | 53.92  |
| 2-Ethyl-nitrobenzene                              | 42.03  | 42.63  |
| 2-Ethyl-nonanoic acid                             | 54.51  | 54.63  |

|                                                      |       |       |
|------------------------------------------------------|-------|-------|
| 2-Ethyl octanoic acid                                | 49.88 | 50    |
| 2-Ethylpentamethylene sulfide                        | 40.33 | 40.32 |
| 2-Ethylpentanoic acid                                | 35.95 | 36.11 |
| 2-Ethyl-p-xylene                                     | 45.54 | 45.58 |
| 2-Ethylpyridine                                      | 32.97 | 33.83 |
| 2-Ethylstyrene                                       | 45.86 | 45.09 |
| 2-Ethyltetrahydrofuran                               | 29.25 | 29.48 |
| 2-Ethyltetrahydropyran                               | 34.07 | 34.11 |
| 2-Ethylthioethanol                                   | 30.03 | 29.99 |
| 2-Ethylthiophene                                     | 33.92 | 34.43 |
| 2-Ethylthiovinyl bis(ethoxyethoxy) phosphorus oxide  | 81.19 | 80.99 |
| 2-Ethylthiovinyl bis(methoxyethoxy) phosphorus oxide | 71.71 | 71.67 |
| 2-Ethylthiovinyl diallyloxy phosphorus oxide         | 67    | 67.73 |
| 2-Ethylthiovinyl dibutoxy phosphorus oxide           | 78.43 | 77.61 |
| 2-Ethylthiovinyl dichloro phosphorus oxide           | 48.4  | 48.28 |
| 2-Ethylthiovinyl dihexoxy phosphorus oxide           | 95.16 | 96.13 |
| 2-Ethylthiovinyl dipropoxy phosphorus oxide          | 67.85 | 68.35 |
| 2-Ethyltoluene                                       | 40.45 | 40.77 |
| 2-Fluoro-1,1,2-trichloroethane                       | 25.87 | 25.97 |
| 2-Fluoro-1,3-butadiene                               | 20.75 | 19.94 |
| 2-Fluoro-1-phenylethanone                            | 36.46 | 36.15 |
| 2-Fluoro-2-methylbutane                              | 24.93 | 25.14 |
| 2-Fluoro-4-methylpyridine                            | 28.64 | 28.65 |
| 2-Fluoro-6-methylpyridine                            | 28.67 | 28.82 |
| 2-Fluoroaniline                                      | 30.38 | 30.49 |
| 2-Fluoroanisole                                      | 32.12 | 32.94 |
| 2-Fluorobenzaldehyde                                 | 32.21 | 31.75 |
| 2-Fluorobenzotrifluoride                             | 31.04 | 31.51 |
| 2-Fluorobenzoyl chloride                             | 37.26 | 36.69 |
| 2-Fluoroethanol                                      | 12.96 | 12.73 |
| 2-Fluoronitrobenzene                                 | 33.78 | 33.09 |
| 2-Fluorophenylethylether                             | 37.47 | 37.6  |
| 2-Fluoropyridine                                     | 23.46 | 23.84 |
| 2-Fluorotoluene                                      | 30.62 | 31.23 |
| 2-Formylnaphthalene                                  | 50.99 | 49.81 |
| 2-Furancarbonitrile                                  | 24.43 | 23.54 |
| 2-Furanmethanethiol                                  | 31.3  | 31.42 |
| 2-Furfurylamine                                      | 26.63 | 27.18 |
| 2-Heptanamine                                        | 38.03 | 37.91 |
| 2-Heptanol                                           | 36.08 | 35.97 |
| 2-Heptanone                                          | 34.79 | 34.82 |
| 2-Heptanoylthiophene                                 | 58.44 | 57.85 |

|                                            |       |       |
|--------------------------------------------|-------|-------|
| 2-Heptenal                                 | 34.68 | 34.87 |
| 2-Heptyl bromide                           | 42.71 | 42.34 |
| 2-Heptylnaphthalene                        | 77.41 | 77.07 |
| 2-Heptylthiophene                          | 57.25 | 57.58 |
| 2-Heptyne                                  | 32.92 | 33.05 |
| 2-Hexanethiol                              | 37.72 | 37.58 |
| 2-Hexanol                                  | 31.32 | 31.34 |
| 2-Hexanoylthiophene                        | 53.8  | 53.22 |
| 2-Hexenoic acid                            | 31.54 | 31.32 |
| 2-Hexoxy-4-methyl-1,3,2-dioxaphospholane   | 54.73 | 54.9  |
| 2-Hexylnaphthalene                         | 72.75 | 72.44 |
| 2-Hexylthiacyclohexane                     | 59    | 58.84 |
| 2-Hexylthiophene                           | 52.63 | 52.95 |
| 2-Hexyne                                   | 28.05 | 28.42 |
| 2-Hydroxy-1-phenyl-1-propanone             | 42.24 | 42.28 |
| 2-Hydroxy-2-dibutylphosphonato-3-butanone  | 70.52 | 70.66 |
| 2-Hydroxy-2-diethylphosphonato-3-butanone  | 52.3  | 52.14 |
| 2-Hydroxy-2-dimethylphosphonato-3-butanone | 42.78 | 42.82 |
| 2-Hydroxy-5-methylbenzaldehyde             | 39.57 | 38.43 |
| 2-Hydroxyacetophenone                      | 38.84 | 38    |
| 2-Hydroxybenzaldehyde                      | 34.52 | 33.62 |
| 2-Hydroxybenzonitrile                      | 33.67 | 32.89 |
| 2-Hydroxybicyclopentyl                     | 45.45 | 45.5  |
| 2-Hydroxyethylammonium acetate             | 29.31 | 28.99 |
| 2-hydroxyethylammonium butanoate           | 38.53 | 38.25 |
| 2-Hydroxyethylammonium formate             | 24.85 | 24.7  |
| 2-Hydroxyethylammonium hexanoate           | 47.8  | 47.51 |
| 2-Hydroxyethylammonium lactate             | 34.69 | 35.04 |
| 2-Hydroxyethylammonium pentanoate          | 43.12 | 42.88 |
| 2-Hydroxyethylammonium propionate          | 33.29 | 33.62 |
| 2-Hydroxyethylmethacrylate                 | 32.51 | 32.84 |
| 2-Hydroxyethylphosphine                    | 22.67 | 22.8  |
| 2-Hydroxythiophene                         | 25.97 | 26.17 |
| 2-Indanone                                 | 38.59 | 38.9  |
| 2-Iodo-2-methylbutane                      | 38.87 | 38.55 |
| 2-Iodo-2-methylpropane                     | 33.97 | 33.92 |
| 2-Iodoacetophenone                         | 49.37 | 48.8  |
| 2-Iodobutane                               | 33.94 | 33.87 |
| 2-Iodoethanol                              | 25.73 | 25.69 |
| 2-Iodonaphthalene                          | 57.9  | 57.05 |
| 2-Iodooctane                               | 52.35 | 52.39 |
| 2-Iodopropane                              | 29.48 | 29.24 |

|                                                       |        |        |
|-------------------------------------------------------|--------|--------|
| 2-Iodotoluene                                         | 44.01  | 43.9   |
| 2-Isoamyloxyvinyl bis(dibutylamino) phosphorus oxide  | 124.87 | 125.34 |
| 2-Isobutylfuran                                       | 37.37  | 37.6   |
| 2-Isobutyltetrahydrofuran                             | 38.76  | 38.7   |
| 2-Isobutyrylthiophene                                 | 44.57  | 43.92  |
| 2-Isopropoxyethanol                                   | 28.55  | 28.4   |
| 2-Isopropoxyvinyl bis(dimethylamino) phosphorus oxide | 60.81  | 60.73  |
| 2-Isopropyl-5-methylphenol                            | 47.29  | 47.13  |
| 2-Isopropyl-naphthalene                               | 58.49  | 58.51  |
| 2-Isopropyl-p-cresol                                  | 46.64  | 47.13  |
| 2-Isopropyltetrahydropyran                            | 38.63  | 38.7   |
| 2-Isopropyltoluene                                    | 45.08  | 45.36  |
| 2-Mercaptoethanol                                     | 20.61  | 20.48  |
| 2-Methoxy-1,1'-biphenyl                               | 58.57  | 57.78  |
| 2-Methoxy-1,3-butadiene                               | 27.02  | 26.05  |
| 2-Methoxy-1-phenylethanone                            | 43.19  | 42.52  |
| 2-Methoxy-1-propanol                                  | 23.65  | 23.74  |
| 2-Methoxy-4-methyl-1,3,2-dioxaphospholane             | 31.52  | 31.72  |
| 2-Methoxyaniline                                      | 37.04  | 37.11  |
| 2-Methoxybenzenemethanamine                           | 41.42  | 41.28  |
| 2-Methoxyethyl acetate                                | 28.44  | 28.7   |
| 2-Methoxymethylthiophene                              | 35.42  | 36.09  |
| 2-Methoxynitrobenzene                                 | 39.55  | 39.71  |
| 2-Methoxy-p-cresol                                    | 39.19  | 39.62  |
| 2-Methoxyphenol                                       | 34.66  | 34.81  |
| 2-Methoxypyridine                                     | 30.91  | 31.3   |
| 2-Methoxystyrene                                      | 41.82  | 42.17  |
| 2-Methoxythiophene                                    | 30.98  | 30.92  |
| 2-Methyl-1,2-propanediamine                           | 27.68  | 27.45  |
| 2-Methyl-1,2-propanediol                              | 23.46  | 23.43  |
| 2-Methyl-1,3-cyclohexadiene                           | 31.58  | 32.08  |
| 2-Methyl-1,3-dioxolane                                | 21.94  | 21.74  |
| 2-Methyl-1,3-propanediol                              | 23.63  | 23.44  |
| 2-Methyl-1,4-dibromobutane                            | 40.37  | 40.73  |
| 2-Methyl-1,5-dibromopentane                           | 45.12  | 45.36  |
| 2-Methyl-1,5-hexadiene                                | 33.9   | 34     |
| 2-Methyl-1,5-pentanediol                              | 32.85  | 32.7   |
| 2-Methyl-1-butanethiol                                | 32.88  | 32.92  |
| 2-Methyl-1-butanol                                    | 26.75  | 26.66  |
| 2-Methyl-1-butyl acetate                              | 36.43  | 36.26  |
| 2-Methyl-1-heptanol                                   | 41.43  | 40.55  |

|                                                        |        |        |
|--------------------------------------------------------|--------|--------|
| 2-Methyl-1-heptene                                     | 39.33  | 38.94  |
| 2-Methyl-1-hexanol                                     | 35.79  | 35.92  |
| 2-Methyl-1-hexene                                      | 34.27  | 34.31  |
| 2-Methyl-1H-indene                                     | 43.55  | 43.13  |
| 2-Methyl-1-nonene                                      | 48.3   | 48.2   |
| 2-Methyl-1-octene                                      | 43.36  | 43.57  |
| 2-Methyl-1-pentanol                                    | 31.18  | 31.29  |
| 2-Methyl-1-pentene                                     | 29.48  | 29.68  |
| 2-Methyl-1-phenyl-1-propanone                          | 45.48  | 45.45  |
| 2-Methyl-1-propanethiol                                | 28.37  | 28.29  |
| 2-Methyl-1-propanol                                    | 22.19  | 22.03  |
| 2-Methyl-1-undecanol                                   | 58.96  | 59.07  |
| 2-Methyl-2-butanamine                                  | 28.61  | 28.65  |
| 2-Methyl-2-butanol                                     | 26.7   | 26.65  |
| 2-Methyl-2-chloropentadecane                           | 81.34  | 81.13  |
| 2-Methyl-2-cyclohexen-1-one                            | 32.58  | 32.55  |
| 2-Methyl-2-cyclopenten-1-one                           | 27.65  | 27.92  |
| 2-Methyl-2-heptanol                                    | 40.9   | 40.54  |
| 2-Methyl-2-heptene                                     | 39.19  | 39.05  |
| 2-Methyl-2-hexanol                                     | 36.03  | 35.91  |
| 2-Methyl-2-hexene                                      | 34.61  | 34.42  |
| 2-Methyl-2-octanol                                     | 45.21  | 45.17  |
| 2-Methyl-2-pentadecanol                                | 77.79  | 77.58  |
| 2-Methyl-2-pentanol                                    | 30.32  | 31.28  |
| 2-Methyl-2-pentenal                                    | 30.67  | 30.31  |
| 2-Methyl-2-pentene                                     | 29.76  | 29.79  |
| 2-Methyl-2-phenyloxirane                               | 40.09  | 40.09  |
| 2-Methyl-2-phenylpentadecane                           | 100.25 | 100.76 |
| 2-Methyl-2-propanol                                    | 22.17  | 22.02  |
| 2-Methyl-2-propenol                                    | 21.68  | 21.83  |
| 2-Methyl-3-amino-4-methoxymethyl-5-aminomethylpyridine | 53.2   | 52.61  |
| 2-Methyl-3-butyne-2-ol                                 | 24.74  | 24.61  |
| 2-Methyl-3-heptanol                                    | 40.56  | 40.56  |
| 2-Methyl-3-hexanone                                    | 34.53  | 34.78  |
| 2-Methyl-3-hexyne                                      | 32.95  | 33.01  |
| 2-Methyl-3-pentanol                                    | 31.21  | 31.3   |
| 2-Methyl-3-pentenoic acid                              | 31.15  | 31.28  |
| 2-Methyl-4,6-dicrotylphenol                            | 69.21  | 70.1   |
| 2-Methyl-4-crotylphenol                                | 51.25  | 51.6   |
| 2-Methyl-4-ethylpyrrolidine                            | 36.14  | 35.67  |
| 2-Methyl-4-heptanol                                    | 40.55  | 40.56  |

|                                    |       |       |
|------------------------------------|-------|-------|
| 2-Methyl-4-heptanone               | 39.11 | 39.41 |
| 2-Methyl-4-hexanone                | 34.62 | 34.78 |
| 2-Methyl-4-isopropylpyrrolidine    | 40.23 | 40.26 |
| 2-Methyl-4-oxo-1-heptanol          | 40.42 | 40.82 |
| 2-Methyl-5-ethylpyrrole            | 34.88 | 35.04 |
| 2-Methyl-5-phenylpyridine          | 55.07 | 53.94 |
| 2-Methyl-5-propylpyrrole           | 39.38 | 39.67 |
| 2-Methyl-5-propylthiophane         | 45.06 | 44.94 |
| 2-Methyl-5-propylthiophane sulfone | 45.49 | 45.78 |
| 2-Methyl-5-undecanol               | 59.05 | 59.08 |
| 2-Methyl-6-propyldioxane           | 40.4  | 40.44 |
| 2-Methylacrylonitrile              | 20.34 | 20.21 |
| 2-Methylaminoethanol               | 21.06 | 20.85 |
| 2-Methylanisole                    | 37.47 | 37.85 |
| 2-Methylbenzaldehyde               | 36.85 | 36.66 |
| 2-Methylbenzeneethanol             | 41.77 | 42.18 |
| 2-Methylbenzenemethanamine         | 39.15 | 39.57 |
| 2-Methylbenzimidazole              | 41.43 | 41.41 |
| 2-Methylbenzo[b]furane             | 39.92 | 39.87 |
| 2-Methylbenzoic acid               | 38.47 | 37.74 |
| 2-Methylbenzothiazole              | 43.93 | 44.23 |
| 2-Methylbenzoxazole                | 37.82 | 38.07 |
| 2-Methylbutanoyl chloride          | 30.58 | 30.71 |
| 2-Methylbutyl acrylate             | 40.61 | 40.58 |
| 2-Methylbutyric acid               | 26.81 | 26.85 |
| 2-Methylcyclohexanone              | 32.48 | 32.64 |
| 2-Methylcyclohexyl acrylate        | 47.91 | 47.71 |
| 2-Methylcyclopentanone             | 28.1  | 28.01 |
| 2-Methyldecane                     | 53.17 | 53.03 |
| 2-Methyldecanoic acid              | 54.51 | 54.63 |
| 2-Methyldiphenylmethane            | 60.22 | 60.7  |
| 2-Methyldodecane                   | 62.31 | 62.29 |
| 2-Methylenecyclohexanol            | 33.62 | 33.59 |
| 2-Methylfuran                      | 23.42 | 23.75 |
| 2-Methylheptadecane                | 85.55 | 85.44 |
| 2-Methylheptane                    | 39.23 | 39.14 |
| 2-Methylheptanoic acid             | 40.62 | 40.74 |
| 2-Methylheptyl acetate             | 49.97 | 50.15 |
| 2-Methylhexadecane                 | 81    | 80.81 |
| 2-Methylhexane                     | 34.58 | 34.51 |
| 2-Methylhexanoic acid              | 35.84 | 36.11 |
| 2-Methylindole                     | 43.76 | 42.52 |

|                                  |       |       |
|----------------------------------|-------|-------|
| 2-Methylnaphthalene              | 48.47 | 49.29 |
| 2-Methylnonadecane               | 94.81 | 94.7  |
| 2-Methylnonane                   | 48.41 | 48.4  |
| 2-Methylnonanoic acid            | 49.88 | 50    |
| 2-Methyloctadecane               | 90.24 | 90.07 |
| 2-Methyloctane                   | 44.12 | 43.77 |
| 2-Methyloctanoic acid            | 45.25 | 45.37 |
| 2-Methyloxazoline                | 22.05 | 22.8  |
| 2-Methyloxetane                  | 20.26 | 20.22 |
| 2-Methylpentadecane              | 76.31 | 76.18 |
| 2-Methylpentane                  | 30.94 | 29.88 |
| 2-Methylpentanedinitrile         | 29.65 | 29.46 |
| 2-Methylpentanoic acid           | 31.38 | 31.48 |
| 2-Methylpiperidine               | 31.34 | 31.08 |
| 2-Methylpropanal                 | 20.82 | 21.14 |
| 2-Methylpropanoic acid           | 22.55 | 22.22 |
| 2-Methylpropenoic acid           | 21.97 | 22.02 |
| 2-Methylpropylamine              | 24.42 | 24.05 |
| 2-Methylpyrazine                 | 27.07 | 26.9  |
| 2-Methylpyrrole                  | 25.41 | 25.8  |
| 2-Methylquinoline                | 46.93 | 46.77 |
| 2-Methylstyrene                  | 41.08 | 40.46 |
| 2-Methyltetradecane              | 71.73 | 71.55 |
| 2-Methyltetradecane-2-ol         | 73.11 | 72.95 |
| 2-Methyltetrahydrofuran          | 24.73 | 24.85 |
| 2-Methyltetrahydropyran          | 29.52 | 29.48 |
| 2-Methylthiophene                | 29.29 | 29.8  |
| 2-Methyltridecane                | 67    | 66.92 |
| 2-Methylundecanal                | 57.47 | 58.18 |
| 2-Methylundecane                 | 57.78 | 57.66 |
| 2-Naphthyl chlorofluorophosphate | 58.17 | 58.24 |
| 2-Naphthylamine                  | 49.16 | 48.55 |
| 2-n-Hexoxyethanol                | 42.47 | 42.28 |
| 2-Nitro-1-butanol                | 27.65 | 27.55 |
| 2-Nitro-1-propanol               | 23.29 | 22.92 |
| 2-Nitro-1-propene                | 21.55 | 20.9  |
| 2-Nitroacetophenone              | 42.33 | 42.9  |
| 2-Nitrobutane                    | 26.14 | 26.14 |
| 2-Nitroethanol                   | 19.04 | 18.55 |
| 2-Nitroethylbenzene              | 42.17 | 41.7  |
| 2-Nitrophenol                    | 35.38 | 34.96 |
| 2-Nitropropane                   | 21.6  | 21.51 |

|                                                   |       |        |
|---------------------------------------------------|-------|--------|
| 2-Nitrotoluene                                    | 37.34 | 38     |
| 2-Nonanol                                         | 44.46 | 45.23  |
| 2-Nonanone                                        | 43.95 | 44.08  |
| 2-Nonenal                                         | 44.81 | 44.13  |
| 2-Nonynoic acid                                   | 43.31 | 43.91  |
| 2-Octanamine                                      | 42.52 | 42.54  |
| 2-Octanol                                         | 40.25 | 40.6   |
| 2-Octanone                                        | 39.16 | 39.45  |
| 2-Octen-1-ol                                      | 40.3  | 40.39  |
| 2-Octylnaphthalene                                | 82.07 | 81.7   |
| 2-Octyn-1-ol                                      | 38.93 | 39.09  |
| 2-Octyne                                          | 37.31 | 37.68  |
| 2-Octynoic acid                                   | 38.68 | 39.28  |
| 2-Oxetanone                                       | 15.6  | 15.64  |
| 2-Oxiranylmethanol                                | 17.13 | 17     |
| 2-Pentanol                                        | 26.71 | 26.71  |
| 2-Pentanone ketazine                              | 54.63 | 54.56  |
| 2-Pentanone O-ethyloxime                          | 39.36 | 39.36  |
| 2-Pentanone O-propyloxime                         | 43.87 | 43.99  |
| 2-Pentanone oxime                                 | 29.6  | 29.6   |
| 2-Pentanoylthiophene                              | 49.07 | 48.59  |
| 2-Pentoxy-4-methyl-1,3,2-dioxaphospholane         | 49.55 | 50.27  |
| 2-Pentylnaphthalene                               | 68.09 | 67.81  |
| 2-Pentyloxytrimethylsilane                        | 49.75 | 49.57  |
| 2-Pentyltetrahydrofuran                           | 43.27 | 43.37  |
| 2-Pentylthiophene                                 | 48    | 48.32  |
| 2-Pentyn-1-ol                                     | 24.96 | 25.2   |
| 2-Pentyne                                         | 23.6  | 23.79  |
| 2-Phenoxy-1-propanol                              | 43.8  | 43.75  |
| 2-Phenoxyethanol                                  | 38.97 | 39.11  |
| 2-Phenoxypropanoyl chloride                       | 47.14 | 47.8   |
| 2-Phenoxyvinyl bis(dibutylamino) phosphorus oxide | 127   | 126.82 |
| 2-Phenoxyvinyl bis(diethylamino) phosphorus oxide | 90.71 | 89.78  |
| 2-Phenyl-1,3-butadiene                            | 44.76 | 44.67  |
| 2-Phenyl-1-propanol                               | 42.34 | 41.96  |
| 2-Phenyl-3-methyl-2-butene                        | 49.55 | 49.79  |
| 2-Phenylethylamine                                | 38.77 | 39.39  |
| 2-Phenyloctane                                    | 63.56 | 63.7   |
| 2-Phenylpropionitrile                             | 39.78 | 40.34  |
| 2-Phenyltetradecane                               | 91.47 | 91.48  |
| 2-Phenyltetrahydropyran                           | 49.13 | 49.41  |
| 2-Phenyltoluene                                   | 56.25 | 56.07  |



|                                                   |        |        |
|---------------------------------------------------|--------|--------|
| 2-Phenylvinyl bis(dipropylamino) phosphorus oxide | 107.56 | 106.97 |
| 2-Phenylvinyl diethoxy phosphorus thioxide        | 75.52  | 74.87  |
| 2-Phenylvinyl dimethoxy phosphorus thioxide       | 65.72  | 65.55  |
| 2-Picoline                                        | 28.79  | 29.2   |
| 2-Propanethiol                                    | 23.94  | 23.69  |
| 2-Propanol                                        | 17.73  | 17.45  |
| 2-Propene-1-thiol                                 | 22.9   | 23.39  |
| 2-Propionylthiophene                              | 39.74  | 39.33  |
| 2-Propoxy-4-methyl-1,3,2-dioxaphospholane         | 40.85  | 41.01  |
| 2-Propoxyethanol                                  | 28.52  | 28.39  |
| 2-Propoxymethylthiophene                          | 45     | 45.38  |
| 2-Propoxyvinyl bis(dibutylamino) phosphorus oxide | 115.77 | 116.12 |
| 2-Propyl-1,4-diox-2-ene                           | 35.06  | 34.92  |
| 2-Propyl-1,4-dioxane                              | 35.75  | 35.8   |
| 2-Propyl-2,3-dihydrofuran                         | 33.26  | 33.52  |
| 2-Propyl-2-hydroxy-1,4-dioxane                    | 37.62  | 36.93  |
| 2-Propyl-3-ethyl-1,4-diox-2-ene                   | 44.28  | 44.29  |
| 2-Propyl-4-ethyl-2,3-dihydrofuran                 | 42.42  | 42.85  |
| 2-Propyl-4-ethylpyrrole                           | 43.99  | 44.39  |
| 2-Propyl-4-ethylpyrrolidine                       | 44.78  | 44.93  |
| 2-Propyl-4-isopropylpyrrolidine                   | 49.2   | 49.52  |
| 2-Propyl-4-methyl-2,3-dihydrofuran                | 37.93  | 38.22  |
| 2-Propyl-4-methylpyrrole                          | 39.61  | 39.76  |
| 2-Propyl-4-methylpyrrolidine                      | 40.29  | 40.3   |
| 2-Propyl-5-butylpyrrole                           | 53.51  | 53.56  |
| 2-Propyl-5-butylpyrrolidine                       | 53.77  | 54.16  |
| 2-Propyl-5-hexylpyrrole                           | 62.79  | 62.82  |
| 2-Propyl-5-hexylpyrrolidine                       | 63.18  | 63.42  |
| 2-Propyl-6-methyl-1,4-diox-2-ene                  | 39.74  | 39.56  |
| 2-Propyl-6-methyl-2-hydroxy-1,4-dioxane           | 42.32  | 41.57  |
| 2-Propylcyclohexanone                             | 40.95  | 41.9   |
| 2-Propylheptanoic acid                            | 49.88  | 50     |
| 2-Propylnaphthalene                               | 58.67  | 58.55  |
| 2-Propyloctanoic acid                             | 54.51  | 54.63  |
| 2-Propylpentanoic acid                            | 40.79  | 40.74  |
| 2-Propylpiperidine                                | 40.61  | 40.34  |
| 2-Propylpyridine                                  | 38.59  | 38.46  |
| 2-Propylpyrrole                                   | 36.1   | 35.06  |
| 2-Propyltetrahydropyran                           | 38.69  | 38.74  |
| 2-Propylthiophene                                 | 38.65  | 39.06  |
| 2-Propyltoluene                                   | 45.36  | 45.4   |
| 2-Propyn-1-butyrate                               | 34.03  | 34.26  |

|                               |       |       |
|-------------------------------|-------|-------|
| 2-Propyn-1-formate            | 20.22 | 20.5  |
| 2-Propyn-1-heptanoate         | 47.97 | 48.15 |
| 2-Propyn-1-hexanoate          | 43.34 | 43.52 |
| 2-Propyn-1-ol                 | 15.35 | 15.4  |
| 2-Propyn-1-valerate           | 38.7  | 38.89 |
| 2-Pyridinecarbonitrile        | 29.48 | 28.99 |
| 2-Pyridinecarboxaldehyde      | 30.01 | 29.72 |
| 2-Pyridinemethanamine         | 32.39 | 32.63 |
| 2-Pyridinemethanol            | 30.46 | 30.61 |
| 2-Pyridinepropanol            | 39.96 | 39.87 |
| 2-Pyrone                      | 24.62 | 24.09 |
| 2-Pyrrolidone                 | 21.61 | 21.91 |
| 2-s-Butylphenol               | 46.58 | 46.95 |
| 2-Silylpentasilane            | 73.17 | 73.09 |
| 2-Silyltetrasilane            | 61.12 | 61.05 |
| 2-Silyltrisilane              | 48.88 | 49.01 |
| 2-t-Amylnaphthalene           | 67.9  | 67.79 |
| 2-t-Butyl-4-methylphenol      | 51.97 | 51.78 |
| 2-t-Butyl-6-methylphenol      | 51.55 | 51.78 |
| 2-t-Butylaniline              | 49.01 | 49.27 |
| 2-t-Butylfuran                | 37.46 | 37.62 |
| 2-t-Butylnaphthalene          | 62.9  | 63.16 |
| 2-t-Butylphenol               | 46.38 | 46.97 |
| 2-t-Butyltetrahydropyran      | 43.25 | 43.35 |
| 2-t-Butylthiophene            | 42.81 | 43.67 |
| 2-t-Butyltoluene              | 49.64 | 50.01 |
| 2-Tetralone                   | 42.75 | 43.53 |
| 2-Thiocresol                  | 39.14 | 39.32 |
| 2-Thiopheneacetonitrile       | 33.59 | 34.22 |
| 2-Thiophenecarbaldehyde       | 30.9  | 30.32 |
| 2-Thiophenecarbonitrile       | 30.24 | 29.59 |
| 2-Thiophenemethanol           | 31.2  | 31.21 |
| 2-Tolunitrile                 | 36.23 | 35.93 |
| 2-Tolyl 3-tolyl propoxyborine | 82.11 | 81.86 |
| 2-Tolyl 4-tolyl propoxyborine | 82.26 | 81.86 |
| 2-Tolyl dibutoxyborine        | 76.18 | 76.43 |
| 2-Tolyl diethoxyborine        | 57.69 | 57.91 |
| 2-Tolyl dimethoxyborine       | 48.14 | 48.59 |
| 2-Tolyl dipropoxyborine       | 66.97 | 67.17 |
| 2-Tridecanone                 | 62.59 | 62.6  |
| 2-Trifluoromethylaniline      | 35.77 | 35.68 |
| 2-Undecanol                   | 54.63 | 54.49 |

|                                             |       |       |
|---------------------------------------------|-------|-------|
| 2-Undecanone                                | 53.23 | 53.34 |
| 2-Undecylthiacyclohexane                    | 81.92 | 81.99 |
| 2-Undecyne                                  | 51.18 | 51.57 |
| 2-Vinyl-1,4-dioxane                         | 30.44 | 30.86 |
| 2-Vinylfuran                                | 29.27 | 28.07 |
| 2-Vinyloxymethylthiophene                   | 40.75 | 40.05 |
| 2-Vinylpyridine                             | 33.53 | 33.52 |
| 2-Vinyltetrahydrofuran                      | 28.96 | 29.17 |
| 3-(1-Methyl-2-pyrrolidinyl)pyridine         | 49.49 | 49.2  |
| 3-(2-Furyl)-4-oxa-6-hexanol                 | 45.21 | 45.38 |
| 3-(2-Furyl)-4-oxa-6-hexyl acetate           | 57.67 | 58.14 |
| 3-(4-Methyl-3-pentenyl)furan                | 46.52 | 46.73 |
| 3-(Aminomethyl)-3,5,5-trimethylcyclohexanol | 51.14 | 51.11 |
| 3-(Butylamino)propionitrile                 | 37.92 | 37.71 |
| 3-(Chloromethyl)heptane                     | 43.97 | 43.94 |
| 3-(Chloromethyl)pentane                     | 34.4  | 34.68 |
| 3-(Dibutylamino)propionitrile               | 56.6  | 56.68 |
| 3-(Diethylamino)-1-propanol                 | 40.52 | 39.78 |
| 3-(Diethylamino)propionitrile               | 38.06 | 38.16 |
| 3-(Dimethylamino)butyronitrile              | 32.47 | 33.61 |
| 3-(Dipentylamino)propionitrile              | 65.86 | 65.94 |
| 3-(Dipropylamino)propionitrile              | 47.29 | 47.42 |
| 3-(Ethylamino)propionitrile                 | 28.71 | 28.45 |
| 3-(Hexylamino)propionitrile                 | 47.3  | 46.97 |
| 3-(Methylamino)propionitrile                | 24.26 | 23.86 |
| 3-(Methylthio)-1-propene                    | 28.13 | 28.06 |
| 3-(Pentylamino)propionitrile                | 42.59 | 42.34 |
| 3-(Propylamino)propionitrile                | 33.4  | 33.08 |
| 3-(Triethoxysilyl)-1-propanamine            | 59.24 | 59.23 |
| 3-(Trifluoromethyl)phenyl isocyanate        | 38.73 | 38.63 |
| 3-(Trimethylsilyl)-1-propanol               | 41.55 | 40.94 |
| 3,3,3-Trichloro-1-propene                   | 30.36 | 30.44 |
| 3,3,4,4-Tetrafluorodihydro-2,5-furandione   | 21.3  | 21.07 |
| 3,3,4,4-Tetramethyl-1,2-dioxetane           | 31.1  | 31.8  |
| 3,3,4,4-Tetramethylhexane                   | 47.84 | 48.4  |
| 3,3,4-Trimethylhexane                       | 43.58 | 43.75 |
| 3,3,5-Trimethylcyclohexanone                | 41.88 | 41.88 |
| 3,3,5-Trimethylcyclohexyl acrylate          | 57.23 | 56.95 |
| 3,3,5-Trimethylheptane                      | 47.99 | 48.38 |
| 3,3'-Bitolyl                                | 61.93 | 60.88 |
| 3,3-Diacetoxy-1-propene                     | 37.14 | 37.58 |
| 3,3-Diethoxy-1-propene                      | 36.94 | 37.46 |

|                                          |       |       |
|------------------------------------------|-------|-------|
| 3,3-Diethoxy-1-propyne                   | 35.82 | 35.73 |
| 3,3'-Difluorobiphenyl                    | 52.18 | 51.06 |
| 3,3-Dimethoxy-1-propene                  | 28.43 | 28.14 |
| 3,3-Dimethyl-1-butanol                   | 31.42 | 31.31 |
| 3,3-Dimethyl-1-butene                    | 29.6  | 29.59 |
| 3,3-Dimethyl-1-pentene                   | 34.01 | 34.22 |
| 3,3-Dimethyl-2-butanol                   | 31.49 | 31.32 |
| 3,3-Dimethyl-2-butylamine                | 32.73 | 33.26 |
| 3,3-Dimethylbutanoic acid                | 31.52 | 31.5  |
| 3,3-Dimethylbutanoyl chloride            | 35.23 | 35.36 |
| 3,3-Dimethylcyclohexanol                 | 38.51 | 38.44 |
| 3,3-Dimethylcyclohexanone                | 37.18 | 37.29 |
| 3,3-Dimethylheptane                      | 43.68 | 43.79 |
| 3,3-Dimethylhexane                       | 39.01 | 39.16 |
| 3,3-Dimethylhexanoic acid                | 40.61 | 40.76 |
| 3,3-Dimethyloxetane                      | 24.84 | 24.82 |
| 3,3-Dimethylpentane                      | 34.32 | 34.53 |
| 3,3-Dimethylpentanoic acid               | 36.01 | 36.13 |
| 3,4,5-Trimethylheptane                   | 48.18 | 48.32 |
| 3,4-Dibromoheptane                       | 50.07 | 50.13 |
| 3,4-Dibromohexane                        | 45.1  | 45.5  |
| 3,4-Dichloro-1,4-dioxane                 | 31.36 | 31.74 |
| 3,4-Dichloro-1-butene                    | 30.88 | 29.91 |
| 3,4-Dichlorotoluene                      | 40.65 | 40.97 |
| 3,4-Diethylhexane                        | 48.09 | 48.36 |
| 3,4-Dihydro-1H-2-benzopyran              | 39.72 | 40.32 |
| 3,4-Dihydro-2H-1-benzopyran              | 39.54 | 40.37 |
| 3,4-Dihydro-2H-1-benzopyran-2-one        | 40.76 | 40.41 |
| 3,4-Dihydro-2-methoxy-2H-pyran           | 30.02 | 30.38 |
| 3,4-Dihydro-2-methyl-1(2H)-naphthalenone | 48.54 | 48.12 |
| 3,4-Dihydro-4H-pyran                     | 24.08 | 24.25 |
| 3,4-Dihydroxytoluene                     | 34.64 | 34.87 |
| 3,4-Dimethoxybenzenemethanol             | 45.83 | 45.78 |
| 3,4-Dimethoxytoluene                     | 44.43 | 44.37 |
| 3,4-Dimethyl-1-pentene                   | 34.27 | 34.16 |
| 3,4-Dimethylacetophenone                 | 46.18 | 45.85 |
| 3,4-Dimethylheptane                      | 43.52 | 43.73 |
| 3,4-Dimethylhexane                       | 39.08 | 39.1  |
| 3,4-Dimethyloctane                       | 48.41 | 48.36 |
| 3,4-Dimethylthiophene                    | 34.38 | 34.21 |
| 3,4-Hexanedione                          | 30.25 | 30.46 |
| 3,4-Lutidine                             | 34.51 | 33.84 |

|                                       |       |       |
|---------------------------------------|-------|-------|
| 3,5,5-Trimethyl-1,1-hexanedithiol     | 59.23 | 59.03 |
| 3,5,5-Trimethyl-1-hexanol             | 45.25 | 45.16 |
| 3,5,5-Trimethyl-2-cyclohexenone       | 42.17 | 41.79 |
| 3,5-Bis(trifluoromethyl)aniline       | 40.09 | 40.77 |
| 3,5-Diethyltoluene                    | 50.07 | 50.21 |
| 3,5-Dimethoxytoluene                  | 44.4  | 44.37 |
| 3,5-Dimethyl-1-hexen-3-ol             | 39.85 | 40.19 |
| 3,5-Dimethyl-2-cyclohexen-1-one       | 37.61 | 37.14 |
| 3,5-Dimethyl-4-heptanol               | 44.42 | 45.15 |
| 3,5-Dimethylanisole                   | 42.38 | 42.66 |
| 3,5-Dimethylheptan-4-one              | 43.9  | 44    |
| 3,5-Dimethylheptane                   | 43.82 | 43.73 |
| 3,5-Dimethylisoxazole                 | 25.96 | 25.97 |
| 3,5-Lupetidine                        | 35.35 | 35.7  |
| 3,5-Lutidine                          | 33.81 | 33.84 |
| 3,5-Xylidine                          | 39.89 | 40.21 |
| 3,6-Dibromononane                     | 59.32 | 59.39 |
| 3,6-Dihydro-4-methyl-2H-pyran         | 28.89 | 29.34 |
| 3,6-Dimethyl-3-heptene                | 43.47 | 43.64 |
| 3,6-Dimethyl-3-octanol                | 49.68 | 49.76 |
| 3,6-Dimethyloctane                    | 48.54 | 48.36 |
| 3,7,11-Trimethyl-2,6,10-dodecatrienal | 72.52 | 71.72 |
| 3,7-Dimethyl-1,3,7-octatriene         | 48.91 | 47.87 |
| 3,7-Dimethyl-1,7-octanediol           | 50.93 | 51.17 |
| 3,7-Dimethyl-1-octanol                | 49.94 | 49.77 |
| 3,7-Dimethyl-1-octene                 | 48.12 | 48.05 |
| 3,7-Dimethyl-3-octanol                | 49.8  | 49.76 |
| 3-Acetyldihydro-2(3H)-furanone        | 29.54 | 29.76 |
| 3-Allylpiperidine                     | 39.38 | 40.06 |
| 3-Amino-1,2-propanediol,              | 22.45 | 22.29 |
| 3-Aminobutyronitrile                  | 23.13 | 23.88 |
| 3-Aminopentane                        | 28.62 | 28.65 |
| 3-Aminopropionitrile                  | 19.26 | 19.25 |
| 3-Anisaldehyde                        | 38.95 | 38.37 |
| 3-Bromo-1,1,2-trichloro-1-propene     | 38.26 | 38.19 |
| 3-Bromo-1,1-dichloro-1-propene        | 33.92 | 33.27 |
| 3-Bromo-1-propanol                    | 25.84 | 25.18 |
| 3-Bromo-2-methylnonane                | 55.74 | 56.19 |
| 3-Bromo-3-methylpentane               | 37.66 | 37.82 |
| 3-Bromo-4,5-dihydro-2(3H)-furanone    | 27.23 | 28.06 |
| 3-Bromoaniline                        | 38.56 | 38.18 |
| 3-Bromoanisole                        | 41.21 | 40.63 |

|                                        |       |       |
|----------------------------------------|-------|-------|
| 3-Bromochlorobenzene                   | 38.93 | 38.93 |
| 3-Bromocyclohexene                     | 35.93 | 35.37 |
| 3-Bromofuran                           | 26.01 | 26.42 |
| 3-Bromohexane                          | 37.4  | 37.71 |
| 3-Bromonitrobenzene                    | 40.45 | 40.78 |
| 3-Bromononane                          | 51.95 | 51.6  |
| 3-Bromopentane                         | 33.06 | 33.08 |
| 3-Bromopropanenitrile                  | 23.56 | 23.56 |
| 3-Bromopropyne                         | 21.87 | 21.73 |
| 3-Bromopyridine                        | 31.49 | 31.81 |
| 3-Bromothiophene                       | 31.8  | 32.22 |
| 3-Bromotoluene                         | 38.71 | 38.92 |
| 3-Buten-1-ol                           | 21.77 | 21.76 |
| 3-Buten-2-one                          | 20.02 | 20.62 |
| 3-Butenoic acid                        | 21.77 | 21.95 |
| 3-Butoxypropanenitrile                 | 36.07 | 36.03 |
| 3-Butyn-1-ol                           | 19.99 | 20.03 |
| 3-Butyn-2-ol                           | 20.61 | 20.04 |
| 3-Butyn-2-one                          | 19.06 | 18.89 |
| 3-Butynylbenzene                       | 42.81 | 43.18 |
| 3-Carene                               | 44.38 | 43.93 |
| 3-Chloro-(1,1'-biphenyl)-2-ol          | 58.25 | 57.85 |
| 3-Chloro-1,1,1-trifluoropropane        | 20.68 | 21.11 |
| 3-Chloro-1,1-diethoxypropane           | 42.98 | 42.57 |
| 3-Chloro-1-butanol                     | 26.19 | 26.83 |
| 3-Chloro-1-butene                      | 25.25 | 25.11 |
| 3-Chloro-1-propanol                    | 22.29 | 22.24 |
| 3-Chloro-2-(chloromethyl)-1-propene    | 29.89 | 30.02 |
| 3-Chloro-2,5-furandione                | 25.26 | 25.03 |
| 3-Chloro-2-butanone                    | 25.65 | 25.69 |
| 3-Chloro-2-methylpropene               | 25.48 | 25.22 |
| 3-Chloro-3,4-epoxy-1-methylcyclohexane | 37.2  | 37.15 |
| 3-Chloroacetophenone                   | 40.56 | 41.05 |
| 3-Chloroaniline                        | 35.43 | 35.41 |
| 3-Chloroanisole                        | 37.84 | 37.86 |
| 3-Chlorobenzaldehyde                   | 36.9  | 36.67 |
| 3-Chlorobenzeneacetonitrile            | 40.52 | 40.57 |
| 3-Chlorobenzotrichloride               | 50.6  | 50.87 |
| 3-Chlorobenzyl chloride                | 40.74 | 40.95 |
| 3-Chlorobiphenyl                       | 57.09 | 56.08 |
| 3-Chlorobutanoic acid                  | 26.18 | 27.02 |
| 3-Chlorocrotonic acid                  | 28.06 | 26.86 |

|                                    |       |       |
|------------------------------------|-------|-------|
| 3-Chlorocyclopentene               | 27.59 | 27.71 |
| 3-Chloroheptane                    | 39.44 | 39.31 |
| 3-Chlorohexane                     | 34.88 | 34.68 |
| 3-Chloropentane                    | 30.13 | 30.05 |
| 3-Chloropentanoic acid             | 31.71 | 31.65 |
| 3-Chlorophenol                     | 33.22 | 33.11 |
| 3-Chloropropane-1,2-diyl dinitrate | 35.79 | 36.08 |
| 3-Chloropropanoyl chloride         | 25.88 | 26.29 |
| 3-Chloropropionitrile              | 20.23 | 20.62 |
| 3-Chloropropyl chloroformate       | 32.36 | 32.23 |
| 3-Chloropropyne                    | 18.87 | 18.79 |
| 3-Chlorostyrene                    | 40.77 | 40.47 |
| 3-Chlorotoluene                    | 35.88 | 36.15 |
| 3-Cyclohexene-1-carboxaldehyde     | 31.97 | 32.69 |
| 3-Cyclohexene-1-carboxylic acid    | 33.2  | 33.77 |
| 3-Cyclohexyl-1-propyne             | 44.1  | 44.22 |
| 3-Cyclohexylhexane                 | 54.7  | 55.48 |
| 3-Decanol                          | 49.84 | 49.86 |
| 3-Decanone                         | 48.45 | 48.71 |
| 3-Decen-2-one                      | 48.74 | 48.51 |
| 3-Dimethylamino-1-propanol         | 30.93 | 30.6  |
| 3-Ethoxybenzaldehyde               | 43.81 | 43.03 |
| 3-Ethoxypropanenitrile             | 26.27 | 26.77 |
| 3-Ethoxytoluene                    | 43.14 | 42.51 |
| 3-Ethyl-1-pentene                  | 34.28 | 34.2  |
| 3-Ethyl-2,4-dimethyl-1H-pyrrole    | 39.43 | 39.83 |
| 3-Ethyl-2,4-pentanedione           | 35.5  | 35.05 |
| 3-Ethyl-2,5-dimethylpyrazine       | 41.58 | 41.49 |
| 3-Ethyl-2-methyl-1-pentene         | 38.61 | 38.9  |
| 3-Ethyl-2-methylhexane             | 43.53 | 43.73 |
| 3-Ethyl-2-methylpentane            | 38.84 | 39.1  |
| 3-Ethyl-2-pentene                  | 34.12 | 34.42 |
| 3-Ethyl-3-methylhexane             | 43.48 | 43.79 |
| 3-Ethyl-3-methylpentane            | 38.73 | 39.16 |
| 3-Ethyl-4-methylhexane             | 43.14 | 43.73 |
| 3-Ethyl-6-nonanone                 | 52.71 | 53.3  |
| 3-Ethyldecane                      | 57.65 | 57.66 |
| 3-Ethylheptane                     | 43.92 | 43.77 |
| 3-Ethylhexane                      | 38.96 | 39.14 |
| 3-Ethyl-octane                     | 48.48 | 48.4  |
| 3-Ethyl-o-xylene                   | 45.33 | 45.58 |
| 3-Ethylpentane                     | 34.28 | 34.51 |

|                                   |       |       |
|-----------------------------------|-------|-------|
| 3-Ethylpyridine                   | 33.16 | 33.66 |
| 3-Ethylstyrene                    | 45.98 | 45.09 |
| 3-Ethyltoluene                    | 40.66 | 40.77 |
| 3-Fluoroaniline                   | 30.32 | 30.49 |
| 3-Fluoroanisole                   | 32.89 | 32.94 |
| 3-Fluorobenzaldehyde              | 32.28 | 31.75 |
| 3-Fluorobenzoyl chloride          | 37.47 | 36.69 |
| 3-Fluoronitrobenzene              | 32.69 | 33.09 |
| 3-Fluorophenetole                 | 37.47 | 37.6  |
| 3-Fluorophenol                    | 27.26 | 28.19 |
| 3-Fluoropyridine                  | 24.06 | 24.12 |
| 3-Fluorotoluene                   | 30.76 | 31.23 |
| 3-Furancarboxaldehyde             | 25.22 | 24.23 |
| 3-Heptanol                        | 35.75 | 35.97 |
| 3-Heptanone                       | 34.25 | 34.82 |
| 3-Heptyne                         | 33.1  | 33.05 |
| 3-Heptynoic acid                  | 34.2  | 34.65 |
| 3-Hexanol                         | 31.38 | 31.34 |
| 3-Hexanone                        | 29.94 | 30.19 |
| 3-Hexanone ketazine               | 63.89 | 63.82 |
| 3-Hexanone O-ethyloxime           | 44    | 43.99 |
| 3-Hexanone O-propyloxime          | 48.59 | 48.62 |
| 3-Hexanone oxime                  | 34.19 | 34.23 |
| 3-Hexyloxypropanenitrile          | 45.41 | 45.29 |
| 3-Hexyn-1-ol                      | 29.53 | 29.83 |
| 3-Hexyne                          | 28.24 | 28.42 |
| 3-Hexyne-2,5-diol                 | 31.23 | 31.26 |
| 3-Hydroxyacetophenone             | 38.55 | 38    |
| 3-Hydroxydiphenylether            | 55.04 | 54.8  |
| 3-Hydroxypropylphosphine          | 27.09 | 27.43 |
| 3-Iodo-1-propanol                 | 30.04 | 30.32 |
| 3-Iodopentane                     | 38.37 | 38.5  |
| 3-Iodotoluene                     | 44.06 | 43.9  |
| 3-Isopropyl-2-methyldecane        | 66.68 | 66.84 |
| 3-Isopropyl-2-methyldodecane      | 75.98 | 76.1  |
| 3-Isopropyl-2-methylheptane       | 52.75 | 52.95 |
| 3-Isopropyl-2-methylnonane        | 62.05 | 62.21 |
| 3-Isopropyl-2-methyloctane        | 57.42 | 57.58 |
| 3-Isopropyl-2-methylundecane      | 71.3  | 71.47 |
| 3-Isopropyltoluene                | 45.31 | 45.36 |
| 3-Mercaptopropyl-trimethoxysilane | 49.46 | 49.49 |
| 3-Methoxy-1,2-propanediol         | 25.21 | 25.15 |



|                                                                  |       |       |
|------------------------------------------------------------------|-------|-------|
| 3-Methoxy-1-butanol                                              | 28.24 | 28.37 |
| 3-Methoxyacetophenone                                            | 43.2  | 42.75 |
| 3-Methoxybenzenemethanol                                         | 39.22 | 39.26 |
| 3-Methoxybenzonitrile                                            | 38.37 | 37.64 |
| 3-Methoxyphenol                                                  | 35.02 | 34.81 |
| 3-Methoxyphenylacetone                                           | 46.39 | 47.38 |
| 3-Methoxypropionitrile                                           | 22.21 | 22.11 |
| 3-Methoxypyridine                                                | 30.53 | 30.74 |
| 3-Methoxytoluene                                                 | 37.89 | 37.85 |
| 3-Methyl-1,2-butadiene                                           | 25.34 | 25.32 |
| 3-Methyl-1,3-pentadiene                                          | 30.36 | 29.48 |
| 3-Methyl-1,5-dibromopentane                                      | 45.11 | 45.36 |
| 3-methyl-1,5-pentanediol                                         | 32.83 | 32.7  |
| 3-Methyl-1-butanethiol                                           | 32.97 | 32.92 |
| 3-Methyl-1-butene                                                | 25.18 | 24.94 |
| 3-Methyl-1-butyne                                                | 23.26 | 23.21 |
| 3-Methyl-1-heptanol                                              | 40.79 | 40.55 |
| 3-Methyl-1-hexene                                                | 34.38 | 34.2  |
| 3-Methyl-1-hexylamine                                            | 38.15 | 37.94 |
| 3-Methyl-1H-indene                                               | 43.44 | 43.13 |
| 3-Methyl-1H-pyrazole                                             | 23.33 | 22.99 |
| 3-Methyl-1-octyn-3-ol                                            | 43.5  | 43.13 |
| 3-Methyl-1-pentanol                                              | 30.79 | 31.29 |
| 3-Methyl-1-pentene                                               | 29.49 | 29.57 |
| 3-Methyl-1-pentyn-3-ol                                           | 29.24 | 29.24 |
| 3-Methyl-1-phenyl-1-butanone                                     | 50.34 | 50.08 |
| 3-Methyl-1-propylpyridinium<br>bis(trifluoromethylsulfonyl)amide | 76.4  | 76.43 |
| 3-Methyl-2,5-furandione                                          | 25.13 | 24.81 |
| 3-Methyl-2-butanol                                               | 26.64 | 26.67 |
| 3-Methyl-2-butanone                                              | 25.25 | 25.52 |
| 3-Methyl-2-buten-1-ol                                            | 26.83 | 26.57 |
| 3-Methyl-2-butenal                                               | 26.06 | 25.68 |
| 3-Methyl-2-butenoyl chloride                                     | 31.46 | 30.62 |
| 3-Methyl-2-cyclohexen-1-one                                      | 33.13 | 32.55 |
| 3-Methyl-2-cyclopenten-1-one                                     | 27.69 | 27.92 |
| 3-Methyl-2-heptanol                                              | 40.3  | 40.56 |
| 3-Methyl-2-hexanol                                               | 35.76 | 35.93 |
| 3-Methyl-2-oxazolidinone                                         | 23.42 | 23.94 |
| 3-Methyl-2-oxobutanoic acid                                      | 27.3  | 27.12 |
| 3-Methyl-2-pentanol                                              | 31.01 | 31.3  |
| 3-Methyl-2-pentanone                                             | 29.88 | 30.15 |

|                                        |       |        |
|----------------------------------------|-------|--------|
| 3-Methyl-2-pentyl-2-cyclopenten-1-one  | 51.23 | 51.14  |
| 3-Methyl-3-buten-2-ol                  | 26.02 | 26.47  |
| 3-Methyl-3-heptanol                    | 40.45 | 40.54  |
| 3-Methyl-3-hexanol                     | 35.95 | 35.91  |
| 3-Methyl-3-octanol                     | 45.56 | 45.17  |
| 3-Methyl-3-pentanol                    | 31.11 | 31.28  |
| 3-Methyl-3-penten-1-yne                | 28.19 | 27.75  |
| 3-Methyl-4-heptanol                    | 39.66 | 40.56  |
| 3-Methyl-5-hepten-2-one                | 38.87 | 39.21  |
| 3-Methyl-6-isopropyl-2-cyclohexen-1-ol | 47.44 | 47.51  |
| 3-Methyl-6-nonanone                    | 48.82 | 48.67  |
| 3-Methylbenzaldehyde                   | 37.07 | 36.66  |
| 3-Methylbenzenemethanamine             | 39.12 | 39.57  |
| 3-Methylbenzoic acid                   | 38.57 | 37.74  |
| 3-Methylbutanaloxime                   | 29.64 | 29.76  |
| 3-Methylbutanoic acid                  | 26.79 | 26.85  |
| 3-Methylbutanoyl chloride              | 30.67 | 30.71  |
| 3-Methylbutyl 3-chloropropionate       | 45.77 | 45.69  |
| 3-Methylbutyl nitrate                  | 33.28 | 32.87  |
| 3-Methylbutyl trichloroacetate         | 51.17 | 50.98  |
| 3-Methyl-cis-2-pentene                 | 29.73 | 29.79  |
| 3-Methylcyclohexanone                  | 32.72 | 32.64  |
| 3-Methylcyclohexene                    | 31.81 | 32.17  |
| 3-Methylcyclohexyl acrylate            | 47.84 | 47.71  |
| 3-Methylcyclopentanol                  | 29.37 | 29.16  |
| 3-Methylcyclopentanone                 | 27.93 | 28.01  |
| 3-Methylcyclopentene                   | 27.55 | 27.54  |
| 3-Methyldecane                         | 53.04 | 53.03  |
| 3-Methyldihydro-2,5-furandione         | 25.48 | 24.9   |
| 3-Methyldodecane                       | 62.26 | 62.29  |
| 3-Methyleicosane                       | 99.38 | 99.33  |
| 3-Methyleneheptane                     | 38.71 | 38.94  |
| 3-Methylfuran                          | 23.12 | 23.71  |
| 3-Methylheneicosane                    | 104.1 | 103.96 |
| 3-Methylheptadecane                    | 85.54 | 85.44  |
| 3-Methylheptane                        | 39.12 | 39.14  |
| 3-Methylhexadecane                     | 80.85 | 80.81  |
| 3-Methylhexanal                        | 34.65 | 35.03  |
| 3-Methylhexane                         | 34.21 | 34.51  |
| 3-Methylhexanoic acid                  | 35.99 | 36.11  |
| 3-Methylmethylenecyclohexane           | 37.19 | 36.76  |
| 3-Methylnonadecane                     | 94.81 | 94.7   |

|                           |       |       |
|---------------------------|-------|-------|
| 3-Methylnonane            | 48.19 | 48.4  |
| 3-Methyloctadecane        | 90.18 | 90.07 |
| 3-Methyloctane            | 43.75 | 43.77 |
| 3-Methylpentadecane       | 76.25 | 76.18 |
| 3-Methylpentadecane-3-ol  | 77.62 | 77.58 |
| 3-Methylpentane           | 29.8  | 29.88 |
| 3-Methylpiperidine        | 31.37 | 31.11 |
| 3-Methylpyridazine        | 27.14 | 27.12 |
| 3-Methylpyridine          | 28.83 | 29.03 |
| 3-Methylquinoline         | 46.95 | 46.6  |
| 3-Methylstyrene           | 40.92 | 40.46 |
| 3-Methylsulfolane         | 31.93 | 31.87 |
| 3-Methyltetradecane       | 71.64 | 71.55 |
| 3-Methylthiophene         | 29.22 | 29.51 |
| 3-Methyl-trans-2-pentene  | 29.73 | 29.79 |
| 3-Methyltridecane         | 66.77 | 66.92 |
| 3-Methylundecane          | 57.69 | 57.66 |
| 3-Methylvaleric acid      | 31.47 | 31.48 |
| 3-Nitro-2-butanol         | 27.96 | 27.56 |
| 3-Nitrobenzotrifluoride   | 37.27 | 38.28 |
| 3-Nitrobenzylalcohol      | 39.12 | 39.41 |
| 3-Nitrotoluene            | 37.53 | 38    |
| 3-Nonanol                 | 45.07 | 45.23 |
| 3-Nonanone                | 43.75 | 44.08 |
| 3-Nonenoic acid           | 44.97 | 45.21 |
| 3-Octanol                 | 40.37 | 40.6  |
| 3-Octanone                | 39.06 | 39.45 |
| 3-Octyne                  | 37.43 | 37.68 |
| 3-Oxa-5-oxo-1-octanol     | 37.8  | 37.92 |
| 3-Pentanethiol            | 32.96 | 32.95 |
| 3-Pentanol                | 26.65 | 26.71 |
| 3-Pentanone ketazine      | 54.46 | 54.56 |
| 3-Pentanone O-ethyloxime  | 39.22 | 39.36 |
| 3-Pentanone O-propyloxime | 43.8  | 43.99 |
| 3-Pentanone oxime         | 29.6  | 29.6  |
| 3-Penten-2-ol             | 26.61 | 26.51 |
| 3-Pentyloxypropanenitrile | 40.73 | 40.66 |
| 3-Pentyn-1-ol             | 24.89 | 25.2  |
| 3-Phenoxybenzaldehyde     | 58.75 | 58.36 |
| 3-Phenyl-2-propyn-1-ol    | 41.22 | 40.5  |
| 3-Phenylpropene           | 39.83 | 40.28 |
| 3-Phenylpropylthiol       | 47.98 | 48.26 |

|                                            |       |       |
|--------------------------------------------|-------|-------|
| 3-Phenyltoluene                            | 56.31 | 56.07 |
| 3-Piperidinemethanol                       | 32.81 | 32.52 |
| 3-Propoxy-1-propene                        | 30.71 | 31.3  |
| 3-Propoxypropanenitrile                    | 31.47 | 31.4  |
| 3-Propyltoluene                            | 45.56 | 45.4  |
| 3-Pyridinemethanamine                      | 32.48 | 32.46 |
| 3-Pyridinemethanol                         | 30.53 | 30.44 |
| 3-Pyridinepropanol                         | 39.95 | 39.7  |
| 3-t-Butylfuran                             | 37.08 | 37.58 |
| 3-t-Butylthiophene                         | 43.19 | 43.38 |
| 3-t-Butyltoluene                           | 49.89 | 50.01 |
| 3-Thiocresol                               | 39.14 | 39.32 |
| 3-Thiopropionic acid                       | 25.37 | 25.3  |
| 3-Tolunitrile                              | 34.81 | 35.93 |
| 3-Tolyl dibutoxyborine                     | 76.48 | 76.43 |
| 3-Tolyl diethoxyborine                     | 58.08 | 57.91 |
| 3-Tolyl dimethoxyborine                    | 48.38 | 48.59 |
| 3-Tolyl dipropoxyborine                    | 67.26 | 67.17 |
| 3-Tolylphosphorous diaziridide             | 63.67 | 63.71 |
| 3-Trifluoromethylaniline                   | 34.98 | 35.68 |
| 3-Trifluoromethylbenzonitrile              | 35.95 | 36.21 |
| 3-Trifluoromethylbenzoyl chloride          | 42.61 | 41.88 |
| 3-Vinyl-7-oxabicyclo[4.1.0]heptane         | 36.16 | 36.26 |
| 3-Vinylpyridine                            | 34.06 | 33.35 |
| 4-(1,1-Dimethylpropyl)cyclohexanone        | 50.82 | 51.14 |
| 4(10)-Thujene-3-ol                         | 46.16 | 45.24 |
| 4-(1-Butylpentyl)pyridine                  | 66.24 | 66.03 |
| 4-(1-Ethylpropyl)pyridine                  | 47.53 | 47.51 |
| 4-(1-Methylvinyl)-1-cyclohexene-1-methanol | 41.99 | 42.6  |
| 4-(2-Furanyl)-2-butanone                   | 37.18 | 37.91 |
| 4-(3-Cyclohexen-1-yl)pyridine              | 49.37 | 49.8  |
| 4-(3-Phenylpropyl)pyridine                 | 62.44 | 62.85 |
| 4-(Ethylthio)-toluene                      | 48.89 | 49.08 |
| 4-(Methylthio)aniline                      | 44.05 | 43.5  |
| 4-(Pentyloxy)benzoyl chloride              | 61.69 | 61.86 |
| 4,4'-Diisocyanatodiphenylmethane           | 70.61 | 69.93 |
| 4,4-Dimethyl-1-pentene                     | 33.46 | 34.22 |
| 4,4-Dimethyl-1-pentyne                     | 32.52 | 32.49 |
| 4,4-Dimethyl-2-pentanone                   | 34.49 | 34.8  |
| 4,4-Dimethyl-2-pentyne                     | 33    | 33.03 |
| 4,4-Dimethylcyclohexanone                  | 36.65 | 37.29 |
| 4,4-Dimethylheptane                        | 43.78 | 43.79 |

|                                        |       |       |
|----------------------------------------|-------|-------|
| 4,5-Dichloro-1,3-dioxolan-2-one        | 27.19 | 26.94 |
| 4,5-Diethyloctane                      | 57.41 | 57.62 |
| 4,5-Dihydro-2-methylthiazole           | 28.82 | 29.13 |
| 4-Acetylmorpholine                     | 33.08 | 33.23 |
| 4-Acetylpyridine                       | 34.01 | 33.93 |
| 4-Allyl anisole                        | 46.65 | 46.8  |
| 4-Allyl-2-methoxyphenol                | 48.4  | 48.57 |
| 4-Allyl-2-methoxyphenyl acetate        | 58.07 | 58.02 |
| 4-Allylphenol                          | 41.52 | 42.05 |
| 4-Amino-1-butanol                      | 25.37 | 25.5  |
| 4-Benzylpiperidine                     | 54.62 | 55.67 |
| 4-Benzylpyridine                       | 53.21 | 53.59 |
| 4-Bromo-1,2-butadiene                  | 28.58 | 28.36 |
| 4-Bromo-1,2-dimethoxybenzene           | 47.71 | 47.15 |
| 4-Bromo-1-butene                       | 28.07 | 28.09 |
| 4-Bromo-2-methylhexane                 | 42.32 | 42.3  |
| 4-Bromoacetophenone                    | 43.92 | 43.82 |
| 4-Bromoanisole                         | 41.78 | 40.63 |
| 4-Bromobutyronitrile                   | 28.18 | 28.19 |
| 4-Bromocrotonic acid ethylester        | 39.98 | 39.21 |
| 4-Bromodiphenyl ether                  | 61.05 | 60.62 |
| 4-Bromophenyltrimethylsilane           | 57.19 | 57.8  |
| 4-Bromopyridine                        | 31.49 | 31.81 |
| 4-Bromotetradecane                     | 73.87 | 74.75 |
| 4-Bromotoluene                         | 38.9  | 38.92 |
| 4-Bromotridecane                       | 69.41 | 70.12 |
| 4-Butylacetophenone                    | 55.72 | 54.93 |
| 4-Butylmorpholine                      | 42.05 | 42.55 |
| 4-Butylphenol                          | 46.53 | 46.99 |
| 4-Chloro-1-(4-fluorophenyl)-1-butanone | 50.44 | 50.19 |
| 4-Chloro-1,2-butadiene                 | 25.32 | 25.42 |
| 4-Chloro-1-butanol                     | 26.9  | 26.87 |
| 4-Chloro-1-butene                      | 25.05 | 25.15 |
| 4-Chloro-1-phenyl-1-butanone           | 50.86 | 50.29 |
| 4-Chloro-1-trifluoromethoxybenzene     | 37.56 | 37.44 |
| 4-Chloro-2-pentene                     | 30.19 | 29.85 |
| 4-Chloroacetophenone                   | 41.62 | 41.05 |
| 4-Chloroaniline                        | 35.01 | 35.41 |
| 4-Chloroanisole                        | 37.19 | 37.86 |
| 4-Chlorobenzaldehyde                   | 37.74 | 36.67 |
| 4-Chlorobenzenemethanethiol            | 44.5  | 43.82 |
| 4-Chlorobutanal                        | 25.72 | 25.98 |

|                                    |       |       |
|------------------------------------|-------|-------|
| 4-Chlorobutanoic acid              | 27.65 | 27.06 |
| 4-Chlorobutanoyl chloride          | 30.79 | 30.92 |
| 4-Chlorobutyronitrile              | 25.02 | 25.25 |
| 4-Chlorodiphenyl ether             | 58.14 | 57.85 |
| 4-Chloroethylbenzene               | 40.72 | 40.78 |
| 4-Chloroheptane                    | 39.42 | 39.31 |
| 4-Chloronitrobenzene               | 37.95 | 38.01 |
| 4-Chloro-N-methylaniline           | 40.51 | 40.32 |
| 4-Chloropentanoic acid             | 31.61 | 31.65 |
| 4-Chlorophenol                     | 32.76 | 33.11 |
| 4-Chlorophenoxytriethylsilane      | 69.66 | 69.38 |
| 4-Chlorostyrene                    | 41.6  | 40.47 |
| 4-Chlorothiophenol                 | 38.56 | 39.33 |
| 4-Chlorotoluene                    | 35.68 | 36.15 |
| 4-Cumylphenol                      | 42.01 | 42.32 |
| 4-Decanol                          | 49.7  | 49.86 |
| 4-Decanone                         | 48.39 | 48.71 |
| 4-Diethylamino-2-butanol           | 43.99 | 44.42 |
| 4-Ethoxyacetanilide                | 51.79 | 51.55 |
| 4-Ethoxyaniline                    | 41.2  | 41.77 |
| 4-Ethoxytoluene                    | 42.54 | 42.51 |
| 4-Ethyl-2-methylhexane             | 43.82 | 43.73 |
| 4-Ethyl-2-propylthiophane          | 49.87 | 49.54 |
| 4-Ethyl-2-propylthiophane sulfone  | 50.15 | 50.38 |
| 4-Ethyl-3-oxa-1-heptanol           | 41.97 | 42.29 |
| 4-Ethyl-3-oxa-5-oxo-1-octanol      | 47.03 | 47.19 |
| 4-Ethyl-4-heptanol                 | 44.92 | 45.17 |
| 4-Ethylaniline                     | 40.21 | 40.03 |
| 4-Ethylheptane                     | 43.85 | 43.77 |
| 4-Ethyl-m-xylene                   | 45.34 | 45.58 |
| 4-Ethylnitrobenzene                | 42.74 | 42.63 |
| 4-Ethyl-o-xylene                   | 45.58 | 45.58 |
| 4-Ethylphenyldiallylphosphine      | 73.82 | 73.3  |
| 4-Ethylphenyldipropylphosphine     | 74.54 | 73.92 |
| 4-Ethylpyridine                    | 33.52 | 33.66 |
| 4-Ethylstyrene                     | 45.97 | 45.09 |
| 4-Ethyltoluene                     | 40.75 | 40.77 |
| 4-Fluoro-1-trichloromethoxybenzene | 47.36 | 47.47 |
| 4-Fluoro-1-trifluoromethoxybenzene | 32.49 | 32.52 |
| 4-Fluoro-2-methylaniline           | 34.66 | 35.3  |
| 4-Fluoroacetophenone               | 36.19 | 36.13 |

|                                       |       |       |
|---------------------------------------|-------|-------|
| 4-Fluoroanisole                       | 32.66 | 32.94 |
| 4-Fluorobenzeneacetonitrile           | 34.91 | 35.65 |
| 4-Fluorobenzonitrile                  | 31.77 | 31.02 |
| 4-Fluorobenzoyl chloride              | 36.47 | 36.69 |
| 4-Fluoriodobenzene                    | 38.54 | 38.99 |
| 4-Fluoronitrobenzene                  | 32.85 | 33.09 |
| 4-Fluorophenetole                     | 37.33 | 37.6  |
| 4-Fluorophenyltrimethylsilane         | 50.34 | 50.11 |
| 4-Fluorotoluene                       | 30.8  | 31.23 |
| 4-Formylmorpholine                    | 28.62 | 28.74 |
| 4-Heptanamine                         | 37.79 | 37.91 |
| 4-Heptanol                            | 35.97 | 35.97 |
| 4-Heptanone                           | 34.38 | 34.82 |
| 4-Heptanone ketazine                  | 73.34 | 73.08 |
| 4-Heptanone O-ethyloxime              | 48.65 | 48.62 |
| 4-Heptanone O-propyloxime             | 53.31 | 53.25 |
| 4-Heptanone oxime                     | 38.81 | 38.86 |
| 4-Heptyl bromide                      | 42.36 | 42.34 |
| 4-Hexen-2-ol                          | 31.36 | 31.14 |
| 4-Hexen-3-one                         | 30.15 | 29.99 |
| 4-Hexylacetophenone                   | 64.87 | 64.19 |
| 4H-Pyran-4-one                        | 24.7  | 23.91 |
| 4-Hydroxy-2-butanone                  | 23.52 | 22.34 |
| 4-Hydroxy-4-methyl-2-pentanone        | 31.4  | 31.55 |
| 4-Iodo-1,2-butadiene                  | 34.52 | 33.5  |
| 4-Iodotoluene                         | 43.14 | 43.9  |
| 4-Isopropyl-2-propylthiophane         | 54.28 | 54.13 |
| 4-Isopropyl-2-propylthiophane sulfone | 54.61 | 54.97 |
| 4-Isopropylbenzaldehyde               | 46.94 | 45.88 |
| 4-Isopropylcyclohexanone              | 41.83 | 41.86 |
| 4-Isopropylheptane                    | 48.48 | 48.36 |
| 4-Isopropylphenyldiallylphosphine     | 78.28 | 77.89 |
| 4-Isopropylpyridine                   | 37.74 | 38.25 |
| 4-Isopropylstyrene                    | 50.54 | 49.68 |
| 4-Methoxy-2-methylaniline             | 41.94 | 41.92 |
| 4-Methoxy-4-methyl-2-pentanone        | 36.53 | 36.43 |
| 4-Methoxy-alpha-methylbenzenemethanol | 43.62 | 43.9  |
| 4-Methoxyaniline                      | 36.96 | 37.11 |
| 4-Methoxybenzeneacetaldehyde          | 42.72 | 43    |
| 4-Methoxybenzeneacetonitrile          | 41.98 | 42.27 |
| 4-Methoxybenzenemethanamine           | 41.38 | 41.28 |
| 4-Methoxybenzenethiol                 | 45.38 | 45.52 |

|                                     |        |        |
|-------------------------------------|--------|--------|
| 4-Methoxyphenyldiallylphosphine     | 70.97  | 70.38  |
| 4-Methoxyphenyldibutylphosphine     | 80.86  | 80.26  |
| 4-Methoxyphenyldipentylphosphine    | 90.53  | 89.52  |
| 4-Methoxytoluene                    | 37.78  | 37.85  |
| 4-Methyl-1,3-dioxane                | 26.26  | 26.32  |
| 4-Methyl-1,3-dioxolane              | 21.48  | 21.69  |
| 4-Methyl-1-heptanol                 | 41.32  | 40.55  |
| 4-Methyl-1-hexene                   | 34.29  | 34.2   |
| 4-Methyl-1H-imidazole               | 23.33  | 23.25  |
| 4-Methyl-1-pentene                  | 29.54  | 29.57  |
| 4-Methyl-1-pentyne                  | 28.05  | 27.84  |
| 4-Methyl-2-(1-hexen-5-yl)phenol     | 60.48  | 60.75  |
| 4-Methyl-2,6-di(3-hexen-2-yl)phenol | 88.36  | 88.54  |
| 4-Methyl-2,6-dicrotylphenol         | 69.58  | 70.1   |
| 4-Methyl-2-crotylphenol             | 50.75  | 51.6   |
| 4-Methyl-2-heptanol                 | 41.4   | 40.56  |
| 4-Methyl-2-hexanamine               | 37.69  | 37.87  |
| 4-Methyl-2-nitrophenol              | 40.78  | 39.77  |
| 4-Methyl-2-pentanol                 | 31.35  | 31.3   |
| 4-Methyl-2-pentenoic acid           | 32.12  | 31.28  |
| 4-Methyl-2-pentyne                  | 28.35  | 28.38  |
| 4-Methyl-3-heptanol                 | 40.68  | 40.56  |
| 4-Methyl-3-penten-2-ol              | 31.28  | 31.21  |
| 4-Methyl-4-heptanol                 | 40.44  | 40.54  |
| 4-Methylacetophenone                | 41.46  | 41.04  |
| 4-Methylbenzaldehyde                | 37.29  | 36.66  |
| 4-Methylbenzeneacetaldehyde         | 40.94  | 41.29  |
| 4-Methylbenzeneacetonitrile         | 40.14  | 40.56  |
| 4-Methylbenzenemethanamine          | 39.57  | 39.57  |
| 4-Methylbenzenepropanal             | 45.46  | 45.92  |
| 4-Methylbenzoyl chloride            | 42.44  | 41.6   |
| 4-Methyl-cis-2-pentene              | 29.14  | 29.68  |
| 4-Methylcyclohexanemethanol         | 38.82  | 38.37  |
| 4-Methylcyclohexanone               | 32.68  | 32.64  |
| 4-Methylcyclohexene                 | 31.81  | 32.17  |
| 4-Methylcyclohexyl acrylate         | 47.86  | 47.71  |
| 4-Methylcyclopentene                | 27.28  | 27.54  |
| 4-Methyldecane                      | 53.01  | 53.03  |
| 4-Methyldocosane                    | 108.68 | 108.59 |
| 4-Methyldodecane                    | 62.27  | 62.29  |
| 4-Methyleicosane                    | 99.41  | 99.33  |
| 4-Methylene-1-isopropylcyclohexene  | 45.81  | 45.89  |



|                                                      |        |        |
|------------------------------------------------------|--------|--------|
| 4-Methylene-2-oxetanone                              | 20.29  | 19.66  |
| 4-Methylheneicosane                                  | 103.99 | 103.96 |
| 4-Methylheptadecane                                  | 85.54  | 85.44  |
| 4-Methylheptane                                      | 39.12  | 39.14  |
| 4-Methylhexadecane                                   | 80.87  | 80.81  |
| 4-Methylnonadecane                                   | 94.77  | 94.7   |
| 4-Methylnonane                                       | 48.38  | 48.4   |
| 4-Methyloctadecane                                   | 90.09  | 90.07  |
| 4-Methyloctane                                       | 43.8   | 43.77  |
| 4-Methyloxazole                                      | 21.22  | 21.12  |
| 4-Methylpent-3-en-2-one                              | 30.13  | 30.06  |
| 4-Methylpentadecane                                  | 76.2   | 76.18  |
| 4-Methylpentyl 4-methylpentoxy dithiophosphinic acid | 83.44  | 83.68  |
| 4-Methylpentyl dichloro phosphorus oxide             | 47.74  | 48.12  |
| 4-Methylpentyl dichloro phosphorus thioxide          | 56.57  | 56.43  |
| 4-Methylpentyl isopropoxy dithiophosphinic acid      | 70     | 69.84  |
| 4-Methylpentyl octyloxy dithiophosphinic acid        | 92.24  | 92.98  |
| 4-Methylphenethyl alcohol                            | 41.73  | 42.18  |
| 4-Methylpiperidine                                   | 30.48  | 31.11  |
| 4-Methylpyridine                                     | 28.87  | 29.03  |
| 4-Methylpyrimidine                                   | 26.88  | 26.26  |
| 4-Methylquinoline                                    | 46.44  | 46.6   |
| 4-Methylstyrene                                      | 40.55  | 40.46  |
| 4-Methyltetradecane                                  | 71.46  | 71.55  |
| 4-Methyl-trans-2-pentene                             | 29.76  | 29.68  |
| 4-Methyltridecane                                    | 66.76  | 66.92  |
| 4-Methylundecane                                     | 57.74  | 57.66  |
| 4-Methylvaleronitrile                                | 29.71  | 29.67  |
| 4-Morpholinamine                                     | 27.26  | 27.47  |
| 4-Morpholineethanamine                               | 36.8   | 36.72  |
| 4-Morpholineethanol                                  | 34.56  | 34.7   |
| 4-Morpholinepropanamine                              | 41.29  | 41.35  |
| 4-Nitroanisole                                       | 39.61  | 39.71  |
| 4-Nitromethyltoluene                                 | 41.42  | 41.88  |
| 4-Nonanol                                            | 45.03  | 45.23  |
| 4-Nonanone                                           | 43.85  | 44.08  |
| 4-Nonylphenol                                        | 69.72  | 70.14  |
| 4-Octanol                                            | 40.66  | 40.6   |
| 4-Octanone                                           | 39.61  | 39.45  |
| 4-Octylacetophenone                                  | 74.35  | 73.45  |
| 4-Octyne                                             | 37.51  | 37.68  |
| 4-Oxa-6-oxo-2-nonanol                                | 42.3   | 42.56  |

|                                 |        |        |
|---------------------------------|--------|--------|
| 4-Oxo-1-heptanol                | 35.8   | 36.23  |
| 4-Oxopentanal                   | 25.3   | 26.08  |
| 4-Oxopentanoic acid             | 26.98  | 27.16  |
| 4-Penten-1-ol                   | 26.36  | 26.39  |
| 4-Penten-2-ol                   | 26.19  | 26.4   |
| 4-Pentenal                      | 24.94  | 25.5   |
| 4-Pentenitrile                  | 24.98  | 24.77  |
| 4-Pentenoic acid                | 26.27  | 26.58  |
| 4-Pentylphenol                  | 52.62  | 51.62  |
| 4-Pentyn-1-ol                   | 24.35  | 24.66  |
| 4-Phenoxyphenyldiallylphosphine | 89.52  | 90.37  |
| 4-Phenyl-1,3-dioxane            | 46     | 46.25  |
| 4-Phenyl-2-butanone             | 45.08  | 45.49  |
| 4-Piperidineethanol             | 37.18  | 37.15  |
| 4-Propyldecane                  | 62.4   | 62.29  |
| 4-Propyldocosane                | 117.84 | 117.85 |
| 4-Propyldodecane                | 71.58  | 71.55  |
| 4-Propylheneicosane             | 113.33 | 113.22 |
| 4-Propylheptane                 | 48.51  | 48.4   |
| 4-Propylnonane                  | 57.64  | 57.66  |
| 4-Propyloctane                  | 53.02  | 53.03  |
| 4-Propylphenol                  | 42.21  | 42.36  |
| 4-Propylpyridine                | 37.77  | 38.29  |
| 4-Propyltoluene                 | 45.59  | 45.4   |
| 4-Propyltridecane               | 76.22  | 76.18  |
| 4-Propylundecane                | 66.97  | 66.92  |
| 4-Pyridineethanamine            | 37.1   | 37.09  |
| 4-Pyridinemethanamine           | 32.11  | 32.46  |
| 4-s-Butylaniline                | 49.04  | 49.25  |
| 4-s-Butylphenol                 | 46.18  | 46.95  |
| 4-t-Butyl-2-methylphenol        | 51.99  | 51.78  |
| 4-t-Butylacetophenone           | 55.43  | 54.91  |
| 4-t-Butylaniline                | 49.01  | 49.27  |
| 4-t-Butylbenzaldehyde           | 51.42  | 50.53  |
| 4-t-Butylphenol                 | 46.89  | 46.97  |
| 4-t-Butylpyridine               | 43.15  | 42.9   |
| 4-tert-Butyltoluene             | 49.92  | 50.01  |
| 4-Tetradecanol                  | 68.58  | 68.38  |
| 4-Tolyl dibutoxyborine          | 76.67  | 76.43  |
| 4-Tolyl diethoxyborine          | 58.04  | 57.91  |
| 4-Tolyl dimethoxyborine         | 48.49  | 48.59  |
| 4-Tolyl dipropoxyborine         | 67.42  | 67.17  |

|                                        |        |        |
|----------------------------------------|--------|--------|
| 4-Tolylacetate                         | 43.17  | 42.55  |
| 4-Tolyldiallylphosphine                | 67.88  | 68.67  |
| 4-Tolyliodoacetylene                   | 50.94  | 51.48  |
| 4-Tolylphosphorous diaziride           | 63.97  | 63.71  |
| 4-Tridecanol                           | 63.88  | 63.75  |
| 4-Trifluoromethylaniline               | 35.77  | 35.68  |
| 4-Trifluoromethylphenyltrimethylsilane | 54.63  | 55.3   |
| 4-Trimethylsiloxyphenyltrimethylsilane | 74.63  | 74.54  |
| 4-Vinylcyclohexene                     | 35.96  | 36.49  |
| 4-Vinylpyridine                        | 33.64  | 33.35  |
| 5-(Chloromethyl)-1,3-benzodioxole      | 42.42  | 42.24  |
| 5,5-Dimethyl-1-hexen-3-yne             | 37.27  | 37.35  |
| 5,5-Dimethyl-1-hexene                  | 39     | 38.85  |
| 5,6,7,8-Tetrahydro-1-naphthalenamine   | 46.76  | 47.33  |
| 5,6,7,8-Tetrahydroquinoline            | 40.78  | 41.13  |
| 5,6-Dibutyldecane                      | 85.14  | 85.4   |
| 5-Amino-1-pentanol                     | 29.88  | 30.13  |
| 5-Amino-2-butoxypyridine               | 50.08  | 49.29  |
| 5-Aminomethyl-1,3-benzodioxole         | 40.47  | 40.87  |
| 5-Bromo-1-pentene                      | 32.69  | 32.72  |
| 5-Bromo-3-bromomethyl-2-methyloctane   | 64.48  | 63.89  |
| 5-Bromo-3-bromomethyloctane            | 59.08  | 59.3   |
| 5-Bromoacenaphthene                    | 59.55  | 59.55  |
| 5-Bromononane                          | 51.91  | 51.6   |
| 5-Bromovaleronitrile                   | 32.79  | 32.82  |
| 5-Butyldocosane                        | 122.37 | 122.48 |
| 5-Butylnonane                          | 62.04  | 62.29  |
| 5-Chloro-2-pentanone                   | 30.05  | 30.36  |
| 5-Chloroacenaphthene                   | 56.07  | 56.78  |
| 5-Chloropentanoyl chloride             | 35.35  | 35.55  |
| 5-Chlorovaleric acid                   | 31.61  | 31.69  |
| 5-Cyclohexyleicosane                   | 120.36 | 120.3  |
| 5-Decanol                              | 49.95  | 49.86  |
| 5-Decyn-1-ol                           | 47.91  | 48.35  |
| 5-Decyne                               | 46.73  | 46.94  |
| 5-Ethyl-2-norbornene                   | 39.14  | 39.21  |
| 5-Ethylidene-2-norbornene              | 38.91  | 39.12  |
| 5-Ethyl-m-xylene                       | 45.71  | 45.58  |
| 5-Hexenoic acid                        | 30.95  | 31.21  |
| 5-Hexyn-2-one                          | 27.76  | 28.15  |
| 5-Hydroxy-2-pentanone                  | 26.68  | 26.97  |
| 5-Iodoacenaphthene                     | 64.03  | 64.53  |

|                                          |        |        |
|------------------------------------------|--------|--------|
| 5-Isopropyl-2-methylphenol               | 46.96  | 47.13  |
| 5-Methoxy-1-cyclohexyl-1-pentanol        | 58.52  | 58.6   |
| 5-Methoxy-1-phenyl-1-pentanol            | 57.3   | 57.56  |
| 5-Methoxy-2-pentanol                     | 33.19  | 33     |
| 5-Methoxy-2-pentanone                    | 31.47  | 31.85  |
| 5-Methyl-1-heptanol                      | 41.03  | 40.55  |
| 5-Methyl-1-hexanol                       | 35.71  | 35.92  |
| 5-Methyl-1-hexene                        | 34.36  | 34.2   |
| 5-Methyl-1-hexyne                        | 32.47  | 32.47  |
| 5-Methyl-2(3H)-furanone                  | 24.21  | 24.4   |
| 5-Methyl-2(5H)-furanone                  | 24.17  | 24.71  |
| 5-Methyl-2,3-hexanedione                 | 35.12  | 35.05  |
| 5-Methyl-2-ethylcoumaran                 | 49.87  | 49.82  |
| 5-Methyl-2-furanmethanol                 | 29.86  | 29.9   |
| 5-Methyl-2-hexanol                       | 35.98  | 35.93  |
| 5-Methyl-2-hexanone oxime                | 38.71  | 38.82  |
| 5-Methyl-2-hexyne                        | 32.82  | 33.01  |
| 5-Methyl-2-isopropylcyclohexanol acetate | 57.31  | 57.2   |
| 5-Methyl-3-heptanol                      | 40.17  | 40.56  |
| 5-Methyl-3-hexanol                       | 35.45  | 35.93  |
| 5-Methyl-3-hexen-2-one                   | 34.55  | 34.58  |
| 5-Methyl-5-hexen-2-one                   | 34.59  | 34.58  |
| 5-Methylbenzo[b]thiophene                | 46.56  | 46.04  |
| 5-Methyldecane                           | 53.05  | 53.03  |
| 5-Methyldocosane                         | 108.73 | 108.59 |
| 5-Methyldodecane                         | 62.15  | 62.29  |
| 5-Methyleicosane                         | 99.44  | 99.33  |
| 5-Methylheneicosane                      | 104.03 | 103.96 |
| 5-Methylheptadecane                      | 85.52  | 85.44  |
| 5-Methylhexadecane                       | 80.92  | 80.81  |
| 5-Methylisoxazole                        | 21.35  | 21.54  |
| 5-Methylnonadecane                       | 94.78  | 94.7   |
| 5-Methylnonane                           | 48.29  | 48.4   |
| 5-Methyloctadecane                       | 90.13  | 90.07  |
| 5-Methylpentadecane                      | 76.2   | 76.18  |
| 5-Methylquinoline                        | 46.55  | 46.6   |
| 5-Methyltetradecane                      | 71.48  | 71.55  |
| 5-Methyltetralin                         | 47.49  | 48.07  |
| 5-Methyltricosane                        | 113.37 | 113.22 |
| 5-Methyltridecane                        | 66.94  | 66.92  |
| 5-Methylundecane                         | 57.6   | 57.66  |
| 5-Methyluracil                           | 28.33  | 29.16  |

|                                                                |        |        |
|----------------------------------------------------------------|--------|--------|
| 5-Nonanol                                                      | 45.23  | 45.23  |
| 5-Nonanone                                                     | 43.76  | 44.08  |
| 5-Oxohexanoic acid                                             | 31.78  | 31.79  |
| 5-Phenyl-1-pentanol                                            | 50.98  | 51.26  |
| 5-Phenyl-4-nonene                                              | 67.14  | 68.24  |
| 5-Phenyleicosane                                               | 119.95 | 119.26 |
| 5-Phenylnonane                                                 | 68.42  | 68.33  |
| 5-Propyl-4-tridecanol                                          | 77.2   | 77.6   |
| 6,6-Dimethylbicyclo(3.1.1)heptan-2-one                         | 39.94  | 39.7   |
| 6,6-Dimethylbicyclo[3.1.1]hept-2-ene-2-ethanol                 | 49.66  | 49.97  |
| 6,7-Diamyldodecane                                             | 104.05 | 103.92 |
| 6-Bromo-2-hexanone                                             | 37.62  | 37.93  |
| 6-Bromoundecane                                                | 61.36  | 60.86  |
| 6-Chloro-1-hexanol                                             | 36.2   | 36.13  |
| 6-Dodecyne                                                     | 56.3   | 56.2   |
| 6-Heptenoic acid                                               | 35.53  | 35.84  |
| 6-Methyl-1-heptanol                                            | 40.74  | 40.55  |
| 6-Methyl-1-heptene                                             | 39.02  | 38.83  |
| 6-Methyl-2-heptanol                                            | 40.42  | 40.56  |
| 6-Methyl-2-heptanol acetate                                    | 50.69  | 50.16  |
| 6-Methyl-2-heptanone                                           | 39.49  | 39.41  |
| 6-Methyl-3-heptanol                                            | 40.54  | 40.56  |
| 6-Methyl-4-octanone                                            | 43.82  | 44.04  |
| 6-Methyldodecane                                               | 62.38  | 62.29  |
| 6-Methylpentadecane                                            | 76.06  | 76.18  |
| 6-Methylquinoline                                              | 46.95  | 46.6   |
| 6-Methyltetradecane                                            | 71.58  | 71.55  |
| 6-Methyltridecane                                              | 66.89  | 66.92  |
| 6-Methylundecane                                               | 57.71  | 57.66  |
| 6-Oxabicyclo[3.1.0]hexane                                      | 22.71  | 22.72  |
| 6-Undecanol                                                    | 53.89  | 54.49  |
| 6-Undecanone                                                   | 52.63  | 53.34  |
| 6-Vinyl-6-methyl-1-isopropyl-3-(1-methylethylidene)cyclohexene | 69.94  | 68.89  |
| 7-(3-Phenylpropyl)-7-tridecanol                                | 102.74 | 102.14 |
| 7,8-Dimethyltetradecane                                        | 75.79  | 76.14  |
| 7-Bromo-1,5,5-trichloroheptane                                 | 56.55  | 56.72  |
| 7-Butyl-7-tridecanol                                           | 82.37  | 82.21  |
| 7-Butyltridecane                                               | 80.6   | 80.81  |
| 7-Chloro-1-heptanol                                            | 40.78  | 40.76  |
| 7-Chloroheptanonitrile                                         | 39.09  | 39.14  |
| 7-Hexyl-7-pentadecanol                                         | 100.13 | 100.73 |

|                                        |        |        |
|----------------------------------------|--------|--------|
| 7-Hexylpentadecane                     | 99.03  | 99.33  |
| 7-Methylpentadecane                    | 76.16  | 76.18  |
| 7-Methylquinoline                      | 47.1   | 46.6   |
| 7-Methyltetradecane                    | 71.52  | 71.55  |
| 7-Methyltridecane                      | 66.99  | 66.92  |
| 7-Oxabicyclo[4.1.0]heptane             | 27.4   | 27.35  |
| 7-Phenyl-6-tridecene                   | 86.36  | 86.76  |
| 7-Phenyltridecane                      | 86.79  | 86.85  |
| 8-Chloroquinoline                      | 45.97  | 46.61  |
| 8-Heptyl-7-pentadecene                 | 104.1  | 103.87 |
| 8-Heptylpentadecane                    | 104.17 | 103.96 |
| 8-Methylpentadecane                    | 76.17  | 76.18  |
| 8-Methylquinoline                      | 46.7   | 46.6   |
| 8-Propyl-8-pentadecanol                | 87.07  | 86.84  |
| 8-Propylpentadecane                    | 85.52  | 85.44  |
| 9,10,11,12-Tetrapropyleicosane         | 149.43 | 150.14 |
| 9,10-Benzophenanthrene                 | 81.33  | 80.4   |
| 9,10-Dimethyloctadecane                | 93.56  | 94.66  |
| 9,10-Dipropyloctadecane                | 112.92 | 113.18 |
| 9-Bromo-1,5,5-trichlorononane          | 66.1   | 65.98  |
| 9-Decen-1-ol                           | 49.53  | 49.54  |
| 9-Decyn-1-ol                           | 47.91  | 47.81  |
| 9-Heptylheptadecane                    | 112.87 | 113.22 |
| 9-methyl-8-heptadecene                 | 85.25  | 85.35  |
| Acenaphthene                           | 51.84  | 51.96  |
| Acetaldehyde                           | 11.52  | 11.92  |
| Acetaldoxime                           | 15.69  | 15.91  |
| Acetamide                              | 15.21  | 14.55  |
| Acetic acid                            | 13.05  | 13     |
| Acetic acid 1,3-dichloroisopropylester | 36.17  | 36.65  |
| Acetic acid 1-chloroethylester         | 27.3   | 27.33  |
| Acetic acid 2-bromoethylester          | 30.04  | 30.15  |
| Acetic acid 2-chloroethylester         | 26.51  | 27.21  |
| Acetic acid 2-phenoxyethylester        | 48.47  | 48.71  |
| Acetic acid 3-chloropropylester        | 32.48  | 31.84  |
| Acetic anhydride                       | 22.37  | 22.45  |
| Acetoacetic acid butylester            | 40.85  | 41.2   |
| Acetoin                                | 22.06  | 22.35  |
| Acetol                                 | 17.69  | 17.71  |
| Acetone dibutoxyketal                  | 56.22  | 56.18  |
| Acetone glycerol                       | 32.63  | 32.31  |
| Acetone oxime                          | 20.11  | 20.34  |

|                               |       |       |
|-------------------------------|-------|-------|
| Acetonitrile                  | 11.08 | 11.19 |
| Acetonylacetone               | 29.86 | 30.46 |
| Acetophenone                  | 36.51 | 36.23 |
| Acetoxime O-ethyl ether       | 25.94 | 25.67 |
| Acetoxime O-methyl ether      | 21.22 | 21.01 |
| Acetoxime O-propyl ether      | 30.42 | 30.3  |
| Acetoxyacetic acid ethylester | 33.37 | 33.42 |
| Acetoxyacetone                | 26.98 | 27.31 |
| Acetylacetone (enol form)     | 27.65 | 26.62 |
| Acetylbromide                 | 19.82 | 19.81 |
| Acetylchloride                | 16.78 | 16.86 |
| Acetylcyanide                 | 16.28 | 16.09 |
| Acetylhexane                  | 37.42 | 37.27 |
| Acetylmesitylene              | 50.36 | 50.66 |
| Acrylic acid                  | 17.44 | 17.32 |
| Acrylic acid chloride         | 21.18 | 21.18 |
| Adamantane                    | 41.65 | 41.86 |
| Adiponitrile                  | 29.34 | 29.5  |
| Allicin                       | 47.25 | 47.05 |
| Allyl 2-furancarboxylate      | 39.76 | 39.08 |
| Allyl acetate                 | 26.45 | 26.73 |
| Allyl alcohol                 | 16.98 | 17.13 |
| Allyl benzoate                | 46.49 | 46.66 |
| Allyl bromide                 | 24.13 | 23.46 |
| Allyl butyrate                | 35.66 | 35.99 |
| Allyl chloride                | 20.47 | 20.52 |
| Allyl chloroformate           | 26.96 | 27.12 |
| Allyl cyanide                 | 19.76 | 20.14 |
| Allyl ether                   | 29.84 | 30.99 |
| Allyl ethyl ether             | 26.57 | 26.67 |
| Allyl glycidyl ether          | 30.6  | 30.86 |
| Allyl iodide                  | 29.13 | 28.6  |
| Allyl methacrylate            | 35.34 | 35.75 |
| Allyl methyl ether            | 21.58 | 22.01 |
| Allyl phenyl ether            | 41.73 | 42.02 |
| Allyl propanoate              | 30.98 | 31.36 |
| Allyl sulfide                 | 37    | 37.22 |
| Allyl trans-cinnamate         | 55.48 | 55.72 |
| Allyl vinyl ether             | 26.17 | 25.97 |
| Allylacetoacetate             | 36.13 | 36.26 |
| Allylacrylate                 | 30.81 | 31.05 |
| Allylamine                    | 19.08 | 19.15 |

|                                                 |       |       |
|-------------------------------------------------|-------|-------|
| Allylchlorodimethylsilane                       | 37.98 | 38.71 |
| Allylcyclopentane                               | 36.71 | 36.69 |
| Allyldiethylamine                               | 38.39 | 38.06 |
| Allyldimethylamine                              | 29.16 | 28.88 |
| Allylmethyldichlorosilane                       | 38.14 | 38.5  |
| Allyltrichlorosilane                            | 38.97 | 38.33 |
| Allyltriethoxysilane                            | 55.73 | 55.49 |
| Allyltrimethylsilane                            | 39.14 | 39.22 |
| alpha-(Chloromethyl)benzenemethanol             | 41.98 | 42.18 |
| alpha,alpha-Dichloroacetoacetic acid ethylester | 41.3  | 41.57 |
| alpha,alpha-Dichloroacetophenone                | 46.19 | 45.89 |
| alpha,alpha-Dimethylacetoacetic acid ethylester | 40.78 | 41.18 |
| alpha-Allylbenzenemethanol                      | 45.52 | 46.33 |
| alpha-Bromoacetoacetic acid ethylester          | 40.28 | 39.73 |
| alpha-Chloroacetoacetic acid ethylester         | 36.52 | 36.7  |
| alpha-Chlorobenzeneacetyl chloride              | 45.8  | 46.18 |
| alpha-Chlorohydrin                              | 23.74 | 23.66 |
| alpha-Chlorostyrene                             | 40.8  | 40.57 |
| alpha-Curcumene                                 | 67.46 | 68.38 |
| alpha-D-Glucose                                 | 36.02 | 36.4  |
| alpha-Ethylstyrene                              | 45.95 | 44.98 |
| alpha-Humulene                                  | 67.93 | 68.97 |
| alpha-Ionol                                     | 61.35 | 61.22 |
| alpha-Ionone                                    | 61.25 | 60.07 |
| alpha-Irone                                     | 65.09 | 64.66 |
| alpha-Linolenic acid                            | 86.31 | 86.48 |
| alpha-Methyl benzylamine                        | 39.45 | 39.32 |
| alpha-Methyl-2-furanmethanol                    | 29.8  | 29.8  |
| alpha-Methyl-4-isopropylbenzenepropanal         | 59.85 | 59.73 |
| alpha-Methyl-4-morpholineethanol                | 39.37 | 39.34 |
| alpha-Methylbenzeneacetaldehyde                 | 40.27 | 41.07 |
| alpha-Methylbenzeneacetic acid                  | 41.75 | 42.15 |
| alpha-Methylbenzenepropanol                     | 45.91 | 46.64 |
| alpha-Methylcyclohexanemethanol                 | 38.24 | 38.42 |
| alpha-Methylcyclopropanemethanol                | 25.35 | 24.53 |
| alpha-Methylstyrene                             | 40.63 | 40.35 |
| alpha-Naphthaleneazide                          | 53    | 53.25 |
| alpha-Pentylcinnamaldehyde                      | 65.17 | 64.13 |
| alpha-Phellandrene                              | 45.28 | 45.89 |
| alpha-Phenylacetoacetic acid ethylester         | 57.54 | 57.36 |
| alpha-Pinene                                    | 43.96 | 43.93 |
| alpha-Santalol                                  | 67.22 | 66.29 |



|                         |       |       |
|-------------------------|-------|-------|
| alpha-Terpinene         | 45.96 | 46    |
| alpha-Terpineol         | 47.19 | 47.49 |
| alpha-Terpineol acetate | 56.59 | 57.09 |
| alpha-Vetivone          | 67.95 | 67.33 |
| Amyl acetate            | 36.23 | 36.3  |
| Amyl formate            | 31.75 | 31.8  |
| Amyl propionate         | 40.75 | 40.93 |
| Amyl thiocyanate        | 37.74 | 37.79 |
| Amylamine               | 28.78 | 28.72 |
| Amylbenzene             | 49.73 | 49.85 |
| Amylobarbitone          | 57.51 | 57.31 |
| Amylsilane              | 35.64 | 35.67 |
| Amylsulfinyl chloride   | 39.36 | 39.64 |
| Anabasine               | 48.91 | 48.71 |
| Anatabine               | 48.02 | 48.51 |
| Angelic acid            | 27.01 | 26.76 |
| Aniline                 | 30.8  | 30.59 |
| Anise alcohol           | 39.21 | 39.26 |
| Anisole                 | 32.94 | 33.04 |
| Anisyl methyl ketone    | 47.08 | 47.38 |
| Anthracene              | 62.99 | 62.44 |
| Apiole                  | 60.26 | 59.43 |
| Arachic alcohol         | 95.83 | 96.15 |
| Arachidic acid          | 96.99 | 96.34 |
| Arecoline               | 42.5  | 42.49 |
| Ascaridole              | 47.04 | 47.94 |
| Aspon                   | 94.44 | 95.18 |
| Azepane                 | 31.61 | 31.15 |
| Azetidine               | 17.44 | 17.26 |
| Azidobenzene            | 35.41 | 35.29 |
| Azocane                 | 35.38 | 35.78 |
| Azomethane              | 19.78 | 20.02 |
| Benzal bromide          | 47.22 | 46.61 |
| Benzalaniline           | 59.73 | 59.02 |
| Benzalchloride          | 40.73 | 40.99 |
| Benzaldehyde            | 32.32 | 31.85 |
| Benzedrine              | 44.03 | 43.95 |
| Benzene                 | 26.26 | 26.52 |
| Benzeneazoethane        | 44.92 | 44.26 |
| Benzenesulfonylchloride | 41.03 | 40.78 |
| Benzenethiol            | 34.47 | 34.51 |
| Benzhydryl chloride     | 60.42 | 60.65 |

|                            |       |       |
|----------------------------|-------|-------|
| Benzo[a]phenanthrene       | 81.33 | 80.4  |
| Benzo[b]furan              | 35.08 | 35.13 |
| Benzo[c]isoxazole          | 33.36 | 32.65 |
| Benzo[d]isoxazole          | 32.7  | 32.92 |
| Benzonitrile               | 31.51 | 31.12 |
| Benzophenone               | 56.69 | 56.16 |
| Benzophenoneimine          | 58.62 | 59.11 |
| Benzophenone-N-methylimine | 63.74 | 63.73 |
| Benzotrifluoride           | 30.76 | 31.61 |
| Benzoxazole                | 32.74 | 33.67 |
| Benzoyl bromide            | 39.6  | 39.74 |
| Benzoyl chloride           | 37.15 | 36.79 |
| Benzyl 3-methylbutanoate   | 55.53 | 56.19 |
| Benzyl acetate             | 42.03 | 42.34 |
| Benzyl acrylate            | 46.2  | 46.66 |
| Benzyl alcohol             | 32.55 | 32.74 |
| Benzyl benzoate            | 62.44 | 62.27 |
| Benzyl butanoate           | 51.14 | 51.6  |
| Benzyl chloroacetate       | 47.58 | 47.14 |
| Benzyl chloroformate       | 43.33 | 42.73 |
| Benzyl ethyl ether         | 41.94 | 42.28 |
| Benzyl formate             | 38.01 | 37.84 |
| Benzyl isobutyrate         | 50.57 | 51.56 |
| Benzyl isonitrile          | 36.6  | 36.24 |
| Benzyl laurate             | 87.69 | 88.64 |
| Benzyl mercaptan           | 38.79 | 39    |
| Benzyl methacrylate        | 50.64 | 51.36 |
| Benzyl methyl ether        | 37.35 | 37.62 |
| Benzyl nitrite             | 37.45 | 37.43 |
| Benzylamine                | 34.27 | 34.76 |
| Benzylbromide              | 39.32 | 39.07 |
| Benzylcarbinol isobutyrate | 55.58 | 56.19 |
| Benzylethylamine           | 43.41 | 43.96 |
| Benzylidene fluoride       | 30.77 | 31.22 |
| Benzylisopropylamine       | 49.42 | 48.52 |
| Benzylisothiocyanate       | 45.69 | 45.97 |
| Benzylmethylamine          | 39.18 | 39.37 |
| Benzylmethylsulfide        | 43.63 | 43.67 |
| Benzylsalicylate           | 64.42 | 64.04 |
| Benzyl-t-butanol           | 50.84 | 51.21 |
| Benzyltrimethylsilane      | 55.11 | 54.83 |
| beta-Chlorostyrene         | 41.47 | 40.45 |

|                                         |        |        |
|-----------------------------------------|--------|--------|
| beta-Citronellol                        | 49.73  | 49.68  |
| beta-Cyclocitral                        | 46.46  | 46.74  |
| beta-Elemene                            | 67.94  | 68.56  |
| beta-Farnesene                          | 70.64  | 70.78  |
| beta-Ionol                              | 61.51  | 61.33  |
| beta-Methylbenzeneethanamine            | 43.96  | 43.98  |
| beta-Methylbenzenepropanoic acid        | 46.31  | 46.78  |
| beta-Phellandrene                       | 45.33  | 45.78  |
| beta-Santalol                           | 67.76  | 68.25  |
| beta-Terpineol                          | 47.33  | 47.38  |
| beta-Vetivone                           | 67.53  | 67.33  |
| Bicyclo[2.2.1]hept-5-ene-2-carbaldehyde | 34.65  | 35.21  |
| Bicyclo[2.2.1]hept-5-ene-2-carbonitrile | 34.4   | 34.48  |
| Bicyclohexane                           | 53.22  | 53.34  |
| Bicyclopophosphate                      | 32.47  | 33.12  |
| Bicyclopophsite                         | 33.6   | 34.21  |
| Bicyclothiophosphate                    | 39.71  | 40.65  |
| Bis(1-chloroethyl)ether                 | 32.63  | 32.19  |
| Bis(1-phenylethyl)amine                 | 72.94  | 73.01  |
| Bis(2-bromoethyl) ether                 | 37.78  | 37.83  |
| Bis(2-butoxyethyl)phosphite             | 72.43  | 72.3   |
| Bis(2-chloroethoxy-2-ethyl) fumarate    | 74.62  | 73.98  |
| Bis(2-chloroethoxy-2-ethyl) maleate     | 74.17  | 73.98  |
| Bis(2-chloroethyl) ether                | 31.56  | 31.95  |
| Bis(2-chloroethyl)carbonate             | 38     | 38.1   |
| Bis(2-cyanoethyl) ether                 | 31.18  | 31.19  |
| Bis(2-ethoxyethyl)phosphite             | 53.87  | 53.78  |
| Bis(2-ethylhexyl) adipate               | 107.47 | 107.42 |
| Bis(2-ethylhexyl) azelate               | 120.27 | 121.31 |
| Bis(2-ethylhexyl) phosphite             | 87.18  | 87.36  |
| Bis(2-ethylhexyl) sebacate              | 125.97 | 125.94 |
| Bis(2-furfuryl)amine                    | 48.52  | 48.73  |
| Bis(2-heptoxyethyl)phosphite            | 100.4  | 100.08 |
| Bis(2-hexoxyethyl)phosphite             | 91.11  | 90.82  |
| Bis(2-hydroxyethyl) sulfide             | 31.55  | 31.4   |
| Bis(2-hydroxyethyl)ammonium hexanoate   | 58.49  | 58.34  |
| Bis(2-hydroxyethyl)methylamine          | 31.79  | 31.97  |
| Bis(2-hydroxyethyl)phosphine            | 34.06  | 33.66  |
| Bis(2-mercaptoethyl) sulfide            | 44.51  | 43.92  |
| Bis(2-methallyl) carbonate              | 47.3   | 46.54  |
| Bis(2-methoxyethyl)phosphite            | 44.47  | 44.46  |
| Bis(2-pentoxyethyl)phosphite            | 81.83  | 81.56  |

|                                                   |        |        |
|---------------------------------------------------|--------|--------|
| Bis(2-propoxyethyl)phosphite                      | 63.16  | 63.04  |
| Bis(2-tolyl)-N-ethylaminoborane                   | 79.12  | 78.87  |
| Bis(2-tolyl)-N-isobutylaminoborane                | 88.08  | 88.09  |
| Bis(2-tolyl)-N-methylaminoborane                  | 74     | 74.28  |
| Bis(3-aminopropyl)amine                           | 39.81  | 40.15  |
| Bis(3-chloropropyl) ether                         | 41.24  | 41.21  |
| Bis(4-tolyl) ether                                | 62.82  | 62.65  |
| Bis(allylamino)borane                             | 40.89  | 41.33  |
| Bis(butoxy fluoro oxophosphorus) oxide            | 58.64  | 58.54  |
| Bis(butylamino)borane                             | 51.24  | 51.21  |
| Bis(butylthio) 2-(diethylmethylsilyl)ethyl borane | 101.77 | 102.28 |
| Bis(butylthio) hexyl borane                       | 88.58  | 88.16  |
| Bis(butylthio) octyl borane                       | 98.3   | 97.42  |
| Bis(butylthio)borane                              | 60.17  | 60.27  |
| Bis(chlorofluorooxophosphorus) oxide              | 28.69  | 28.22  |
| Bis(chloromethyl)ether                            | 22.67  | 22.63  |
| Bis(cyclohexyl)amine                              | 56.88  | 56.65  |
| Bis(diallylamino)borane                           | 67.84  | 68.71  |
| Bis(diethyl)disiloxane                            | 58.54  | 58.51  |
| Bis(diethylamino fluoro oxophosphorus) oxide      | 61.78  | 61.66  |
| Bis(diethylamino fluoro thiophosphorus) oxide     | 76.76  | 76.54  |
| Bis(diethylamino)borane                           | 51.54  | 51.43  |
| Bis(diethylmethylsilyl)amine                      | 69.24  | 69.58  |
| Bis(diethylsilyl)amine                            | 61.4   | 61.24  |
| Bis(di-isoamylamino)borane                        | 107.11 | 106.83 |
| Bis(diisobutylamino)borane                        | 88.26  | 88.31  |
| Bis(dimethylamino)bis(diethylamino)silane         | 79.5   | 79.36  |
| Bis(dimethylphenylsilyl)amine                     | 91.08  | 91.06  |
| Bis(ethoxy fluoro oxophosphorus) oxide            | 40.08  | 40.02  |
| Bis(ethyldimethylsilyl)amine                      | 61.01  | 60.44  |
| Bis(ethylisobutyl)disiloxane                      | 76.95  | 76.95  |
| Bis(ethylphenyl)disiloxane                        | 88.84  | 89.13  |
| Bis(ethylthio) butylborane                        | 60.19  | 60.38  |
| Bis(ethylthio) isobutylborane                     | 60.3   | 60.34  |
| Bis(ethylthio) isopropylborane                    | 55.34  | 55.77  |
| Bis(ethylthio) octyl borane                       | 78.77  | 78.9   |
| Bis(ethylthio) propylborane                       | 55.66  | 55.75  |
| Bis(ethylthio)borane                              | 41.16  | 41.75  |
| Bis(fluoro phenoxy oxophosphorus) oxide           | 69.94  | 69.86  |
| Bis(isobutyl) cyclohexylboronate                  | 72.44  | 72.12  |
| Bis(isopropylthio)borane                          | 51.08  | 50.99  |
| Bis(methoxy fluoro oxophosphorus) oxide           | 30.73  | 30.7   |

|                                         |        |        |
|-----------------------------------------|--------|--------|
| Bis(methylthio)methane                  | 31.57  | 31.25  |
| Bis(propylthio)borane                   | 50.77  | 51.01  |
| Bis(t-butylthio)borane                  | 61.77  | 61.01  |
| Bis(trichlorosilyl)methane              | 51.08  | 51.72  |
| Bis(triethylsilyl)amine                 | 78.33  | 78.72  |
| Bis(trihexylsilyl)acetylene             | 193.9  | 193.78 |
| Bis(trimethoxysilyl)amine               | 56.3   | 56.38  |
| Bis(trimethoxysilylamino)dimethylsilane | 77.61  | 77.64  |
| Bis(trimethylsilylamino)dimethylsilane  | 71.81  | 72.56  |
| Bis-N-(2-hydroxyethyl)-2-furfurylamine  | 48.32  | 48.91  |
| Bornyl acetate                          | 55.01  | 55.1   |
| Brassic acid                            | 105.44 | 105.4  |
| Bromal                                  | 35.75  | 35.85  |
| Bromo butylthio isopentylborane         | 64     | 63.96  |
| Bromo ethylthio isopentylborane         | 54.51  | 54.7   |
| Bromo ethylthio isopropylborane         | 45.04  | 45.5   |
| Bromo ethylthio phenylborane            | 57.27  | 56.67  |
| Bromo-2-chlorobenzene                   | 38.93  | 38.93  |
| Bromoacetic acid                        | 20.43  | 20.74  |
| Bromoacetone                            | 23.38  | 24.04  |
| Bromoacetyl bromide                     | 27.6   | 27.55  |
| Bromobenzene                            | 33.95  | 34.11  |
| Bromochloroacetic acid                  | 25.76  | 25.48  |
| Bromocycloheptane                       | 39.79  | 40.2   |
| Bromocyclohexane                        | 35.64  | 35.57  |
| Bromocyclopentane                       | 30.98  | 30.94  |
| Bromoethane                             | 19.04  | 19.14  |
| Bromoethylene                           | 18.8   | 18.63  |
| Bromomethylether                        | 21.27  | 21.98  |
| Bromopentafluorobenzene                 | 33.44  | 33.61  |
| Bromotriethylsilane                     | 46.44  | 46.6   |
| Bromotrimethylsilane                    | 32.92  | 32.89  |
| Butadiyne                               | 17.16  | 16.58  |
| Butanal                                 | 21.05  | 21.18  |
| Butanal oxime                           | 25.06  | 25.17  |
| Butanamide                              | 24.32  | 23.81  |
| Butane                                  | 20.69  | 20.66  |
| Butane-1,2,4-triol                      | 25.04  | 24.9   |
| Butane-2,3-dinitrite                    | 33.22  | 32.88  |
| Butanedial                              | 20.72  | 21.7   |
| Butanedioic acid                        | 24.07  | 23.86  |
| Butanoic acid                           | 22.19  | 22.26  |

|                                                       |        |        |
|-------------------------------------------------------|--------|--------|
| Butanoic anhydride                                    | 40.28  | 40.97  |
| Butanoyl chloride                                     | 25.8   | 26.12  |
| Buthiobate                                            | 116.68 | 116.54 |
| Butoxy chloro phenylborine                            | 56.56  | 56.22  |
| Butoxyacetylene                                       | 29.44  | 29.67  |
| Butoxybenzene                                         | 47     | 46.96  |
| Butoxytrimethylsilane                                 | 44.88  | 44.93  |
| Butyl 1-naphthaleneacetate                            | 73.88  | 74.19  |
| Butyl 1-naphthoate                                    | 69.93  | 69.56  |
| Butyl 1-naphthylketone                                | 68.11  | 68.08  |
| Butyl 2-(2,3-dihydroxypropoxy)ethyl thioether         | 56.14  | 56.25  |
| Butyl 2-hydroxybenzoate                               | 54.28  | 53.37  |
| Butyl 2-methylbutyrate                                | 45.82  | 45.52  |
| Butyl 2-naphthaleneacetate                            | 74.23  | 74.19  |
| Butyl 2-thiophenecarboxylate                          | 50.59  | 50.07  |
| Butyl 4-methylpentoxy dithiophosphinic acid           | 74.51  | 74.46  |
| Butyl 4-oxopentanoate                                 | 45.62  | 45.83  |
| Butyl 4-toluenesulfonate                              | 59.83  | 59.79  |
| Butyl butanoate                                       | 40.85  | 40.93  |
| Butyl butoxy chloroborine                             | 49.43  | 49.66  |
| Butyl butylxanthate                                   | 62.07  | 61.93  |
| Butyl caproate                                        | 49.88  | 50.19  |
| Butyl chlorofluorophosphate                           | 33.88  | 34.62  |
| Butyl chloroformate                                   | 31.6   | 32.06  |
| Butyl cyanoacetate                                    | 35.69  | 36.09  |
| Butyl cyclohexyloxy dithiophosphinic acid             | 72.37  | 72.37  |
| Butyl dibutoxyborine                                  | 64.87  | 65.06  |
| Butyl dichloro phosphorus thioxide                    | 47.2   | 47.21  |
| Butyl diethyl phosphine oxide                         | 47.72  | 47.7   |
| Butyl enanthate                                       | 54.62  | 54.82  |
| Butyl ethoxy dithiophosphinic acid                    | 55.92  | 55.98  |
| Butyl ethoxyethoxy dithiophosphinic acid              | 67.15  | 66.93  |
| Butyl ethoxyethoxy S-(2-cyanoethyl) dithiophosphinate | 79.87  | 80.21  |
| Butyl ethyl carbonate                                 | 37.67  | 37.76  |
| Butyl ethyl sulfide                                   | 37.88  | 37.84  |
| Butyl ethylxanthate                                   | 52.68  | 52.67  |
| Butyl fluorophosphoric acid                           | 31.18  | 30.81  |
| Butyl hydrocinnamate                                  | 60.48  | 60.86  |
| Butyl hydroperoxide                                   | 24.24  | 24.4   |
| Butyl isocyanate                                      | 27.67  | 27.74  |
| Butyl isopropoxy dithiophosphinic acid                | 60.27  | 60.62  |

|                                               |        |        |
|-----------------------------------------------|--------|--------|
| Butyl methoxy dithiophosphinic acid           | 51.54  | 51.32  |
| Butyl N,N-diethylamino phosphorusoxy chloride | 55.5   | 55.47  |
| Butyl N,N-diethylamino phosphorusoxy fluoride | 49.15  | 49.51  |
| Butyl octanoate                               | 59.15  | 59.45  |
| Butyl pentanoate                              | 45.28  | 45.56  |
| Butyl perfluorooctanoate                      | 61.65  | 62.01  |
| Butyl phenyl sulfide                          | 53.59  | 53.53  |
| Butyl phenylacetate                           | 55.89  | 56.23  |
| Butyl phosphorusoxy dichloride                | 38.87  | 38.9   |
| Butyl propanoate                              | 36.16  | 36.3   |
| Butyl propyl carbonate                        | 42.3   | 42.39  |
| Butyl ricinoleate                             | 106.53 | 106.97 |
| Butyl thiocyanate                             | 33.07  | 33.16  |
| Butyl trifluoroacetate                        | 31.95  | 31.95  |
| Butyl vinyl ether                             | 30.96  | 30.91  |
| Butylacetamide                                | 33.8   | 33.31  |
| Butylammonium nitrate                         | 33.34  | 33.37  |
| Butylbenzene                                  | 45.1   | 45.22  |
| Butylcellosolve                               | 33.31  | 33.02  |
| Butylcyclohexane                              | 46.86  | 46.26  |
| Butylcyclopentane                             | 41.7   | 41.63  |
| Butyl di(3-acetoxypentyl)phosphine            | 80.58  | 80.99  |
| Butyl di(3-acetoxypentyl)phosphine thioxide   | 87.18  | 87.31  |
| Butyl di(3-aminopentyl)phosphine              | 65.75  | 65.83  |
| Butyl di(3-aminopentyl)phosphine thioxide     | 72.37  | 72.15  |
| Butyl di(3-cyanopentyl)phosphine              | 67.58  | 67.81  |
| Butyl di(3-hydroxypentyl)phosphine            | 61.75  | 61.79  |
| Butyl di(3-hydroxypentyl)phosphine thioxide   | 67.99  | 68.11  |
| Butyl dichlorophosphine                       | 39.16  | 39.85  |
| Butyl dimethylamine                           | 33.82  | 33.82  |
| Butyl ethylamine                              | 33.45  | 33.29  |
| Butyl iodoacetylene                           | 40.34  | 40.63  |
| Butyl isopropylether                          | 36.03  | 36.25  |
| Butyl isothiocyanate                          | 35.55  | 35.3   |
| Butyl methylketone                            | 29.98  | 30.19  |
| Butyl nitrate                                 | 28.32  | 28.28  |
| Butyl phenylboronic acid                      | 50.06  | 50.81  |
| Butyl phosphonyl difluoride                   | 28.4   | 28.32  |
| Butyl silane                                  | 30.9   | 31.04  |
| Butyl sulfinyl chloride                       | 35.15  | 35.01  |
| Butyl thiodiethylborane                       | 52.2   | 52.2   |
| Butyl trichlorosilane                         | 43.18  | 43.27  |

|                                         |       |        |
|-----------------------------------------|-------|--------|
| Butyltriisothiocyanatosilane            | 73.92 | 73.73  |
| Butyric acid methylester                | 26.81 | 27.01  |
| Butyrolin                               | 41.28 | 40.87  |
| Butyronitrile                           | 20.37 | 20.45  |
| Butyrophenone                           | 45.63 | 45.49  |
| Camphene                                | 43.5  | 43.82  |
| Camphor                                 | 44.39 | 44.35  |
| Capraldehyde                            | 48.51 | 48.96  |
| Caproic aldehyde                        | 29.38 | 30.44  |
| Caprolactone                            | 29.11 | 29.53  |
| Caproleic acid                          | 49.59 | 49.73  |
| Caprylene                               | 38.78 | 38.87  |
| Caprylic aldehyde                       | 39.66 | 39.7   |
| Caprylonitrile                          | 38.97 | 38.97  |
| Carbitol                                | 35.06 | 34.71  |
| Carbitol acetate                        | 44.29 | 44.31  |
| Carbon suboxide                         | 16.53 | 16.58  |
| Carbonyl dicyanide                      | 16.95 | 15.88  |
| Carvacrylmethylketone                   | 55.88 | 55.07  |
| Carvenone                               | 46.6  | 46.36  |
| Carvone                                 | 45.69 | 46.16  |
| Cedrene                                 | 64.49 | 64.88  |
| Cedrol                                  | 66.93 | 66.37  |
| Cetane                                  | 76.09 | 76.22  |
| Cetene                                  | 75.9  | 75.91  |
| Cetyl palmitate                         | 152.5 | 152.05 |
| Chloral                                 | 26.6  | 26.64  |
| Chlordimeform                           | 57.07 | 56.68  |
| Chloro 2-octoxy phenylborine            | 74.42 | 74.75  |
| Chloro di(1,2,2-trimethylpropoxy)borine | 69.31 | 69.36  |
| Chloro di(2-octoxy)borine               | 87.34 | 87.92  |
| Chloro di(sec-butoxy)borine             | 50.69 | 50.88  |
| Chloro dibutoxyborine                   | 51.03 | 50.86  |
| Chloro diisobutoxyborine                | 50.35 | 50.78  |
| Chloro dineopentoxyborine               | 60.34 | 60.08  |
| Chloro dioctoxyborine                   | 88.29 | 87.9   |
| Chloro dipropoxyborine                  | 41.83 | 41.6   |
| Chloro(chloromethyl)dimethylsilane      | 34.43 | 34.5   |
| Chloro(dichloromethyl)dimethylsilane    | 39.39 | 39.44  |
| Chloro(methylthio)methane               | 24.48 | 23.93  |
| Chloro-2,3-dinitrobenzene               | 45.36 | 44.68  |
| Chloroacetic acid                       | 17.56 | 17.8   |



|                                                                |       |       |
|----------------------------------------------------------------|-------|-------|
| Chloroacetic acid ethylester                                   | 26.85 | 27.21 |
| Chloroacetone                                                  | 21.46 | 21.1  |
| Chloroacetone cyanohydrin                                      | 26.9  | 26.61 |
| Chloroacetonitrile                                             | 16.02 | 15.99 |
| Chloroacetyl chloride                                          | 21.5  | 21.66 |
| Chloroacetylene                                                | 15.31 | 14.78 |
| Chlorobenzene                                                  | 31.15 | 31.34 |
| Chlorocyclohexane                                              | 32.64 | 32.54 |
| Chlorocyclopentane                                             | 28.02 | 27.91 |
| Chlorodiethylsilane                                            | 34.92 | 34.7  |
| Chlorodimethylphenylsilane                                     | 49.33 | 49.7  |
| Chlorodimethylsilane                                           | 25.9  | 25.56 |
| Chloroethane                                                   | 16.3  | 16.2  |
| Chloroethyldimethylsilane                                      | 35.15 | 34.39 |
| Chloroethylene                                                 | 15.52 | 15.78 |
| Chloroethylene carbonate                                       | 22.06 | 22.02 |
| Chloromethyl methyl ether                                      | 18.28 | 17.83 |
| Chloromethylacetate                                            | 22.47 | 22.55 |
| Chloromethylchloroformate                                      | 22.6  | 22.94 |
| Chloromethylphenylsilane                                       | 45.46 | 45.44 |
| Chloromethylsulfonyl fluoride                                  | 20.65 | 21.21 |
| Chloroprene                                                    | 25.28 | 24.96 |
| Chloropropham                                                  | 56.71 | 56.08 |
| Chlorotriethylsilane                                           | 43.54 | 43.53 |
| Chlorotrimethylsilane                                          | 29.88 | 29.82 |
| Chlorovinyl dimethylsilane                                     | 34.49 | 34.01 |
| Chlorthion                                                     | 67.58 | 66.67 |
| cis- Cyclooctene                                               | 36.28 | 36.84 |
| cis-(1-Methyl-1-propenyl)benzene                               | 45.14 | 45.09 |
| cis,trans,trans-1,5,9-Cyclododecatriene                        | 54.26 | 54.96 |
| cis-1,2,3,5,6,8a-Hexahydro-4,7-dimethyl-1-isopropylnaphthalene | 66.6  | 67    |
| cis-1,2-Bis(trimethylsilyl)-3,3-dichlorocyclopropane           | 71.37 | 70.62 |
| cis-1,2-Dibromoethylene                                        | 25.63 | 26.28 |
| cis-1,2-Dichlorocyclohexane                                    | 37.24 | 37.3  |
| cis-1,2-Dichloroethylene                                       | 20.26 | 20.58 |
| cis-1,2-Dimethylcyclohexane                                    | 36.85 | 36.96 |
| cis-1,2-Dimethylcyclopentane                                   | 32.5  | 32.33 |
| cis-1,2-Dimethylcyclopropane                                   | 23.74 | 23.07 |
| cis-1,2-Dis(trimethylsilyl)-ethylene                           | 57.88 | 58.06 |
| cis-1,2-Divinylcyclobutane                                     | 36.73 | 36.34 |
| cis-1,3-Dichloro-2-butene                                      | 30.24 | 30.18 |

|                                            |       |       |
|--------------------------------------------|-------|-------|
| cis-1,3-Dichloropropene                    | 25.21 | 25.44 |
| cis-1,3-Dimethylcyclohexane                | 37.3  | 36.96 |
| cis-1,3-Dimethylcyclopentane               | 32.79 | 32.33 |
| cis-1,3-Pentadiene                         | 25.79 | 24.78 |
| cis-1,4-Dichloro-2-butene                  | 30.35 | 30.06 |
| cis-1,4-Dimethylcyclohexane                | 36.5  | 36.96 |
| cis-1,4-Hexadiene                          | 28.96 | 29.41 |
| cis-1-Bromo-1-butene                       | 27.54 | 28    |
| cis-1-Bromopropene                         | 23.01 | 23.37 |
| cis-1-Chloro-1-butene                      | 24.82 | 25.15 |
| cis-1-Chloropropene                        | 20.09 | 20.52 |
| cis-1-Ethyl-2-methylcyclopentane           | 36.87 | 36.96 |
| cis-1-Ethyl-3-methylcyclopentane           | 36.79 | 36.96 |
| cis-1-Methyl-2-propylcyclopentane          | 41.74 | 41.59 |
| cis-1-Methyl-4-isopropylcyclohexane        | 46.27 | 46.18 |
| cis-1-Phenyl-1-propene                     | 40.93 | 40.39 |
| cis-2,2,5,5-Tetramethyl-3-hexene           | 48.41 | 48.2  |
| cis-2,2-Dimethyl-3-hexene                  | 39.23 | 38.96 |
| cis-2,3-Epoxybutane                        | 20.31 | 20.23 |
| cis-2,4,6-Trimethyl-1,3,5-trioxane         | 32.57 | 32.37 |
| cis-2-Bromo-2-butene                       | 27.72 | 27.87 |
| cis-2-Butene-1,4-diol                      | 23.32 | 23.28 |
| cis-2-Chloro-2-butene                      | 25.01 | 25.38 |
| cis-2-Heptene                              | 34.07 | 34.35 |
| cis-2-Hexen-1-ol                           | 31.14 | 31.13 |
| cis-2-Hexene                               | 29.76 | 29.72 |
| cis-2-Methoxy-4-(1-propenyl)phenol         | 49.9  | 48.68 |
| cis-2-Methyl-1,3-pentadiene                | 30.68 | 29.48 |
| cis-2-Methyl-3-hexene                      | 34.57 | 34.31 |
| cis-2-Methylcyclohexanol                   | 33.66 | 33.79 |
| cis-2-Methylcyclopentanol                  | 28.72 | 29.16 |
| cis-2-Octene                               | 38.8  | 38.98 |
| cis-2-Penten-1-ol                          | 26.37 | 26.5  |
| cis-2-Pentene                              | 24.95 | 25.09 |
| cis-3,3,5-Trimethylcyclohexanol            | 42.85 | 43.03 |
| cis-3,4-Dimethyl-2-pentene                 | 34.33 | 34.38 |
| cis-3,7-Dimethyl-2,6-octadien-1-ol acetate | 58.51 | 59.19 |
| cis-3-Heptene                              | 34.3  | 34.35 |
| cis-3-Hexen-1-ol                           | 31.01 | 31.13 |
| cis-3-Hexenal                              | 29.71 | 30.24 |
| cis-3-Hexene                               | 29.75 | 29.72 |
| cis-3-Methyl-2-heptene                     | 39.09 | 39.05 |

|                                      |        |        |
|--------------------------------------|--------|--------|
| cis-3-Methyl-2-hexene                | 34.36  | 34.42  |
| cis-3-Methyl-3-hexene                | 34.56  | 34.42  |
| cis-3-Methylcyclohexanol             | 33.85  | 33.79  |
| cis-3-Octene                         | 39.13  | 38.98  |
| cis-3-Penten-1-yne                   | 23.72  | 23.05  |
| cis-3-Phenyl-2-propen-1-ol           | 42.89  | 41.8   |
| cis-4,4-Dimethyl-2-pentene           | 34.44  | 34.33  |
| cis-4-Methyl-2-hexene                | 34.44  | 34.31  |
| cis-4-Methylcyclohexanol             | 33.89  | 33.79  |
| cis-4-Octene                         | 38.95  | 38.98  |
| cis-4-Undecene                       | 52.88  | 52.87  |
| cis-5-Decene                         | 48.26  | 48.24  |
| cis-5-Methyl-2-hexene                | 34.45  | 34.31  |
| cis-5-Undecene                       | 52.91  | 52.87  |
| cis-9-Octadecenitrile                | 84.65  | 85.07  |
| cis-alpha-Bisabolene                 | 67.89  | 68.91  |
| cis-Benzaldehyde oxime               | 36.83  | 35.84  |
| cis-Chlorobromoethylene              | 23.18  | 23.43  |
| cis-Crotyl alcohol                   | 21.69  | 21.87  |
| cis-Cyclohexyl-1,2-diamine           | 34.74  | 34.5   |
| cis-Decalin                          | 43.89  | 44.08  |
| cis-Nerolidol                        | 73.22  | 72.38  |
| cis-Tetrahydro-2,5-dimethylthiophene | 35.8   | 35.68  |
| cis-Verbenol                         | 45.64  | 45.35  |
| Citronellal                          | 48.35  | 48.79  |
| Citronellene                         | 47.58  | 47.96  |
| Colamine                             | 16.25  | 16.24  |
| Coprostane                           | 118.27 | 118.27 |
| Crotonaldehyde                       | 21.55  | 20.98  |
| Crotonic acid                        | 22.92  | 22.06  |
| Crotonic acid anhydride              | 41.71  | 40.57  |
| Cumene                               | 40.32  | 40.55  |
| Cumic alcohol                        | 46.59  | 46.77  |
| Cumylamine                           | 43.49  | 43.95  |
| Cuscohygrine                         | 65.85  | 65.9   |
| Cyanamide                            | 8.67   | 9.32   |
| Cyanoacetylene                       | 14.71  | 13.78  |
| Cyanoethylene                        | 15.75  | 15.51  |
| Cyanogen                             | 11.3   | 10.98  |
| Cyclobutane                          | 18.25  | 18.52  |
| Cyclobutanecarboxylic acid           | 24.9   | 24.71  |
| Cyclobutanol                         | 20.5   | 19.94  |

|                              |       |       |
|------------------------------|-------|-------|
| Cyclobutanone                | 18.64 | 18.79 |
| Cyclobutylamine              | 22.34 | 21.88 |
| Cyclobutylphenylketone       | 48.6  | 47.94 |
| Cyclodecane                  | 45.97 | 46.3  |
| Cyclodecanol                 | 47.25 | 47.72 |
| Cyclodecanone                | 45.44 | 46.57 |
| Cyclododecanone              | 54.82 | 55.83 |
| Cyclogeraniolane             | 42.51 | 41.61 |
| Cycloheptane                 | 32.18 | 32.41 |
| Cycloheptanol                | 33.65 | 33.83 |
| Cycloheptene                 | 31.73 | 32.21 |
| Cyclohexane                  | 27.72 | 27.78 |
| Cyclohexanecarbonitrile      | 31.96 | 32.16 |
| Cyclohexanecarbonyl chloride | 37.39 | 37.83 |
| Cyclohexanecarboxaldehyde    | 33.34 | 32.89 |
| Cyclohexanecarboxylic acid   | 33.52 | 33.97 |
| Cyclohexaneethanol           | 38.34 | 38.41 |
| Cyclohexanemethanamine       | 35.84 | 35.8  |
| Cyclohexanemethanol          | 33.92 | 33.78 |
| Cyclohexanethiol             | 35.66 | 35.44 |
| Cyclohexanol                 | 29.16 | 29.2  |
| Cyclohexanone                | 27.87 | 28.05 |
| Cyclohexene                  | 27.04 | 27.58 |
| Cyclohexyl acetate           | 38.87 | 38.8  |
| Cyclohexyl acrylate          | 43.7  | 43.12 |
| Cyclohexyl benzoate          | 59.55 | 58.73 |
| Cyclohexyl formate           | 33.79 | 34.3  |
| Cyclohexyl iodide            | 41.05 | 40.99 |
| Cyclohexyl isothiocyanate    | 42.69 | 42.35 |
| Cyclohexyl methacrylate      | 47.67 | 47.82 |
| Cyclohexyl propanoate        | 44.02 | 43.43 |
| Cyclohexyl thiocyanate       | 40.3  | 40.27 |
| Cyclohexylacetic acid        | 38.58 | 38.6  |
| Cyclohexylamine              | 31.31 | 31.14 |
| Cyclohexyldichloroborane     | 41.98 | 41.91 |
| Cyclohexylhydroperoxide      | 31.49 | 31.53 |
| Cyclohexylideneacetonitrile  | 36.51 | 36.7  |
| Cyclohexylisocyanate         | 34.66 | 34.79 |
| Cyclohexylisopropylamine     | 44.02 | 44.9  |
| Cyclohexyloxytrimethylsilane | 52.12 | 52.06 |
| Cyclohexylphosphine          | 38.11 | 37.84 |
| Cyclohexyltrifluorosilane    | 34.26 | 34.35 |

|                              |       |       |
|------------------------------|-------|-------|
| Cyclononane                  | 41.36 | 41.67 |
| Cyclononanone                | 41.14 | 41.94 |
| Cyclooctane                  | 36.72 | 37.04 |
| Cyclooctanol                 | 37.87 | 38.46 |
| Cyclooctanone                | 36.71 | 37.31 |
| Cyclooctatetraene            | 35.39 | 36.24 |
| Cyclooctyne                  | 35.72 | 35.54 |
| Cyclopentadecane             | 68.8  | 69.45 |
| Cyclopentadecanone           | 69.57 | 69.72 |
| Cyclopentadiene              | 21.89 | 22.75 |
| Cyclopentane                 | 23.13 | 23.15 |
| Cyclopentanecarbonitrile     | 27.55 | 27.53 |
| Cyclopentanecarboxaldehyde   | 27.78 | 28.26 |
| Cyclopentanecarboxylic acid  | 29.32 | 29.34 |
| Cyclopentanemethanol         | 29.28 | 29.15 |
| Cyclopentanepropanoic acid   | 38.34 | 38.6  |
| Cyclopentanol                | 24.54 | 24.57 |
| Cyclopentanone               | 23.21 | 23.42 |
| Cyclopentene                 | 22.45 | 22.95 |
| Cyclopentyl acetate          | 34.07 | 34.17 |
| Cyclopentyl formate          | 29.53 | 29.67 |
| Cyclopentyl methyl ether     | 29.42 | 29.45 |
| Cyclopentylacetic acid       | 33.87 | 33.97 |
| Cyclopentylamine             | 27.48 | 26.51 |
| Cyclopentylbenzene           | 47.59 | 47.67 |
| Cyclopentylphosphine         | 33.47 | 33.21 |
| Cyclopropanecarbonitrile     | 19.09 | 18.27 |
| Cyclopropanecarboxaldehyde   | 19.3  | 19    |
| Cyclopropanecarboxylic acid  | 20.8  | 20.08 |
| Cyclopropyl methyl ether     | 20.63 | 20.19 |
| Cyclopropylamine             | 17.57 | 17.25 |
| Cyclopropylbenzene           | 39.09 | 38.41 |
| Cyclopropylcyclohexane       | 40.35 | 39.45 |
| Cytosine                     | 25.98 | 26.2  |
| DBCP                         | 36.14 | 36.36 |
| Decahydro-2-naphthol         | 45.49 | 45.5  |
| Decamethylcyclopentasiloxane | 93.33 | 93.25 |
| Decamethyltetrasiloxane      | 86.18 | 86.25 |
| Decane                       | 48.41 | 48.44 |
| Decanedioic acid             | 51.5  | 51.64 |
| Decanedioyl dichloride       | 59.34 | 59.36 |
| Decanenitrile                | 48.25 | 48.23 |

|                                  |        |        |
|----------------------------------|--------|--------|
| Decanoyl chloride                | 54.8   | 53.9   |
| Decyl decanoate                  | 96.37  | 96.49  |
| Decyl thiocyanate                | 60.94  | 60.94  |
| Decyl vinyl ether                | 59.19  | 58.69  |
| Decylbenzene                     | 72.93  | 73     |
| Decylcyclohexane                 | 74.16  | 74.04  |
| Decylcyclopentane                | 69.47  | 69.41  |
| Decyldiphenylnonylsilane         | 148.69 | 148.68 |
| Decyldiphenylsilane              | 106.74 | 107.04 |
| Decyloxytrimethylsilane          | 72.71  | 72.71  |
| DEET                             | 58.5   | 58.42  |
| DEHP                             | 113.78 | 113.64 |
| Demanyl phosphate                | 35.98  | 36.37  |
| Di(2-chloroethyl) chloromaleate  | 57.52  | 57     |
| Di(2-ethylhexyl) fumarate        | 98.68  | 97.96  |
| Di(2-ethylhexyl) maleate         | 97.86  | 97.96  |
| Di(cyclohexyloxy)dimethylsilane  | 74.01  | 73.82  |
| Di-2-propenoyldiethyleneglycol   | 52.76  | 53.01  |
| Di-3-tolylphosphorous aziridide  | 83.57  | 83.41  |
| Di-3-tolylthiophosphoric aziride | 89.11  | 88.98  |
| Di-4-tolylphosphorous aziridide  | 83.65  | 83.41  |
| Di-4-tolylthiophosphoric aziride | 89.38  | 88.98  |
| Diacetoxymethane                 | 28.35  | 28.57  |
| Diacetyethylamine                | 34.48  | 33.56  |
| Diallyl fumarate                 | 50.56  | 51.12  |
| Diallyl maleate                  | 50.91  | 51.12  |
| Diallyl oxalate                  | 42.09  | 42.06  |
| Diallyl succinate                | 50.85  | 51.32  |
| Diallylamine                     | 32.25  | 32.67  |
| Diallyldimethylsilane            | 48.34  | 48.11  |
| Diallylsulfoxide                 | 38.05  | 38.1   |
| Diamyl isophthalate              | 86.19  | 85.94  |
| Diamyl terephthalate             | 86.46  | 85.94  |
| Diamylamine                      | 51.99  | 51.81  |
| Diamylsilane                     | 58.6   | 58.56  |
| Dibenzosuberone                  | 63.88  | 63.64  |
| Dibenzyl ether                   | 62.2   | 62.21  |
| Dibenzyl malonate                | 79.02  | 77.91  |
| Dibenzylamine                    | 63.48  | 63.89  |
| Dibromoacetonitrile              | 26.31  | 26.47  |
| Dibutoxy 2-hydroxyethoxy borine  | 59.48  | 58.68  |
| Dibutoxy butyl phosphorus        | 69.66  | 69.2   |

|                                     |        |        |
|-------------------------------------|--------|--------|
| Dibutoxymethane                     | 47.33  | 46.97  |
| Dibutoxyphosphinylsulfenyl chloride | 63.32  | 63.3   |
| Dibutoxythiophosphonate             | 56.39  | 57.01  |
| Dibutyl 3-oxo-2-butyl phosphate     | 70.71  | 70.11  |
| Dibutyl adipate                     | 70.4   | 70.46  |
| Dibutyl azodicarboxylate            | 57.88  | 58.26  |
| Dibutyl butanephosphonate           | 68.37  | 68.23  |
| Dibutyl butylamino thiophosphate    | 79.03  | 79.14  |
| Dibutyl carbonate                   | 46.84  | 47.02  |
| Dibutyl chloromaleate               | 66.38  | 65.92  |
| Dibutyl decanedioate                | 88.7   | 88.98  |
| Dibutyl decanephosphonate           | 95.52  | 96.01  |
| Dibutyl dodecanephosphonate         | 105.05 | 105.27 |
| Dibutyl ether                       | 41.01  | 40.87  |
| Dibutyl ethylphosphonate            | 58.98  | 58.97  |
| Dibutyl fumarate                    | 61.9   | 61     |
| Dibutyl heptanephosphonate          | 82.01  | 82.12  |
| Dibutyl hexadecanephosphonate       | 123.32 | 123.79 |
| Dibutyl hexanephosphonate           | 77.28  | 77.49  |
| Dibutyl isophthalate                | 77.05  | 76.68  |
| Dibutyl maleate                     | 60.99  | 61     |
| Dibutyl malonate                    | 56.43  | 56.57  |
| Dibutyl nonanephosphonate           | 91.11  | 91.38  |
| Dibutyl O-butyl phosphorus oxide    | 67.23  | 67.6   |
| Dibutyl octadecanephosphonate       | 132.81 | 133.05 |
| Dibutyl octanephosphonate           | 86.68  | 86.75  |
| Dibutyl oxalate                     | 52.21  | 51.94  |
| Dibutyl pentanephosphonate          | 72.69  | 72.86  |
| Dibutyl phosphite                   | 50.1   | 50.4   |
| Dibutyl phthalate                   | 77.05  | 76.68  |
| Dibutyl suberate                    | 79.43  | 79.72  |
| Dibutyl succinate                   | 60.99  | 61.2   |
| Dibutyl tartrate                    | 64.01  | 64.04  |
| Dibutyl terephthalate               | 77.33  | 76.68  |
| Dibutyl tetradecanephosphonate      | 114.28 | 114.53 |
| Dibutyl thiophosphoryl chloride     | 62.81  | 62.5   |
| Dibutylacetamide                    | 52.12  | 52.2   |
| Dibutylamine                        | 42.44  | 42.55  |
| Dibutylboronic anhydride            | 86.44  | 87.19  |
| Dibutylbutylaminoborane             | 65.68  | 65.39  |
| Dibutyldiisothiocyanatosilane       | 77.77  | 77.84  |
| Dibutyldinonylsilane                | 131.54 | 131.95 |

|                                      |        |        |
|--------------------------------------|--------|--------|
| Dibutyl disulfide                    | 55.17  | 55.3   |
| Dibutylethylthioborane               | 61.49  | 61.46  |
| Dibutylmethylsilyl bromide           | 60.64  | 60.55  |
| Dibutyl nonylsilane                  | 90.16  | 90.31  |
| Dibutylphenylaminoborane             | 72.53  | 72.57  |
| Dibutylphenylthioborane              | 76.46  | 76.82  |
| Dibutylphosphine                     | 49.17  | 49.36  |
| Dibutylphosphinic chloride           | 48.82  | 48.78  |
| Dibutylsilane                        | 49.39  | 49.3   |
| Dibutylsulfide                       | 47.15  | 47.1   |
| Dibutyltrisulfide                    | 64.05  | 64.17  |
| Dichloro 4-chlorobutoxyborine        | 40.73  | 40.65  |
| Dichloro butoxyborine                | 36.03  | 35.85  |
| Dichloro isobutoxyborine             | 36.55  | 35.81  |
| Dichloro neopentoxyborine            | 40.51  | 40.46  |
| Dichloro octoxyborine                | 53.85  | 54.37  |
| Dichloro propoxyborine               | 30.62  | 31.22  |
| Dichloro(chloromethyl)methylsilane   | 34.17  | 34.29  |
| Dichloro(dichloromethyl)methylsilane | 39.13  | 39.23  |
| Dichloroacetic acid                  | 22.83  | 22.66  |
| Dichloroacetonitrile                 | 21.13  | 20.85  |
| Dichloroacetyl chloride              | 26.31  | 26.52  |
| Dichlorodiethylsilane                | 38.71  | 38.75  |
| Dichlorodimethylsilane               | 29.65  | 29.61  |
| Dichlorodiphenylsilane               | 69.99  | 69.37  |
| Dichloromethylphenylsilane           | 48.81  | 49.49  |
| Dichloromethylphosphine              | 26.1   | 26.09  |
| Dichlorophenylphosphine              | 45.34  | 45.36  |
| Dicosamethyldecasiloxane             | 197.51 | 198.15 |
| Dicyanomethane                       | 15.7   | 15.61  |
| Dicyclohexyl ether                   | 55.54  | 55.13  |
| Dicyclopropyl ketone                 | 31.29  | 30.46  |
| Didecyl isophthalate                 | 132.73 | 132.24 |
| Didecyldiphenylsilane                | 153.4  | 153.31 |
| Diethanolamine                       | 27.12  | 26.85  |
| Diethoxy butyl phosphorus            | 51.45  | 50.68  |
| Diethoxy ethyl phosphorus            | 42.12  | 41.42  |
| Diethoxy fluorophosphate             | 30.94  | 31.26  |
| Diethoxy propyl phosphorus           | 46.74  | 46.05  |
| Diethoxydimethylsilane               | 40.99  | 41.04  |
| Diethoxydiphenylsilane               | 81.07  | 80.8   |
| Diethoxymethylphenylsilane           | 60.85  | 60.92  |



|                                                 |       |       |
|-------------------------------------------------|-------|-------|
| Diethoxymethylsilane                            | 36.84 | 36.68 |
| Diethoxyphosphinylsulfenyl chloride             | 44.83 | 44.78 |
| Diethyl 1,1-cyclobutanedicarboxylate            | 49.77 | 49.78 |
| Diethyl 1-azepanyl thiophosphate                | 67.7  | 68.04 |
| Diethyl 2,2-diethylhydrazinosilane              | 55.43 | 55.86 |
| Diethyl 2,2-dimethylhydrazinosilane             | 46.39 | 46.68 |
| Diethyl 2-acetylsuccinate                       | 52.16 | 52.17 |
| Diethyl 2-aminomalonate                         | 41.58 | 41.41 |
| Diethyl 2-butylmalonate                         | 56.64 | 56.53 |
| Diethyl 2-methoxycarbonyl ethyl phosphine oxide | 49.41 | 49.42 |
| Diethyl 3-oxo-2-butyl phosphate                 | 51.21 | 51.59 |
| Diethyl adipate                                 | 51.56 | 51.94 |
| Diethyl allylmalonate                           | 51.28 | 51.59 |
| Diethyl azelate                                 | 65.54 | 65.83 |
| Diethyl azodicarboxylate                        | 39.75 | 39.74 |
| Diethyl benzylmalonate                          | 66.93 | 67.2  |
| Diethyl bis(2,2-diethylhydrazino)silane         | 81.18 | 80.88 |
| Diethyl bis(2,2-dimethylhydrazino)silane        | 62.47 | 62.52 |
| Diethyl bromomalonate                           | 46    | 45.84 |
| Diethyl butoxy phosphorus                       | 50.3  | 50.27 |
| Diethyl butylamino thiophosphate                | 60.47 | 60.62 |
| Diethyl cellosolve                              | 33.53 | 33.3  |
| Diethyl chloromalonate                          | 41.99 | 42.81 |
| Diethyl cyclopropane-1,1-dicarboxylate          | 46.01 | 45.15 |
| Diethyl decanedioate                            | 70.26 | 70.46 |
| Diethyl decoxy phosphorus                       | 78.07 | 78.05 |
| Diethyl dibutylmalonate                         | 75.02 | 75.07 |
| Diethyl dicarbonate                             | 34.79 | 34.63 |
| Diethyl diethylaminosilane                      | 52.34 | 52.06 |
| Diethyl disulfide                               | 36.65 | 36.78 |
| Diethyl ethoxy phosphorus                       | 41.02 | 41.01 |
| Diethyl ethoxycarbonylmethyl phosphorus oxide   | 49.39 | 49.45 |
| Diethyl ethylidenemalonate                      | 46.31 | 47.18 |
| Diethyl ethylmalonate                           | 47.01 | 47.27 |
| Diethyl ethylphenylmalonate                     | 71.3  | 71.85 |
| Diethyl ethylphosphonate                        | 40.67 | 40.45 |
| Diethyl fumarate                                | 43.52 | 42.48 |
| Diethyl glutaconate                             | 46.86 | 47.11 |
| Diethyl glutarate                               | 47.01 | 47.31 |
| Diethyl heptoxy phosphorus                      | 64.17 | 64.16 |
| Diethyl hexoxy phosphorus                       | 59.53 | 59.53 |
| Diethyl isobutoxy phosphorus                    | 50.52 | 50.23 |

|                                        |       |       |
|----------------------------------------|-------|-------|
| Diethyl isobutylmalonate               | 56.25 | 56.49 |
| Diethyl isophthalate                   | 58.95 | 58.16 |
| Diethyl isopropoxy phosphorus          | 45.78 | 45.65 |
| Diethyl isopropylidenemalonate         | 52.19 | 51.88 |
| Diethyl isopropylmalonate              | 51.25 | 51.86 |
| Diethyl itaconate                      | 46.67 | 47.07 |
| Diethyl ketomalonate                   | 39.48 | 38.32 |
| Diethyl malate                         | 43.93 | 44.1  |
| Diethyl maleate                        | 42.7  | 42.48 |
| Diethyl malonate                       | 37.93 | 38.05 |
| Diethyl methylmalonate                 | 42.45 | 42.64 |
| Diethyl methylphosphonate              | 36.23 | 35.95 |
| Diethyl methylsuccinate                | 46.97 | 47.27 |
| Diethyl N,N-diethylamino phosphate     | 52.96 | 52.78 |
| Diethyl nonoxy phosphorus              | 73.09 | 73.42 |
| Diethyl octoxy phosphorus              | 68.65 | 68.79 |
| Diethyl O-ethyl phosphorus oxide       | 39.44 | 39.82 |
| Diethyl oxalate                        | 33.58 | 33.42 |
| Diethyl phenylmalonate                 | 63.22 | 62.57 |
| Diethyl phosphite                      | 31.93 | 31.88 |
| Diethyl phthalate                      | 58.2  | 58.16 |
| Diethyl propoxy phosphorus             | 45.5  | 45.64 |
| Diethyl propylmalonate                 | 51.72 | 51.9  |
| Diethyl succinate                      | 42.39 | 42.68 |
| Diethyl sulfate                        | 31.81 | 31.83 |
| Diethyl sulfite                        | 32.52 | 31.97 |
| Diethyl sulphide                       | 28.59 | 28.58 |
| Diethyl tartrate                       | 45.45 | 45.52 |
| Diethyl terephthalate                  | 58.69 | 58.16 |
| Diethyl thiodipropionate               | 58.76 | 59.86 |
| Diethyl thiophosphoryl chloride        | 43.69 | 43.98 |
| Diethyl xanthate                       | 43.25 | 43.41 |
| Diethylacetaldehyde                    | 30.11 | 30.4  |
| Diethylacetamide                       | 33.08 | 33.68 |
| Diethylamine                           | 24.37 | 24.03 |
| Diethylamino ethyl fluorophosphate     | 41.92 | 42.08 |
| Diethylamino ethyl fluorothiophosphate | 49.06 | 49.52 |
| Diethylaminoacetone                    | 38.32 | 38.64 |
| Diethylbutylthiophosphine              | 62.25 | 62.59 |
| Diethylcarbonate                       | 28.53 | 28.5  |
| Diethylcyanamide                       | 28.63 | 28.45 |
| Diethyldifluorosilane                  | 27.74 | 27.83 |

|                                        |       |        |
|----------------------------------------|-------|--------|
| Diethyldiisothiocyanatosilane          | 59.55 | 59.32  |
| Diethylene glycol dimethyl ether       | 35.22 | 34.93  |
| Diethyleneglycol                       | 25.33 | 25.17  |
| Diethyleneglycol bischloroformate      | 45.03 | 45.15  |
| Diethyleneglycol diacetate             | 44.82 | 44.37  |
| Diethyleneglycol diaminopropyl ether   | 60.49 | 60.37  |
| Diethyleneglycol diethyl ether         | 44.49 | 44.25  |
| Diethyleneglycol monobutyl ether       | 43.92 | 43.97  |
| Diethyleneglycol-di-n-butylether       | 62.89 | 62.77  |
| Diethylketone                          | 25.24 | 25.56  |
| Diethylmethylamine                     | 29.25 | 29.15  |
| Diethylmethylchlorosilane              | 38.62 | 38.96  |
| Diethylmethylsilanol                   | 35.43 | 35.61  |
| Diethylnonylsilane                     | 71.6  | 71.79  |
| Diethyloctylsilane                     | 67.23 | 67.16  |
| Diethylperoxide                        | 24.83 | 24.78  |
| Diethylphenyl 1-isopropoxyethoxysilane | 80.26 | 80.12  |
| Diethylphosphate                       | 32.38 | 32.34  |
| Diethylphosphine                       | 30.62 | 30.84  |
| Diethylphosphinic chloride             | 30.44 | 30.26  |
| Diethylpropylthiophosphine             | 53.11 | 53.33  |
| Diethylsilane                          | 30.71 | 30.78  |
| Diethylsilanol                         | 31.62 | 31.25  |
| Diethyltrisulfide                      | 45.38 | 45.65  |
| Difluoroacetic acid                    | 13.44 | 12.89  |
| Difluorodiphenylsilane                 | 58.69 | 58.45  |
| Difurfuryl ether                       | 46.64 | 47.05  |
| Diglycidyl resorcinol ether            | 57.31 | 57.26  |
| Diheptyl ether                         | 68.81 | 68.65  |
| Diheptyl ethylphosphonate              | 86.91 | 86.75  |
| Diheptyl isophthalate                  | 105.2 | 104.46 |
| Diheptyl phosphite                     | 78.17 | 78.18  |
| Diheptyl sulfide                       | 75.08 | 74.88  |
| Dihexyl carbonate                      | 65.68 | 65.54  |
| Dihexyl disulfide                      | 73.66 | 73.82  |
| Dihexyl ethylphosphonate               | 77.58 | 77.49  |
| Dihexyl isophthalate                   | 95.95 | 95.2   |
| Dihexyl maleate                        | 79.74 | 79.52  |
| Dihexyl phosphite                      | 68.75 | 68.92  |
| Dihexyl sulfide                        | 65.73 | 65.62  |
| Dihexyl terephthalate                  | 95.42 | 95.2   |
| Dihexylamine                           | 61.17 | 61.07  |

|                                         |        |        |
|-----------------------------------------|--------|--------|
| Dihexylsulfate                          | 68.99  | 68.87  |
| Dihydro-2(3H)-thiophenone               | 26.45  | 26.78  |
| Dihydro-3-methyl-2(3H)-furanone         | 24.59  | 24.86  |
| Dihydro-3-methylene-2(3H)-furanone      | 24.2   | 24.66  |
| Dihydro-4-methyl-2(3H)-furanone         | 24.64  | 24.86  |
| Dihydrocarvone                          | 45.97  | 46.25  |
| Dihydrolinalool                         | 48.94  | 49.67  |
| Dihydropinene                           | 44.76  | 44.02  |
| Diisoamyl ether                         | 50.26  | 50.05  |
| Diisoamyl phthalate                     | 86.34  | 85.86  |
| Diisoamylbutylthioborane                | 79.99  | 79.9   |
| Diisobutoxythiophosphonate              | 56.87  | 56.93  |
| Diisobutyl adipate                      | 69.95  | 70.38  |
| Diisobutyl carbonate                    | 46.96  | 46.94  |
| Diisobutylamine                         | 42.83  | 42.47  |
| Diisobutylboronic anhydride             | 87.73  | 87.03  |
| Diisobutylbutylthioborane               | 71.06  | 70.64  |
| Diisobutylene                           | 38.77  | 38.92  |
| Diisobutylphosphinic chloride           | 48.73  | 48.7   |
| Diisobutylsulfite                       | 50.56  | 50.41  |
| Diisopentyl sulfide                     | 56.51  | 56.28  |
| Diisopentylamine                        | 52.26  | 51.73  |
| Diisopentylboronic anhydride            | 105.56 | 105.55 |
| Diisopropoxyphosphinylsulfenyl chloride | 53.99  | 54.06  |
| Diisopropyl adipate                     | 61.5   | 61.22  |
| Diisopropyl disulfide                   | 46.18  | 46.02  |
| Diisopropyl ether                       | 31.81  | 31.63  |
| Diisopropyl oxalate                     | 43.07  | 42.7   |
| Diisopropyl phthalate                   | 68.17  | 67.44  |
| Diisopropyl sulfide                     | 38.56  | 37.82  |
| Diisopropylamine                        | 33.72  | 33.15  |
| Diisopropylboronic anhydride            | 68.78  | 68.75  |
| Diisopropylphosphinic chloride          | 39.32  | 39.66  |
| Dill-Apiole                             | 59.24  | 59.43  |
| Dimethoxane                             | 42.32  | 41.86  |
| Dimethoxydiphenylsilane                 | 71.7   | 71.48  |
| Dimethoxymethane                        | 19.12  | 19.13  |
| Dimethyl 1,3-acetonedicarboxylate       | 38.99  | 38.26  |
| Dimethyl 2-butyndioate                  | 32.61  | 31.86  |
| Dimethyl 2-methylsuccinate              | 37.67  | 37.95  |
| Dimethyl 3-oxo-2-butyl phosphate        | 41.83  | 42.27  |
| Dimethyl azelate                        | 56.17  | 56.51  |

|                                                                       |       |       |
|-----------------------------------------------------------------------|-------|-------|
| Dimethyl bis(2,2-diethylhydrazino)silane                              | 71.55 | 71.74 |
| Dimethyl bis(2,2-dimethylhydrazino)silane                             | 53.54 | 53.38 |
| Dimethyl bis(2-chloropropoxy)silane                                   | 59.83 | 59.82 |
| Dimethyl butyl isopropylammonium<br>bis(trifluoromethylsulfonyl)amide | 78.81 | 79.06 |
| Dimethyl carbate                                                      | 51.78 | 51.87 |
| Dimethyl carbonate                                                    | 19.1  | 19.18 |
| Dimethyl chlorothiophosphate                                          | 34.62 | 34.66 |
| Dimethyl citraconate                                                  | 37.91 | 37.86 |
| Dimethyl cyclobutane-1,1-dicarboxylate                                | 40.7  | 40.46 |
| Dimethyl dipropylmalonate                                             | 56.07 | 56.49 |
| Dimethyl disulfide                                                    | 27.34 | 27.1  |
| Dimethyl ethylphosphonate                                             | 31.21 | 31.13 |
| Dimethyl glutarate                                                    | 37.6  | 37.99 |
| Dimethyl hexanedioate                                                 | 42.31 | 42.62 |
| Dimethyl hexyl isopropylammonium<br>bis(trifluoromethylsulfonyl)amide | 89.14 | 88.32 |
| Dimethyl isophthalate                                                 | 49.19 | 48.84 |
| Dimethyl itaconate                                                    | 37.5  | 37.75 |
| Dimethyl maleate                                                      | 32.83 | 33.16 |
| Dimethyl malonate                                                     | 28.53 | 28.73 |
| Dimethyl methylmalonate                                               | 33.18 | 33.32 |
| Dimethyl oxalate                                                      | 23.29 | 24.1  |
| Dimethyl phosphite                                                    | 22.4  | 22.56 |
| Dimethyl phthalate                                                    | 49.09 | 48.84 |
| Dimethyl sebacate                                                     | 60.88 | 61.14 |
| Dimethyl suberate                                                     | 51.56 | 51.88 |
| Dimethyl succinate                                                    | 33.01 | 33.36 |
| Dimethyl sulfate                                                      | 22.31 | 22.51 |
| Dimethyl sulfide                                                      | 19.45 | 18.9  |
| Dimethyl sulfite                                                      | 22.41 | 22.65 |
| Dimethyl sulfone                                                      | 20.47 | 19.74 |
| Dimethyl thiodipropionate                                             | 50.15 | 50.54 |
| Dimethylacetal                                                        | 23.79 | 23.82 |
| Dimethylacetamide                                                     | 24.21 | 24.5  |
| Dimethylamine                                                         | 14.26 | 14.85 |
| Dimethylaminoacetaldehyde diethylacetal                               | 45.42 | 46.3  |
| Dimethylcyanamide                                                     | 19.74 | 19.27 |
| Dimethyldi(2-ethylbutoxy)silane                                       | 78.27 | 78    |
| Dimethyldi(2-octyloxy)silane                                          | 96.44 | 96.62 |
| Dimethyldi-2-butoxysilane                                             | 59.68 | 59.58 |
| Dimethyldi-2-pentoxysilane                                            | 68.61 | 68.84 |

|                                                                      |        |        |
|----------------------------------------------------------------------|--------|--------|
| Dimethyldiacetoxysilane                                              | 40.81  | 40.82  |
| Dimethyldibutoxysilane                                               | 59.63  | 59.56  |
| Dimethyldidodecyloxysilane                                           | 133.43 | 133.64 |
| Dimethyldiheptoxysilane                                              | 87.25  | 87.34  |
| Dimethyldihexoxysilane                                               | 77.46  | 78.08  |
| Dimethyldiisopropoxysilane                                           | 49.53  | 50.32  |
| Dimethyldiisothiocyanatosilane                                       | 49.92  | 50.18  |
| Dimethyldimethoxysilane                                              | 31.51  | 31.72  |
| Dimethyldinonyloxysilane                                             | 105.67 | 105.86 |
| Dimethyldioctoxysilane                                               | 96.5   | 96.6   |
| Dimethyldipentoxysilane                                              | 68.38  | 68.82  |
| Dimethyldiphenoxysilane                                              | 71.56  | 71.4   |
| Dimethyldiphenylsilane                                               | 70.04  | 70.09  |
| Dimethyldipropoxysilane                                              | 50.94  | 50.3   |
| Dimethylether                                                        | 12.82  | 13.03  |
| Dimethylethylsilanol                                                 | 30.79  | 31.04  |
| Dimethylketazine                                                     | 36.03  | 36.04  |
| Dimethylperoxide                                                     | 15.4   | 15.46  |
| Dimethylphenylsilane                                                 | 45.04  | 45.55  |
| Dimethylphosphate                                                    | 23.51  | 23.02  |
| Dimethylphosphinic acid ethylester                                   | 30.57  | 30.82  |
| Dimethylpropylamine                                                  | 28.63  | 29.19  |
| Dimethylpropylisopropylammonium<br>bis(trifluoromethylsulfonyl)amide | 73.56  | 74.43  |
| Dimethyltrisulfide                                                   | 36     | 35.97  |
| Dimethylvinylethoxysilane                                            | 39.82  | 39.86  |
| Di-n-butylsulfite                                                    | 50.51  | 50.49  |
| Di-n-hexylether                                                      | 59.47  | 59.39  |
| Di-n-octylether                                                      | 78.1   | 77.91  |
| Dinonyl ether                                                        | 87.25  | 87.17  |
| Dinonyl isophthalate                                                 | 123.47 | 122.98 |
| Dinonyldiphenylsilane                                                | 144.5  | 144.05 |
| DINP                                                                 | 123.43 | 122.9  |
| Di-n-propylmaleate                                                   | 51.86  | 51.74  |
| Di-n-propylsulfate                                                   | 41.12  | 41.09  |
| Di-n-propylsulfone                                                   | 38.95  | 38.68  |
| Dioctyl butoxyborine                                                 | 100.02 | 100.79 |
| Dioctyl ethylphosphonate                                             | 96.2   | 96.01  |
| Dioctyl isophthalate                                                 | 113.93 | 113.72 |
| Dioctyl maleate                                                      | 98.08  | 98.04  |
| Dioctyl phosphite                                                    | 87.36  | 87.44  |
| Dioctyl sulfide                                                      | 84.25  | 84.14  |

|                                      |        |        |
|--------------------------------------|--------|--------|
| Diocetyl terephthalate               | 114.23 | 113.72 |
| Diocetylamine                        | 80.15  | 79.59  |
| Dipentyl carbonate                   | 56.18  | 56.28  |
| Dipentyl ethylphosphonate            | 68.27  | 68.23  |
| Dipentyl phosphite                   | 59.52  | 59.66  |
| Dipentyl sulfide                     | 56.38  | 56.36  |
| Diphenyl 2-ethylhexyl phosphate      | 99.44  | 99.63  |
| Diphenyl ether                       | 53.04  | 53.03  |
| Diphenyl fluorophosphate             | 60.29  | 61.1   |
| Diphenyl phosphonate                 | 61.69  | 61.72  |
| Diphenyl sulfide                     | 59.77  | 59.43  |
| Diphenylacetaldehyde                 | 60.04  | 61     |
| Diphenylketene                       | 61.03  | 60.63  |
| Diphenylmethane                      | 55.56  | 55.89  |
| Diphenylmethylamine                  | 58.67  | 59.25  |
| Diphenylmethylsilane                 | 65.28  | 65.43  |
| Diphenylmethylsilylamine             | 68.03  | 68.05  |
| Diphenylnonylsilane                  | 102.3  | 102.41 |
| Diphenylphosphinic chloride          | 59.47  | 59.8   |
| Diphenylphosphorous aziridide        | 73.51  | 73.79  |
| Diphenylsilane                       | 61.53  | 61.4   |
| Diphenylthiophosphoric aziride       | 79.51  | 79.36  |
| Dipropoxy butyl phosphorus           | 60.12  | 59.94  |
| Dipropoxy propyl phosphorus          | 54.82  | 55.31  |
| Dipropoxymethane                     | 37.89  | 37.71  |
| Dipropoxyphosphinylsulfenyl chloride | 53.99  | 54.04  |
| Dipropoxythiophosphonate             | 48.4   | 47.75  |
| Dipropyl adipate                     | 60.94  | 61.2   |
| Dipropyl azodicarboxylate            | 48.95  | 49     |
| Dipropyl butylphosphonate            | 59.41  | 58.97  |
| Dipropyl carbonate                   | 37.63  | 37.76  |
| Dipropyl disulfide                   | 45.9   | 46.04  |
| Dipropyl ether                       | 31.77  | 31.61  |
| Dipropyl ethylphosphonate            | 49.75  | 49.71  |
| Dipropyl fumarate                    | 52.46  | 51.74  |
| Dipropyl heptylphosphonate           | 73.35  | 72.86  |
| Dipropyl hexylphosphonate            | 68.7   | 68.23  |
| Dipropyl isophthalate                | 68.34  | 67.42  |
| Dipropyl octylphosphonate            | 77.98  | 77.49  |
| Dipropyl O-propyl phosphorus oxide   | 53.48  | 53.71  |
| Dipropyl oxalate                     | 42.89  | 42.68  |
| Dipropyl pentylphosphonate           | 64.04  | 63.6   |

|                                     |        |        |
|-------------------------------------|--------|--------|
| Dipropyl phosphite                  | 41     | 41.14  |
| Dipropyl propylphosphonate          | 54.89  | 54.34  |
| Dipropyl succinate                  | 51.61  | 51.94  |
| Dipropyl sulfide                    | 38.94  | 37.84  |
| Dipropyl terephthalate              | 68.16  | 67.42  |
| Dipropylacetamide                   | 42.14  | 42.94  |
| Dipropylamine                       | 33.52  | 33.29  |
| Dipropylbutylthioborane             | 61.51  | 61.46  |
| Dipropyldifluorosilane              | 37.24  | 37.09  |
| Dipropylene glycol monomethyl ether | 39.4   | 39.33  |
| Dipropylethylthioborane             | 52.48  | 52.2   |
| Dipropylisobutylaminoborane         | 55.99  | 56.09  |
| Dipropylperoxide                    | 34.02  | 34.04  |
| Dipropylphenylaminoborane           | 63.31  | 63.31  |
| Dipropylphenylthioborane            | 67.67  | 67.56  |
| Dipropylphosphinic chloride         | 39.21  | 39.52  |
| Dipropylsilane                      | 40.08  | 40.04  |
| Dipropylsulfoxide                   | 38.53  | 38.72  |
| Di-s-butylamine                     | 43.07  | 42.41  |
| Di-s-butylsulfide                   | 47.15  | 47.08  |
| Disilanomethane                     | 27.16  | 27.26  |
| Di-t-amyl disulfide                 | 64.85  | 65.3   |
| Di-t-amyl peroxide                  | 52.54  | 52.46  |
| Di-t-butyl ether                    | 40.76  | 40.77  |
| Di-t-butyl disulfide                | 55.88  | 56.04  |
| Di-t-butylsulfide                   | 48.29  | 47.84  |
| Di-t-butyltetrasulfide              | 73.99  | 73.78  |
| Di-t-butyltrisulfide                | 64.73  | 64.91  |
| Divinyl ether                       | 21.93  | 20.93  |
| Divinyl sulfide                     | 27.5   | 26.73  |
| Divinyl sulfone                     | 28.34  | 27.8   |
| DMSO                                | 20.17  | 19.78  |
| Docosane                            | 104.17 | 104    |
| Dodecahydrosqualene                 | 140.83 | 140.8  |
| Dodecamethylcyclohexasiloxane       | 111.89 | 111.9  |
| Dodecamethylpentasiloxane           | 104.79 | 104.9  |
| Dodecane                            | 57.63  | 57.7   |
| Dodecanedioic acid                  | 60.77  | 60.9   |
| Dodecanoic anhydride                | 115.65 | 115.05 |
| Dodecanoyl chloride                 | 63.6   | 63.16  |
| Dodecyl acetate                     | 68.43  | 68.71  |
| Dodecyl thiocyanate                 | 70.27  | 70.2   |



|                                            |        |        |
|--------------------------------------------|--------|--------|
| Dodecylcyclohexane                         | 83.45  | 83.3   |
| Dodecyloxirane                             | 66.34  | 66.52  |
| DTBP                                       | 43.45  | 43.2   |
| d-Verbenone                                | 44.23  | 44.2   |
| E-beta-Caryophyllene                       | 66.07  | 66.84  |
| Eicosamethylnonasiloxane                   | 179.3  | 179.5  |
| Eicosane                                   | 94.9   | 94.74  |
| Elaidic acid                               | 86.9   | 86.88  |
| Enanthic acid                              | 35.88  | 36.15  |
| Entprol                                    | 80.36  | 80.28  |
| Epichlorohydrin                            | 20.47  | 20.39  |
| Eps-Chlorocapronitrile                     | 34.54  | 34.51  |
| Ethane                                     | 11.28  | 11.4   |
| Ethanediol diacetate                       | 33.2   | 33.42  |
| Ethanesulfonic acid                        | 21.48  | 22.02  |
| Ethanesulfonylchloride                     | 25.61  | 25.24  |
| Ethanethioic acid S-(1-methylheptyl) ester | 57.02  | 56.69  |
| Ethanol                                    | 12.92  | 12.81  |
| Ethene                                     | 10.99  | 10.98  |
| Ethoglucid                                 | 63.77  | 63.58  |
| Ethoheptazine                              | 76.67  | 76.45  |
| Ethoxyacetaldehyde                         | 22.45  | 22.87  |
| Ethoxyacetic acid                          | 23.88  | 23.95  |
| Ethoxyacetylchloride                       | 27.79  | 27.81  |
| Ethoxyacetylene                            | 20.55  | 20.41  |
| Ethoxybenzene                              | 37.71  | 37.7   |
| Ethoxydichloromethylsulfenyl chloride      | 40.91  | 40.82  |
| Ethoxytriethylsilane                       | 49.1   | 49.38  |
| Ethoxytriethylsilane                       | 105.58 | 104.94 |
| Ethoxytrimethylsilane                      | 35.67  | 35.67  |
| Ethyl (4-methoxyphenyl)acetate             | 52.74  | 53.49  |
| Ethyl (E)-3-chloro-2-butenate              | 37.06  | 36.39  |
| Ethyl (Z)-3-chloro-2-butenate              | 36.93  | 36.39  |
| Ethyl 10-undecenoate                       | 64.01  | 63.77  |
| Ethyl 1-naphthaleneacetate                 | 64.53  | 64.93  |
| Ethyl 1-Naphthoate                         | 60.47  | 60.3   |
| Ethyl 1-piperidinepropanoate               | 51.97  | 51.87  |
| Ethyl 2-(methoxyethyl)acetoacetate         | 47.67  | 47.45  |
| Ethyl 2,3-dibromopropionate                | 42.6   | 42.57  |
| Ethyl 2,3-dichloropropionate               | 36.93  | 36.6   |
| Ethyl 2,4-dibromobutanoate                 | 47.11  | 47.2   |
| Ethyl 2-acetyl-3-methylbutanoate           | 45.7   | 45.75  |

|                                      |       |       |
|--------------------------------------|-------|-------|
| Ethyl 2-acetyl-4-pentenoate          | 45.21 | 45.48 |
| Ethyl 2-acetylhexanoate              | 50.53 | 50.42 |
| Ethyl 2-acetylpentanoate             | 45.63 | 45.79 |
| Ethyl 2-aminoacetate                 | 25.62 | 25.84 |
| Ethyl 2-bromo-2-methylpropanoate     | 39.11 | 39.57 |
| Ethyl 2-bromo-3-methylbutyrate       | 44    | 44.05 |
| Ethyl 2-bromoacrylate                | 34    | 34.14 |
| Ethyl 2-bromobutyrate                | 39.3  | 39.46 |
| Ethyl 2-bromopropionate              | 34.35 | 34.83 |
| Ethyl 2-butyrate                     | 30.48 | 30.17 |
| Ethyl 2-chlorobutanoate              | 35.72 | 36.43 |
| Ethyl 2-chloropropionate             | 31.88 | 31.8  |
| Ethyl 2-cyano-2-phenylacetate        | 51.11 | 51.35 |
| Ethyl 2-cyclopentanone-1-carboxylate | 39.07 | 39.02 |
| Ethyl 2-ethylacetoacetate            | 40.78 | 41.16 |
| Ethyl 2-ethylcaproate                | 49.96 | 50.15 |
| Ethyl 2-furancarboxylate             | 35.61 | 34.76 |
| Ethyl 2-hydroxy-3-butenate           | 32.5  | 32.78 |
| Ethyl 2-methoxybenzoate              | 49.44 | 48.86 |
| Ethyl 2-methylacetoacetate           | 36.59 | 36.53 |
| Ethyl 2-methylbenzoate               | 47.33 | 47.15 |
| Ethyl 2-naphthaleneacetate           | 64.83 | 64.93 |
| Ethyl 2-naphthoate                   | 61.02 | 60.3  |
| Ethyl 2-picolinate                   | 40.42 | 40.21 |
| Ethyl 2-thiophenecarboxylate         | 41.17 | 40.81 |
| Ethyl 3,5-dinitrobenzoate            | 55.78 | 55.68 |
| Ethyl 3-aminobenzoate                | 45.62 | 46.41 |
| Ethyl 3-bromopropionate              | 34.55 | 34.78 |
| Ethyl 3-butenate                     | 31.04 | 31.36 |
| Ethyl 3-chlorobutanoate              | 35.65 | 36.43 |
| Ethyl 3-chloropropionate             | 31.53 | 31.84 |
| Ethyl 3-cyclohexene-1-carboxylate    | 43.42 | 43.18 |
| Ethyl 3-ethoxypropionate             | 37.88 | 37.99 |
| Ethyl 3-hydroxybutyrate              | 32.76 | 33.09 |
| Ethyl 3-methyl-2-butenate            | 36.32 | 36.17 |
| Ethyl 3-oxopentanoate                | 36.28 | 36.57 |
| Ethyl 4-bromoacetoacetate            | 39.39 | 39.68 |
| Ethyl 4-bromobenzoate                | 50.44 | 49.93 |
| Ethyl 4-bromobutyrate                | 39.15 | 39.41 |
| Ethyl 4-chloroacetoacetate           | 36.45 | 36.74 |
| Ethyl 4-chlorobutyrate               | 36.25 | 36.47 |
| Ethyl 4-fluorobenzoate               | 42.16 | 42.24 |

|                                        |       |       |
|----------------------------------------|-------|-------|
| Ethyl 4-methoxybenzoate                | 50.06 | 48.86 |
| Ethyl 4-methyl-3-oxopentanoate         | 41.28 | 41.16 |
| Ethyl 4-methylbenzoate                 | 47.74 | 47.15 |
| Ethyl 4-methylcaproate                 | 44.55 | 45.52 |
| Ethyl 4-methylpentanoate               | 40.61 | 40.89 |
| Ethyl 4-pyridinecarboxylate            | 40.2  | 40.04 |
| Ethyl 5-bromovalerate                  | 43.3  | 44.04 |
| Ethyl 5-oxohexanoate                   | 41.13 | 41.2  |
| Ethyl 6-bromohexanoate                 | 49.05 | 48.67 |
| Ethyl acetate                          | 22.26 | 22.41 |
| Ethyl acetoacetate                     | 31.57 | 31.94 |
| Ethyl acrylate                         | 26.68 | 26.73 |
| Ethyl amyl ether                       | 36.36 | 36.24 |
| Ethyl benzoate                         | 42.46 | 42.34 |
| Ethyl bis(2,2-diethylhydrazino)silane  | 71.76 | 71.89 |
| Ethyl bis(2,2-dimethylhydrazino)silane | 53.67 | 53.53 |
| Ethyl bis(2-chloropropoxy)silane       | 59.73 | 60.03 |
| Ethyl bis(diethylamino)silane          | 64.26 | 64.29 |
| Ethyl bis(N,N-diethylamino) phosphate  | 64.01 | 64.07 |
| Ethyl bis(N,N-dimethylamino) phosphate | 45.57 | 45.71 |
| Ethyl bromoacetate                     | 29.79 | 30.15 |
| Ethyl but-3-yne- 1-carboxylate         | 34.05 | 34.26 |
| Ethyl butanoate                        | 31.51 | 31.67 |
| Ethyl butylxanthate                    | 53.65 | 52.67 |
| Ethyl caprylate                        | 50.11 | 50.19 |
| Ethyl chlorofluoroacetate              | 27.36 | 27.32 |
| Ethyl chlorofluorophosphate            | 25.43 | 25.36 |
| Ethyl chloroformate                    | 23.04 | 22.8  |
| Ethyl chlorohydroxyacetate             | 28.58 | 28.74 |
| Ethyl crotonate                        | 31.77 | 31.47 |
| Ethyl cyanoacetate                     | 26.73 | 26.83 |
| Ethyl cyanoformate                     | 22.99 | 22.2  |
| Ethyl cyclohexylacetate                | 48.07 | 48.01 |
| Ethyl cyclopropanecarboxylate          | 30    | 29.49 |
| Ethyl decanoate                        | 59.29 | 59.45 |
| Ethyl diacetylacetate                  | 43.42 | 42.33 |
| Ethyl dibromoacetate                   | 38.19 | 37.69 |
| Ethyl dichloroacetate                  | 32.17 | 32.07 |
| Ethyl diethoxyacetate                  | 44.32 | 44.15 |
| Ethyl diethylmalonate                  | 57.23 | 56.55 |
| Ethyl dodecanoate                      | 68.61 | 68.71 |
| Ethyl elaidate                         | 95.95 | 96.29 |

|                                               |       |       |
|-----------------------------------------------|-------|-------|
| Ethyl ethanethiolsulfinate                    | 38.23 | 38.41 |
| Ethyl ether                                   | 22.49 | 22.35 |
| Ethyl ethoxyacetate                           | 33.31 | 33.36 |
| Ethyl ethylcarbamate                          | 30.31 | 30.3  |
| Ethyl fluoroacetate                           | 22.28 | 22.33 |
| Ethyl fluorophosphoric acid                   | 21.94 | 21.55 |
| Ethyl formate                                 | 17.8  | 17.91 |
| Ethyl glycolate                               | 23.71 | 23.82 |
| Ethyl heptafluorobutanoate                    | 32.59 | 32.71 |
| Ethyl heptanoate                              | 44.47 | 45.56 |
| Ethyl hexadecanoate                           | 86.5  | 87.23 |
| Ethyl hexanoate                               | 40.69 | 40.93 |
| Ethyl hexyl carbonate                         | 46.97 | 47.02 |
| Ethyl hydrocinnamate                          | 51.26 | 51.6  |
| Ethyl hydrogen succinate                      | 33.11 | 33.27 |
| Ethyl hydroperoxide                           | 15.41 | 15.14 |
| Ethyl hydrosorbate                            | 40.64 | 40.73 |
| Ethyl iodide                                  | 24.23 | 24.28 |
| Ethyl iodoacetate                             | 35.1  | 35.29 |
| Ethyl isobutanoate                            | 31.5  | 31.63 |
| Ethyl isobutyl 2-chloropropoxysilane          | 59.24 | 59.06 |
| Ethyl isocrotonate                            | 31.73 | 31.47 |
| Ethyl isocyanate                              | 18.27 | 18.48 |
| Ethyl isonitrile                              | 16.51 | 16.31 |
| Ethyl isothiocyanate                          | 26.22 | 26.04 |
| Ethyl isovalerate                             | 36.15 | 36.26 |
| Ethyl lactate                                 | 28.49 | 28.46 |
| Ethyl levulinate                              | 36.3  | 36.57 |
| Ethyl linolenate                              | 95.77 | 95.89 |
| Ethyl mercaptan                               | 19.34 | 19.07 |
| Ethyl mercaptoacetate                         | 29.92 | 30.08 |
| Ethyl methacrylate                            | 31.27 | 31.43 |
| Ethyl methyl carbonate                        | 23.71 | 23.84 |
| Ethyl methyl disulfide                        | 32.54 | 31.94 |
| Ethyl methyl ketone oxime                     | 24.92 | 24.97 |
| Ethyl methyl sulfide                          | 23.85 | 23.74 |
| Ethyl myristate                               | 78.24 | 77.97 |
| Ethyl N,N-diethylamino phosphorusoxy chloride | 46.24 | 46.21 |
| Ethyl N-butylcarbamate                        | 39.58 | 39.56 |
| Ethyl nicotinate                              | 40.33 | 40.04 |
| Ethyl nitroacetate                            | 28.47 | 28.15 |
| Ethyl N-methylcarbamate                       | 25.71 | 25.71 |

|                                        |       |       |
|----------------------------------------|-------|-------|
| Ethyl nonanoate                        | 54.69 | 54.82 |
| Ethyl N-phenylcarbamate                | 46.67 | 46.62 |
| Ethyl N-phenylformimidate              | 45.7  | 44.86 |
| Ethyl oleate                           | 95.98 | 96.29 |
| Ethyl orthoformate                     | 39.63 | 39.63 |
| Ethyl pentanoate                       | 36.94 | 36.3  |
| Ethyl pentyl carbonate                 | 42.34 | 42.39 |
| Ethyl phenoxyacetate                   | 49.02 | 48.71 |
| Ethyl phenyl butoxyborine              | 61.09 | 61.05 |
| Ethyl phenyl fluorophosphate           | 45.99 | 46.18 |
| Ethyl phenylacetate                    | 46.58 | 46.97 |
| Ethyl phenylglyoxylate                 | 48.19 | 47.24 |
| Ethyl pivalate                         | 36.1  | 36.28 |
| Ethyl propanoate                       | 27    | 27.04 |
| Ethyl propiolate                       | 25.23 | 25    |
| Ethyl propyl carbonate                 | 33.01 | 33.13 |
| Ethyl propyl fluorophosphate           | 35.64 | 35.89 |
| Ethyl propyl sulfide                   | 33.21 | 33.21 |
| Ethyl pyruvate                         | 26.87 | 27.31 |
| Ethyl ricinoleate                      | 97.75 | 97.71 |
| Ethyl salicylate                       | 45.29 | 44.11 |
| Ethyl t-butyl ether                    | 31.83 | 31.56 |
| Ethyl t-butyl ketone                   | 34.56 | 34.8  |
| Ethyl thiocyanate                      | 24.07 | 23.9  |
| Ethyl trans-2-methyl-2-butenolate      | 36.28 | 36.17 |
| Ethyl tribromoacetate                  | 45.97 | 46.34 |
| Ethyl trichloroacetate                 | 37.22 | 37.13 |
| Ethyl trifluoroacetate                 | 22.8  | 22.69 |
| Ethyl tris(2,2-diethylhydrazino)silane | 96.93 | 96.81 |
| Ethyl undecanoate                      | 63.94 | 64.08 |
| Ethyl vinyl ether                      | 21.84 | 21.65 |
| Ethylacetamide                         | 24.08 | 24.05 |
| Ethylamine                             | 14.93 | 14.83 |
| Ethylaminotriethylsilane               | 51.46 | 51.36 |
| Ethylammonium nitrate                  | 24.14 | 24.11 |
| Ethylbenzene                           | 35.95 | 35.96 |
| Ethylbenzene sulfonate                 | 45.63 | 45.72 |
| Ethylcyclobutane                       | 28.13 | 27.74 |
| Ethylcyclohexane                       | 37.01 | 37    |
| Ethylcyclohexyldifluorosilane          | 44.31 | 44.26 |
| Ethylcyclopentane                      | 32.4  | 32.37 |
| Ethylcyclopropane                      | 23.85 | 23.11 |

|                                         |       |       |
|-----------------------------------------|-------|-------|
| Ethyldibutoxysilane                     | 59.63 | 59.77 |
| Ethyldiisopropylamin                    | 43.51 | 42.86 |
| Ethyldimethyl 1-(3-pentoxy)ethoxysilane | 64.89 | 64.93 |
| Ethyldimethylamine                      | 24.54 | 24.56 |
| Ethylene glycol diformate               | 24.45 | 24.42 |
| Ethylene glycol dimethacrylate          | 50.9  | 51.46 |
| Ethylene glycol monostearate            | 96.86 | 97.9  |
| Ethylene glycol monosulfite             | 20.03 | 20.57 |
| Ethylenediamine                         | 18.21 | 18.26 |
| Ethylenedichloride                      | 21.03 | 21    |
| Ethylepoxide                            | 20.37 | 20.22 |
| Ethylidenecyclohexane                   | 36.84 | 36.91 |
| Ethylidoacetylene                       | 31.7  | 31.37 |
| Ethyl-isoamylketone                     | 39.15 | 39.41 |
| Ethylisobutylsilanol                    | 40.4  | 40.47 |
| Ethylisopropylether                     | 27.68 | 26.99 |
| Ethylisopropylketone                    | 29.67 | 30.15 |
| Ethylmethylether                        | 17.47 | 17.69 |
| Ethyl-n-hexylether                      | 40.96 | 40.87 |
| Ethylnitrate                            | 19.26 | 19.02 |
| Ethylnitrite                            | 17.59 | 17.5  |
| Ethyl-n-propylether                     | 26.96 | 26.98 |
| Ethylphenylboronic acid                 | 42.13 | 41.55 |
| Ethylphenylboronic anhydride            | 82.57 | 81.79 |
| Ethylphenylchlorosilane                 | 49.44 | 50.01 |
| Ethylphenylphosphinic chloride          | 45.35 | 45.03 |
| Ethyl-phenyl-propylthiophosphine        | 68.64 | 68.1  |
| Ethylphosphinic dichloride              | 30.33 | 30.59 |
| Ethylphosphonyl difluoride              | 19.16 | 19.06 |
| Ethylpropylphosphinic chloride          | 34.79 | 34.89 |
| Ethylsulfinyl chloride                  | 25.9  | 25.75 |
| Ethylthio dioctyl borane                | 98.03 | 98.5  |
| Ethylthiodiethylborane                  | 42.82 | 42.94 |
| Ethyltributoxysilane                    | 78.67 | 78.95 |
| Ethyltrichlorosilane                    | 33.83 | 34.01 |
| Ethyltriethoxysilane                    | 51.5  | 51.17 |
| Ethyltriisothiocyanatosilane            | 64.17 | 64.47 |
| Ethyltrimethoxysilane                   | 37.01 | 37.19 |
| Ethyne                                  | 8.4   | 8.82  |
| Ethynylbenzene                          | 34.83 | 33.92 |
| Etohexadiol                             | 42.12 | 41.97 |
| Eucarvone                               | 47.24 | 46.22 |

|                               |       |       |
|-------------------------------|-------|-------|
| Exalgin                       | 45.24 | 45.01 |
| Exaltol                       | 70.75 | 70.87 |
| exo-Dicyclopentadiene         | 42.16 | 41.46 |
| Farnesol                      | 72.11 | 72.61 |
| Fenchlorphos                  | 69.36 | 69.64 |
| Fenchone                      | 44.76 | 44.35 |
| Fichtelite                    | 83.03 | 83.43 |
| Fluorene                      | 54.69 | 54.11 |
| Fluoro-2,4,6-trimethylbenzene | 40.35 | 40.85 |
| Fluoroacetone                 | 16.72 | 16.22 |
| Fluorobenzene                 | 26.15 | 26.42 |
| Fluoroethane                  | 11.18 | 11.32 |
| Fluoroethyldiisopropylsilane  | 47.71 | 47.87 |
| Fluorotributylsilane          | 66.71 | 66.29 |
| Fluorotriethylsilane          | 38.1  | 38.51 |
| Fluorotripentylsilane         | 80.3  | 80.18 |
| Fluorotripropylsilane         | 52.33 | 52.4  |
| Formaldehyde diethylacetal    | 28.65 | 28.45 |
| Formamide                     | 10.62 | 10.06 |
| Formanilide                   | 36.06 | 35.88 |
| Formic acid                   | 8.56  | 8.5   |
| Freon 113                     | 26.17 | 26.06 |
| Fulvene                       | 27.5  | 27.14 |
| Fumaric acid dichloride       | 31.97 | 31.38 |
| Furan                         | 18.16 | 19.01 |
| Furfural                      | 25.44 | 24.27 |
| Furfuranol                    | 24.97 | 25.16 |
| Furfuryl butyrate             | 43.71 | 44.02 |
| Furfuryl propionate           | 38.89 | 39.39 |
| Furfurylacetate               | 34.6  | 34.76 |
| gamma-Butyrolactone           | 19.94 | 20.27 |
| gamma-Caprolactone            | 29.87 | 29.54 |
| gamma-Coniceine               | 39.63 | 40.21 |
| gamma-Octanoic lactone        | 38.64 | 38.8  |
| gamma-Terpinene               | 45.3  | 46    |
| gamma-Undecanolactone         | 52.28 | 52.69 |
| gamma-Valerolactone           | 24.65 | 24.91 |
| Geranyl 2-methylpropanoate    | 67.99 | 68.41 |
| Geranyl acetate               | 58.94 | 59.19 |
| Glutaconodinitrile            | 25.03 | 24.67 |
| Glycerol 1,3-dinitrate        | 33.45 | 32.69 |
| Glycerol 1-butanoate          | 38.84 | 39.13 |

|                               |        |        |
|-------------------------------|--------|--------|
| Glycerol 1-oleate             | 104.17 | 103.75 |
| Glycerol tricaproate          | 103.79 | 104.63 |
| Glycerol tristearate          | 271.13 | 271.31 |
| Glyceryl tributanoate         | 76.37  | 76.85  |
| Glyceryl-1-nitrate            | 27     | 26.48  |
| Glyceryltriacetate            | 48.68  | 49.07  |
| Glycidyl acrylate             | 30.94  | 30.92  |
| Glycidyl methacrylate         | 36.52  | 35.62  |
| Glycolaldehyde                | 12.43  | 13.33  |
| Glyme                         | 24     | 23.98  |
| Glyoxal                       | 11.86  | 12.44  |
| Guaiol                        | 68.57  | 68.49  |
| Hemimellitene                 | 40.45  | 40.95  |
| Heneicosane                   | 99.5   | 99.37  |
| Heptacosane                   | 127.31 | 127.15 |
| Heptadecane                   | 80.96  | 80.85  |
| Heptadecanonitrile            | 80.75  | 80.64  |
| Heptadecylbenzene             | 105.42 | 105.41 |
| Heptafluorobutanoic anhydride | 43.93  | 43.05  |
| Heptafluorobutanoyl chloride  | 27.01  | 27.16  |
| Heptaldoxime                  | 38.17  | 39.06  |
| Heptane                       | 34.6   | 34.55  |
| Heptanedioic acid             | 37.6   | 37.75  |
| Heptanoamide                  | 38.51  | 37.7   |
| Heptanoic anhydride           | 67.65  | 68.75  |
| Heptanonitrile                | 34.01  | 34.34  |
| Heptanophenone                | 59.41  | 59.38  |
| Heptanoyl chloride            | 40.4   | 40.01  |
| Heptasilane                   | 84.77  | 84.84  |
| Heptyl 1-naphthaleneacetate   | 87.72  | 88.08  |
| Heptyl 1-naphthoate           | 83.98  | 83.45  |
| Heptyl 1-naphthylketone       | 82.14  | 81.97  |
| Heptyl 2-naphthaleneacetate   | 88.02  | 88.08  |
| Heptyl 2-thiophenecarboxylate | 64.52  | 63.96  |
| Heptyl bromide                | 42.24  | 42.29  |
| Heptyl butyrate               | 54.94  | 54.82  |
| Heptyl pentanoate             | 59.45  | 59.45  |
| Heptylbenzene                 | 59.14  | 59.11  |
| Heptylcyclohexane             | 60.25  | 60.15  |
| Heptylcyclopentane            | 55.61  | 55.52  |
| Heptyliodoacetylene           | 54.51  | 54.52  |
| Heptyloxytrimethylsilane      | 58.8   | 58.82  |



|                                           |        |        |
|-------------------------------------------|--------|--------|
| Heptylphosphinic dichloride               | 53.59  | 53.74  |
| Hexabromoethane                           | 59.48  | 59.26  |
| Hexachloroacetone                         | 45.51  | 45.74  |
| Hexachlorobutadiene                       | 49.82  | 49.5   |
| Hexachloropropylene                       | 44.83  | 45.17  |
| Hexacosane                                | 123.12 | 122.52 |
| Hexacosanoic acid                         | 125.03 | 124.12 |
| Hexadecamethylheptasiloxane               | 142.31 | 142.2  |
| Hexadecanedioic acid                      | 79.29  | 79.42  |
| Hexadecanenitrile                         | 76.11  | 76.01  |
| Hexadecanoyl chloride                     | 82.15  | 81.68  |
| Hexadecyl acetate                         | 88.1   | 87.23  |
| Hexadecyl vinyl ether                     | 86.94  | 86.47  |
| Hexadecylamine                            | 79.76  | 79.65  |
| Hexadecylbenzene                          | 100.79 | 100.78 |
| Hexadecylcyclohexane                      | 102.54 | 101.82 |
| Hexaethyl tetraphosphate                  | 100.69 | 100.7  |
| Hexaethylbenzene                          | 83.33  | 83.16  |
| Hexaethyldisiloxane                       | 75.92  | 76.37  |
| Hexaethylene glycol                       | 68.66  | 68.97  |
| Hexaethyltetraphosphate                   | 100.69 | 100.7  |
| Hexafluorobenzene                         | 26.49  | 25.92  |
| Hexafluoropropyl-1,3-diisocyanate         | 31.17  | 30.83  |
| Hexahydro-1-methyl-1H-1,4-diazepine       | 35.41  | 35.01  |
| Hexamethyldisilane                        | 51.42  | 51.36  |
| Hexamethyldisiloxane                      | 48.94  | 48.95  |
| Hexane                                    | 29.76  | 29.92  |
| Hexanenitrile                             | 29.69  | 29.71  |
| Hexanoic anhydride                        | 59.88  | 59.49  |
| Hexanophenone                             | 54.38  | 54.75  |
| Hexanoyl chloride                         | 35.28  | 35.38  |
| Hexapropyldisiloxane                      | 104.05 | 104.15 |
| Hexasilane                                | 72.78  | 72.8   |
| Hexyl 1-naphthaleneacetate                | 82.94  | 83.45  |
| Hexyl 1-naphthoate                        | 79.31  | 78.82  |
| Hexyl 1-naphthylketone                    | 77.42  | 77.34  |
| Hexyl 2-naphthaleneacetate                | 83.51  | 83.45  |
| Hexyl 2-naphthoate                        | 79.87  | 78.82  |
| Hexyl 2-thiophenecarboxylate              | 59.84  | 59.33  |
| Hexyl bromide                             | 37.62  | 37.66  |
| Hexyl butanoate                           | 49.97  | 50.19  |
| Hexyl cyclohexyloxy dithiophosphinic acid | 81.44  | 81.63  |

|                                        |        |        |
|----------------------------------------|--------|--------|
| Hexyl dichloro phosphorus thioxide     | 56.49  | 56.47  |
| Hexyl hexanoate                        | 59.39  | 59.45  |
| Hexyl hexyloxy dithiophosphinic acid   | 83.77  | 83.76  |
| Hexyl isopentoxy dithiophosphinic acid | 79.13  | 79.09  |
| Hexyl methacrylate                     | 49.88  | 49.95  |
| Hexyl methoxy dithiophosphinic acid    | 60.39  | 60.58  |
| Hexyl nitrite                          | 36.1   | 36.02  |
| Hexyl octanoate                        | 68.9   | 68.71  |
| Hexyl octyloxy dithiophosphinic acid   | 92.81  | 93.02  |
| Hexyl pentanoate                       | 54.92  | 54.82  |
| Hexyl perfluorobutyrate                | 51.46  | 51.23  |
| Hexyl phenyl sulfide                   | 62.96  | 62.79  |
| Hexyl propanoate                       | 46.63  | 45.56  |
| Hexylbenzene                           | 54.37  | 54.48  |
| Hexylcyclohexane                       | 55.6   | 55.52  |
| Hexylcyclopentane                      | 50.97  | 50.89  |
| Hexyldichloroborane                    | 44.07  | 44.03  |
| Hexyleneglycol                         | 32.91  | 32.7   |
| Hexyloxybenzene                        | 56.38  | 56.22  |
| Hexyloxytrimethylsilane                | 54.16  | 54.19  |
| Hexylphosphinic dichloride             | 49.88  | 49.11  |
| Hexylsilane                            | 40.34  | 40.3   |
| HMDS                                   | 51.55  | 51.3   |
| Homocamfin                             | 46.84  | 46.36  |
| Hydroabietyl acrylate                  | 102.42 | 103.32 |
| Hydrocinnamionitrile                   | 40.24  | 40.38  |
| Hydrocinnamyl alcohol                  | 42.66  | 42     |
| Hydroxycitronellal                     | 50.15  | 50.28  |
| Imidazole                              | 18.77  | 18.64  |
| Indane                                 | 38.34  | 38.63  |
| Indene                                 | 38.64  | 38.43  |
| Iodoacetonitrile                       | 23.89  | 24.07  |
| Iodobenzene                            | 39.14  | 39.09  |
| Iodocyclopentane                       | 36.24  | 36.36  |
| Iodopentafluorobenzene                 | 38.76  | 38.59  |
| Iodopentafluoroethane                  | 24.66  | 24.49  |
| Iophendylate                           | 102.07 | 101.17 |
| Isoamyl acetate                        | 36.4   | 36.26  |
| iso-Amyl dichloro phosphorus oxide     | 43     | 43.49  |
| iso-Amyl dichloro phosphorus thioxide  | 51.82  | 51.8   |
| Isoamyl iodide                         | 38.13  | 38.13  |
| Isoamyl lactate                        | 42.17  | 42.31  |

|                                                                 |        |        |
|-----------------------------------------------------------------|--------|--------|
| Isoamylisonitrile                                               | 29.61  | 30.16  |
| Isobutyric anhydride                                            | 40.76  | 40.89  |
| Isobutyl 2-chloropropionate                                     | 40.8   | 41.02  |
| Isobutyl 3-chloropropionate                                     | 41.16  | 41.06  |
| Isobutyl acetate                                                | 31.62  | 31.63  |
| Isobutyl acrylate                                               | 36.08  | 35.95  |
| Isobutyl allyloxy dithiophosphinic acid                         | 59.89  | 60.37  |
| Isobutyl bromide                                                | 28.1   | 28.36  |
| Isobutyl butyrate                                               | 42.1   | 40.89  |
| Isobutyl chloride                                               | 25.49  | 25.42  |
| Isobutyl chlorocarbonate                                        | 32.25  | 32.02  |
| Isobutyl cyclohexylchloroboronate                               | 56.96  | 56.76  |
| Isobutyl dichloro phosphorus oxide                              | 38.98  | 38.97  |
| Isobutyl diisobutoxy phosphorus                                 | 69.62  | 69.08  |
| Isobutyl ethoxyethoxy dithiophosphinic acid                     | 66.91  | 67     |
| Isobutyl ethoxyethoxy S-(2-cyanoethyl)<br>dithiophosphinate     | 79.97  | 80.28  |
| Isobutyl formate                                                | 27.32  | 27.13  |
| Isobutyl iodide                                                 | 33.52  | 33.5   |
| Isobutyl isobutyrate                                            | 40.92  | 40.85  |
| Isobutyl isopropoxy dithiophosphinic acid                       | 60.92  | 60.69  |
| Isobutyl isopropoxy S-methoxycarbonylethyl<br>dithiophosphinate | 81.14  | 80.53  |
| Isobutyl isothiocyanate                                         | 35.21  | 35.26  |
| Isobutyl isovalerate                                            | 45.54  | 45.48  |
| Isobutyl methacrylate                                           | 40.62  | 40.65  |
| Isobutyl methyl ketone                                          | 30.23  | 30.15  |
| Isobutyl nitrate                                                | 28.62  | 28.24  |
| Isobutyl propanoate                                             | 35.33  | 36.26  |
| Isobutyl ricinoleate                                            | 106.34 | 106.93 |
| Isobutyl salicylate                                             | 54.49  | 53.33  |
| Isobutyl t-butylether                                           | 41.17  | 40.78  |
| Isobutyl trichloroacetate                                       | 46.53  | 46.35  |
| Isobutyl urethane                                               | 39.67  | 39.52  |
| Isobutyl valerate                                               | 44.93  | 45.52  |
| Isobutyl vinyl ether                                            | 31.49  | 30.87  |
| Isobutylbenzene                                                 | 45.21  | 45.18  |
| Isobutylcyclohexane                                             | 46.36  | 46.22  |
| Isobutylcyclopentane                                            | 41.96  | 41.59  |
| Isobutyldimethylamine                                           | 33.85  | 33.78  |
| Isobutylnitrite                                                 | 26.91  | 26.72  |
| iso-Butylsilane                                                 | 31.05  | 31     |

|                                                   |       |       |
|---------------------------------------------------|-------|-------|
| Isobutyronitrile                                  | 20.39 | 20.41 |
| Isobutyroylbromide                                | 29.14 | 29.03 |
| Isobutyroylchloride                               | 25.83 | 26.08 |
| Isocrotonic acid                                  | 22.32 | 22.06 |
| Isocumene                                         | 40.41 | 40.59 |
| Isodecyl acrylate                                 | 63.43 | 63.73 |
| Isofluorophate                                    | 40.72 | 40.54 |
| Isohexanoic acid                                  | 31.49 | 31.48 |
| Isooctane                                         | 38.99 | 39.12 |
| Isopentane                                        | 25.31 | 25.25 |
| Isopentene                                        | 24.85 | 25.05 |
| Isopentyl 2-chloropropanoate                      | 45.82 | 45.65 |
| Isopentyl alcohol                                 | 26.68 | 26.66 |
| Isopentyl bromide                                 | 33.11 | 32.99 |
| Isopentyl butanoate                               | 45.42 | 45.52 |
| Isopentyl chloride                                | 30.08 | 30.05 |
| Isopentyl dichloro phosphorus oxide               | 43.5  | 43.6  |
| Isopentyl ethoxyethoxy dithiophosphinic acid      | 71.62 | 71.63 |
| Isopentyl formate                                 | 31.88 | 31.76 |
| Isopentyl isopentanoate                           | 50.05 | 50.11 |
| iso-Pentyl isopropoxy dithiophosphinic acid       | 65.48 | 65.21 |
| Isopentyl methoxyethoxy dithiophosphinic acid     | 66.86 | 66.97 |
| Isopentyl nitrite                                 | 31.59 | 31.35 |
| Isopentyl propionate                              | 40.81 | 40.89 |
| Isopentyl propoxy dithiophosphinic acid           | 65.41 | 65.31 |
| Isopentyl salicylate                              | 58.93 | 57.96 |
| Isopentylamine                                    | 28.67 | 28.68 |
| Isopentylbenzene                                  | 49.78 | 49.81 |
| Isopentyloxytrimethylsilane                       | 49.54 | 49.52 |
| Isophorol                                         | 42.94 | 42.94 |
| Isophthaloylchloride                              | 47.99 | 47.06 |
| Isophytol                                         | 94.82 | 95.67 |
| Isoprene                                          | 25.49 | 24.74 |
| Isopropanolamine                                  | 20.92 | 20.88 |
| Isopropenyl methyl ketone                         | 25.07 | 25.32 |
| Isopropenylacetate                                | 26.9  | 26.43 |
| Isopropenylacetylene                              | 23.5  | 23.01 |
| Isopropyl (2,4-dichlorophenoxy)acetate            | 63.58 | 62.99 |
| Isopropyl 2-(2,3-dihydroxypropoxy)ethyl thioether | 51.7  | 51.61 |
| Isopropyl 2-chloropropanoate                      | 36.56 | 36.48 |
| Isopropyl 2-furoate                               | 40.24 | 39.4  |
| Isopropyl 3-methylbutanoate                       | 40.59 | 40.9  |

|                                                   |       |       |
|---------------------------------------------------|-------|-------|
| Isopropyl acetoacetate                            | 36.89 | 36.58 |
| Isopropyl benzoate                                | 46.63 | 46.98 |
| Isopropyl butyrate                                | 36.23 | 36.31 |
| Isopropyl chloroacetate                           | 32.94 | 31.85 |
| Isopropyl formate                                 | 22.71 | 22.55 |
| Isopropyl hydroperoxide                           | 20.03 | 19.78 |
| Isopropyl isocyanate                              | 22.9  | 23.04 |
| Isopropyl isopropanethiolsulfinate                | 47.51 | 47.65 |
| Isopropyl lactate                                 | 32.68 | 33.1  |
| Isopropyl laurate                                 | 73.06 | 73.35 |
| Isopropyl methacrylate                            | 36.06 | 36.07 |
| Isopropyl methyl ether                            | 22.47 | 22.33 |
| Isopropyl methyl sulfide                          | 28.61 | 28.36 |
| Isopropyl myristate                               | 82.3  | 82.61 |
| Isopropyl N,N-diethylamino phosphorusoxy chloride | 50.81 | 50.91 |
| Isopropyl N,N-diethylamino phosphorusoxy fluoride | 44.97 | 44.95 |
| Isopropyl nicotinate                              | 45.16 | 44.68 |
| Isopropyl palmitate                               | 92.95 | 91.87 |
| Isopropyl pentanoate                              | 41.3  | 40.94 |
| Isopropyl propionate                              | 31.59 | 31.68 |
| Isopropyl propyl ether                            | 31.81 | 31.62 |
| Isopropyl salicylate                              | 49.94 | 48.75 |
| Isopropyl trichloroacetate                        | 42.17 | 41.77 |
| Isopropyl trifluoroacetate                        | 28.47 | 27.33 |
| Isopropyl vinyl ether                             | 26.73 | 26.29 |
| Isopropylacetate                                  | 26.97 | 27.05 |
| Isopropylamine                                    | 19.6  | 19.39 |
| Isopropylcyclohexane                              | 41.55 | 41.59 |
| Isopropylcyclopentane                             | 37.01 | 36.96 |
| Isopropylcyclopropane                             | 28.53 | 27.7  |
| Isopropylisopropoxyphosphinic chloride            | 40.62 | 40.53 |
| Isopropylmethysilane                              | 30.66 | 30.89 |
| Isopropylnitrate                                  | 24.16 | 23.66 |
| Isopropylphenylether                              | 42.4  | 42.34 |
| Isopropylphenylphosphinic chloride                | 50.67 | 49.73 |
| Isopropylphosphonyl difluoride                    | 23.55 | 23.76 |
| Isopropylpropoxyphosphinic chloride               | 40.67 | 40.52 |
| Isopropylsulfinyl chloride                        | 29.81 | 30.37 |
| Isopropylsulfonic acid                            | 27.2  | 26.64 |
| Isopropylsulfonyl fluoride                        | 25.75 | 25.64 |
| Isopropylthioacetate                              | 33.01 | 33.54 |
| Isopropyltriisothiocyanatosilane                  | 69.52 | 69.15 |

|                                                |        |        |
|------------------------------------------------|--------|--------|
| Isopropyltrimethylsilane                       | 38.47  | 39.58  |
| Isopulegol                                     | 47.44  | 47.4   |
| Isopulegol acetate                             | 57.75  | 57     |
| Isoquinaldine                                  | 46.03  | 47.16  |
| Isoquinoline                                   | 41.31  | 42.18  |
| Isovaleraldehyde                               | 25.61  | 25.77  |
| Isovaleronitrile                               | 25.05  | 25.04  |
| Isoxazole                                      | 16.54  | 16.8   |
| Jasmone                                        | 51.01  | 50.94  |
| Ketene                                         | 11.1   | 11.33  |
| Lactonitrile                                   | 17.67  | 17.24  |
| L-Alanine 1-methylethyl ester dodecyl sulfate  | 102.88 | 103.3  |
| L-Alanine 2-methylpropyl ester dodecyl sulfate | 107.4  | 107.88 |
| Lauric acid                                    | 58.2   | 59.3   |
| Laurocapram                                    | 86.32  | 87.1   |
| Laurnitrile                                    | 57.55  | 57.49  |
| Linalool                                       | 48.81  | 49.36  |
| Linalyl acetate                                | 58.49  | 58.96  |
| Linoleic acid                                  | 86.71  | 86.68  |
| L-Menthone                                     | 46.34  | 46.45  |
| Longifolene                                    | 64.93  | 64.77  |
| L-Proline 1-methylethyl ester dodecyl sulfate  | 110.32 | 110.58 |
| Lupeol                                         | 130.68 | 131.22 |
| L-Valine 1-methylethyl ester dodecyl sulfate   | 112.65 | 112.52 |
| m-Anisidine                                    | 37.36  | 37.11  |
| Margaric acid                                  | 82.58  | 82.45  |
| m-Cresol                                       | 32.82  | 33.1   |
| m-Cresylacetate                                | 42.19  | 42.55  |
| Mecrylate                                      | 26.75  | 26.56  |
| Menthol                                        | 47.4   | 47.6   |
| Menthone                                       | 46.32  | 46.45  |
| Menthyl isovalerate                            | 70.96  | 71.05  |
| Menthylacetate                                 | 57.68  | 57.2   |
| Mercaptoacetic acid                            | 20.72  | 20.67  |
| Mesoxalic acid diethylester oxime              | 43.37  | 42.36  |
| Metasystox                                     | 57.04  | 57.44  |
| Methacrolein                                   | 20.87  | 20.94  |
| Methacryloyl chloride                          | 25.52  | 25.88  |
| Methanesulfonic acid                           | 16.82  | 17.18  |
| Methanesulfonylchloride                        | 21.08  | 20.4   |
| Methanol                                       | 8.23   | 8.15   |
| Metharbital                                    | 47.46  | 48.1   |

|                                          |       |       |
|------------------------------------------|-------|-------|
| Methoxy(methoxymethoxy)methane           | 25.6  | 25.23 |
| Methoxyacetaldehyde                      | 17.67 | 18.21 |
| Methoxyacetic acid                       | 19.24 | 19.29 |
| Methoxyacetonitrile                      | 17.47 | 17.48 |
| Methoxyacetyl chloride                   | 23.13 | 23.15 |
| Methoxyacetylene                         | 16.22 | 15.75 |
| Methoxydichloromethylsulfenyl chloride   | 36.13 | 36.16 |
| Methoxytriethylsilane                    | 44.49 | 44.72 |
| Methoxytrimethylsilane                   | 30.8  | 31.01 |
| Methoxytripropylsilane                   | 58.64 | 58.61 |
| Methyl (Z) 9-octadecenoate               | 91.56 | 91.63 |
| Methyl 10-undecenoate                    | 58.71 | 59.11 |
| Methyl 1-naphthoate                      | 55.43 | 55.64 |
| Methyl 1-naphthylacetate                 | 59.77 | 60.27 |
| Methyl 2,3-dibromopropanoate             | 38.21 | 37.91 |
| Methyl 2-benzoylbenzoate                 | 68.21 | 67.32 |
| Methyl 2-chloroacrylate                  | 26.82 | 26.99 |
| Methyl 2-furoate                         | 30.72 | 30.1  |
| Methyl 2-hydroxy-3-methylbenzoate        | 44.31 | 44.26 |
| Methyl 2-hydroxy-5-methylbenzoate        | 44.33 | 44.26 |
| Methyl 2-methoxybenzoate                 | 44.64 | 44.2  |
| Methyl 2-methylacetoacetate              | 31.97 | 31.87 |
| Methyl 2-naphthaleneacetate              | 60.02 | 60.27 |
| Methyl 2-octynoate                       | 44.44 | 44.03 |
| Methyl 2-thiophenecarboxylate            | 36.43 | 36.15 |
| Methyl 3-(methylthio)propanoate          | 34.45 | 34.72 |
| Methyl 3,3-dimethylacrylate              | 31.71 | 31.51 |
| Methyl 3-butenolate                      | 26.3  | 26.7  |
| Methyl 3-chlorobutyrate                  | 31.05 | 31.77 |
| Methyl 3-cyclohexene-1-carboxylate       | 37.97 | 38.52 |
| Methyl 3-hexenoate                       | 35.81 | 36.07 |
| Methyl 3-mercaptopropanoate              | 30.56 | 30.05 |
| Methyl 3-methoxybenzoate                 | 44.84 | 44.2  |
| Methyl 3-methoxypropanoate               | 28.43 | 28.67 |
| Methyl 3-methylbutyrate                  | 31.45 | 31.6  |
| Methyl 4-bromo-2-butenolate              | 35.22 | 34.55 |
| Methyl 4-bromobutanoate                  | 35.2  | 34.75 |
| Methyl 4-chlorobutyrate                  | 31.38 | 31.81 |
| Methyl 4-chlorophenylphosphinic chloride | 45.62 | 45.35 |
| Methyl 5-bromovalerate                   | 39.42 | 39.38 |
| Methyl abietate                          | 93.84 | 94.25 |
| Methyl acetate                           | 17.56 | 17.75 |

|                                                |       |       |
|------------------------------------------------|-------|-------|
| Methyl acrylate                                | 22.08 | 22.07 |
| Methyl benzenesulfonate                        | 40.8  | 41.06 |
| Methyl benzoate                                | 37.97 | 37.68 |
| Methyl benzoylacetate                          | 48.06 | 47.21 |
| Methyl bis(2,2-diethylhydrazino)silane         | 67.18 | 67.32 |
| Methyl bis(2,2-dimethylhydrazino)silane        | 48.8  | 48.96 |
| Methyl bis(2-chloropropoxy)silane              | 55.37 | 55.46 |
| Methyl bis(diethylamino)silane                 | 59.99 | 59.72 |
| Methyl bromoacetate                            | 25.24 | 25.49 |
| Methyl but-3-yne- 1-carboxylate                | 29.32 | 29.6  |
| Methyl carbamate                               | 16.46 | 16.14 |
| Methyl cellosolve                              | 19.33 | 19.1  |
| Methyl chlorocarbonate                         | 18.18 | 18.14 |
| Methyl chlorofluorophosphate                   | 20.71 | 20.7  |
| Methyl chlorooxoacetate                        | 23.23 | 23.21 |
| Methyl crotonate                               | 27.06 | 26.81 |
| Methyl cyclobutanecarboxylate                  | 29.71 | 29.46 |
| Methyl cyclohexanecarboxylate                  | 37.9  | 38.72 |
| Methyl cyclopropanecarboxylate                 | 25.43 | 24.83 |
| Methyl decanoate                               | 54.67 | 54.79 |
| Methyl dichloroacetate                         | 27.51 | 27.41 |
| Methyl dimethylmalonate                        | 37.73 | 37.97 |
| Methyl formate                                 | 13.03 | 13.25 |
| Methyl hexanoate                               | 36.06 | 36.27 |
| Methyl hydrocinnamate                          | 46.52 | 46.94 |
| Methyl isoamyl ketone                          | 34.47 | 34.78 |
| Methyl isobutanoate                            | 26.81 | 26.97 |
| Methyl isonicotinate                           | 35.57 | 35.38 |
| Methyl laurate                                 | 63.88 | 64.05 |
| Methyl levulinate                              | 31.55 | 31.91 |
| Methyl linolenate                              | 91.32 | 91.23 |
| Methyl methacrylate                            | 26.69 | 26.77 |
| Methyl methanesulfonate                        | 21.25 | 20.68 |
| Methyl methanethiosulfinate                    | 28.79 | 28.73 |
| Methyl methoxyacetate                          | 23.81 | 24.04 |
| Methyl N,N-diethylamino phosphorusoxy chloride | 41.57 | 41.71 |
| Methyl N,N-diethylamino phosphorusoxy fluoride | 36.06 | 35.75 |
| Methyl nonanoate                               | 49.69 | 50.16 |
| Methyl octadecanoate                           | 91.97 | 91.83 |
| Methyl octanoate                               | 45.35 | 45.53 |
| Methyl pentadecanoate                          | 77.9  | 77.94 |
| Methyl pentafluoropropanoate                   | 22.99 | 23.04 |



|                                         |       |       |
|-----------------------------------------|-------|-------|
| Methyl pentyl sulfide                   | 37.73 | 37.63 |
| Methyl perfluorobutanoate               | 28.32 | 28.05 |
| Methyl perfluorooctanoate               | 48.12 | 48.09 |
| Methyl phenoxyacetate                   | 43.64 | 44.05 |
| Methyl phenylacetate                    | 42.11 | 42.31 |
| Methyl pivalate                         | 30.94 | 31.62 |
| Methyl propanoate                       | 22.17 | 22.38 |
| Methyl propenyl ketone                  | 25.45 | 25.36 |
| Methyl propyl disulfide                 | 37.18 | 36.57 |
| Methyl propyl sulfide                   | 28.45 | 28.37 |
| Methyl pyruvate                         | 21.66 | 22.65 |
| Methyl t-butyl disulfide                | 41.45 | 41.57 |
| Methyl tert-pentyl sulfide              | 38.34 | 37.61 |
| Methyl tetradecanoate                   | 73.27 | 73.31 |
| Methyl tiglate                          | 31.99 | 31.51 |
| Methyl t-pentyl ether                   | 31.35 | 31.53 |
| Methyl trichloroacetate                 | 32.5  | 32.47 |
| Methyl trichloromethyl ether            | 28.09 | 27.56 |
| Methyl tridecanoate                     | 68.67 | 68.68 |
| Methyl trifluoroacetate                 | 18.15 | 18.03 |
| Methyl tris(2,2-diethylhydrazino)silane | 92.26 | 92.24 |
| Methyl undecanoate                      | 59.28 | 59.42 |
| Methyl valerate                         | 31.5  | 31.64 |
| Methyl vinyl ether                      | 17.13 | 16.99 |
| Methyl Z,Z-9,12-octadecadieneoate       | 91.41 | 91.43 |
| Methyl-1chloroethylether                | 23.17 | 22.61 |
| Methylacetamide                         | 19.73 | 19.46 |
| Methylacetoacetate                      | 27.21 | 27.28 |
| Methylamine                             | 10.12 | 10.24 |
| Methylbenzene                           | 31.06 | 31.33 |
| Methylbutylphosphinic chloride          | 35.01 | 35.02 |
| Methylchloroacetate                     | 22.3  | 22.55 |
| Methylchloroform                        | 26.15 | 26.12 |
| Methylconiine                           | 45.93 | 45.46 |
| Methylcyanoacetate                      | 22.23 | 22.17 |
| Methylcyclobutane                       | 23.96 | 23.11 |
| Methylcyclohexane                       | 32.5  | 32.37 |
| Methylcyclohexyldifluorosilane          | 39.68 | 39.69 |
| Methylcyclohexylether                   | 34.06 | 34.08 |
| Methylcyclopentane                      | 27.84 | 27.74 |
| Methylcyclopropylketone                 | 23.95 | 23.38 |
| Methyldibutoxysilane                    | 54.87 | 55.2  |

|                                                   |       |       |
|---------------------------------------------------|-------|-------|
| Methyldichloro-2-(2,4-dichlorophenoxy)ethylsilane | 70.31 | 70.12 |
| Methyldichloro-2-(4-chlorophenoxy)ethylsilane     | 65.49 | 65.3  |
| Methyldichloro-2,4-dichlorophenoxyethylsilane     | 60.94 | 60.2  |
| Methyldichloro-2-butoxyethylsilane                | 55.11 | 54.39 |
| Methyldichloro-2-isobutoxyethylsilane             | 54.52 | 54.35 |
| Methyldichloro-2-phenoxyethylsilane               | 60.39 | 60.48 |
| Methyldichloro-4-chlorophenoxyethylsilane         | 55.08 | 55.38 |
| Methyldichlorobutoxyethylsilane                   | 44.66 | 44.64 |
| Methyldichlorophenoxyethylsilane                  | 50.14 | 50.56 |
| Methyldiethyl-2-phenoxyethylsilane                | 70.07 | 70.34 |
| Methyldiethylphenoxyethylsilane                   | 60.29 | 59.99 |
| Methylelaidate                                    | 91.5  | 91.63 |
| Methylenanthate                                   | 40.99 | 40.9  |
| Methylenebis(4-cyclohexylisocyanate)              | 72.02 | 71.99 |
| Methylenecyclobutane                              | 23.34 | 22.91 |
| Methylenecyclohexane                              | 32.15 | 32.17 |
| Methylenecyclopentane                             | 27.55 | 27.54 |
| Methylethylphosphinic chloride                    | 25.96 | 25.76 |
| Methylhydroperoxide                               | 10.75 | 10.48 |
| Methylisobutylphosphinic chloride                 | 35.12 | 34.98 |
| Methylisocyanate                                  | 13.02 | 13.89 |
| Methylisopropylphosphinic chloride                | 29.87 | 30.46 |
| Methylisothiocyanate                              | 20.98 | 21.45 |
| Methyl lactate                                    | 23.81 | 23.8  |
| Methylnitrate                                     | 14.6  | 14.36 |
| Methylnonylphenylsilane                           | 82.9  | 82.53 |
| Methyl-n-pentylether                              | 31.64 | 31.58 |
| Methyl-n-propylketone                             | 25.21 | 25.56 |
| Methyloctylphenylsilane                           | 78.18 | 77.9  |
| Methyloxiran                                      | 15.15 | 15.59 |
| Methylphenyldifluorosilane                        | 38.26 | 38.57 |
| Methylphenylphosphinic chloride                   | 40.13 | 40.53 |
| Methylphenylsilane                                | 40.82 | 41.52 |
| Methylphosphonic acid dimethyl ester              | 26.3  | 26.63 |
| Methylphosphonyl difluoride                       | 14.65 | 14.56 |
| Methylphosphoric acid ethylester                  | 26.93 | 26.24 |
| Methylpropylether                                 | 22.12 | 22.32 |
| Methylpropylphosphinic chloride                   | 30.38 | 30.39 |
| Methylpropylsilane                                | 30.73 | 30.84 |
| Methylsalicylate                                  | 40.11 | 39.45 |
| Methylsilanetriol triacetate                      | 46.27 | 46.27 |
| Methylsulfinyl chloride                           | 21.28 | 20.91 |

|                                                     |        |        |
|-----------------------------------------------------|--------|--------|
| Methylsulfonyl fluoride                             | 15.94  | 16.18  |
| Methylthiirane                                      | 22.06  | 21.8   |
| Methylthiocyanate                                   | 19     | 19.06  |
| Methyltri(2-octyloxy)silane                         | 129.85 | 129.97 |
| Methyltributoxysilane                               | 74.39  | 74.38  |
| Methyltrichlorosilane                               | 29.13  | 29.44  |
| Methyltriheptyloxysilane                            | 116.01 | 116.05 |
| Methyltrihexyloxysilane                             | 102.11 | 102.16 |
| Methyltriisopentyloxysilane                         | 88.26  | 88.15  |
| Methyltripentyloxysilane                            | 88.2   | 88.27  |
| Methyltriphenoxysilane                              | 91.85  | 92.14  |
| Methylvinylchlorosilane                             | 33.33  | 33.8   |
| Monoamyl adipate                                    | 56.66  | 56.42  |
| Monobutyl adipate                                   | 51.88  | 51.79  |
| Monobutyl succinate                                 | 42.44  | 42.53  |
| Monoethyl adipate                                   | 42.53  | 42.53  |
| Monohexyl adipate                                   | 61.65  | 61.05  |
| Monomethyl adipate                                  | 37.71  | 37.87  |
| Monomethyl glutarate                                | 32.82  | 33.24  |
| Monopropyl adipate                                  | 47.15  | 47.16  |
| Montanic acid                                       | 134.31 | 133.38 |
| Morpholine                                          | 23.62  | 23.58  |
| Morpholinium formate                                | 32.2   | 32.26  |
| MTBE                                                | 26.69  | 26.9   |
| m-Toluidine                                         | 35.45  | 35.4   |
| Muscone                                             | 73.48  | 74.31  |
| Mustard gas                                         | 38.65  | 38.18  |
| Mustard oil                                         | 30.28  | 30.36  |
| Myrcene                                             | 47.63  | 47.76  |
| Myristicin                                          | 52.85  | 52.91  |
| Myristonitrile                                      | 66.53  | 66.75  |
| N-(1,1-Dimethylpropyl)aminotriethylsilane           | 64.79  | 65.18  |
| N-(1-Naphthyl)ethylenediamine                       | 62.08  | 61.48  |
| N-(2',3'-Epoxypropyl)-N-methylpyrrolidonium acetate | 55.5   | 54.46  |
| N-(2-Aminoethyl)ethanolamine                        | 29.09  | 28.87  |
| N-(2-Hydroxyethyl)-2-furfurylamine                  | 37.35  | 37.79  |
| N-(2-Hydroxypropyl)-2-furfurylamine                 | 42.23  | 42.43  |
| N-(2-Pyridinylmethyl)-2-pyridinemethanamine         | 59.52  | 59.63  |
| N-(3-(Trimethoxysilyl)propyl)-1,2-ethanediamine     | 58.21  | 57.88  |
| N-(3-Aminopropyl)-N-methyl-1,3-propanediamine       | 44.95  | 45.27  |
| N-(Hydroxyethyl)piperazine                          | 36.49  | 36.38  |
| N,N,N',N'-Tetraethyl-1,2-ethylenediamine            | 55.57  | 56.08  |

|                                          |       |       |
|------------------------------------------|-------|-------|
| N,N,N',N'-Tetramethyl-1,6-hexanediamine  | 55.89 | 56.24 |
| N,N-Bis(2-hydroxyethyl)butylamine        | 45.83 | 45.82 |
| N,N-Bis(2-hydroxyethyl)ethylamine        | 36.42 | 36.56 |
| N,N'-Dibenzyl-1,2-ethanediamine          | 76.29 | 76.52 |
| N,N-Dibutylaminotriethylsilane           | 78.65 | 79.32 |
| N,N-Dibutylaniline                       | 68.92 | 68.24 |
| N,N-Dibutyl-difluoroacetamide            | 52.39 | 52.09 |
| N,N'-Diethyl-1,2-ethanediamine           | 36.55 | 36.66 |
| N,N-Diethyl-1,3-propanediamine           | 42    | 41.8  |
| N,N-Diethyl-1-naphthalenamine            | 66.95 | 67.68 |
| N,N-Diethyl-3-methylbutanamide           | 47.5  | 47.53 |
| N,N-Diethylaminotriethylsilane           | 60.99 | 60.8  |
| N,N-Diethylaniline                       | 50.38 | 49.72 |
| N,N-Diethylbutanamide                    | 42.52 | 42.94 |
| N,N-Diethylformamide                     | 28.9  | 29.19 |
| N,N-Diethylhydroxylamine                 | 25.99 | 25.9  |
| N,N-Diethylpropanamide                   | 38.14 | 38.31 |
| N,N'-Diethylurea                         | 30.64 | 31.17 |
| N,N-Diisobutylaminotriethylsilane        | 78.67 | 79.24 |
| N,N-Dimethyl-1,2-ethanediamine           | 28.13 | 27.99 |
| N,N-Dimethyl-1-naphthylamine             | 58.01 | 58.5  |
| N,N-Dimethyl-3-toluidine                 | 45.72 | 45.35 |
| N,N-Dimethylacrylamide                   | 28.91 | 28.82 |
| N,N-Dimethylaniline                      | 40.89 | 40.54 |
| N,N-Dimethylbenzylamine                  | 44.54 | 44.49 |
| N,N-Dimethylbutyramide                   | 33.43 | 33.76 |
| N,N-Dimethylcyclohexylamine              | 40.58 | 40.87 |
| N,N-Dimethylethanolamine                 | 25.97 | 25.97 |
| N,N-Dimethylformamide                    | 20.01 | 20.01 |
| N,N-Dimethyl-N'-benzyl-1,2-ethanediamine | 56.97 | 57.12 |
| N,N-Dimethylpentanamide                  | 38.14 | 38.39 |
| N,N-Dimethylpropionamide                 | 28.92 | 29.13 |
| N,N-Dimethyl-p-toluidine                 | 45.06 | 45.35 |
| N,N-Dipropylaniline                      | 59.88 | 58.98 |
| N-Acetyethanolamine                      | 25.85 | 25.46 |
| N-Acetyl-N-methylacetamide               | 29.03 | 28.97 |
| N-Allylaniline                           | 44.43 | 44.41 |
| n-Amyl ether                             | 50.27 | 50.13 |
| N-Benzyl-2-methylaniline                 | 65.29 | 64.83 |
| N-Benzyl-N-ethylhydroxylamine            | 45.76 | 45.83 |
| n-Butyl acetate                          | 31.49 | 31.67 |
| n-Butyl acrylate                         | 36.34 | 35.99 |

|                                                                  |        |        |
|------------------------------------------------------------------|--------|--------|
| n-Butyl methyl ether                                             | 27.21  | 26.95  |
| n-Butyl-2-chloropropanoate                                       | 41.17  | 41.06  |
| n-Butyl-3-chloropropanoate                                       | 41.19  | 41.1   |
| N-Butyl-3-methylpyridinium<br>bis(trifluoromethylsulfonyl)amide  | 80.49  | 81.06  |
| N-Butyl-3-methylpyridinium<br>trifluoromethanesulfonate          | 64.26  | 64.25  |
| N-Butyl-4-methylthiazolium<br>bis(trifluoromethylsulfonyl) amide | 78.68  | 79.25  |
| N-Butyl-4-methylthiazolium difluoro(oxalato)borate               | 63.24  | 63.32  |
| N-Butylaniline                                                   | 49.77  | 49.35  |
| n-Butylbenzoate                                                  | 51.89  | 51.6   |
| n-Butylchloroacetate                                             | 36.32  | 36.47  |
| n-Butyldichloroacetate                                           | 41.42  | 41.33  |
| N-Butyl-difluoroacetamide                                        | 34.05  | 33.2   |
| n-Butylethylether                                                | 31.71  | 31.61  |
| n-Butylformate                                                   | 26.95  | 27.17  |
| n-Butylmethacrylate                                              | 40.61  | 40.69  |
| n-Butylmethylsulfide                                             | 33.09  | 33     |
| n-Butylnitrite                                                   | 26.83  | 26.76  |
| N-Butyl-N-methylmorpholinium N-acetylalaninate                   | 74.32  | 74.63  |
| N-Butyl-N-methylmorpholinium N-acetylleucinate                   | 88.43  | 88.48  |
| N-Butyl-N-methylmorpholinium N-acetylvalinate                    | 83.98  | 83.85  |
| n-Butylnonanoate                                                 | 64.49  | 64.08  |
| N-Butyl-N-phenylacetamide                                        | 58.15  | 58.86  |
| N-Butylpiperidine                                                | 45.75  | 45.49  |
| N-Butylpyridinium bis(trifluoromethanesulfonyl)<br>amide         | 76.22  | 76.25  |
| N-Butylpyridinium triflate                                       | 59.25  | 59.44  |
| N-Butylpyridinium trifluoroacetate                               | 54.87  | 55.39  |
| N-Butylthiazolium bis(trifluoromethylsulfonyl) amide             | 73.89  | 74.63  |
| N-Butylthiazolium difluoro(oxalato)borate                        | 58.43  | 58.7   |
| n-Butyltrichloroacetate                                          | 46.38  | 46.39  |
| n-Crotylacetate                                                  | 31.3   | 31.47  |
| N-Cyclohexylaniline                                              | 55.89  | 56.4   |
| n-Decanoic acid                                                  | 50.12  | 50.04  |
| n-Decyl alcohol                                                  | 50     | 49.85  |
| n-Decylacetate                                                   | 59.35  | 59.45  |
| n-Decylamine                                                     | 51.92  | 51.87  |
| N-Decylpyridinium bis(trifluoromethanesulfonyl)<br>amide         | 104.52 | 104.03 |
| n-Dodecanal                                                      | 57.59  | 58.22  |
| n-Dodecylamine                                                   | 61.2   | 61.13  |

|                                                              |        |        |
|--------------------------------------------------------------|--------|--------|
| n-Dodecylmercaptan                                           | 65.55  | 65.37  |
| N-Dodecylpyridinium bis(trifluoromethanesulfonyl) amide      | 113.68 | 113.29 |
| Neohexane                                                    | 30.16  | 29.9   |
| Neomenthol                                                   | 47.72  | 47.6   |
| Neopentylbenzene                                             | 49.81  | 49.83  |
| Neopentylidenebromide                                        | 40.83  | 40.55  |
| Neral                                                        | 49.5   | 48.7   |
| Nerol                                                        | 49.56  | 49.59  |
| N-Ethyl-1,2-ethanediamine                                    | 27.68  | 27.46  |
| N-Ethyl-1-naphthalenamine                                    | 58.47  | 58.05  |
| N-Ethyl-1-propanamine                                        | 28.41  | 28.66  |
| N-Ethyl-2-methylallylamine                                   | 33.48  | 33.05  |
| N-Ethyl-2-methylaniline                                      | 45.13  | 44.9   |
| N-Ethyl-2-methylpyridinium bis(trifluoromethylsulfonyl)amide | 71.54  | 71.54  |
| N-Ethylaniline                                               | 40.46  | 40.09  |
| N-Ethylbenzaldehydeimine                                     | 44.45  | 43.96  |
| N-Ethylformamide                                             | 19.85  | 19.56  |
| N-Ethylmorpholine                                            | 33.74  | 33.29  |
| N-Ethylmorpholinium formate                                  | 41.07  | 41.68  |
| N-Ethyl-N-methylmorpholinium N-acetylalaninate               | 65.23  | 65.37  |
| N-Ethyl-N-methylmorpholinium N-acetylisoleucinate            | 78.62  | 79.22  |
| N-Ethyl-N-methylmorpholinium N-acetylleucinate               | 78.65  | 79.22  |
| N-Ethyl-N-methylmorpholinium N-acetylvalinate                | 74.01  | 74.59  |
| N-Fenchylaminotriethylsilane                                 | 83.74  | 83.97  |
| n-Heptaldehyde                                               | 34.89  | 35.07  |
| n-Heptylacetate                                              | 45.29  | 45.56  |
| n-Heptylamine                                                | 38     | 37.98  |
| n-Heptylformate                                              | 41.03  | 41.06  |
| n-Heptylnitrite                                              | 39.66  | 40.65  |
| n-Hexanoic acid                                              | 31.66  | 31.52  |
| n-Hexylacetate                                               | 40.63  | 40.93  |
| n-Hexylamine                                                 | 33.29  | 33.35  |
| n-Hexylformate                                               | 36.37  | 36.43  |
| N-Hexyl-N-methylmorpholinium N-acetylalaninate               | 83.42  | 83.89  |
| N-Hexyl-N-methylmorpholinium N-acetylleucinate               | 97.24  | 97.74  |
| N-Hexyl-N-methylmorpholinium N-acetylvalinate                | 92.26  | 93.11  |
| Nikethamide                                                  | 51.53  | 51.31  |
| N-Isobutyl-3-sulfopropan-1-aminium hydrogen sulfate          | 62.85  | 62.71  |
| N-Isobutylaniline                                            | 49.26  | 49.31  |
| N-Isopropylaminotriethylsilane                               | 56.05  | 55.92  |

|                                                                                      |       |       |
|--------------------------------------------------------------------------------------|-------|-------|
| N-Isopropylaniline                                                                   | 44.4  | 44.65 |
| Nitrobenzene                                                                         | 32.89 | 33.19 |
| Nitrocyclohexane                                                                     | 33.42 | 33.26 |
| Nitroethane                                                                          | 17.1  | 17.14 |
| Nitroisobutane                                                                       | 26.33 | 26.36 |
| Nitromethane                                                                         | 12.48 | 12.82 |
| Nitrophenylmethane                                                                   | 36.66 | 37.07 |
| N-Methyl-1,2-ethylenediamine                                                         | 23.21 | 22.87 |
| N-Methyl-2-furanmethanamine                                                          | 31.52 | 31.79 |
| N-Methyl-2-pyrrolidone                                                               | 26.96 | 26.95 |
| N-Methylalanine ethylester                                                           | 34.58 | 35.01 |
| N-Methylaniline                                                                      | 35.46 | 35.5  |
| N-Methylbenzaldehydeimine                                                            | 39.41 | 39.37 |
| N-Methylbenzeneethanamine                                                            | 43.93 | 44    |
| N-Methylcyclohexylamine                                                              | 35.53 | 35.75 |
| N-Methyldiphenylamine                                                                | 61.39 | 61.05 |
| N-Methylformamide                                                                    | 15.15 | 14.97 |
| N-Methylformanilide                                                                  | 39.86 | 40.52 |
| N-Methylmorpholine                                                                   | 29.06 | 28.7  |
| N-Methyl-m-toluidine                                                                 | 40.31 | 40.31 |
| N-Methyl-N-(2,3-dihydroxypropyl)pyrrolidinium<br>bis(trifluoromethanesulfonyl) amide | 74.88 | 75.07 |
| N-Methyl-N-phenyl-difluoroacetamide                                                  | 44.53 | 44.9  |
| N-Methyl-o-toluidine                                                                 | 40.65 | 40.31 |
| N-Methylpiperidine                                                                   | 31.75 | 31.64 |
| N-Methylpropargylamine                                                               | 21.94 | 22.03 |
| N-Methylpropionamide                                                                 | 24.41 | 24.09 |
| N-Methylpyrrolidine                                                                  | 26.57 | 27.01 |
| N-Nitrosodibutylamine                                                                | 46.97 | 47.06 |
| N-Nitrosodiethylamine                                                                | 28.49 | 28.54 |
| N-Nitrosodihexylamine                                                                | 65.54 | 65.58 |
| N-Nitrosodimethylamine                                                               | 19.31 | 19.36 |
| N-Nitrosodipentylamine                                                               | 56.2  | 56.32 |
| N-Nitrosodipropylamine                                                               | 37.72 | 37.8  |
| N-Nitroso-N-methyl-N-butylamine                                                      | 33.21 | 33.21 |
| N-Nitroso-N-methyl-N-isobutylamine                                                   | 33.25 | 33.17 |
| N-Nitroso-N-methyl-N-isopropylamine                                                  | 28.49 | 28.51 |
| N-Nitroso-N-methyl-N-propylamine                                                     | 28.55 | 28.58 |
| N-Nitrosopiperidine                                                                  | 31.22 | 31.03 |
| N-Nitrosopyrrolidine                                                                 | 26.59 | 26.4  |
| n-Nonanal                                                                            | 44.22 | 44.33 |
| n-Nonylamine                                                                         | 47.28 | 47.24 |

|                                                                  |        |        |
|------------------------------------------------------------------|--------|--------|
| n-Nonylformate                                                   | 50.86  | 50.32  |
| n-Nonylmercaptan                                                 | 51.64  | 51.48  |
| n-Octanoic acid                                                  | 40.94  | 40.78  |
| N-Octyl-2-pyrrolidone                                            | 59.22  | 59.32  |
| n-Octylacetate                                                   | 49.56  | 50.19  |
| n-Octylamine                                                     | 42.59  | 42.61  |
| n-Octylformate                                                   | 45.87  | 45.69  |
| N-Octyl-N-methylmorpholinium N-acetylalaninate                   | 92.82  | 93.15  |
| N-Octyl-N-methylmorpholinium N-acetylvalinate                    | 102.12 | 102.37 |
| Nonacosane                                                       | 136.67 | 136.41 |
| Nonadecane                                                       | 90.26  | 90.11  |
| Nonadecylbenzene                                                 | 114.71 | 114.67 |
| Nonane                                                           | 43.88  | 43.81  |
| Nonanedinitrile                                                  | 43.61  | 43.39  |
| Nonanedioic acid                                                 | 47.1   | 47.01  |
| Nonanedioyl dichloride                                           | 54.75  | 54.73  |
| Nonyl acetate                                                    | 54.34  | 54.82  |
| Nonyl thiocyanate                                                | 56.35  | 56.31  |
| Nonylbenzene                                                     | 67.82  | 68.37  |
| Nonylcyclohexane                                                 | 69.52  | 69.41  |
| Nonylcyclopentane                                                | 64.89  | 64.78  |
| Nonyloxytrimethylsilane                                          | 68.07  | 68.08  |
| Nopinene                                                         | 44.75  | 43.82  |
| Norcarane                                                        | 30.67  | 30.19  |
| Nornicotine                                                      | 43.16  | 44.08  |
| Norpempidine                                                     | 44.98  | 44.9   |
| Novoldiamine                                                     | 51.54  | 50.99  |
| n-Pentyl-2-mercaptan                                             | 33.06  | 32.95  |
| N-Phenylethanolamine                                             | 41.48  | 41.5   |
| N-Phenyl-N-benzylbenzenemethanamine                              | 90.33  | 89.58  |
| N-Phenylpiperidine                                               | 52.42  | 52.21  |
| n-Propyl acetate                                                 | 26.91  | 27.04  |
| n-Propyl benzoate                                                | 47.21  | 46.97  |
| n-Propyl iodide                                                  | 28.87  | 28.91  |
| n-Propyl trifluoacetate                                          | 27.7   | 27.32  |
| N-Propyl-2-methylpyridinium<br>bis(trifluoromethylsulfonyl)amide | 76.28  | 76.17  |
| N-Propylaminotriethylsilane                                      | 56.11  | 55.99  |
| N-Propylaniline                                                  | 45.12  | 44.72  |
| n-Propylbromoacetate                                             | 34.57  | 34.78  |
| n-Propylchloroacetate                                            | 31.71  | 31.84  |
| n-Propylformate                                                  | 22.34  | 22.54  |



|                                                 |        |        |
|-------------------------------------------------|--------|--------|
| n-Propyliodoacetate                             | 39.72  | 39.92  |
| n-Propylmethacrylate                            | 35.88  | 36.06  |
| n-Propylnitrate                                 | 24.03  | 23.65  |
| N-Propyl-N-methylmorpholinium N-acetylalaninate | 69.57  | 70     |
| N-Propyl-N-methylmorpholinium N-acetylleucinate | 83.88  | 83.85  |
| N-Propyl-N-methylmorpholinium N-acetylvalinate  | 79.02  | 79.22  |
| n-Propylvinylacetate                            | 35.65  | 35.99  |
| N-t-Butylaminotriethylsilane                    | 60.63  | 60.55  |
| N-t-Butylbenzylamine                            | 53.26  | 53.15  |
| n-Undecanoic acid                               | 53.96  | 54.67  |
| n-Undecylamine                                  | 56.57  | 56.5   |
| n-Undecylmercaptan                              | 60.9   | 60.74  |
| n-Valeraldehyde                                 | 25.48  | 25.81  |
| O,O-Dibutyl butylphosphorus thioxide            | 75.82  | 76.28  |
| O,O-Dibutylthiophosphoric acid                  | 58.56  | 58.39  |
| O,O-Diethyl butylphosphorus thioxide            | 57.8   | 57.76  |
| O,O-diethyl ethylthiophosphinate                | 48.38  | 48.5   |
| O,O-Diethyl propylphosphorus thioxide           | 52.96  | 53.13  |
| O,O-Diethylthiophosphoric acid                  | 40.47  | 39.87  |
| O,O-Diisobutylthiophosphoric acid               | 58.85  | 58.31  |
| O,O-Diisopropylthiophosphoric acid              | 49.75  | 49.15  |
| O,O-Dimethylthiophosphoric acid                 | 31.12  | 30.55  |
| O,O-Dipropyl butylphosphorus thioxide           | 66.92  | 67.02  |
| O,O-Dipropyl propylphosphorus thioxide          | 62.33  | 62.39  |
| O,O-Dipropylthiophosphoric acid                 | 50.02  | 49.13  |
| O,S-Dimethyldithiocarbonate                     | 33.91  | 33.91  |
| o-Cresol                                        | 32.96  | 33.1   |
| o-Cresylacetate                                 | 41.95  | 42.55  |
| Octadecamethyloctasiloxane                      | 160.19 | 160.85 |
| Octadecane                                      | 86.18  | 85.48  |
| Octadecanoyl chloride                           | 91.17  | 90.94  |
| Octadecyl perfluorobutyrate                     | 107.74 | 106.79 |
| Octadecylbenzene                                | 110.29 | 110.04 |
| Octadecylcyclohexane                            | 111.3  | 111.08 |
| Octadecyltrichlorosilane                        | 108.02 | 108.09 |
| Octafluoronaphthalene                           | 44.5   | 43.68  |
| Octahydroindolizine                             | 38.84  | 38.65  |
| Octamethylcyclotetrasiloxane                    | 74.68  | 74.6   |
| Octamethyltrisiloxane                           | 67.44  | 67.6   |
| Octane                                          | 39.15  | 39.18  |
| Octanedioic acid                                | 42.24  | 42.38  |
| Octanoic anhydride                              | 77.97  | 78.01  |

|                                       |       |       |
|---------------------------------------|-------|-------|
| Octanoyl chloride                     | 44.38 | 44.64 |
| Octodrine                             | 42.72 | 42.5  |
| Octyl butanoate                       | 59.57 | 59.45 |
| Octyl nitrite                         | 46.03 | 45.28 |
| Octyl octanoate                       | 78.26 | 77.97 |
| Octyl phenyl ether                    | 65.05 | 65.48 |
| Octyl propanoate                      | 54.66 | 54.82 |
| Octyl thiocyanate                     | 51.68 | 51.68 |
| Octylbenzene                          | 63.65 | 63.74 |
| Octylcyanide                          | 43.58 | 43.6  |
| Octylcyclohexane                      | 64.89 | 64.78 |
| Octylcyclopentane                     | 60.26 | 60.15 |
| Octyloxytrimethylsilane               | 63.43 | 63.45 |
| Octylphosphinic dichloride            | 58.34 | 58.37 |
| o-Cumenol                             | 41.67 | 42.32 |
| O-Ethyl 2-methylpropanoic imino ester | 35.14 | 34.21 |
| O-Ethyl 4-methylpentanoic imino ester | 42.84 | 43.47 |
| O-Ethyl butanoic imino ester          | 34.47 | 34.25 |
| O-Ethyl hexanoic imino ester          | 42.97 | 43.51 |
| O-Ethyl pentanoic imino ester         | 39.37 | 38.88 |
| O-Ethyl propanoic imino ester         | 29.84 | 29.62 |
| O-Hexyl S-propenylxanthate            | 65.68 | 66.25 |
| O-Methyl S-propenylxanthate           | 42.49 | 43.07 |
| Orthoformic acid trimethyl ester      | 25.36 | 25.65 |
| o-Toluenesulfonyl chloride            | 45.82 | 45.59 |
| o-Toluidine                           | 35.34 | 35.4  |
| o-Tolylamino(diethylamino)borane      | 63.48 | 63.31 |
| Oxacyclohexadecan-2-one               | 70.34 | 71.2  |
| Oxalylchloride                        | 22.25 | 22.32 |
| Oxepane                               | 29.66 | 29.47 |
| Oxetane                               | 15.63 | 15.58 |
| Oxirane                               | 11.01 | 10.95 |
| Oxiranecarboxaldehyde                 | 16.21 | 16.11 |
| Palmitic acid                         | 78.39 | 77.82 |
| Paracetamol                           | 42.28 | 42.14 |
| Paramethadione                        | 37.61 | 37.66 |
| Parasorbic acid                       | 29.18 | 29.34 |
| Pargyline                             | 51.39 | 51.67 |
| Patchouli alcohol                     | 66.35 | 66.37 |
| p-Cresol                              | 32.86 | 33.1  |
| p-Cymene                              | 45.34 | 45.36 |
| Pelargonic acid                       | 45.55 | 45.41 |

|                                             |        |        |
|---------------------------------------------|--------|--------|
| Pelletierine                                | 40.81  | 40.61  |
| Pempidine                                   | 49.1   | 50.02  |
| Pentachloroethane                           | 35.57  | 35.78  |
| Pentacosane                                 | 118.09 | 117.89 |
| Pentadecane                                 | 71.62  | 71.59  |
| Pentadecanedioic acid                       | 74.66  | 74.79  |
| Pentadecylamine                             | 75.13  | 75.02  |
| Pentadecylbenzene                           | 96.14  | 96.15  |
| Pentadecylcyclohexane                       | 97.37  | 97.19  |
| Pentaerythritol tetrakis(2-mercaptoacetate) | 99.04  | 99.99  |
| Pentaethylbenzene                           | 73.13  | 73.72  |
| Pentafluoroanisole                          | 32.78  | 32.54  |
| Pentafluorobenzene                          | 26.35  | 26.02  |
| Pentafluorophenol                           | 26.97  | 27.79  |
| Pentamethylbenzene                          | 49.7   | 50.57  |
| Pentane                                     | 25.27  | 25.29  |
| Pentanedinitrile                            | 24.93  | 24.87  |
| Pentanedioic acid                           | 28.34  | 28.49  |
| Pentanedioyl dichloride                     | 35.8   | 36.21  |
| Pentanenitrile                              | 25.01  | 25.08  |
| Pentanoic acid                              | 26.86  | 26.89  |
| Pentanoic anhydride                         | 50.7   | 50.23  |
| Pentasilane                                 | 60.8   | 60.76  |
| Pentyl 1-naphthaleneacetate                 | 78.48  | 78.82  |
| Pentyl 1-naphthoate                         | 74.63  | 74.19  |
| Pentyl 1-naphthylketone                     | 72.78  | 72.71  |
| Pentyl 2-naphthaleneacetate                 | 78.77  | 78.82  |
| Pentyl 2-naphthoate                         | 75.21  | 74.19  |
| Pentyl 2-thiophenecarboxylate               | 55.21  | 54.7   |
| Pentyl benzoate                             | 56.58  | 56.23  |
| Pentyl butyrate                             | 45.22  | 45.56  |
| Pentyl cyclohexyloxy dithiophosphinic acid  | 77.04  | 77     |
| Pentyl dichloro phosphorus oxide            | 43.84  | 43.53  |
| Pentyl dichloro phosphorus thioxide         | 51.63  | 51.84  |
| Pentyl ethoxy dithiophosphinic acid         | 60.64  | 60.61  |
| Pentyl heptanoate                           | 59.56  | 59.45  |
| Pentyl hexanoate                            | 54.77  | 54.82  |
| Pentyl hexyloxy dithiophosphinic acid       | 79.31  | 79.13  |
| Pentyl hydroperoxide                        | 29.05  | 29.03  |
| Pentyl isopropoxy dithiophosphinic acid     | 65.44  | 65.25  |
| Pentyl methoxy dithiophosphinic acid        | 56.13  | 55.95  |
| Pentyl nitrite                              | 31.14  | 31.39  |

|                                      |       |       |
|--------------------------------------|-------|-------|
| Pentyl nonanoate                     | 69.61 | 68.71 |
| Pentyl octanoate                     | 63.79 | 64.08 |
| Pentyl pentanoate                    | 50.09 | 50.19 |
| Pentyl phenyl sulfide                | 58.23 | 58.16 |
| Pentyl propoxy dithiophosphinic acid | 65.56 | 65.24 |
| Pentyl salicylate                    | 58.15 | 58    |
| Pentylcyclohexane                    | 50.97 | 50.89 |
| Pentylcyclopentane                   | 46.32 | 46.26 |
| Pentyldichloroborane                 | 39.49 | 39.4  |
| Pentyloxybenzene                     | 51.64 | 51.59 |
| Pentyloxytrimethylsilane             | 49.52 | 49.56 |
| Pentylphosphinic dichloride          | 44.81 | 44.48 |
| Pentyltrichlorosilane                | 48.79 | 47.9  |
| Peonol                               | 45.39 | 44.52 |
| Perchlorocyclopentadiene             | 52.34 | 52.06 |
| Perchlorocyclopentene                | 61.6  | 61.68 |
| Perfluoro-2-methylpentane            | 31.55 | 31.37 |
| Perfluorobutanoic acid               | 23.87 | 23.3  |
| Perfluorocyclobutene                 | 18.8  | 18.88 |
| Perfluorocyclohexene                 | 28.8  | 28.9  |
| Perfluoroheptane                     | 36.91 | 37.01 |
| Perfluorohexane                      | 31.58 | 32    |
| Perfluoromethylcyclohexane           | 34.93 | 34.44 |
| Perfluorotoluene                     | 31.9  | 31.11 |
| Perfluoro-trans-decalin              | 46.65 | 46.9  |
| Perfluorotributylamine               | 64.77 | 65.03 |
| Perfluorotripropylamine              | 50.02 | 50    |
| Perhydrofluorene                     | 55.57 | 55.75 |
| Perhydrophenanthrene                 | 60.04 | 60.38 |
| Perillaldehyde                       | 46.37 | 46.41 |
| Phenanthrene                         | 61.74 | 62.44 |
| Phenethyl alcohol                    | 37.14 | 37.37 |
| Phenethyl propionate                 | 50.96 | 51.6  |
| Pheniramine                          | 76.17 | 76.14 |
| Phenol                               | 28.04 | 28.29 |
| Phenoxyacetylene                     | 34.9  | 35.74 |
| Phenoxytriethylsilane                | 64.47 | 64.56 |
| Phenoxytrimethylsilane               | 51.17 | 50.85 |
| Phenoxytripropylsilane               | 78.41 | 78.45 |
| Phenyl 2-tolyl propoxyborine         | 77.12 | 77.05 |
| Phenyl chloroacetate                 | 42.13 | 42.54 |
| Phenyl chlorofluorophosphate         | 40.12 | 40.28 |

|                                                             |        |        |
|-------------------------------------------------------------|--------|--------|
| Phenyl di(sec-butoxy)borine                                 | 71.45  | 71.64  |
| Phenyl di(sec-octoxy)borine                                 | 108.55 | 108.68 |
| Phenyl dibutoxyborine                                       | 71.32  | 71.62  |
| Phenyl diethoxyborine                                       | 52.87  | 53.1   |
| Phenyl diisobutoxyborine                                    | 71.44  | 71.54  |
| Phenyl dimethoxyborine                                      | 43.45  | 43.78  |
| Phenyl dipropoxyborine                                      | 62.4   | 62.36  |
| Phenyl ethoxy 2-(ethoxycarbonyl)propyl phosphorus oxide     | 74.96  | 74.82  |
| Phenyl ethoxy 2-(methoxycarbonyl)ethyl phosphorus oxide     | 65.75  | 65.57  |
| Phenyl ethoxy 2-(methoxycarbonyl)propyl phosphorus oxide    | 70.54  | 70.16  |
| Phenyl ethoxy 2-(propoxycarbonyl)propyl phosphorus oxide    | 79.34  | 79.45  |
| Phenyl hexoxy 2-(methoxycarbonyl)propyl phosphorus oxide    | 89.23  | 88.68  |
| Phenyl isobutoxy 2-(methoxycarbonyl)propyl phosphorus oxide | 79.57  | 79.38  |
| Phenyl n-propyl sulfide                                     | 49.05  | 48.9   |
| Phenyl O-ethyl phosphonic acid                              | 46.62  | 46.48  |
| Phenyl O-heptyl phosphonic acid                             | 69.33  | 69.63  |
| Phenyl O-hexyl phosphonic acid                              | 64.38  | 65     |
| Phenyl O-isobutyl phosphonic acid                           | 55.36  | 55.7   |
| Phenyl O-isopropyl phosphonic acid                          | 50.52  | 51.12  |
| Phenyl O-methyl phosphonic acid                             | 41.11  | 41.82  |
| Phenyl O-nonyl phosphonic acid                              | 78.82  | 78.89  |
| Phenyl O-octyl phosphonic acid                              | 73.98  | 74.26  |
| Phenyl propanoate                                           | 42.18  | 42.37  |
| Phenyl vinyl ether                                          | 37.53  | 36.98  |
| Phenyl-2-thienylmethanone                                   | 55.48  | 54.63  |
| Phenylacetaldehyde                                          | 35.88  | 36.48  |
| Phenylacetate                                               | 37.37  | 37.74  |
| Phenylacetone                                               | 40.48  | 40.86  |
| Phenylacetonitrile                                          | 34.96  | 35.75  |
| Phenylacetyl chloride                                       | 41.04  | 41.42  |
| Phenylamino(diethylamino)borane                             | 58.85  | 58.5   |
| Phenylbis(2-methylallyl)phosphine                           | 73.15  | 73.26  |
| Phenylboron dichloride                                      | 41.64  | 41.33  |
| Phenylchloroacetylene                                       | 39.75  | 39.88  |
| Phenylcyclohexane                                           | 52.75  | 52.3   |
| Phenyldiallylphosphine                                      | 63.22  | 63.86  |
| Phenyldibutylcarbinol                                       | 69.38  | 69.73  |

|                                |        |        |
|--------------------------------|--------|--------|
| Phenyldichlorofluoromethane    | 41.29  | 41.02  |
| Phenylisocyanate               | 33.95  | 33.54  |
| Phenylphosphine                | 36.58  | 36.16  |
| Phenylphosphorous diaziridide  | 58.77  | 58.9   |
| Phenylpropylboronic acid       | 46.4   | 46.18  |
| Phenylpropylboronic anhydride  | 90.3   | 91.05  |
| Phenylpropylether              | 42.38  | 42.33  |
| Phenylsilane                   | 37.44  | 37.09  |
| Phenyltri(2-octyloxy)silane    | 149.82 | 149.85 |
| Phenyltri(cyclohexyloxy)silane | 115.7  | 115.65 |
| Phenyltrichlorosilane          | 48.92  | 49.32  |
| Phenyltrifluorosilane          | 33.09  | 33.23  |
| Phenyltriisopentyloxysilane    | 108.25 | 108.03 |
| Phenyltrimethylsilane          | 49.88  | 50.21  |
| Phlorol                        | 37.59  | 37.73  |
| Phosphamidon                   | 69.15  | 68.28  |
| Phosphoric acid                | 12.26  | 12.92  |
| Phosphoric acid ethylester     | 22.63  | 22.63  |
| Phthaloyl chloride             | 47.17  | 47.06  |
| Phytol                         | 95.5   | 95.9   |
| Pimelonitrile                  | 34.41  | 34.13  |
| Pinacolone                     | 30.05  | 30.17  |
| Piperidine                     | 26.74  | 26.52  |
| Piperitenone                   | 47.43  | 46.38  |
| Piperitone                     | 46.72  | 46.36  |
| p-Isopropenylisopropylbenzene  | 54.86  | 54.38  |
| Pivalaldehyde                  | 25.13  | 25.79  |
| Pivalic acid chloride          | 30.03  | 30.73  |
| Pivalone                       | 43.63  | 44.04  |
| Pivalonitrile                  | 25.23  | 25.06  |
| Pivalophenone                  | 50.27  | 50.1   |
| Placidyl                       | 37.98  | 38.36  |
| p-Menthadiene                  | 45.46  | 45.89  |
| p-Menthane                     | 46.32  | 46.18  |
| Prehnitene                     | 45.1   | 45.76  |
| Pristane                       | 90.3   | 89.95  |
| Propanal                       | 16.22  | 16.55  |
| Propanal oxime                 | 20.34  | 20.54  |
| Propanamide                    | 19.14  | 19.18  |
| Propandioic acid               | 19.07  | 19.23  |
| Propane                        | 15.87  | 16.03  |
| Propane-1,2-dinitrite          | 28.58  | 28.24  |

|                                                |       |       |
|------------------------------------------------|-------|-------|
| Propane-1,2-dithiol                            | 31.05 | 31.36 |
| Propane-1,3-dithiol                            | 31.48 | 31.37 |
| Propanedioyl dichloride                        | 26.8  | 26.95 |
| Propanenitrile                                 | 15.76 | 15.82 |
| Propanoic acid                                 | 17.4  | 17.63 |
| Propanoic anhydride                            | 31.47 | 31.71 |
| Propanolamine                                  | 21.01 | 20.87 |
| Propanone                                      | 16.29 | 16.3  |
| Propanoyl chloride                             | 21.22 | 21.49 |
| Propargyl acetate                              | 24.8  | 25    |
| Propargyl aldehyde                             | 14.42 | 14.51 |
| Propargyl propionate                           | 29.38 | 29.63 |
| Propargylamine                                 | 18.36 | 17.42 |
| Propenal                                       | 16.24 | 16.24 |
| Propham                                        | 51.48 | 51.26 |
| Propiolic acid                                 | 15.92 | 15.59 |
| Propoxyacetylene                               | 24.88 | 25.04 |
| Propoxydichloromethylsulfenyl chloride         | 45.39 | 45.45 |
| Propyl 1-naphthaleneacetate                    | 69.24 | 69.56 |
| Propyl 1-naphthoate                            | 65.24 | 64.93 |
| Propyl 1-naphthylketone                        | 63.32 | 63.45 |
| Propyl 2-hydroxybenzoate                       | 49.58 | 48.74 |
| Propyl 2-naphthaleneacetate                    | 69.57 | 69.56 |
| Propyl 2-naphthoate                            | 65.88 | 64.93 |
| Propyl 2-thiophenecarboxylate                  | 45.94 | 45.44 |
| Propyl 3-chloropropanoate                      | 36.44 | 36.47 |
| Propyl 4-toluenesulfonate                      | 55.07 | 55.16 |
| Propyl butyrate                                | 36.16 | 36.3  |
| Propyl chloroformate                           | 27.46 | 27.43 |
| Propyl dichloroacetate                         | 36.85 | 36.7  |
| Propyl hexanoate                               | 45.89 | 45.56 |
| Propyl hydrocinnamate                          | 55.81 | 56.23 |
| Propyl isobutanoate                            | 35.33 | 36.26 |
| Propyl isocyanate                              | 22.57 | 23.11 |
| Propyl isothiocyanate                          | 30.86 | 30.67 |
| Propyl isovalerate                             | 40.85 | 40.89 |
| Propyl N,N-diethylamino phosphorusoxy chloride | 50.96 | 50.84 |
| Propyl N,N-diethylamino phosphorusoxy fluoride | 44.87 | 44.88 |
| Propyl nitrite                                 | 22.22 | 22.13 |
| Propyl octanoate                               | 54.34 | 54.82 |
| Propyl phenylacetate                           | 51.22 | 51.6  |
| Propyl phosphorusoxy dichloride                | 34.42 | 34.27 |

|                                     |       |       |
|-------------------------------------|-------|-------|
| Propyl propanoate                   | 31.51 | 31.67 |
| Propyl propylxanthate               | 52.71 | 52.67 |
| Propyl thiocyanate                  | 28.39 | 28.53 |
| Propyl trichloroacetate             | 41.77 | 41.76 |
| Propyl valerate                     | 40.77 | 40.93 |
| Propyl vinyl ether                  | 26.66 | 26.28 |
| Propylallene                        | 29.57 | 29.88 |
| Propylammonium nitrate              | 28.78 | 28.74 |
| Propylbenzenesulfonate              | 50.19 | 50.35 |
| Propylbutoxyphosphinic chloride     | 45.07 | 45.08 |
| Propylcyclohexane                   | 41.68 | 41.63 |
| Propylcyclohexylketone              | 46.85 | 46.53 |
| Propylcyclopentane                  | 37.08 | 37    |
| Propylene                           | 15.79 | 15.72 |
| Propylenecarbonate                  | 21.4  | 21.74 |
| Propylenediamine                    | 22.51 | 22.82 |
| Propyleneglycol dinitrate           | 30.97 | 31.28 |
| Propylhexedrine                     | 50.03 | 49.6  |
| Propyliodoacetylene                 | 35.76 | 36    |
| Propylisobutoxyphosphinic chloride  | 44.74 | 45.04 |
| Propylisopropoxyphosphinic chloride | 40.58 | 40.46 |
| Propylphosphonyl difluoride         | 23.62 | 23.69 |
| Propylpropoxyphosphinic chloride    | 40.32 | 40.45 |
| Propylsulfinyl chloride             | 30.54 | 30.38 |
| Propylsulfonyl fluoride             | 24.71 | 25.65 |
| Propyltrichlorosilane               | 38.46 | 38.64 |
| Propyltriisothiocyanatosilane       | 68.69 | 69.1  |
| Pseudopelletierine                  | 43.17 | 43.52 |
| p-Toluidine                         | 35.67 | 35.4  |
| Pulegone                            | 46.85 | 46.47 |
| p-Xylyldiallylphosphine             | 72.99 | 73.48 |
| Pyrazine                            | 22.66 | 21.92 |
| Pyrene                              | 72.58 | 71.56 |
| Pyridazine                          | 22.13 | 22.14 |
| Pyridine                            | 24.07 | 24.22 |
| Pyrimidine                          | 21.52 | 21.28 |
| Pyrrole                             | 20.64 | 21.19 |
| Pyrrolidine                         | 21.97 | 21.89 |
| Pyrvaldehyde                        | 16.72 | 16.82 |
| Pyruvic acid                        | 18.46 | 17.9  |
| Quinoline                           | 41.69 | 41.79 |
| R-11                                | 56.95 | 57.6  |



|                                                                        |        |        |
|------------------------------------------------------------------------|--------|--------|
| Refrigerant 115                                                        | 16.59  | 16.65  |
| Refrigerant 216                                                        | 26.51  | 26.35  |
| Rhodinol                                                               | 49.65  | 49.57  |
| Ricinelaiddic acid                                                     | 88.38  | 88.3   |
| Safranal                                                               | 47.53  | 46.54  |
| Safrole                                                                | 46.13  | 46.39  |
| s-Butyl ethyl ether                                                    | 31.56  | 31.62  |
| s-Butyl pentanoate                                                     | 45.27  | 45.57  |
| s-Butyl propionate                                                     | 36.07  | 36.31  |
| s-Butylacetate                                                         | 31.39  | 31.68  |
| s-Butylbenzene                                                         | 45.03  | 45.18  |
| S-Butyl-dimethylthioformamidium<br>bis(trifluoromethylsulfonyl) amide  | 79.26  | 79.02  |
| S-Butyl-dimethylthioformamidium<br>difluorooxalylborate                | 63.42  | 63.09  |
| s-Butylethylamine                                                      | 33.48  | 33.22  |
| s-Butylformate                                                         | 27.15  | 27.18  |
| s-Butylmethylether                                                     | 26.76  | 26.96  |
| s-Butylnitrate                                                         | 28.23  | 28.29  |
| s-Butylnitrite                                                         | 26.8   | 26.77  |
| s-Butyl-t-butylether                                                   | 40.34  | 40.83  |
| Sebaconitrile                                                          | 48.11  | 48.02  |
| sec-Amyl acetate                                                       | 35.95  | 36.31  |
| sec-Butyl hydroperoxide                                                | 24.3   | 24.41  |
| S-Ethyl thioacetate                                                    | 29.04  | 28.92  |
| S-Ethyl-dimethylthioformamidium<br>bis(trifluoromethylsulfonyl) amide  | 69.84  | 69.76  |
| S-Ethyl-dimethylthioformamidium<br>difluorooxalylborate                | 53.86  | 53.83  |
| S-Ethyl-dimethylthioformamidium<br>trifluoromethylsulfonate            | 53.62  | 52.95  |
| S-Methyl-dimethylthioformamidium<br>bis(trifluoromethylsulfonyl) amide | 64.95  | 64.92  |
| S-Methyl-dimethylthioformamidium<br>trifluoromethylsulfonate           | 48.32  | 48.11  |
| Solanone                                                               | 62.94  | 62.08  |
| Sorbic alcohol                                                         | 32.09  | 30.93  |
| Sparteine                                                              | 71.14  | 70.45  |
| s-Phenethyl alcohol                                                    | 37.05  | 37.38  |
| Spiro[5.5]undecane                                                     | 48.65  | 48.77  |
| S-Propylthioacetate                                                    | 33.47  | 33.55  |
| Squalene                                                               | 140.49 | 140.26 |
| S-sec-Butyl thioacetate                                                | 38.29  | 38.17  |

|                                         |        |        |
|-----------------------------------------|--------|--------|
| S-t-Butyl thiolacetate                  | 38.22  | 38.55  |
| Stearic acid                            | 86.96  | 87.08  |
| Stearyl mercaptan                       | 93.39  | 93.15  |
| Styrene                                 | 36.47  | 35.65  |
| Styrene oxide                           | 35.62  | 35.52  |
| Suberone                                | 32.36  | 32.68  |
| Suberonitrile                           | 38.55  | 38.76  |
| Succinonitrile                          | 20.43  | 20.24  |
| Succinyl chloride                       | 31.35  | 31.58  |
| Sucrose octaacetate                     | 146.84 | 146.21 |
| Sulcatol                                | 40.36  | 40.47  |
| Sulcatone                               | 39.26  | 39.32  |
| Sulfolane                               | 26.99  | 27.28  |
| Sulfotep                                | 75.91  | 76.66  |
| t-Amyl mercaptan                        | 33.72  | 33.33  |
| t-Amyl t-butyl disulfide                | 60.31  | 60.67  |
| t-Amylhydroperoxide                     | 28.95  | 28.98  |
| t-Butoxytriethylsilane                  | 58.54  | 58.59  |
| t-Butoxytrimethylsilane                 | 44.98  | 44.88  |
| t-Butoxytripropylsilane                 | 72.68  | 72.48  |
| t-Butyl acrylate                        | 36.21  | 35.94  |
| t-Butyl isocyanate                      | 28.09  | 27.67  |
| t-Butyl vinyl ether                     | 31.03  | 30.86  |
| t-Butylacetate                          | 31.45  | 31.62  |
| t-Butylacetylene                        | 28.3   | 27.86  |
| t-Butylamine                            | 24.26  | 24.02  |
| t-Butylbenzene                          | 44.99  | 45.2   |
| t-Butylcyclohexane                      | 46.11  | 46.24  |
| t-Butylformamide                        | 29.11  | 28.75  |
| t-Butylformate                          | 27.07  | 27.12  |
| t-Butylhydroperoxide                    | 24.46  | 24.35  |
| t-Butylmercaptan                        | 28.92  | 28.7   |
| t-Butylnitrite                          | 26.77  | 26.71  |
| t-Butyl-t-amylperoxide                  | 47.9   | 47.83  |
| TEPP                                    | 61.73  | 61.6   |
| Terpinen-4-ol                           | 47.2   | 47.49  |
| Terpinolene                             | 45.5   | 46.11  |
| tert-Butyl 3-oxobutanoate               | 40.86  | 41.15  |
| Tetra(1H,1H,3H-perfluoropropyl)silicate | 72.19  | 72.1   |
| Tetra(1H,1H,5H-perfluoropentyl)silicate | 111.97 | 112.18 |
| Tetra(2-ethylbutyl) silicate            | 125.53 | 126.42 |
| Tetra(diethylamino)silane               | 97.33  | 97.72  |

|                                                                     |        |        |
|---------------------------------------------------------------------|--------|--------|
| Tetra(dimethylamino)silane                                          | 61.29  | 61     |
| Tetra-2-butoxysilane                                                | 90.48  | 89.58  |
| Tetra-2-methyl-1-propoxysilane                                      | 88.88  | 89.38  |
| Tetra-2-pentoxysilane                                               | 108.98 | 108.1  |
| Tetra-3-methyl-1-butoxysilane                                       | 107.23 | 107.9  |
| Tetrabutoxysilane                                                   | 88.88  | 89.54  |
| Tetrabutylphosphonium acetate                                       | 97.22  | 97.33  |
| Tetrabutylphosphonium formate                                       | 93.57  | 93.04  |
| Tetrabutylphosphonium propanoate                                    | 102.16 | 101.96 |
| Tetracene                                                           | 81.41  | 80.4   |
| Tetrachloroethylene                                                 | 30.35  | 30.6   |
| Tetrachlorothiophene                                                | 44.05  | 44.07  |
| Tetracosamethylhendecasiloxane                                      | 217.25 | 216.8  |
| Tetracosane                                                         | 113.09 | 113.26 |
| Tetracosanoic acid                                                  | 115.73 | 114.86 |
| Tetradecamethylcycloheptasiloxane                                   | 130.84 | 130.55 |
| Tetradecamethylhexasiloxane                                         | 123.45 | 123.55 |
| Tetradecane                                                         | 67.33  | 66.96  |
| Tetradecanoic acid                                                  | 68.44  | 68.56  |
| Tetradecanoic anhydride                                             | 134.25 | 133.57 |
| Tetradecyl trihexylphosphonium<br>bis(trifluoromethylsulfonyl)amide | 192.57 | 192.55 |
| Tetradecyl trihexylphosphonium chloride                             | 166.32 | 166.74 |
| Tetradecylbenzene                                                   | 91.5   | 91.52  |
| Tetradecylcyclohexane                                               | 92.72  | 92.56  |
| Tetraethoxymethane                                                  | 49.67  | 49.85  |
| Tetraethoxysilane                                                   | 53.33  | 52.5   |
| Tetraethylmethane                                                   | 43.12  | 43.79  |
| Tetraethylsilane                                                    | 48.37  | 48.61  |
| Tetraethylurea                                                      | 50.12  | 50.43  |
| Tetraglycol                                                         | 46.94  | 47.07  |
| Tetrahexoxysilane                                                   | 127.5  | 126.58 |
| Tetrahydro-2,5-dimethoxyfuran                                       | 32.65  | 32.47  |
| Tetrahydro-2H-pyran-2-methanol                                      | 30.86  | 30.89  |
| Tetrahydro-2H-pyran-2-one                                           | 24.29  | 24.9   |
| Tetrahydro-3-furanol                                                | 21.72  | 21.63  |
| Tetrahydro-3-methyl-2H-thiopyran                                    | 35.61  | 35.66  |
| Tetrahydro-4H-pyran-4-one                                           | 24.92  | 25.11  |
| Tetrahydrodicyclopentadiene                                         | 41.93  | 41.86  |
| Tetrahydrofuran                                                     | 19.88  | 20.21  |
| Tetrahydrofurfuryl acetate                                          | 35.41  | 35.86  |
| Tetrahydrofurfuryl alcohol                                          | 26.18  | 26.26  |

|                                          |        |        |
|------------------------------------------|--------|--------|
| Tetrahydrofurfuryl methacrylate          | 44.44  | 44.88  |
| Tetrahydrofurfurylamine                  | 28.15  | 28.28  |
| Tetrahydromyrcenol                       | 50.14  | 49.76  |
| Tetrahydropyran                          | 24.73  | 24.84  |
| Tetraisobutylsilane                      | 86     | 85.49  |
| Tetraisopropoxysilane                    | 70.82  | 71.06  |
| Tetraisopropylsilane                     | 66.92  | 67.33  |
| Tetramethyl orthocarbonate               | 31.15  | 31.21  |
| Tetramethylene glycol                    | 23.63  | 23.48  |
| Tetramethylethene                        | 29.59  | 29.86  |
| Tetramethyloxirane                       | 29.67  | 29.37  |
| Tetramethylsilane                        | 29.95  | 30.33  |
| Tetramethyltetraphenylcyclotetrasiloxane | 154.31 | 154.12 |
| Tetramethylurea                          | 32.2   | 32.07  |
| Tetramethyoxysilane                      | 33.51  | 33.86  |
| Tetraoctoxysilane                        | 163.9  | 163.62 |
| Tetrapentoxysilane                       | 107.38 | 108.06 |
| Tetrapropoxymethane                      | 68.6   | 68.37  |
| Tetrapropoxysilane                       | 70.65  | 71.02  |
| Tetrasilane                              | 48.89  | 48.72  |
| Tetravinylsilane                         | 46.88  | 47.09  |
| Thiamorpholine                           | 29.69  | 29.81  |
| Thianaphthene                            | 41.97  | 41.23  |
| Thiane                                   | 30.83  | 31.07  |
| Thiepane                                 | 34.75  | 35.7   |
| Thietane                                 | 21.75  | 21.81  |
| Thiirane                                 | 17.26  | 17.18  |
| Thioacetic acid                          | 19.77  | 19.16  |
| Thioanisole                              | 39.45  | 39.43  |
| Thioglycerol                             | 26.69  | 26.53  |
| Thiolactic acid                          | 25.3   | 25.29  |
| Thiolane                                 | 26.15  | 26.44  |
| Thiolane 1-oxide                         | 27.16  | 27.32  |
| Thiophene                                | 24.36  | 24.81  |
| Thiophos                                 | 71.73  | 71.17  |
| Thujone                                  | 44.83  | 44.29  |
| Tiglic acid                              | 26.99  | 26.76  |
| Tiglic aldehyde                          | 25.83  | 25.68  |
| t-Nonylmercaptan                         | 51.27  | 51.85  |
| t-Pentylbenzene                          | 49.49  | 49.83  |
| trans-(1-Methyl-1-propenyl)benzene       | 45.57  | 45.09  |
| trans,trans-2,4-Hexadiene                | 30.42  | 29.52  |

|                                                        |       |       |
|--------------------------------------------------------|-------|-------|
| trans-1,2-Bis(trimethylsilyl)-3,3-dichlorocyclopropane | 71.02 | 70.62 |
| trans-1,2-Dibromocyclohexane                           | 43.04 | 43.36 |
| trans-1,2-Dibromoethene                                | 26.56 | 26.28 |
| trans-1,2-Dichloroethylene                             | 20.55 | 20.58 |
| trans-1,2-Dichloropropene                              | 25.09 | 25.44 |
| trans-1,2-Dimethylcyclohexane                          | 37.13 | 36.96 |
| trans-1,2-Dimethylcyclopentane                         | 32.72 | 32.33 |
| trans-1,2-Dimethylcyclopropane                         | 23.94 | 23.07 |
| trans-1,2-Divinylcyclobutane                           | 36.84 | 36.34 |
| trans-1,3,5-Trimethylcyclohexane                       | 41.9  | 41.55 |
| trans-1,3-Dichloropropene                              | 25.58 | 25.32 |
| trans-1,3-Dimethylcyclohexane                          | 36.57 | 36.96 |
| trans-1,3-Dimethylcyclopentane                         | 32.73 | 32.33 |
| trans-1,4-Dichloro-2-butene                            | 30.39 | 30.06 |
| trans-1,4-Dimethylcyclohexane                          | 36.76 | 36.96 |
| trans-1,4-Hexadiene                                    | 29.31 | 29.41 |
| trans-1-Bromo-1-butene                                 | 27.61 | 28    |
| trans-1-Chloro-1-butene                                | 25.42 | 25.15 |
| trans-1-Chloropropene                                  | 20.08 | 20.52 |
| trans-1-Ethyl-2-methylcyclopentane                     | 37.27 | 36.96 |
| trans-1-Ethyl-3-methylcyclopentane                     | 37.16 | 36.96 |
| trans-1-Ethyl-4-methylcyclohexane                      | 41.85 | 41.59 |
| trans-1-Methyl-2-propylcyclopentane                    | 41.94 | 41.59 |
| trans-2,2-Dimethyl-3-hexene                            | 39.43 | 38.96 |
| trans-2,3-Epoxybutane                                  | 20.54 | 20.23 |
| trans-2-Bromo-2-butene                                 | 27.77 | 27.87 |
| trans-2-Butene                                         | 21.42 | 20.46 |
| trans-2-Butene-1,4-diol                                | 23.2  | 23.28 |
| trans-2-Chloro-2-butene                                | 25.02 | 25.38 |
| trans-2-Hepten-1-ol                                    | 35.76 | 35.76 |
| trans-2-Heptene                                        | 34.28 | 34.35 |
| trans-2-Heptenoic acid                                 | 36.05 | 35.95 |
| trans-2-Hexen-1-ol                                     | 30.72 | 31.13 |
| trans-2-Hexen-1-ol, acetate                            | 40.66 | 40.73 |
| trans-2-Hexenal                                        | 30.94 | 30.24 |
| trans-2-Hexene                                         | 29.87 | 29.72 |
| trans-2-Methyl-1,3-pentadiene                          | 30.47 | 29.48 |
| trans-2-Methyl-2-pentenoic acid                        | 31.54 | 31.39 |
| trans-2-Methyl-3-hexene                                | 34.74 | 34.31 |
| trans-2-Methylcyclohexanol                             | 33.92 | 33.79 |
| trans-2-Nonenoic acid                                  | 45.36 | 45.21 |
| trans-2-Octenal                                        | 40.09 | 39.5  |

|                                               |       |       |
|-----------------------------------------------|-------|-------|
| trans-2-Octene                                | 38.89 | 38.98 |
| trans-2-Octenoic acid                         | 40.73 | 40.58 |
| trans-2-Penten-1-ol                           | 26.49 | 26.5  |
| trans-2-Pentene                               | 25.22 | 25.09 |
| trans-2-Pentenoic acid                        | 26.83 | 26.69 |
| trans-2-Undecene                              | 52.86 | 52.87 |
| trans-3,4-Dimethyl-2-pentene                  | 34.35 | 34.38 |
| trans-3,7-Dimethyl-2,6-octadien-1-ol formate  | 55.55 | 54.69 |
| trans-3-heptene                               | 34.42 | 34.35 |
| trans-3-Heptenoic acid                        | 36.05 | 35.95 |
| trans-3-Hexene                                | 29.75 | 29.72 |
| trans-3-Hexenoic acid                         | 31.42 | 31.32 |
| trans-3-Methyl-3-hexene                       | 34.57 | 34.42 |
| trans-3-Methylcyclohexanol                    | 33.86 | 33.79 |
| trans-3-Octene                                | 39.09 | 38.98 |
| trans-3-Penten-1-yne                          | 23.82 | 23.05 |
| trans-3-Pentenitrile                          | 24.63 | 24.88 |
| trans-3-Phenyl-2-propen-1-ol                  | 42.89 | 41.8  |
| trans-4,4-Dimethyl-2-pentene                  | 34.42 | 34.33 |
| trans-4-Hexen-1-ol                            | 31.02 | 31.13 |
| trans-4-Methyl-2-hexene                       | 34.56 | 34.31 |
| trans-4-Methylcyclohexanol                    | 33.83 | 33.79 |
| trans-4-Octene                                | 39.05 | 38.98 |
| trans-4-Undecene                              | 52.93 | 52.87 |
| trans-5-Decene                                | 48.39 | 48.24 |
| trans-5-Methyl-2-(1-methylvinyl)cyclohexanone | 45.97 | 46.25 |
| trans-5-Methyl-2-hexene                       | 34.63 | 34.31 |
| trans-5-Octenoic acid                         | 40.4  | 40.58 |
| trans-5-Undecene                              | 53    | 52.87 |
| trans-Chlorobromoethylene                     | 23.41 | 23.43 |
| trans-Cinnamyl acetate                        | 52.52 | 51.4  |
| trans-Citral                                  | 49.36 | 48.7  |
| trans-Crotonitrile                            | 20.71 | 20.25 |
| trans-Cyclohexane-1,2-dinitrite               | 39.13 | 40    |
| trans-Cyclooctene                             | 36.52 | 36.84 |
| trans-Decalin                                 | 44.51 | 44.08 |
| trans-Geraniol                                | 48.97 | 49.59 |
| trans-Hydrindan                               | 39.58 | 39.45 |
| trans-Octahydro-1(2H)-naphthalenone           | 44.24 | 44.35 |
| Tri(1,2,2-trimethylpropoxy)borine             | 93.61 | 94.28 |
| Tri(1,3-dichloro-2-propoxy)borine             | 81.12 | 81.47 |
| Tri(1-chloroethoxy)borine                     | 52.99 | 53.51 |

|                                                             |        |        |
|-------------------------------------------------------------|--------|--------|
| Tri(1-ethoxycarbonylethoxy)borine                           | 85.93  | 85.7   |
| Tri(1-methoxyethoxy)borine                                  | 57.42  | 57.14  |
| Tri(2-ethoxycarbonylethoxy)borine                           | 84.97  | 85.67  |
| Tri(2-pentoxy)borine                                        | 80.11  | 80.45  |
| Tri(butylthio)borane                                        | 87.47  | 87.36  |
| Tri(ethoxycarbonylmethoxy)borine                            | 71.14  | 71.78  |
| Tri(ethoxyethyl) phosphate                                  | 74.96  | 74.9   |
| Tri(methoxyethyl) phosphate                                 | 60.98  | 60.92  |
| Tri(propylthio)borane                                       | 73.47  | 73.47  |
| Tri(t-butoxy)borine                                         | 66.77  | 66.38  |
| Triallylamine                                               | 45.6   | 46.7   |
| Tribromoethylene                                            | 33.65  | 33.9   |
| Tributoxymethane                                            | 67.5   | 67.41  |
| Tributyl borate                                             | 66.65  | 66.53  |
| Tributyl citrate                                            | 92.16  | 92.09  |
| Tributyl phosphate                                          | 69.63  | 69.83  |
| Tributyl phosphite                                          | 70.14  | 70.92  |
| Tributylamine                                               | 61.61  | 61.52  |
| Tributylisothiocyanatosilane                                | 82.05  | 81.6   |
| Tributylmethylammonium<br>bis(trifluoromethylsulfonyl)amide | 97.59  | 97.53  |
| Tributylphosphine                                           | 68.48  | 68.23  |
| Tributylsilane                                              | 67.51  | 67.16  |
| Tributylsilanol                                             | 67.79  | 67.96  |
| Tributylsilylamine                                          | 69.61  | 69.78  |
| Tricaprilin                                                 | 132.13 | 132.41 |
| Trichloro-2-phenoxyethylsilane                              | 60.44  | 60.31  |
| Trichloroacetaldehyde diethylacetal                         | 47.8   | 47.86  |
| Trichloroacetic acid                                        | 27.77  | 27.72  |
| Trichloroacetic anhydride                                   | 52.27  | 51.89  |
| Trichloroacetonitrile                                       | 26.47  | 25.91  |
| Trichloroacetylchloride                                     | 31.28  | 31.58  |
| Trichloroethylene                                           | 25.37  | 25.59  |
| Trichloromethoxybenzene                                     | 47.16  | 47.57  |
| Trichloromethylchloroformate                                | 32.58  | 32.67  |
| Trichlorotoluene                                            | 45.92  | 46.05  |
| Trichlorovinylsilane                                        | 33.54  | 33.63  |
| Tricosane                                                   | 108.8  | 108.63 |
| Tridecanal                                                  | 62.36  | 62.85  |
| Tridecane                                                   | 62.4   | 62.33  |
| Tridecanonitrile                                            | 62.08  | 62.12  |
| Tridecyl borate                                             | 149.41 | 149.87 |

|                                                            |        |        |
|------------------------------------------------------------|--------|--------|
| Tridecyl methacrylate                                      | 81.57  | 82.36  |
| Tridecyl thiocyanate                                       | 74.85  | 74.83  |
| Tridecylamine                                              | 65.84  | 65.76  |
| Tridecylbenzene                                            | 86.86  | 86.89  |
| Tridecylcyclohexane                                        | 88.1   | 87.93  |
| Tridecylmercaptan                                          | 69.88  | 70     |
| Tridodecylamine                                            | 172.98 | 172.64 |
| Triethanolamine                                            | 38.05  | 37.97  |
| Triethoxymethylsilane                                      | 46.5   | 46.6   |
| Triethoxypentylsilane                                      | 64.96  | 65.06  |
| Triethoxyphenylsilane                                      | 66.15  | 66.48  |
| Triethyl 1-propoxyethoxysilane                             | 65.15  | 64.8   |
| Triethyl 2,2-diethylhydrazinosilane                        | 64.5   | 64.6   |
| Triethyl 2,2-dimethylhydrazinosilane                       | 55.48  | 55.42  |
| Triethyl acetylcitrate                                     | 73.62  | 73.91  |
| Triethyl aconitate                                         | 63.41  | 62.82  |
| Triethyl borate                                            | 38.69  | 38.75  |
| Triethyl citrate                                           | 64.74  | 64.31  |
| Triethyl phosphate                                         | 41.77  | 42.05  |
| Triethyl phosphite                                         | 43     | 43.14  |
| Triethylamine                                              | 33.79  | 33.74  |
| Triethylammonium acetate                                   | 46.76  | 46.42  |
| Triethylborane                                             | 33.72  | 34.51  |
| Triethyldecylammonium bis(trifluoromethylsulfonyl) amide   | 111.38 | 111.11 |
| Triethyldodecylammonium bis(trifluoromethylsulfonyl) amide | 120.72 | 120.37 |
| Triethyleneglycol                                          | 36.01  | 36.12  |
| Triethylheptylammonium bis(trifluoromethylsulfonyl) amide  | 97.05  | 97.22  |
| Triethylhexylammonium bis(trifluoromethylsulfonyl) amide   | 92.72  | 92.59  |
| Triethylisothiocyanatosilane                               | 53.85  | 53.82  |
| Triethylmethanol                                           | 35.66  | 35.91  |
| Triethyloctylammonium bis(trifluoromethylsulfonyl) amide   | 101.96 | 101.85 |
| Triethylphosphine                                          | 40.27  | 40.45  |
| Triethylsilane                                             | 39.6   | 39.38  |
| Triethylsilanol                                            | 40.59  | 40.18  |
| Triethylsilylamine                                         | 42.07  | 42     |
| Triethylsilyloxytripropylsilane                            | 90.19  | 90.26  |
| Triethylsulfonium bis(trifluoromethylsulfonyl) amide       | 70.04  | 70.13  |



|                                                                  |        |        |
|------------------------------------------------------------------|--------|--------|
| Triethyltetradecylammonium<br>bis(trifluoromethylsulfonyl) amide | 129.84 | 129.63 |
| Triethyltriphenylcyclotrisiloxane                                | 129.17 | 129.3  |
| Trifluoroacetic acid                                             | 13.66  | 13.28  |
| Trifluoroacetic anhydride                                        | 23.83  | 23.01  |
| Trifluoroacetoacetic acid ethylester                             | 33.75  | 33.01  |
| Trifluoroacetophenone                                            | 37.17  | 36.51  |
| Trifluoromethoxybenzene                                          | 32.4   | 32.62  |
| Triheptyl borate                                                 | 109.18 | 108.2  |
| Triheptyl phosphate                                              | 111.54 | 111.5  |
| Triheptyl phosphite                                              | 112.7  | 112.59 |
| Trihexoxymethane                                                 | 95.69  | 95.19  |
| Trihexyl phosphate                                               | 97.58  | 97.61  |
| Trihexyl phosphite                                               | 98.77  | 98.7   |
| Trihexyl tetradecyl phosphonium dicyanamide                      | 174.84 | 175.11 |
| Trihexyl tetradecyl phosphonium<br>trifluoromethylsulfonate      | 175.69 | 175.74 |
| Trihexylamine                                                    | 89.39  | 89.3   |
| Triisoamylamine                                                  | 75.33  | 75.29  |
| Triisobutoxymethane                                              | 67.39  | 67.29  |
| Triisobutylamine                                                 | 61.71  | 61.4   |
| Triisobutylborane                                                | 62.31  | 62.17  |
| Triisooctylamine                                                 | 116.54 | 116.96 |
| Triisopentoxyborine                                              | 80.14  | 80.3   |
| Tri-isopentoxymethane                                            | 81.31  | 81.33  |
| Triisopentylborane                                               | 76.54  | 76.06  |
| Triisopropoxymethane                                             | 53.51  | 53.55  |
| Triisopropoxyvinylsilane                                         | 65.03  | 64.71  |
| Triisopropyl borate                                              | 52.52  | 52.67  |
| Triisopropyl phosphate                                           | 55.79  | 55.97  |
| Triisopropylethoxysilane                                         | 63.56  | 63.42  |
| Triisopropylphenylsilane                                         | 77.5   | 77.96  |
| Triisopropylphosphite                                            | 56.74  | 57.06  |
| Triisopropylsilane                                               | 53.57  | 53.42  |
| Triisopropylsilyl chloride                                       | 57.72  | 57.57  |
| Trilaurin                                                        | 187.57 | 187.97 |
| Trimethoxyborine                                                 | 24.86  | 24.77  |
| Trimethoxymethylsilane                                           | 32.24  | 32.62  |
| Trimethoxyphenylsilane                                           | 52.32  | 52.5   |
| Trimethoxysilylamine                                             | 30.95  | 30.83  |
| Trimethyl 1-ethoxyethoxysilane                                   | 46.52  | 46.46  |
| Trimethyl 1-isopropoxyethoxysilane                               | 51.15  | 51.1   |

|                                                               |        |        |
|---------------------------------------------------------------|--------|--------|
| Trimethyl 2,2-diethylhydrazinosilane                          | 50.99  | 50.89  |
| Trimethyl 2,2-dimethylhydrazinosilane                         | 41.77  | 41.71  |
| Trimethyl butylammonium<br>bis(trifluoromethylsulfonyl)amide  | 70.29  | 70.37  |
| Trimethyl hexylammonium<br>bis(trifluoromethylsulfonyl)amide  | 79.64  | 79.63  |
| Trimethyl octylammonium<br>bis(trifluoromethylsulfonyl)amide  | 88.97  | 88.89  |
| Trimethyl pentylammonium<br>bis(trifluoromethylsulfonyl)amide | 75.01  | 75     |
| Trimethyl phosphate                                           | 27.76  | 28.07  |
| Trimethyl propylammonium<br>bis(trifluoromethylsulfonyl)amide | 65.65  | 65.74  |
| Trimethyl trimellitate                                        | 61.1   | 60     |
| Trimethylacetic acid                                          | 26.94  | 26.87  |
| Trimethylamine                                                | 20.97  | 19.97  |
| Trimethyleneglycol dinitrate                                  | 31.07  | 31.27  |
| Trimethylethylene                                             | 24.95  | 25.16  |
| Trimethylethylenediamine                                      | 32.83  | 32.6   |
| Trimethylisothiocyanatosilane                                 | 40.13  | 40.11  |
| Trimethylphosphite                                            | 29.2   | 29.16  |
| Trimethylsilanol                                              | 26.22  | 26.47  |
| Trimethylsilylaminodimethylphenylsilane                       | 71.09  | 71.18  |
| Trimethylsilylaminodiphenylmethylsilane                       | 91.05  | 91.06  |
| Trimethylsilylaminotriethylsilane                             | 65     | 65.01  |
| Trimethylsilylaminotrimethoxysilane                           | 53.7   | 53.84  |
| Trimethylsilylaminotriphenylsilane                            | 111.69 | 110.94 |
| Trimethylsilyloxytriethylsilane                               | 62.45  | 62.66  |
| Trimethylsilyloxytripropylsilane                              | 76.55  | 76.55  |
| Trimethylvinylsilane                                          | 34.55  | 34.52  |
| Trimyristin                                                   | 216.6  | 215.75 |
| tri-n-Amylphosphate                                           | 83.62  | 83.72  |
| Tri-n-octylamine                                              | 117.82 | 117.08 |
| Tri-n-pentylamine                                             | 75.3   | 75.41  |
| Trioctyl borate                                               | 122.3  | 122.09 |
| Trioctyl phosphite                                            | 126.61 | 126.48 |
| Tripentoxyborine                                              | 80.42  | 80.42  |
| Tripentoxy methane                                            | 81.19  | 81.3   |
| Tripentyl phosphite                                           | 85.2   | 84.81  |
| Tripentylsilane                                               | 81.54  | 81.05  |
| Triphenylphosphite                                            | 88.43  | 87.9   |
| Tripropionine                                                 | 62.84  | 62.96  |
| Tripropoxymethane                                             | 53.14  | 53.52  |

|                                       |        |        |
|---------------------------------------|--------|--------|
| Tripropyl borate                      | 52.55  | 52.64  |
| Tripropyl phosphate                   | 55.66  | 55.94  |
| Tripropyl phosphite                   | 56.91  | 57.03  |
| Tripropylamine                        | 47.78  | 47.63  |
| Tripropylborane                       | 48.54  | 48.4   |
| Tripropylene glycol                   | 53.72  | 54.68  |
| Tripropylsilane                       | 52.75  | 53.27  |
| Triptane                              | 34.14  | 34.49  |
| Tri-p-tolylamine                      | 94.58  | 94.97  |
| Tris(2,4-dimethylphenyl) phosphate    | 115.36 | 115.67 |
| Tris(2-butoxyethyl) phosphite         | 104.21 | 103.77 |
| Tris(2-chloroethyl) phosphate         | 57.52  | 56.45  |
| Tris(2-chloroethyl) phosphite         | 57.64  | 57.54  |
| Tris(2-ethoxyethyl) phosphite         | 76.35  | 75.99  |
| Tris(2-ethylhexyl) aconitate          | 146.43 | 146.04 |
| Tris(2-hexoxyethyl) phosphite         | 131.99 | 131.55 |
| Tris(2-hydroxyethyl)phosphine         | 44.67  | 44.68  |
| Tris(2-methoxyethyl) phosphite        | 62.36  | 62.01  |
| Tris(2-pentoxyethyl) phosphite        | 118.15 | 117.66 |
| Tris(2-propoxyethyl) phosphite        | 90.28  | 89.88  |
| Tris(4-bromophenyl)amine              | 103.16 | 103.31 |
| Tris(amylthio)phosphite               | 107.39 | 107.22 |
| Tris(butylthio)phosphite              | 93.35  | 93.33  |
| Tris(dimethylamino)dibutylaminosilane | 88.58  | 88.7   |
| Tris(ethylthio)borane                 | 59.41  | 59.58  |
| Tris(ethylthio)phosphite              | 65.28  | 65.55  |
| Tris(o-tolyl) phosphite               | 101.79 | 102.33 |
| Tris(propylthio)phosphite             | 79.39  | 79.44  |
| Tris(p-tolyl) phosphite               | 102.54 | 102.33 |
| Trisilane                             | 36.61  | 36.68  |
| Tritane                               | 80.63  | 80.41  |
| Tropacocaine                          | 70.14  | 69.57  |
| Tropine                               | 39.56  | 40.04  |
| Undecane                              | 53.04  | 53.07  |
| Undecanedioic acid                    | 56.13  | 56.27  |
| Undecanonitrile                       | 52.28  | 52.86  |
| Undecyl thiocyanate                   | 65.53  | 65.57  |
| Undecylbenzene                        | 77.58  | 77.63  |
| Uracil                                | 25.45  | 24.46  |
| Urea                                  | 12.99  | 12.17  |
| Valeramide                            | 29.2   | 28.44  |
| Valerophenone                         | 49.68  | 50.12  |

|                                   |        |        |
|-----------------------------------|--------|--------|
| Valeryl chloride                  | 30.05  | 30.75  |
| Veratrole                         | 39.56  | 39.56  |
| Vinyl acetate                     | 22.18  | 21.69  |
| Vinyl tris(2-chloropropoxy)silane | 79.31  | 78.96  |
| Vinylacetylene                    | 18.43  | 18.31  |
| Vinylcyclohexane                  | 36.61  | 36.69  |
| Vinylcyclopentane                 | 32.1   | 32.06  |
| Vinyldiethoxymethylsilane         | 45.09  | 45.23  |
| Vinylformate                      | 17.47  | 17.19  |
| Vinylidenechloride                | 20.43  | 20.79  |
| Vinylidoacetylene                 | 31.78  | 31.06  |
| Vinyloxirane                      | 19.56  | 19.91  |
| Vinyltriacetoxysilane             | 50.55  | 50.46  |
| Vinyltriethoxysilane              | 50.75  | 50.79  |
| Vinyltrimethoxysilane             | 36.41  | 36.81  |
| Vitamin E                         | 134.7  | 135.11 |
| Vitamin E acetate                 | 145.12 | 144.56 |
| Widdrene                          | 64.83  | 64.94  |
| Xibornol                          | 78.96  | 79.99  |
| Ylangene                          | 65.61  | 64.82  |
| Z,E-Nepetalactone                 | 44.75  | 45.25  |
