# Supplementary material
Source: MDPI journal article supplement (https://www.mdpi.com/2673-8015/2/4/20)
Supplement: s1 [file s1]

| Molecule name                                                            | Refractivity<br>exp | Refractivity<br>calc | Deviation | Dev.<br>in % |
|--------------------------------------------------------------------------|---------------------|----------------------|-----------|--------------|
| 1-(2-Cyanoethyl)-3-(2-hydroxyethyl)-imidazolium chloride                 | 51.06               | 50.40                | 0.66      | 1.29         |
| 1-(2-Cyanoethyl)-3-(2-propen-1-yl)-imidazolium chloride                  | 53.46               | 53.31                | 0.15      | 0.28         |
| 1-(2-Cyanoethyl)-3-octylimidazolium 3-sulfobenzoate                      | 111.59              | 112.27               | -0.68     | -0.61        |
| 1-(2-Hydroxyethyl)-3-methylimidazolium perfluoropentanoate               | 62.30               | 61.37                | 0.93      | 1.49         |
| 1-(3-Cyanopropyl)-3-methylimidazolium bis(trifluoromethylsulfonyl) amide | 74.64               | 74.84                | -0.20     | -0.27        |
| 1-(3-Cyanopropyl)-3-methylimidazolium dicyanamide                        | 56.96               | 57.40                | -0.44     | -0.77        |
| 1-(3-Cyanopropyl)-3-methylimidazolium tetrafluoroborate                  | 46.88               | 47.62                | -0.74     | -1.58        |
| 1-(3-Cyanopropyl)-pyridinium bis(trifluoromethylsulfonyl) amide          | 75.74               | 76.04                | -0.30     | -0.40        |
| 1-(3-Cyanopropyl)-pyridinium dicyanamide                                 | 57.75               | 58.60                | -0.85     | -1.47        |
| 1,1,3,3-Tetramethylguanidinium butanoate                                 | 56.23               | 56.13                | 0.10      | 0.18         |
| 1,1,3,3-Tetramethylguanidinium heptanoate                                | 70.63               | 70.02                | 0.61      | 0.86         |
| 1,1,3,3-Tetramethylguanidinium hexanoate                                 | 64.74               | 65.39                | -0.65     | -1.00        |
| 1,1,3,3-Tetramethylguanidinium octanoate                                 | 74.36               | 74.65                | -0.29     | -0.39        |
| 1,1,3,3-Tetramethylguanidinium pentanoate                                | 60.85               | 60.76                | 0.09      | 0.15         |
| 1,2-Diethylpyridinium ethylsulfate                                       | 64.48               | 64.43                | 0.05      | 0.08         |
| 1,3-Diethylimidazolium bis(trifluoromethylsulfonyl) amide                | 70.29               | 70.38                | -0.09     | -0.13        |
| 1,3-Dimethylimidazolium bis(trifluoromethylsulfonyl) amide               | 60.56               | 61.20                | -0.64     | -1.06        |
| 1,3-Dimethylimidazolium methosulfate                                     | 44.78               | 44.80                | -0.02     | -0.04        |
| 1,3-Dipropylimidazolium bis(trifluoromethylsulfonyl) amide               | 79.71               | 79.64                | 0.07      | 0.09         |
| 1-Benzyl-3-methylimidazolium bis(trifluoromethylsulfonyl) amide          | 85.86               | 85.72                | 0.14      | 0.16         |
| 1-Butyl-1-methylpiperidinium bis(trifluoromethylsulfonyl)amide           | 81.48               | 81.50                | -0.02     | -0.02        |
| 1-Butyl-1-methylpyrrolidinium 2-acryloamido-2-methylpropanesulfonate     | 91.47               | 90.77                | 0.70      | 0.77         |
| 1-Butyl-1-methylpyrrolidinium acetate                                    | 55.00               | 55.73                | -0.73     | -1.33        |
| 1-Butyl-1-methylpyrrolidinium bis(trifluoromethylsulfonyl)amide          | 76.89               | 76.87                | 0.02      | 0.03         |
| 1-Butyl-1-methylpyrrolidinium dicyanamide                                | 60.12               | 59.43                | 0.69      | 1.15         |
| 1-Butyl-1-methylpyrrolidinium methylsulfate                              | 60.93               | 60.47                | 0.46      | 0.75         |

|                                                                     |        |        |       |       |
|---------------------------------------------------------------------|--------|--------|-------|-------|
| 1-Butyl-1-methylpyrrolidinium trifluoromethanesulfonate             | 60.44  | 60.06  | 0.38  | 0.63  |
| 1-Butyl-2,3-dimethylimidazolium bis(trifluoromethanesulfonyl) amide | 79.33  | 79.39  | -0.06 | -0.08 |
| 1-Butyl-2,3-dimethylimidazolium tetrafluoroborate                   | 52.38  | 52.17  | 0.21  | 0.40  |
| 1-Butyl-2-methylpyridinium tetrafluoroborate                        | 53.45  | 53.58  | -0.13 | -0.24 |
| 1-Butyl-3-(2-cyanoethyl)-imidazolium chloride                       | 57.93  | 58.25  | -0.32 | -0.55 |
| 1-Butyl-3-(2-cyanoethyl)imidazolium thiocyanate                     | 67.06  | 67.10  | -0.04 | -0.06 |
| 1-Butyl-3-ethylimidazolium bis(trifluoromethylsulfonyl) amide       | 79.44  | 79.64  | -0.20 | -0.25 |
| 1-Butyl-3-ethylimidazolium triflate                                 | 63.01  | 62.83  | 0.18  | 0.29  |
| 1-Butyl-3-methylimidazolium 2-acryloamido-2-methylpropanesulfonate  | 88.52  | 88.95  | -0.43 | -0.49 |
| 1-Butyl-3-methylimidazolium acetate                                 | 54.18  | 53.91  | 0.27  | 0.50  |
| 1-Butyl-3-methylimidazolium bis(perfluorobutanesulfonyl) amide      | 105.39 | 105.45 | -0.06 | -0.06 |
| 1-Butyl-3-methylimidazolium bis(trifluoromethanesulfonyl) amide     | 74.99  | 75.05  | -0.06 | -0.08 |
| 1-Butyl-3-methylimidazolium dicyanoamide                            | 57.80  | 57.61  | 0.19  | 0.33  |
| 1-Butyl-3-methylimidazolium glycine                                 | 58.39  | 57.34  | 1.05  | 1.80  |
| 1-Butyl-3-methylimidazolium hexafluorophosphate                     | 51.46  | 51.56  | -0.10 | -0.19 |
| 1-Butyl-3-methylimidazolium methosulfate                            | 58.58  | 58.65  | -0.07 | -0.12 |
| 1-Butyl-3-methylimidazolium octylsulfate                            | 91.49  | 91.09  | 0.40  | 0.44  |
| 1-Butyl-3-methylimidazolium perfluorobutylsulfonate                 | 73.34  | 73.44  | -0.10 | -0.14 |
| 1-Butyl-3-methylimidazolium tetracyanoborate                        | 67.83  | 67.87  | -0.04 | -0.06 |
| 1-Butyl-3-methylimidazolium tetrafluoroborate                       | 47.81  | 47.83  | -0.02 | -0.04 |
| 1-Butyl-3-methylimidazolium thiocyanate                             | 57.79  | 58.09  | -0.30 | -0.52 |
| 1-Butyl-3-methylimidazolium threoninate                             | 68.48  | 67.95  | 0.53  | 0.77  |
| 1-Butyl-3-methylimidazolium tricyanomethanide                       | 65.33  | 65.39  | -0.06 | -0.09 |
| 1-Butyl-3-methylimidazolium trifluoromethylsulfonate                | 57.91  | 58.24  | -0.33 | -0.57 |
| 1-Butyl-4-methylpyridinium tetrafluoroborate                        | 54.00  | 53.84  | 0.16  | 0.30  |
| 1-Butylpyridinium 2-acryloamido-2-methylpropanesulfonate            | 91.01  | 90.15  | 0.86  | 0.94  |
| 1-Butylpyridinium bis(fluorosulfonyl) amide                         | 64.60  | 64.65  | -0.05 | -0.08 |
| 1-Butylpyridinium dicyanamide                                       | 58.87  | 58.81  | 0.06  | 0.10  |

|                                                                        |        |        |       |       |
|------------------------------------------------------------------------|--------|--------|-------|-------|
| 1-Butylpyridinium tetrafluoroborate                                    | 48.99  | 49.03  | -0.04 | -0.08 |
| 1-Butyltetrahydrothiophenium dicyanamide                               | 59.59  | 59.81  | -0.22 | -0.37 |
| 1-Decyl-3-methylimidazolium<br>bis(trifluoromethanesulfonyl) amide     | 102.90 | 102.83 | 0.07  | 0.07  |
| 1-Decyl-3-methylimidazolium<br>tetracyanoborate                        | 95.66  | 95.65  | 0.01  | 0.01  |
| 1-Decyl-3-methylimidazolium<br>tricyanomethanide                       | 93.23  | 93.17  | 0.06  | 0.06  |
| 1-Dodecyl-3-methylimidazolium<br>bis(trifluoromethanesulfonyl) amide   | 112.08 | 112.09 | -0.01 | -0.01 |
| 1-Ethyl-2,3-dimethylimidazolium<br>bis(trifluoromethanesulfonyl) amide | 69.94  | 70.13  | -0.19 | -0.27 |
| 1-Ethyl-3-methylimidazolium 1,1,2,2-<br>tetrafluoroethanesulfonate     | 53.91  | 53.77  | 0.14  | 0.26  |
| 1-Ethyl-3-methylimidazolium acetate                                    | 44.95  | 44.65  | 0.30  | 0.67  |
| 1-Ethyl-3-methylimidazolium aminoacetate                               | 47.68  | 48.08  | -0.40 | -0.84 |
| 1-Ethyl-3-methylimidazolium<br>bis(trifluoromethanesulfonyl) amide     | 65.77  | 65.79  | -0.02 | -0.03 |
| 1-Ethyl-3-methylimidazolium dicyanamide                                | 48.35  | 48.35  | 0.00  | 0.00  |
| 1-Ethyl-3-methylimidazolium<br>diethylphosphate                        | 64.56  | 64.35  | 0.21  | 0.33  |
| 1-Ethyl-3-methylimidazolium<br>dimethylphosphate                       | 55.17  | 55.03  | 0.14  | 0.25  |
| 1-Ethyl-3-methylimidazolium ethosulfate                                | 54.16  | 54.05  | 0.11  | 0.20  |
| 1-Ethyl-3-methylimidazolium<br>imidodisulfonyl fluoride                | 54.05  | 54.19  | -0.14 | -0.26 |
| 1-Ethyl-3-methylimidazolium L-alanine                                  | 52.10  | 52.64  | -0.54 | -1.04 |
| 1-Ethyl-3-methylimidazolium L-proline                                  | 58.84  | 59.70  | -0.86 | -1.46 |
| 1-Ethyl-3-methylimidazolium L-serine                                   | 54.05  | 54.05  | 0.00  | 0.00  |
| 1-Ethyl-3-methylimidazolium<br>methanesulfonate                        | 48.45  | 48.69  | -0.24 | -0.50 |
| 1-Ethyl-3-methylimidazolium methylsulfate                              | 48.62  | 49.39  | -0.77 | -1.58 |
| 1-Ethyl-3-methylimidazolium taurinate                                  | 56.41  | 56.96  | -0.55 | -0.98 |
| 1-Ethyl-3-methylimidazolium<br>tetracyanoborate                        | 58.77  | 58.61  | 0.16  | 0.27  |
| 1-Ethyl-3-methylimidazolium<br>tetrafluoroborate                       | 38.70  | 38.57  | 0.13  | 0.34  |
| 1-Ethyl-3-methylimidazolium thiocyanate                                | 48.31  | 48.83  | -0.52 | -1.08 |
| 1-Ethyl-3-methylimidazolium threoninate                                | 58.86  | 58.69  | 0.17  | 0.29  |
| 1-Ethyl-3-methylimidazolium tricyanomethide                            | 55.87  | 56.13  | -0.26 | -0.47 |
| 1-Ethyl-3-methylimidazolium<br>trifluoromethylsulfonate                | 48.91  | 48.98  | -0.07 | -0.14 |
| 1-Ethyl-3-methylpyridinium<br>bis(fluorosulfonyl) amide                | 60.16  | 60.20  | -0.04 | -0.07 |
| 1-Ethyl-3-methylpyridinium ethylsulfate                                | 60.18  | 60.06  | 0.12  | 0.20  |

|                                                                       |        |        |       |       |
|-----------------------------------------------------------------------|--------|--------|-------|-------|
| 1-Ethyl-3-propylimidazolium<br>bis(trifluoromethanesulfonyl) amide    | 74.95  | 75.01  | -0.06 | -0.08 |
| 1-Ethylmorpholinium tetrafluoroborate                                 | 40.81  | 39.89  | 0.92  | 2.25  |
| 1-Ethylpyridinium bis(fluorosulfonyl) amide                           | 55.18  | 55.39  | -0.21 | -0.38 |
| 1-Ethylpyridinium ethylsulfate                                        | 55.29  | 55.25  | 0.04  | 0.07  |
| 1-Ethylpyridinium triflate                                            | 50.05  | 50.18  | -0.13 | -0.26 |
| 1-Ethyltetrahydrothiophenium dicyanamide                              | 50.87  | 50.55  | 0.32  | 0.63  |
| 1-Heptyl-3-methylimidazolium<br>bis(trifluoromethanesulfonyl) amide   | 88.14  | 88.94  | -0.80 | -0.91 |
| 1-Heptyl-3-methylimidazolium<br>hexafluorophosphate                   | 65.44  | 65.45  | -0.01 | -0.02 |
| 1-Hexyl-1-methylpyrrolidinium<br>bis(trifluoromethanesulfonyl) amide  | 87.26  | 86.13  | 1.13  | 1.29  |
| 1-Hexyl-3,5-dimethylpyridinium<br>bis(trifluoromethylsulfonyl)amide   | 95.56  | 95.13  | 0.43  | 0.45  |
| 1-Hexyl-3-methylimidazolium acetate                                   | 63.54  | 63.17  | 0.37  | 0.58  |
| 1-Hexyl-3-methylimidazolium<br>bis(trifluoromethanesulfonyl) amide    | 84.23  | 84.31  | -0.08 | -0.09 |
| 1-Hexyl-3-methylimidazolium chloride                                  | 58.80  | 58.50  | 0.30  | 0.51  |
| 1-Hexyl-3-methylimidazolium dicyanoamide                              | 67.19  | 66.87  | 0.32  | 0.48  |
| 1-Hexyl-3-methylimidazolium<br>hexafluorophosphate                    | 60.69  | 60.82  | -0.13 | -0.21 |
| 1-Hexyl-3-methylimidazolium<br>tetracyanoborate                       | 76.88  | 77.13  | -0.25 | -0.33 |
| 1-Hexyl-3-methylimidazolium<br>tetrafluoroborate                      | 56.91  | 57.09  | -0.18 | -0.32 |
| 1-Hexyl-3-methylimidazolium thiocyanate                               | 68.17  | 67.35  | 0.82  | 1.20  |
| 1-Hexyl-3-methylimidazolium<br>tricyanomethanide                      | 74.67  | 74.65  | 0.02  | 0.03  |
| 1-Hexylpyridinium bis(fluorosulfonyl) amide                           | 73.94  | 73.91  | 0.03  | 0.04  |
| 1-Isobutyl-1-methylpyrrolidinium<br>bis(trifluoromethylsulfonyl)amide | 77.02  | 76.83  | 0.19  | 0.25  |
| 1-Isobutyl-3-methylimidazolium<br>bis(trifluoromethanesulfonyl) amide | 74.92  | 75.01  | -0.09 | -0.12 |
| 1-Isobutyl-3-methylpyridinium<br>bis(trifluoromethylsulfonyl)amide    | 81.23  | 81.02  | 0.21  | 0.26  |
| 1-Methyl-1-(2',3'-epoxypropyl)-2-<br>oxopyrrolidinium chloride        | 49.38  | 49.79  | -0.41 | -0.83 |
| 1-Methyl-1-decylpyrrolidinium<br>bis(trifluoromethanesulfonyl) amide  | 104.90 | 104.65 | 0.25  | 0.24  |
| 1-Methyl-1-propylpiperidinium<br>bis(trifluoromethylsulfonyl)amide    | 76.90  | 76.87  | 0.03  | 0.04  |
| 1-Methyl-1-propylpyrrolidinium<br>bis(fluorosulfonyl) amide           | 61.04  | 60.64  | 0.40  | 0.66  |

|                                                                       |       |       |       |       |
|-----------------------------------------------------------------------|-------|-------|-------|-------|
| 1-Methyl-1-propylpyrrolidinium<br>bis(trifluoromethanesulfonyl) amide | 72.50 | 72.24 | 0.26  | 0.36  |
| 1-Methyl-2-pyrrolidonium tetrafluoroborate                            | 37.04 | 37.68 | -0.64 | -1.73 |
| 1-Methyl-3-hexylimidazolium threoninate                               | 77.73 | 77.21 | 0.52  | 0.67  |
| 1-Methyl-3-pentylimidazolium threoninate                              | 73.07 | 72.58 | 0.49  | 0.67  |
| 1-Methyl-3-propylimidazolium threoninate                              | 63.75 | 63.32 | 0.43  | 0.67  |
| 1-Methylmorpholinium tetrafluoroborate                                | 35.90 | 35.57 | 0.33  | 0.92  |
| 1-Methylpiperidinium tetrafluoroborate                                | 37.84 | 38.51 | -0.67 | -1.77 |
| 1-Methylpyridinium methylsulfate                                      | 46.05 | 46.27 | -0.22 | -0.48 |
| 1-Methylpyrrolidinium tetrafluoroborate                               | 34.55 | 33.88 | 0.67  | 1.94  |
| 1-Nonyl-3-methylimidazolium<br>bis(trifluoromethanesulfonyl) amide    | 98.06 | 98.20 | -0.14 | -0.14 |
| 1-Nonyl-3-methylimidazolium<br>hexafluorophosphate                    | 74.74 | 74.71 | 0.03  | 0.04  |
| 1-Octyl-3-methylimidazolium<br>bis(trifluoromethanesulfonyl) amide    | 93.61 | 93.57 | 0.04  | 0.04  |
| 1-Octyl-3-methylimidazolium chloride                                  | 67.80 | 67.76 | 0.04  | 0.06  |
| 1-Octyl-3-methylimidazolium<br>hexafluorophosphate                    | 70.30 | 70.08 | 0.22  | 0.31  |
| 1-Octyl-3-methylimidazolium<br>tetracyanoborate                       | 86.41 | 86.39 | 0.02  | 0.02  |
| 1-Octyl-3-methylimidazolium<br>tetrafluoroborate                      | 66.24 | 66.35 | -0.11 | -0.17 |
| 1-Octyl-3-methylimidazolium<br>tricyanomethanide                      | 84.09 | 83.91 | 0.18  | 0.21  |
| 1-Octyl-3-methylpyridinium tetrafluoroborate                          | 72.74 | 72.36 | 0.38  | 0.52  |
| 1-Octylpyridinium<br>bis(trifluoromethylsulfonyl)amide                | 95.19 | 94.77 | 0.42  | 0.44  |
| 1-Pentyl-3-methylimidazolium acetate                                  | 59.01 | 58.54 | 0.47  | 0.80  |
| 1-Pentyl-3-methylimidazolium<br>bis(trifluoromethanesulfonyl) amide   | 79.57 | 79.68 | -0.11 | -0.14 |
| 1-Pentyl-3-methylimidazolium<br>hexafluorophosphate                   | 56.11 | 56.19 | -0.08 | -0.14 |
| 1-Pentyl-3-methylimidazolium<br>tetrafluoroborate                     | 52.25 | 52.46 | -0.21 | -0.40 |
| 1-Pentylpyridinium dicyanamide                                        | 63.44 | 63.44 | 0.00  | 0.00  |
| 1-Phenyl-2,3,5-trimethylpyrazolium<br>methylsulfonate                 | 68.77 | 69.35 | -0.58 | -0.84 |
| 1-Phenyl-2-butyl-3,5-dimethylpyrazolium<br>methylsulfonate            | 82.67 | 82.93 | -0.26 | -0.31 |
| 1-Phenyl-2-heptyl-3,5-dimethylpyrazolium<br>methylsulfonate           | 97.61 | 96.82 | 0.79  | 0.81  |
| 1-Phenyl-2-hexyl-3,5-dimethylpyrazolium<br>methylsulfonate            | 92.64 | 92.19 | 0.45  | 0.49  |

|                                                                    |        |        |       |       |
|--------------------------------------------------------------------|--------|--------|-------|-------|
| 1-Phenyl-2-pentyl-3,5-dimethylpyrazolium methylsulfonate           | 87.17  | 87.56  | -0.39 | -0.45 |
| 1-Propyl-3-methylimidazolium acetate                               | 49.37  | 49.28  | 0.09  | 0.18  |
| 1-Propyl-3-methylimidazolium bis(trifluoromethanesulfonyl) amide   | 70.48  | 70.42  | 0.06  | 0.09  |
| 1-Propyl-3-methylimidazolium tetrafluoroborate                     | 43.09  | 43.20  | -0.11 | -0.26 |
| 1-Propylpyridinium dicyanamide                                     | 54.24  | 54.18  | 0.06  | 0.11  |
| 1-Propylpyridinium tetrafluoroborate                               | 44.35  | 44.40  | -0.05 | -0.11 |
| 1-Propyronitrile-3-butylimidazolium bromide                        | 62.60  | 62.36  | 0.24  | 0.38  |
| 1-Propyronitrile-3-hexylimidazolium bromide                        | 71.74  | 71.62  | 0.12  | 0.17  |
| 1-Propyronitrile-3-octylimidazolium bromide                        | 80.51  | 80.88  | -0.37 | -0.46 |
| 2-Hydroxyethylammonium acetate                                     | 29.31  | 28.99  | 0.32  | 1.09  |
| 2-hydroxyethylammonium butanoate                                   | 38.53  | 38.25  | 0.28  | 0.73  |
| 2-Hydroxyethylammonium formate                                     | 24.85  | 24.70  | 0.15  | 0.60  |
| 2-Hydroxyethylammonium hexanoate                                   | 47.80  | 47.51  | 0.29  | 0.61  |
| 2-Hydroxyethylammonium lactate                                     | 34.69  | 35.04  | -0.35 | -1.01 |
| 2-Hydroxyethylammonium pentanoate                                  | 43.12  | 42.88  | 0.24  | 0.56  |
| 2-Hydroxyethylammonium propionate                                  | 33.29  | 33.62  | -0.33 | -0.99 |
| 3-Methyl-1-propylpyridinium bis(trifluoromethylsulfonyl)amide      | 76.40  | 76.43  | -0.03 | -0.04 |
| Bis(2-hydroxyethyl)ammonium hexanoate                              | 58.49  | 58.34  | 0.15  | 0.26  |
| Butylammonium nitrate                                              | 33.34  | 33.37  | -0.03 | -0.09 |
| Dimethyl butyl isopropylammonium bis(trifluoromethylsulfonyl)amide | 78.81  | 79.06  | -0.25 | -0.32 |
| Dimethyl hexyl isopropylammonium bis(trifluoromethylsulfonyl)amide | 89.14  | 88.32  | 0.82  | 0.92  |
| Dimethylpropylisopropylammonium bis(trifluoromethylsulfonyl)amide  | 73.56  | 74.43  | -0.87 | -1.18 |
| Ethylammonium nitrate                                              | 24.14  | 24.11  | 0.03  | 0.12  |
| L-Alanine 1-methylethyl ester dodecyl sulfate                      | 102.88 | 103.30 | -0.42 | -0.41 |
| L-Alanine 2-methylpropyl ester dodecyl sulfate                     | 107.40 | 107.88 | -0.48 | -0.45 |
| L-Proline 1-methylethyl ester dodecyl sulfate                      | 110.32 | 110.58 | -0.26 | -0.24 |
| L-Valine 1-methylethyl ester dodecyl sulfate                       | 112.65 | 112.52 | 0.13  | 0.12  |
| Morpholinium formate                                               | 32.20  | 32.26  | -0.06 | -0.19 |
| N-(2',3'-Epoxypropyl)-N-methylpyrrolidonium acetate                | 55.50  | 54.46  | 1.04  | 1.87  |
| N-Butyl-3-methylpyridinium bis(trifluoromethylsulfonyl)amide       | 80.49  | 81.06  | -0.57 | -0.71 |
| N-Butyl-3-methylpyridinium trifluoromethanesulfonate               | 64.26  | 64.25  | 0.01  | 0.02  |
| N-Butyl-4-methylthiazolium bis(trifluoromethylsulfonyl) amide      | 78.68  | 79.25  | -0.57 | -0.72 |

|                                                                                   |        |        |       |       |
|-----------------------------------------------------------------------------------|--------|--------|-------|-------|
| N-Butyl-4-methylthiazolium difluoro(oxalato)borate                                | 63.24  | 63.32  | -0.08 | -0.13 |
| N-Butyl-N-methylmorpholinium N-acetylalaninate                                    | 74.32  | 74.63  | -0.31 | -0.42 |
| N-Butyl-N-methylmorpholinium N-acetylleucinate                                    | 88.43  | 88.48  | -0.05 | -0.06 |
| N-Butyl-N-methylmorpholinium N-acetylvalinate                                     | 83.98  | 83.85  | 0.13  | 0.15  |
| N-Butylpyridinium bis(trifluoromethanesulfonyl) amide                             | 76.22  | 76.25  | -0.03 | -0.04 |
| N-Butylpyridinium triflate                                                        | 59.25  | 59.44  | -0.19 | -0.32 |
| N-Butylpyridinium trifluoroacetate                                                | 54.87  | 55.39  | -0.52 | -0.95 |
| N-Butylthiazolium bis(trifluoromethylsulfonyl) amide                              | 73.89  | 74.63  | -0.74 | -1.00 |
| N-Butylthiazolium difluoro(oxalato)borate                                         | 58.43  | 58.70  | -0.27 | -0.46 |
| N-Decylpyridinium bis(trifluoromethanesulfonyl) amide                             | 104.52 | 104.03 | 0.49  | 0.47  |
| N-Dodecylpyridinium bis(trifluoromethanesulfonyl) amide                           | 113.68 | 113.29 | 0.39  | 0.34  |
| N-Ethyl-2-methylpyridinium bis(trifluoromethylsulfonyl)amide                      | 71.54  | 71.54  | 0.00  | 0.00  |
| N-Ethylmorpholinium formate                                                       | 41.07  | 41.68  | -0.61 | -1.49 |
| N-Ethyl-N-methylmorpholinium N-acetylalaninate                                    | 65.23  | 65.37  | -0.14 | -0.21 |
| N-Ethyl-N-methylmorpholinium N-acetylisoleucinate                                 | 78.62  | 79.22  | -0.60 | -0.76 |
| N-Ethyl-N-methylmorpholinium N-acetylleucinate                                    | 78.65  | 79.22  | -0.57 | -0.72 |
| N-Ethyl-N-methylmorpholinium N-acetylvalinate                                     | 74.01  | 74.59  | -0.58 | -0.78 |
| N-Hexyl-N-methylmorpholinium N-acetylalaninate                                    | 83.42  | 83.89  | -0.47 | -0.56 |
| N-Hexyl-N-methylmorpholinium N-acetylleucinate                                    | 97.24  | 97.74  | -0.50 | -0.51 |
| N-Hexyl-N-methylmorpholinium N-acetylvalinate                                     | 92.26  | 93.11  | -0.85 | -0.92 |
| N-Isobutyl-3-sulfopropan-1-aminium hydrogen sulfate                               | 62.85  | 62.71  | 0.14  | 0.22  |
| N-Methyl-N-(2,3-dihydroxypropyl)pyrrolidinium bis(trifluoromethanesulfonyl) amide | 74.88  | 75.07  | -0.19 | -0.25 |
| N-Octyl-N-methylmorpholinium N-acetylalaninate                                    | 92.82  | 93.15  | -0.33 | -0.36 |
| N-Octyl-N-methylmorpholinium N-acetylvalinate                                     | 102.12 | 102.37 | -0.25 | -0.24 |

|                                                                     |        |        |       |       |
|---------------------------------------------------------------------|--------|--------|-------|-------|
| N-Propyl-2-methylpyridinium bis(trifluoromethylsulfonyl)amide       | 76.28  | 76.17  | 0.11  | 0.14  |
| N-Propyl-N-methylmorpholinium N-acetylalaninate                     | 69.57  | 70.00  | -0.43 | -0.62 |
| N-Propyl-N-methylmorpholinium N-acetylleucinate                     | 83.88  | 83.85  | 0.03  | 0.04  |
| N-Propyl-N-methylmorpholinium N-acetylvalinate                      | 79.02  | 79.22  | -0.20 | -0.25 |
| Propylammonium nitrate                                              | 28.78  | 28.74  | 0.04  | 0.14  |
| S-Butyl-dimethylthioformamidium bis(trifluoromethylsulfonyl) amide  | 79.26  | 79.02  | 0.24  | 0.30  |
| S-Butyl-dimethylthioformamidium difluorooxalylborate                | 63.42  | 63.09  | 0.33  | 0.52  |
| S-Ethyl-dimethylthioformamidium bis(trifluoromethylsulfonyl) amide  | 69.84  | 69.76  | 0.08  | 0.11  |
| S-Ethyl-dimethylthioformamidium difluorooxalylborate                | 53.86  | 53.83  | 0.03  | 0.06  |
| S-Ethyl-dimethylthioformamidium trifluoromethylsulfonate            | 53.62  | 52.95  | 0.67  | 1.25  |
| S-Methyl-dimethylthioformamidium bis(trifluoromethylsulfonyl) amide | 64.95  | 64.92  | 0.03  | 0.05  |
| S-Methyl-dimethylthioformamidium trifluoromethylsulfonate           | 48.32  | 48.11  | 0.21  | 0.43  |
| Tetrabutylphosphonium acetate                                       | 97.22  | 97.33  | -0.11 | -0.11 |
| Tetrabutylphosphonium formate                                       | 93.57  | 93.04  | 0.53  | 0.57  |
| Tetrabutylphosphonium propanoate                                    | 102.16 | 101.96 | 0.20  | 0.20  |
| Tetradecyl trihexylphosphonium bis(trifluoromethylsulfonyl)amide    | 192.57 | 192.55 | 0.02  | 0.01  |
| Tetradecyl trihexylphosphonium chloride                             | 166.32 | 166.74 | -0.42 | -0.25 |
| Tributylmethylammonium bis(trifluoromethylsulfonyl)amide            | 97.59  | 97.53  | 0.06  | 0.06  |
| Triethylammonium acetate                                            | 46.76  | 46.42  | 0.34  | 0.73  |
| Triethyldecylammonium bis(trifluoromethylsulfonyl) amide            | 111.38 | 111.11 | 0.27  | 0.24  |
| Triethyldodecylammonium bis(trifluoromethylsulfonyl) amide          | 120.72 | 120.37 | 0.35  | 0.29  |
| Triethylheptylammonium bis(trifluoromethylsulfonyl) amide           | 97.05  | 97.22  | -0.17 | -0.18 |
| Triethylhexylammonium bis(trifluoromethylsulfonyl) amide            | 92.72  | 92.59  | 0.13  | 0.14  |
| Triethyloctylammonium bis(trifluoromethylsulfonyl) amide            | 101.96 | 101.85 | 0.11  | 0.11  |
| Triethylsulfonium bis(trifluoromethylsulfonyl) amide                | 70.04  | 70.13  | -0.09 | -0.13 |



|                                                                  |        |        |       |       |
|------------------------------------------------------------------|--------|--------|-------|-------|
| Triethyltetradecylammonium<br>bis(trifluoromethylsulfonyl) amide | 129.84 | 129.63 | 0.21  | 0.16  |
| Trihexyl tetradecyl phosphonium dicyanamide                      | 174.84 | 175.11 | -0.27 | -0.15 |
| Trihexyl tetradecyl phosphonium<br>trifluoromethylsulfonate      | 175.69 | 175.74 | -0.05 | -0.03 |
| Trimethyl butylammonium<br>bis(trifluoromethylsulfonyl)amide     | 70.29  | 70.37  | -0.08 | -0.11 |
| Trimethyl hexylammonium<br>bis(trifluoromethylsulfonyl)amide     | 79.64  | 79.63  | 0.01  | 0.01  |
| Trimethyl octylammonium<br>bis(trifluoromethylsulfonyl)amide     | 88.97  | 88.89  | 0.08  | 0.09  |
| Trimethyl pentylammonium<br>bis(trifluoromethylsulfonyl)amide    | 75.01  | 75.00  | 0.01  | 0.01  |
| Trimethyl propylammonium<br>bis(trifluoromethylsulfonyl)amide    | 65.65  | 65.74  | -0.09 | -0.14 |
